# Supplementary material for: Numerical Simulation of Dry Granular Flow Impacting a Rigid Wall Using the Discrete Element Method
Source: PLoS One. 2016 Aug 11;11(8):e0160756. doi: 10.1371/journal.pone.0160756 (PMC4981468; doi:10.1371/journal.pone.0160756)
Supplement: S1 File — (XLS) [file pone.0160756.s001.xls]

## Sheet: Sheet1
time	normal force		time	normal force		time	normal force		time	normal force		time	normal force
0.068304	-0.0521104		0.049656	-0.0134979		0.049163	-0.0020057		0.036389	-0.000951282		0.048797	4.09088e-06
0.18917	-0.0508486		0.13753	-0.0138265		0.13616	-0.0020504		0.11549	-0.000968522		0.13515	4.23826e-06
0.38606	-0.049551		0.28066	-0.0141601		0.27787	-0.00209574		0.24433	-0.000985986		0.27581	4.38814e-06
0.70676	-0.0482133		0.5138	-0.0144992		0.50871	-0.00214177		0.4542	-0.00100369		0.50492	4.5407e-06
1.2291	-0.0468337		0.89358	-0.0148438		0.88471	-0.0021885		0.79606	-0.00102163		0.87813	4.69602e-06
2.0801	-0.0454081		1.5122	-0.0151943		1.4972	-0.00223598		1.3529	-0.00103981		1.486	4.85428e-06
3.4661	-0.0439382		2.5198	-0.0155506		2.4948	-0.00228418		2.26	-0.00105825		2.4763	5.01543e-06
5.7239	-0.0424279		4.1612	-0.0159124		4.1199	-0.00233308		3.7374	-0.00107693		4.0892	5.17929e-06
8.6507	-0.0408749		6.7975	-0.0162799		6.7301	-0.0023827		6.1441	-0.00109585		6.68	5.346e-06
11.578	-0.0392779		9.8304	-0.0166533		9.7328	-0.00243306		9.154	-0.00111503		9.6604	5.51559e-06
14.523	-0.037639		12.863	-0.0170316		12.736	-0.00248421		12.164	-0.00113444		12.641	5.67567e-06
17.497	-0.0359596		15.896	-0.0174141		15.738	-0.00253623		15.174	-0.00115406		15.621	5.80854e-06
20.471	-0.034242		18.929	-0.0177999		18.741	-0.00258915		18.184	-0.00117389		18.602	5.90342e-06
23.404	-0.03249		21.962	-0.018188		21.744	-0.00264305		21.194	-0.00119391		21.582	5.94432e-06
26.317	-0.0307026		24.995	-0.0185782		24.746	-0.00269796		24.203	-0.0012141		24.562	5.92386e-06
29.207	-0.0288778		28.027	-0.0189704		27.749	-0.00275392		27.213	-0.00123448		27.543	5.83976e-06
32.089	-0.0270176		31.06	-0.0193638		30.752	-0.002811		30.223	-0.00125502		30.523	5.6746e-06
35.019	-0.0251232		34.093	-0.0197573		33.755	-0.00286929		33.233	-0.0012757		33.504	5.41192e-06
37.948	-0.0231953		37.126	-0.0201509		36.757	-0.0029288		36.243	-0.00129654		36.484	5.05075e-06
40.903	-0.0212362		40.159	-0.0205445		39.76	-0.00298949		39.253	-0.00131751		39.464	4.59073e-06
43.896	-0.0192462		43.192	-0.0209378		42.763	-0.00305141		42.263	-0.00133862		42.445	4.02703e-06
46.887	-0.0172255		46.224	-0.0213307		45.766	-0.00311455		45.273	-0.00135988		45.425	3.36029e-06
49.877	-0.0151766		49.257	-0.0217224		48.768	-0.00317898		48.283	-0.00138125		48.406	2.57332e-06
52.899	-0.0131021		52.29	-0.0221114		51.771	-0.00324481		51.293	-0.00140272		51.386	1.64143e-06
55.96	-0.0110038		55.323	-0.0224972		54.774	-0.00331207		54.302	-0.00142427		54.366	5.58185e-07
58.95	-0.008884		58.356	-0.0228791		57.777	-0.0033808		57.312	-0.00144589		57.347	-6.87412e-07
61.969	-0.0067407		61.389	-0.0232573		60.779	-0.00345102		60.322	-0.00146759		60.327	-2.09593e-06
65.03	-0.00456979		64.421	-0.0236327		63.782	-0.00352271		63.332	-0.00148939		63.308	-3.65704e-06
68.071	-0.00237058		67.454	-0.0240049		66.785	-0.00359592		66.342	-0.00151127		66.288	-5.37636e-06
71.129	-0.000140769		70.487	-0.0243742		69.788	-0.00367067		69.352	-0.00153326		69.268	-7.25561e-06
74.205	0.00211956		73.52	-0.0247404		72.79	-0.00374697		72.362	-0.00155534		72.249	-9.29684e-06
77.325	0.00440832		76.553	-0.025103		75.793	-0.00382486		75.372	-0.00157751		75.229	-1.15081e-05
80.402	0.00672819		79.586	-0.0254623		78.796	-0.00390435		78.382	-0.00159978		78.21	-1.38856e-05
83.46	0.00908155		82.618	-0.025819		81.798	-0.00398542		81.391	-0.00162215		81.19	-1.64248e-05
86.504	0.0114653		85.651	-0.0261716		84.801	-0.00406817		84.401	-0.00164461		84.17	-1.91458e-05
89.541	0.0138757		88.684	-0.0265186		87.804	-0.0041527		87.411	-0.00166712		87.151	-2.20741e-05
92.576	0.016311		91.717	-0.0268594		90.807	-0.00423907		90.421	-0.00168967		90.131	-2.52234e-05
95.573	0.0187669		94.75	-0.0271924		93.809	-0.00432737		93.431	-0.00171223		93.112	-2.86162e-05
98.568	0.0212451		97.783	-0.0275176		96.812	-0.00441763		96.441	-0.0017348		96.092	-3.22545e-05
101.54	0.0237495		100.82	-0.027836		99.815	-0.00450983		99.451	-0.00175741		99.072	-3.61291e-05
104.48	0.0262778		103.85	-0.0281463		102.82	-0.00460405		102.46	-0.00178003		102.05	-4.0258e-05
107.4	0.0288289		106.88	-0.028448		105.82	-0.00470036		105.47	-0.00180265		105.03	-4.46544e-05
110.31	0.0314036		109.91	-0.0287413		108.82	-0.00479873		108.4	-0.00182527		108.01	-4.93117e-05
113.21	0.034001		112.95	-0.0290265		111.76	-0.00489913		111.28	-0.00184791		110.99	-5.42246e-05
116.11	0.0366224		115.98	-0.0293041		114.62	-0.00500155		114.07	-0.00187057		113.91	-5.93871e-05
119.13	0.0392695		118.99	-0.0295748		117.44	-0.00510591		116.8	-0.00189327		116.76	-6.47852e-05
122.14	0.0419409		121.92	-0.0298381		120.22	-0.00521228		119.49	-0.001916		119.58	-7.04286e-05
125.16	0.0446342		124.82	-0.0300931		122.97	-0.00532072		122.12	-0.00193874		122.31	-7.63342e-05
128.17	0.0473498		127.68	-0.03034		125.67	-0.00543119		124.64	-0.00196149		124.95	-8.24948e-05
131.19	0.0500869		130.5	-0.030579		128.25	-0.0055437		127.08	-0.00198427		127.56	-8.8908e-05
134.21	0.0528462		133.28	-0.0308099		130.79	-0.00565826		129.48	-0.00200706		130.09	-9.55799e-05
137.23	0.0556295		136.01	-0.0310328		133.29	-0.00577491		131.84	-0.00202988		132.59	-0.000102512
140.25	0.0584366		138.7	-0.0312472		135.76	-0.00589369		134.14	-0.00205271		134.71	-0.00010971
143.25	0.0612676		141.3	-0.0314528		138.2	-0.00601466		136.35	-0.00207555		136.77	-0.000117185
146.26	0.064123		143.89	-0.03165		140.6	-0.00613778		138.53	-0.00209841		139.06	-0.000124929
149.33	0.0670029		146.43	-0.0318393		142.96	-0.006263		140.68	-0.0021213		141.36	-0.000132932
152.46	0.0699081		148.84	-0.0320208		145.24	-0.00639034		142.86	-0.00214421		143.62	-0.000141195
155.56	0.0728397		151.22	-0.0321947		147.38	-0.00651979		144.92	-0.00216717		145.85	-0.000149714
158.57	0.0757952		153.57	-0.0323598		149.51	-0.00665144		146.96	-0.00219014		148.05	-0.000158509
161.54	0.0787711		155.89	-0.0325144		151.61	-0.00678543		148.97	-0.0022131		150.21	-0.000167614
164.47	0.0817658		158.18	-0.0326576		153.7	-0.00692182		150.87	-0.00223602		152.34	-0.000177039
167.37	0.0847762		160.44	-0.0327884		155.77	-0.00706071		152.8	-0.00225889		154.43	-0.000186805
170.23	0.0878019		162.67	-0.032906		157.81	-0.00720213		154.74	-0.00228169		156.52	-0.000196923
173.06	0.0908439		164.88	-0.0330106		159.84	-0.00734612		156.68	-0.00230443		158.59	-0.000207395
175.85	0.0938994		167.07	-0.0331007		161.85	-0.00749279		158.55	-0.00232707		160.56	-0.000218245
178.6	0.0969658		169.24	-0.0331749		163.85	-0.00764224		160.38	-0.00234961		162.45	-0.000229499
181.31	0.100044		171.39	-0.0332337		165.75	-0.00779445		162.24	-0.00237203		164.26	-0.000241147
183.95	0.103135		173.53	-0.0332779		167.63	-0.00794936		164.07	-0.00239437		165.96	-0.000253178
186.56	0.106239		175.64	-0.0333073		169.5	-0.00810698		165.71	-0.00241662		167.66	-0.000265591
189.15	0.109357		177.74	-0.0333228		171.37	-0.00826726		167.32	-0.00243879		169.35	-0.000278375
191.71	0.112487		179.82	-0.0333233		173.22	-0.00843028		168.92	-0.00246087		171.03	-0.00029155
194.24	0.115626		181.89	-0.0333068		175.07	-0.00859621		170.51	-0.00248282		172.71	-0.000305149
196.75	0.118773		183.94	-0.0332733		176.91	-0.00876504		172.11	-0.00250464		174.43	-0.00031917
199.23	0.121928		185.99	-0.0332227		178.68	-0.00893678		173.71	-0.00252632		176.12	-0.000333618
201.69	0.125092		188.02	-0.0331553		180.44	-0.00911145		175.31	-0.00254788		177.79	-0.000348491
204.12	0.128272		190.03	-0.0330724		182.19	-0.00928899		176.93	-0.00256935		179.42	-0.000363768
206.54	0.131469		192.04	-0.0329741		183.92	-0.00946942		178.55	-0.00259072		181.12	-0.000379453
208.95	0.134684		194.03	-0.0328605		185.62	-0.00965277		180.22	-0.00261201		182.87	-0.000395544
211.35	0.13792		196.01	-0.0327324		187.32	-0.00983901		181.91	-0.00263323		184.62	-0.000412033
213.73	0.141178		197.97	-0.0325899		189.01	-0.0100281		183.57	-0.00265438		186.32	-0.000428916
216.08	0.144461		199.92	-0.032434		190.7	-0.0102201		185.22	-0.00267548		187.9	-0.00044618
218.42	0.147773		201.84	-0.0322659		192.39	-0.0104148		186.85	-0.00269657		189.39	-0.000463808
220.74	0.151114		203.75	-0.0320847		194.07	-0.0106125		188.42	-0.00271762		190.91	-0.000481817
223.05	0.154479		205.65	-0.031889		195.75	-0.0108131		189.97	-0.00273861		192.46	-0.000500229
225.29	0.15787		207.53	-0.0316786		197.41	-0.0110167		191.52	-0.00275954		193.99	-0.00051905
227.51	0.161284		209.4	-0.0314525		199.06	-0.0112234		193.05	-0.00278039		195.52	-0.000538296
229.71	0.164725		211.25	-0.0312116		200.68	-0.0114331		194.58	-0.00280117		197.05	-0.000557957
231.9	0.168198		213.1	-0.0309576		202.29	-0.0116458		196.09	-0.00282192		198.57	-0.000578009
234.08	0.171704		214.93	-0.0306898		203.9	-0.0118616		197.52	-0.00284264		200.08	-0.000598462
236.24	0.175243		216.75	-0.0304083		205.49	-0.0120804		198.92	-0.00286332		201.59	-0.000619319
238.38	0.178816		218.56	-0.030113		207.05	-0.0123024		200.32	-0.00288397		203.09	-0.000640582
240.51	0.18242		220.36	-0.0298032		208.61	-0.0125274		201.73	-0.00290457		204.58	-0.00066226
242.63	0.186055		222.15	-0.0294792		210.16	-0.0127555		203.13	-0.00292512		206.06	-0.000684352
244.73	0.189723		223.94	-0.0291412		211.71	-0.0129868		204.51	-0.00294564		207.54	-0.000706854
246.82	0.193422		225.71	-0.0287885		213.26	-0.0132212		205.88	-0.00296611		209.01	-0.000729775
248.89	0.197152		227.48	-0.0284209		214.8	-0.0134588		207.32	-0.00298653		210.48	-0.000753126
250.96	0.200912		229.24	-0.0280379		216.32	-0.0136996		208.79	-0.0030069		211.95	-0.000776912
253.01	0.2047		230.99	-0.0276388		217.84	-0.0139438		210.25	-0.00302719		213.41	-0.000801143
255.05	0.20852		232.74	-0.0272246		219.34	-0.0141911		211.71	-0.00304742		214.87	-0.000825809
257.03	0.212377		234.48	-0.0267965		220.84	-0.0144417		213.16	-0.00306764		216.31	-0.000850893
259.01	0.216274		236.2	-0.0263548		222.33	-0.0146955		214.6	-0.00308783		217.75	-0.000876391
260.97	0.220213		237.92	-0.0259003		223.81	-0.0149525		216.04	-0.00310803		219.16	-0.000902294
262.92	0.224196		239.62	-0.0254329		225.28	-0.0152127		217.47	-0.00312823		220.56	-0.000928605
264.86	0.228219		241.31	-0.0249519		226.74	-0.0154761		218.89	-0.00314842		221.94	-0.000955333
266.78	0.232285		242.99	-0.024458		228.2	-0.0157428		220.31	-0.00316862		223.31	-0.000982471
268.7	0.236398		244.66	-0.0239519		229.65	-0.0160128		221.72	-0.00318883		224.65	-0.00101001
270.61	0.240553		246.32	-0.0234319		231.09	-0.016286		223.11	-0.00320904		225.98	-0.00103798
272.51	0.244747		247.97	-0.0228965		232.52	-0.0165627		224.45	-0.0032292		227.31	-0.0010664
274.39	0.248977		249.61	-0.0223444		233.95	-0.016843		225.78	-0.00324929		228.62	-0.0010953
276.27	0.253237		251.24	-0.0217736		235.38	-0.0171269		227.12	-0.00326929		229.93	-0.0011247
278.14	0.257528		252.86	-0.021184		236.8	-0.0174145		228.46	-0.00328918		231.23	-0.00115462
279.99	0.261854		254.48	-0.0205762		238.21	-0.0177058		229.8	-0.00330898		232.52	-0.00118504
281.84	0.26621		256.09	-0.0199485		239.62	-0.018001		231.14	-0.00332865		233.81	-0.001216
283.69	0.270593		257.72	-0.0192996		241.02	-0.0183001		232.5	-0.00334818		235.11	-0.00124751
285.56	0.275005		259.41	-0.0186295		242.42	-0.0186031		233.85	-0.00336757		236.42	-0.00127958
287.47	0.279443		261.11	-0.0179381		243.82	-0.01891		235.19	-0.00338681		237.76	-0.00131221
289.38	0.28391		262.79	-0.0172253		245.21	-0.0192209		236.51	-0.0034059		239.11	-0.0013454
291.28	0.288407		264.43	-0.0164914		246.6	-0.0195358		237.82	-0.00342486		240.45	-0.00137915
293.17	0.292929		266.01	-0.0157349		247.99	-0.0198548		239.11	-0.00344364		241.79	-0.00141349
295.06	0.297471		267.59	-0.0149534		249.37	-0.020178		240.39	-0.00346222		243.11	-0.00144844
296.93	0.302033		269.16	-0.0141466		250.75	-0.0205055		241.66	-0.00348058		244.44	-0.00148403
298.79	0.306612		270.72	-0.0133135		252.12	-0.0208374		242.93	-0.0034987		245.71	-0.00152027
300.58	0.311211		272.28	-0.0124546		253.52	-0.0211736		244.18	-0.0035166		246.95	-0.00155714
302.37	0.315837		273.83	-0.0115721		254.93	-0.021514		245.43	-0.00353432		248.19	-0.00159463
304.14	0.320492		275.38	-0.010666		256.34	-0.0218587		246.66	-0.00355186		249.42	-0.00163272
305.96	0.325178		276.93	-0.009737		257.74	-0.0222077		247.9	-0.00356924		250.64	-0.00167143
307.78	0.329898		278.47	-0.00878528		259.15	-0.0225609		249.12	-0.00358648		251.86	-0.00171073
309.52	0.334649		280.05	-0.0078103		260.55	-0.0229184		250.35	-0.00360354		253.07	-0.00175064
311.25	0.339438		281.64	-0.00681332		261.95	-0.0232802		251.62	-0.00362048		254.28	-0.00179114
312.97	0.344268		283.17	-0.00579564		263.34	-0.0236463		252.93	-0.0036373		255.48	-0.00183223
314.69	0.349135		284.66	-0.00475554		264.74	-0.0240166		254.23	-0.00365399		256.69	-0.00187391
316.4	0.354034		286.13	-0.00369079		266.13	-0.0243914		255.5	-0.00367049		257.89	-0.00191624
318.1	0.358963		287.59	-0.00260047		267.52	-0.0247708		256.74	-0.00368679		259.09	-0.00195922
319.79	0.363916		289.02	-0.00148253		268.91	-0.0251549		257.96	-0.00370285		260.3	-0.00200289
321.48	0.368897		290.46	-0.000337691		270.29	-0.0255436		259.16	-0.00371869		261.5	-0.00204725
323.16	0.373913		291.89	0.000832026		271.66	-0.025937		260.35	-0.00373435		262.71	-0.00209226
324.84	0.378961		293.33	0.00202789		273.02	-0.026335		261.59	-0.00374981		263.92	-0.00213794
326.51	0.384041		294.77	0.00325056		274.37	-0.0267378		262.89	-0.00376505		265.14	-0.0021843
328.17	0.389143		296.23	0.00449835		275.72	-0.0271437		264.2	-0.00377972		266.37	-0.00223142
329.83	0.394251		297.71	0.0057698		277.06	-0.0275505		265.44	-0.00379327		267.58	-0.00227939
331.48	0.399359		299.16	0.00706321		278.39	-0.0279568		266.65	-0.00380541		268.78	-0.00232826
333.12	0.404458		300.59	0.0083759		279.72	-0.0283604		267.91	-0.00381567		269.97	-0.00237811
334.76	0.409538		302.05	0.00970804		281.04	-0.0287605		269.2	-0.00382382		271.16	-0.00242899
336.39	0.414595		303.5	0.0110606		282.35	-0.0291569		270.49	-0.00382977		272.35	-0.00248094
338.01	0.419616		304.95	0.0124317		283.66	-0.0295472		271.77	-0.00383299		273.54	-0.00253404
339.63	0.424585		306.39	0.01382		284.96	-0.0299295		273.06	-0.00383299		274.71	-0.00258841
341.26	0.429504		307.83	0.015225		286.26	-0.0303036		274.33	-0.00382974		275.88	-0.00264404
342.96	0.434376		309.26	0.0166457		287.55	-0.0306694		275.61	-0.00382327		277.04	-0.00270091
344.65	0.439199		310.68	0.0180817		288.84	-0.0310263		276.88	-0.00381343		278.11	-0.00275907
346.29	0.443974		312.1	0.0195331		290.12	-0.0313744		278.15	-0.00380023		279.14	-0.0028185
347.92	0.448688		313.52	0.0209976		291.39	-0.0317116		279.42	-0.00378318		280.17	-0.00287929
349.55	0.453321		314.94	0.0224729		292.67	-0.0320346		280.69	-0.00376153		281.19	-0.00294159
351.17	0.457868		316.33	0.0239577		293.94	-0.0323425		281.95	-0.00373511		282.22	-0.00300542
352.79	0.462325		317.7	0.0254504		295.2	-0.0326341		283.21	-0.00370361		283.25	-0.00307084
354.4	0.466687		319.07	0.026952		296.46	-0.0329092		284.47	-0.00366697		284.27	-0.00313786
356.01	0.47096		320.44	0.0284651		297.72	-0.0331692		285.73	-0.00362549		285.3	-0.00320646
357.6	0.475139		321.82	0.0299897		298.97	-0.0334136		286.98	-0.00357897		286.34	-0.00327669
359.2	0.479218		323.2	0.0315271		300.24	-0.0336422		288.24	-0.00352734		287.37	-0.00334857
360.81	0.483197		324.58	0.0330771		301.5	-0.0338548		289.49	-0.00347053		288.41	-0.00342212
362.44	0.487071		325.95	0.0346382		302.72	-0.0340503		290.74	-0.00340832		289.46	-0.00349737
364.06	0.490842		327.32	0.0362122		303.93	-0.0342292		291.98	-0.0033408		290.51	-0.00357434
365.68	0.494511		328.69	0.0378003		305.14	-0.0343923		293.21	-0.00326809		291.56	-0.003653
367.29	0.498063		330.05	0.0394002		306.34	-0.0345369		294.45	-0.00318959		292.63	-0.00373347
368.9	0.501479		331.41	0.0410087		307.54	-0.0346597		295.7	-0.00310455		293.68	-0.00381588
370.5	0.504749		332.77	0.0426242		308.75	-0.034759		296.95	-0.00301258		294.72	-0.0039003
372.09	0.507855		334.12	0.0442436		309.96	-0.0348318		298.2	-0.00291301		295.76	-0.00398684
373.68	0.510795		335.48	0.0458677		311.18	-0.034878		299.45	-0.00280576		296.78	-0.00407553
375.27	0.513574		336.83	0.0474988		312.4	-0.0348988		300.65	-0.00269109		297.8	-0.00416636
376.84	0.516177		338.17	0.049135		313.62	-0.0348919		301.85	-0.00256846		298.8	-0.0042594
378.42	0.518592		339.52	0.0507751		314.84	-0.0348556		303.04	-0.00243746		299.8	-0.00435475
379.98	0.520828		340.86	0.0524199		316.07	-0.0347908		304.22	-0.0022983		300.8	-0.00445238
381.55	0.522891		342.2	0.0540693		317.29	-0.0346983		305.39	-0.00215115		301.79	-0.00455223
383.1	0.524787		343.53	0.0557241		318.49	-0.0345787		306.57	-0.00199619		302.77	-0.0046543
384.65	0.526529		344.86	0.0573862		319.69	-0.0344341		307.75	-0.00183384		303.75	-0.0047585
386.2	0.528109		346.18	0.0590541		320.87	-0.034263		308.91	-0.0016638		304.73	-0.00486489
387.74	0.529515		347.5	0.0607261		322.05	-0.0340634		310.07	-0.00148559		305.7	-0.00497356
389.28	0.530754		348.81	0.0624026		323.23	-0.0338363		311.22	-0.00129942		306.68	-0.00508448
390.81	0.531832		350.12	0.0640835		324.4	-0.0335818		312.37	-0.00110537		307.64	-0.00519762
392.33	0.532742		351.42	0.0657688		325.58	-0.0332993		313.51	-0.000903254		308.61	-0.00531302
393.86	0.533481		352.72	0.0674594		326.77	-0.0329887		314.68	-0.00069302		309.58	-0.00543072
395.37	0.534044		354.02	0.0691549		327.96	-0.0326493		315.86	-0.000474457		310.55	-0.00555076
396.88	0.534421		355.31	0.070855		329.14	-0.0322796		317.06	-0.000247245		311.52	-0.00567321
398.39	0.534619		356.59	0.0725602		330.32	-0.0318807		318.26	-1.16056e-05		312.49	-0.00579802
399.89	0.534651		357.88	0.0742712		331.5	-0.0314541		319.45	0.000232116		313.46	-0.00592513
401.39	0.534516		359.15	0.0759885		332.68	-0.0309995		320.63	0.000483973		314.43	-0.00605457
402.88	0.534215		360.43	0.0777126		333.87	-0.0305174		321.81	0.000743875		315.4	-0.00618632
404.37	0.533734		361.7	0.0794415		335.07	-0.0300055		322.97	0.0010124		316.38	-0.00632049
405.85	0.533046		362.96	0.0811719		336.25	-0.0294593		324.14	0.00129051		317.37	-0.00645725
407.33	0.532141		364.23	0.0829022		337.42	-0.0288775		325.3	0.00157858		318.35	-0.00659668
408.8	0.531005		365.49	0.0846302		338.58	-0.0282572		326.45	0.00187721		319.35	-0.00673888
410.27	0.529627		366.73	0.086355		339.73	-0.0275973		327.6	0.00218672		320.34	-0.00688393
411.73	0.528007		367.98	0.0880771		340.88	-0.0268975		328.75	0.00250717		321.35	-0.00703183
413.19	0.526123		369.22	0.0897939		342.02	-0.0261547		329.89	0.00283931		322.36	-0.00718272
414.65	0.523956		370.46	0.091503		343.16	-0.0253657		331.04	0.00318386		323.38	-0.00733676
416.1	0.521514		371.71	0.0932052		344.31	-0.0245315		332.22	0.00354058		324.4	-0.00749388
417.54	0.518808		372.96	0.0949016		345.46	-0.0236538		333.39	0.00390911		325.43	-0.00765404
418.99	0.51584		374.2	0.0965925		346.62	-0.0227327		334.57	0.00428944		326.45	-0.00781722
420.42	0.512621		375.44	0.0982791		347.79	-0.0217696		335.72	0.00468121		327.47	-0.00798338
421.86	0.509135		376.68	0.0999594		348.95	-0.0207622		336.86	0.00508502		328.48	-0.00815262
423.29	0.505354		377.91	0.10163		350.12	-0.0197059		337.98	0.00550187		329.48	-0.00832512
424.71	0.501281		379.14	0.103291		351.27	-0.0186011		339.08	0.0059317		330.48	-0.00850089
426.13	0.496914		380.37	0.104942		352.4	-0.0174472		340.18	0.00637465		331.47	-0.00867994
427.55	0.492252		381.6	0.106583		353.51	-0.0162447		341.27	0.00683067		332.46	-0.00886228
428.96	0.487309		382.82	0.10822		354.61	-0.0149961		342.36	0.0072992		333.45	-0.00904784
430.37	0.482081		384.04	0.109852		355.7	-0.0137012		343.44	0.00778033		334.43	-0.00923664
431.77	0.476566		385.26	0.11148		356.78	-0.0123601		344.51	0.00827407		335.41	-0.00942869
433.17	0.470772		386.48	0.113107		357.86	-0.0109742		345.59	0.00878015		336.38	-0.00962397
434.57	0.464702		387.69	0.114732		358.94	-0.00954389		346.67	0.00929847		337.36	-0.00982246
435.96	0.458365		388.9	0.116358		360.01	-0.00807099		347.76	0.00982866		338.33	-0.0100241
437.35	0.451772		390.11	0.117989		361.09	-0.0065577		348.84	0.0103703		339.31	-0.0102288
438.73	0.44491		391.32	0.119622		362.18	-0.00500203		349.93	0.0109238		340.28	-0.0104368
440.11	0.437761		392.52	0.121255		363.27	-0.00340088		351.02	0.0114898		341.25	-0.010648
441.48	0.43032		393.72	0.122889		364.37	-0.00175369		352.11	0.0120686		342.22	-0.0108626
442.86	0.422577		394.92	0.12452		365.46	-5.84948e-05		353.2	0.0126607		343.19	-0.0110806
444.25	0.414535		396.12	0.126152		366.55	0.00168347		354.29	0.0132656		344.15	-0.011302
445.63	0.406211		397.31	0.127789		367.63	0.00346896		355.36	0.0138828		345.12	-0.0115268
447.01	0.397597		398.5	0.12943		368.71	0.00529918		356.43	0.0145126		346.08	-0.0117549
448.39	0.388688		399.68	0.131076		369.79	0.00717456		357.48	0.0151551		347.05	-0.0119864
449.76	0.379486		400.86	0.132726		370.87	0.00909508		358.53	0.0158103		348.01	-0.0122213
451.13	0.369984		402.05	0.134378		371.94	0.0110622		359.57	0.0164786		348.97	-0.0124597
452.5	0.360184		403.23	0.136034		373	0.0130756		360.61	0.0171597		349.94	-0.0127015
453.86	0.350091		404.41	0.137694		374.05	0.0151346		361.64	0.0178537		350.9	-0.0129468
455.22	0.339697		405.59	0.139357		375.11	0.0172407		362.68	0.0185609		351.87	-0.0131956
456.58	0.328994		406.77	0.141023		376.16	0.0193949		363.71	0.0192814		352.84	-0.0134479
457.93	0.317979		407.94	0.14269		377.21	0.0215979		364.75	0.0200156		353.81	-0.0137038
459.28	0.306645		409.12	0.144357		378.27	0.0238512		365.79	0.0207636		354.77	-0.0139634
460.63	0.294999		410.29	0.146027		379.33	0.0261532		366.84	0.0215253		355.72	-0.0142266
461.97	0.283051		411.45	0.147703		380.41	0.0285015		367.9	0.0223001		356.66	-0.0144934
463.31	0.270802		412.62	0.149387		381.49	0.0308958		368.95	0.0230879		357.59	-0.0147637
464.64	0.258257		413.78	0.15108		382.58	0.0333348		369.99	0.0238886		358.52	-0.0150375
465.97	0.245415		414.95	0.152784		383.68	0.0358185		371.03	0.0247021		359.43	-0.0153149
467.3	0.232269		416.11	0.154495		384.78	0.0383485		372.07	0.0255288		360.34	-0.0155958
468.63	0.218827		417.26	0.156216		385.88	0.0409235		373.1	0.0263684		361.24	-0.0158804
469.95	0.205091		418.42	0.15795		386.96	0.0435425		374.14	0.0272208		362.14	-0.0161684
471.28	0.191045		419.55	0.159692		388.02	0.0462087		375.17	0.0280866		363.03	-0.0164602
472.75	0.176664		420.68	0.161439		389.07	0.0489257		376.2	0.0289668		363.92	-0.0167558
474.22	0.161935		421.81	0.16319		390.11	0.0516963		377.24	0.0298618		364.8	-0.0170553
475.67	0.146834		422.94	0.16494		391.15	0.0545245		378.28	0.0307727		365.67	-0.017359
477.11	0.131356		424.09	0.166688		392.17	0.0574109		379.31	0.0316996		366.54	-0.0176667
478.55	0.115506		425.23	0.168438		393.2	0.0603545		380.35	0.0326423		367.41	-0.0179786
479.98	0.0992623		426.37	0.170185		394.22	0.063359		381.39	0.0336016		368.28	-0.0182948
481.41	0.0826058		427.48	0.171928		395.24	0.0664272		382.42	0.0345783		369.14	-0.0186154
482.84	0.0655372		428.59	0.173666		396.27	0.0695592		383.45	0.0355722		370	-0.0189403
484.27	0.0480553		429.69	0.175399		397.29	0.0727554		384.48	0.0365837		370.86	-0.0192697
485.69	0.0301572		430.8	0.177128		398.33	0.0760162		385.5	0.0376126		371.72	-0.0196036
487.11	0.0118473		431.93	0.178853		399.37	0.0793407		386.51	0.038659		372.58	-0.0199419
488.53	-0.00689477		433.05	0.180571		400.42	0.0827325		387.53	0.0397235		373.43	-0.0202848
489.94	-0.0260979		434.17	0.182278		401.46	0.0861965		388.54	0.0408073		374.29	-0.0206325
491.35	-0.0457682		435.29	0.183972		402.47	0.0897337		389.56	0.0419106		375.14	-0.020985
492.76	-0.0659177		436.41	0.185652		403.46	0.0933463		390.57	0.043034		376	-0.0213424
494.16	-0.0865415		437.52	0.187321		404.44	0.097033		391.59	0.0441772		376.85	-0.0217048
495.56	-0.107619		438.63	0.188982		405.4	0.10079		392.61	0.0453394		377.71	-0.0220719
496.96	-0.129153		439.74	0.190637		406.36	0.104617		393.64	0.0465206		378.57	-0.0224438
498.35	-0.151139		440.85	0.192287		407.32	0.108514		394.66	0.0477206		379.43	-0.0228204
499.74	-0.173575		441.96	0.193934		408.28	0.11248		395.67	0.0489394		380.29	-0.0232019
501.13	-0.196468		443.06	0.195577		409.25	0.116515		396.67	0.0501773		381.15	-0.0235882
502.51	-0.219807		444.16	0.197218		410.23	0.120619		397.66	0.0514337		382.02	-0.0239792
503.9	-0.24358		445.26	0.198861		411.23	0.124787		398.62	0.0527081		382.89	-0.024375
505.27	-0.267806		446.35	0.200503		412.26	0.129025		399.58	0.0540015		383.77	-0.0247756
506.65	-0.292515		447.44	0.202139		413.28	0.133337		400.53	0.0553148		384.64	-0.0251812
508.02	-0.317719		448.5	0.203768		414.27	0.137724		401.49	0.0566486		385.52	-0.025592
509.39	-0.343442		449.55	0.205385		415.25	0.142192		402.44	0.0580038		386.39	-0.026008
510.76	-0.369678		450.61	0.206992		416.21	0.146738		403.39	0.0593802		387.25	-0.0264294
512.12	-0.396408		451.66	0.208594		417.17	0.15136		404.34	0.0607769		388.11	-0.0268558
513.48	-0.423648		452.73	0.210189		418.11	0.156059		405.29	0.0621947		388.96	-0.0272876
514.84	-0.451408		453.81	0.211776		419.06	0.160838		406.23	0.0636339		389.8	-0.0277247
516.19	-0.479642		454.89	0.213353		420.02	0.165685		407.18	0.0650905		390.64	-0.0281658
517.54	-0.508294		455.95	0.214913		420.98	0.170586		408.12	0.0665593		391.48	-0.0286092
518.89	-0.537323		456.99	0.216456		421.95	0.175532		409.07	0.0680369		392.31	-0.0290537
520.24	-0.566663		458.03	0.217979		422.94	0.180508		410.01	0.0695179		393.13	-0.0294975
521.58	-0.596301		459.05	0.219478		423.93	0.185508		410.95	0.0710006		393.96	-0.02994
522.92	-0.626246		460.09	0.22095		424.93	0.190535		411.88	0.0724849		394.78	-0.0303811
524.25	-0.656436		461.13	0.222391		425.92	0.195573		412.82	0.0739654		395.6	-0.0308189
525.59	-0.686822		462.19	0.223796		426.92	0.20061		413.76	0.0754372		396.41	-0.0312518
526.92	-0.717398		463.25	0.225165		427.9	0.205644		414.7	0.0769002		397.22	-0.0316797
528.25	-0.748155		464.31	0.226501		428.86	0.210673		415.63	0.0783536		398.04	-0.0321025
529.57	-0.77908		465.37	0.227803		429.82	0.215693		416.56	0.0797963		398.85	-0.0325197
530.89	-0.810177		466.43	0.229071		430.77	0.220706		417.48	0.0812285		399.65	-0.0329315
532.21	-0.841384		467.48	0.230302		431.72	0.225697		418.39	0.0826447		400.46	-0.0333359
533.53	-0.872619		468.52	0.231489		432.67	0.230644		419.3	0.0840376		401.27	-0.0337306
534.84	-0.903855		469.56	0.232632		433.62	0.235543		420.21	0.085405		402.08	-0.0341147
536.15	-0.935053		470.6	0.233728		434.58	0.240382		421.12	0.0867433		402.88	-0.0344871
537.46	-0.966222		471.65	0.234775		435.55	0.245164		422.03	0.088053		403.69	-0.034848
538.76	-0.99742		472.69	0.235775		436.55	0.249901		422.95	0.0893379		404.5	-0.0351983
540.06	-1.02864		473.73	0.236723		437.54	0.25459		423.87	0.0905967		405.31	-0.0355378
541.36	-1.05988		474.77	0.237617		438.5	0.259232		424.79	0.0918295		406.12	-0.0358662
542.65	-1.09115		475.81	0.238457		439.43	0.263825		425.72	0.0930358		406.94	-0.0361835
543.95	-1.12242		476.84	0.239242		440.35	0.268362		426.65	0.094213		407.82	-0.0364887
545.24	-1.1537		477.84	0.23997		441.26	0.272849		427.58	0.0953627		408.73	-0.0367824
546.53	-1.18504		478.84	0.240642		442.16	0.277292		428.51	0.0964869		409.62	-0.0370651
547.81	-1.21636		479.82	0.241253		443.05	0.281673		429.44	0.0975793		410.51	-0.0373347
549.09	-1.24757		480.81	0.241796		443.94	0.28597		430.37	0.098632		411.39	-0.0375885
550.37	-1.27862		481.81	0.242269		444.83	0.290173		431.28	0.0996407		412.26	-0.0378253
551.65	-1.30943		482.81	0.242668		445.73	0.294259		432.19	0.100598		413.13	-0.0380424
552.92	-1.34		483.84	0.242989		446.64	0.298231		433.08	0.101505		413.99	-0.0382399
554.19	-1.37039		484.85	0.243233		447.56	0.302099		433.97	0.102363		414.85	-0.0384188
555.46	-1.40053		485.85	0.243396		448.5	0.305848		434.86	0.103169		415.7	-0.0385773
556.73	-1.43038		486.83	0.243472		449.44	0.309467		435.74	0.103917		416.56	-0.038714
557.99	-1.45996		487.8	0.243466		450.38	0.312963		436.62	0.104611		417.42	-0.0388297
559.25	-1.4893		488.76	0.243379		451.3	0.316338		437.51	0.105251		418.27	-0.0389248
560.51	-1.51842		489.73	0.243215		452.2	0.319599		438.39	0.105839		419.13	-0.0390001
561.76	-1.54737		490.72	0.242976		453.1	0.322758		439.29	0.106381		420	-0.039057
563.01	-1.57612		491.77	0.242662		453.98	0.325806		440.18	0.106872		420.87	-0.0390946
564.25	-1.60461		492.83	0.242267		454.87	0.32873		441.07	0.107308		421.74	-0.0391111
565.49	-1.63286		493.87	0.241796		455.75	0.331535		441.95	0.107692		422.62	-0.0391073
566.73	-1.66089		494.88	0.241249		456.63	0.334222		442.84	0.108023		423.51	-0.0390834
567.97	-1.68868		495.9	0.240626		457.56	0.336788		443.72	0.1083		424.4	-0.0390389
569.21	-1.71623		496.92	0.239922		458.49	0.339234		444.6	0.108523		425.28	-0.0389737
570.44	-1.74355		497.97	0.239137		459.42	0.341556		445.48	0.108691		426.16	-0.0388872
571.67	-1.77059		499.03	0.238266		460.35	0.343747		446.35	0.108801		427.02	-0.0387784
572.89	-1.79738		500.08	0.237312		461.28	0.345812		447.22	0.108855		427.88	-0.0386481
574.12	-1.82396		501.11	0.23628		462.21	0.347761		448.09	0.108856		428.74	-0.0384973
575.34	-1.85034		502.11	0.235169		463.13	0.349592		448.96	0.108804		429.6	-0.0383261
576.56	-1.87653		503.09	0.233979		464.06	0.35131		449.83	0.1087		430.45	-0.0381349
577.78	-1.90247		504.05	0.232706		464.98	0.352899		450.69	0.108539		431.31	-0.0379215
578.99	-1.92804		505.02	0.23134		465.91	0.354332		451.56	0.10831		432.17	-0.0376827
580.2	-1.95321		506.01	0.229879		466.83	0.355598		452.42	0.10801		433.03	-0.0374172
581.41	-1.9779		507.04	0.228318		467.76	0.356681		453.28	0.107633		433.88	-0.0371229
582.62	-2.00208		508.04	0.226653		468.69	0.357571		454.14	0.107175		434.74	-0.0367986
583.82	-2.02576		509.01	0.224883		469.62	0.35827		454.99	0.106637		435.59	-0.0364443
585.02	-2.04886		509.97	0.223002		470.56	0.358756		455.85	0.10601		436.44	-0.0360575
586.22	-2.07129		510.92	0.221002		471.48	0.359011		456.7	0.105287		437.28	-0.0356356
587.42	-2.09308		511.87	0.218886		472.38	0.35904		457.55	0.104472		438.13	-0.0351795
588.61	-2.11428		512.85	0.216658		473.27	0.358854		458.4	0.103567		438.97	-0.0346904
589.81	-2.1349		513.86	0.21432		474.15	0.358454		459.25	0.102573		439.8	-0.0341684
590.99	-2.15497		514.88	0.211874		475.03	0.35785		460.1	0.101494		440.64	-0.0336149
592.18	-2.17443		515.9	0.209316		475.91	0.357025		460.95	0.100323		441.47	-0.0330278
593.37	-2.19318		516.89	0.206636		476.8	0.355953		461.79	0.0990514		442.31	-0.0324035
594.55	-2.21121		517.87	0.203835		477.69	0.354634		462.64	0.0976785		443.15	-0.0317423
595.73	-2.22851		518.84	0.200913		478.59	0.353064		463.48	0.0962033		443.99	-0.0310438
596.91	-2.24511		519.82	0.197868		479.48	0.351249		464.32	0.0946271		444.82	-0.0303083
598.08	-2.2611		520.82	0.194704		480.37	0.349208		465.17	0.0929567		445.65	-0.0295379
599.26	-2.27647		521.83	0.191417		481.25	0.346941		466	0.0911919		446.47	-0.0287326
600.43	-2.29125		522.84	0.188006		482.14	0.34445		466.83	0.0893332		447.3	-0.0278924
601.59	-2.30547		523.84	0.184473		483.03	0.341745		467.65	0.087384		448.12	-0.0270184
602.76	-2.31915		524.82	0.18082		483.91	0.33883		468.47	0.0853456		448.94	-0.0261111
603.93	-2.33236		525.76	0.177046		484.78	0.335718		469.29	0.0832224		449.77	-0.0251719
605.13	-2.34516		526.69	0.173156		485.66	0.332425		470.12	0.0810202		450.6	-0.0242026
606.33	-2.35751		527.61	0.169144		486.55	0.328939		470.95	0.0787343		451.42	-0.0232016
607.52	-2.36933		528.55	0.165005		487.45	0.325241		471.8	0.0763574		452.25	-0.0221664
608.71	-2.38061		529.5	0.160737		488.33	0.321326		472.66	0.0738883		453.07	-0.0210967
609.9	-2.39128		530.48	0.156335		489.21	0.317182		473.52	0.0713223		453.89	-0.0199908
611.08	-2.40141		531.44	0.151801		490.09	0.31282		474.39	0.0686628		454.71	-0.0188498
612.26	-2.4111		532.36	0.147138		490.96	0.308262		475.25	0.065918		455.53	-0.0176762
613.44	-2.42032		533.27	0.142342		491.82	0.303504		476.09	0.0630852		456.36	-0.0164693
614.61	-2.42907		534.18	0.137411		492.69	0.298542		476.92	0.0601638		457.18	-0.0152287
615.79	-2.43735		535.1	0.132346		493.57	0.293377		477.75	0.0571537		457.99	-0.0139543
616.96	-2.44512		536.03	0.127146		494.45	0.287999		478.56	0.0540513		458.81	-0.012645
618.13	-2.4524		536.99	0.12181		495.34	0.282411		479.37	0.0508576		459.62	-0.0113012
619.3	-2.4592		537.95	0.116341		496.23	0.276616		480.17	0.047574		460.43	-0.00992316
620.46	-2.46549		538.91	0.110735		497.14	0.270607		480.98	0.0441975		461.24	-0.00851
621.62	-2.47126		539.87	0.10499		498.06	0.264377		481.79	0.0407256		462.06	-0.00706079
622.79	-2.47647		540.81	0.0991049		498.96	0.257921		482.6	0.0371565		462.87	-0.0055749
623.94	-2.48109		541.74	0.0930783		499.85	0.25123		483.42	0.0334869		463.69	-0.00405131
625.1	-2.48518		542.68	0.0869104		500.73	0.244315		484.25	0.0297205		464.51	-0.00249116
626.26	-2.48883		543.62	0.080603		501.6	0.237195		485.09	0.025864		465.34	-0.000896498
627.41	-2.49204		544.6	0.0741553		502.47	0.229874		485.94	0.0219183		466.16	0.000732321
628.56	-2.49487		545.58	0.067567		503.32	0.222364		486.78	0.0178873		466.98	0.00239421
629.71	-2.49733		546.56	0.0608381		504.18	0.214663		487.63	0.0137703		467.8	0.0040893
630.85	-2.49937		547.5	0.0539675		505.03	0.206761		488.47	0.00956391		468.62	0.00581877
632	-2.50103		548.42	0.0469558		505.87	0.198668		489.32	0.00527148		469.44	0.00758154
633.14	-2.50235		549.31	0.0398035		506.71	0.190392		490.16	0.000895614		470.26	0.00937681
634.28	-2.50326		550.19	0.0325051		507.55	0.181913		490.99	-0.00357113		471.08	0.0112071
635.42	-2.50364		551.08	0.0250532		508.4	0.173205		491.81	-0.0081378		471.91	0.0130754
636.55	-2.50343		551.98	0.0174434		509.27	0.164252		492.63	-0.0128106		472.74	0.0149838
637.71	-2.50251		552.9	0.00966908		510.14	0.155025		493.44	-0.0175995		473.57	0.0169358
638.89	-2.50088		553.83	0.00172784		511.01	0.145523		494.25	-0.0225057		474.38	0.0189317
640.07	-2.49858		554.74	-0.00638016		511.86	0.135753		495.06	-0.0275263		475.18	0.0209705
641.24	-2.49551		555.62	-0.0146616		512.7	0.125693		495.87	-0.0326699		475.97	0.0230554
642.43	-2.49159		556.49	-0.0231226		513.53	0.115321		496.69	-0.0379438		476.76	0.0251886
643.62	-2.48683		557.36	-0.0317633		514.37	0.104641		497.52	-0.0433477		477.55	0.0273702
644.81	-2.48122		558.23	-0.0405838		515.2	0.093648		498.33	-0.0488824		478.33	0.0296003
645.99	-2.47475		559.12	-0.0495856		516.04	0.0823416		499.14	-0.0545488		479.11	0.0318795
647.17	-2.46746		560.03	-0.0587677		516.88	0.0707275		499.94	-0.0603447		479.9	0.0342068
648.34	-2.45925		560.94	-0.0681364		517.72	0.0587826		500.74	-0.0662786		480.69	0.0365853
649.52	-2.44999		561.85	-0.0777007		518.57	0.0464747		501.53	-0.0723622		481.49	0.0390188
650.69	-2.43966		562.76	-0.0874625		519.42	0.0337971		502.32	-0.0785979		482.29	0.0415082
651.86	-2.42819		563.67	-0.0974255		520.28	0.0207355		503.11	-0.0849909		483.1	0.0440552
653.02	-2.41563		564.56	-0.107589		521.12	0.00729986		503.9	-0.0915379		483.93	0.0466587
654.19	-2.40211		565.45	-0.117949		521.95	-0.00648117		504.69	-0.098229		484.75	0.0493157
655.35	-2.38763		566.35	-0.128507		522.77	-0.0206072		505.47	-0.105064		485.56	0.0520261
656.51	-2.37224		567.27	-0.139263		523.58	-0.0350688		506.26	-0.112041		486.37	0.054789
657.67	-2.35596		568.21	-0.150216		524.4	-0.0498623		507.05	-0.119157		487.15	0.057604
658.82	-2.33875		569.15	-0.16137		525.21	-0.0649957		507.84	-0.126416		487.93	0.0604723
659.98	-2.3207		570.08	-0.172721		526.03	-0.0804514		508.63	-0.133812		488.7	0.0633917
661.13	-2.30189		570.97	-0.184268		526.84	-0.0962108		509.42	-0.141338		489.46	0.0663604
662.28	-2.28222		571.84	-0.196016		527.66	-0.112299		510.21	-0.149004		490.22	0.0693812
663.42	-2.26155		572.69	-0.207974		528.49	-0.128746		511	-0.156821		490.97	0.072458
664.57	-2.23983		573.53	-0.220147		529.33	-0.145568		511.8	-0.164793		491.72	0.0755925
665.71	-2.21695		574.38	-0.23254		530.18	-0.162792		512.61	-0.172932		492.47	0.0787882
666.85	-2.19295		575.24	-0.245155		531.05	-0.180408		513.4	-0.181233		493.22	0.082044
668	-2.16796		576.11	-0.257986		531.91	-0.198388		514.19	-0.189687		493.98	0.0853568
669.15	-2.1419		576.99	-0.271038		532.76	-0.21675		514.97	-0.198301		494.74	0.0887287
670.29	-2.11474		577.86	-0.284316		533.59	-0.235503		515.75	-0.207078		495.5	0.0921609
671.42	-2.08621		578.7	-0.2978		534.42	-0.254606		516.52	-0.215997		496.28	0.0956473
672.54	-2.05587		579.53	-0.311466		535.23	-0.274013		517.3	-0.225032		497.06	0.0991802
673.67	-2.0235		580.36	-0.325297		536.04	-0.293684		518.07	-0.234164		497.85	0.102754
674.79	-1.98879		581.19	-0.339269		536.85	-0.313558		518.85	-0.243363		498.63	0.106359
675.91	-1.9515		582.04	-0.353373		537.65	-0.333628		519.63	-0.252623		499.4	0.109995
677.03	-1.91152		582.9	-0.367612		538.45	-0.353904		520.4	-0.261946		500.16	0.113661
678.15	-1.86844		583.76	-0.38196		539.25	-0.374334		521.17	-0.271305		500.92	0.11735
679.28	-1.82184		584.62	-0.396395		540.07	-0.394877		521.94	-0.280676		501.67	0.121055
680.41	-1.77172		585.5	-0.410916		540.89	-0.415523		522.71	-0.290057		502.41	0.124775
681.53	-1.71815		586.37	-0.425521		541.73	-0.436258		523.49	-0.299441		503.15	0.128509
682.66	-1.66101		587.23	-0.440206		542.56	-0.45707		524.27	-0.308823		503.89	0.132254
683.78	-1.60031		588.08	-0.454972		543.36	-0.477959		525.06	-0.318202		504.62	0.136011
684.9	-1.53568		588.93	-0.469794		544.16	-0.498872		525.85	-0.327552		505.36	0.139771
686.02	-1.46653		589.79	-0.484637		544.95	-0.519738		526.66	-0.336834		506.09	0.143524
687.13	-1.39273		590.68	-0.49949		545.74	-0.540531		527.48	-0.346035		506.82	0.147265
688.25	-1.31406		591.59	-0.514338		546.52	-0.561211		528.29	-0.355137		507.56	0.150989
689.36	-1.23045		592.5	-0.529185		547.31	-0.581793		529.09	-0.364144		508.29	0.154696
690.47	-1.14204		593.39	-0.544051		548.1	-0.602327		529.89	-0.373079		509.03	0.158396
691.58	-1.04867		594.23	-0.558933		548.9	-0.622808		530.68	-0.381938		509.78	0.162086
692.69	-0.950219		595.06	-0.573832		549.71	-0.643249		531.47	-0.390725		510.52	0.165768
693.79	-0.846632		595.87	-0.588747		550.53	-0.663645		532.25	-0.399437		511.28	0.169441
694.9	-0.737758		596.67	-0.603667		551.35	-0.683965		533.04	-0.40806		512.04	0.173101
696	-0.623616		597.48	-0.618602		552.17	-0.704237		533.82	-0.416604		512.8	0.176751
697.1	-0.504259		598.3	-0.633564		552.96	-0.724488		534.61	-0.425083		513.58	0.180396
698.2	-0.379238		599.13	-0.648523		553.75	-0.744653		535.38	-0.433463		514.35	0.184025
699.29	-0.247974		599.97	-0.66344		554.52	-0.764653		536.15	-0.441703		515.12	0.187627
700.39	-0.11016		600.8	-0.678296		555.29	-0.784446		536.91	-0.44978		515.88	0.191193
701.48	0.0346907		601.61	-0.693058		556.06	-0.803954		537.67	-0.457656		516.63	0.194714
702.57	0.186675		602.4	-0.707725		556.83	-0.823185		538.44	-0.465332		517.38	0.198189
703.66	0.345668		603.19	-0.722319		557.6	-0.842188		539.22	-0.472831		518.12	0.201626
704.75	0.512083		603.98	-0.736814		558.37	-0.860909		540.01	-0.480125		518.85	0.205016
705.83	0.68625		604.78	-0.751191		559.14	-0.879311		540.81	-0.487193		519.58	0.208354
706.92	0.868005		605.59	-0.765462		559.92	-0.897416		541.6	-0.494046		520.3	0.211642
708	1.05718		606.41	-0.779636		560.71	-0.915229		542.37	-0.500691		521.03	0.214883
709.08	1.25364		607.23	-0.793723		561.51	-0.932772		543.14	-0.507138		521.75	0.218079
710.16	1.45708		608.06	-0.807747		562.31	-0.95009		543.89	-0.51341		522.47	0.221238
711.24	1.66769		608.91	-0.821694		563.11	-0.967149		544.64	-0.519491		523.18	0.224355
712.31	1.88587		609.74	-0.835541		563.92	-0.983901		545.38	-0.525354		523.9	0.227422
713.39	2.11143		610.55	-0.849298		564.72	-1.00036		546.12	-0.531011		524.62	0.230442
714.46	2.34429		611.36	-0.862969		565.51	-1.01653		546.85	-0.536462		525.35	0.233416
715.53	2.58461		612.18	-0.876549		566.28	-1.03241		547.59	-0.541701		526.07	0.236343
716.6	2.83249		613	-0.890043		567.05	-1.04799		548.32	-0.546733		526.8	0.239222
717.66	3.08811		613.85	-0.903441		567.82	-1.06328		549.05	-0.551549		527.53	0.242053
718.73	3.35175		614.73	-0.916732		568.58	-1.07824		549.78	-0.556136		528.27	0.244831
719.8	3.62322		615.6	-0.929929		569.34	-1.0929		550.52	-0.560505		529.01	0.24756
720.86	3.90222		616.45	-0.943047		570.11	-1.10729		551.25	-0.564671		529.76	0.250244
721.93	4.18883		617.26	-0.956089		570.87	-1.1214		551.99	-0.568635		530.52	0.252884
722.99	4.48297		618.05	-0.969062		571.65	-1.13525		552.72	-0.572405		531.27	0.255482
724.05	4.7851		618.82	-0.981939		572.44	-1.14878		553.46	-0.575949		532.02	0.258029
725.11	5.09599		619.59	-0.994672		573.24	-1.16191		554.2	-0.579216		532.75	0.26051
726.17	5.41593		620.36	-1.00724		574.03	-1.17458		554.95	-0.582189		533.48	0.262919
727.24	5.74537		621.13	-1.01963		574.81	-1.18675		555.71	-0.584834		534.2	0.265246
728.3	6.0846		621.92	-1.03181		575.57	-1.19837		556.46	-0.587135		534.91	0.267487
729.36	6.43367		622.72	-1.04379		576.32	-1.20947		557.2	-0.589095		535.62	0.269643
730.43	6.79317		623.52	-1.05553		577.06	-1.21995		557.92	-0.590674		536.32	0.271702
731.49	7.16371		624.3	-1.067		577.81	-1.22977		558.65	-0.591835		537.02	0.273654
732.55	7.54507		625.07	-1.07821		578.55	-1.23893		559.36	-0.592592		537.72	0.275501
733.6	7.93695		625.82	-1.08918		579.29	-1.24747		560.08	-0.592961		538.42	0.27725
734.66	8.33937		626.57	-1.09992		580.04	-1.2554		560.79	-0.592945		539.13	0.278901
735.72	8.75203		627.33	-1.11045		580.8	-1.26274		561.5	-0.592564		539.83	0.28046
736.78	9.17539		628.09	-1.12073		581.56	-1.26946		562.22	-0.591787		540.54	0.281918
737.84	9.61028		628.87	-1.13071		582.34	-1.27543		562.94	-0.590561		541.26	0.28326
738.9	10.0566		629.65	-1.14042		583.13	-1.28068		563.67	-0.588889		541.99	0.284486
739.95	10.5145		630.44	-1.14982		583.93	-1.28519		564.4	-0.586764		542.72	0.285594
741	10.984		631.25	-1.15895		584.71	-1.28897		565.14	-0.584196		543.46	0.286588
742.05	11.4647		632.06	-1.16782		585.48	-1.29211		565.87	-0.581223		544.2	0.287479
743.1	11.9566		632.85	-1.17645		586.24	-1.29461		566.61	-0.577845		544.93	0.288267
744.15	12.4599		633.62	-1.18483		586.98	-1.2965		567.36	-0.57407		545.65	0.288956
745.2	12.9744		634.4	-1.19299		587.72	-1.2978		568.11	-0.569915		546.36	0.289549
746.24	13.5		635.18	-1.20093		588.45	-1.29853		568.88	-0.565387		547.07	0.29005
747.29	14.0364		635.96	-1.20868		589.18	-1.29874		569.65	-0.560513		547.78	0.290467
748.33	14.5833		636.77	-1.21626		589.91	-1.2985		570.43	-0.555325		548.48	0.290809
749.37	15.1412		637.6	-1.22366		590.64	-1.29777		571.2	-0.549798		549.18	0.29107
750.41	15.7105		638.45	-1.23084		591.38	-1.29648		571.96	-0.543896		549.88	0.291239
751.45	16.2915		639.28	-1.2378		592.13	-1.29461		572.72	-0.537614		550.58	0.291313
752.48	16.8843		640.06	-1.24451		592.89	-1.29212		573.48	-0.530926		551.28	0.291286
753.52	17.489		640.82	-1.251		593.64	-1.28905		574.23	-0.523854		551.99	0.291165
754.55	18.1051		641.56	-1.2573		594.41	-1.28551		574.99	-0.516444		552.7	0.290963
755.59	18.7327		642.3	-1.26341		595.17	-1.28146		575.75	-0.508684		553.41	0.290676
756.62	19.3721		643.03	-1.26932		595.93	-1.27691		576.5	-0.500571		554.12	0.290306
757.65	20.0233		643.77	-1.27504		596.68	-1.27186		577.26	-0.492106		554.84	0.289851
758.67	20.6864		644.51	-1.28055		597.42	-1.26626		578.02	-0.483269		555.55	0.289306
759.7	21.3614		645.27	-1.28585		598.16	-1.26014		578.78	-0.474065		556.26	0.288672
760.73	22.0482		646.04	-1.29096		598.88	-1.25349		579.53	-0.464502		556.96	0.287952
761.75	22.7471		646.81	-1.29585		599.61	-1.2463		580.28	-0.454564		557.65	0.287141
762.77	23.4584		647.55	-1.30053		600.33	-1.23854		581.02	-0.44424		558.34	0.286237
763.79	24.182		648.28	-1.30498		601.06	-1.23019		581.76	-0.433519		559.03	0.285235
764.81	24.9184		649	-1.30919		601.78	-1.22123		582.5	-0.422385		559.71	0.284131
765.83	25.6672		649.71	-1.31318		602.51	-1.21169		583.24	-0.41086		560.39	0.282932
766.85	26.4282		650.43	-1.31699		603.25	-1.20165		583.98	-0.398981		561.06	0.28165
767.86	27.2014		651.16	-1.32061		604	-1.19114		584.72	-0.386757		561.74	0.280287
768.88	27.9866		651.91	-1.32408		604.76	-1.18021		585.46	-0.374209		562.41	0.27885
769.89	28.7839		652.66	-1.32738		605.53	-1.16884		586.2	-0.361338		563.09	0.277339
770.9	29.5935		653.43	-1.33051		606.27	-1.157		586.93	-0.348121		563.76	0.275748
771.91	30.4153		654.22	-1.33349		607.02	-1.14474		587.65	-0.334579		564.43	0.274082
772.92	31.2491		654.99	-1.33632		607.75	-1.13207		588.36	-0.320728		565.11	0.272348
773.92	32.0954		655.75	-1.33898		608.48	-1.11894		589.07	-0.306529		565.78	0.270533
774.93	32.955		656.5	-1.34141		609.2	-1.10524		589.77	-0.291934		566.46	0.268623
775.93	33.8284		657.24	-1.3436		609.92	-1.09093		590.47	-0.276912		567.14	0.266608
776.94	34.7161		657.98	-1.3455		610.63	-1.07588		591.17	-0.261409		567.83	0.264474
777.94	35.6184		658.72	-1.3471		611.35	-1.06011		591.86	-0.24542		568.51	0.262218
778.94	36.5352		659.48	-1.34841		612.06	-1.04364		592.56	-0.228964		569.2	0.259846
779.94	37.467		660.26	-1.34941		612.79	-1.02638		593.26	-0.211995		569.88	0.257345
780.94	38.4145		661.08	-1.35005		613.52	-1.00828		593.97	-0.194476		570.56	0.254704
781.93	39.3776		661.89	-1.35034		614.26	-0.989332		594.66	-0.176409		571.25	0.251923
782.93	40.3565		662.66	-1.35027		615.01	-0.969528		595.36	-0.15779		571.94	0.249002
783.92	41.3512		663.4	-1.34984		615.78	-0.948864		596.06	-0.138615		572.63	0.245939
784.91	42.3616		664.12	-1.34907		616.52	-0.927366		596.76	-0.118897		573.32	0.242738
785.9	43.3884		664.82	-1.34792		617.25	-0.904949		597.46	-0.0985915		574.01	0.239387
786.89	44.4323		665.52	-1.34633		617.97	-0.881494		598.16	-0.077637		574.69	0.235866
787.88	45.4937		666.22	-1.34429		618.67	-0.85698		598.87	-0.0560213		575.37	0.232173
788.87	46.5728		666.92	-1.34178		619.37	-0.831352		599.58	-0.0337171		576.04	0.228299
789.86	47.6696		667.64	-1.33881		620.07	-0.804654		600.28	-0.0107442		576.71	0.22425
790.84	48.7834		668.36	-1.33545		620.76	-0.776998		600.97	0.0128416		577.37	0.220044
791.82	49.9144		669.1	-1.33167		621.45	-0.748391		601.66	0.0370387		578.03	0.215681
792.8	51.0624		669.83	-1.32752		622.14	-0.718874		602.35	0.0618283		578.69	0.211167
793.79	52.2274		670.54	-1.32299		622.84	-0.688462		603.03	0.0872028		579.35	0.206504
794.76	53.4097		671.24	-1.31807		623.55	-0.657128		603.72	0.113178		580.01	0.201689
795.74	54.6088		671.93	-1.31279		624.26	-0.624942		604.4	0.139718		580.67	0.196731
796.72	55.8245		672.61	-1.3072		624.98	-0.591979		605.09	0.166788		581.33	0.191642
797.7	57.0575		673.3	-1.30123		625.7	-0.558148		605.78	0.194433		581.98	0.186408
798.67	58.3084		673.99	-1.29485		626.43	-0.523333		606.47	0.222716		582.64	0.181011
799.64	59.5778		674.7	-1.28802		627.16	-0.487485		607.16	0.25166		583.29	0.175443
800.61	60.8663		675.41	-1.28071		627.87	-0.450498		607.84	0.281321		583.95	0.169688
801.58	62.1738		676.14	-1.27292		628.58	-0.412413		608.53	0.31168		584.6	0.163752
802.55	63.4997		676.88	-1.26471		629.28	-0.373345		609.22	0.34268		585.26	0.157652
803.52	64.8446		677.63	-1.25606		629.97	-0.333228		609.91	0.374356		585.92	0.151379
804.49	66.2087		678.37	-1.24693		630.66	-0.29203		610.6	0.406724		586.59	0.144926
805.45	67.5908		679.09	-1.23726		631.35	-0.249859		611.29	0.439705		587.26	0.138306
806.42	68.9892		679.8	-1.22687		632.03	-0.206818		611.99	0.473207		587.93	0.131527
807.38	70.4028		680.5	-1.21571		632.72	-0.163014		612.7	0.507152		588.61	0.1246
808.34	71.8297		681.21	-1.20366		633.41	-0.118613		613.41	0.541423		589.28	0.117544
809.3	73.2696		681.93	-1.19066		634.11	-0.0736168		614.13	0.576003		589.95	0.110357
810.29	74.7228		682.66	-1.17664		634.81	-0.0279808		614.86	0.610911		590.62	0.10303
811.31	76.1875		683.4	-1.16147		635.52	0.0181696		615.58	0.646045		591.3	0.0955758
812.33	77.6622		684.18	-1.14501		636.25	0.0647415		616.31	0.681322		591.97	0.0880012
813.35	79.147		684.96	-1.12726		636.96	0.111706		617.02	0.716728		592.64	0.0803102
814.36	80.6415		685.69	-1.10825		637.66	0.158999		617.74	0.75223		593.32	0.0725121
815.38	82.1453		686.4	-1.08793		638.36	0.206593		618.45	0.787805		594	0.064609
816.39	83.6586		687.09	-1.06631		639.06	0.254484		619.16	0.823455		594.68	0.0566016
817.4	85.1797		687.77	-1.04326		639.76	0.302535		619.86	0.859072		595.36	0.0485034
818.41	86.7061		688.44	-1.01859		640.45	0.35058		620.57	0.894519		596.04	0.0403301
819.42	88.2373		689.11	-0.992245		641.14	0.398544		621.27	0.929745		596.72	0.0320898
820.43	89.7719		689.78	-0.964161		641.82	0.44632		621.95	0.964671		597.4	0.0237946
821.43	91.3104		690.45	-0.934304		642.51	0.493959		622.62	0.999325		598.08	0.015436
822.44	92.8545		691.14	-0.90272		643.19	0.54161		623.29	1.03381		598.77	0.00699532
823.44	94.4037		691.84	-0.869348		643.89	0.589269		623.95	1.0681		599.45	-0.00152934
824.44	95.9586		692.55	-0.83414		644.59	0.63699		624.6	1.10223		600.13	-0.0101471
825.44	97.5189		693.24	-0.79708		645.28	0.68476		625.26	1.13619		600.8	-0.0188573
826.44	99.0839		693.91	-0.758117		645.97	0.732491		625.91	1.16992		601.47	-0.0276498
827.44	100.654		694.57	-0.717253		646.65	0.780268		626.57	1.20346		602.13	-0.0365362
828.43	102.231		695.23	-0.674501		647.33	0.828171		627.24	1.23688		602.79	-0.0455273
829.43	103.812		695.88	-0.629711		648.02	0.876036		627.91	1.27004		603.45	-0.0546062
830.42	105.395		696.54	-0.582686		648.73	0.923666		628.59	1.3028		604.1	-0.0637536
831.42	106.978		697.2	-0.533323		649.44	0.970952		629.28	1.33506		604.76	-0.0729585
832.41	108.559		697.88	-0.481461		650.17	1.0177		629.98	1.36667		605.42	-0.0822
833.41	110.138		698.57	-0.42706		650.89	1.06393		630.67	1.39766		606.08	-0.0914842
834.42	111.717		699.26	-0.370158		651.6	1.1098		631.35	1.4281		606.74	-0.100829
835.44	113.294		699.97	-0.310614		652.3	1.15517		632.01	1.45791		607.41	-0.110221
836.45	114.867		700.69	-0.248315		653.01	1.19995		632.67	1.487		608.08	-0.119655
837.44	116.438		701.4	-0.183316		653.7	1.24419		633.32	1.51542		608.76	-0.129134
838.43	118.007		702.09	-0.115678		654.4	1.28789		633.97	1.54317		609.43	-0.138654
839.43	119.574		702.77	-0.0454415		655.08	1.3311		634.61	1.5703		610.09	-0.148224
840.44	121.142		703.44	0.0272837		655.77	1.37392		635.26	1.5969		610.75	-0.157853
841.45	122.71		704.12	0.102569		656.45	1.41627		635.9	1.62289		611.4	-0.167531
842.46	124.274		704.8	0.180546		657.14	1.45802		636.55	1.64819		612.04	-0.177248
843.47	125.838		705.49	0.26115		657.83	1.49922		637.21	1.67283		612.68	-0.187006
844.47	127.4		706.2	0.344348		658.52	1.53983		637.87	1.6968		613.32	-0.196801
845.47	128.96		706.94	0.430207		659.22	1.57986		638.53	1.72009		613.96	-0.206636
846.48	130.519		707.69	0.518759		659.91	1.61936		639.19	1.74272		614.59	-0.216517
847.48	132.076		708.41	0.610067		660.58	1.65828		639.85	1.76467		615.23	-0.226444
848.48	133.631		709.1	0.704229		661.25	1.69659		640.5	1.78588		615.86	-0.236413
849.47	135.184		709.77	0.801182		661.91	1.73433		641.15	1.8064		616.5	-0.246428
850.47	136.736		710.42	0.900823		662.56	1.77154		641.81	1.82628		617.14	-0.256493
851.47	138.287		711.07	1.00317		663.22	1.80823		642.46	1.84552		617.78	-0.26661
852.46	139.839		711.7	1.10822		663.87	1.84445		643.12	1.86415		618.43	-0.276783
853.45	141.388		712.34	1.21611		664.52	1.88005		643.77	1.88205		619.07	-0.287
854.45	142.933		712.98	1.32712		665.18	1.91481		644.44	1.89905		619.72	-0.297239
855.44	144.472		713.63	1.44132		665.85	1.94864		645.1	1.91506		620.38	-0.307491
856.43	146.002		714.29	1.55889		666.52	1.98137		645.77	1.92997		621.04	-0.317741
857.41	147.523		714.97	1.67992		667.21	2.01295		646.45	1.94372		621.7	-0.327985
858.4	149.035		715.66	1.80443		667.91	2.0434		647.14	1.95632		622.35	-0.338225
859.38	150.536		716.31	1.93262		668.62	2.07254		647.81	1.96763		622.99	-0.348446
860.37	152.024		716.96	2.0647		669.31	2.10021		648.48	1.97751		623.63	-0.358634
861.35	153.498		717.59	2.20059		669.99	2.12646		649.15	1.98601		624.25	-0.368792
862.33	154.962		718.22	2.3402		670.66	2.15135		649.81	1.99318		624.88	-0.378927
863.32	156.414		718.84	2.48352		671.32	2.1749		650.46	1.99904		625.5	-0.389039
864.35	157.856		719.47	2.63047		671.97	2.19719		651.11	2.00366		626.11	-0.399137
865.38	159.286		720.1	2.78119		672.62	2.21808		651.76	2.00692		626.72	-0.409209
866.4	160.702		720.75	2.93596		673.27	2.23733		652.4	2.00863		627.34	-0.419231
867.43	162.102		721.41	3.09477		673.92	2.25495		653.04	2.00881		627.95	-0.429205
868.46	163.488		722.09	3.25765		674.58	2.2709		653.69	2.00741		628.59	-0.439127
869.48	164.859		722.8	3.42461		675.24	2.28526		654.33	2.00449		629.23	-0.449007
870.5	166.218		723.51	3.59551		675.9	2.29823		654.97	2.00019		629.86	-0.458869
871.52	167.565		724.19	3.77041		676.58	2.30984		655.62	1.99452		630.5	-0.468718
872.54	168.902		724.85	3.94933		677.25	2.32015		656.26	1.98753		631.13	-0.478565
873.56	170.228		725.51	4.13221		677.91	2.32927		656.91	1.97927		631.76	-0.48842
874.57	171.545		726.16	4.31901		678.58	2.3372		657.57	1.96978		632.38	-0.498285
875.59	172.853		726.8	4.50967		679.25	2.3441		658.22	1.95915		633.01	-0.508179
876.6	174.157		727.45	4.70408		679.91	2.35016		658.88	1.94753		633.63	-0.518123
877.61	175.453		728.11	4.90237		680.57	2.35527		659.53	1.9348		634.24	-0.528106
878.63	176.741		728.78	5.10473		681.23	2.35925		660.19	1.92085		634.86	-0.538114
879.63	178.018		729.46	5.31122		681.89	2.36208		660.84	1.90566		635.48	-0.548144
880.64	179.285		730.17	5.52193		682.56	2.36366		661.49	1.88912		636.09	-0.558186
881.65	180.542		730.89	5.73685		683.23	2.3641		662.14	1.87133		636.71	-0.568256
882.65	181.792		731.57	5.95581		683.9	2.36366		662.79	1.85247		637.34	-0.578384
883.66	183.036		732.23	6.1789		684.57	2.36231		663.44	1.83249		637.96	-0.588566
884.66	184.272		732.87	6.40618		685.24	2.36004		664.09	1.81141		638.59	-0.598806
885.66	185.5		733.5	6.63764		685.91	2.35685		664.74	1.78921		639.23	-0.609104
886.66	186.721		734.11	6.87336		686.58	2.35263		665.4	1.76581		639.87	-0.619447
887.66	187.933		734.73	7.11332		687.24	2.34741		666.06	1.74123		640.52	-0.629838
888.65	189.139		735.34	7.35749		687.9	2.34122		666.72	1.71551		641.18	-0.640282
889.65	190.336		735.95	7.60597		688.56	2.33398		667.37	1.68859		641.83	-0.650771
890.64	191.524		736.57	7.85883		689.21	2.32567		668.02	1.66042		642.48	-0.661305
891.64	192.703		737.2	8.11611		689.87	2.31621		668.67	1.63096		643.13	-0.671876
892.63	193.871		737.85	8.37789		690.53	2.30552		669.31	1.60016		643.77	-0.682475
893.62	195.031		738.5	8.64412		691.19	2.29374		669.95	1.56809		644.41	-0.693118
894.62	196.184		739.14	8.91469		691.83	2.28107		670.6	1.53491		645.04	-0.703832
895.62	197.331		739.76	9.18962		692.47	2.26758		671.25	1.50066		645.67	-0.714625
896.63	198.474		740.37	9.46885		693.1	2.25342		671.9	1.46544		646.29	-0.725516
897.64	199.613		740.97	9.75241		693.72	2.23856		672.55	1.42922		646.91	-0.736503
898.64	200.746		741.57	10.0404		694.34	2.2229		673.2	1.39194		647.53	-0.747574
899.65	201.876		742.17	10.3327		694.96	2.20655		673.85	1.35368		648.15	-0.758743
900.66	203.002		742.77	10.6293		695.58	2.1896		674.49	1.31449		648.77	-0.770022
901.66	204.123		743.38	10.9304		696.21	2.17188		675.14	1.27424		649.38	-0.781392
902.66	205.236		744.01	11.2363		696.84	2.15314		675.79	1.23274		649.99	-0.792831
903.67	206.338		744.64	11.547		697.47	2.13325		676.43	1.18987		650.6	-0.804324
904.67	207.427		745.31	11.8628		698.11	2.11191		677.08	1.14543		651.22	-0.815843
905.66	208.503		745.99	12.1839		698.76	2.08914		677.74	1.09941		651.83	-0.82739
906.69	209.565		746.66	12.51		699.41	2.06505		678.4	1.05187		652.44	-0.838979
907.75	210.613		747.31	12.8416		700.08	2.0394		679.06	1.00266		653.05	-0.850588
908.81	211.643		747.95	13.1786		700.74	2.01205		679.71	0.951623		653.65	-0.862201
909.86	212.656		748.58	13.5212		701.38	1.98299		680.36	0.898781		654.26	-0.87382
910.89	213.651		749.2	13.8694		702.01	1.9522		681.01	0.844109		654.86	-0.885443
911.92	214.629		749.82	14.2232		702.64	1.91967		681.64	0.7876		655.47	-0.89707
912.95	215.591		750.44	14.5826		703.26	1.88547		682.27	0.729301		656.08	-0.90871
913.98	216.532		751.07	14.9478		703.88	1.84939		682.9	0.669046		656.7	-0.920342
915	217.451		751.71	15.319		704.5	1.81112		683.52	0.606603		657.32	-0.931935
916.03	218.346		752.36	15.6964		705.12	1.77062		684.14	0.541926		657.94	-0.943486
917.05	219.215		753.03	16.0801		705.74	1.72775		684.75	0.474912		658.57	-0.95498
918.07	220.061		753.69	16.47		706.37	1.68263		685.37	0.405642		659.2	-0.966432
919.09	220.885		754.33	16.8659		707	1.63555		685.98	0.334335		659.83	-0.977877
920.11	221.69		754.96	17.268		707.64	1.58655		686.59	0.261003		660.46	-0.989321
921.13	222.476		755.58	17.676		708.29	1.53574		687.2	0.185723		661.09	-1.00078
922.15	223.243		756.19	18.0901		708.95	1.48317		687.82	0.108527		661.7	-1.01225
923.16	223.991		756.78	18.5103		709.61	1.42877		688.43	0.0293567		662.32	-1.02374
924.18	224.722		757.37	18.9366		710.25	1.37272		689.05	-0.0516488		662.93	-1.03526
925.22	225.439		757.96	19.3687		710.9	1.31523		689.66	-0.134346		663.53	-1.04684
926.28	226.138		758.54	19.8069		711.53	1.25607		690.29	-0.218913		664.14	-1.05846
927.34	226.816		759.13	20.2516		712.17	1.19495		690.91	-0.305578		664.74	-1.07008
928.41	227.472		759.73	20.7027		712.8	1.13174		691.54	-0.394436		665.35	-1.0817
929.49	228.101		760.33	21.1606		713.43	1.06617		692.17	-0.485697		665.96	-1.09328
930.57	228.706		760.95	21.6253		714.07	0.998368		692.8	-0.579281		666.57	-1.10484
931.65	229.29		761.57	22.0965		714.7	0.928627		693.42	-0.674966		667.19	-1.11642
932.72	229.851		762.18	22.5744		715.34	0.856788		694.04	-0.772881		667.82	-1.12801
933.8	230.388		762.78	23.0592		715.97	0.782777		694.66	-0.873089		668.45	-1.13958
934.86	230.903		763.36	23.5503		716.61	0.706921		695.28	-0.975315		669.08	-1.15113
935.93	231.396		763.94	24.0475		717.25	0.62955		695.89	-1.07926		669.71	-1.16262
936.99	231.871		764.51	24.5504		717.9	0.550985		696.5	-1.18467		670.35	-1.17402
938.05	232.331		765.09	25.0584		718.55	0.47172		697.1	-1.29112		670.99	-1.18532
939.11	232.774		765.66	25.5715		719.21	0.391791		697.71	-1.39858		671.62	-1.19649
940.17	233.199		766.25	26.0898		719.86	0.311096		698.32	-1.50712		672.25	-1.20751
941.23	233.607		766.84	26.6127		720.5	0.230026		698.94	-1.61641		672.88	-1.21835
942.28	234.001		767.44	27.14		721.13	0.148884		699.56	-1.72616		673.49	-1.22896
943.34	234.379		768.07	27.6715		721.75	0.0677583		700.18	-1.83634		674.1	-1.23936
944.39	234.746		768.72	28.2072		722.37	-0.0131784		700.8	-1.9468		674.71	-1.24955
945.44	235.1		769.37	28.747		722.98	-0.0938262		701.42	-2.05748		675.3	-1.25954
946.49	235.442		770.01	29.291		723.59	-0.174169		702.04	-2.16836		675.9	-1.26933
947.54	235.775		770.63	29.8386		724.19	-0.253787		702.66	-2.27909		676.48	-1.27888
948.59	236.1		771.23	30.3892		724.78	-0.332158		703.27	-2.38921		677.07	-1.28815
949.63	236.42		771.83	30.9426		725.38	-0.409061		703.89	-2.49856		677.65	-1.29712
950.67	236.735		772.43	31.4984		725.97	-0.484169		704.5	-2.60684		678.24	-1.30579
951.72	237.046		773.02	32.0568		726.56	-0.557605		705.11	-2.71417		678.82	-1.31414
952.8	237.347		773.62	32.6183		727.15	-0.629786		705.72	-2.8209		679.4	-1.32218
953.88	237.639		774.22	33.1829		727.75	-0.70067		706.33	-2.92697		679.98	-1.32988
954.96	237.92		774.84	33.7506		728.35	-0.770388		706.95	-3.0325		680.56	-1.33723
956.04	238.189		775.47	34.3214		728.96	-0.83889		707.57	-3.13745		681.15	-1.34422
957.13	238.449		776.09	34.8951		729.57	-0.905911		708.19	-3.24159		681.74	-1.35085
958.2	238.697		776.7	35.472		730.18	-0.971675		708.82	-3.34513		682.33	-1.35711
959.27	238.932		777.3	36.0523		730.79	-1.0364		709.45	-3.44823		682.92	-1.363
960.34	239.156		777.89	36.6355		731.4	-1.09958		710.07	-3.55048		683.53	-1.36849
961.41	239.372		778.49	37.2208		732.02	-1.16061		710.7	-3.65136		684.13	-1.37352
962.47	239.582		779.07	37.8078		732.63	-1.21915		711.34	-3.75057		684.75	-1.37807
963.53	239.79		779.65	38.3959		733.23	-1.27461		711.97	-3.84762		685.37	-1.38211
964.59	239.994		780.22	38.9851		733.83	-1.32706		712.6	-3.94256		685.99	-1.38563
965.65	240.192		780.78	39.5759		734.43	-1.37688		713.23	-4.0357		686.6	-1.38861
966.71	240.384		781.34	40.1678		735.02	-1.42366		713.86	-4.1267		687.2	-1.39103
967.77	240.572		781.9	40.7606		735.61	-1.46713		714.49	-4.21533		687.79	-1.39286
968.82	240.756		782.47	41.3543		736.2	-1.50742		715.11	-4.30171		688.38	-1.39412
969.87	240.935		783.05	41.9492		736.79	-1.54453		715.74	-4.38585		688.96	-1.39483
970.92	241.111		783.63	42.5455		737.38	-1.57861		716.36	-4.46791		689.54	-1.395
971.99	241.28		784.22	43.1436		737.98	-1.60997		716.99	-4.54815		690.11	-1.39467
973.06	241.444		784.81	43.7432		738.59	-1.63834		717.61	-4.62637		690.69	-1.39383
974.12	241.606		785.39	44.344		739.2	-1.66335		718.23	-4.70223		691.26	-1.39244
975.16	241.765		785.96	44.9461		739.81	-1.68509		718.85	-4.77583		691.83	-1.39052
976.21	241.921		786.52	45.5495		740.42	-1.70353		719.47	-4.84716		692.41	-1.3881
977.25	242.075		787.07	46.1543		741.04	-1.71861		720.09	-4.91618		692.98	-1.38515
978.29	242.225		787.62	46.7606		741.66	-1.73045		720.71	-4.98297		693.56	-1.38165
979.33	242.371		788.17	47.3681		742.29	-1.73891		721.33	-5.04742		694.14	-1.3776
980.38	242.513		788.72	47.9768		742.93	-1.74386		721.95	-5.10941		694.71	-1.37296
981.44	242.651		789.28	48.5868		743.57	-1.74542		722.57	-5.16905		695.29	-1.36775
982.49	242.784		789.85	49.1985		744.19	-1.74372		723.18	-5.2265		695.87	-1.36202
983.54	242.913		790.43	49.8119		744.81	-1.7388		723.8	-5.28177		696.47	-1.35575
984.59	243.036		791.03	50.4272		745.42	-1.73075		724.42	-5.33495		697.07	-1.34896
985.64	243.155		791.65	51.0439		746.03	-1.71913		725.05	-5.38568		697.67	-1.3416
986.68	243.274		792.28	51.6611		746.63	-1.70324		725.66	-5.43332		698.25	-1.33359
987.79	243.394		792.9	52.2784		747.23	-1.68278		726.27	-5.47765		698.83	-1.32493
988.9	243.518		793.49	52.8953		747.82	-1.65726		726.88	-5.51824		699.41	-1.31557
990.02	243.645		794.08	53.5116		748.42	-1.62648		727.48	-5.55491		699.99	-1.30549
991.14	243.776		794.66	54.1273		749.02	-1.59048		728.07	-5.5877		700.56	-1.29467
992.25	243.913		795.23	54.7419		749.62	-1.54871		728.66	-5.61614		701.13	-1.28307
993.36	244.058		795.8	55.3545		750.23	-1.50066		729.25	-5.63977		701.71	-1.27063
994.48	244.21		796.37	55.9656		750.84	-1.44647		729.84	-5.65875		702.28	-1.25738
995.59	244.368		796.96	56.5754		751.45	-1.38635		730.43	-5.67327		702.86	-1.24334
996.7	244.534		797.56	57.184		752.06	-1.32031		731.02	-5.68334		703.44	-1.22853
997.81	244.704		798.16	57.7919		752.67	-1.2486		731.61	-5.6892		704.02	-1.21296
998.91	244.882		798.74	58.3984		753.26	-1.17078		732.21	-5.69046		704.62	-1.19661
1000	245.071		799.32	59.0028		753.85	-1.08612		732.81	-5.68649		705.22	-1.1794
1001.1	245.271		799.89	59.605		754.43	-0.99463		733.41	-5.67732		705.81	-1.16133
1002.2	245.481		800.47	60.2051		755.01	-0.896179		734.01	-5.66284		706.41	-1.1424
1003.3	245.702		801.05	60.8031		755.58	-0.790957		734.61	-5.64321		707	-1.12261
1004.4	245.927		801.64	61.3999		756.15	-0.679575		735.21	-5.61895		707.58	-1.10198
1005.5	246.157		802.24	61.9955		756.71	-0.562074		735.81	-5.59008		708.17	-1.0805
1006.6	246.389		802.84	62.59		757.28	-0.43863		736.41	-5.55675		708.75	-1.05815
1007.7	246.622		803.44	63.184		757.85	-0.309496		737.02	-5.51919		709.34	-1.03495
1008.8	246.854		804.03	63.7775		758.42	-0.17474		737.61	-5.47746		709.92	-1.01091
1009.9	247.083		804.62	64.371		758.99	-0.0348054		738.2	-5.43193		710.51	-0.986045
1011	247.306		805.19	64.9652		759.57	0.1098		738.79	-5.38305		711.09	-0.960375
1012	247.524		805.76	65.5597		760.15	0.259423		739.37	-5.33051		711.68	-0.93387
1013.1	247.738		806.32	66.1538		760.74	0.414596		739.95	-5.27386		712.27	-0.906478
1014.3	247.95		806.89	66.7476		761.33	0.575392		740.53	-5.21304		712.86	-0.87819
1015.4	248.161		807.46	67.3406		761.91	0.74218		741.11	-5.14773		713.46	-0.848977
1016.5	248.368		808.03	67.9332		762.5	0.914608		741.69	-5.07824		714.06	-0.818844
1017.7	248.566		808.61	68.5263		763.07	1.09193		742.27	-5.00519		714.66	-0.78782
1018.8	248.756		809.21	69.1197		763.64	1.2743		742.86	-4.92846		715.26	-0.755883
1019.9	248.936		809.83	69.7136		764.21	1.46172		743.45	-4.84803		715.87	-0.723016
1021	249.106		810.48	70.3078		764.76	1.6542		744.04	-4.76391		716.46	-0.689223
1022.2	249.27		811.14	70.9021		765.32	1.85212		744.63	-4.67579		717.04	-0.654496
1023.3	249.426		811.79	71.4966		765.87	2.05538		745.21	-4.58377		717.62	-0.618837
1024.4	249.574		812.43	72.0915		766.44	2.26391		745.79	-4.48791		718.19	-0.582259
1025.6	249.715		813.06	72.6865		767.02	2.47792		746.37	-4.38803		718.76	-0.544741
1026.7	249.848		813.68	73.2816		767.61	2.69757		746.95	-4.28402		719.32	-0.50626
1027.8	249.976		814.31	73.8764		768.21	2.92304		747.53	-4.17571		719.88	-0.466811
1029	250.1		814.93	74.4708		768.81	3.15462		748.11	-4.06287		720.43	-0.426383
1030.1	250.216		815.56	75.0653		769.41	3.39193		748.69	-3.94583		720.98	-0.38498
1031.2	250.321		816.2	75.6605		770.01	3.63435		749.28	-3.82511		721.53	-0.342622
1032.3	250.413		816.85	76.2567		770.62	3.88172		749.86	-3.70083		722.08	-0.299303
1033.5	250.487		817.51	76.8543		771.21	4.13364		750.45	-3.57334		722.63	-0.255027
1034.6	250.545		818.15	77.4533		771.79	4.39018		751.04	-3.44258		723.18	-0.209792
1035.7	250.589		818.76	78.0535		772.37	4.65167		751.64	-3.30829		723.72	-0.163589
1036.8	250.617		819.35	78.6552		772.94	4.91779		752.24	-3.17075		724.27	-0.116426
1037.9	250.625		819.93	79.2587		773.52	5.18829		752.84	-3.03016		724.82	-0.0683098
1039	250.617		820.49	79.8634		774.09	5.46374		753.44	-2.88604		725.38	-0.0191963
1040.1	250.597		821.05	80.4685		774.67	5.74484		754.06	-2.7378		725.93	0.0309726
1041.3	250.567		821.6	81.0735		775.25	6.03208		754.67	-2.58502		726.49	0.082231
1042.4	250.532		822.15	81.6773		775.85	6.32629		755.28	-2.42699		727.06	0.134633
1043.5	250.491		822.72	82.28		776.45	6.6275		755.88	-2.26371		727.62	0.188195
1044.6	250.442		823.4	82.882		777.03	6.93541		756.48	-2.09542		728.19	0.242913
1045.7	250.388		824.09	83.4824		777.61	7.2507		757.07	-1.92153		728.76	0.298839
1046.8	250.331		824.79	84.0807		778.18	7.57389		757.66	-1.7416		729.33	0.356021
1047.9	250.272		825.49	84.6769		778.74	7.90498		758.25	-1.55566		729.9	0.414459
1049	250.211		826.2	85.271		779.3	8.24405		758.84	-1.36363		730.47	0.474154
1050.1	250.147		826.92	85.8629		779.86	8.59114		759.43	-1.16549		731.04	0.535115
1051.2	250.079		827.63	86.453		780.43	8.94608		760.02	-0.961388		731.61	0.597333
1052.3	250.011		828.34	87.0405		781	9.30951		760.61	-0.750771		732.17	0.660859
1053.3	249.947		829.04	87.6243		781.57	9.68236		761.2	-0.532864		732.73	0.725763
1054.4	249.888		829.73	88.2042		782.15	10.0648		761.78	-0.307503		733.29	0.792059
1055.5	249.837		830.4	88.7798		782.73	10.4573		762.35	-0.0743406		733.84	0.859777
1056.6	249.79		831.08	89.3515		783.32	10.8595		762.92	0.166344		734.39	0.928911
1057.8	249.741		831.76	89.9204		783.91	11.2705		763.48	0.413798		734.94	0.999419
1058.9	249.691		832.45	90.4866		784.49	11.6902		764.05	0.667985		735.49	1.07131
1060	249.635		833.14	91.0504		785.07	12.1185		764.61	0.928631		736.04	1.14459
1061.2	249.574		833.83	91.612		785.63	12.555		765.17	1.19563		736.59	1.21924
1062.4	249.507		834.51	92.1713		786.2	13.0001		765.72	1.46917		737.14	1.29529
1063.5	249.431		835.19	92.7289		786.76	13.4532		766.28	1.74879		737.69	1.37272
1064.7	249.342		835.87	93.2855		787.32	13.9137		766.85	2.034		738.25	1.4515
1065.8	249.244		836.56	93.8403		787.89	14.3824		767.41	2.32539		738.8	1.53169
1067	249.141		837.25	94.3922		788.46	14.8601		767.98	2.62373		739.36	1.61334
1068.1	249.035		837.96	94.941		789.03	15.3472		768.55	2.92935		739.92	1.69649
1069.3	248.932		838.72	95.4855		789.6	15.8447		769.13	3.24296		740.49	1.78121
1070.4	248.827		839.46	96.0262		790.17	16.352		769.7	3.56427		741.06	1.86747
1071.6	248.715		840.19	96.5641		790.74	16.8684		770.27	3.89253		741.63	1.95525
1072.7	248.6		840.92	97.0989		791.31	17.3944		770.85	4.22818		742.2	2.04458
1073.9	248.48		841.65	97.63		791.88	17.9302		771.42	4.57143		742.76	2.13548
1075	248.356		842.38	98.1581		792.46	18.4752		772	4.92168		743.33	2.22787
1076.1	248.23		843.06	98.6833		793.05	19.0289		772.57	5.27845		743.89	2.32162
1077.3	248.099		843.68	99.2061		793.65	19.5906		773.14	5.64113		744.45	2.41665
1078.4	247.962		844.27	99.7274		794.26	20.1593		773.7	6.00878		745.02	2.51281
1079.5	247.821		844.84	100.247		794.85	20.7351		774.26	6.38146		745.58	2.61008
1080.7	247.678		845.4	100.764		795.44	21.3185		774.81	6.7595		746.14	2.70849
1081.8	247.533		845.96	101.28		796.02	21.9087		775.36	7.14224		746.71	2.8079
1082.9	247.388		846.53	101.793		796.59	22.5053		775.91	7.52924		747.27	2.90821
1084.1	247.242		847.11	102.305		797.15	23.108		776.48	7.92031		747.84	3.00941
1085.2	247.09		847.72	102.817		797.71	23.7165		777.06	8.31504		748.41	3.11149
1086.3	246.933		848.33	103.327		798.26	24.3305		777.63	8.71328		748.98	3.21441
1087.5	246.769		848.91	103.837		798.81	24.95		778.19	9.11501		749.55	3.31821
1088.7	246.598		849.47	104.347		799.36	25.5743		778.75	9.5195		750.13	3.42274
1089.8	246.422		850.03	104.857		799.92	26.2024		779.31	9.92588		750.71	3.52783
1091	246.238		850.59	105.367		800.48	26.8339		779.86	10.3338		751.29	3.63343
1092.2	246.045		851.16	105.879		801.05	27.4681		780.42	10.7425		751.88	3.73944
1093.3	245.845		851.76	106.392		801.63	28.1055		780.98	11.1524		752.46	3.84591
1094.5	245.641		852.39	106.905		802.23	28.747		781.54	11.5645		753.03	3.95295
1095.6	245.434		853.08	107.417		802.85	29.3927		782.1	11.9787		753.59	4.06056
1096.8	245.226		853.81	107.928		803.45	30.0431		782.67	12.3954		754.13	4.16875
1098	245.017		854.5	108.439		804.05	30.698		783.25	12.8146		754.67	4.27754
1099.1	244.805		855.17	108.95		804.62	31.3571		783.83	13.2357		755.2	4.38684
1100.3	244.593		855.84	109.459		805.19	32.0207		784.42	13.6592		755.73	4.49674
1101.4	244.381		856.51	109.967		805.75	32.6896		785.01	14.0858		756.25	4.60731
1102.6	244.169		857.19	110.475		806.31	33.3627		785.6	14.5143		756.77	4.71837
1103.7	243.956		857.8	110.982		806.87	34.0389		786.17	14.944		757.28	4.82976
1104.9	243.743		858.38	111.49		807.43	34.7177		786.75	15.374		757.8	4.94135
1106	243.528		858.93	111.998		807.98	35.3978		787.31	15.8035		758.32	5.05298
1107.2	243.312		859.48	112.508		808.55	36.0797		787.88	16.2325		758.84	5.16466
1108.4	243.099		860.01	113.018		809.12	36.7641		788.44	16.662		759.36	5.27651
1109.5	242.887		860.55	113.528		809.7	37.4503		789	17.0912		759.89	5.3884
1110.7	242.678		861.09	114.039		810.3	38.138		789.56	17.5197		760.42	5.50025
1111.8	242.47		861.66	114.551		810.9	38.8274		790.12	17.9478		760.96	5.61212
1113	242.26		862.24	115.063		811.49	39.5184		790.68	18.3753		761.51	5.72403
1114.1	242.049		862.82	115.576		812.09	40.2112		791.24	18.8026		762.08	5.83607
1115.3	241.835		863.37	116.09		812.67	40.9066		791.8	19.2303		762.64	5.94834
1116.4	241.616		863.91	116.604		813.25	41.6038		792.36	19.6577		763.19	6.06077
1117.6	241.394		864.44	117.12		813.81	42.3024		792.93	20.0844		763.74	6.17326
1118.7	241.165		864.98	117.636		814.36	43.0024		793.49	20.5105		764.27	6.28585
1119.9	240.929		865.53	118.155		814.91	43.7038		794.07	20.9357		764.8	6.39856
1121	240.685		866.1	118.674		815.46	44.4064		794.65	21.3603		765.33	6.51138
1122.1	240.437		866.7	119.195		816	45.1107		795.23	21.7843		765.85	6.62433
1123.3	240.183		867.34	119.717		816.55	45.8166		795.82	22.2078		766.37	6.73739
1124.4	239.926		868.04	120.239		817.1	46.5239		796.42	22.6305		766.89	6.85049
1125.5	239.665		868.72	120.763		817.66	47.2329		797.02	23.0527		767.41	6.96371
1126.7	239.395		869.37	121.287		818.23	47.9436		797.6	23.4744		767.93	7.07712
1127.8	239.118		870.02	121.812		818.83	48.6562		798.18	23.8959		768.45	7.19075
1129	238.833		870.66	122.338		819.46	49.371		798.76	24.3173		768.98	7.30463
1130.1	238.541		871.32	122.865		820.1	50.0872		799.33	24.738		769.51	7.41862
1131.2	238.243		871.93	123.394		820.75	50.8036		799.89	25.1567		770.05	7.5325
1132.4	237.938		872.49	123.925		821.4	51.5196		800.45	25.5729		770.6	7.64617
1133.5	237.625		873.04	124.459		822.05	52.2344		801.01	25.9858		771.16	7.7595
1134.7	237.306		873.56	124.996		822.7	52.9476		801.57	26.3952		771.73	7.8724
1135.8	236.981		874.07	125.535		823.34	53.6596		802.12	26.8011		772.31	7.98491
1136.9	236.651		874.59	126.077		823.99	54.3692		802.67	27.2027		772.88	8.09684
1138.1	236.317		875.1	126.623		824.64	55.0757		803.22	27.5992		773.44	8.20803
1139.2	235.976		875.63	127.173		825.3	55.7793		803.77	27.9907		774.01	8.31854
1140.3	235.628		876.17	127.726		825.95	56.4803		804.32	28.3776		774.56	8.42848
1141.4	235.271		876.73	128.282		826.62	57.1789		804.87	28.76		775.12	8.53786
1142.6	234.905		877.28	128.842		827.29	57.8754		805.43	29.1383		775.67	8.64679
1143.7	234.528		877.8	129.405		827.97	58.569		805.98	29.5117		776.22	8.75513
1144.8	234.143		878.32	129.973		828.65	59.2587		806.54	29.8791		776.77	8.86264
1146	233.749		878.83	130.545		829.32	59.9443		807.11	30.2405		777.32	8.96934
1147.1	233.344		879.35	131.121		829.98	60.6256		807.67	30.5956		777.86	9.0752
1148.3	232.93		879.87	131.702		830.63	61.3032		808.25	30.945		778.4	9.18029
1149.5	232.509		880.41	132.286		831.28	61.9784		808.83	31.2898		778.95	9.28479
1150.6	232.083		880.98	132.872		831.93	62.6513		809.41	31.6302		779.49	9.38873
1151.7	231.653		881.58	133.461		832.57	63.3227		810.01	31.9667		780.03	9.49214
1152.9	231.221		882.24	134.051		833.22	63.9929		810.6	32.2997		780.57	9.59511
1154.1	230.784		882.91	134.644		833.87	64.6622		811.19	32.6294		781.11	9.6977
1155.3	230.345		883.54	135.237		834.53	65.3315		811.77	32.9567		781.66	9.80003
1156.5	229.905		884.16	135.83		835.2	66.002		812.34	33.2825		782.2	9.90228
1157.6	229.465		884.79	136.424		835.86	66.6731		812.91	33.6065		782.74	10.0043
1158.8	229.024		885.42	137.019		836.51	67.3439		813.47	33.9276		783.29	10.106
1160	228.582		886.02	137.615		837.15	68.0142		814.03	34.2457		783.84	10.2074
1161.2	228.14		886.58	138.212		837.78	68.6835		814.59	34.5604		784.38	10.3082
1162.4	227.699		887.11	138.81		838.41	69.3525		815.14	34.8722		784.91	10.4087
1163.6	227.262		887.62	139.407		839.05	70.023		815.69	35.1827		785.43	10.509
1164.9	226.829		888.12	140.004		839.7	70.6947		816.24	35.4918		785.95	10.6092
1166.1	226.402		888.69	140.599		840.37	71.3678		816.79	35.7994		786.46	10.7091
1167.3	225.979		889.47	141.195		841.05	72.0422		817.34	36.1055		786.96	10.8089
1168.5	225.559		890.3	141.79		841.74	72.7173		817.89	36.4096		787.47	10.9084
1169.7	225.141		891.12	142.384		842.43	73.3931		818.44	36.7117		787.96	11.0077
1170.9	224.724		891.9	142.979		843.1	74.07		818.99	37.0121		788.46	11.1068
1172.1	224.309		892.67	143.573		843.76	74.7475		819.55	37.3104		788.96	11.2057
1173.4	223.895		893.43	144.167		844.41	75.4254		820.11	37.6064		789.46	11.3043
1174.6	223.482		894.2	144.761		845.05	76.1035		820.67	37.8997		789.96	11.4026
1175.8	223.068		894.98	145.356		845.7	76.7811		821.23	38.19		790.47	11.5004
1177	222.656		895.79	145.951		846.36	77.4592		821.8	38.4779		790.98	11.598
1178.2	222.247		896.63	146.545		847.03	78.1391		822.38	38.7647		791.49	11.6956
1179.4	221.843		897.51	147.137		847.72	78.8214		822.96	39.0508		792.01	11.7931
1180.6	221.447		898.39	147.726		848.42	79.5069		823.55	39.3372		792.55	11.8906
1181.8	221.057		899.25	148.313		849.12	80.1957		824.13	39.6236		793.09	11.9883
1183	220.672		900.1	148.898		849.81	80.8869		824.71	39.9094		793.63	12.086
1184.2	220.293		900.96	149.481		850.51	81.5814		825.29	40.1954		794.16	12.1838
1185.4	219.921		901.81	150.06		851.2	82.2797		825.88	40.4821		794.69	12.2818
1186.6	219.555		902.67	150.637		851.9	82.9809		826.47	40.7684		795.21	12.3798
1187.8	219.195		903.52	151.213		852.59	83.6837		827.07	41.0533		795.72	12.4776
1189	218.841		904.37	151.787		853.29	84.3871		827.67	41.3358		796.23	12.5751
1190.2	218.49		905.22	152.362		853.99	85.0895		828.26	41.6144		796.73	12.672
1191.5	218.143		906.03	152.937		854.69	85.7911		828.85	41.8893		797.23	12.7683
1192.7	217.803		906.82	153.511		855.36	86.4926		829.43	42.161		797.73	12.8641
1193.9	217.468		907.59	154.086		856.05	87.1927		830.01	42.4285		798.23	12.9592
1195.1	217.138		908.36	154.66		856.76	87.8906		830.58	42.6907		798.74	13.0535
1196.4	216.814		909.14	155.236		857.45	88.5862		831.16	42.9479		799.24	13.1469
1197.6	216.494		909.93	155.812		858.11	89.2795		831.73	43.1998		799.75	13.2395
1198.8	216.178		910.74	156.389		858.76	89.9705		832.31	43.4464		800.26	13.3312
1200	215.867		911.59	156.967		859.39	90.6595		832.89	43.6882		800.77	13.4221
1201.2	215.559		912.4	157.546		860.03	91.3454		833.47	43.9239		801.3	13.5121
1202.4	215.255		913.19	158.126		860.66	92.0265		834.05	44.1521		801.83	13.6007
1203.6	214.953		913.96	158.71		861.29	92.7025		834.63	44.3723		802.37	13.6881
1204.8	214.653		914.73	159.296		861.9	93.3725		835.2	44.5839		802.93	13.7741
1206	214.356		915.51	159.884		862.5	94.0375		835.78	44.7876		803.49	13.8587
1207.2	214.065		916.3	160.474		863.11	94.6993		836.35	44.9851		804.05	13.9423
1208.4	213.781		917.13	161.064		863.73	95.3581		836.92	45.1766		804.61	14.0248
1209.6	213.505		917.99	161.654		864.38	96.0147		837.5	45.3627		805.16	14.1065
1210.8	213.238		918.85	162.243		865.06	96.6694		838.09	45.5439		805.71	14.1872
1212	212.979		919.71	162.833		865.72	97.3219		838.68	45.7196		806.26	14.2671
1213.2	212.73		920.57	163.421		866.37	97.9733		839.28	45.8909		806.81	14.3462
1214.5	212.493		921.43	164.008		867.02	98.625		839.89	46.0592		807.35	14.4247
1215.7	212.266		922.29	164.593		867.66	99.2756		840.5	46.223		807.9	14.5024
1216.9	212.05		923.15	165.178		868.31	99.9234		841.12	46.3809		808.44	14.5791
1218.1	211.842		924	165.763		868.98	100.568		841.74	46.5321		808.98	14.6546
1219.3	211.643		924.84	166.35		869.65	101.207		842.36	46.6753		809.51	14.7287
1220.5	211.452		925.68	166.938		870.33	101.842		842.97	46.8111		810.05	14.8015
1221.8	211.274		926.51	167.525		871.01	102.475		843.56	46.9412		810.59	14.8732
1223	211.107		927.32	168.111		871.71	103.105		844.15	47.0648		811.12	14.9438
1224.3	210.952		928.11	168.698		872.41	103.731		844.74	47.1815		811.66	15.0131
1225.6	210.807		928.89	169.285		873.12	104.354		845.32	47.2926		812.21	15.0816
1226.8	210.67		929.66	169.871		873.82	104.974		845.92	47.3991		812.76	15.1499
1228.1	210.542		930.45	170.457		874.44	105.591		846.53	47.5023		813.32	15.2184
1229.3	210.42		931.25	171.042		875.06	106.208		847.12	47.6044		813.88	15.2877
1230.5	210.305		932.09	171.625		875.66	106.823		847.68	47.705		814.42	15.3579
1231.8	210.194		932.93	172.209		876.24	107.436		848.22	47.8037		814.96	15.4291
1233	210.087		933.74	172.792		876.83	108.047		848.75	47.9019		815.48	15.5017
1234.2	209.982		934.52	173.375		877.43	108.656		849.29	48.0004		815.99	15.5763
1235.4	209.878		935.3	173.957		878.04	109.263		849.83	48.0997		816.52	15.6529
1236.6	209.779		936.07	174.537		878.7	109.87		850.4	48.2009		817.07	15.7318
1237.9	209.684		936.86	175.116		879.36	110.477		850.99	48.3044		817.62	15.813
1239.1	209.593		937.67	175.693		880	111.084		851.59	48.4102		818.16	15.8966
1240.3	209.507		938.52	176.268		880.64	111.692		852.17	48.52		818.71	15.9832
1241.5	209.42		939.39	176.84		881.28	112.3		852.72	48.6355		819.25	16.0736
1242.7	209.335		940.26	177.41		881.94	112.91		853.27	48.7577		819.79	16.168
1243.9	209.251		941.13	177.976		882.61	113.523		853.8	48.8879		820.33	16.267
1245.2	209.167		941.99	178.54		883.28	114.137		854.33	49.0256		820.87	16.3703
1246.4	209.084		942.86	179.102		883.94	114.752		854.86	49.1688		821.42	16.4775
1247.7	209.001		943.72	179.662		884.6	115.367		855.4	49.3177		821.96	16.5887
1248.9	208.918		944.59	180.22		885.28	115.981		855.94	49.4713		822.51	16.7038
1250.2	208.835		945.45	180.777		885.97	116.595		856.5	49.6301		823.06	16.8229
1251.4	208.753		946.31	181.332		886.66	117.209		857.05	49.795		823.61	16.9462
1252.6	208.671		947.17	181.886		887.35	117.822		857.6	49.9651		824.17	17.0736
1253.9	208.59		948	182.439		888.01	118.433		858.15	50.1395		824.73	17.2048
1255.1	208.508		948.8	182.99		888.63	119.044		858.72	50.3199		825.29	17.3406
1256.3	208.424		949.58	183.539		889.22	119.655		859.3	50.5088		825.85	17.4817
1257.6	208.336		950.36	184.086		889.8	120.267		859.84	50.7072		826.42	17.6286
1258.8	208.242		951.14	184.63		890.36	120.881		860.36	50.9176		826.98	17.7823
1260	208.143		951.94	185.172		890.93	121.496		860.87	51.1394		827.54	17.9427
1261.2	208.039		952.76	185.712		891.51	122.111		861.37	51.3711		828.11	18.1092
1262.5	207.928		953.61	186.25		892.12	122.726		861.87	51.6142		828.67	18.2826
1263.7	207.81		954.44	186.787		892.76	123.342		862.38	51.8694		829.23	18.4632
1264.9	207.686		955.23	187.321		893.39	123.959		862.92	52.1366		829.79	18.6508
1266.1	207.557		956.01	187.853		894.02	124.578		863.48	52.4159		830.36	18.8453
1267.4	207.425		956.79	188.381		894.63	125.197		864.07	52.7069		830.92	19.0466
1268.6	207.293		957.58	188.906		895.26	125.818		864.63	53.0085		831.48	19.2541
1269.9	207.159		958.38	189.429		895.9	126.441		865.19	53.3218		832.04	19.4683
1271.2	207.023		959.21	189.947		896.55	127.065		865.74	53.6482		832.6	19.6897
1272.4	206.886		960.09	190.461		897.19	127.693		866.31	53.9875		833.16	19.9181
1273.7	206.75		960.97	190.971		897.84	128.323		866.87	54.34		833.72	20.1535
1275	206.614		961.86	191.477		898.48	128.955		867.44	54.7058		834.27	20.3961
1276.3	206.479		962.74	191.979		899.13	129.59		868	55.0843		834.82	20.6458
1277.6	206.342		963.63	192.476		899.8	130.227		868.56	55.476		835.37	20.9027
1278.9	206.205		964.51	192.97		900.45	130.866		869.09	55.8811		835.92	21.1671
1280.2	206.067		965.41	193.46		901.11	131.506		869.61	56.2995		836.47	21.4389
1281.4	205.932		966.31	193.945		901.76	132.15		870.13	56.7308		837.02	21.7177
1282.7	205.801		967.2	194.426		902.37	132.795		870.65	57.1749		837.57	22.0035
1284	205.673		968.09	194.902		902.95	133.442		871.18	57.6315		838.12	22.2963
1285.2	205.547		968.93	195.373		903.51	134.092		871.72	58.1022		838.68	22.5966
1286.5	205.42		969.73	195.839		904.06	134.746		872.24	58.5893		839.23	22.9056
1287.8	205.292		970.52	196.3		904.6	135.403		872.73	59.0941		839.79	23.2235
1289.1	205.16		971.29	196.755		905.16	136.064		873.21	59.6183		840.35	23.5513
1290.4	205.025		972.07	197.205		905.73	136.73		873.68	60.1625		840.91	23.8891
1291.6	204.885		972.87	197.649		906.32	137.4		874.15	60.7267		841.48	24.237
1292.9	204.74		973.69	198.088		906.95	138.075		874.63	61.3126		842.06	24.5957
1294.2	204.586		974.54	198.522		907.56	138.755		875.12	61.9222		842.63	24.9661
1295.4	204.425		975.37	198.949		908.16	139.44		875.63	62.5549		843.18	25.3479
1296.7	204.261		976.17	199.37		908.76	140.13		876.17	63.2102		843.73	25.7407
1297.9	204.092		976.95	199.784		909.37	140.826		876.72	63.8882		844.28	26.1447
1299.2	203.923		977.73	200.192		910	141.527		877.25	64.588		844.82	26.5593
1300.4	203.75		978.51	200.593		910.62	142.235		877.77	65.3113		845.35	26.9852
1301.7	203.571		979.31	200.987		911.24	142.948		878.29	66.0606		845.88	27.4236
1302.9	203.387		980.13	201.374		911.86	143.669		878.83	66.8358		846.4	27.8743
1304.2	203.199		981	201.753		912.48	144.396		879.4	67.6377		846.92	28.3377
1305.4	203.005		981.89	202.125		913.1	145.13		880.01	68.4653		847.44	28.8134
1306.7	202.808		982.79	202.49		913.73	145.869		880.64	69.3161		847.96	29.3006
1307.9	202.607		983.69	202.849		914.38	146.612		881.25	70.19		848.48	29.7994
1309.1	202.402		984.6	203.203		915.02	147.359		881.86	71.0858		849	30.3097
1310.4	202.193		985.51	203.55		915.65	148.108		882.45	72.0029		849.51	30.8309
1311.7	201.983		986.42	203.892		916.24	148.862		883.04	72.9408		850.03	31.3631
1313.1	201.772		987.31	204.229		916.8	149.617		883.64	73.898		850.55	31.9057
1314.5	201.562		988.21	204.561		917.34	150.373		884.23	74.8722		851.07	32.4579
1315.9	201.35		989.1	204.887		917.87	151.13		884.84	75.8649		851.59	33.0204
1317.3	201.136		989.94	205.209		918.45	151.89		885.46	76.8778		852.11	33.5939
1318.7	200.919		990.75	205.525		919.07	152.651		886.09	77.9113		852.64	34.1786
1320.1	200.699		991.53	205.836		919.71	153.415		886.73	78.9666		853.17	34.7748
1321.5	200.475		992.3	206.142		920.35	154.18		887.35	80.0424		853.71	35.3824
1322.9	200.25		993.08	206.444		920.97	154.945		887.96	81.1355		854.25	36.0001
1324.2	200.022		993.87	206.741		921.6	155.709		888.58	82.2466		854.8	36.6284
1325.6	199.792		994.68	207.035		922.22	156.473		889.2	83.3754		855.36	37.2673
1327	199.56		995.53	207.324		922.85	157.236		889.83	84.522		855.91	37.9167
1328.5	199.326		996.36	207.609		923.46	158		890.47	85.6882		856.45	38.5772
1329.9	199.092		997.16	207.888		924.07	158.764		891.11	86.8735		856.99	39.2486
1331.3	198.858		997.94	208.163		924.67	159.529		891.76	88.0777		857.52	39.9309
1332.8	198.624		998.71	208.432		925.26	160.294		892.4	89.3017		858.08	40.6243
1334.2	198.39		999.49	208.696		925.85	161.059		893.05	90.5458		858.67	41.3291
1335.7	198.155		1000.3	208.954		926.44	161.826		893.71	91.811		859.27	42.0456
1337.2	197.921		1001.1	209.206		927.03	162.595		894.38	93.0984		859.85	42.7741
1338.8	197.687		1002	209.452		927.62	163.364		895.05	94.4063		860.43	43.5141
1340.2	197.454		1002.8	209.694		928.22	164.133		895.72	95.7322		861	44.265
1341.6	197.223		1003.7	209.931		928.82	164.899		896.39	97.0755		861.56	45.0264
1343.2	196.995		1004.6	210.164		929.39	165.664		897.05	98.4344		862.12	45.798
1344.7	196.769		1005.5	210.394		929.95	166.425		897.69	99.8091		862.67	46.5798
1346.3	196.546		1006.4	210.618		930.51	167.185		898.34	101.201		863.24	47.3722
1347.7	196.326		1007.3	210.838		931.07	167.943		898.99	102.609		863.81	48.1749
1349.1	196.112		1008.2	211.054		931.66	168.697		899.64	104.032		864.43	48.9875
1350.7	195.9		1009.1	211.265		932.27	169.449		900.31	105.472		865.04	49.8108
1352.2	195.689		1009.9	211.472		932.88	170.2		900.99	106.932		865.65	50.6459
1353.7	195.479		1010.8	211.673		933.5	170.95		901.67	108.413		866.25	51.4934
1355.2	195.266		1011.6	211.868		934.11	171.701		902.33	109.919		866.85	52.3546
1356.7	195.052		1012.4	212.056		934.71	172.453		902.99	111.45		867.44	53.2295
1358.3	194.836		1013.1	212.24		935.3	173.204		903.65	113.004		868.04	54.1177
1359.8	194.617		1013.9	212.417		935.9	173.957		904.3	114.584		868.63	55.0202
1361.4	194.393		1014.7	212.588		936.49	174.71		904.96	116.192		869.22	55.9378
1363.1	194.164		1015.5	212.752		937.09	175.465		905.62	117.828		869.81	56.8705
1364.8	193.932		1016.3	212.91		937.67	176.222		906.26	119.492		870.41	57.8183
1366.5	193.697		1017.2	213.06		938.24	176.98		906.9	121.184		871	58.7815
1368.1	193.459		1018	213.204		938.81	177.74		907.54	122.904		871.61	59.7597
1369.7	193.217		1018.7	213.341		939.37	178.501		908.17	124.654		872.22	60.7538
1371.2	192.968		1019.5	213.47		939.93	179.266		908.79	126.438		872.83	61.7653
1372.9	192.712		1020.3	213.591		940.49	180.035		909.43	128.256		873.45	62.7943
1374.6	192.449		1021	213.703		941.05	180.809		910.09	130.11		874.09	63.8415
1376.3	192.179		1021.8	213.808		941.61	181.586		910.75	131.999		874.73	64.9065
1378	191.905		1022.7	213.905		942.15	182.365		911.41	133.918		875.38	65.988
1379.7	191.626		1023.5	213.995		942.68	183.146		912.08	135.868		876.04	67.0861
1381.5	191.343		1024.4	214.078		943.21	183.926		912.76	137.847		876.7	68.2004
1383.2	191.056		1025.2	214.155		943.75	184.707		913.44	139.856		877.36	69.3307
1385	190.766		1026	214.225		944.3	185.488		914.11	141.894		878.01	70.4773
1386.7	190.474		1026.9	214.289		944.88	186.269		914.76	143.96		878.67	71.6396
1388.5	190.181		1027.8	214.347		945.45	187.047		915.41	146.05		879.31	72.8168
1390.2	189.885		1028.7	214.399		946.03	187.824		916.05	148.169		879.96	74.0099
1392	189.585		1029.5	214.445		946.61	188.601		916.68	150.319		880.6	75.2202
1393.7	189.28		1030.3	214.482		947.18	189.38		917.31	152.502		881.23	76.4482
1395.4	188.967		1031.2	214.512		947.75	190.16		917.95	154.721		881.87	77.6952
1397.2	188.648		1032	214.535		948.33	190.942		918.61	156.974		882.51	78.9606
1398.9	188.325		1032.8	214.551		948.9	191.724		919.26	159.259		883.15	80.2434
1400.5	187.995		1033.5	214.56		949.47	192.506		919.91	161.576		883.78	81.5443
1402.2	187.66		1034.3	214.561		950.04	193.288		920.56	163.928		884.39	82.8636
1404	187.32		1035.1	214.556		950.59	194.07		921.21	166.31		885	84.2005
1405.9	186.975		1035.8	214.544		951.13	194.853		921.87	168.72		885.61	85.5543
1407.8	186.626		1036.6	214.527		951.67	195.635		922.52	171.157		886.22	86.9239
1409.6	186.276		1037.4	214.503		952.21	196.417		923.18	173.614		886.83	88.3081
1411.5	185.924		1038.3	214.475		952.76	197.198		923.87	176.092		887.39	89.7068
1413.6	185.568		1039	214.44		953.3	197.98		924.55	178.593		887.94	91.1208
1415.4	185.21		1039.8	214.4		953.83	198.761		925.24	181.114		888.49	92.549
1417.2	184.85		1040.6	214.355		954.36	199.544		925.93	183.651		889.05	93.9908
1419.1	184.488		1041.3	214.305		954.88	200.327		926.62	186.204		889.63	95.4459
1421.1	184.126		1042.1	214.251		955.38	201.108		927.31	188.772		890.22	96.9136
1423.2	183.764		1042.9	214.192		955.88	201.888		928.01	191.353		890.78	98.3939
1425.2	183.401		1043.7	214.129		956.39	202.667		928.7	193.946		891.34	99.8867
1427.3	183.039		1044.5	214.063		956.91	203.443		929.39	196.55		891.89	101.391
1429.3	182.679		1045.3	213.993		957.44	204.218		930.08	199.158		892.44	102.905
1431.2	182.322		1046	213.921		957.98	204.99		930.8	201.77		893.01	104.429
1433.2	181.969		1046.8	213.846		958.52	205.759		931.52	204.382		893.63	105.961
1435.1	181.618		1047.6	213.769		959.06	206.526		932.25	206.996		894.27	107.503
1437.1	181.268		1048.4	213.689		959.6	207.292		932.98	209.616		894.91	109.055
1439	180.919		1049.2	213.605		960.14	208.056		933.71	212.241		895.56	110.618
1441	180.569		1050	213.518		960.68	208.819		934.44	214.874		896.21	112.192
1442.9	180.219		1050.7	213.427		961.22	209.582		935.17	217.513		896.86	113.778
1444.9	179.87		1051.5	213.334		961.76	210.343		935.89	220.158		897.51	115.374
1446.8	179.519		1052.3	213.237		962.3	211.103		936.59	222.809		898.17	116.982
1448.8	179.167		1053.1	213.136		962.83	211.863		937.26	225.469		898.83	118.602
1450.7	178.814		1053.9	213.032		963.37	212.622		937.93	228.134		899.49	120.233
1453	178.462		1054.6	212.926		963.89	213.379		938.63	230.798		900.14	121.873
1455.4	178.112		1055.3	212.818		964.42	214.136		939.36	233.459		900.79	123.521
1457.5	177.765		1056.1	212.709		964.94	214.89		940.08	236.112		901.44	125.177
1460	177.421		1056.9	212.598		965.46	215.643		940.81	238.757		902.08	126.84
1462.1	177.077		1057.6	212.485		965.98	216.394		941.53	241.398		902.73	128.511
1464.3	176.735		1058.4	212.371		966.5	217.145		942.25	244.031		903.37	130.19
1466.4	176.395		1059.2	212.256		967.01	217.895		942.97	246.656		904	131.876
1468.6	176.057		1059.9	212.14		967.52	218.643		943.69	249.272		904.64	133.569
1470.8	175.722		1060.6	212.022		968.03	219.389		944.41	251.879		905.27	135.27
1472.9	175.389		1061.4	211.903		968.54	220.133		945.13	254.479		905.91	136.978
1475.1	175.058		1062.1	211.783		969.05	220.874		945.85	257.074		906.53	138.696
1477.3	174.73		1062.9	211.662		969.56	221.611		946.57	259.661		907.16	140.421
1479.4	174.405		1063.6	211.541		970.07	222.346		947.3	262.239		907.78	142.153
1481.6	174.083		1064.3	211.418		970.57	223.076		948.03	264.807		908.39	143.892
1484	173.766		1065.1	211.296		971.08	223.802		948.77	267.364		909.01	145.639
1486.6	173.453		1065.8	211.173		971.59	224.524		949.51	269.912		909.63	147.393
1489.2	173.142		1066.5	211.05		972.1	225.241		950.24	272.45		910.25	149.155
1491.8	172.835		1067.3	210.926		972.6	225.955		950.98	274.978		910.87	150.924
1494.4	172.53		1068	210.802		973.11	226.665		951.73	277.496		911.5	152.701
1497	172.228		1068.7	210.677		973.61	227.371		952.47	280.003		912.13	154.485
1499.6	171.93		1069.4	210.552		974.11	228.072		953.21	282.501		912.77	156.278
1502.2	171.634		1070.1	210.427		974.61	228.768		953.95	284.991		913.42	158.079
1504.8	171.34		1070.9	210.301		975.11	229.46		954.69	287.473		914.08	159.888
1507.4	171.05		1071.6	210.176		975.61	230.146		955.43	289.943		914.75	161.705
1510	170.765		1072.3	210.051		976.11	230.827		956.17	292.397		915.42	163.528
1512.6	170.484		1073.1	209.928		976.6	231.503		956.91	294.83		916.1	165.356
1515.2	170.21		1073.8	209.806		977.09	232.173		957.64	297.24		916.76	167.188
1517.8	169.942		1074.5	209.687		977.58	232.837		958.38	299.624		917.43	169.024
1520.4	169.68		1075.2	209.569		978.07	233.496		959.12	301.983		918.1	170.863
1523	169.425		1075.9	209.455		978.55	234.149		959.86	304.313		918.77	172.704
1525.6	169.177		1076.6	209.343		979.04	234.796		960.59	306.609		919.44	174.547
1528.1	168.936		1077.3	209.235		979.52	235.438		961.33	308.872		920.12	176.391
1530.7	168.703		1078	209.13		980.01	236.073		962.06	311.105		920.79	178.237
1533.1	168.478		1078.7	209.027		980.49	236.701		962.8	313.307		921.46	180.086
1535.6	168.259		1079.4	208.928		980.97	237.322		963.53	315.48		922.13	181.937
1538	168.048		1080.1	208.833		981.46	237.935		964.26	317.62		922.8	183.791
1540.5	167.847		1080.8	208.741		981.94	238.541		964.99	319.722		923.47	185.644
1542.8	167.654		1081.5	208.655		982.42	239.14		965.72	321.786		924.07	187.498
1545.2	167.471		1082.2	208.572		982.91	239.73		966.45	323.81		924.65	189.351
1547.6	167.297		1082.9	208.494		983.4	240.312		967.19	325.797		925.3	191.205
1549.9	167.129		1083.5	208.42		983.88	240.887		967.92	327.752		925.99	193.062
1552.2	166.969		1084.2	208.348		984.37	241.456		968.65	329.676		926.69	194.922
1554.5	166.813		1084.9	208.279		984.85	242.019		969.38	331.57		927.37	196.785
1556.8	166.663		1085.5	208.213		985.33	242.577		970.11	333.438		928.08	198.653
1559	166.518		1086.2	208.149		985.82	243.128		970.85	335.28		928.78	200.525
1561.2	166.377		1086.9	208.086		986.3	243.674		971.58	337.099		929.49	202.404
1563.5	166.238		1087.6	208.025		986.78	244.214		972.32	338.902		930.19	204.291
1565.7	166.101		1088.3	207.964		987.25	244.75		973.05	340.684		930.89	206.185
1567.8	165.969		1089	207.906		987.73	245.281		973.78	342.442		931.59	208.085
1570.2	165.841		1089.6	207.849		988.2	245.806		974.5	344.175		932.29	209.99
1572.8	165.717		1090.3	207.796		988.67	246.325		975.24	345.88		932.99	211.9
1575.4	165.596		1090.9	207.744		989.13	246.84		975.97	347.56		933.68	213.816
1578	165.477		1091.6	207.692		989.6	247.351		976.71	349.222		934.36	215.741
1580.6	165.36		1092.3	207.642		990.06	247.857		977.44	350.866		935.01	217.673
1583.2	165.243		1092.9	207.592		990.51	248.36		978.17	352.491		935.62	219.614
1585.8	165.128		1093.6	207.543		990.97	248.859		978.9	354.098		936.23	221.564
1588.4	165.016		1094.2	207.496		991.42	249.354		979.64	355.682		936.89	223.521
1591	164.905		1094.9	207.45		991.88	249.843		980.39	357.246		937.6	225.485
1593.6	164.797		1095.5	207.405		992.33	250.327		981.14	358.789		938.31	227.458
1596.3	164.69		1096.2	207.362		992.78	250.806		981.89	360.309		939.02	229.438
1598.9	164.587		1096.9	207.321		993.23	251.279		982.64	361.806		939.73	231.425
1601.5	164.486		1097.5	207.282		993.68	251.746		983.39	363.278		940.44	233.419
1604.1	164.39		1098.2	207.246		994.13	252.207		984.13	364.723		941.15	235.42
1606.7	164.295		1098.8	207.212		994.58	252.662		984.87	366.143		941.85	237.428
1609.3	164.202		1099.4	207.179		995.04	253.112		985.62	367.546		942.54	239.445
1611.9	164.109		1100	207.147		995.49	253.557		986.36	368.932		943.23	241.472
1614.5	164.014		1100.7	207.115		995.95	253.999		987.09	370.306		943.92	243.511
1617.1	163.918		1101.3	207.082		996.41	254.436		987.82	371.667		944.6	245.561
1619.7	163.823		1102	207.051		996.87	254.869		988.56	373.012		945.28	247.622
1622.3	163.726		1102.7	207.02		997.33	255.298		989.29	374.344		945.94	249.695
1624.9	163.628		1103.3	206.988		997.79	255.722		990.02	375.666		946.59	251.78
1627.5	163.528		1103.9	206.957		998.25	256.142		990.75	376.972		947.24	253.876
1630.1	163.429		1104.5	206.928		998.71	256.556		991.48	378.258		947.89	255.982
1632.7	163.332		1105.1	206.901		999.18	256.965		992.21	379.517		948.53	258.095
1635.3	163.238		1105.7	206.878		999.64	257.368		992.94	380.744		949.17	260.214
1638	163.147		1106.4	206.858		1000.1	257.765		993.67	381.938		949.82	262.34
1640.6	163.057		1107	206.84		1000.5	258.155		994.4	383.103		950.46	264.472
1643.2	162.971		1107.6	206.827		1001	258.54		995.13	384.231		951.11	266.609
1645.8	162.889		1108.3	206.819		1001.5	258.918		995.85	385.32		951.76	268.75
1648.4	162.811		1108.9	206.815		1001.9	259.289		996.58	386.368		952.42	270.896
1651	162.737		1109.5	206.815		1002.3	259.653		997.3	387.376		953.09	273.045
1653.6	162.668		1110.1	206.821		1002.8	260.01		998.03	388.343		953.77	275.198
1656.2	162.602		1110.7	206.831		1003.2	260.36		998.76	389.271		954.46	277.356
1658.8	162.541		1111.4	206.847		1003.7	260.702		999.53	390.154		955.16	279.517
1661.4	162.486		1112	206.87		1004.1	261.036		1000.3	390.984		955.86	281.678
1664	162.439		1112.6	206.9		1004.5	261.361		1001.1	391.759		956.54	283.839
1666.6	162.399		1113.2	206.937		1004.9	261.678		1001.8	392.477		957.23	286
1669.2	162.367		1113.8	206.982		1005.4	261.985		1002.6	393.14		957.93	288.16
1671.8	162.338		1114.4	207.033		1005.8	262.285		1003.4	393.757		958.63	290.324
1674.4	162.314		1115	207.089		1006.2	262.578		1004.1	394.327		959.34	292.49
1677	162.293		1115.6	207.15		1006.6	262.863		1004.9	394.855		960.05	294.662
1679.6	162.275		1116.2	207.217		1007.1	263.142		1005.6	395.342		960.75	296.838
1682.2	162.259		1116.8	207.288		1007.5	263.414		1006.4	395.785		961.45	299.019
1684.9	162.246		1117.4	207.364		1007.9	263.68		1007.2	396.19		962.15	301.206
1687.5	162.232		1118	207.444		1008.3	263.939		1007.9	396.562		962.85	303.401
1690.1	162.22		1118.6	207.528		1008.7	264.193		1008.7	396.895		963.55	305.602
1692.7	162.211		1119.2	207.618		1009.2	264.439		1009.4	397.182		964.26	307.807
1695.3	162.206		1119.7	207.715		1009.6	264.677		1010.2	397.418		964.98	310.015
1697.9	162.207		1120.3	207.819		1010	264.907		1010.9	397.597		965.7	312.224
1700.5	162.212		1120.9	207.93		1010.5	265.13		1011.7	397.722		966.41	314.435
1703.1	162.219		1121.5	208.047		1010.9	265.345		1012.5	397.801		967.13	316.65
1705.7	162.23		1122.1	208.171		1011.3	265.553		1013.2	397.829		967.84	318.868
1708.3	162.244		1122.7	208.301		1011.7	265.754		1014	397.805		968.54	321.09
1710.9	162.261		1123.3	208.437		1012.2	265.947		1014.8	397.733		969.23	323.313
1713.5	162.282		1123.9	208.579		1012.6	266.134		1015.6	397.615		969.9	325.538
1716.1	162.305		1124.4	208.726		1013	266.314		1016.3	397.456		970.57	327.762
1718.7	162.331		1125	208.876		1013.5	266.488		1017.1	397.263		971.24	329.987
1721.3	162.359		1125.6	209.031		1013.9	266.656		1017.9	397.033		971.93	332.211
1723.9	162.391		1126.2	209.19		1014.3	266.817		1018.7	396.764		972.64	334.432
1726.5	162.427		1126.8	209.353		1014.8	266.972		1019.5	396.46		973.36	336.649
1729.1	162.466		1127.3	209.52		1015.2	267.122		1020.3	396.122		974.06	338.861
1731.7	162.509		1127.9	209.69		1015.6	267.265		1021.1	395.752		974.74	341.067
1734.3	162.554		1128.5	209.862		1016	267.404		1021.9	395.356		975.42	343.27
1736.9	162.6		1129	210.037		1016.4	267.537		1022.7	394.933		976.1	345.469
1739.5	162.648		1129.6	210.215		1016.9	267.666		1023.4	394.484		976.78	347.665
1742.1	162.698		1130.2	210.393		1017.3	267.79		1024.2	394.016		977.46	349.856
1744.7	162.748		1130.7	210.572		1017.7	267.91		1025	393.531		978.14	352.041
1747.4	162.8		1131.3	210.752		1018.1	268.027		1025.8	393.034		978.83	354.219
1750	162.851		1131.9	210.93		1018.5	268.14		1026.6	392.529		979.52	356.392
1752.6	162.903		1132.4	211.108		1018.9	268.25		1027.4	392.013		980.21	358.556
1755.2	162.957		1133	211.288		1019.3	268.356		1028.2	391.479		980.9	360.713
1757.8	163.013		1133.5	211.468		1019.7	268.458		1029	390.925		981.6	362.861
1760.4	163.073		1134.1	211.65		1020.1	268.555		1029.8	390.347		982.3	364.998
1763	163.135		1134.6	211.835		1020.5	268.647		1030.5	389.746		983	367.124
1765.6	163.199		1135.2	212.02		1020.9	268.736		1031.3	389.127		983.68	369.24
1768.2	163.266		1135.8	212.207		1021.3	268.82		1032.1	388.483		984.34	371.345
1770.8	163.336		1136.3	212.397		1021.7	268.899		1032.9	387.812		985	373.438
1773.4	163.409		1136.9	212.588		1022.1	268.974		1033.6	387.119		985.68	375.519
1776	163.484		1137.4	212.78		1022.5	269.046		1034.4	386.412		986.35	377.585
1778.6	163.562		1138	212.971		1022.9	269.114		1035.2	385.693		987.02	379.636
1781.2	163.642		1138.5	213.161		1023.3	269.18		1036	384.97		987.71	381.671
1783.8	163.724		1139.1	213.35		1023.7	269.243		1036.8	384.241		988.37	383.69
1786.4	163.809		1139.6	213.539		1024.1	269.303		1037.5	383.5		989.03	385.69
1789.1	163.897		1140.2	213.727		1024.5	269.36		1038.3	382.75		989.69	387.672
1791.7	163.988		1140.7	213.914		1024.9	269.414		1039.1	381.993		990.35	389.633
1794.3	164.082		1141.3	214.1		1025.3	269.465		1039.9	381.228		991.03	391.576
1796.9	164.177		1141.8	214.285		1025.7	269.514		1040.7	380.459		991.72	393.5
1799.5	164.274		1142.3	214.469		1026.1	269.561		1041.5	379.682		992.44	395.408
1802.1	164.372		1142.9	214.652		1026.5	269.605		1042.3	378.895		993.12	397.3
1804.7	164.47		1143.4	214.835		1026.9	269.647		1043.1	378.101		993.8	399.176
1807.3	164.569		1143.9	215.016		1027.3	269.687		1043.9	377.304		994.46	401.034
1809.9	164.668		1144.5	215.195		1027.7	269.725		1044.7	376.505		995.12	402.877
1812.5	164.766		1145	215.373		1028.1	269.761		1045.5	375.705		995.8	404.704
1815.1	164.863		1145.6	215.549		1028.5	269.796		1046.3	374.902		996.48	406.516
1817.7	164.96		1146.1	215.723		1028.9	269.829		1047.1	374.095		997.19	408.311
1820.3	165.058		1146.6	215.896		1029.3	269.861		1047.9	373.284		997.92	410.088
1822.9	165.155		1147.1	216.068		1029.7	269.891		1048.6	372.468		998.65	411.846
1825.5	165.252		1147.7	216.238		1030.1	269.919		1049.4	371.647		999.36	413.586
1828.1	165.349		1148.2	216.407		1030.5	269.945		1050.2	370.822		1000.1	415.31
1830.7	165.444		1148.7	216.575		1030.9	269.97		1051	369.991		1000.8	417.018
1833.4	165.538		1149.2	216.742		1031.3	269.993		1051.8	369.153		1001.5	418.709
1836	165.631		1149.7	216.907		1031.7	270.015		1052.5	368.312		1002.1	420.382
1838.6	165.722		1150.3	217.07		1032.1	270.037		1053.3	367.476		1002.8	422.036
1841.2	165.813		1150.8	217.229		1032.5	270.058		1054.1	366.647		1003.6	423.668
1843.8	165.901		1151.3	217.384		1032.8	270.08		1054.9	365.832		1004.3	425.277
1846.4	165.988		1151.8	217.534		1033.2	270.102		1055.7	365.03		1005	426.864
1849	166.073		1152.4	217.68		1033.6	270.125		1056.4	364.242		1005.7	428.426
1851.6	166.157		1152.9	217.821		1034	270.149		1057.2	363.471		1006.4	429.962
1854.2	166.239		1153.4	217.955		1034.3	270.174		1058	362.724		1007.1	431.471
1856.8	166.32		1153.9	218.084		1034.7	270.2		1058.8	361.999		1007.7	432.952
1859.4	166.398		1154.4	218.207		1035.1	270.229		1059.5	361.294		1008.4	434.408
1862	166.473		1154.9	218.325		1035.5	270.258		1060.3	360.61		1009	435.839
1864.6	166.545		1155.5	218.437		1035.8	270.289		1061.1	359.945		1009.7	437.246
1867.2	166.613		1156	218.543		1036.2	270.322		1061.8	359.303		1010.3	438.628
1869.8	166.678		1156.5	218.642		1036.6	270.358		1062.6	358.691		1011	439.981
1872.4	166.739		1157	218.734		1036.9	270.396		1063.4	358.109		1011.7	441.307
1875.1	166.797		1157.5	218.818		1037.3	270.437		1064.2	357.559		1012.3	442.606
1877.7	166.85		1158	218.895		1037.7	270.481		1065	357.037		1013	443.876
1880.3	166.901		1158.5	218.967		1038.1	270.526		1065.8	356.534		1013.6	445.118
1882.9	166.949		1159	219.035		1038.4	270.573		1066.7	356.048		1014.3	446.331
1885.5	166.996		1159.5	219.098		1038.8	270.62		1067.5	355.573		1014.9	447.513
1888.1	167.042		1160	219.157		1039.2	270.668		1068.3	355.108		1015.6	448.666
1890.7	167.086		1160.5	219.213		1039.6	270.716		1069.1	354.651		1016.3	449.789
1893.3	167.129		1161	219.267		1040	270.764		1069.9	354.195		1017	450.884
1895.9	167.171		1161.5	219.321		1040.3	270.811		1070.7	353.733		1017.7	451.949
1898.5	167.212		1162	219.372		1040.7	270.858		1071.5	353.268		1018.4	452.983
1901.1	167.253		1162.5	219.422		1041.1	270.905		1072.3	352.805		1019.1	453.986
1903.7	167.293		1163	219.469		1041.5	270.951		1073.2	352.346		1019.8	454.956
1906.3	167.332		1163.5	219.513		1041.9	270.998		1074	351.892		1020.6	455.893
1908.9	167.371		1163.9	219.555		1042.2	271.045		1074.8	351.44		1021.3	456.795
1911.5	167.41		1164.4	219.597		1042.6	271.09		1075.6	350.977		1022	457.664
1914.1	167.45		1164.9	219.638		1043	271.134		1076.4	350.504		1022.7	458.499
1916.7	167.491		1165.4	219.68		1043.4	271.177		1077.2	350.02		1023.4	459.297
1919.4	167.534		1165.9	219.722		1043.8	271.218		1078	349.524		1024.1	460.06
1922	167.575		1166.4	219.763		1044.1	271.258		1078.9	349.024		1024.8	460.788
1924.6	167.617		1166.9	219.803		1044.5	271.298		1079.7	348.516		1025.4	461.481
1927.2	167.658		1167.4	219.843		1044.9	271.337		1080.5	348.002		1026.1	462.139
1929.8	167.698		1167.9	219.882		1045.3	271.376		1081.3	347.482		1026.7	462.762
1932.4	167.737		1168.4	219.92		1045.6	271.414		1082.1	346.957		1027.3	463.349
1935	167.775		1168.9	219.957		1046	271.453		1082.9	346.43		1027.9	463.899
1937.6	167.812		1169.3	219.991		1046.4	271.492		1083.7	345.905		1028.6	464.413
1940.2	167.846		1169.8	220.024		1046.7	271.531		1084.5	345.375		1029.2	464.891
1942.8	167.881		1170.3	220.058		1047.1	271.568		1085.3	344.831		1029.9	465.331
1945.4	167.916		1170.8	220.094		1047.5	271.604		1086.1	344.27		1030.6	465.734
1948	167.953		1171.2	220.132		1047.8	271.638		1086.9	343.683		1031.3	466.099
1950.6	167.99		1171.7	220.173		1048.2	271.669		1087.7	343.072		1032	466.425
1953.2	168.027		1172.2	220.215		1048.5	271.699		1088.6	342.441		1032.8	466.714
1955.8	168.064		1172.7	220.26		1048.9	271.727		1089.4	341.787		1033.5	466.965
1958.4	168.102		1173.1	220.308		1049.2	271.752		1090.2	341.103		1034.2	467.177
1961.1	168.141		1173.6	220.358		1049.6	271.776		1091	340.397		1035	467.349
1963.7	168.179		1174.1	220.409		1049.9	271.798		1091.8	339.677		1035.7	467.48
1966.3	168.217		1174.6	220.46		1050.3	271.821		1092.6	338.948		1036.4	467.568
1968.9	168.253		1175.1	220.509		1050.6	271.844		1093.4	338.22		1037.2	467.613
1971.5	168.288		1175.5	220.556		1051	271.869		1094.1	337.493		1037.9	467.612
1974.1	168.322		1176	220.603		1051.3	271.893		1094.9	336.761		1038.7	467.566
1976.7	168.355		1176.4	220.647		1051.7	271.919		1095.7	336.033		1039.4	467.473
1979.3	168.386		1176.9	220.688		1052	271.947		1096.5	335.312		1040.1	467.331
1981.9	168.416		1177.4	220.726		1052.4	271.977		1097.3	334.6		1040.8	467.14
1984.5	168.444		1177.8	220.761		1052.7	272.008		1098.1	333.896		1041.5	466.901
1987.1	168.469		1178.3	220.793		1053.1	272.042		1098.9	333.202		1042.2	466.613
1989.7	168.492		1178.8	220.822		1053.5	272.078		1099.7	332.514		1042.8	466.275
1992.3	168.513		1179.2	220.847		1053.8	272.116		1100.5	331.839		1043.5	465.888
1994.9	168.53		1179.7	220.867		1054.2	272.159		1101.2	331.189		1044.2	465.447
1997.5	168.544		1180.2	220.88		1054.6	272.206		1102	330.565		1044.8	464.954
2000.1	168.553		1180.6	220.886		1054.9	272.257		1102.8	329.973		1045.5	464.406
2002.7	168.559		1181.1	220.886		1055.3	272.313		1103.6	329.406		1046.2	463.804
2005.4	168.562		1181.5	220.883		1055.6	272.372		1104.4	328.851		1046.9	463.148
2008	168.563		1182	220.876		1056	272.434		1105.2	328.308		1047.6	462.438
2010.6	168.563		1182.5	220.867		1056.3	272.497		1106	327.769		1048.3	461.673
2013.2	168.561		1182.9	220.855		1056.7	272.563		1106.8	327.234		1049	460.852
2015.8	168.557		1183.4	220.842		1057.1	272.631		1107.6	326.704		1049.7	459.977
2018.4	168.551		1183.8	220.827		1057.4	272.7		1108.4	326.17		1050.4	459.045
2021	168.546		1184.3	220.813		1057.8	272.77		1109.2	325.625		1051.2	458.059
2023.6	168.539		1184.7	220.798		1058.2	272.841		1110	325.077		1051.9	457.015
2026.2	168.53		1185.2	220.78		1058.5	272.915		1110.8	324.536		1052.6	455.913
2028.8	168.519		1185.6	220.759		1058.9	272.992		1111.6	324.006		1053.3	454.751
2031.4	168.505		1186.1	220.733		1059.2	273.074		1112.4	323.498		1054	453.528
2034	168.488		1186.5	220.703		1059.6	273.159		1113.2	323.006		1054.8	452.242
2036.6	168.469		1187	220.67		1059.9	273.247		1113.9	322.517		1055.5	450.896
2039.2	168.449		1187.4	220.635		1060.3	273.338		1114.7	322.037		1056.3	449.487
2041.8	168.427		1187.9	220.597		1060.6	273.432		1115.5	321.567		1057	448.014
2044.4	168.402		1188.3	220.556		1061	273.529		1116.3	321.106		1057.8	446.481
2047.1	168.376		1188.8	220.512		1061.3	273.629		1117.1	320.654		1058.5	444.895
2049.7	168.348		1189.2	220.465		1061.7	273.731		1117.9	320.209		1059.3	443.258
2052.3	168.319		1189.7	220.417		1062	273.835		1118.6	319.764		1060.1	441.576
2054.9	168.288		1190.1	220.367		1062.3	273.94		1119.4	319.323		1060.8	439.85
2057.5	168.255		1190.5	220.314		1062.7	274.048		1120.2	318.892		1061.6	438.08
2060.1	168.22		1191	220.258		1063	274.158		1121	318.469		1062.4	436.272
2062.7	168.184		1191.4	220.199		1063.4	274.269		1121.8	318.058		1063.2	434.43
2065.3	168.146		1191.8	220.138		1063.7	274.382		1122.6	317.653		1063.9	432.554
2067.9	168.106		1192.3	220.076		1064	274.496		1123.4	317.248		1064.7	430.644
2070.5	168.066		1192.7	220.012		1064.3	274.611		1124.1	316.842		1065.4	428.702
2073.1	168.025		1193.1	219.948		1064.7	274.726		1124.9	316.432		1066.1	426.726
2075.7	167.984		1193.6	219.884		1065	274.841		1125.6	316.018		1066.8	424.721
2078.3	167.942		1194	219.819		1065.3	274.956		1126.4	315.598		1067.5	422.697
2080.9	167.901		1194.5	219.755		1065.7	275.07		1127.1	315.17		1068.1	420.654
2083.5	167.859		1194.9	219.691		1066	275.182		1127.9	314.728		1068.8	418.596
2086.1	167.817		1195.3	219.628		1066.3	275.294		1128.7	314.278		1069.5	416.522
2088.7	167.775		1195.8	219.565		1066.7	275.405		1129.4	313.826		1070.2	414.427
2091.4	167.732		1196.2	219.5		1067	275.517		1130.2	313.375		1070.8	412.312
2094	167.688		1196.6	219.433		1067.3	275.63		1130.9	312.93		1071.5	410.176
2096.6	167.643		1197.1	219.364		1067.7	275.743		1131.7	312.49		1072.2	408.019
2099.2	167.597		1197.5	219.293		1068	275.857		1132.4	312.052		1073	405.844
2101.8	167.55		1197.9	219.221		1068.4	275.972		1133.2	311.62		1073.7	403.647
2104.4	167.502		1198.4	219.146		1068.7	276.088		1133.9	311.197		1074.4	401.426
2107	167.453		1198.8	219.069		1069.1	276.205		1134.7	310.78		1075.1	399.187
2109.6	167.403		1199.2	218.99		1069.4	276.323		1135.4	310.367		1075.8	396.94
2112.2	167.353		1199.6	218.909		1069.7	276.439		1136.1	309.957		1076.5	394.687
2114.8	167.302		1200.1	218.829		1070.1	276.555		1136.9	309.543		1077.2	392.437
2117.4	167.251		1200.5	218.747		1070.4	276.67		1137.6	309.13		1077.9	390.188
2120	167.2		1200.9	218.663		1070.8	276.785		1138.4	308.725		1078.6	387.937
2122.6	167.148		1201.3	218.577		1071.1	276.9		1139.1	308.324		1079.4	385.689
2125.2	167.096		1201.7	218.489		1071.4	277.015		1139.8	307.93		1080.2	383.447
2127.8	167.043		1202.2	218.4		1071.8	277.129		1140.6	307.54		1081	381.209
2130.4	166.99		1202.6	218.309		1072.1	277.242		1141.3	307.148		1081.8	378.973
2133.1	166.937		1203	218.219		1072.5	277.354		1142.1	306.755		1082.6	376.735
2135.7	166.884		1203.4	218.128		1072.8	277.466		1142.8	306.359		1083.3	374.49
2138.3	166.831		1203.9	218.036		1073.2	277.578		1143.5	305.959		1084.1	372.241
2140.9	166.779		1204.3	217.946		1073.5	277.687		1144.3	305.551		1084.9	369.992
2143.5	166.727		1204.7	217.856		1073.8	277.796		1145	305.134		1085.7	367.742
2146.1	166.677		1205.1	217.768		1074.2	277.902		1145.7	304.703		1086.4	365.489
2148.7	166.627		1205.5	217.681		1074.5	278.007		1146.5	304.26		1087.2	363.234
2151.3	166.578		1205.9	217.595		1074.8	278.111		1147.2	303.81		1087.9	360.975
2153.9	166.529		1206.3	217.509		1075.1	278.214		1147.9	303.352		1088.6	358.715
2156.5	166.481		1206.7	217.423		1075.5	278.316		1148.7	302.889		1089.2	356.455
2159.1	166.434		1207.2	217.338		1075.8	278.416		1149.4	302.419		1089.9	354.193
2161.7	166.387		1207.6	217.255		1076.1	278.516		1150.1	301.936		1090.6	351.924
2164.3	166.342		1208	217.173		1076.5	278.614		1150.9	301.442		1091.2	349.647
2166.9	166.297		1208.4	217.092		1076.8	278.711		1151.6	300.937		1091.9	347.362
2169.5	166.254		1208.8	217.013		1077.1	278.807		1152.4	300.419		1092.5	345.073
2172.1	166.212		1209.2	216.935		1077.4	278.901		1153.1	299.889		1093.2	342.792
2174.7	166.171		1209.6	216.859		1077.8	278.992		1153.9	299.344		1093.8	340.521
2177.4	166.132		1210	216.786		1078.1	279.08		1154.6	298.781		1094.5	338.267
2180	166.096		1210.5	216.715		1078.4	279.166		1155.4	298.202		1095.2	336.032
2182.6	166.06		1210.9	216.646		1078.7	279.248		1156.1	297.608		1095.9	333.817
2185.2	166.027		1211.3	216.58		1079	279.327		1156.8	296.998		1096.6	331.628
2187.8	165.996		1211.7	216.515		1079.3	279.402		1157.6	296.372		1097.3	329.474
2190.4	165.968		1212.1	216.454		1079.6	279.474		1158.3	295.729		1098	327.35
2193	165.942		1212.5	216.395		1079.9	279.541		1159	295.064		1098.7	325.252
2195.6	165.918		1212.9	216.34		1080.3	279.605		1159.7	294.377		1099.4	323.18
2198.2	165.897		1213.3	216.289		1080.6	279.665		1160.5	293.666		1100	321.127
2200.8	165.879		1213.7	216.242		1080.9	279.721		1161.2	292.931		1100.7	319.101
2203.4	165.863		1214.1	216.198		1081.2	279.772		1161.9	292.17		1101.5	317.112
2206	165.852		1214.5	216.159		1081.5	279.819		1162.7	291.382		1102.2	315.158
2208.6	165.843		1214.9	216.125		1081.9	279.86		1163.4	290.564		1102.9	313.24
2211.2	165.838		1215.3	216.095		1082.2	279.897		1164.2	289.722		1103.7	311.357
2213.8	165.834		1215.7	216.068		1082.5	279.93		1164.9	288.861		1104.5	309.499
2216.4	165.833		1216.1	216.043		1082.8	279.961		1165.6	287.984		1105.3	307.668
2219	165.834		1216.5	216.02		1083.2	279.989		1166.3	287.097		1106.1	305.861
2221.7	165.835		1216.9	215.998		1083.5	280.016		1167	286.202		1106.9	304.074
2224.3	165.838		1217.3	215.977		1083.8	280.04		1167.7	285.296		1107.7	302.305
2226.9	165.842		1217.7	215.957		1084.1	280.064		1168.4	284.385		1108.5	300.548
2229.5	165.846		1218.1	215.937		1084.5	280.089		1169.1	283.474		1109.3	298.797
2232.1	165.851		1218.5	215.917		1084.8	280.112		1169.8	282.563		1110.1	297.055
2234.7	165.856		1218.9	215.897		1085.1	280.136		1170.5	281.649		1110.9	295.331
2237.3	165.862		1219.3	215.878		1085.4	280.158		1171.2	280.733		1111.7	293.625
2239.9	165.869		1219.7	215.859		1085.8	280.179		1171.9	279.813		1112.5	291.941
2242.5	165.876		1220.1	215.839		1086.1	280.201		1172.6	278.895		1113.3	290.276
2245.1	165.883		1220.4	215.818		1086.4	280.223		1173.3	277.986		1114.1	288.618
2247.7	165.889		1220.8	215.795		1086.7	280.246		1174	277.087		1114.8	286.971
2250.3	165.895		1221.2	215.77		1087.1	280.272		1174.7	276.201		1115.6	285.335
2252.9	165.899		1221.6	215.743		1087.4	280.298		1175.4	275.326		1116.4	283.708
2255.5	165.904		1222	215.715		1087.7	280.325		1176.1	274.457		1117.2	282.095
2258.1	165.909		1222.4	215.686		1088	280.353		1176.8	273.593		1118	280.493
2260.7	165.913		1222.8	215.656		1088.3	280.382		1177.6	272.733		1118.8	278.9
2263.4	165.918		1223.2	215.626		1088.7	280.411		1178.3	271.877		1119.6	277.319
2266	165.923		1223.6	215.595		1089	280.442		1179	271.025		1120.4	275.751
2268.6	165.928		1224	215.564		1089.3	280.472		1179.7	270.175		1121.2	274.198
2271.2	165.934		1224.3	215.533		1089.6	280.502		1180.5	269.322		1122	272.663
2273.8	165.94		1224.7	215.502		1089.9	280.533		1181.3	268.471		1122.8	271.141
2276.4	165.946		1225.1	215.47		1090.2	280.565		1182	267.632		1123.5	269.624
2279	165.95		1225.5	215.435		1090.6	280.601		1182.8	266.807		1124.3	268.109
2281.6	165.953		1225.9	215.397		1090.9	280.639		1183.5	266.003		1125.1	266.594
2284.2	165.955		1226.3	215.355		1091.2	280.682		1184.2	265.218		1125.9	265.076
2286.8	165.955		1226.7	215.312		1091.5	280.727		1185	264.447		1126.7	263.559
2289.4	165.954		1227.1	215.266		1091.8	280.775		1185.7	263.694		1127.5	262.04
2292	165.951		1227.4	215.216		1092.1	280.828		1186.5	262.962		1128.2	260.513
2294.6	165.947		1227.8	215.163		1092.4	280.883		1187.2	262.248		1129	258.987
2297.2	165.942		1228.2	215.109		1092.7	280.942		1187.9	261.549		1129.8	257.471
2299.8	165.937		1228.6	215.052		1093	281.002		1188.7	260.861		1130.6	255.97
2302.4	165.932		1228.9	214.996		1093.3	281.062		1189.4	260.178		1131.3	254.495
2305	165.928		1229.3	214.938		1093.6	281.124		1190.2	259.502		1132.1	253.046
2307.7	165.923		1229.7	214.879		1093.9	281.187		1190.9	258.837		1132.9	251.619
2310.3	165.919		1230.1	214.819		1094.2	281.25		1191.7	258.181		1133.6	250.224
2312.9	165.915		1230.4	214.758		1094.5	281.314		1192.4	257.53		1134.4	248.866
2315.5	165.912		1230.8	214.697		1094.8	281.378		1193.2	256.885		1135.2	247.546
2318.1	165.909		1231.2	214.636		1095.1	281.442		1193.9	256.244		1136	246.262
2320.7	165.908		1231.6	214.575		1095.4	281.506		1194.7	255.607		1136.7	245.016
2323.3	165.907		1232	214.513		1095.7	281.57		1195.4	254.975		1137.5	243.804
2325.9	165.908		1232.4	214.452		1096	281.634		1196.2	254.344		1138.3	242.635
2328.5	165.91		1232.7	214.392		1096.3	281.696		1196.9	253.709		1139.1	241.52
2331.1	165.915		1233.1	214.334		1096.6	281.756		1197.7	253.07		1139.8	240.461
2333.7	165.922		1233.5	214.277		1096.9	281.814		1198.4	252.422		1140.5	239.463
2336.3	165.931		1233.9	214.222		1097.3	281.87		1199.1	251.771		1141.2	238.522
2338.9	165.941		1234.2	214.167		1097.6	281.926		1199.8	251.125		1141.9	237.626
2341.5	165.952		1234.6	214.111		1097.9	281.983		1200.6	250.486		1142.5	236.775
2344.1	165.964		1234.9	214.054		1098.2	282.04		1201.3	249.86		1143.2	235.964
2346.7	165.975		1235.3	213.996		1098.5	282.099		1202	249.247		1143.9	235.191
2349.4	165.987		1235.7	213.936		1098.8	282.16		1202.7	248.646		1144.5	234.458
2352	165.998		1236	213.874		1099.1	282.222		1203.4	248.062		1145.2	233.759
2354.6	166.008		1236.4	213.809		1099.4	282.288		1204.1	247.502		1145.8	233.085
2357.2	166.018		1236.8	213.741		1099.7	282.356		1204.8	246.961		1146.5	232.445
2359.8	166.029		1237.2	213.672		1100	282.426		1205.5	246.433		1147.2	231.851
2362.4	166.04		1237.5	213.602		1100.3	282.497		1206.2	245.917		1147.9	231.307
2365	166.052		1237.9	213.532		1100.6	282.567		1206.9	245.406		1148.7	230.824
2367.6	166.065		1238.3	213.461		1101	282.637		1207.6	244.906		1149.4	230.397
2370.2	166.079		1238.6	213.388		1101.3	282.71		1208.3	244.424		1150.1	230.016
2372.8	166.092		1239	213.313		1101.6	282.784		1209.1	243.958		1150.9	229.685
2375.4	166.106		1239.4	213.237		1101.9	282.859		1209.8	243.508		1151.6	229.408
2378	166.121		1239.7	213.158		1102.2	282.935		1210.5	243.074		1152.3	229.18
2380.6	166.135		1240.1	213.08		1102.5	283.012		1211.2	242.649		1153	228.997
2383.2	166.151		1240.5	213		1102.8	283.09		1212	242.236		1153.7	228.853
2385.8	166.166		1240.8	212.918		1103.1	283.168		1212.7	241.835		1154.4	228.739
2388.4	166.181		1241.2	212.837		1103.4	283.247		1213.3	241.443		1155.1	228.656
2391	166.197		1241.6	212.755		1103.7	283.325		1214	241.057		1155.9	228.611
2393.7	166.214		1241.9	212.673		1104	283.402		1214.7	240.674		1156.7	228.598
2396.3	166.232		1242.3	212.592		1104.3	283.477		1215.4	240.291		1157.5	228.614
2398.9	166.25		1242.7	212.512		1104.6	283.551		1216.1	239.91		1158.2	228.658
2401.5	166.268		1243	212.431		1104.9	283.625		1216.8	239.536		1159	228.722
2404.1	166.287		1243.4	212.35		1105.2	283.699		1217.5	239.171		1159.8	228.806
2406.7	166.305		1243.7	212.267		1105.5	283.773		1218.2	238.815		1160.5	228.908
2409.3	166.323		1244.1	212.184		1105.8	283.847		1218.9	238.469		1161.2	229.023
2411.9	166.34		1244.4	212.101		1106.1	283.92		1219.6	238.126		1161.9	229.144
2414.5	166.357		1244.8	212.018		1106.4	283.992		1220.3	237.79		1162.6	229.266
2417.1	166.374		1245.2	211.934		1106.7	284.064		1221	237.46		1163.3	229.382
2419.7	166.39		1245.5	211.85		1107	284.135		1221.7	237.136		1164.1	229.499
2422.3	166.406		1245.9	211.766		1107.3	284.205		1222.4	236.815		1164.8	229.627
2424.9	166.422		1246.2	211.683		1107.5	284.274		1223	236.496		1165.5	229.767
2427.5	166.439		1246.6	211.6		1107.8	284.34		1223.7	236.176		1166.2	229.924
2430.1	166.456		1247	211.519		1108.1	284.404		1224.3	235.855		1166.9	230.1
2432.7	166.474		1247.3	211.438		1108.4	284.466		1225	235.536		1167.6	230.287
2435.4	166.492		1247.7	211.357		1108.7	284.526		1225.7	235.217		1168.2	230.494
2438	166.511		1248	211.278		1109	284.583		1226.3	234.898		1168.9	230.725
2440.6	166.53		1248.4	211.2		1109.3	284.638		1227	234.578		1169.5	230.972
2443.2	166.55		1248.7	211.123		1109.5	284.689		1227.7	234.254		1170.2	231.228
2445.8	166.57		1249.1	211.048		1109.8	284.738		1228.4	233.924		1170.8	231.486
2448.4	166.591		1249.4	210.975		1110.1	284.782		1229.1	233.589		1171.4	231.737
2451	166.611		1249.8	210.903		1110.4	284.823		1229.8	233.246		1172.1	231.984
2453.6	166.633		1250.1	210.834		1110.7	284.86		1230.5	232.894		1172.7	232.237
2456.2	166.655		1250.5	210.767		1111	284.893		1231.2	232.532		1173.4	232.491
2458.8	166.679		1250.8	210.703		1111.3	284.92		1231.9	232.157		1174.1	232.743
2461.4	166.703		1251.2	210.641		1111.6	284.943		1232.5	231.773		1174.8	232.994
2464	166.727		1251.5	210.581		1111.9	284.963		1233.2	231.384		1175.5	233.241
2466.6	166.751		1251.9	210.522		1112.2	284.979		1233.8	230.994		1176.2	233.487
2469.2	166.774		1252.2	210.463		1112.5	284.993		1234.5	230.604		1176.9	233.734
2471.8	166.798		1252.6	210.405		1112.8	285.004		1235.2	230.218		1177.6	233.98
2474.4	166.821		1253	210.348		1113.1	285.013		1235.9	229.831		1178.3	234.219
2477	166.844		1253.3	210.291		1113.4	285.02		1236.6	229.45		1179	234.449
2479.7	166.866		1253.6	210.233		1113.7	285.026		1237.3	229.076		1179.7	234.669
2482.3	166.886		1254	210.175		1113.9	285.03		1238	228.71		1180.4	234.881
2484.9	166.906		1254.3	210.118		1114.2	285.032		1238.6	228.348		1181	235.088
2487.5	166.926		1254.7	210.06		1114.5	285.031		1239.3	227.991		1181.8	235.291
2490.1	166.945		1255	210.003		1114.8	285.028		1240	227.636		1182.5	235.489
2492.7	166.964		1255.4	209.946		1115.1	285.023		1240.7	227.286		1183.2	235.684
2495.3	166.981		1255.7	209.888		1115.4	285.016		1241.3	226.947		1184	235.874
2497.9	166.998		1256.1	209.829		1115.7	285.008		1242	226.62		1184.8	236.061
2500.5	167.013		1256.4	209.769		1116	285		1242.7	226.306		1185.5	236.248
2503.1	167.027		1256.8	209.708		1116.3	284.99		1243.3	226.003		1186.3	236.428
2505.7	167.04		1257.1	209.648		1116.6	284.977		1244	225.705		1187.1	236.593
2508.3	167.052		1257.5	209.587		1116.9	284.962		1244.7	225.412		1187.8	236.738
2510.9	167.063		1257.8	209.526		1117.2	284.944		1245.3	225.124		1188.6	236.858
2513.5	167.073		1258.1	209.466		1117.5	284.924		1246	224.837		1189.3	236.949
2516.1	167.082		1258.5	209.407		1117.8	284.9		1246.7	224.553		1190	237.015
2518.7	167.09		1258.8	209.348		1118.1	284.872		1247.4	224.267		1190.7	237.049
2521.4	167.096		1259.2	209.291		1118.4	284.839		1248.1	223.977		1191.3	237.045
2524	167.102		1259.5	209.235		1118.7	284.803		1248.7	223.685		1192	237.005
2526.6	167.106		1259.8	209.179		1118.9	284.763		1249.4	223.397		1192.7	236.929
2529.2	167.109		1260.2	209.123		1119.2	284.721		1250	223.114		1193.3	236.817
2531.8	167.11		1260.5	209.066		1119.5	284.676		1250.6	222.841		1194	236.673
2534.4	167.109		1260.9	209.009		1119.8	284.629		1251.2	222.575		1194.6	236.491
2537	167.106		1261.2	208.952		1120.1	284.578		1251.8	222.312		1195.2	236.262
2539.6	167.101		1261.6	208.896		1120.4	284.524		1252.5	222.053		1195.8	235.985
2542.2	167.094		1261.9	208.839		1120.7	284.468		1253.1	221.801		1196.4	235.66
			1262.2	208.782		1120.9	284.407		1253.7	221.552		1197.1	235.29
			1262.6	208.725		1121.2	284.344		1254.4	221.309		1197.7	234.889
			1262.9	208.669		1121.5	284.277		1255	221.068		1198.3	234.459
			1263.3	208.614		1121.8	284.205		1255.7	220.827		1198.9	234.006
			1263.6	208.559		1122	284.129		1256.3	220.588		1199.5	233.536
			1263.9	208.506		1122.3	284.05		1257	220.354		1200.2	233.048
			1264.2	208.452		1122.6	283.967		1257.6	220.123		1200.8	232.553
			1264.6	208.4		1122.8	283.88		1258.3	219.896		1201.5	232.06
			1264.9	208.348		1123.1	283.789		1258.9	219.673		1202.2	231.564
			1265.2	208.298		1123.4	283.693		1259.5	219.449		1202.9	231.06
			1265.6	208.248		1123.7	283.592		1260.1	219.225		1203.6	230.547
			1265.9	208.201		1123.9	283.487		1260.8	219.001		1204.2	230.02
			1266.2	208.154		1124.2	283.376		1261.4	218.775		1204.9	229.487
			1266.6	208.11		1124.5	283.26		1262.1	218.547		1205.6	228.963
			1266.9	208.068		1124.8	283.138		1262.8	218.316		1206.2	228.447
			1267.3	208.028		1125.1	283.01		1263.5	218.079		1206.9	227.942
			1267.6	207.99		1125.3	282.877		1264.2	217.84		1207.5	227.448
			1267.9	207.954		1125.6	282.738		1264.9	217.6		1208.2	226.956
			1268.3	207.919		1125.9	282.594		1265.5	217.361		1208.9	226.469
			1268.6	207.885		1126.2	282.446		1266.2	217.125		1209.6	225.987
			1268.9	207.852		1126.5	282.293		1266.9	216.893		1210.4	225.509
			1269.2	207.82		1126.8	282.134		1267.5	216.662		1211.1	225.033
			1269.6	207.79		1127	281.971		1268.2	216.435		1211.8	224.556
			1269.9	207.76		1127.3	281.804		1268.8	216.214		1212.5	224.073
			1270.2	207.731		1127.6	281.631		1269.4	215.996		1213.2	223.593
			1270.6	207.703		1127.9	281.453		1270.1	215.782		1213.8	223.128
			1270.9	207.676		1128.2	281.27		1270.7	215.57		1214.5	222.685
			1271.2	207.652		1128.4	281.082		1271.4	215.358		1215.2	222.271
			1271.6	207.629		1128.7	280.887		1272.1	215.147		1215.8	221.887
			1271.9	207.607		1129	280.688		1272.7	214.942		1216.5	221.526
			1272.2	207.587		1129.3	280.483		1273.4	214.74		1217.1	221.194
			1272.5	207.568		1129.6	280.273		1274	214.543		1217.8	220.898
			1272.9	207.55		1129.9	280.058		1274.6	214.35		1218.5	220.63
			1273.2	207.534		1130.2	279.837		1275.2	214.157		1219.2	220.379
			1273.5	207.519		1130.4	279.609		1275.8	213.966		1219.8	220.139
			1273.8	207.507		1130.7	279.375		1276.4	213.774		1220.4	219.896
			1274.1	207.496		1131	279.135		1277	213.582		1221	219.652
			1274.5	207.487		1131.3	278.887		1277.6	213.389		1221.6	219.414
			1274.8	207.48		1131.6	278.633		1278.2	213.193		1222.2	219.173
			1275.1	207.476		1131.9	278.371		1278.8	212.991		1222.8	218.922
			1275.4	207.474		1132.1	278.102		1279.4	212.786		1223.4	218.662
			1275.8	207.474		1132.4	277.825		1280	212.58		1224	218.39
			1276.1	207.476		1132.7	277.541		1280.7	212.371		1224.6	218.108
			1276.4	207.48		1133	277.251		1281.3	212.162		1225.2	217.819
			1276.8	207.486		1133.2	276.953		1281.9	211.952		1225.8	217.514
			1277.1	207.494		1133.5	276.647		1282.6	211.737		1226.4	217.18
			1277.4	207.504		1133.8	276.333		1283.2	211.519		1227	216.814
			1277.7	207.516		1134.1	276.011		1283.8	211.298		1227.6	216.41
			1278.1	207.531		1134.3	275.682		1284.4	211.073		1228.3	215.975
			1278.4	207.548		1134.6	275.344		1285	210.844		1228.9	215.527
			1278.7	207.567		1134.9	274.998		1285.6	210.612		1229.6	215.068
			1279	207.589		1135.2	274.644		1286.2	210.374		1230.2	214.606
			1279.3	207.613		1135.4	274.281		1286.8	210.132		1230.9	214.145
			1279.6	207.641		1135.7	273.91		1287.4	209.885		1231.5	213.68
			1279.9	207.671		1136	273.53		1288.1	209.635		1232.2	213.223
			1280.3	207.703		1136.2	273.141		1288.7	209.382		1232.9	212.786
			1280.6	207.739		1136.5	272.744		1289.4	209.124		1233.6	212.359
			1280.9	207.778		1136.7	272.338		1290.1	208.859		1234.3	211.927
			1281.2	207.819		1137	271.922		1290.8	208.588		1235	211.485
			1281.5	207.864		1137.3	271.497		1291.4	208.31		1235.7	211.022
			1281.9	207.911		1137.5	271.062		1292.1	208.024		1236.4	210.544
			1282.2	207.962		1137.8	270.617		1292.7	207.731		1237	210.068
			1282.5	208.017		1138.1	270.163		1293.3	207.43		1237.7	209.587
			1282.8	208.075		1138.3	269.698		1293.9	207.12		1238.3	209.1
			1283.1	208.136		1138.6	269.224		1294.5	206.802		1239	208.608
			1283.5	208.199		1138.9	268.741		1295.1	206.478		1239.6	208.109
			1283.8	208.265		1139.1	268.251		1295.8	206.151		1240.3	207.606
			1284.1	208.333		1139.4	267.754		1296.4	205.821		1240.9	207.106
			1284.4	208.403		1139.7	267.251		1297	205.489		1241.6	206.604
			1284.7	208.475		1140	266.742		1297.6	205.154		1242.2	206.093
			1285	208.548		1140.2	266.227		1298.3	204.818		1242.8	205.573
			1285.4	208.622		1140.5	265.708		1298.9	204.482		1243.5	205.041
			1285.7	208.697		1140.8	265.185		1299.5	204.147		1244.1	204.501
			1286	208.773		1141.1	264.657		1300.1	203.812		1244.7	203.963
			1286.3	208.85		1141.3	264.125		1300.7	203.477		1245.3	203.428
			1286.6	208.928		1141.6	263.588		1301.2	203.142		1245.9	202.9
			1286.9	209.008		1141.9	263.048		1301.8	202.808		1246.5	202.38
			1287.2	209.087		1142.1	262.505		1302.4	202.477		1247.1	201.865
			1287.6	209.166		1142.4	261.961		1302.9	202.151		1247.6	201.362
			1287.9	209.246		1142.7	261.416		1303.5	201.83		1248.2	200.874
			1288.2	209.325		1143	260.87		1304.1	201.514		1248.8	200.396
			1288.5	209.405		1143.2	260.321		1304.7	201.199		1249.3	199.921
			1288.8	209.484		1143.5	259.771		1305.2	200.888		1249.9	199.445
			1289.1	209.564		1143.8	259.218		1305.9	200.578		1250.5	198.962
			1289.4	209.645		1144.1	258.663		1306.5	200.269		1251.1	198.471
			1289.7	209.725		1144.4	258.106		1307.1	199.963		1251.7	197.98
			1290	209.806		1144.6	257.547		1307.7	199.657		1252.3	197.481
			1290.3	209.888		1144.9	256.985		1308.3	199.35		1252.9	196.973
			1290.6	209.969		1145.2	256.421		1308.9	199.045		1253.6	196.456
			1291	210.05		1145.5	255.857		1309.4	198.743		1254.2	195.933
			1291.3	210.131		1145.7	255.293		1310	198.446		1254.8	195.406
			1291.6	210.21		1146	254.732		1310.6	198.157		1255.5	194.878
			1291.9	210.288		1146.3	254.173		1311.2	197.874		1256.1	194.347
			1292.2	210.364		1146.5	253.615		1311.7	197.595		1256.7	193.804
			1292.5	210.44		1146.8	253.058		1312.3	197.323		1257.3	193.251
			1292.8	210.514		1147.1	252.505		1312.9	197.057		1257.9	192.687
			1293.1	210.586		1147.3	251.953		1313.6	196.797		1258.5	192.114
			1293.4	210.658		1147.6	251.404		1314.2	196.543		1259.1	191.541
			1293.7	210.728		1147.9	250.855		1314.9	196.293		1259.8	190.969
			1294	210.798		1148.2	250.307		1315.5	196.046		1260.4	190.4
			1294.3	210.868		1148.4	249.759		1316.2	195.803		1261.1	189.837
			1294.6	210.936		1148.7	249.213		1316.8	195.564		1261.8	189.281
			1294.9	211.004		1149	248.668		1317.4	195.33		1262.5	188.738
			1295.2	211.071		1149.2	248.123		1318	195.1		1263.1	188.213
			1295.5	211.138		1149.5	247.58		1318.6	194.873		1263.8	187.703
			1295.8	211.204		1149.8	247.037		1319.2	194.649		1264.4	187.204
			1296.1	211.269		1150	246.495		1319.8	194.428		1265.1	186.715
			1296.5	211.333		1150.3	245.954		1320.4	194.211		1265.7	186.231
			1296.8	211.398		1150.5	245.414		1321	193.996		1266.4	185.759
			1297.1	211.461		1150.8	244.874		1321.6	193.782		1267	185.305
			1297.4	211.525		1151	244.333		1322.2	193.569		1267.6	184.867
			1297.7	211.589		1151.3	243.792		1322.8	193.356		1268.2	184.447
			1298	211.653		1151.5	243.252		1323.4	193.145		1268.9	184.046
			1298.3	211.715		1151.8	242.713		1324	192.938		1269.5	183.66
			1298.6	211.777		1152	242.178		1324.6	192.735		1270.1	183.293
			1298.9	211.836		1152.3	241.647		1325.2	192.539		1270.7	182.946
			1299.2	211.894		1152.6	241.121		1325.7	192.35		1271.3	182.618
			1299.5	211.949		1152.8	240.598		1326.3	192.167		1271.9	182.308
			1299.8	212.002		1153.1	240.082		1326.8	191.992		1272.5	182.015
			1300.1	212.053		1153.3	239.573		1327.4	191.826		1273	181.737
			1300.4	212.1		1153.6	239.071		1327.9	191.67		1273.5	181.478
			1300.7	212.146		1153.8	238.574		1328.4	191.521		1274.1	181.243
			1301	212.189		1154.1	238.083		1329	191.379		1274.6	181.036
			1301.3	212.23		1154.4	237.596		1329.5	191.242		1275.1	180.858
			1301.6	212.27		1154.7	237.115		1330.1	191.112		1275.7	180.71
			1301.9	212.306		1154.9	236.641		1330.6	190.991		1276.2	180.59
			1302.2	212.34		1155.2	236.175		1331.2	190.879		1276.7	180.503
			1302.5	212.371		1155.4	235.716		1331.8	190.776		1277.3	180.449
			1302.8	212.399		1155.7	235.264		1332.4	190.681		1277.8	180.425
			1303.1	212.425		1156	234.817		1333	190.592		1278.4	180.425
			1303.4	212.449		1156.2	234.376		1333.6	190.51		1279	180.443
			1303.7	212.47		1156.5	233.94		1334.1	190.433		1279.6	180.475
			1304	212.49		1156.8	233.509		1334.7	190.361		1280.2	180.519
			1304.3	212.507		1157	233.082		1335.2	190.293		1280.8	180.578
			1304.5	212.524		1157.3	232.658		1335.8	190.227		1281.4	180.646
			1304.8	212.539		1157.5	232.236		1336.3	190.162		1282	180.719
			1305.1	212.553		1157.8	231.817		1336.9	190.099		1282.5	180.798
			1305.5	212.566		1158.1	231.402		1337.4	190.04		1283.1	180.882
			1305.8	212.576		1158.3	230.991		1338	189.983		1283.7	180.971
			1306.1	212.584		1158.6	230.585		1338.6	189.932		1284.2	181.067
			1306.4	212.591		1158.9	230.183		1339.2	189.883		1284.8	181.165
			1306.7	212.596		1159.2	229.784		1339.8	189.836		1285.4	181.256
			1307	212.599		1159.4	229.388		1340.4	189.79		1286	181.34
			1307.3	212.601		1159.7	228.994		1341.1	189.746		1286.6	181.412
			1307.5	212.601		1160	228.604		1341.7	189.703		1287.2	181.475
			1307.8	212.6		1160.2	228.217		1342.3	189.661		1287.8	181.537
			1308.1	212.597		1160.5	227.832		1342.9	189.62		1288.4	181.598
			1308.4	212.593		1160.7	227.45		1343.5	189.579		1289.1	181.66
			1308.7	212.588		1161	227.071		1344.1	189.539		1289.7	181.725
			1309	212.581		1161.3	226.696		1344.6	189.499		1290.3	181.79
			1309.3	212.572		1161.5	226.324		1345.2	189.46		1290.9	181.86
			1309.6	212.562		1161.8	225.955		1345.7	189.423		1291.5	181.94
			1309.8	212.55		1162	225.59		1346.3	189.385		1292.1	182.024
			1310.1	212.537		1162.3	225.226		1346.9	189.346		1292.8	182.102
			1310.4	212.524		1162.5	224.864		1347.4	189.305		1293.4	182.172
			1310.7	212.509		1162.8	224.503		1348	189.26		1294	182.226
			1311	212.494		1163.1	224.142		1348.6	189.212		1294.6	182.267
			1311.3	212.479		1163.3	223.782		1349.2	189.161		1295.2	182.302
			1311.6	212.462		1163.6	223.422		1349.8	189.105		1295.8	182.325
			1311.9	212.446		1163.8	223.062		1350.3	189.044		1296.5	182.334
			1312.2	212.428		1164.1	222.702		1350.9	188.979		1297.1	182.333
			1312.5	212.41		1164.3	222.345		1351.4	188.912		1297.6	182.323
			1312.8	212.389		1164.6	221.992		1351.9	188.844		1298.2	182.308
			1313.1	212.367		1164.8	221.643		1352.5	188.777		1298.7	182.293
			1313.3	212.342		1165.1	221.3		1353	188.711		1299.3	182.277
			1313.6	212.315		1165.3	220.962		1353.5	188.644		1299.8	182.255
			1313.9	212.286		1165.6	220.629		1354	188.579		1300.3	182.23
			1314.2	212.253		1165.8	220.304		1354.5	188.516		1300.8	182.203
			1314.5	212.217		1166.1	219.986		1355	188.456		1301.3	182.175
			1314.8	212.179		1166.3	219.675		1355.6	188.398		1301.8	182.149
			1315.1	212.138		1166.6	219.372		1356.1	188.342		1302.3	182.125
			1315.4	212.094		1166.8	219.074		1356.7	188.286		1302.8	182.102
			1315.7	212.046		1167.1	218.785		1357.2	188.233		1303.3	182.084
			1316	211.995		1167.3	218.506		1357.9	188.185		1303.8	182.074
			1316.3	211.94		1167.6	218.237		1358.7	188.142		1304.3	182.074
			1316.5	211.881		1167.8	217.979		1359.5	188.104		1304.8	182.088
			1316.8	211.817		1168.1	217.731		1360.3	188.072		1305.4	182.111
			1317.1	211.751		1168.3	217.492		1361.1	188.041		1305.9	182.135
			1317.4	211.681		1168.6	217.261		1361.9	188.012		1306.4	182.157
			1317.7	211.607		1168.9	217.038		1362.7	187.983		1307	182.172
			1317.9	211.531		1169.2	216.821		1363.5	187.955		1307.6	182.179
			1318.2	211.452		1169.5	216.612		1364.3	187.927		1308.2	182.181
			1318.5	211.37		1169.7	216.41		1365.1	187.897		1308.7	182.17
			1318.8	211.285		1170	216.212		1365.9	187.864		1309.3	182.143
			1319.1	211.198		1170.3	216.02		1366.8	187.83		1309.8	182.103
			1319.4	211.108		1170.6	215.837		1367.5	187.796		1310.3	182.055
			1319.6	211.014		1170.9	215.663		1368.3	187.763		1310.9	182
			1319.9	210.915		1171.3	215.5		1369.1	187.734		1311.4	181.945
			1320.2	210.813		1171.6	215.347		1369.8	187.706		1311.9	181.885
			1320.5	210.707		1172	215.202		1370.6	187.678		1312.5	181.812
			1320.8	210.597		1172.3	215.066		1371.4	187.651		1313	181.728
			1321.1	210.483		1172.7	214.94		1372.1	187.624		1313.6	181.633
			1321.4	210.366		1173.1	214.823		1372.9	187.598		1314.2	181.528
			1321.7	210.246		1173.5	214.714		1373.7	187.573		1314.7	181.418
			1321.9	210.122		1173.9	214.612		1374.4	187.549		1315.3	181.302
			1322.2	209.997		1174.2	214.516		1375.1	187.524		1316	181.179
			1322.5	209.868		1174.6	214.426		1375.9	187.5		1316.6	181.053
			1322.8	209.738		1175	214.343		1376.6	187.478		1317.2	180.927
			1323.1	209.605		1175.5	214.266		1377.3	187.457		1317.9	180.802
			1323.3	209.469		1176	214.195		1378	187.439		1318.5	180.684
			1323.6	209.332		1176.5	214.13		1378.8	187.422		1319.1	180.569
			1323.9	209.194		1177	214.068		1379.5	187.405		1319.7	180.451
			1324.2	209.053		1177.4	214.011		1380.3	187.389		1320.3	180.331
			1324.4	208.911		1177.9	213.957		1381.1	187.372		1320.9	180.206
			1324.7	208.769		1178.3	213.907		1381.9	187.355		1321.5	180.078
			1325	208.625		1178.8	213.858		1382.7	187.338		1322.1	179.951
			1325.3	208.482		1179.2	213.81		1383.4	187.32		1322.7	179.824
			1325.6	208.338		1179.7	213.763		1384.2	187.301		1323.3	179.695
			1325.8	208.194		1180.1	213.716		1385	187.281		1323.9	179.567
			1326.1	208.05		1180.5	213.672		1385.7	187.262		1324.5	179.44
			1326.4	207.905		1181	213.63		1386.5	187.244		1325	179.316
			1326.7	207.758		1181.4	213.593		1387.2	187.229		1325.7	179.198
			1327	207.61		1181.8	213.559		1388	187.215		1326.5	179.085
			1327.2	207.461		1182.3	213.529		1388.8	187.203		1327.4	178.975
			1327.5	207.311		1182.7	213.502		1389.6	187.193		1328.3	178.869
			1327.8	207.16		1183.1	213.481		1390.3	187.186		1329.2	178.766
			1328.1	207.007		1183.6	213.463		1391.2	187.181		1330.1	178.67
			1328.4	206.854		1184	213.447		1392	187.179		1331	178.581
			1328.6	206.7		1184.5	213.433		1392.9	187.179		1332	178.503
			1328.9	206.548		1184.9	213.419		1393.8	187.181		1333	178.434
			1329.2	206.395		1185.3	213.405		1394.7	187.186		1334.1	178.377
			1329.5	206.242		1185.8	213.393		1395.7	187.194		1335.1	178.332
			1329.7	206.09		1186.2	213.382		1396.7	187.205		1336.2	178.301
			1330	205.937		1186.7	213.372		1397.6	187.221		1337.2	178.286
			1330.3	205.785		1187.2	213.363		1398.6	187.24		1338.5	178.285
			1330.6	205.634		1187.6	213.354		1399.5	187.261		1339.8	178.291
			1330.9	205.482		1188.1	213.346		1400.4	187.283		1341	178.304
			1331.1	205.33		1188.7	213.339		1401.4	187.307		1342.3	178.319
			1331.4	205.179		1189.2	213.333		1402.5	187.331		1343.5	178.335
			1331.7	205.028		1189.8	213.326		1403.6	187.356		1344.8	178.354
			1332	204.878		1190.3	213.319		1404.6	187.381		1346.1	178.373
			1332.2	204.728		1190.9	213.311		1405.8	187.404		1347.4	178.388
			1332.5	204.579		1191.4	213.302		1406.9	187.427		1348.7	178.399
			1332.8	204.431		1191.9	213.294		1408	187.449		1350.1	178.41
			1333	204.283		1192.4	213.285		1409.1	187.472		1351.5	178.419
			1333.3	204.135		1192.9	213.276		1410.3	187.495		1352.9	178.43
			1333.6	203.988		1193.4	213.268		1411.4	187.519		1354.2	178.438
			1333.8	203.841		1193.9	213.26		1412.6	187.541		1355.6	178.439
			1334.1	203.694		1194.4	213.251		1413.8	187.562		1356.9	178.432
			1334.4	203.548		1194.9	213.244		1414.9	187.581		1358.2	178.415
			1334.7	203.402		1195.4	213.236		1416	187.6		1359.6	178.391
			1334.9	203.257		1195.9	213.226		1417	187.617		1360.9	178.364
			1335.2	203.114		1196.4	213.214		1418	187.634		1362.2	178.334
			1335.5	202.972		1196.9	213.198		1418.9	187.651		1363.4	178.304
			1335.8	202.833		1197.4	213.178		1419.9	187.666		1364.7	178.274
			1336.1	202.696		1197.9	213.156		1420.8	187.682		1365.9	178.245
			1336.3	202.561		1198.4	213.128		1421.7	187.698		1367.2	178.219
			1336.6	202.428		1198.9	213.096		1422.6	187.714		1368.4	178.2
			1336.9	202.299		1199.4	213.058		1423.5	187.73		1369.6	178.185
			1337.2	202.172		1199.9	213.015		1424.4	187.746		1370.9	178.168
			1337.4	202.048		1200.4	212.967		1425.3	187.76		1372.1	178.148
			1337.7	201.926		1200.9	212.914		1426.2	187.772		1373.4	178.121
			1338	201.807		1201.4	212.856		1427.1	187.781		1374.6	178.088
			1338.2	201.691		1201.9	212.79		1428.1	187.79		1375.8	178.055
			1338.5	201.579		1202.4	212.718		1429.1	187.797		1377	178.019
			1338.7	201.47		1202.9	212.638		1430.1	187.801		1378.2	177.98
			1339	201.365		1203.4	212.552		1431.1	187.804		1379.4	177.937
			1339.3	201.262		1203.9	212.461		1432	187.806		1380.5	177.892
			1339.5	201.161		1204.4	212.367		1432.9	187.806		1381.7	177.846
			1339.8	201.062		1205	212.269		1433.9	187.807		1382.8	177.801
			1340.1	200.965		1205.5	212.168		1434.8	187.808		1383.9	177.757
			1340.3	200.87		1206	212.066		1435.7	187.807		1385.1	177.711
			1340.6	200.776		1206.6	211.962		1436.6	187.807		1386.3	177.663
			1340.9	200.682		1207.1	211.86		1437.6	187.806		1387.5	177.612
			1341.2	200.589		1207.7	211.757		1438.5	187.805		1388.6	177.561
			1341.4	200.497		1208.3	211.654		1439.5	187.805		1389.8	177.512
			1341.7	200.407		1208.8	211.55		1440.6	187.804		1390.9	177.464
			1342	200.318		1209.4	211.443		1441.7	187.804		1392	177.419
			1342.2	200.23		1210	211.337		1442.7	187.804		1393.1	177.377
			1342.5	200.143		1210.5	211.232		1443.8	187.806		1394.2	177.339
			1342.8	200.056		1211	211.129		1444.9	187.809		1395.3	177.307
			1343	199.969		1211.6	211.028		1445.9	187.814		1396.4	177.281
			1343.3	199.882		1212.1	210.929		1447	187.82		1397.4	177.26
			1343.6	199.796		1212.6	210.831		1448.1	187.826		1398.5	177.241
			1343.8	199.711		1213.1	210.734		1449.1	187.833		1399.6	177.222
			1344.1	199.626		1213.7	210.638		1450.2	187.84		1400.7	177.202
			1344.4	199.542		1214.2	210.543		1451.3	187.846		1401.8	177.18
			1344.6	199.458		1214.7	210.449		1452.5	187.852		1402.9	177.158
			1344.9	199.376		1215.2	210.354		1453.5	187.858		1404	177.133
			1345.2	199.294		1215.7	210.259		1454.5	187.862		1405.2	177.104
			1345.5	199.214		1216.2	210.165		1455.4	187.866		1406.3	177.072
			1345.7	199.133		1216.7	210.073		1456.3	187.869		1407.5	177.039
			1346	199.053		1217.2	209.985		1457.2	187.873		1408.6	177.005
			1346.2	198.971		1217.7	209.901		1458.1	187.878		1409.8	176.972
			1346.5	198.889		1218.2	209.823		1458.9	187.884		1410.9	176.939
			1346.8	198.806		1218.7	209.748		1459.8	187.889		1412	176.902
			1347	198.722		1219.2	209.678		1460.6	187.894		1413.1	176.862
			1347.3	198.638		1219.7	209.614		1461.5	187.899		1414.3	176.82
			1347.5	198.553		1220.2	209.555		1462.3	187.905		1415.4	176.775
			1347.8	198.467		1220.7	209.498		1463.2	187.91		1416.5	176.73
			1348.1	198.383		1221.2	209.443		1464	187.916		1417.6	176.684
			1348.3	198.299		1221.8	209.388		1464.9	187.921		1418.7	176.638
			1348.6	198.217		1222.3	209.333		1465.8	187.927		1419.7	176.593
			1348.8	198.136		1222.8	209.278		1466.8	187.932		1420.8	176.549
			1349.1	198.057		1223.3	209.223		1467.7	187.938		1421.8	176.508
			1349.4	197.979		1223.8	209.167		1468.6	187.945		1422.9	176.471
			1349.6	197.904		1224.4	209.109		1469.5	187.952		1423.9	176.437
			1349.9	197.83		1224.9	209.049		1470.4	187.958		1425	176.405
			1350.2	197.759		1225.5	208.988		1471.3	187.965		1426	176.372
			1350.4	197.689		1226	208.925		1472.1	187.971		1427.1	176.34
			1350.7	197.622		1226.6	208.86		1473	187.976		1428.2	176.308
			1351	197.558		1227.2	208.79		1473.9	187.981		1429.2	176.278
			1351.3	197.498		1227.8	208.714		1474.7	187.985		1430.3	176.251
			1351.5	197.441		1228.4	208.633		1475.6	187.989		1431.3	176.224
			1351.8	197.388		1229	208.546		1476.5	187.992		1432.3	176.199
			1352	197.338		1229.6	208.458		1477.5	187.995		1433.3	176.176
			1352.3	197.289		1230.2	208.367		1478.4	187.997		1434.3	176.155
			1352.5	197.243		1230.8	208.276		1479.5	188.001		1435.3	176.138
			1352.8	197.198		1231.4	208.184		1480.5	188.004		1436.3	176.124
			1353.1	197.155		1232.1	208.092		1481.5	188.008		1437.3	176.112
			1353.3	197.114		1232.7	208.001		1482.5	188.012		1438.3	176.102
			1353.6	197.072		1233.3	207.912		1483.5	188.017		1439.2	176.093
			1353.8	197.032		1233.9	207.825		1484.5	188.023		1440.2	176.088
			1354.1	196.994		1234.6	207.737		1485.5	188.028		1441.2	176.086
			1354.3	196.959		1235.2	207.647		1486.5	188.035		1442.2	176.088
			1354.6	196.927		1235.8	207.553		1487.5	188.041		1443.2	176.095
			1354.8	196.897		1236.3	207.457		1488.6	188.047		1444.2	176.106
			1355.1	196.87		1236.9	207.36		1489.6	188.055		1445.2	176.122
			1355.4	196.844		1237.5	207.263		1490.6	188.063		1446.2	176.143
			1355.6	196.821		1238.1	207.164		1491.6	188.072		1447.2	176.17
			1355.9	196.8		1238.7	207.063		1492.5	188.081		1448.1	176.201
			1356.2	196.782		1239.2	206.962		1493.3	188.091		1449.1	176.236
			1356.5	196.765		1239.8	206.859		1494.2	188.101		1450	176.274
			1356.7	196.749		1240.4	206.757		1495	188.111		1450.9	176.313
			1357	196.735		1240.9	206.653		1495.8	188.121		1451.8	176.354
			1357.3	196.723		1241.5	206.548		1496.6	188.132		1452.8	176.396
			1357.6	196.713		1242	206.442		1497.4	188.141		1453.7	176.439
			1357.8	196.704		1242.6	206.332		1498.2	188.151		1454.6	176.482
			1358.1	196.698		1243.2	206.222		1499	188.159		1455.5	176.525
			1358.4	196.692		1243.7	206.111		1499.8	188.168		1456.5	176.568
			1358.7	196.687		1244.3	206		1500.6	188.177		1457.4	176.611
			1358.9	196.682		1244.8	205.89		1501.4	188.185		1458.4	176.655
			1359.2	196.678		1245.4	205.781		1502.2	188.194		1459.6	176.699
			1359.5	196.675		1245.9	205.673		1503	188.202		1460.7	176.742
			1359.8	196.671		1246.5	205.566		1503.9	188.21		1461.7	176.782
			1360.1	196.668		1247.1	205.46		1504.8	188.217		1462.8	176.82
			1360.3	196.664		1247.6	205.357		1505.6	188.224		1463.8	176.856
			1360.6	196.66		1248.2	205.253		1506.5	188.231		1464.8	176.891
			1360.9	196.658		1248.7	205.149		1507.3	188.237		1465.9	176.925
			1361.2	196.657		1249.3	205.043		1508.1	188.243		1466.9	176.96
			1361.4	196.656		1249.9	204.935		1508.9	188.249		1468	176.994
			1361.7	196.657		1250.5	204.827		1509.7	188.254		1469.1	177.028
			1362	196.659		1251	204.717		1510.5	188.259		1470.2	177.062
			1362.2	196.662		1251.6	204.605		1511.3	188.264		1471.2	177.098
			1362.5	196.667		1252.2	204.492		1512.2	188.269		1472.2	177.135
			1362.8	196.672		1252.8	204.377		1513	188.273		1473.2	177.17
			1363	196.678		1253.4	204.26		1513.8	188.277		1474.2	177.204
			1363.3	196.684		1254	204.144		1514.7	188.279		1475.2	177.234
			1363.6	196.691		1254.6	204.026		1515.6	188.281		1476.2	177.262
			1363.8	196.698		1255.2	203.906		1516.5	188.282		1477.2	177.289
			1364.1	196.706		1255.9	203.784		1517.4	188.283		1478.3	177.314
			1364.4	196.715		1256.5	203.66		1518.4	188.282		1479.4	177.336
			1364.6	196.724		1257.2	203.533		1519.3	188.281		1480.5	177.357
			1364.9	196.733		1257.8	203.407		1520.3	188.279		1481.6	177.375
			1365.2	196.743		1258.5	203.279		1521.2	188.277		1482.8	177.392
			1365.5	196.753		1259.1	203.152		1522.1	188.275		1483.9	177.41
			1365.9	196.763		1259.8	203.025		1523	188.272		1485	177.426
			1366.4	196.772		1260.4	202.899		1523.9	188.269		1486.1	177.441
			1366.8	196.781		1261	202.774		1524.9	188.266		1487.2	177.456
			1367.2	196.79		1261.6	202.651		1525.8	188.263		1488.3	177.469
			1367.7	196.797		1262.2	202.53		1526.7	188.26		1489.5	177.482
			1368.1	196.805		1262.9	202.41		1527.7	188.257		1490.7	177.494
			1368.5	196.812		1263.5	202.291		1528.6	188.255		1491.9	177.507
			1368.9	196.819		1264.1	202.172		1529.5	188.252		1493	177.519
			1369.3	196.826		1264.7	202.054		1530.3	188.249		1494	177.532
			1369.8	196.833		1265.3	201.938		1531.1	188.246		1495	177.546
			1370.2	196.838		1265.9	201.824		1531.9	188.244		1496	177.561
			1370.6	196.844		1266.5	201.712		1532.7	188.243		1496.9	177.578
			1371	196.848		1267.1	201.602		1533.4	188.242		1497.9	177.595
			1371.4	196.852		1267.7	201.494		1534.2	188.241		1498.8	177.613
			1371.8	196.855		1268.3	201.388		1534.9	188.24		1499.7	177.63
			1372.2	196.856		1268.9	201.284		1535.6	188.239		1500.7	177.645
			1372.7	196.856		1269.5	201.183		1536.4	188.239		1501.6	177.659
			1373.1	196.854		1270.1	201.084		1537.1	188.238		1502.6	177.672
			1373.5	196.851		1270.7	200.987		1537.8	188.237		1503.5	177.682
			1373.9	196.847		1271.3	200.891		1538.6	188.235		1504.5	177.69
			1374.4	196.84		1271.9	200.798		1539.3	188.234		1505.5	177.695
			1374.8	196.832		1272.5	200.708		1540.1	188.232		1506.5	177.698
			1375.2	196.822		1273.1	200.621		1540.9	188.231		1507.4	177.701
			1375.7	196.809		1273.8	200.538		1541.7	188.23		1508.3	177.703
			1376.1	196.795		1274.4	200.459		1542.5	188.23		1509.2	177.703
			1376.5	196.778		1275	200.384		1543.3	188.229		1510.2	177.702
			1376.9	196.758		1275.7	200.313		1544.1	188.229		1511.1	177.698
			1377.3	196.735		1276.3	200.246		1544.9	188.229		1512	177.692
			1377.7	196.711		1277	200.184		1545.6	188.23		1512.9	177.684
			1378.1	196.684		1277.6	200.124		1546.4	188.23		1513.9	177.676
			1378.5	196.656		1278.3	200.066		1547.1	188.231		1514.8	177.666
			1378.9	196.626		1279	200.009		1547.9	188.231		1515.8	177.654
			1379.3	196.596		1279.7	199.953		1548.6	188.232		1516.9	177.642
			1379.7	196.565		1280.4	199.899		1549.4	188.232		1517.9	177.63
			1380.1	196.534		1281	199.844		1550.1	188.233		1518.9	177.617
			1380.5	196.502		1281.7	199.79		1550.9	188.234		1519.9	177.606
			1380.9	196.47		1282.4	199.734		1551.7	188.235		1520.9	177.594
			1381.4	196.438		1283	199.679		1552.5	188.236		1521.9	177.582
			1381.8	196.406		1283.7	199.623		1553.3	188.238		1522.9	177.569
			1382.3	196.373		1284.3	199.567		1554.2	188.239		1523.9	177.555
			1382.8	196.34		1285	199.51		1555.1	188.239		1525	177.541
			1383.3	196.308		1285.6	199.45		1556	188.24		1526.1	177.526
			1383.8	196.276		1286.2	199.388		1556.9	188.241		1527.1	177.511
			1384.2	196.246		1286.8	199.323		1557.8	188.241		1528.2	177.496
			1384.7	196.216		1287.5	199.255		1558.7	188.241		1529.1	177.481
			1385.1	196.186		1288.1	199.185		1559.6	188.241		1530.1	177.465
			1385.6	196.157		1288.7	199.113		1560.4	188.241		1531	177.45
			1386	196.128		1289.3	199.041		1561.3	188.241		1531.9	177.436
			1386.5	196.1		1289.9	198.967		1562.2	188.241		1532.7	177.422
			1386.9	196.071		1290.5	198.891		1563.1	188.242		1533.6	177.408
			1387.4	196.042		1291.1	198.815		1564	188.243		1534.4	177.395
			1387.9	196.013		1291.7	198.739		1564.9	188.244		1535.3	177.382
			1388.3	195.984		1292.3	198.662		1565.8	188.245		1536.1	177.37
			1388.8	195.956		1292.9	198.583		1566.6	188.246		1537	177.359
			1389.3	195.929		1293.6	198.5		1567.4	188.248		1537.8	177.349
			1389.8	195.903		1294.2	198.413		1568.2	188.25		1538.7	177.341
			1390.3	195.879		1294.8	198.323		1568.9	188.252		1539.6	177.334
			1390.8	195.857		1295.4	198.229		1569.7	188.254		1540.5	177.329
			1391.4	195.835		1296	198.132		1570.4	188.256		1541.4	177.326
			1391.9	195.816		1296.6	198.03		1571.1	188.259		1542.3	177.325
			1392.5	195.798		1297.3	197.925		1571.8	188.262		1543.1	177.326
			1393.1	195.781		1297.9	197.817		1572.5	188.265		1543.9	177.328
			1393.6	195.765		1298.5	197.706		1573.2	188.268		1544.8	177.332
			1394.2	195.748		1299.2	197.594		1573.8	188.271		1545.6	177.335
			1394.8	195.732		1299.8	197.479		1574.5	188.275		1546.4	177.339
			1395.3	195.716		1300.5	197.362		1575.2	188.279		1547.2	177.343
			1395.8	195.7		1301.1	197.242		1575.9	188.283		1548.1	177.348
			1396.3	195.684		1301.8	197.12		1576.6	188.287		1548.9	177.352
			1396.8	195.668		1302.5	196.996		1577.3	188.292		1549.8	177.355
			1397.3	195.651		1303.2	196.871		1578	188.296		1550.7	177.359
			1397.7	195.634		1303.9	196.744		1578.7	188.301		1551.6	177.362
			1398.2	195.616		1304.5	196.615		1579.5	188.307		1552.5	177.366
			1398.7	195.598		1305.2	196.486		1580.2	188.312		1553.5	177.37
			1399.1	195.579		1305.9	196.355		1581	188.318		1554.4	177.373
			1399.5	195.558		1306.5	196.225		1581.9	188.325		1555.3	177.375
			1400	195.535		1307.2	196.094		1582.8	188.331		1556.2	177.376
			1400.4	195.51		1307.8	195.964		1583.7	188.339		1557.1	177.377
			1400.8	195.486		1308.4	195.831		1584.5	188.346		1558	177.377
			1401.3	195.46		1309.1	195.696		1585.4	188.354		1558.9	177.377
			1401.7	195.435		1309.7	195.558		1586.3	188.362		1559.8	177.377
			1402.2	195.411		1310.3	195.416		1587.1	188.37		1560.8	177.378
			1402.6	195.386		1310.9	195.272		1587.9	188.379		1561.8	177.379
			1403	195.362		1311.5	195.123		1588.7	188.388		1562.8	177.381
			1403.5	195.339		1312.1	194.969		1589.6	188.398		1563.7	177.385
			1404	195.317		1312.7	194.811		1590.4	188.407		1564.6	177.39
			1404.4	195.295		1313.3	194.65		1591.2	188.418		1565.4	177.395
			1404.9	195.273		1314	194.485		1592	188.428		1566.3	177.4
			1405.3	195.25		1314.6	194.318		1592.8	188.439		1567.1	177.404
			1405.7	195.226		1315.2	194.147		1593.7	188.45		1567.9	177.409
			1406.2	195.204		1315.8	193.973		1594.5	188.462		1568.7	177.414
			1406.6	195.181		1316.4	193.794		1595.3	188.474		1569.4	177.419
			1407	195.158		1317	193.611		1596.2	188.486		1570.2	177.424
			1407.4	195.135		1317.6	193.425		1597	188.498		1571	177.43
			1407.9	195.113		1318.2	193.235		1598	188.511		1571.7	177.435
			1408.3	195.09		1318.8	193.043		1599.1	188.524		1572.5	177.441
			1408.7	195.067		1319.4	192.848		1600.5	188.538		1573.3	177.447
			1409.2	195.045		1320	192.651		1602.1	188.551		1574.1	177.454
			1409.6	195.022		1320.6	192.452		1603.7	188.565		1574.9	177.46
			1410.1	194.998		1321.2	192.253		1605.2	188.579		1575.7	177.466
			1410.5	194.974		1321.8	192.053		1606.6	188.593		1576.6	177.472
			1411	194.95		1322.5	191.852		1608	188.607		1577.3	177.478
			1411.5	194.925		1323.1	191.65		1609.4	188.622		1578.1	177.484
			1412	194.901		1323.7	191.446		1610.8	188.636		1578.9	177.49
			1412.5	194.876		1324.4	191.241		1612.1	188.651		1579.6	177.497
			1413	194.853		1325	191.034		1613.4	188.665		1580.4	177.504
			1413.6	194.829		1325.7	190.826		1614.7	188.68		1581.1	177.511
			1414.1	194.805		1326.4	190.618		1616	188.695		1581.9	177.519
			1414.7	194.782		1327	190.408		1617.3	188.709		1582.7	177.527
			1415.2	194.76		1327.7	190.199		1618.5	188.723		1583.4	177.536
			1415.8	194.737		1328.4	189.989		1619.9	188.738		1584.2	177.545
			1416.3	194.714		1329.1	189.779		1621.2	188.752		1585	177.553
			1416.8	194.69		1329.9	189.569		1622.5	188.766		1585.8	177.561
			1417.2	194.666		1330.6	189.36		1623.9	188.781		1586.6	177.569
			1417.7	194.642		1331.2	189.15		1625.3	188.795		1587.5	177.576
			1418.2	194.617		1331.9	188.941		1626.7	188.809		1588.3	177.583
			1418.6	194.591		1332.6	188.732		1628.1	188.823		1589.2	177.589
			1419	194.565		1333.3	188.523		1629.4	188.837		1590	177.595
			1419.5	194.538		1333.9	188.316		1630.6	188.851		1590.8	177.599
			1419.9	194.51		1334.6	188.11		1631.9	188.865		1591.6	177.604
			1420.3	194.482		1335.3	187.907		1633.1	188.878		1592.4	177.607
			1420.7	194.454		1335.9	187.705		1634.3	188.891		1593.3	177.61
			1421.2	194.424		1336.6	187.506		1635.4	188.904		1594.1	177.612
			1421.6	194.393		1337.2	187.31		1636.6	188.916		1595	177.613
			1422	194.362		1337.9	187.117		1637.8	188.929		1595.8	177.612
			1422.4	194.329		1338.5	186.926		1638.9	188.94		1596.7	177.611
			1422.8	194.296		1339.2	186.738		1640.1	188.952		1597.6	177.609
			1423.2	194.262		1339.8	186.55		1641.2	188.963		1598.5	177.606
			1423.6	194.229		1340.5	186.363		1642.4	188.974		1599.3	177.603
			1424.1	194.195		1341.1	186.177		1643.6	188.985		1600.1	177.6
			1424.5	194.161		1341.8	185.991		1644.8	188.996		1600.9	177.596
			1424.9	194.128		1342.4	185.806		1646	189.006		1601.7	177.593
			1425.4	194.095		1343.1	185.62		1647.3	189.017		1602.4	177.59
			1425.8	194.062		1343.8	185.433		1648.6	189.027		1603.1	177.587
			1426.2	194.03		1344.4	185.247		1649.9	189.036		1603.9	177.584
			1426.6	193.998		1345.1	185.061		1651.2	189.046		1604.6	177.58
			1427	193.966		1345.8	184.876		1652.4	189.055		1605.3	177.576
			1427.4	193.934		1346.5	184.69		1653.7	189.064		1606	177.573
			1427.8	193.903		1347.2	184.503		1654.9	189.072		1606.7	177.569
			1428.2	193.872		1347.9	184.316		1656.2	189.081		1607.4	177.566
			1428.6	193.842		1348.6	184.126		1657.4	189.089		1608.1	177.562
			1429.1	193.813		1349.3	183.936		1658.7	189.097		1608.8	177.559
			1429.5	193.785		1350	183.746		1659.9	189.105		1609.6	177.556
			1429.9	193.756		1350.7	183.556		1661.2	189.112		1610.3	177.553
			1430.3	193.728		1351.4	183.367		1662.5	189.119		1611.1	177.55
			1430.7	193.701		1352	183.18		1663.8	189.125		1611.8	177.546
			1431.1	193.674		1352.7	182.994		1665	189.131		1612.6	177.543
			1431.6	193.647		1353.4	182.809		1666.3	189.136		1613.3	177.538
			1432	193.62		1354.1	182.628		1667.4	189.141		1614	177.534
			1432.5	193.594		1354.8	182.449		1668.6	189.145		1614.7	177.528
			1433	193.568		1355.5	182.272		1669.7	189.148		1615.4	177.523
			1433.5	193.543		1356.2	182.095		1670.8	189.151		1616	177.518
			1434	193.519		1356.9	181.918		1671.9	189.154		1616.7	177.513
			1434.5	193.496		1357.5	181.742		1673	189.155		1617.4	177.508
			1435	193.474		1358.2	181.568		1674	189.157		1618.1	177.502
			1435.5	193.453		1358.9	181.395		1675.1	189.157		1618.8	177.497
			1436	193.432		1359.6	181.224		1676.2	189.157		1619.5	177.492
			1436.5	193.413		1360.2	181.053		1677.2	189.156		1620.3	177.487
			1437	193.394		1360.9	180.884		1678.3	189.155		1621	177.482
			1437.5	193.376		1361.5	180.717		1679.4	189.153		1621.8	177.477
			1438	193.357		1362.2	180.551		1680.5	189.151		1622.6	177.472
			1438.5	193.339		1362.8	180.387		1681.6	189.148		1623.3	177.467
[truncated: 1,001 more rows]
