# Supplementary material for: Numerical Simulation of Dry Granular Flow Impacting a Rigid Wall Using the Discrete Element Method
Source: PLoS One. 2016 Aug 11;11(8):e0160756. doi: 10.1371/journal.pone.0160756 (PMC4981468; doi:10.1371/journal.pone.0160756)
Supplement: S2 File — (XLS) [file pone.0160756.s002.xls]

## Sheet: Sheet1
0.036389	-0.000951282	0.000269609	0.000322625	-1.872e-07	1.39574e-11	3.43481e-13
0.11549	-0.000968522	0.00027568	0.000329461	-1.91449e-07	1.42737e-11	3.51265e-13
0.24433	-0.000985986	0.000281838	0.000336393	-1.95761e-07	1.45947e-11	3.59163e-13
0.4542	-0.00100369	0.000288091	0.000343428	-2.00138e-07	1.49205e-11	3.67181e-13
0.79606	-0.00102163	0.000294439	0.000350567	-2.04583e-07	1.52513e-11	3.75323e-13
1.3529	-0.00103981	0.000300889	0.000357817	-2.09098e-07	1.55875e-11	3.83595e-13
2.26	-0.00105825	0.000307438	0.000365175	-2.13684e-07	1.59288e-11	3.91995e-13
3.7374	-0.00107693	0.000314083	0.000372637	-2.18337e-07	1.62751e-11	4.00517e-13
6.1441	-0.00109585	0.000320827	0.000380207	-2.23059e-07	1.66266e-11	4.09167e-13
9.154	-0.00111503	0.000327671	0.000387887	-2.27852e-07	1.69833e-11	4.17946e-13
12.164	-0.00113444	0.000334601	0.000395677	-2.32683e-07	1.70693e-11	3.62204e-13
15.174	-0.00115406	0.0003416	0.000403581	-2.37506e-07	1.64887e-11	1.49207e-13
18.184	-0.00117389	0.000348655	0.000411599	-2.42293e-07	1.50027e-11	-2.76983e-13
21.194	-0.00119391	0.000355745	0.000419732	-2.47e-07	1.22556e-11	-9.99658e-13
24.203	-0.0012141	0.000362867	0.000427982	-2.51611e-07	8.08168e-12	-2.0577e-12
27.213	-0.00123448	0.00037002	0.000436354	-2.5612e-07	2.42769e-12	-3.46358e-12
30.223	-0.00125502	0.000377185	0.00044485	-2.60483e-07	-5.0947e-12	-5.30829e-12
33.233	-0.0012757	0.000384345	0.000453473	-2.64658e-07	-1.48535e-11	-7.67805e-12
36.243	-0.00129654	0.0003915	0.000462222	-2.68641e-07	-2.68699e-11	-1.05778e-11
39.253	-0.00131751	0.000398647	0.000471096	-2.72431e-07	-4.11502e-11	-1.4009e-11
42.263	-0.00133862	0.000405781	0.000480097	-2.76015e-07	-5.78026e-11	-1.7997e-11
45.273	-0.00135988	0.000412903	0.000489224	-2.79395e-07	-7.68126e-11	-2.25385e-11
48.283	-0.00138125	0.000419994	0.000498478	-2.82527e-07	-9.85633e-11	-2.77231e-11
51.293	-0.00140272	0.000427028	0.000507865	-2.85345e-07	-1.23605e-10	-3.36799e-11
54.302	-0.00142427	0.000433998	0.000517384	-2.87833e-07	-1.52082e-10	-4.04423e-11
57.312	-0.00144589	0.000440889	0.000527035	-2.89961e-07	-1.84237e-10	-4.80676e-11
60.322	-0.00146759	0.000447705	0.000536821	-2.91731e-07	-2.20086e-10	-5.65593e-11
63.332	-0.00148939	0.00045446	0.000546746	-2.9317e-07	-2.594e-10	-6.5864e-11
66.342	-0.00151127	0.000461149	0.000556811	-2.94266e-07	-3.02307e-10	-7.60115e-11
69.352	-0.00153326	0.000467775	0.000567021	-2.95016e-07	-3.48847e-10	-8.70113e-11
72.362	-0.00155534	0.000474336	0.000577376	-2.95415e-07	-3.99066e-10	-9.88742e-11
75.372	-0.00157751	0.000480821	0.000587876	-2.95441e-07	-4.53142e-10	-1.11642e-10
78.382	-0.00159978	0.000487238	0.000598524	-2.95107e-07	-5.10994e-10	-1.25296e-10
81.391	-0.00162215	0.000493594	0.000609323	-2.94425e-07	-5.72522e-10	-1.39811e-10
84.401	-0.00164461	0.000499867	0.000620273	-2.93343e-07	-6.38173e-10	-1.55295e-10
87.411	-0.00166712	0.000506029	0.000631379	-2.91794e-07	-7.08516e-10	-1.71878e-10
90.421	-0.00168967	0.000512065	0.000642641	-2.89743e-07	-7.83856e-10	-1.89633e-10
93.431	-0.00171223	0.000517948	0.000654061	-2.87129e-07	-8.64695e-10	-2.08678e-10
96.441	-0.0017348	0.00052368	0.000665642	-2.83949e-07	-9.51075e-10	-2.29022e-10
99.451	-0.00175741	0.000529273	0.000677387	-2.8023e-07	-1.0428e-09	-2.5062e-10
102.46	-0.00178003	0.000534708	0.000689298	-2.75924e-07	-1.14026e-09	-2.73563e-10
105.47	-0.00180265	0.000539973	0.000701377	-2.70998e-07	-1.24377e-09	-2.97922e-10
108.4	-0.00182527	0.000545073	0.000713625	-2.65469e-07	-1.35316e-09	-3.23663e-10
111.28	-0.00184791	0.000550015	0.000726039	-2.5935e-07	-1.46832e-09	-3.50757e-10
114.07	-0.00187057	0.000554805	0.00073862	-2.52657e-07	-1.58913e-09	-3.79173e-10
116.8	-0.00189327	0.00055946	0.000751367	-2.45429e-07	-1.71526e-09	-4.08839e-10
119.49	-0.001916	0.000563968	0.000764282	-2.37638e-07	-1.84693e-09	-4.39804e-10
122.12	-0.00193874	0.000568312	0.000777365	-2.29241e-07	-1.98452e-09	-4.72157e-10
124.64	-0.00196149	0.000572499	0.000790617	-2.20257e-07	-2.12787e-09	-5.0586e-10
127.08	-0.00198427	0.000576532	0.000804036	-2.10692e-07	-2.27693e-09	-5.40901e-10
129.48	-0.00200706	0.000580404	0.000817625	-2.00531e-07	-2.43182e-09	-5.77312e-10
131.84	-0.00202988	0.000584119	0.000831387	-1.89772e-07	-2.59259e-09	-6.15099e-10
134.14	-0.00205271	0.000587669	0.000845325	-1.784e-07	-2.75937e-09	-6.54296e-10
136.35	-0.00207555	0.000591045	0.000859441	-1.66388e-07	-2.9324e-09	-6.9496e-10
138.53	-0.00209841	0.000594255	0.000873734	-1.53755e-07	-3.11151e-09	-7.3705e-10
140.68	-0.0021213	0.000597311	0.000888203	-1.4053e-07	-3.29647e-09	-7.8051e-10
142.86	-0.00214421	0.000600212	0.00090285	-1.26709e-07	-3.4873e-09	-8.25346e-10
144.92	-0.00216717	0.000602963	0.000917674	-1.12303e-07	-3.68393e-09	-8.71543e-10
146.96	-0.00219014	0.000605543	0.000932679	-9.72601e-08	-3.88679e-09	-9.19202e-10
148.97	-0.0022131	0.000607917	0.00094787	-8.14961e-08	-4.09661e-09	-9.68493e-10
150.87	-0.00223602	0.000610073	0.000963249	-6.49795e-08	-4.31367e-09	-1.01948e-09
152.8	-0.00225889	0.000611987	0.000978817	-4.76568e-08	-4.53841e-09	-1.07227e-09
154.74	-0.00228169	0.000613649	0.000994577	-2.94996e-08	-4.77109e-09	-1.12692e-09
156.68	-0.00230443	0.00061506	0.00101053	-1.05069e-08	-5.01172e-09	-1.18343e-09
158.55	-0.00232707	0.000616192	0.00102669	9.38678e-09	-5.26087e-09	-1.24194e-09
160.38	-0.00234961	0.000617021	0.00104304	3.02451e-08	-5.5191e-09	-1.30258e-09
162.24	-0.00237203	0.000617554	0.0010596	5.20466e-08	-5.7862e-09	-1.3653e-09
164.07	-0.00239437	0.000617804	0.00107635	7.47599e-08	-6.06192e-09	-1.43004e-09
165.71	-0.00241662	0.000617774	0.00109331	9.83838e-08	-6.34626e-09	-1.4968e-09
167.32	-0.00243879	0.000617477	0.00111047	1.22887e-07	-6.63894e-09	-1.56552e-09
168.92	-0.00246087	0.000616891	0.00112783	1.4832e-07	-6.9404e-09	-1.63629e-09
170.51	-0.00248282	0.00061598	0.0011454	1.74771e-07	-7.25141e-09	-1.7093e-09
172.11	-0.00250464	0.000614746	0.00116317	2.02236e-07	-7.57192e-09	-1.78454e-09
173.71	-0.00252632	0.000613186	0.00118116	2.30726e-07	-7.90203e-09	-1.86203e-09
175.31	-0.00254788	0.000611303	0.00119936	2.60233e-07	-8.24169e-09	-1.94176e-09
176.93	-0.00256935	0.000609124	0.00121777	2.90703e-07	-8.59047e-09	-2.02363e-09
178.55	-0.00259072	0.000606647	0.00123639	3.22141e-07	-8.94841e-09	-2.10764e-09
180.22	-0.00261201	0.000603877	0.00125524	3.54545e-07	-9.31551e-09	-2.19381e-09
181.91	-0.00263323	0.000600824	0.0012743	3.87888e-07	-9.69157e-09	-2.28207e-09
183.57	-0.00265438	0.000597493	0.00129358	4.22161e-07	-1.00765e-08	-2.37241e-09
185.22	-0.00267548	0.000593902	0.00131309	4.57329e-07	-1.047e-08	-2.46477e-09
186.85	-0.00269657	0.000590072	0.00133281	4.93346e-07	-1.08718e-08	-2.55905e-09
188.42	-0.00271762	0.000585986	0.00135277	5.30252e-07	-1.12821e-08	-2.65535e-09
189.97	-0.00273861	0.000581617	0.00137295	5.68111e-07	-1.17015e-08	-2.75378e-09
191.52	-0.00275954	0.000576964	0.00139336	6.06934e-07	-1.21301e-08	-2.85436e-09
193.05	-0.00278039	0.000572008	0.001414	6.4676e-07	-1.25683e-08	-2.95719e-09
194.58	-0.00280117	0.000566762	0.00143488	6.87565e-07	-1.30159e-08	-3.06222e-09
196.09	-0.00282192	0.000561258	0.001456	7.29283e-07	-1.34723e-08	-3.16931e-09
197.52	-0.00284264	0.000555485	0.00147735	7.71938e-07	-1.39377e-08	-3.27853e-09
198.92	-0.00286332	0.000549442	0.00149895	8.15539e-07	-1.44122e-08	-3.38988e-09
200.32	-0.00288397	0.000543129	0.00152079	8.60086e-07	-1.48959e-08	-3.50338e-09
201.73	-0.00290457	0.000536532	0.00154287	9.05609e-07	-1.5389e-08	-3.61907e-09
203.13	-0.00292512	0.000529657	0.00156519	9.52101e-07	-1.58914e-08	-3.73695e-09
204.51	-0.00294564	0.000522507	0.00158777	9.99551e-07	-1.6403e-08	-3.857e-09
205.88	-0.00296611	0.000515072	0.00161058	1.04799e-06	-1.69241e-08	-3.97927e-09
207.32	-0.00298653	0.000507344	0.00163365	1.09743e-06	-1.74549e-08	-4.10381e-09
208.79	-0.0030069	0.000499316	0.00165696	1.14789e-06	-1.79955e-08	-4.23065e-09
210.25	-0.00302719	0.000490977	0.00168053	1.19941e-06	-1.85461e-08	-4.35983e-09
211.71	-0.00304742	0.000482341	0.00170435	1.25194e-06	-1.91065e-08	-4.49132e-09
213.16	-0.00306764	0.000473431	0.00172843	1.30545e-06	-1.96764e-08	-4.62502e-09
214.6	-0.00308783	0.000464253	0.00175276	1.35992e-06	-2.02556e-08	-4.76091e-09
216.04	-0.00310803	0.000454821	0.00177735	1.41533e-06	-2.08439e-08	-4.89895e-09
217.47	-0.00312823	0.000445133	0.00180221	1.47168e-06	-2.14415e-08	-5.03915e-09
218.89	-0.00314842	0.000435176	0.00182732	1.529e-06	-2.20485e-08	-5.18156e-09
220.31	-0.00316862	0.000424963	0.0018527	1.58726e-06	-2.26647e-08	-5.32613e-09
221.72	-0.00318883	0.000414504	0.00187835	1.64645e-06	-2.329e-08	-5.47284e-09
223.11	-0.00320904	0.000403772	0.00190426	1.70663e-06	-2.3925e-08	-5.6218e-09
224.45	-0.0032292	0.000392736	0.00193045	1.76788e-06	-2.45702e-08	-5.77317e-09
225.78	-0.00324929	0.000381374	0.00195691	1.83024e-06	-2.52261e-08	-5.92706e-09
227.12	-0.00326929	0.000369648	0.00198365	1.8938e-06	-2.58935e-08	-6.08362e-09
228.46	-0.00328918	0.000357557	0.00201067	1.95858e-06	-2.65724e-08	-6.2429e-09
229.8	-0.00330898	0.000345111	0.00203796	2.02455e-06	-2.72627e-08	-6.40484e-09
231.14	-0.00332865	0.000332279	0.00206555	2.09178e-06	-2.79651e-08	-6.5696e-09
232.5	-0.00334818	0.000319036	0.00209342	2.16034e-06	-2.86799e-08	-6.73729e-09
233.85	-0.00336757	0.000305384	0.00212159	2.23023e-06	-2.94073e-08	-6.90793e-09
235.19	-0.00338681	0.000291318	0.00215004	2.30145e-06	-3.01473e-08	-7.08152e-09
236.51	-0.0034059	0.000276837	0.00217879	2.37401e-06	-3.09e-08	-7.25808e-09
237.82	-0.00342486	0.000261949	0.00220783	2.4479e-06	-3.16652e-08	-7.43759e-09
239.11	-0.00344364	0.000246624	0.00223717	2.52319e-06	-3.24436e-08	-7.62018e-09
240.39	-0.00346222	0.000230819	0.00226681	2.59997e-06	-3.3236e-08	-7.80606e-09
241.66	-0.00348058	0.000214527	0.00229675	2.67827e-06	-3.40426e-08	-7.99526e-09
242.93	-0.0034987	0.00019773	0.002327	2.75813e-06	-3.48637e-08	-8.18788e-09
244.18	-0.0035166	0.000180438	0.00235756	2.83953e-06	-3.56993e-08	-8.38387e-09
245.43	-0.00353432	0.00016269	0.00238842	2.92239e-06	-3.65485e-08	-8.58307e-09
246.66	-0.00355186	0.000144486	0.0024196	3.0067e-06	-3.74116e-08	-8.78551e-09
247.9	-0.00356924	0.000125836	0.00245109	3.09246e-06	-3.82882e-08	-8.99113e-09
249.12	-0.00358648	0.000106746	0.0024829	3.17964e-06	-3.91783e-08	-9.19992e-09
250.35	-0.00360354	8.72054e-05	0.00251502	3.26828e-06	-4.00823e-08	-9.41193e-09
251.62	-0.00362048	6.72364e-05	0.00254746	3.35833e-06	-4.09995e-08	-9.62709e-09
252.93	-0.0036373	4.68626e-05	0.00258022	3.44974e-06	-4.19298e-08	-9.84528e-09
254.23	-0.00365399	2.60523e-05	0.00261331	3.54258e-06	-4.28736e-08	-1.00667e-08
255.5	-0.00367049	4.76479e-06	0.00264672	3.63695e-06	-4.38319e-08	-1.02914e-08
256.74	-0.00368679	-1.70175e-05	0.00268046	3.73289e-06	-4.4805e-08	-1.05196e-08
257.96	-0.00370285	-3.93315e-05	0.00271454	3.83049e-06	-4.57936e-08	-1.07515e-08
259.16	-0.00371869	-6.2165e-05	0.00274895	3.92973e-06	-4.67975e-08	-1.0987e-08
260.35	-0.00373435	-8.54811e-05	0.00278369	4.03052e-06	-4.78161e-08	-1.12259e-08
261.59	-0.00374981	-0.000109303	0.00281878	4.13292e-06	-4.88499e-08	-1.14684e-08
262.89	-0.00376505	-0.000133644	0.00285421	4.23697e-06	-4.98991e-08	-1.17144e-08
264.2	-0.00377972	-0.000158235	0.00288996	4.34403e-06	-5.09936e-08	-1.1955e-08
265.44	-0.00379327	-0.000182707	0.002926	4.45611e-06	-5.21763e-08	-1.21771e-08
266.65	-0.00380541	-0.000206825	0.00296231	4.57439e-06	-5.34729e-08	-1.23728e-08
267.91	-0.00381567	-0.000230233	0.00299888	4.70062e-06	-5.49216e-08	-1.25303e-08
269.2	-0.00382382	-0.000252792	0.00303567	4.83566e-06	-5.65407e-08	-1.26442e-08
270.49	-0.00382977	-0.000274472	0.0030727	4.97985e-06	-5.83365e-08	-1.27129e-08
271.77	-0.00383299	-0.000294905	0.00310993	5.13512e-06	-6.0351e-08	-1.27235e-08
273.06	-0.00383299	-0.00031375	0.00314734	5.30336e-06	-6.26242e-08	-1.26641e-08
274.33	-0.00382974	-0.00033098	0.00318492	5.48464e-06	-6.51584e-08	-1.25338e-08
275.61	-0.00382327	-0.000346571	0.00322268	5.67898e-06	-6.79538e-08	-1.23325e-08
276.88	-0.00381343	-0.000360423	0.00326061	5.88691e-06	-7.10224e-08	-1.20565e-08
278.15	-0.00380023	-0.000372549	0.00329872	6.10837e-06	-7.43626e-08	-1.17063e-08
279.42	-0.00378318	-0.000382581	0.00333697	6.34527e-06	-7.80158e-08	-1.12694e-08
280.69	-0.00376153	-0.000389998	0.00337533	6.60039e-06	-8.20416e-08	-1.07275e-08
281.95	-0.00373511	-0.000394656	0.00341378	6.87441e-06	-8.64554e-08	-1.0076e-08
283.21	-0.00370361	-0.000396314	0.0034523	7.16856e-06	-9.12835e-08	-9.30669e-09
284.47	-0.00366697	-0.000394977	0.0034909	7.48295e-06	-9.6528e-08	-8.41927e-09
285.73	-0.00362549	-0.000390891	0.0035296	7.81651e-06	-1.02165e-07	-7.42135e-09
286.98	-0.00357897	-0.000383948	0.00356839	8.16991e-06	-1.08208e-07	-6.30881e-09
288.24	-0.00352734	-0.000374133	0.00360727	8.54342e-06	-1.14662e-07	-5.08043e-09
289.49	-0.00347053	-0.000361404	0.00364624	8.93727e-06	-1.21533e-07	-3.73471e-09
290.74	-0.00340832	-0.000345585	0.00368529	9.35233e-06	-1.28839e-07	-2.26577e-09
291.98	-0.0033408	-0.000326771	0.00372442	9.78826e-06	-1.36572e-07	-6.7633e-10
293.21	-0.00326809	-0.000305078	0.00376366	1.02446e-05	-1.44722e-07	1.03014e-09
294.45	-0.00318959	-0.000280072	0.00380296	1.07236e-05	-1.53336e-07	2.86849e-09
295.7	-0.00310455	-0.00025121	0.00384228	1.1228e-05	-1.62478e-07	4.85741e-09
296.95	-0.00301258	-0.000218198	0.00388159	1.17595e-05	-1.72178e-07	7.00698e-09
298.2	-0.00291301	-0.000180546	0.00392087	1.23205e-05	-1.82493e-07	9.3338e-09
299.45	-0.00280576	-0.000138232	0.0039601	1.29112e-05	-1.93426e-07	1.18392e-08
300.65	-0.00269109	-9.14714e-05	0.00399931	1.35307e-05	-2.04956e-07	1.45165e-08
301.85	-0.00256846	-3.9885e-05	0.00403847	1.41811e-05	-2.17127e-07	1.73787e-08
303.04	-0.00243746	1.6805e-05	0.00407755	1.48638e-05	-2.29972e-07	2.04358e-08
304.22	-0.0022983	7.84568e-05	0.00411657	1.55781e-05	-2.43473e-07	2.36828e-08
305.39	-0.00215115	0.00014497	0.00415554	1.63233e-05	-2.57619e-07	2.71157e-08
306.57	-0.00199619	0.000216212	0.00419448	1.70989e-05	-2.72394e-07	3.07303e-08
307.75	-0.00183384	0.000291881	0.00423342	1.79033e-05	-2.87766e-07	3.45161e-08
308.91	-0.0016638	0.000372189	0.00427233	1.87375e-05	-3.03757e-07	3.84804e-08
310.07	-0.00148559	0.000457494	0.0043112	1.96035e-05	-3.20409e-07	4.26354e-08
311.22	-0.00129942	0.000547645	0.00435003	2.05004e-05	-3.37703e-07	4.6976e-08
312.37	-0.00110537	0.000642603	0.00438883	2.14279e-05	-3.55635e-07	5.15003e-08
313.51	-0.000903254	0.000742483	0.0044276	2.23868e-05	-3.74218e-07	5.62129e-08
314.68	-0.00069302	0.000847287	0.00446634	2.33772e-05	-3.93457e-07	6.11144e-08
315.86	-0.000474457	0.000957155	0.00450503	2.44e-05	-4.13367e-07	6.62098e-08
317.06	-0.000247245	0.0010723	0.00454366	2.54563e-05	-4.33975e-07	7.15067e-08
318.26	-1.16056e-05	0.00119255	0.00458225	2.65452e-05	-4.55262e-07	7.69997e-08
319.45	0.000232116	0.0013177	0.00462082	2.76656e-05	-4.77202e-07	8.26806e-08
320.63	0.000483973	0.00144777	0.00465937	2.88176e-05	-4.99798e-07	8.85506e-08
321.81	0.000743875	0.00158267	0.00469792	3.0001e-05	-5.23044e-07	9.46072e-08
322.97	0.0010124	0.00172282	0.00473641	3.12177e-05	-5.46984e-07	1.00865e-07
324.14	0.00129051	0.00186892	0.00477481	3.24716e-05	-5.717e-07	1.07347e-07
325.3	0.00157858	0.00202121	0.00481308	3.3764e-05	-5.9722e-07	1.14063e-07
326.45	0.00187721	0.00218013	0.00485121	3.50972e-05	-6.23592e-07	1.21028e-07
327.6	0.00218672	0.00234592	0.00488915	3.64724e-05	-6.50845e-07	1.28249e-07
328.75	0.00250717	0.00251858	0.00492693	3.78897e-05	-6.78981e-07	1.35729e-07
329.89	0.00283931	0.00269864	0.0049645	3.9352e-05	-7.0806e-07	1.43484e-07
331.04	0.00318386	0.00288662	0.0050018	4.08621e-05	-7.38143e-07	1.51533e-07
332.22	0.00354058	0.00308235	0.00503887	4.2419e-05	-7.69209e-07	1.59871e-07
333.39	0.00390911	0.00328558	0.00507573	4.40214e-05	-8.01229e-07	1.68487e-07
334.57	0.00428944	0.00349629	0.00511237	4.56693e-05	-8.34204e-07	1.77383e-07
335.72	0.00468121	0.00371424	0.00514883	4.73613e-05	-8.68104e-07	1.86549e-07
336.86	0.00508502	0.00393983	0.00518507	4.90997e-05	-9.02976e-07	1.96e-07
337.98	0.00550187	0.00417379	0.00522104	5.08883e-05	-9.38904e-07	2.0576e-07
339.08	0.0059317	0.00441608	0.00525673	5.27268e-05	-9.75882e-07	2.15829e-07
340.18	0.00637465	0.00466679	0.00529214	5.46159e-05	-1.01392e-06	2.26209e-07
341.27	0.00683067	0.00492586	0.00532729	5.65551e-05	-1.05302e-06	2.369e-07
342.36	0.0072992	0.00519284	0.00536221	5.85426e-05	-1.09312e-06	2.47885e-07
343.44	0.00778033	0.00546777	0.00539689	6.05785e-05	-1.13425e-06	2.59167e-07
344.51	0.00827407	0.00575062	0.00543135	6.26628e-05	-1.17638e-06	2.70747e-07
345.59	0.00878015	0.00604118	0.0054656	6.47947e-05	-1.21952e-06	2.82616e-07
346.67	0.00929847	0.00633937	0.00549965	6.69736e-05	-1.26363e-06	2.94772e-07
347.76	0.00982866	0.00664491	0.00553354	6.91982e-05	-1.3087e-06	3.07205e-07
348.84	0.0103703	0.00695741	0.00556729	7.14668e-05	-1.35469e-06	3.19904e-07
349.93	0.0109238	0.00727721	0.00560087	7.3781e-05	-1.40163e-06	3.3288e-07
351.02	0.0114898	0.00760483	0.00563425	7.61437e-05	-1.44958e-06	3.46151e-07
352.11	0.0120686	0.00794034	0.00566742	7.85553e-05	-1.49856e-06	3.5972e-07
353.2	0.0126607	0.00828408	0.00570036	8.10175e-05	-1.54859e-06	3.73598e-07
354.29	0.0132656	0.00863584	0.00573308	8.35294e-05	-1.59967e-06	3.87779e-07
355.36	0.0138828	0.00899507	0.00576564	8.60885e-05	-1.65172e-06	4.02244e-07
356.43	0.0145126	0.00936198	0.00579801	8.86958e-05	-1.70478e-06	4.17002e-07
357.48	0.0151551	0.00973664	0.0058302	9.13518e-05	-1.75886e-06	4.32055e-07
358.53	0.0158103	0.010119	0.00586221	9.40565e-05	-1.81396e-06	4.47403e-07
359.57	0.0164786	0.0105094	0.00589402	9.68112e-05	-1.8701e-06	4.63053e-07
360.61	0.0171597	0.0109078	0.00592564	9.96156e-05	-1.92727e-06	4.79005e-07
361.64	0.0178537	0.0113139	0.00595707	0.000102469	-1.98547e-06	4.95256e-07
362.68	0.0185609	0.0117282	0.00598831	0.000105373	-2.04473e-06	5.11813e-07
363.71	0.0192814	0.0121507	0.00601933	0.000108329	-2.10506e-06	5.28682e-07
364.75	0.0200156	0.0125815	0.00605014	0.000111337	-2.16648e-06	5.45869e-07
365.79	0.0207636	0.013021	0.00608072	0.000114398	-2.22902e-06	5.6338e-07
366.84	0.0215253	0.0134688	0.00611108	0.000117511	-2.29264e-06	5.81208e-07
367.9	0.0223001	0.0139246	0.00614126	0.000120675	-2.35732e-06	5.9934e-07
368.95	0.0230879	0.0143883	0.00617128	0.000123889	-2.42304e-06	6.17775e-07
369.99	0.0238886	0.0148596	0.00620116	0.000127152	-2.48977e-06	6.36504e-07
371.03	0.0247021	0.0153387	0.00623088	0.000130464	-2.55754e-06	6.5553e-07
372.07	0.0255288	0.0158257	0.00626044	0.000133827	-2.62635e-06	6.7486e-07
373.1	0.0263684	0.0163204	0.00628986	0.000137239	-2.6962e-06	6.94488e-07
374.14	0.0272208	0.0168227	0.00631915	0.000140701	-2.76706e-06	7.14409e-07
375.17	0.0280866	0.017333	0.00634827	0.000144213	-2.839e-06	7.3464e-07
376.2	0.0289668	0.0178521	0.00637718	0.000147781	-2.91208e-06	7.55203e-07
377.24	0.0298618	0.0183803	0.00640583	0.000151406	-2.98635e-06	7.76113e-07
378.28	0.0307727	0.0189184	0.00643417	0.000155091	-3.06189e-06	7.97393e-07
379.31	0.0316996	0.0194663	0.0064622	0.000158838	-3.13871e-06	8.19047e-07
380.35	0.0326423	0.020024	0.00648994	0.000162645	-3.21679e-06	8.41069e-07
381.39	0.0336016	0.0205921	0.00651733	0.000166515	-3.2962e-06	8.6348e-07
382.42	0.0345783	0.021171	0.00654434	0.000170452	-3.37701e-06	8.86297e-07
383.45	0.0355722	0.0217607	0.00657097	0.000174455	-3.4592e-06	9.0952e-07
384.48	0.0365837	0.0223613	0.00659722	0.000178525	-3.54279e-06	9.33152e-07
385.5	0.0376126	0.0229729	0.00662308	0.000182661	-3.62778e-06	9.57194e-07
386.51	0.038659	0.0235954	0.00664857	0.000186865	-3.71416e-06	9.81644e-07
387.53	0.0397235	0.0242292	0.00667364	0.000191137	-3.802e-06	1.00652e-06
388.54	0.0408073	0.0248753	0.00669824	0.000195483	-3.89139e-06	1.03185e-06
389.56	0.0419106	0.0255338	0.00672233	0.000199904	-3.98235e-06	1.05764e-06
390.57	0.043034	0.0262051	0.00674591	0.000204401	-4.07492e-06	1.08391e-06
391.59	0.0441772	0.0268889	0.00676898	0.000208974	-4.16907e-06	1.11064e-06
392.61	0.0453394	0.0275846	0.00679161	0.000213619	-4.26475e-06	1.13782e-06
393.64	0.0465206	0.0282923	0.00681379	0.000218337	-4.36195e-06	1.16544e-06
394.66	0.0477206	0.0290116	0.00683555	0.000223126	-4.46065e-06	1.1935e-06
395.67	0.0489394	0.0297427	0.00685689	0.000227987	-4.56085e-06	1.222e-06
396.67	0.0501773	0.0304857	0.0068778	0.000232921	-4.66258e-06	1.25095e-06
397.66	0.0514337	0.0312401	0.00689831	0.000237926	-4.76579e-06	1.28033e-06
398.62	0.0527081	0.0320056	0.00691846	0.000242999	-4.87044e-06	1.31013e-06
399.58	0.0540015	0.0327829	0.0069382	0.000248145	-4.9766e-06	1.34037e-06
400.53	0.0553148	0.0335726	0.00695748	0.000253367	-5.08435e-06	1.37108e-06
401.49	0.0566486	0.0343751	0.00697625	0.000258666	-5.19374e-06	1.40227e-06
402.44	0.0580038	0.0351912	0.00699447	0.000264048	-5.30485e-06	1.43396e-06
403.39	0.0593802	0.0360206	0.00701215	0.00026951	-5.41765e-06	1.46615e-06
404.34	0.0607769	0.0368627	0.00702936	0.000275049	-5.53208e-06	1.49882e-06
405.29	0.0621947	0.037718	0.00704605	0.000280669	-5.64819e-06	1.53197e-06
406.23	0.0636339	0.0385866	0.00706221	0.00028637	-5.76601e-06	1.56563e-06
407.18	0.0650905	0.0394658	0.00707728	0.000292139	-5.88596e-06	1.60008e-06
408.12	0.0665593	0.0403515	0.00709044	0.000297959	-6.00869e-06	1.63574e-06
409.07	0.0680369	0.0412412	0.00710123	0.000303818	-6.13455e-06	1.67286e-06
410.01	0.0695179	0.0421309	0.00710893	0.000309698	-6.26407e-06	1.7118e-06
410.95	0.0710006	0.0430193	0.0071132	0.000315593	-6.39756e-06	1.75275e-06
411.88	0.0724849	0.0439063	0.00711387	0.000321503	-6.53515e-06	1.79579e-06
412.82	0.0739654	0.0447879	0.00711016	0.00032741	-6.67745e-06	1.84131e-06
413.76	0.0754372	0.0456605	0.0071013	0.000333298	-6.82506e-06	1.88973e-06
414.7	0.0769002	0.0465238	0.00708726	0.000339166	-6.97801e-06	1.94105e-06
415.63	0.0783536	0.0473775	0.00706806	0.000345012	-7.13628e-06	1.99527e-06
416.56	0.0797963	0.0482204	0.00704347	0.000350831	-7.30004e-06	2.05251e-06
417.48	0.0812285	0.0490528	0.00701352	0.000356625	-7.46928e-06	2.11276e-06
418.39	0.0826447	0.0498707	0.00697744	0.000362375	-7.64459e-06	2.17641e-06
419.3	0.0840376	0.0506685	0.0069341	0.000368057	-7.82686e-06	2.24406e-06
420.21	0.085405	0.0514445	0.00688321	0.000373662	-8.01628e-06	2.31584e-06
421.12	0.0867433	0.0521963	0.00682429	0.00037918	-8.21324e-06	2.39202e-06
422.03	0.088053	0.0529239	0.00675729	0.000384611	-8.4178e-06	2.47261e-06
422.95	0.0893379	0.0536303	0.00668262	0.000389969	-8.62966e-06	2.5574e-06
423.87	0.0905967	0.0543145	0.00660001	0.000395249	-8.84906e-06	2.64654e-06
424.79	0.0918295	0.0549765	0.00650933	0.000400453	-9.07612e-06	2.74008e-06
425.72	0.0930358	0.0556159	0.00641048	0.000405579	-9.31092e-06	2.83807e-06
426.65	0.094213	0.0562307	0.00630313	0.000410617	-9.55372e-06	2.94069e-06
427.58	0.0953627	0.0568222	0.00618739	0.000415573	-9.80445e-06	3.04789e-06
428.51	0.0964869	0.0573919	0.00606345	0.000420455	-1.0063e-05	3.15955e-06
429.44	0.0975793	0.0579349	0.0059304	0.000425242	-1.033e-05	3.27616e-06
430.37	0.098632	0.0584455	0.00578709	0.000429905	-1.06065e-05	3.39831e-06
431.28	0.0996407	0.0589204	0.00563291	0.000434432	-1.08928e-05	3.52632e-06
432.19	0.100598	0.0593543	0.00546683	0.000438798	-1.11897e-05	3.66071e-06
433.08	0.101505	0.059747	0.00528876	0.000443003	-1.14974e-05	3.80154e-06
433.97	0.102363	0.0601013	0.00509905	0.000447059	-1.18156e-05	3.94862e-06
434.86	0.103169	0.060413	0.00489689	0.000450948	-1.21449e-05	4.10237e-06
435.74	0.103917	0.0606791	0.00468166	0.000454656	-1.24858e-05	4.2631e-06
436.62	0.104611	0.0609013	0.00445367	0.000458191	-1.28382e-05	4.43067e-06
437.51	0.105251	0.0610805	0.00421319	0.000461557	-1.32016e-05	4.60495e-06
438.39	0.105839	0.0612183	0.00396046	0.000464762	-1.35761e-05	4.78578e-06
439.29	0.106381	0.0613179	0.00369613	0.000467821	-1.39611e-05	4.97286e-06
440.18	0.106872	0.0613772	0.00341977	0.000470722	-1.43569e-05	5.16641e-06
441.07	0.107308	0.0613922	0.00313059	0.00047345	-1.47642e-05	5.36683e-06
441.95	0.107692	0.0613645	0.00282895	0.000476012	-1.51826e-05	5.57394e-06
442.84	0.108023	0.0612947	0.00251496	0.000478409	-1.56122e-05	5.78769e-06
443.72	0.1083	0.0611814	0.00218832	0.000480636	-1.6053e-05	6.00823e-06
444.6	0.108523	0.061025	0.00184895	0.000482696	-1.65053e-05	6.23559e-06
445.48	0.108691	0.060824	0.00149654	0.00048458	-1.69693e-05	6.46995e-06
446.35	0.108801	0.0605762	0.00113058	0.000486281	-1.74453e-05	6.71156e-06
447.22	0.108855	0.0602834	0.000751419	0.000487805	-1.79332e-05	6.96025e-06
448.09	0.108856	0.0599479	0.000359575	0.000489164	-1.84325e-05	7.21575e-06
448.96	0.108804	0.0595696	-4.50351e-05	0.000490358	-1.89432e-05	7.4781e-06
449.83	0.1087	0.0591494	-0.000462277	0.00049139	-1.94654e-05	7.74724e-06
450.69	0.108539	0.0586829	-0.000893028	0.000492241	-1.99997e-05	8.02362e-06
451.56	0.10831	0.0581628	-0.00133879	0.000492877	-2.05472e-05	8.30802e-06
452.42	0.10801	0.0575861	-0.00180011	0.000493287	-2.11083e-05	8.60071e-06
453.28	0.107633	0.0569483	-0.00227791	0.000493448	-2.16839e-05	8.90218e-06
454.14	0.107175	0.0562469	-0.00277271	0.00049335	-2.22742e-05	9.2127e-06
454.99	0.106637	0.0554819	-0.00328458	0.000492995	-2.28795e-05	9.53229e-06
455.85	0.10601	0.0546478	-0.00381466	0.000492355	-2.35004e-05	9.86155e-06
456.7	0.105287	0.0537388	-0.00436408	0.000491406	-2.4138e-05	1.02011e-05
457.55	0.104472	0.052757	-0.00493247	0.000490158	-2.47919e-05	1.05506e-05
458.4	0.103567	0.0517051	-0.00551928	0.000488621	-2.54618e-05	1.091e-05
459.25	0.102573	0.0505832	-0.00612449	0.000486798	-2.61475e-05	1.12791e-05
460.1	0.101494	0.0493941	-0.00674757	0.000484701	-2.68488e-05	1.16578e-05
460.95	0.100323	0.0481334	-0.00738942	0.00048231	-2.75664e-05	1.20464e-05
461.79	0.0990514	0.0467933	-0.00805159	0.000479591	-2.83013e-05	1.24458e-05
462.64	0.0976785	0.0453744	-0.00873399	0.000476545	-2.90536e-05	1.28559e-05
463.48	0.0962033	0.0438755	-0.00943685	0.000473168	-2.98234e-05	1.32768e-05
464.32	0.0946271	0.0422977	-0.0101601	0.000469465	-3.06107e-05	1.37085e-05
465.17	0.0929567	0.040646	-0.0109028	0.000465459	-3.14149e-05	1.41506e-05
466	0.0911919	0.03892	-0.0116652	0.000461149	-3.22361e-05	1.46031e-05
466.83	0.0893332	0.0371204	-0.0124472	0.000456537	-3.30743e-05	1.5066e-05
467.65	0.087384	0.0352494	-0.0132485	0.000451635	-3.39292e-05	1.55392e-05
468.47	0.0853456	0.0333081	-0.0140689	0.000446448	-3.48007e-05	1.60224e-05
469.29	0.0832224	0.0312997	-0.0149079	0.000440989	-3.56885e-05	1.65156e-05
470.12	0.0810202	0.0292286	-0.0157646	0.00043528	-3.65919e-05	1.70182e-05
470.95	0.0787343	0.0270911	-0.01664	0.000429304	-3.75116e-05	1.75307e-05
471.8	0.0763574	0.0248818	-0.017535	0.000423037	-3.84485e-05	1.80536e-05
472.66	0.0738883	0.0225999	-0.0184499	0.000416475	-3.94026e-05	1.8587e-05
473.52	0.0713223	0.0202417	-0.0193854	0.000409602	-4.03745e-05	1.91313e-05
474.39	0.0686628	0.0178098	-0.020341	0.00040243	-4.13641e-05	1.96864e-05
475.25	0.065918	0.0153103	-0.0213159	0.000394986	-4.23704e-05	2.02516e-05
476.09	0.0630852	0.0127412	-0.0223103	0.000387262	-4.33939e-05	2.08272e-05
476.92	0.0601638	0.0101019	-0.0233246	0.000379256	-4.44348e-05	2.14133e-05
477.75	0.0571537	0.00739241	-0.0243588	0.000370968	-4.54931e-05	2.201e-05
478.56	0.0540513	0.00460997	-0.0254132	0.000362386	-4.6569e-05	2.26174e-05
479.37	0.0508576	0.00175533	-0.0264879	0.000353512	-4.76627e-05	2.32355e-05
480.17	0.047574	-0.00117057	-0.0275826	0.000344352	-4.87739e-05	2.38643e-05
480.98	0.0441975	-0.00416994	-0.0286979	0.000334895	-4.9903e-05	2.45039e-05
481.79	0.0407256	-0.00724469	-0.0298341	0.000325134	-5.10504e-05	2.51546e-05
482.6	0.0371565	-0.0103962	-0.0309916	0.000315062	-5.22163e-05	2.58166e-05
483.42	0.0334869	-0.0136269	-0.0321707	0.000304669	-5.3401e-05	2.64901e-05
484.25	0.0297205	-0.016934	-0.0333711	0.000293966	-5.46043e-05	2.71748e-05
485.09	0.025864	-0.0203128	-0.0345919	0.000282977	-5.58255e-05	2.78704e-05
485.94	0.0219183	-0.0237623	-0.0358332	0.000271705	-5.70647e-05	2.85768e-05
486.78	0.0178873	-0.02728	-0.0370946	0.000260164	-5.83216e-05	2.92938e-05
487.63	0.0137703	-0.0308661	-0.038376	0.00024835	-5.95962e-05	3.00215e-05
488.47	0.00956391	-0.0345234	-0.0396781	0.000236254	-6.08889e-05	3.07601e-05
489.32	0.00527148	-0.0382493	-0.0410003	0.000223885	-6.21995e-05	3.15094e-05
490.16	0.000895614	-0.042042	-0.0423425	0.000211254	-6.35278e-05	3.22693e-05
490.99	-0.00357113	-0.045907	-0.0437058	0.000198335	-6.48746e-05	3.30404e-05
491.81	-0.0081378	-0.0498511	-0.0450914	0.000185097	-6.62409e-05	3.38233e-05
492.63	-0.0128106	-0.0538788	-0.0465003	0.000171521	-6.76274e-05	3.46184e-05
493.44	-0.0175995	-0.0579977	-0.0479339	0.000157571	-6.90353e-05	3.54267e-05
494.25	-0.0225057	-0.0622087	-0.0493924	0.000143245	-7.04646e-05	3.6248e-05
495.06	-0.0275263	-0.0665095	-0.0508756	0.000128552	-7.19153e-05	3.70824e-05
495.87	-0.0326699	-0.0709068	-0.0523846	0.000113463	-7.33884e-05	3.79305e-05
496.69	-0.0379438	-0.0754058	-0.0539207	9.79544e-05	-7.48845e-05	3.87928e-05
497.52	-0.0433477	-0.0800064	-0.0554838	8.20268e-05	-7.64038e-05	3.96693e-05
498.33	-0.0488824	-0.0847094	-0.057074	6.5677e-05	-7.79464e-05	4.05601e-05
499.14	-0.0545488	-0.0895152	-0.0586916	4.89029e-05	-7.95124e-05	4.14653e-05
499.94	-0.0603447	-0.0944224	-0.0603362	3.17115e-05	-8.11017e-05	4.23848e-05
500.74	-0.0662786	-0.0994373	-0.0620092	1.40745e-05	-8.27152e-05	4.33193e-05
501.53	-0.0723622	-0.104569	-0.0637122	-4.04746e-06	-8.43542e-05	4.42695e-05
502.32	-0.0785979	-0.109818	-0.0654455	-2.26626e-05	-8.60191e-05	4.52357e-05
503.11	-0.0849909	-0.11519	-0.0672101	-4.17883e-05	-8.77103e-05	4.62182e-05
503.9	-0.0915379	-0.120681	-0.0690054	-6.14134e-05	-8.94278e-05	4.7217e-05
504.69	-0.098229	-0.126285	-0.0708303	-8.1504e-05	-9.11704e-05	4.82314e-05
505.47	-0.105064	-0.132001	-0.0726849	-0.00010206	-9.29384e-05	4.92613e-05
506.26	-0.112041	-0.137827	-0.0745687	-0.000123071	-9.47314e-05	5.03067e-05
507.05	-0.119157	-0.143763	-0.0764818	-0.000144533	-9.65495e-05	5.13674e-05
507.84	-0.126416	-0.14981	-0.0784245	-0.000166456	-9.83931e-05	5.24438e-05
508.63	-0.133812	-0.155964	-0.0803962	-0.000188818	-0.000100261	5.35354e-05
509.42	-0.141338	-0.162221	-0.082396	-0.0002116	-0.000102154	5.46418e-05
510.21	-0.149004	-0.168587	-0.0844252	-0.000234829	-0.000104072	5.57636e-05
511	-0.156821	-0.17507	-0.0864855	-0.000258546	-0.000106017	5.69019e-05
511.8	-0.164793	-0.181675	-0.0885777	-0.000282766	-0.000107988	5.80569e-05
512.61	-0.172932	-0.188409	-0.0907032	-0.000307525	-0.000109988	5.92294e-05
513.4	-0.181233	-0.195269	-0.0928616	-0.000332811	-0.000112016	6.04192e-05
514.19	-0.189687	-0.202249	-0.0950518	-0.000358591	-0.000114071	6.16256e-05
514.97	-0.198301	-0.209353	-0.0972747	-0.000384886	-0.000116154	6.28493e-05
515.75	-0.207078	-0.216583	-0.0995308	-0.000411708	-0.000118265	6.40904e-05
516.52	-0.215997	-0.223923	-0.101815	-0.000439026	-0.000120409	6.53419e-05
517.3	-0.225032	-0.231351	-0.104119	-0.000466809	-0.000122594	6.65941e-05
518.07	-0.234164	-0.238849	-0.106438	-0.000495026	-0.000124822	6.78407e-05
518.85	-0.243363	-0.246393	-0.108765	-0.000523626	-0.0001271	6.90725e-05
519.63	-0.252623	-0.253977	-0.111097	-0.00055261	-0.000129431	7.02857e-05
520.4	-0.261946	-0.261603	-0.113435	-0.000581996	-0.000131817	7.14795e-05
521.17	-0.271305	-0.269247	-0.11577	-0.000611744	-0.000134265	7.2644e-05
521.94	-0.280676	-0.276889	-0.118096	-0.000641829	-0.000136781	7.37702e-05
522.71	-0.290057	-0.284527	-0.120412	-0.000672243	-0.000139366	7.48576e-05
523.49	-0.299441	-0.292156	-0.122717	-0.000702968	-0.000142019	7.59056e-05
524.27	-0.308823	-0.299772	-0.125011	-0.000733998	-0.000144742	7.69116e-05
525.06	-0.318202	-0.307374	-0.127292	-0.000765332	-0.000147536	7.7876e-05
525.85	-0.327552	-0.314939	-0.129553	-0.000796932	-0.000150406	7.87892e-05
526.66	-0.336834	-0.322434	-0.131784	-0.000828745	-0.000153363	7.96373e-05
527.48	-0.346035	-0.329851	-0.133982	-0.000860752	-0.000156409	8.04166e-05
528.29	-0.355137	-0.337171	-0.136142	-0.00089292	-0.000159547	8.11208e-05
529.09	-0.364144	-0.344399	-0.138264	-0.000925268	-0.000162779	8.175e-05
529.89	-0.373079	-0.351553	-0.140353	-0.000957844	-0.000166102	8.23106e-05
530.68	-0.381938	-0.35863	-0.142409	-0.000990649	-0.000169518	8.27996e-05
531.47	-0.390725	-0.365632	-0.144431	-0.0010237	-0.000173029	8.32166e-05
532.25	-0.399437	-0.372557	-0.146418	-0.001057	-0.000176636	8.35604e-05
533.04	-0.40806	-0.379393	-0.148367	-0.00109052	-0.000180342	8.38266e-05
533.82	-0.416604	-0.386148	-0.150281	-0.00112428	-0.000184146	8.40175e-05
534.61	-0.425083	-0.392833	-0.152161	-0.00115833	-0.000188047	8.41362e-05
535.38	-0.433463	-0.399419	-0.154	-0.0011926	-0.000192053	8.41713e-05
536.15	-0.441703	-0.405872	-0.155785	-0.00122703	-0.000196173	8.41083e-05
536.91	-0.44978	-0.412173	-0.157511	-0.00126161	-0.000200412	8.39397e-05
537.67	-0.457656	-0.418289	-0.159168	-0.00129625	-0.00020478	8.36524e-05
538.44	-0.465332	-0.424221	-0.160756	-0.00133099	-0.000209277	8.32458e-05
539.22	-0.472831	-0.429988	-0.162279	-0.00136586	-0.000213901	8.27256e-05
540.01	-0.480125	-0.435565	-0.163729	-0.00140083	-0.000218658	8.20817e-05
540.81	-0.487193	-0.440935	-0.165102	-0.00143587	-0.000223555	8.13068e-05
541.6	-0.494046	-0.446108	-0.166401	-0.001471	-0.000228589	8.04046e-05
542.37	-0.500691	-0.451088	-0.167626	-0.00150621	-0.000233757	7.93781e-05
543.14	-0.507138	-0.455886	-0.168782	-0.00154153	-0.000239058	7.82307e-05
543.89	-0.51341	-0.46052	-0.169875	-0.00157699	-0.000244486	7.69705e-05
544.64	-0.519491	-0.464977	-0.1709	-0.00161257	-0.000250045	7.55919e-05
545.38	-0.525354	-0.469234	-0.17185	-0.00164823	-0.000255742	7.40856e-05
546.12	-0.531011	-0.4733	-0.172729	-0.00168398	-0.000261574	7.24555e-05
546.85	-0.536462	-0.477177	-0.173536	-0.00171981	-0.000267539	7.07029e-05
547.59	-0.541701	-0.48086	-0.17427	-0.00175574	-0.000273641	6.88246e-05
548.32	-0.546733	-0.484352	-0.174932	-0.00179177	-0.000279881	6.68206e-05
549.05	-0.551549	-0.487644	-0.175519	-0.0018279	-0.000286261	6.46871e-05
549.78	-0.556136	-0.490725	-0.176026	-0.00186411	-0.000292787	6.24186e-05
550.52	-0.560505	-0.493605	-0.176457	-0.00190043	-0.000299455	6.00193e-05
551.25	-0.564671	-0.496298	-0.176817	-0.00193687	-0.000306261	5.74953e-05
551.99	-0.568635	-0.498803	-0.177105	-0.00197342	-0.000313206	5.48459e-05
552.72	-0.572405	-0.501127	-0.177324	-0.00201012	-0.000320289	5.20732e-05
553.46	-0.575949	-0.503243	-0.177465	-0.00204691	-0.000327517	4.91664e-05
554.2	-0.579216	-0.505108	-0.177513	-0.00208373	-0.000334904	4.61072e-05
554.95	-0.582189	-0.506706	-0.177464	-0.00212055	-0.000342454	4.28887e-05
555.71	-0.584834	-0.50801	-0.177309	-0.00215732	-0.000350175	3.94995e-05
556.46	-0.587135	-0.509006	-0.177043	-0.00219404	-0.000358071	3.59335e-05
557.2	-0.589095	-0.509694	-0.176666	-0.0022307	-0.000366144	3.21905e-05
557.92	-0.590674	-0.510043	-0.176167	-0.00226726	-0.000374403	2.82564e-05
558.65	-0.591835	-0.51002	-0.175536	-0.00230366	-0.000382858	2.41174e-05
559.36	-0.592592	-0.509636	-0.174777	-0.00233994	-0.000391506	1.97783e-05
560.08	-0.592961	-0.508907	-0.173895	-0.0023761	-0.000400343	1.52458e-05
560.79	-0.592945	-0.507834	-0.17289	-0.00241215	-0.000409367	1.05201e-05
561.5	-0.592564	-0.506434	-0.171767	-0.00244813	-0.000418576	5.60819e-06
562.22	-0.591787	-0.50468	-0.170519	-0.00248398	-0.000427977	4.98976e-07
562.94	-0.590561	-0.502527	-0.16913	-0.00251964	-0.000437582	-4.82664e-06
563.67	-0.588889	-0.49998	-0.167602	-0.00255512	-0.000447392	-1.03673e-05
564.4	-0.586764	-0.497031	-0.165932	-0.00259041	-0.000457408	-1.61259e-05
565.14	-0.584196	-0.493687	-0.164123	-0.00262552	-0.000467631	-2.21003e-05
565.87	-0.581223	-0.489982	-0.162184	-0.00266053	-0.000478053	-2.8279e-05
566.61	-0.577845	-0.485913	-0.160115	-0.00269544	-0.000488675	-3.46631e-05
567.36	-0.57407	-0.481489	-0.157916	-0.00273028	-0.0004995	-4.12519e-05
568.11	-0.569915	-0.476722	-0.155594	-0.00276508	-0.000510523	-4.80399e-05
568.88	-0.565387	-0.471618	-0.153148	-0.00279985	-0.000521743	-5.50248e-05
569.65	-0.560513	-0.4662	-0.150587	-0.00283464	-0.000533156	-6.2199e-05
570.43	-0.555325	-0.460494	-0.147918	-0.00286951	-0.000544757	-6.95529e-05
571.2	-0.549798	-0.45448	-0.145134	-0.00290441	-0.000556551	-7.70949e-05
571.96	-0.543896	-0.448127	-0.142225	-0.00293932	-0.000568549	-8.48388e-05
572.72	-0.537614	-0.441428	-0.13919	-0.00297421	-0.000580752	-9.27868e-05
573.48	-0.530926	-0.434365	-0.136021	-0.00300906	-0.000593166	-0.000100948
574.23	-0.523854	-0.426952	-0.132725	-0.00304391	-0.000605789	-0.000109316
574.99	-0.516444	-0.419231	-0.129311	-0.00307883	-0.000618613	-0.000117877
575.75	-0.508684	-0.411188	-0.125778	-0.00311383	-0.000631641	-0.000126637
576.5	-0.500571	-0.402823	-0.122123	-0.0031489	-0.000644877	-0.000135596
577.26	-0.492106	-0.394136	-0.118346	-0.00318405	-0.000658319	-0.000144756
578.02	-0.483269	-0.385109	-0.114444	-0.00321924	-0.000671972	-0.000154123
578.78	-0.474065	-0.375747	-0.110416	-0.00325448	-0.000685835	-0.000163694
579.53	-0.464502	-0.366057	-0.106266	-0.00328978	-0.000699908	-0.000173469
580.28	-0.454564	-0.356025	-0.101988	-0.00332513	-0.000714194	-0.000183452
581.02	-0.44424	-0.345641	-0.0975795	-0.00336052	-0.000728697	-0.000193648
581.76	-0.433519	-0.334897	-0.0930377	-0.00339593	-0.00074342	-0.000204061
582.5	-0.422385	-0.323779	-0.0883579	-0.00343133	-0.000758367	-0.000214696
583.24	-0.41086	-0.312304	-0.0835457	-0.00346677	-0.000773534	-0.000225547
583.98	-0.398981	-0.300503	-0.0786102	-0.00350232	-0.000788915	-0.000236604
584.72	-0.386757	-0.288384	-0.0735533	-0.003538	-0.000804511	-0.000247865
585.46	-0.374209	-0.275965	-0.0683801	-0.00357385	-0.000820319	-0.000259324
586.2	-0.361338	-0.263243	-0.0630901	-0.00360988	-0.00083634	-0.000270981
586.93	-0.348121	-0.250202	-0.0576783	-0.00364604	-0.000852577	-0.000282844
587.65	-0.334579	-0.236859	-0.0521494	-0.00368239	-0.000869028	-0.000294906
588.36	-0.320728	-0.223226	-0.0465073	-0.00371894	-0.000885691	-0.000307164
589.07	-0.306529	-0.209271	-0.0407413	-0.00375566	-0.000902575	-0.000319631
589.77	-0.291934	-0.194953	-0.0348387	-0.00379246	-0.000919691	-0.000332323
590.47	-0.276912	-0.180245	-0.0287906	-0.0038293	-0.000937048	-0.000345252
591.17	-0.261409	-0.165102	-0.0225827	-0.00386611	-0.000954658	-0.000358436
591.86	-0.24542	-0.14952	-0.0162135	-0.00390288	-0.000972521	-0.000371878
592.56	-0.228964	-0.133514	-0.00968709	-0.00393965	-0.000990638	-0.000385572
593.26	-0.211995	-0.117044	-0.00299112	-0.00397636	-0.00100902	-0.000399534
593.97	-0.194476	-0.10008	0.00388449	-0.00401295	-0.00102767	-0.000413778
594.66	-0.176409	-0.082624	0.0109394	-0.00404944	-0.0010466	-0.000428304
595.36	-0.15779	-0.0646707	0.0181749	-0.00408582	-0.0010658	-0.000443113
596.06	-0.138615	-0.046218	0.025592	-0.00412208	-0.00108527	-0.000458207
596.76	-0.118897	-0.0272757	0.0331877	-0.00415826	-0.00110502	-0.000473583
597.46	-0.0985915	-0.00780644	0.040974	-0.00419428	-0.00112506	-0.000489255
598.16	-0.077637	0.0122414	0.0489674	-0.00423006	-0.00114539	-0.000505246
598.87	-0.0560213	0.0328788	0.0571716	-0.00426559	-0.00116603	-0.000521559
599.58	-0.0337171	0.0541285	0.0655939	-0.00430083	-0.00118698	-0.000538204
600.28	-0.0107442	0.0759746	0.0742295	-0.00433581	-0.00120823	-0.000555177
600.97	0.0128416	0.0983703	0.0830641	-0.00437063	-0.00122978	-0.000572459
601.66	0.0370387	0.121315	0.0920978	-0.00440531	-0.00125163	-0.000590052
602.35	0.0618283	0.144793	0.101326	-0.00443987	-0.00127377	-0.00060795
603.03	0.0872028	0.168799	0.110748	-0.00447435	-0.00129621	-0.000626151
603.72	0.113178	0.193345	0.120366	-0.00450871	-0.00131894	-0.000644662
604.4	0.139718	0.218402	0.130173	-0.00454302	-0.00134198	-0.000663472
605.09	0.166788	0.243941	0.140159	-0.00457734	-0.00136529	-0.000682569
605.78	0.194433	0.270002	0.150338	-0.00461161	-0.00138891	-0.000701971
606.47	0.222716	0.296635	0.160724	-0.00464574	-0.00141284	-0.000721699
607.16	0.25166	0.323861	0.171326	-0.0046797	-0.00143709	-0.00074176
607.84	0.281321	0.351729	0.182158	-0.0047134	-0.00146166	-0.000762174
608.53	0.31168	0.38022	0.193215	-0.00474688	-0.00148657	-0.000782936
609.22	0.34268	0.409289	0.204484	-0.00478025	-0.0015118	-0.000804028
609.91	0.374356	0.438965	0.215973	-0.00481344	-0.00153735	-0.000825463
610.6	0.406724	0.469262	0.227687	-0.00484645	-0.00156324	-0.000847247
611.29	0.439705	0.500109	0.239601	-0.00487909	-0.00158935	-0.000869305
611.99	0.473207	0.531421	0.251683	-0.00491107	-0.00161552	-0.000891538
612.7	0.507152	0.56313	0.263908	-0.00494225	-0.00164168	-0.000913877
613.41	0.541423	0.59513	0.27624	-0.00497242	-0.00166766	-0.000936222
614.13	0.576003	0.627406	0.28867	-0.00500142	-0.00169341	-0.000958538
614.86	0.610911	0.659971	0.301204	-0.00502917	-0.00171892	-0.000980823
615.58	0.646045	0.692734	0.313808	-0.00505541	-0.00174404	-0.00100297
616.31	0.681322	0.725619	0.326452	-0.00507985	-0.00176862	-0.0010249
617.02	0.716728	0.758612	0.339134	-0.0051025	-0.00179266	-0.00104659
617.74	0.75223	0.79169	0.351846	-0.00512341	-0.00181615	-0.00106804
618.45	0.787805	0.824829	0.364578	-0.0051425	-0.00183904	-0.00108922
619.16	0.823455	0.858031	0.377334	-0.00515981	-0.00186135	-0.00111013
619.86	0.859072	0.8912	0.390076	-0.00517506	-0.00188293	-0.00113068
620.57	0.894519	0.924211	0.40276	-0.00518787	-0.00190355	-0.00115071
621.27	0.929745	0.957018	0.41537	-0.00519816	-0.00192316	-0.0011702
621.95	0.964671	0.989553	0.42788	-0.00520578	-0.00194167	-0.00118906
622.62	0.999325	1.02184	0.440298	-0.00521069	-0.00195907	-0.00120731
623.29	1.03381	1.05396	0.452655	-0.00521299	-0.00197547	-0.00122501
623.95	1.0681	1.0859	0.464946	-0.00521257	-0.00199082	-0.00124216
624.6	1.10223	1.11769	0.477175	-0.00520935	-0.00200511	-0.00125874
625.26	1.13619	1.14932	0.489341	-0.00520331	-0.00201833	-0.00127474
625.91	1.16992	1.18073	0.501424	-0.00519433	-0.0020304	-0.00129012
626.57	1.20346	1.21196	0.513441	-0.00518245	-0.00204137	-0.00130491
627.24	1.23688	1.24307	0.525407	-0.0051677	-0.00205128	-0.00131914
627.91	1.27004	1.27394	0.537281	-0.00514979	-0.00205996	-0.0013327
628.59	1.3028	1.30443	0.549011	-0.00512831	-0.00206717	-0.00134543
629.28	1.33506	1.33446	0.560571	-0.00510308	-0.00207281	-0.00135725
629.98	1.36667	1.3639	0.571911	-0.00507377	-0.00207666	-0.00136802
630.67	1.39766	1.39276	0.583036	-0.00504032	-0.00207873	-0.00137774
631.35	1.4281	1.42112	0.593973	-0.0050028	-0.00207909	-0.00138648
632.01	1.45791	1.44889	0.604688	-0.00496096	-0.00207759	-0.00139413
632.67	1.487	1.476	0.615157	-0.00491457	-0.00207412	-0.00140062
633.32	1.51542	1.50249	0.625394	-0.00486374	-0.00206874	-0.00140599
633.97	1.54317	1.52837	0.635404	-0.00480861	-0.00206149	-0.00141026
634.61	1.5703	1.55368	0.6452	-0.00474926	-0.00205243	-0.00141347
635.26	1.5969	1.57849	0.654813	-0.00468591	-0.00204168	-0.00141572
635.9	1.62289	1.60276	0.664222	-0.00461843	-0.00202916	-0.00141693
636.55	1.64819	1.62638	0.673394	-0.00454657	-0.00201472	-0.00141701
637.21	1.67283	1.6494	0.682341	-0.00447045	-0.00199842	-0.001416
637.87	1.6968	1.6718	0.691065	-0.00439015	-0.00198029	-0.00141392
638.53	1.72009	1.69359	0.69956	-0.00430554	-0.00196028	-0.00141073
639.19	1.74272	1.71477	0.707831	-0.00421658	-0.00193838	-0.00140644
639.85	1.76467	1.73532	0.715868	-0.00412314	-0.00191453	-0.00140101
640.5	1.78588	1.7552	0.723655	-0.00402504	-0.00188866	-0.00139438
641.15	1.8064	1.77444	0.731208	-0.00392241	-0.00186082	-0.00138661
641.81	1.82628	1.7931	0.738543	-0.00381546	-0.00183111	-0.00137775
642.46	1.84552	1.81116	0.745662	-0.00370416	-0.00179953	-0.0013678
643.12	1.86415	1.82867	0.752573	-0.00358855	-0.00176611	-0.00135678
643.77	1.88205	1.84551	0.759241	-0.00346833	-0.00173067	-0.00134458
644.44	1.89905	1.86153	0.765602	-0.00334298	-0.00169293	-0.001331
645.1	1.91506	1.87665	0.771632	-0.00321232	-0.00165279	-0.00131599
645.77	1.92997	1.89075	0.777292	-0.00307604	-0.00161006	-0.00129941
646.45	1.94372	1.9038	0.782562	-0.00293395	-0.00156466	-0.00128121
647.14	1.95632	1.9158	0.787446	-0.00278602	-0.00151658	-0.00126138
647.81	1.96763	1.92663	0.791895	-0.00263186	-0.0014656	-0.00123978
648.48	1.97751	1.93614	0.795864	-0.00247106	-0.00141151	-0.00121628
649.15	1.98601	1.9444	0.799369	-0.00230378	-0.00135437	-0.0011909
649.81	1.99318	1.95146	0.802431	-0.00213022	-0.0012943	-0.00116374
650.46	1.99904	1.95731	0.805054	-0.00195039	-0.0012313	-0.00113479
651.11	2.00366	1.96203	0.807261	-0.00176449	-0.00116549	-0.00110412
651.76	2.00692	1.96552	0.809015	-0.00157221	-0.00109667	-0.00107162
652.4	2.00863	1.9676	0.81025	-0.00137301	-0.00102457	-0.00103708
653.04	2.00881	1.96827	0.810972	-0.00116692	-0.000949197	-0.00100054
653.69	2.00741	1.96752	0.811171	-0.000953895	-0.00087051	-0.000961944
654.33	2.00449	1.96538	0.810859	-0.000733929	-0.000788544	-0.000921334
654.97	2.00019	1.96198	0.810085	-0.000507284	-0.000703477	-0.000878833
655.62	1.99452	1.95734	0.808851	-0.000273889	-0.000615293	-0.000834436
656.26	1.98753	1.95148	0.807168	-3.37043e-05	-0.000524005	-0.000788157
656.91	1.97927	1.94446	0.805056	0.000213135	-0.000429698	-0.000740056
657.57	1.96978	1.93631	0.802524	0.000466559	-0.000332409	-0.000690157
658.22	1.95915	1.92712	0.799607	0.000726417	-0.000232255	-0.000638548
658.88	1.94753	1.91701	0.796345	0.000992488	-0.000129391	-0.000585335
659.53	1.9348	1.90589	0.792709	0.00126502	-2.36814e-05	-0.000530431
660.19	1.92085	1.89364	0.788653	0.00154438	8.50847e-05	-0.000473693
660.84	1.90566	1.88025	0.78417	0.00183066	0.000196944	-0.0004151
661.49	1.88912	1.86563	0.779232	0.00212409	0.00031203	-0.00035456
662.14	1.87133	1.84985	0.773864	0.00242456	0.000430257	-0.000292138
662.79	1.85247	1.83309	0.768126	0.00273178	0.000551403	-0.000227991
663.44	1.83249	1.8153	0.762002	0.0030459	0.00067555	-0.000162068
664.09	1.81141	1.79648	0.755491	0.003367	0.000802725	-9.43535e-05
664.74	1.78921	1.77663	0.748594	0.00369509	0.000932927	-2.48485e-05
665.4	1.76581	1.75568	0.741284	0.00403029	0.00106626	4.65177e-05
666.06	1.74123	1.73364	0.733569	0.00437258	0.00120269	0.000119726
666.72	1.71551	1.71055	0.725458	0.0047219	0.00134219	0.000194752
667.37	1.68859	1.68634	0.716932	0.00507839	0.00148484	0.000271654
668.02	1.66042	1.66099	0.707979	0.00544222	0.00163072	0.000350478
668.67	1.63096	1.63446	0.698585	0.00581347	0.00177989	0.000431263
669.31	1.60016	1.60668	0.688728	0.00619227	0.00193242	0.000514068
669.95	1.56809	1.57774	0.678437	0.00657851	0.00208823	0.000598823
670.6	1.53491	1.54778	0.667761	0.00697197	0.00224714	0.000685405
671.25	1.50066	1.51682	0.656711	0.00737264	0.00240914	0.000773792
671.9	1.46544	1.48495	0.645315	0.00778043	0.00257412	0.000863914
672.55	1.42922	1.45216	0.633571	0.00819536	0.0027421	0.000955782
673.2	1.39194	1.41839	0.621454	0.00861757	0.00291317	0.00104946
673.85	1.35368	1.38369	0.60899	0.00904695	0.00308726	0.00114489
674.49	1.31449	1.34814	0.596199	0.00948342	0.0032643	0.00124202
675.14	1.27424	1.31159	0.583032	0.00992735	0.00344449	0.001341
675.79	1.23274	1.27389	0.569432	0.0103792	0.00362809	0.00144198
676.43	1.18987	1.23493	0.555359	0.0108392	0.00381528	0.00154511
677.08	1.14543	1.19452	0.540745	0.0113079	0.00400634	0.00165056
677.74	1.09941	1.15265	0.525587	0.0117854	0.00420131	0.00175836
678.4	1.05187	1.10939	0.509907	0.0122715	0.00440012	0.00186846
679.06	1.00266	1.06459	0.493649	0.0127667	0.00460301	0.00198102
679.71	0.951623	1.01811	0.476769	0.0132715	0.00481018	0.00209617
680.36	0.898781	0.969966	0.459268	0.0137857	0.00502164	0.00221392
681.01	0.844109	0.920143	0.441141	0.0143094	0.00523741	0.00233429
681.64	0.7876	0.868632	0.422385	0.0148427	0.00545752	0.00245728
682.27	0.729301	0.815474	0.403015	0.0153855	0.00568191	0.00258286
682.9	0.669046	0.76052	0.382976	0.0159382	0.00591082	0.00271119
683.52	0.606603	0.703562	0.362194	0.0165014	0.00614458	0.0028425
684.14	0.541926	0.644556	0.340652	0.0170752	0.00638326	0.00297683
684.75	0.474912	0.583411	0.318316	0.0176599	0.00662702	0.00311427
685.37	0.405642	0.520198	0.295214	0.0182553	0.00687576	0.00325478
685.98	0.334335	0.455115	0.271414	0.0188611	0.00712923	0.00339816
686.59	0.261003	0.388168	0.246919	0.0194773	0.00738742	0.00354441
687.2	0.185723	0.319429	0.221755	0.0201039	0.00765026	0.00369348
687.82	0.108527	0.248925	0.19593	0.0207408	0.00791772	0.00384533
688.43	0.0293567	0.176604	0.169427	0.0213881	0.00818989	0.00400004
689.05	-0.0516488	0.102589	0.142288	0.0220456	0.00846661	0.00415747
689.66	-0.134346	0.0270095	0.114561	0.0227132	0.0087477	0.00431752
690.29	-0.218913	-0.0502953	0.0861872	0.0233912	0.00903342	0.00448036
690.91	-0.305578	-0.129531	0.0570915	0.0240801	0.00932409	0.0046462
691.54	-0.394436	-0.210785	0.0272427	0.0247803	0.00961986	0.00481513
692.17	-0.485697	-0.294245	-0.00342756	0.0254922	0.00992102	0.00498737
692.8	-0.579281	-0.379839	-0.0348939	0.0262156	0.0102275	0.00516284
693.42	-0.674966	-0.46737	-0.0670851	0.0269504	0.010539	0.00534135
694.04	-0.772881	-0.556954	-0.100044	0.0276966	0.0108557	0.00552304
694.66	-0.873089	-0.648647	-0.133791	0.0284546	0.0111777	0.00570797
695.28	-0.975315	-0.742209	-0.168242	0.0292224	0.0115043	0.00589575
695.89	-1.07926	-0.837383	-0.203307	0.0299974	0.0118342	0.00608592
696.5	-1.18467	-0.933935	-0.238903	0.0307777	0.0121667	0.00627812
697.1	-1.29112	-1.0315	-0.274905	0.0315608	0.0125008	0.0064718
697.71	-1.39858	-1.13006	-0.3113	0.0323458	0.012836	0.00666684
698.32	-1.50712	-1.22966	-0.348115	0.0331327	0.0131723	0.0068633
698.94	-1.61641	-1.33003	-0.385247	0.0339186	0.0135087	0.00706068
699.56	-1.72616	-1.43092	-0.422614	0.0347013	0.0138441	0.00725854
700.18	-1.83634	-1.53227	-0.460197	0.0354806	0.0141784	0.00745683
700.8	-1.9468	-1.63399	-0.497958	0.0362562	0.0145116	0.00765545
701.42	-2.05748	-1.736	-0.535872	0.0370274	0.0148432	0.00785428
702.04	-2.16836	-1.8383	-0.573938	0.0377945	0.0151734	0.00805334
702.66	-2.27909	-1.94057	-0.612049	0.0385547	0.015501	0.00825211
703.27	-2.38921	-2.04242	-0.650062	0.0393043	0.0158245	0.00844989
703.89	-2.49856	-2.14369	-0.687924	0.0400422	0.0161433	0.00864646
704.5	-2.60684	-2.24415	-0.725552	0.0407666	0.0164567	0.00884146
705.11	-2.71417	-2.34387	-0.762977	0.0414778	0.0167649	0.00903497
705.72	-2.8209	-2.44318	-0.800311	0.0421778	0.0170686	0.00922746
706.33	-2.92697	-2.54204	-0.837543	0.0428658	0.0173677	0.00941882
706.95	-3.0325	-2.64053	-0.874706	0.0435419	0.0176622	0.00960914
707.57	-3.13745	-2.73864	-0.911791	0.0442058	0.0179521	0.00979837
708.19	-3.24159	-2.83616	-0.94873	0.0448564	0.0182367	0.00998623
708.82	-3.34513	-2.93328	-0.985584	0.0454943	0.0185164	0.0101729
709.45	-3.44823	-3.03014	-1.02241	0.0461207	0.0187917	0.0103588
710.07	-3.55048	-3.12638	-1.05908	0.0467324	0.0190613	0.010543
710.7	-3.65136	-3.22155	-1.09543	0.0473254	0.0193235	0.010725
711.34	-3.75057	-3.31538	-1.13138	0.0478975	0.0195773	0.0109043
711.97	-3.84762	-3.40744	-1.16676	0.0484452	0.0198212	0.0110802
712.6	-3.94256	-3.49777	-1.20161	0.0489684	0.0200552	0.0112528
713.23	-4.0357	-3.58667	-1.23601	0.049469	0.0202802	0.0114224
713.86	-4.1267	-3.67383	-1.26987	0.0499441	0.020495	0.0115885
714.49	-4.21533	-3.75904	-1.3031	0.0503919	0.0206987	0.0117508
715.11	-4.30171	-3.84241	-1.33576	0.0508133	0.0208918	0.0119094
715.74	-4.38585	-3.92396	-1.36785	0.0512092	0.0210746	0.0120645
716.36	-4.46791	-4.00381	-1.3994	0.0515806	0.0212475	0.0122163
716.99	-4.54815	-4.08221	-1.43051	0.0519298	0.0214114	0.0123652
717.61	-4.62637	-4.15897	-1.46111	0.0522552	0.0215658	0.0125109
718.23	-4.70223	-4.2338	-1.4911	0.0525543	0.0217095	0.012653
718.85	-4.77583	-4.30679	-1.52051	0.0528283	0.021843	0.0127915
719.47	-4.84716	-4.37793	-1.54934	0.0530773	0.0219664	0.0129265
720.09	-4.91618	-4.44718	-1.57758	0.0533008	0.0220793	0.013058
720.71	-4.98297	-4.51461	-1.60524	0.0534987	0.022182	0.013186
721.33	-5.04742	-4.58014	-1.63231	0.0536703	0.0222739	0.0133104
721.95	-5.10941	-4.64366	-1.65875	0.053814	0.0223546	0.0134308
722.57	-5.16905	-4.70527	-1.68458	0.0539311	0.0224244	0.0135476
723.18	-5.2265	-4.76509	-1.70986	0.0540232	0.0224842	0.013661
723.8	-5.28177	-4.82316	-1.7346	0.0540903	0.0225338	0.013771
724.42	-5.33495	-4.87954	-1.75882	0.054133	0.0225735	0.0138778
725.05	-5.38568	-4.93392	-1.7824	0.0541484	0.0226021	0.0139807
725.66	-5.43332	-4.98575	-1.80517	0.0541314	0.0226175	0.0140789
726.27	-5.47765	-5.03483	-1.82705	0.0540802	0.0226189	0.0141721
726.88	-5.51824	-5.08077	-1.8479	0.0539917	0.022605	0.0142595
727.48	-5.55491	-5.12344	-1.86768	0.0538642	0.0225751	0.014341
728.07	-5.5877	-5.16286	-1.88639	0.0536979	0.0225292	0.0144165
728.66	-5.61614	-5.19863	-1.9039	0.0534888	0.0224657	0.0144854
729.25	-5.63977	-5.23034	-1.92006	0.0532334	0.0223832	0.0145469
729.84	-5.65875	-5.25813	-1.93493	0.0529328	0.022282	0.0146014
730.43	-5.67327	-5.28217	-1.94856	0.052589	0.022163	0.0146491
731.02	-5.68334	-5.30247	-1.96095	0.0522022	0.0220263	0.0146901
731.61	-5.6892	-5.31923	-1.97219	0.0517742	0.0218726	0.0147247
732.21	-5.69046	-5.33214	-1.98215	0.0513021	0.0217007	0.0147524
732.81	-5.68649	-5.34062	-1.99063	0.0507807	0.0215084	0.0147722
733.41	-5.67732	-5.3447	-1.99766	0.0502103	0.0212959	0.0147842
734.01	-5.66284	-5.3443	-2.00319	0.0495903	0.0210628	0.0147882
734.61	-5.64321	-5.33954	-2.00728	0.0489213	0.0208095	0.0147844
735.21	-5.61895	-5.3309	-2.01009	0.0482068	0.0205374	0.0147736
735.81	-5.59008	-5.31839	-2.01163	0.0474466	0.0202466	0.0147557
736.41	-5.55675	-5.30216	-2.01194	0.0466411	0.0199372	0.0147308
737.02	-5.51919	-5.28238	-2.01111	0.0457919	0.0196099	0.0146994
737.61	-5.47746	-5.25913	-2.00914	0.0448997	0.0192651	0.0146615
738.2	-5.43193	-5.23274	-2.00616	0.0439668	0.0189037	0.0146177
738.79	-5.38305	-5.2036	-2.0023	0.042996	0.0185269	0.0145684
739.37	-5.33051	-5.17143	-1.99748	0.0419851	0.0181339	0.0145134
739.95	-5.27386	-5.13585	-1.99155	0.0409303	0.017723	0.0144518
740.53	-5.21304	-5.0968	-1.98449	0.0398311	0.017294	0.0143836
741.11	-5.14773	-5.05401	-1.97622	0.0386852	0.0168459	0.0143084
741.69	-5.07824	-5.00775	-1.96682	0.0374942	0.0163795	0.0142266
742.27	-5.00519	-4.95857	-1.9565	0.0362622	0.0158965	0.0141389
742.86	-4.92846	-4.90635	-1.94521	0.0349881	0.0153965	0.0140452
743.45	-4.84803	-4.8511	-1.93295	0.0336713	0.0148794	0.0139455
744.04	-4.76391	-4.79282	-1.91973	0.0323119	0.014345	0.0138397
744.63	-4.67579	-4.73123	-1.90545	0.0309082	0.0137927	0.0137275
745.21	-4.58377	-4.66643	-1.89014	0.0294607	0.0132226	0.013609
745.79	-4.48791	-4.59847	-1.87382	0.02797	0.0126351	0.0134843
746.37	-4.38803	-4.52719	-1.85644	0.0264347	0.0120294	0.0133532
746.95	-4.28402	-4.45249	-1.83796	0.0248535	0.0114052	0.0132154
747.53	-4.17571	-4.37424	-1.81834	0.0232255	0.0107619	0.0130707
748.11	-4.06287	-4.29223	-1.7975	0.0215492	0.010099	0.0129189
748.69	-3.94583	-4.20674	-1.77555	0.0198264	0.00941722	0.0127603
749.28	-3.82511	-4.11825	-1.75264	0.0180604	0.00871802	0.0125957
749.86	-3.70083	-4.02686	-1.72883	0.0162518	0.0080017	0.0124251
750.45	-3.57334	-3.93287	-1.70422	0.0144024	0.00726907	0.0122491
751.04	-3.44258	-3.83624	-1.67879	0.012512	0.00652005	0.0120676
751.64	-3.30829	-3.73674	-1.65246	0.0105789	0.00575386	0.0118802
752.24	-3.17075	-3.63462	-1.62532	0.00860477	0.00497126	0.0116872
752.84	-3.03016	-3.53005	-1.59744	0.00659094	0.00417283	0.0114891
753.44	-2.88604	-3.42262	-1.56867	0.00453368	0.003357	0.011285
754.06	-2.7378	-3.31181	-1.53882	0.00242847	0.00252183	0.0110742
754.67	-2.58502	-3.19725	-1.50777	0.000272237	0.00166601	0.0108559
755.28	-2.42699	-3.07833	-1.4753	-0.0019401	0.000787359	0.0106293
755.88	-2.26371	-2.95503	-1.44142	-0.00420903	-0.000114294	0.0103942
756.48	-2.09542	-2.82757	-1.40619	-0.00653311	-0.00103831	0.010151
757.07	-1.92153	-2.69545	-1.36944	-0.00891673	-0.00198656	0.00989886
757.66	-1.7416	-2.55828	-1.33104	-0.0113634	-0.00296053	0.0096371
758.25	-1.55566	-2.41607	-1.29098	-0.013873	-0.00396017	0.00936576
758.84	-1.36363	-2.26876	-1.24926	-0.016446	-0.00498567	0.00908475
759.43	-1.16549	-2.11634	-1.20586	-0.0190828	-0.00603717	0.00879402
760.02	-0.961388	-1.95894	-1.16084	-0.0217822	-0.00711423	0.0084938
760.61	-0.750771	-1.79608	-1.11402	-0.0245485	-0.00821862	0.00818327
761.2	-0.532864	-1.62707	-1.06517	-0.0273875	-0.00935284	0.00786131
761.78	-0.307503	-1.45178	-1.01423	-0.0303005	-0.0105174	0.0075277
762.35	-0.0743406	-1.26989	-0.961106	-0.03329	-0.0117134	0.00718193
762.92	0.166344	-1.08167	-0.905878	-0.0363545	-0.0129402	0.00682438
763.48	0.413798	-0.887761	-0.848784	-0.0394888	-0.0141955	0.00645607
764.05	0.667985	-0.688213	-0.789837	-0.042693	-0.0154793	0.00607705
764.61	0.928631	-0.483265	-0.729125	-0.0459655	-0.0167909	0.00568765
765.17	1.19563	-0.273013	-0.666681	-0.0493057	-0.0181301	0.00528803
765.72	1.46917	-0.0572854	-0.602447	-0.0527152	-0.0194975	0.0048779
766.28	1.74879	0.163499	-0.53657	-0.0561908	-0.0208917	0.00445791
766.85	2.034	0.388906	-0.469206	-0.0597293	-0.0223113	0.00402873
767.41	2.32539	0.619461	-0.400169	-0.0633352	-0.0237583	0.0035895
767.98	2.62373	0.855839	-0.329224	-0.0670142	-0.0252351	0.0031391
768.55	2.92935	1.09832	-0.256272	-0.0707688	-0.0267427	0.00267708
769.13	3.24296	1.34753	-0.181095	-0.0746043	-0.0282834	0.00220242
769.7	3.56427	1.60322	-0.103783	-0.0785188	-0.0298565	0.00171549
770.27	3.89253	1.86471	-0.0245697	-0.0825074	-0.0314596	0.00121733
770.85	4.22818	2.1324	0.0566758	-0.0865734	-0.0330943	0.000707311
771.42	4.57143	2.40647	0.140017	-0.0907187	-0.0347613	0.000185111
772	4.92168	2.68635	0.225275	-0.094933	-0.0364564	-0.00034837
772.57	5.27845	2.97159	0.312301	-0.0992046	-0.0381749	-0.000892325
773.14	5.64113	3.26162	0.400911	-0.103524	-0.0399128	-0.00144585
773.7	6.00878	3.55558	0.490819	-0.107877	-0.0416642	-0.00200752
774.26	6.38146	3.8535	0.582044	-0.112261	-0.0434282	-0.00257741
774.81	6.7595	4.15567	0.674686	-0.116678	-0.0452051	-0.00315596
775.36	7.14224	4.46146	0.768547	-0.121113	-0.0469898	-0.00374216
775.91	7.52924	4.77044	0.863493	-0.125557	-0.0487778	-0.00433527
776.48	7.92031	5.08245	0.959465	-0.130008	-0.0505685	-0.00493505
777.06	8.31504	5.39712	1.05633	-0.134462	-0.0523605	-0.00554095
777.63	8.71328	5.7143	1.15405	-0.138918	-0.0541528	-0.00615275
778.19	9.11501	6.03398	1.25261	-0.143375	-0.0559453	-0.00677044
778.75	9.5195	6.35547	1.35179	-0.14782	-0.0577327	-0.00739289
779.31	9.92588	6.67796	1.45133	-0.152235	-0.0595076	-0.00801874
779.86	10.3338	7.00106	1.5511	-0.156615	-0.0612676	-0.00864739
780.42	10.7425	7.32421	1.65091	-0.160949	-0.0630089	-0.00927791
780.98	11.1524	7.64771	1.75088	-0.165241	-0.0647324	-0.00991082
781.54	11.5645	7.97237	1.85127	-0.169502	-0.066443	-0.0105475
782.1	11.9787	8.29818	1.95208	-0.17373	-0.0681397	-0.0111878
782.67	12.3954	8.62549	2.05344	-0.177926	-0.0698234	-0.0118325
783.25	12.8146	8.95422	2.15532	-0.18209	-0.0714936	-0.0124814
783.83	13.2357	9.28391	2.25756	-0.186214	-0.0731474	-0.0131337
784.42	13.6592	9.61502	2.36034	-0.190305	-0.0747871	-0.0137903
785.01	14.0858	9.948	2.46379	-0.194367	-0.0764152	-0.0144519
785.6	14.5143	10.282	2.56764	-0.198386	-0.0780253	-0.0151171
786.17	14.944	10.6161	2.67158	-0.202341	-0.0796092	-0.0157843
786.75	15.374	10.9497	2.77544	-0.206223	-0.0811628	-0.0164526
787.31	15.8035	11.2818	2.87887	-0.210013	-0.0826784	-0.0171204
787.88	16.2325	11.6126	2.98197	-0.213711	-0.0841565	-0.017788
788.44	16.662	11.9429	3.08497	-0.217329	-0.0856014	-0.0184566
789	17.0912	12.272	3.18766	-0.220853	-0.0870077	-0.0191252
789.56	17.5197	12.5994	3.28993	-0.224274	-0.0883717	-0.0197932
790.12	17.9478	12.9256	3.39184	-0.227598	-0.0896955	-0.0204609
790.68	18.3753	13.2502	3.49336	-0.230825	-0.0909798	-0.0211282
791.24	18.8026	13.5737	3.59457	-0.233963	-0.0922269	-0.0217957
791.8	19.2303	13.8966	3.69564	-0.237021	-0.0934413	-0.0224642
792.36	19.6577	14.2184	3.79642	-0.239992	-0.0946198	-0.023133
792.93	20.0844	14.5384	3.89673	-0.242864	-0.0957572	-0.0238012
793.49	20.5105	14.8569	3.99659	-0.245641	-0.0968554	-0.024469
794.07	20.9357	15.1738	4.09598	-0.248324	-0.0979148	-0.0251362
794.65	21.3603	15.489	4.19489	-0.25091	-0.0989342	-0.0258029
795.23	21.7843	15.8028	4.29342	-0.253401	-0.0999145	-0.0264696
795.82	22.2078	16.115	4.39151	-0.255794	-0.100854	-0.0271359
796.42	22.6305	16.4255	4.48913	-0.258082	-0.10175	-0.0278017
797.02	23.0527	16.7345	4.58633	-0.260271	-0.102606	-0.0284672
797.6	23.4744	17.0421	4.68315	-0.262367	-0.103423	-0.0291329
798.18	23.8959	17.3485	4.77964	-0.264371	-0.104202	-0.0297988
798.76	24.3173	17.6538	4.87585	-0.266287	-0.104944	-0.0304654
799.33	24.738	17.9574	4.97156	-0.268099	-0.105644	-0.0311315
799.89	25.1567	18.2581	5.06642	-0.269785	-0.106291	-0.0317953
800.45	25.5729	18.5555	5.16028	-0.271335	-0.106882	-0.032456
801.01	25.9858	18.8488	5.25288	-0.272734	-0.107411	-0.0331122
801.57	26.3952	19.1376	5.34414	-0.273973	-0.107874	-0.0337637
802.12	26.8011	19.4222	5.43411	-0.275056	-0.108273	-0.0344105
802.67	27.2027	19.7017	5.52249	-0.275962	-0.108599	-0.0350513
803.22	27.5992	19.9753	5.60906	-0.276674	-0.108845	-0.0356848
803.77	27.9907	20.2432	5.69388	-0.2772	-0.109015	-0.0363113
804.32	28.3776	20.5058	5.77704	-0.277546	-0.10911	-0.0369316
804.87	28.76	20.763	5.85855	-0.277714	-0.109132	-0.0375455
805.43	29.1383	21.0153	5.93855	-0.277713	-0.109084	-0.038154
805.98	29.5117	21.2619	6.01681	-0.277529	-0.108961	-0.0387558
806.54	29.8791	21.5019	6.09297	-0.277137	-0.108752	-0.039349
807.11	30.2405	21.7351	6.16704	-0.276538	-0.108457	-0.0399337
807.67	30.5956	21.9614	6.23894	-0.275729	-0.108076	-0.0405097
808.25	30.945	22.1812	6.30882	-0.274714	-0.107611	-0.0410775
808.83	31.2898	22.3955	6.37703	-0.273512	-0.107068	-0.041639
809.41	31.6302	22.6046	6.44363	-0.272124	-0.106448	-0.0421946
810.01	31.9667	22.8087	6.50876	-0.270552	-0.105753	-0.0427447
810.6	32.2997	23.0085	6.57257	-0.268805	-0.104986	-0.0432903
811.19	32.6294	23.204	6.6351	-0.266886	-0.104148	-0.0438315
811.77	32.9567	23.3959	6.69661	-0.264809	-0.103245	-0.0443698
812.34	33.2825	23.5854	6.75741	-0.262588	-0.102282	-0.0449066
812.91	33.6065	23.7717	6.81733	-0.260211	-0.101256	-0.0454412
813.47	33.9276	23.9541	6.87611	-0.257663	-0.100159	-0.0459721
814.03	34.2457	24.1325	6.93371	-0.254939	-0.0989896	-0.0464992
814.59	34.5604	24.3063	6.98996	-0.252029	-0.0977436	-0.0470216
815.14	34.8722	24.4762	7.04507	-0.248942	-0.0964249	-0.0475404
815.69	35.1827	24.6436	7.0995	-0.245701	-0.0950428	-0.0480579
816.24	35.4918	24.8081	7.15318	-0.2423	-0.0935949	-0.0485737
816.79	35.7994	24.97	7.20613	-0.238737	-0.0920808	-0.049088
817.34	36.1055	25.1292	7.25837	-0.235014	-0.0905006	-0.0496008
817.89	36.4096	25.285	7.30966	-0.23112	-0.0888501	-0.050111
818.44	36.7117	25.4377	7.36008	-0.227059	-0.0871307	-0.050619
818.99	37.0121	25.5874	7.40966	-0.222833	-0.0853436	-0.0511251
819.55	37.3104	25.7337	7.4583	-0.218435	-0.0834859	-0.0516288
820.11	37.6064	25.8765	7.50595	-0.21386	-0.0815555	-0.0521297
820.67	37.8997	26.0154	7.55249	-0.209104	-0.0795502	-0.0526274
821.23	38.19	26.1501	7.59778	-0.204158	-0.0774668	-0.0531211
821.8	38.4779	26.2811	7.64206	-0.199032	-0.0753096	-0.053612
822.38	38.7647	26.4097	7.6857	-0.193745	-0.0730861	-0.0541021
822.96	39.0508	26.5362	7.72882	-0.188301	-0.070798	-0.0545919
823.55	39.3372	26.6613	7.77168	-0.182711	-0.0684497	-0.0550827
824.13	39.6236	26.7851	7.81426	-0.176973	-0.0660409	-0.0555744
824.71	39.9094	26.9068	7.85635	-0.171078	-0.0635675	-0.056066
825.29	40.1954	27.0271	7.89817	-0.165036	-0.0610336	-0.0565587
825.88	40.4821	27.1466	7.93987	-0.158854	-0.0584421	-0.0570533
826.47	40.7684	27.2642	7.98115	-0.152513	-0.0557857	-0.0575481
827.07	41.0533	27.3789	8.02166	-0.145992	-0.0530551	-0.0580415
827.67	41.3358	27.4898	8.06114	-0.139276	-0.050244	-0.058532
828.26	41.6144	27.5957	8.09913	-0.132338	-0.0473421	-0.0590175
828.85	41.8893	27.6964	8.13566	-0.125178	-0.0443485	-0.059498
829.43	42.161	27.7927	8.17091	-0.117803	-0.0412669	-0.0599745
830.01	42.4285	27.8833	8.20453	-0.110192	-0.0380883	-0.0604452
830.58	42.6907	27.9675	8.23626	-0.102328	-0.0348057	-0.0609087
831.16	42.9479	28.0454	8.26612	-0.0942119	-0.0314195	-0.0613652
831.73	43.1998	28.1168	8.29405	-0.0858412	-0.0279287	-0.0618144
832.31	43.4464	28.1816	8.32006	-0.0772147	-0.0243328	-0.0622564
832.89	43.6882	28.2403	8.34426	-0.0683381	-0.0206341	-0.0626918
833.47	43.9239	28.2917	8.36631	-0.0591906	-0.0168241	-0.0631188
834.05	44.1521	28.3344	8.38572	-0.0497434	-0.012891	-0.0635351
834.63	44.3723	28.3681	8.40239	-0.0399905	-0.00883214	-0.06394
835.2	44.5839	28.3921	8.41613	-0.0299191	-0.00464242	-0.0643326
835.78	44.7876	28.407	8.42712	-0.0195386	-0.000325703	-0.0647139
836.35	44.9851	28.4145	8.4359	-0.00887561	0.00410706	-0.0650865
836.92	45.1766	28.4146	8.44251	0.00206903	0.00865552	-0.0654508
837.5	45.3627	28.4081	8.44717	0.0132863	0.0133159	-0.0658077
838.09	45.5439	28.3951	8.44996	0.0247725	0.0180868	-0.0661578
838.68	45.7196	28.3753	8.45076	0.0365349	0.022971	-0.0665004
839.28	45.8909	28.3497	8.44991	0.0485569	0.0279619	-0.0668372
839.89	46.0592	28.3194	8.44776	0.0608213	0.0330523	-0.0671701
840.5	46.223	28.2832	8.44392	0.0733502	0.0382512	-0.067497
841.12	46.3809	28.2396	8.43792	0.0861722	0.0435704	-0.0678157
841.74	46.5321	28.188	8.42957	0.0992992	0.0490149	-0.0681251
842.36	46.6753	28.127	8.41842	0.112757	0.0545954	-0.068423
842.97	46.8111	28.0574	8.40467	0.126537	0.0603079	-0.0687103
843.56	46.9412	27.9806	8.38885	0.140612	0.0661415	-0.0689899
844.15	47.0648	27.8958	8.3707	0.154997	0.0721028	-0.0692603
844.74	47.1815	27.8028	8.35011	0.169702	0.0781951	-0.069521
845.32	47.2926	27.7022	8.32729	0.184693	0.0844031	-0.0697716
845.92	47.3991	27.5948	8.3023	0.199931	0.0907096	-0.0700103
846.53	47.5023	27.4813	8.27541	0.215385	0.0971	-0.0702371
847.12	47.6044	27.3633	8.247	0.231005	0.103552	-0.070452
847.68	47.705	27.2405	8.21694	0.246783	0.110061	-0.0706535
848.22	47.8037	27.1121	8.185	0.262731	0.116633	-0.0708402
848.75	47.9019	26.9791	8.15137	0.278807	0.123247	-0.0710108
849.29	48.0004	26.842	8.11611	0.294976	0.129889	-0.0711637
849.83	48.0997	26.701	8.07934	0.311232	0.136555	-0.0712995
850.4	48.2009	26.5571	8.04137	0.32756	0.143238	-0.0714196
850.99	48.3044	26.4106	8.00224	0.343951	0.149935	-0.0715237
851.59	48.4102	26.2615	7.96201	0.360404	0.156646	-0.071612
852.17	48.52	26.1109	7.92091	0.376876	0.16335	-0.0716839
852.72	48.6355	25.9598	7.87914	0.393308	0.170021	-0.0717372
853.27	48.7577	25.8089	7.83691	0.40968	0.17665	-0.0717723
853.8	48.8879	25.6591	7.79448	0.425959	0.183221	-0.0717891
854.33	49.0256	25.5099	7.75163	0.442156	0.18974	-0.0717864
854.86	49.1688	25.3598	7.70796	0.458316	0.196226	-0.0717636
855.4	49.3177	25.2087	7.66339	0.474434	0.202677	-0.0717194
855.94	49.4713	25.0558	7.61767	0.490522	0.209096	-0.0716525
856.5	49.6301	24.9011	7.57082	0.506576	0.215483	-0.0715627
857.05	49.795	24.7457	7.5231	0.52257	0.221825	-0.0714502
857.6	49.9651	24.5885	7.47423	0.538527	0.228133	-0.0713142
858.15	50.1395	24.4289	7.424	0.554472	0.234416	-0.0711541
858.72	50.3199	24.2681	7.3727	0.570349	0.240651	-0.070969
859.3	50.5088	24.1074	7.32064	0.586096	0.246808	-0.0707574
859.84	50.7072	23.9476	7.26803	0.601676	0.252872	-0.0705186
860.36	50.9176	23.7905	7.21525	0.617028	0.258813	-0.070252
860.87	51.1394	23.6354	7.16216	0.632157	0.264634	-0.0699564
861.37	51.3711	23.481	7.10835	0.647105	0.270354	-0.0696311
861.87	51.6142	23.3283	7.05406	0.661828	0.275951	-0.0692748
862.38	51.8694	23.1778	6.99935	0.676296	0.281414	-0.0688865
862.92	52.1366	23.0293	6.94422	0.690527	0.286749	-0.0684669
863.48	52.4159	22.8831	6.88883	0.704523	0.291957	-0.0680175
864.07	52.7069	22.739	6.8331	0.718301	0.297048	-0.0675385
864.63	53.0085	22.5962	6.77689	0.731899	0.302036	-0.0670312
865.19	53.3218	22.4556	6.72041	0.745288	0.306911	-0.0664951
865.74	53.6482	22.318	6.66385	0.758428	0.311653	-0.0659294
866.31	53.9875	22.1833	6.60724	0.771333	0.316269	-0.065335
866.87	54.34	22.052	6.55072	0.784	0.320758	-0.064713
867.44	54.7058	21.9239	6.49422	0.796426	0.325118	-0.0640623
868	55.0843	21.7984	6.43755	0.80862	0.329352	-0.0633817
868.56	55.476	21.6758	6.38074	0.82057	0.333455	-0.0626706
869.09	55.8811	21.556	6.32375	0.83226	0.33742	-0.0619277
869.61	56.2995	21.439	6.26659	0.843706	0.341253	-0.0611537
870.13	56.7308	21.3249	6.20936	0.854926	0.344963	-0.0603505
870.65	57.1749	21.2134	6.15197	0.865924	0.348551	-0.0595176
871.18	57.6315	21.1042	6.09436	0.876711	0.352023	-0.058655
871.72	58.1022	20.9984	6.03675	0.887241	0.355358	-0.0577615
872.24	58.5893	20.8974	5.97944	0.897437	0.358519	-0.0568346
872.73	59.0941	20.8018	5.92258	0.907269	0.361494	-0.0558737
873.21	59.6183	20.713	5.86645	0.916685	0.364259	-0.0548777
873.68	60.1625	20.631	5.8111	0.925664	0.366803	-0.0538454
874.15	60.7267	20.5558	5.75644	0.934211	0.369129	-0.0527764
874.63	61.3126	20.4884	5.70272	0.942266	0.371209	-0.0516688
875.12	61.9222	20.4299	5.65014	0.949773	0.373018	-0.0505207
875.63	62.5549	20.38	5.59867	0.956753	0.374564	-0.0493329
876.17	63.2102	20.3386	5.54832	0.963229	0.37586	-0.0481069
876.72	63.8882	20.3057	5.4991	0.969204	0.376905	-0.0468428
877.25	64.588	20.2808	5.45092	0.974708	0.377714	-0.0455417
877.77	65.3113	20.2648	5.404	0.979693	0.378265	-0.0442022
878.29	66.0606	20.2593	5.35864	0.98408	0.378521	-0.0428218
878.83	66.8358	20.2642	5.31488	0.987874	0.378485	-0.0414008
879.4	67.6377	20.2801	5.27282	0.991062	0.37815	-0.0399393
880.01	68.4653	20.3062	5.23223	0.993662	0.377526	-0.0384364
880.64	69.3161	20.3406	5.19265	0.995741	0.37664	-0.036892
881.25	70.19	20.3829	5.15392	0.997303	0.375494	-0.0353053
881.86	71.0858	20.4324	5.1158	0.998365	0.374097	-0.0336749
882.45	72.0029	20.4885	5.07811	0.998955	0.372459	-0.0320012
883.04	72.9408	20.5509	5.04087	0.999083	0.370586	-0.0302846
883.64	73.898	20.6184	5.00369	0.998796	0.368499	-0.0285248
884.23	74.8722	20.6895	4.96618	0.998148	0.366221	-0.0267218
884.84	75.8649	20.7649	4.92851	0.997103	0.363735	-0.0248745
885.46	76.8778	20.8457	4.89092	0.995603	0.361017	-0.0229813
886.09	77.9113	20.9321	4.85341	0.993643	0.358061	-0.0210416
886.73	78.9666	21.0248	4.8162	0.991183	0.354852	-0.0190546
887.35	80.0424	21.1229	4.77895	0.98826	0.351404	-0.0170198
887.96	81.1355	21.2239	4.74106	0.984955	0.347753	-0.014937
888.58	82.2466	21.3282	4.70258	0.98125	0.343892	-0.0128053
889.2	83.3754	21.4355	4.66338	0.977145	0.33982	-0.0106235
889.83	84.522	21.5459	4.62352	0.97264	0.335537	-0.00839201
890.47	85.6882	21.6605	4.58331	0.9677	0.331026	-0.00611101
891.11	86.8735	21.7791	4.54268	0.962334	0.326292	-0.00378048
891.76	88.0777	21.9016	4.50163	0.956553	0.321341	-0.00140079
892.4	89.3017	22.0285	4.46025	0.950335	0.316161	0.00102872
893.05	90.5458	22.1598	4.41856	0.943664	0.310746	0.00350916
893.71	91.811	22.2963	4.37672	0.936521	0.305086	0.00604039
894.38	93.0984	22.4386	4.33495	0.92888	0.29917	0.0086225
895.05	94.4063	22.5857	4.29289	0.920778	0.293014	0.0112561
895.72	95.7322	22.7355	4.25001	0.912283	0.286648	0.0139417
896.39	97.0755	22.8873	4.20614	0.903411	0.280079	0.0166799
897.05	98.4344	23.04	4.16086	0.894203	0.273325	0.0194716
897.69	99.8091	23.1935	4.11424	0.884655	0.266384	0.0223167
898.34	101.201	23.349	4.06658	0.874733	0.259241	0.025215
898.99	102.609	23.5055	4.01758	0.864473	0.25191	0.0281669
899.64	104.032	23.6621	3.96701	0.853901	0.244406	0.0311728
900.31	105.472	23.8202	3.91521	0.842957	0.236698	0.0342337
900.99	106.932	23.9815	3.86255	0.831567	0.228755	0.0373515
901.67	108.413	24.147	3.80931	0.819681	0.220553	0.0405272
902.33	109.919	24.319	3.75602	0.807211	0.212052	0.0437619
902.99	111.45	24.4973	3.70261	0.794155	0.203251	0.0470566
903.65	113.004	24.6809	3.6488	0.780545	0.194164	0.0504118
904.3	114.584	24.8715	3.59496	0.766309	0.184757	0.053829
904.96	116.192	25.07	3.54135	0.751391	0.175007	0.0573098
905.62	117.828	25.2766	3.48795	0.735796	0.164913	0.0608542
906.26	119.492	25.4915	3.43485	0.719513	0.154473	0.0644623
906.9	121.184	25.7147	3.38204	0.702541	0.143684	0.0681345
907.54	122.904	25.9456	3.32936	0.6849	0.132555	0.0718708
908.17	124.654	26.1859	3.27722	0.666521	0.121056	0.0756726
908.79	126.438	26.4377	3.2261	0.647307	0.109142	0.0795419
909.43	128.256	26.7015	3.17612	0.627239	0.096804	0.0834791
910.09	130.11	26.9783	3.12754	0.606274	0.0840228	0.0874852
910.75	131.999	27.2671	3.08004	0.584447	0.0708136	0.0915604
911.41	133.918	27.5653	3.03297	0.561852	0.0572185	0.0957047
912.08	135.868	27.8726	2.98622	0.538495	0.0432392	0.0999187
912.76	137.847	28.1878	2.93948	0.514409	0.0288909	0.104203
913.44	139.856	28.5107	2.89263	0.489609	0.0141796	0.108558
914.11	141.894	28.8417	2.84581	0.46407	-0.000905936	0.112984
914.76	143.96	29.1793	2.79858	0.437853	-0.0163392	0.117481
915.41	146.05	29.5216	2.75049	0.411018	-0.0320928	0.12205
916.05	148.169	29.8706	2.70196	0.383491	-0.0482006	0.126691
916.68	150.319	30.2283	2.65351	0.355177	-0.064706	0.131407
917.31	152.502	30.5956	2.60536	0.326036	-0.081627	0.136198
917.95	154.721	30.9747	2.558	0.29598	-0.0990035	0.141066
918.61	156.974	31.3645	2.51115	0.265045	-0.11682	0.146012
919.26	159.259	31.7624	2.46413	0.233325	-0.135035	0.151034
919.91	161.576	32.1697	2.41723	0.200767	-0.153672	0.156135
920.56	163.928	32.5867	2.37053	0.167344	-0.172744	0.161315
921.21	166.31	33.0129	2.32412	0.133184	-0.192196	0.166565
921.87	168.72	33.4482	2.27838	0.0984245	-0.211972	0.171873
922.52	171.157	33.8917	2.2333	0.0631877	-0.232019	0.177231
923.18	173.614	34.3419	2.18884	0.0276591	-0.252259	0.182627
923.87	176.092	34.7997	2.14533	-0.00813661	-0.272683	0.188056
924.55	178.593	35.266	2.10307	-0.044229	-0.293305	0.193518
925.24	181.114	35.7404	2.06231	-0.0804612	-0.314058	0.199
925.93	183.651	36.2229	2.02342	-0.116706	-0.334891	0.204491
926.62	186.204	36.7131	1.98623	-0.152936	-0.355792	0.20999
927.31	188.772	37.2092	1.95034	-0.189099	-0.376737	0.215497
928.01	191.353	37.7113	1.91581	-0.225154	-0.397711	0.22101
928.7	193.946	38.219	1.88249	-0.261102	-0.418713	0.22653
929.39	196.55	38.7315	1.85057	-0.296776	-0.439673	0.232044
930.08	199.158	39.2484	1.82047	-0.331963	-0.460502	0.237535
930.8	201.77	39.769	1.7921	-0.366583	-0.481166	0.242997
931.52	204.382	40.2921	1.76543	-0.400514	-0.501612	0.248423
932.25	206.996	40.8189	1.74068	-0.433794	-0.52186	0.253815
932.98	209.616	41.3508	1.71801	-0.466578	-0.541976	0.25918
933.71	212.241	41.8883	1.69763	-0.498843	-0.561953	0.264516
934.44	214.874	42.4326	1.67986	-0.53063	-0.581808	0.269823
935.17	217.513	42.9836	1.66469	-0.56192	-0.601535	0.275099
935.89	220.158	43.5403	1.65199	-0.592616	-0.621092	0.28034
936.59	222.809	44.1037	1.64195	-0.622798	-0.640516	0.285549
937.26	225.469	44.6747	1.63466	-0.652546	-0.659841	0.290732
937.93	228.134	45.2525	1.6303	-0.681663	-0.678983	0.295872
938.63	230.798	45.836	1.62917	-0.709909	-0.697843	0.300952
939.36	233.459	46.4246	1.63139	-0.737152	-0.716364	0.305963
940.08	236.112	47.0169	1.6371	-0.76316	-0.734448	0.310886
940.81	238.757	47.6138	1.6465	-0.787955	-0.752106	0.315723
941.53	241.398	48.2168	1.65973	-0.811677	-0.769399	0.320481
942.25	244.031	48.8251	1.67703	-0.834162	-0.786258	0.325147
942.97	246.656	49.4387	1.69862	-0.855303	-0.802639	0.329713
943.69	249.272	50.0575	1.7243	-0.875154	-0.818565	0.334184
944.41	251.879	50.6805	1.75368	-0.893728	-0.834041	0.338564
945.13	254.479	51.3078	1.78665	-0.911087	-0.849093	0.342859
945.85	257.074	51.9397	1.82291	-0.92736	-0.863777	0.347081
946.57	259.661	52.5754	1.86248	-0.942446	-0.87805	0.351222
947.3	262.239	53.2145	1.90557	-0.956191	-0.891848	0.35527
948.03	264.807	53.8563	1.95187	-0.968643	-0.905189	0.359233
948.77	267.364	54.5003	2.00112	-0.979798	-0.918074	0.363111
949.51	269.912	55.1468	2.05355	-0.989632	-0.930492	0.366901
950.24	272.45	55.7967	2.10935	-0.998177	-0.942459	0.370604
950.98	274.978	56.45	2.16865	-1.00538	-0.953954	0.374217
951.73	277.496	57.107	2.23172	-1.01118	-0.964953	0.377731
952.47	280.003	57.7674	2.29831	-1.01564	-0.975478	0.381153
953.21	282.501	58.4306	2.36797	-1.01882	-0.985558	0.384492
953.95	284.991	59.0967	2.44078	-1.02072	-0.995197	0.387749
954.69	287.473	59.766	2.51667	-1.0214	-1.00441	0.390925
955.43	289.943	60.4378	2.59589	-1.02066	-1.01313	0.394009
956.17	292.397	61.1116	2.67898	-1.01824	-1.02123	0.396975
956.91	294.83	61.7867	2.76602	-1.01401	-1.02867	0.399816
957.64	297.24	62.4624	2.85722	-1.00778	-1.03536	0.402516
958.38	299.624	63.1385	2.95281	-0.99946	-1.04128	0.405069
959.12	301.983	63.8155	3.05285	-0.989075	-1.04642	0.407475
959.86	304.313	64.4927	3.15772	-0.976399	-1.05069	0.409716
960.59	306.609	65.1697	3.26783	-0.961221	-1.05401	0.411774
961.33	308.872	65.8464	3.38293	-0.943608	-1.0564	0.413656
962.06	311.105	66.5224	3.50262	-0.923652	-1.05791	0.415372
962.8	313.307	67.1976	3.62685	-0.901358	-1.05853	0.416923
963.53	315.48	67.872	3.75533	-0.876832	-1.05832	0.418319
964.26	317.62	68.5449	3.88831	-0.849898	-1.05719	0.419545
964.99	319.722	69.2159	4.02634	-0.820257	-1.05502	0.420578
965.72	321.786	69.8844	4.16927	-0.787925	-1.05182	0.42142
966.45	323.81	70.5502	4.31708	-0.752849	-1.04757	0.422067
967.19	325.797	71.2142	4.46992	-0.715098	-1.0423	0.422524
967.92	327.752	71.8781	4.62777	-0.674905	-1.0361	0.422805
968.65	329.676	72.5425	4.79083	-0.63228	-1.02899	0.422911
969.38	331.57	73.2088	4.95939	-0.587282	-1.02099	0.422842
970.11	333.438	73.8773	5.13332	-0.54001	-1.01214	0.422607
970.85	335.28	74.5478	5.31246	-0.490498	-1.00246	0.422209
971.58	337.099	75.222	5.49689	-0.438911	-0.992023	0.421659
972.32	338.902	75.901	5.68657	-0.385445	-0.980907	0.420972
973.05	340.684	76.5845	5.8817	-0.329961	-0.969056	0.420135
973.78	342.442	77.2719	6.08263	-0.272247	-0.956383	0.419132
974.5	344.175	77.9632	6.28941	-0.212272	-0.942874	0.41796
975.24	345.88	78.6576	6.5022	-0.149892	-0.92847	0.416608
975.97	347.56	79.3566	6.7211	-0.0852374	-0.913227	0.415086
976.71	349.222	80.0622	6.94612	-0.0185947	-0.897268	0.413411
977.44	350.866	80.7746	7.17746	0.0501045	-0.880567	0.411577
978.17	352.491	81.4943	7.41531	0.120864	-0.863121	0.409584
978.9	354.098	82.221	7.65957	0.193687	-0.844932	0.407431
979.64	355.682	82.9534	7.91012	0.268709	-0.82594	0.405111
980.39	357.246	83.6917	8.16691	0.345894	-0.806162	0.402627
981.14	358.789	84.4357	8.42981	0.425207	-0.785614	0.399983
981.89	360.309	85.1852	8.69892	0.506736	-0.764258	0.397172
982.64	361.806	85.9403	8.97444	0.590542	-0.742071	0.394188
983.39	363.278	86.7002	9.25631	0.676695	-0.719023	0.391027
984.13	364.723	87.464	9.54445	0.765302	-0.695068	0.387684
984.87	366.143	88.2333	9.83902	0.856221	-0.670269	0.384166
985.62	367.546	89.01	10.1401	0.949219	-0.644727	0.380489
986.36	368.932	89.7948	10.4478	1.04424	-0.618466	0.376655
987.09	370.306	90.5895	10.7623	1.14114	-0.59155	0.372674
987.82	371.667	91.3937	11.0835	1.23993	-0.563973	0.368543
988.56	373.012	92.2061	11.4113	1.34074	-0.53568	0.364257
989.29	374.344	93.028	11.7458	1.44346	-0.506724	0.359823
990.02	375.666	93.8601	12.0871	1.54797	-0.477149	0.355248
990.75	376.972	94.7013	12.4352	1.65452	-0.446857	0.350514
991.48	378.258	95.5505	12.7907	1.76337	-0.415735	0.3456
992.21	379.517	96.4068	13.1535	1.87472	-0.3837	0.340493
992.94	380.744	97.2683	13.5239	1.98889	-0.350617	0.335169
993.67	381.938	98.1355	13.9021	2.10589	-0.316481	0.329625
994.4	383.103	99.0093	14.2881	2.22561	-0.28134	0.323869
995.13	384.231	99.8887	14.6823	2.34833	-0.245082	0.31788
995.85	385.32	100.773	15.0849	2.47425	-0.207619	0.311643
996.58	386.368	101.662	15.496	2.60336	-0.168955	0.305157
997.3	387.376	102.555	15.9153	2.73569	-0.129076	0.298421
998.03	388.343	103.453	16.343	2.87127	-0.0879774	0.291435
998.76	389.271	104.355	16.7791	3.01002	-0.0456891	0.284203
999.53	390.154	105.262	17.2238	3.15219	-0.00210217	0.276706
1000.3	390.984	106.17	17.6774	3.29816	0.0429339	0.268917
1001.1	391.759	107.08	18.14	3.44799	0.0894511	0.260831
1001.8	392.477	107.991	18.6118	3.60185	0.137517	0.252435
1002.6	393.14	108.903	19.0927	3.75961	0.187078	0.243738
1003.4	393.757	109.82	19.5828	3.92093	0.237988	0.234763
1004.1	394.327	110.742	20.0822	4.08581	0.290241	0.22551
1004.9	394.855	111.67	20.591	4.25411	0.343783	0.215986
1005.6	395.342	112.605	21.1091	4.4258	0.398594	0.206196
1006.4	395.785	113.545	21.6367	4.60097	0.454713	0.196131
1007.2	396.19	114.493	22.1737	4.77939	0.512048	0.185807
1007.9	396.562	115.45	22.7202	4.96087	0.570504	0.175238
1008.7	396.895	116.415	23.2764	5.14566	0.630198	0.164405
1009.4	397.182	117.387	23.8425	5.33413	0.691279	0.153281
1010.2	397.418	118.363	24.4188	5.52643	0.753811	0.141854
1010.9	397.597	119.344	25.0055	5.72288	0.817931	0.1301
1011.7	397.722	120.329	25.6026	5.92337	0.883586	0.118028
1012.5	397.801	121.322	26.2101	6.12754	0.950629	0.105661
1013.2	397.829	122.32	26.8282	6.3356	1.01914	0.0929838
1014	397.805	123.326	27.4571	6.54766	1.08918	0.0799883
1014.8	397.733	124.336	28.0961	6.76346	1.16065	0.0667351
1015.6	397.615	125.352	28.7441	6.9828	1.23353	0.0532999
1016.3	397.456	126.371	29.4005	7.20543	1.30774	0.0397379
1017.1	397.263	127.395	30.0642	7.43093	1.38315	0.026133
1017.9	397.033	128.422	30.7351	7.65937	1.45981	0.0125075
1018.7	396.764	129.452	31.4131	7.89088	1.53777	-0.0011424
1019.5	396.46	130.483	32.0973	8.1252	1.61698	-0.0147369
1020.3	396.122	131.514	32.7867	8.36214	1.69741	-0.0282063
1021.1	395.752	132.545	33.4814	8.60163	1.77902	-0.0415425
1021.9	395.356	133.578	34.1813	8.84349	1.86173	-0.0547324
1022.7	394.933	134.614	34.8864	9.08765	1.94554	-0.0677558
1023.4	394.484	135.652	35.5967	9.33411	2.03043	-0.0806153
1024.2	394.016	136.692	36.3113	9.58257	2.11633	-0.0932299
1025	393.531	137.732	37.0287	9.83266	2.20316	-0.105488
1025.8	393.034	138.772	37.7485	10.0842	2.29084	-0.117357
1026.6	392.529	139.813	38.4702	10.337	2.37932	-0.128779
1027.4	392.013	140.854	39.194	10.5911	2.46865	-0.139765
1028.2	391.479	141.895	39.9206	10.8469	2.55897	-0.15038
1029	390.925	142.935	40.65	11.1046	2.65031	-0.160606
1029.8	390.347	143.972	41.3821	11.3642	2.74274	-0.170451
1030.5	389.746	145.007	42.1171	11.6258	2.83627	-0.179907
1031.3	389.127	146.041	42.8544	11.889	2.93082	-0.188931
1032.1	388.483	147.072	43.5946	12.1543	3.02649	-0.197555
1032.9	387.812	148.102	44.3382	12.4217	3.12335	-0.20581
1033.6	387.119	149.128	45.0838	12.6909	3.2213	-0.2136
1034.4	386.412	150.15	45.8301	12.9615	3.32022	-0.220807
1035.2	385.693	151.167	46.5763	13.2332	3.42006	-0.227365
1036	384.97	152.179	47.321	13.5056	3.52067	-0.233165
1036.8	384.241	153.185	48.0642	13.7788	3.62212	-0.238209
1037.5	383.5	154.185	48.8069	14.0531	3.72453	-0.242556
1038.3	382.75	155.177	49.5479	14.3283	3.82783	-0.246123
1039.1	381.993	156.162	50.2867	14.6041	3.93198	-0.248853
1039.9	381.228	157.14	51.0237	14.8808	4.03702	-0.250777
1040.7	380.459	158.112	51.7593	15.1583	4.1429	-0.251912
1041.5	379.682	159.079	52.494	15.4366	4.24966	-0.252288
1042.3	378.895	160.042	53.2288	15.716	4.35736	-0.251972
1043.1	378.101	161.002	53.9632	15.9964	4.46594	-0.250916
1043.9	377.304	161.956	54.6963	16.2774	4.57535	-0.249044
1044.7	376.505	162.907	55.4286	16.5592	4.68557	-0.246386
1045.5	375.705	163.856	56.1602	16.8416	4.79658	-0.242947
1046.3	374.902	164.801	56.8911	17.1247	4.90841	-0.238708
1047.1	374.095	165.743	57.6214	17.4087	5.02112	-0.233678
1047.9	373.284	166.68	58.3508	17.6934	5.13469	-0.227828
1048.6	372.468	167.613	59.0788	17.9788	5.24915	-0.221119
1049.4	371.647	168.541	59.806	18.2651	5.36449	-0.213585
1050.2	370.822	169.467	60.5331	18.5522	5.48073	-0.20527
1051	369.991	170.39	61.2603	18.8403	5.59788	-0.196173
1051.8	369.153	171.311	61.9879	19.1294	5.71597	-0.186313
1052.5	368.312	172.228	62.7148	19.4192	5.83494	-0.175603
1053.3	367.476	173.141	63.4391	19.7093	5.95466	-0.163894
1054.1	366.647	174.048	64.1602	19.9994	6.07509	-0.151133
1054.9	365.832	174.949	64.8769	20.2892	6.19613	-0.137221
1055.7	365.03	175.843	65.5887	20.5786	6.31777	-0.122115
1056.4	364.242	176.729	66.2958	20.8676	6.44003	-0.105818
1057.2	363.471	177.607	66.9967	21.1559	6.56284	-0.0882145
1058	362.724	178.475	67.69	21.4431	6.6861	-0.0691971
1058.8	361.999	179.334	68.3764	21.7294	6.80986	-0.0488027
1059.5	361.294	180.185	69.0567	22.0149	6.93412	-0.0270834
1060.3	360.61	181.029	69.7311	22.2995	7.05889	-0.00404285
1061.1	359.945	181.867	70.4005	22.5836	7.18423	0.0202627
1061.8	359.303	182.698	71.0637	22.8667	7.31005	0.0459225
1062.6	358.691	183.52	71.7189	23.1484	7.43624	0.0730903
1063.4	358.109	184.334	72.3662	23.4288	7.5628	0.101756
1064.2	357.559	185.139	73.0056	23.7076	7.68971	0.131942
1065	357.037	185.935	73.6372	23.9852	7.81704	0.163624
1065.8	356.534	186.724	74.2627	24.262	7.94496	0.196696
1066.7	356.048	187.503	74.8819	24.5381	8.07351	0.23116
1067.5	355.573	188.272	75.4952	24.8138	8.20278	0.266998
1068.3	355.108	189.031	76.1031	25.0893	8.33284	0.304162
1069.1	354.651	189.782	76.7062	25.3646	8.4637	0.342634
1069.9	354.195	190.523	77.3053	25.6401	8.59549	0.38234
1070.7	353.733	191.257	77.9017	25.9163	8.72836	0.423192
1071.5	353.268	191.98	78.4946	26.193	8.86223	0.465259
1072.3	352.805	192.694	79.0825	26.4697	8.99704	0.50865
1073.2	352.346	193.396	79.6655	26.7465	9.13278	0.553381
1074	351.892	194.087	80.2426	27.0231	9.26938	0.599525
1074.8	351.44	194.767	80.8146	27.2998	9.40697	0.647025
1075.6	350.977	195.435	81.3832	27.5773	9.54573	0.695752
1076.4	350.504	196.091	81.948	27.8555	9.68568	0.745744
1077.2	350.02	196.735	82.5089	28.1344	9.82684	0.797009
1078	349.524	197.366	83.0661	28.4141	9.9692	0.849548
1078.9	349.024	197.985	83.6189	28.6943	10.1127	0.903418
1079.7	348.516	198.593	84.1677	28.975	10.2573	0.958604
1080.5	348.002	199.191	84.7129	29.2564	10.4031	1.01509
1081.3	347.482	199.777	85.254	29.5382	10.55	1.07291
1082.1	346.957	200.351	85.7906	29.8205	10.6981	1.13211
1082.9	346.43	200.913	86.3225	30.103	10.8472	1.19271
1083.7	345.905	201.464	86.8492	30.3857	10.9974	1.25477
1084.5	345.375	202.004	87.3715	30.6687	11.1487	1.31823
1085.3	344.831	202.532	87.8907	30.9527	11.3014	1.38298
1086.1	344.27	203.048	88.4072	31.2379	11.4554	1.44899
1086.9	343.683	203.551	88.9217	31.5246	11.611	1.51622
1087.7	343.072	204.042	89.4344	31.8129	11.768	1.58467
1088.6	342.441	204.521	89.9445	32.1024	11.9266	1.65439
1089.4	341.787	204.988	90.453	32.3934	12.0866	1.72533
1090.2	341.103	205.443	90.9604	32.6862	12.2483	1.79745
1091	340.397	205.885	91.4654	32.9804	12.4115	1.87085
1091.8	339.677	206.314	91.9663	33.2755	12.576	1.94569
1092.6	338.948	206.728	92.4621	33.5711	12.7419	2.02204
1093.4	338.22	207.127	92.951	33.8666	12.9088	2.10007
1094.1	337.493	207.511	93.4328	34.162	13.0769	2.17979
1094.9	336.761	207.878	93.9082	34.4577	13.2463	2.26114
1095.7	336.033	208.229	94.3757	34.753	13.4167	2.34427
1096.5	335.312	208.561	94.8339	35.0478	13.5882	2.42928
1097.3	334.6	208.876	95.2831	35.3419	13.7607	2.51616
1098.1	333.896	209.173	95.7232	35.6354	13.9342	2.60492
1098.9	333.202	209.453	96.1542	35.9282	14.1087	2.69559
1099.7	332.514	209.716	96.5765	36.2206	14.2844	2.78812
1100.5	331.839	209.96	96.9888	36.512	14.4609	2.88265
1101.2	331.189	210.185	97.3888	36.8018	14.6383	2.97934
1102	330.565	210.39	97.7763	37.0899	14.8164	3.07824
1102.8	329.973	210.576	98.1502	37.3759	14.9952	3.17943
1103.6	329.406	210.741	98.5115	37.6602	15.1748	3.28285
1104.4	328.851	210.886	98.862	37.9435	15.3554	3.38834
1105.2	328.308	211.011	99.202	38.226	15.537	3.49591
1106	327.769	211.116	99.5321	38.5078	15.7198	3.60551
1106.8	327.234	211.2	99.8526	38.7893	15.9039	3.71711
1107.6	326.704	211.264	100.163	39.0701	16.089	3.83076
1108.4	326.17	211.308	100.465	39.3508	16.2755	3.94636
1109.2	325.625	211.332	100.759	39.632	16.4635	4.06382
1110	325.077	211.335	101.045	39.913	16.6529	4.18327
1110.8	324.536	211.315	101.319	40.1932	16.8434	4.30488
1111.6	324.006	211.274	101.582	40.4724	17.035	4.42873
1112.4	323.498	211.208	101.831	40.7499	17.2276	4.55497
1113.2	323.006	211.119	102.067	41.0261	17.4212	4.68356
1113.9	322.517	211.007	102.292	41.3016	17.616	4.81433
1114.7	322.037	210.871	102.504	41.5762	17.8121	4.94739
1115.5	321.567	210.71	102.705	41.8497	18.0093	5.08278
1116.3	321.106	210.527	102.893	42.1222	18.2076	5.22035
1117.1	320.654	210.323	103.071	42.3938	18.4069	5.35993
1117.9	320.209	210.1	103.239	42.6646	18.6071	5.50136
1118.6	319.764	209.86	103.4	42.935	18.8083	5.64439
1119.4	319.323	209.603	103.553	43.2049	19.0104	5.789
1120.2	318.892	209.33	103.696	43.4738	19.2133	5.93528
1121	318.469	209.042	103.832	43.7419	19.4167	6.08302
1121.8	318.058	208.742	103.96	44.009	19.6208	6.23207
1122.6	317.653	208.428	104.081	44.2754	19.8253	6.3824
1123.4	317.248	208.102	104.197	44.5415	20.0306	6.53393
1124.1	316.842	207.763	104.307	44.8073	20.2366	6.68662
1124.9	316.432	207.412	104.412	45.0729	20.4434	6.84047
1125.6	316.018	207.05	104.512	45.3386	20.6508	6.99526
1126.4	315.598	206.68	104.61	45.6042	20.8588	7.15074
1127.1	315.17	206.304	104.706	45.8701	21.0672	7.30679
1127.9	314.728	205.922	104.801	46.1365	21.2763	7.46327
1128.7	314.278	205.534	104.895	46.4032	21.4857	7.62023
1129.4	313.826	205.138	104.985	46.6696	21.6957	7.77793
1130.2	313.375	204.735	105.072	46.9356	21.9059	7.93635
1130.9	312.93	204.322	105.153	47.2009	22.1165	8.09557
1131.7	312.49	203.901	105.23	47.4655	22.3272	8.25559
1132.4	312.052	203.473	105.303	47.7296	22.5383	8.41626
1133.2	311.62	203.035	105.371	47.993	22.7496	8.57772
1133.9	311.197	202.588	105.433	48.2553	22.9611	8.74011
1134.7	310.78	202.133	105.491	48.5169	23.1728	8.90317
1135.4	310.367	201.673	105.545	48.7779	23.3845	9.06658
1136.1	309.957	201.211	105.599	49.0384	23.5961	9.23019
1136.9	309.543	200.749	105.653	49.2988	23.8076	9.3937
1137.6	309.13	200.288	105.706	49.5588	24.019	9.55715
1138.4	308.725	199.824	105.757	49.8181	24.2301	9.72076
1139.1	308.324	199.36	105.808	50.0766	24.441	9.88432
1139.8	307.93	198.898	105.858	50.3345	24.6514	10.0477
1140.6	307.54	198.436	105.907	50.5918	24.8615	10.211
1141.3	307.148	197.973	105.957	50.8488	25.0715	10.3742
1142.1	306.755	197.509	106.005	51.1055	25.2814	10.5375
1142.8	306.359	197.041	106.052	51.3618	25.4912	10.7009
1143.5	305.959	196.57	106.098	51.6179	25.7011	10.8643
1144.3	305.551	196.098	106.145	51.874	25.9109	11.0277
1145	305.134	195.624	106.192	52.1301	26.1207	11.1909
1145.7	304.703	195.148	106.239	52.3866	26.3306	11.3541
1146.5	304.26	194.67	106.287	52.6433	26.5406	11.5171
1147.2	303.81	194.189	106.335	52.8998	26.7506	11.6802
1147.9	303.352	193.705	106.382	53.1562	26.9605	11.8431
1148.7	302.889	193.221	106.43	53.4124	27.1703	12.006
1149.4	302.419	192.733	106.476	53.6685	27.38	12.1687
1150.1	301.936	192.241	106.523	53.9246	27.5898	12.3315
1150.9	301.442	191.745	106.569	54.1808	27.7997	12.4943
1151.6	300.937	191.243	106.613	54.4369	28.0098	12.6573
1152.4	300.419	190.738	106.657	54.6931	28.2198	12.8201
1153.1	299.889	190.233	106.704	54.9494	28.4297	12.9825
1153.9	299.344	189.731	106.753	55.2061	28.6393	13.1443
1154.6	298.781	189.233	106.806	55.4632	28.8486	13.3052
1155.4	298.202	188.741	106.864	55.7207	29.0575	13.4652
1156.1	297.608	188.253	106.926	55.9786	29.266	13.6244
1156.8	296.998	187.774	106.994	56.2369	29.4739	13.7823
1157.6	296.372	187.306	107.068	56.4956	29.681	13.9388
1158.3	295.729	186.847	107.149	56.7548	29.8875	14.094
1159	295.064	186.396	107.237	57.0147	30.0935	14.2479
1159.7	294.377	185.952	107.33	57.2753	30.2991	14.4007
1160.5	293.666	185.513	107.429	57.5367	30.5043	14.5524
1161.2	292.931	185.082	107.534	57.7988	30.709	14.7028
1161.9	292.17	184.663	107.648	58.0619	30.9131	14.8516
1162.7	291.382	184.254	107.771	58.326	31.1166	14.9987
1163.4	290.564	183.857	107.902	58.5913	31.3195	15.1442
1164.2	289.722	183.47	108.041	58.8573	31.5217	15.2881
1164.9	288.861	183.091	108.186	59.1238	31.7234	15.4308
1165.6	287.984	182.718	108.336	59.3904	31.9243	15.5723
1166.3	287.097	182.351	108.489	59.6569	32.1245	15.7127
1167	286.202	181.989	108.646	59.9231	32.324	15.8521
1167.7	285.296	181.63	108.805	60.1891	32.5228	15.9907
1168.4	284.385	181.273	108.965	60.4545	32.721	16.1286
1169.1	283.474	180.914	109.124	60.719	32.9186	16.2661
1169.8	282.563	180.556	109.282	60.9825	33.1155	16.4031
1170.5	281.649	180.2	109.442	61.2453	33.3115	16.5393
1171.2	280.733	179.848	109.603	61.5073	33.5068	16.6747
1171.9	279.813	179.5	109.766	61.7687	33.7011	16.8091
1172.6	278.895	179.156	109.93	62.029	33.8944	16.9427
1173.3	277.986	178.81	110.092	62.2878	34.0869	17.0759
1174	277.087	178.464	110.252	62.5449	34.2784	17.2086
1174.7	276.201	178.119	110.409	62.8003	34.4689	17.3408
1175.4	275.326	177.772	110.564	63.0539	34.6583	17.4726
1176.1	274.457	177.427	110.718	63.3061	34.8469	17.6038
1176.8	273.593	177.081	110.87	63.5569	35.0344	17.7344
1177.6	272.733	176.735	111.021	63.8064	35.2211	17.8646
1178.3	271.877	176.388	111.171	64.0545	35.4069	17.9941
1179	271.025	176.042	111.32	64.3012	35.5916	18.1229
1179.7	270.175	175.696	111.468	64.5467	35.7754	18.251
1180.5	269.322	175.353	111.618	64.7913	35.9583	18.3782
1181.3	268.471	175.011	111.766	65.0345	36.1401	18.5047
1182	267.632	174.665	111.911	65.2757	36.321	18.6309
1182.8	266.807	174.315	112.051	65.5149	36.5008	18.7568
1183.5	266.003	173.959	112.185	65.7514	36.6796	18.8827
1184.2	265.218	173.597	112.313	65.9855	36.8574	19.0086
1185	264.447	173.23	112.436	66.2174	37.0341	19.1343
1185.7	263.694	172.856	112.553	66.4468	37.2099	19.26
1186.5	262.962	172.475	112.662	66.6735	37.3846	19.3858
1187.2	262.248	172.087	112.766	66.8978	37.5582	19.5115
1187.9	261.549	171.698	112.865	67.1198	37.7306	19.6367
1188.7	260.861	171.309	112.963	67.3398	37.9017	19.7611
1189.4	260.178	170.924	113.061	67.5581	38.0714	19.8844
1190.2	259.502	170.543	113.159	67.7748	38.2396	20.0065
1190.9	258.837	170.164	113.256	67.9894	38.4063	20.1277
1191.7	258.181	169.792	113.354	68.2022	38.5714	20.2475
1192.4	257.53	169.428	113.454	68.4133	38.7348	20.3658
1193.2	256.885	169.071	113.556	68.6228	38.8965	20.4825
1193.9	256.244	168.723	113.661	68.8307	39.0565	20.5976
1194.7	255.607	168.382	113.767	69.037	39.2148	20.7112
1195.4	254.975	168.048	113.876	69.2416	39.3714	20.8233
1196.2	254.344	167.724	113.987	69.4448	39.5262	20.9335
1196.9	253.709	167.414	114.105	69.6468	39.6791	21.0415
1197.7	253.07	167.119	114.229	69.8478	39.83	21.1472
1198.4	252.422	166.84	114.362	70.048	39.9789	21.2503
1199.1	251.771	166.577	114.5	70.247	40.1257	21.3511
1199.8	251.125	166.323	114.642	70.4442	40.2706	21.4499
1200.6	250.486	166.08	114.787	70.6396	40.4134	21.547
1201.3	249.86	165.844	114.932	70.8327	40.5542	21.6423
1202	249.247	165.616	115.078	71.0234	40.693	21.7361
1202.7	248.646	165.395	115.225	71.2119	40.8298	21.8282
1203.4	248.062	165.18	115.371	71.3977	40.9645	21.919
1204.1	247.502	164.966	115.514	71.5803	41.0972	22.0086
1204.8	246.961	164.758	115.655	71.7602	41.2278	22.0969
1205.5	246.433	164.559	115.798	71.9377	41.3562	22.1833
1206.2	245.917	164.372	115.944	72.1129	41.4823	22.2676
1206.9	245.406	164.199	116.094	72.2862	41.6059	22.3494
1207.6	244.906	164.041	116.248	72.4572	41.7271	22.429
1208.3	244.424	163.891	116.403	72.6255	41.8459	22.5068
1209.1	243.958	163.752	116.56	72.7911	41.9623	22.5825
1209.8	243.508	163.625	116.718	72.9541	42.0761	22.6561
1210.5	243.074	163.508	116.879	73.1145	42.1875	22.7277
1211.2	242.649	163.402	117.041	73.2727	42.2967	22.7974
1212	242.236	163.304	117.205	73.4286	42.4038	22.8655
1212.7	241.835	163.21	117.368	73.5821	42.5091	22.9322
1213.3	241.443	163.123	117.532	73.7336	42.6124	22.9976
1214	241.057	163.044	117.698	73.8831	42.7139	23.0613
1214.7	240.674	162.972	117.865	74.0309	42.8136	23.1236
1215.4	240.291	162.907	118.035	74.1773	42.9116	23.1844
1216.1	239.91	162.848	118.207	74.3221	43.0081	23.244
1216.8	239.536	162.791	118.377	74.4648	43.103	23.3026
1217.5	239.171	162.738	118.547	74.6056	43.1963	23.3602
1218.2	238.815	162.686	118.716	74.7441	43.288	23.4169
1218.9	238.469	162.636	118.883	74.8806	43.3782	23.4729
1219.6	238.126	162.584	119.048	75.0153	43.4672	23.5283
1220.3	237.79	162.53	119.21	75.1482	43.5552	23.5834
1221	237.46	162.472	119.368	75.2792	43.6421	23.6385
1221.7	237.136	162.411	119.523	75.4084	43.728	23.6932
1222.4	236.815	162.351	119.678	75.5359	43.8126	23.7473
1223	236.496	162.292	119.832	75.6618	43.8959	23.8006
1223.7	236.176	162.238	119.987	75.7863	43.9778	23.8529
1224.3	235.855	162.187	120.143	75.9094	44.0583	23.9042
1225	235.536	162.138	120.298	76.0309	44.1375	23.9548
1225.7	235.217	162.093	120.455	76.1508	44.2152	24.0044
1226.3	234.898	162.055	120.613	76.2693	44.2914	24.0528
1227	234.578	162.02	120.772	76.3864	44.3662	24.1002
1227.7	234.254	161.986	120.932	76.5024	44.4399	24.147
1228.4	233.924	161.953	121.092	76.6173	44.5126	24.1933
1229.1	233.589	161.917	121.25	76.7313	44.5847	24.2395
1229.8	233.246	161.879	121.408	76.8443	44.6561	24.2855
1230.5	232.894	161.843	121.567	76.9565	44.7264	24.3309
1231.2	232.532	161.808	121.727	77.0681	44.796	24.3759
1231.9	232.157	161.773	121.888	77.1791	44.8649	24.4205
1232.5	231.773	161.737	122.049	77.2893	44.9331	24.4647
1233.2	231.384	161.7	122.209	77.3984	45.0003	24.5088
1233.8	230.994	161.661	122.368	77.5063	45.0667	24.5525
1234.5	230.604	161.623	122.526	77.6125	45.1318	24.5959
1235.2	230.218	161.582	122.682	77.717	45.1959	24.6389
1235.9	229.831	161.538	122.835	77.8201	45.259	24.6819
1236.6	229.45	161.49	122.984	77.9213	45.3211	24.7249
1237.3	229.076	161.437	123.129	78.0204	45.3822	24.7679
1238	228.71	161.379	123.27	78.1175	45.4422	24.811
1238.6	228.348	161.319	123.409	78.2128	45.501	24.8538
1239.3	227.991	161.256	123.544	78.3062	45.5588	24.8965
1240	227.636	161.191	123.677	78.398	45.6154	24.9391
1240.7	227.286	161.124	123.807	78.4879	45.6709	24.9814
1241.3	226.947	161.053	123.933	78.5754	45.7251	25.0236
1242	226.62	160.979	124.055	78.6605	45.7779	25.0657
1242.7	226.306	160.903	124.173	78.7432	45.8292	25.1074
1243.3	226.003	160.823	124.287	78.8235	45.8793	25.1491
1244	225.705	160.738	124.396	78.9019	45.9285	25.1911
1244.7	225.412	160.646	124.501	78.9785	45.9767	25.2334
1245.3	225.124	160.545	124.6	79.0533	46.0244	25.2763
1246	224.837	160.435	124.694	79.1264	46.0715	25.3199
1246.7	224.553	160.318	124.783	79.198	46.118	25.364
1247.4	224.267	160.19	124.866	79.2682	46.164	25.409
1248.1	223.977	160.052	124.945	79.3373	46.21	25.4549
1248.7	223.685	159.904	125.018	79.4051	46.2556	25.5018
1249.4	223.397	159.744	125.085	79.4711	46.3008	25.5497
1250	223.114	159.573	125.144	79.5353	46.3455	25.5985
1250.6	222.841	159.391	125.197	79.5973	46.3895	25.6482
1251.2	222.575	159.197	125.241	79.6574	46.433	25.699
1251.8	222.312	158.989	125.278	79.7158	46.4764	25.7511
1252.5	222.053	158.767	125.307	79.7724	46.5195	25.8045
1253.1	221.801	158.529	125.327	79.8272	46.5624	25.8595
1253.7	221.552	158.278	125.339	79.8802	46.605	25.9157
1254.4	221.309	158.018	125.346	79.9313	46.647	25.9727
1255	221.068	157.749	125.347	79.9807	46.6883	26.0303
1255.7	220.827	157.473	125.343	80.0285	46.7288	26.0884
1256.3	220.588	157.192	125.337	80.0746	46.7684	26.1468
1257	220.354	156.906	125.326	80.1188	46.807	26.2054
1257.6	220.123	156.618	125.312	80.161	46.8444	26.2639
1258.3	219.896	156.33	125.297	80.2012	46.8802	26.3219
1258.9	219.673	156.041	125.279	80.2395	46.9146	26.3796
1259.5	219.449	155.751	125.26	80.2761	46.9479	26.4373
1260.1	219.225	155.458	125.239	80.311	46.98	26.4948
1260.8	219.001	155.162	125.214	80.3443	47.0111	26.5524
1261.4	218.775	154.865	125.189	80.376	47.0409	26.6098
1262.1	218.547	154.571	125.164	80.4061	47.0692	26.6665
1262.8	218.316	154.281	125.14	80.4347	47.096	26.7223
1263.5	218.079	153.995	125.118	80.4618	47.1211	26.7773
1264.2	217.84	153.714	125.097	80.4873	47.1447	26.8315
1264.9	217.6	153.434	125.075	80.5111	47.1667	26.8852
1265.5	217.361	153.156	125.053	80.533	47.1871	26.9382
1266.2	217.125	152.881	125.03	80.5529	47.2059	26.9906
1266.9	216.893	152.606	125.005	80.5707	47.223	27.0425
1267.5	216.662	152.334	124.98	80.5866	47.2385	27.0938
1268.2	216.435	152.061	124.954	80.6004	47.2525	27.1448
1268.8	216.214	151.787	124.924	80.6121	47.265	27.1956
1269.4	215.996	151.515	124.894	80.6216	47.2758	27.2458
1270.1	215.782	151.248	124.864	80.629	47.2846	27.295
1270.7	215.57	150.988	124.835	80.6344	47.2913	27.343
1271.4	215.358	150.738	124.81	80.6377	47.2958	27.3895
1272.1	215.147	150.498	124.787	80.639	47.2978	27.4344
1272.7	214.942	150.264	124.766	80.6379	47.2977	27.478
1273.4	214.74	150.041	124.747	80.6346	47.2951	27.5201
1274	214.543	149.829	124.731	80.6289	47.29	27.5604
1274.6	214.35	149.626	124.717	80.6209	47.2825	27.5993
1275.2	214.157	149.429	124.704	80.611	47.273	27.6371
1275.8	213.966	149.237	124.693	80.599	47.2615	27.674
1276.4	213.774	149.046	124.68	80.5852	47.2486	27.7105
1277	213.582	148.857	124.666	80.5696	47.234	27.7466
1277.6	213.389	148.672	124.653	80.5522	47.2177	27.782
1278.2	213.193	148.487	124.64	80.5331	47.2	27.817
1278.8	212.991	148.303	124.626	80.5125	47.1809	27.8519
1279.4	212.786	148.118	124.612	80.4904	47.1606	27.8866
1280	212.58	147.933	124.595	80.4666	47.1389	27.9213
1280.7	212.371	147.746	124.578	80.441	47.1158	27.9558
1281.3	212.162	147.561	124.559	80.4136	47.0913	27.9901
1281.9	211.952	147.372	124.538	80.3845	47.0655	28.0245
1282.6	211.737	147.179	124.513	80.3539	47.0388	28.0595
1283.2	211.519	146.978	124.485	80.3218	47.0114	28.0952
1283.8	211.298	146.77	124.453	80.2882	46.9832	28.1317
1284.4	211.073	146.556	124.417	80.2531	46.9542	28.1689
1285	210.844	146.341	124.379	80.2164	46.9239	28.2061
1285.6	210.612	146.126	124.341	80.1781	46.8922	28.2431
1286.2	210.374	145.914	124.304	80.1382	46.859	28.2797
1286.8	210.132	145.704	124.267	80.0967	46.8241	28.3158
1287.4	209.885	145.498	124.23	80.0536	46.7877	28.3514
1288.1	209.635	145.297	124.195	80.0087	46.7493	28.3863
1288.7	209.382	145.105	124.163	79.9621	46.7087	28.4198
1289.4	209.124	144.92	124.133	79.9137	46.6663	28.4525
1290.1	208.859	144.737	124.104	79.8639	46.6223	28.4848
1290.8	208.588	144.555	124.074	79.8126	46.5768	28.5169
1291.4	208.31	144.371	124.044	79.7599	46.5303	28.5493
1292.1	208.024	144.187	124.013	79.706	46.4825	28.5817
1292.7	207.731	144.009	123.983	79.6505	46.433	28.6134
1293.3	207.43	143.833	123.955	79.5937	46.3819	28.6447
1293.9	207.12	143.66	123.928	79.5355	46.3294	28.6757
1294.5	206.802	143.49	123.902	79.476	46.2754	28.7063
1295.1	206.478	143.321	123.876	79.4151	46.2202	28.7366
1295.8	206.151	143.154	123.85	79.3528	46.1635	28.7666
1296.4	205.821	142.991	123.825	79.289	46.1055	28.7959
1297	205.489	142.83	123.8	79.2237	46.0462	28.8249
1297.6	205.154	142.669	123.774	79.1571	45.9858	28.8537
1298.3	204.818	142.507	123.746	79.0891	45.9244	28.8824
1298.9	204.482	142.344	123.717	79.0197	45.8623	28.9111
1299.5	204.147	142.179	123.686	78.9489	45.7993	28.9396
1300.1	203.812	142.017	123.655	78.8767	45.7352	28.9676
1300.7	203.477	141.857	123.624	78.8031	45.6699	28.995
1301.2	203.142	141.7	123.593	78.7281	45.6033	29.0218
1301.8	202.808	141.548	123.563	78.6517	45.5357	29.0478
1302.4	202.477	141.397	123.532	78.5739	45.467	29.0732
1302.9	202.151	141.249	123.501	78.4946	45.3973	29.0979
1303.5	201.83	141.106	123.471	78.4138	45.3264	29.1215
1304.1	201.514	140.966	123.44	78.3315	45.2545	29.1445
1304.7	201.199	140.827	123.408	78.2481	45.1819	29.1669
1305.2	200.888	140.688	123.376	78.1633	45.1085	29.189
1305.9	200.578	140.548	123.341	78.0774	45.0346	29.211
1306.5	200.269	140.406	123.305	77.9905	44.9602	29.2328
1307.1	199.963	140.264	123.268	77.9023	44.8852	29.2543
1307.7	199.657	140.122	123.229	77.8131	44.8097	29.2756
1308.3	199.35	139.977	123.189	77.723	44.7337	29.2968
1308.9	199.045	139.831	123.146	77.6318	44.6575	29.318
1309.4	198.743	139.683	123.102	77.5397	44.5809	29.3391
1310	198.446	139.532	123.055	77.4465	44.5042	29.36
1310.6	198.157	139.38	123.006	77.3522	44.4273	29.3806
1311.2	197.874	139.226	122.955	77.2569	44.3502	29.401
1311.7	197.595	139.067	122.9	77.1607	44.2733	29.4215
1312.3	197.323	138.904	122.842	77.0636	44.1964	29.4421
1312.9	197.057	138.736	122.78	76.9657	44.1199	29.4628
1313.6	196.797	138.563	122.715	76.8669	44.0434	29.4836
1314.2	196.543	138.39	122.648	76.7672	43.9669	29.504
1314.9	196.293	138.216	122.58	76.6666	43.8902	29.5241
1315.5	196.046	138.043	122.511	76.5651	43.8131	29.5437
1316.2	195.803	137.871	122.441	76.4628	43.7358	29.5627
1316.8	195.564	137.701	122.371	76.3596	43.6581	29.5812
1317.4	195.33	137.533	122.3	76.2555	43.58	29.5989
1318	195.1	137.371	122.231	76.1504	43.5012	29.6155
1318.6	194.873	137.212	122.163	76.0445	43.422	29.6313
1319.2	194.649	137.056	122.094	75.9379	43.3424	29.6463
1319.8	194.428	136.903	122.026	75.8304	43.2625	29.6606
1320.4	194.211	136.751	121.958	75.7223	43.1824	29.6744
1321	193.996	136.602	121.889	75.6135	43.102	29.6874
1321.6	193.782	136.458	121.823	75.504	43.0211	29.6994
1322.2	193.569	136.32	121.758	75.3938	42.9396	29.7105
1322.8	193.356	136.188	121.695	75.283	42.8576	29.7205
1323.4	193.145	136.061	121.634	75.1715	42.7752	29.7295
1324	192.938	135.937	121.573	75.0595	42.6925	29.7376
1324.6	192.735	135.818	121.513	74.9468	42.6096	29.7447
1325.2	192.539	135.703	121.454	74.8335	42.5267	29.7508
1325.7	192.35	135.591	121.395	74.7197	42.4437	29.756
1326.3	192.167	135.483	121.336	74.6054	42.3608	29.7603
1326.8	191.992	135.376	121.277	74.4906	42.2781	29.7637
1327.4	191.826	135.271	121.217	74.3753	42.1958	29.7663
1327.9	191.67	135.168	121.156	74.2596	42.1138	29.7681
1328.4	191.521	135.07	121.097	74.1435	42.0319	29.7687
1329	191.379	134.977	121.038	74.0269	41.95	29.7681
1329.5	191.242	134.891	120.982	73.9099	41.8679	29.7661
1330.1	191.112	134.811	120.928	73.7926	41.7858	29.7628
1330.6	190.991	134.737	120.874	73.6748	41.7039	29.7583
1331.2	190.879	134.668	120.822	73.5567	41.6221	29.7523
1331.8	190.776	134.606	120.771	73.4383	41.5404	29.745
1332.4	190.681	134.55	120.722	73.3196	41.4589	29.7363
1333	190.592	134.498	120.674	73.2006	41.3776	29.7266
1333.6	190.51	134.45	120.626	73.0814	41.2967	29.7159
1334.1	190.433	134.404	120.578	72.9621	41.2162	29.7045
1334.7	190.361	134.36	120.531	72.8427	41.1362	29.6924
1335.2	190.293	134.319	120.484	72.7232	41.0566	29.6795
1335.8	190.227	134.28	120.438	72.6036	40.9773	29.666
1336.3	190.162	134.244	120.392	72.484	40.8985	29.652
1336.9	190.099	134.208	120.346	72.3644	40.8201	29.6376
1337.4	190.04	134.173	120.3	72.2448	40.7425	29.6226
1338	189.983	134.139	120.253	72.1253	40.6655	29.6073
1338.6	189.932	134.106	120.207	72.0058	40.5892	29.5914
1339.2	189.883	134.072	120.159	71.8865	40.5138	29.5753
1339.8	189.836	134.036	120.11	71.7674	40.4392	29.5591
1340.4	189.79	133.999	120.06	71.6485	40.3655	29.5429
1341.1	189.746	133.958	120.009	71.5298	40.293	29.5269
1341.7	189.703	133.914	119.956	71.4114	40.2214	29.5109
1342.3	189.661	133.871	119.902	71.2933	40.1507	29.4947
1342.9	189.62	133.827	119.848	71.1755	40.0809	29.4783
1343.5	189.579	133.784	119.794	71.058	40.0119	29.4615
1344.1	189.539	133.742	119.741	70.9408	39.9437	29.4444
1344.6	189.499	133.7	119.688	70.8241	39.8764	29.427
1345.2	189.46	133.66	119.635	70.7077	39.8099	29.4092
1345.7	189.423	133.623	119.583	70.5917	39.7443	29.3908
1346.3	189.385	133.587	119.531	70.4762	39.6795	29.372
1346.9	189.346	133.551	119.48	70.3612	39.6158	29.3531
1347.4	189.305	133.514	119.429	70.2467	39.553	29.3342
1348	189.26	133.474	119.376	70.1329	39.4915	29.3155
1348.6	189.212	133.432	119.323	70.0197	39.4311	29.2971
1349.2	189.161	133.391	119.271	69.9071	39.3716	29.2786
1349.8	189.105	133.348	119.218	69.7952	39.3133	29.2601
1350.3	189.044	133.305	119.166	69.684	39.2561	29.2419
1350.9	188.979	133.26	119.113	69.5736	39.2	29.2238
1351.4	188.912	133.214	119.06	69.464	39.1453	29.2057
1351.9	188.844	133.167	119.008	69.3552	39.092	29.1876
1352.5	188.777	133.121	118.955	69.2472	39.0401	29.1692
1353	188.711	133.073	118.902	69.1402	38.9897	29.1507
1353.5	188.644	133.024	118.848	69.0341	38.9409	29.1322
1354	188.579	132.974	118.795	68.929	38.8938	29.1136
1354.5	188.516	132.922	118.74	68.8249	38.8485	29.0949
1355	188.456	132.869	118.685	68.7219	38.805	29.0762
1355.6	188.398	132.815	118.629	68.62	38.7633	29.0572
1356.1	188.342	132.76	118.574	68.5192	38.7234	29.0379
1356.7	188.286	132.706	118.519	68.4195	38.6852	29.0185
1357.2	188.233	132.652	118.464	68.3211	38.6489	28.9987
1357.9	188.185	132.598	118.409	68.2239	38.6146	28.9786
1358.7	188.142	132.544	118.354	68.1279	38.5824	28.958
1359.5	188.104	132.491	118.3	68.0333	38.5521	28.9368
1360.3	188.072	132.438	118.245	67.94	38.524	28.9151
1361.1	188.041	132.385	118.191	67.8482	38.498	28.8934
1361.9	188.012	132.33	118.136	67.7577	38.4742	28.8716
1362.7	187.983	132.272	118.081	67.6688	38.4527	28.8499
1363.5	187.955	132.211	118.024	67.5814	38.4335	28.8283
1364.3	187.927	132.148	117.968	67.4956	38.4165	28.8069
1365.1	187.897	132.083	117.911	67.4114	38.4019	28.7857
1365.9	187.864	132.013	117.853	67.3288	38.3896	28.7649
1366.8	187.83	131.94	117.794	67.2479	38.3797	28.7445
1367.5	187.796	131.864	117.734	67.1688	38.3724	28.7242
1368.3	187.763	131.785	117.674	67.0915	38.3677	28.7041
1369.1	187.734	131.704	117.613	67.016	38.3657	28.684
1369.8	187.706	131.62	117.552	66.9423	38.3665	28.664
1370.6	187.678	131.531	117.489	66.8706	38.37	28.6443
1371.4	187.651	131.439	117.425	66.8009	38.3764	28.625
1372.1	187.624	131.342	117.36	66.7332	38.3857	28.606
1372.9	187.598	131.241	117.294	66.6673	38.3977	28.5873
1373.7	187.573	131.138	117.228	66.6031	38.4121	28.5687
1374.4	187.549	131.033	117.161	66.5404	38.4286	28.5502
1375.1	187.524	130.926	117.094	66.4791	38.447	28.5319
1375.9	187.5	130.818	117.026	66.419	38.4672	28.5135
1376.6	187.478	130.708	116.959	66.3602	38.4891	28.4951
1377.3	187.457	130.599	116.891	66.3024	38.5126	28.4765
1378	187.439	130.49	116.824	66.2454	38.5372	28.4576
1378.8	187.422	130.382	116.758	66.1894	38.5631	28.4385
1379.5	187.405	130.274	116.691	66.1343	38.5902	28.4194
1380.3	187.389	130.165	116.625	66.08	38.6186	28.4002
1381.1	187.372	130.055	116.558	66.0268	38.6482	28.3811
1381.9	187.355	129.944	116.491	65.9743	38.6789	28.362
1382.7	187.338	129.835	116.425	65.9222	38.7101	28.3427
1383.4	187.32	129.727	116.359	65.8705	38.7417	28.3233
1384.2	187.301	129.62	116.294	65.8191	38.7735	28.3037
1385	187.281	129.514	116.229	65.7679	38.8057	28.284
1385.7	187.262	129.409	116.165	65.7173	38.8386	28.2642
1386.5	187.244	129.304	116.101	65.6672	38.872	28.2441
1387.2	187.229	129.201	116.038	65.6175	38.9061	28.2237
1388	187.215	129.099	115.975	65.5684	38.9408	28.2031
1388.8	187.203	128.999	115.912	65.5197	38.9761	28.1823
1389.6	187.193	128.898	115.849	65.4716	39.0122	28.1613
1390.3	187.186	128.798	115.787	65.4241	39.0491	28.1401
1391.2	187.181	128.7	115.725	65.3771	39.0866	28.1186
1392	187.179	128.603	115.663	65.3302	39.1242	28.0968
1392.9	187.179	128.51	115.603	65.2832	39.1616	28.0745
1393.8	187.181	128.419	115.543	65.2359	39.1984	28.0517
1394.7	187.186	128.333	115.484	65.1882	39.2346	28.0284
1395.7	187.194	128.249	115.427	65.1405	39.2706	28.0047
1396.7	187.205	128.169	115.37	65.0923	39.306	27.9803
1397.6	187.221	128.094	115.314	65.0437	39.3407	27.9553
1398.6	187.24	128.022	115.26	64.9948	39.3748	27.9297
1399.5	187.261	127.953	115.206	64.9456	39.4084	27.9038
1400.4	187.283	127.886	115.152	64.8964	39.4419	27.8776
1401.4	187.307	127.82	115.099	64.8474	39.4754	27.8512
1402.5	187.331	127.755	115.047	64.7985	39.509	27.8247
1403.6	187.356	127.692	114.995	64.7496	39.5422	27.7981
1404.6	187.381	127.63	114.943	64.7007	39.5753	27.7713
1405.8	187.404	127.569	114.892	64.652	39.6084	27.7447
1406.9	187.427	127.508	114.841	64.6035	39.6415	27.7181
1408	187.449	127.447	114.79	64.5551	39.6746	27.6915
1409.1	187.472	127.388	114.739	64.5069	39.7076	27.6648
1410.3	187.495	127.329	114.689	64.4588	39.7405	27.6381
1411.4	187.519	127.271	114.638	64.4108	39.7735	27.6114
1412.6	187.541	127.212	114.588	64.3633	39.8067	27.5849
1413.8	187.562	127.152	114.537	64.3163	39.8404	27.5588
1414.9	187.581	127.09	114.486	64.2699	39.8745	27.5329
1416	187.6	127.028	114.435	64.2238	39.9089	27.5072
1417	187.617	126.966	114.384	64.1777	39.9429	27.4817
1418	187.634	126.906	114.333	64.1313	39.9762	27.4561
1418.9	187.651	126.847	114.283	64.0845	40.0087	27.4305
1419.9	187.666	126.79	114.233	64.0372	40.04	27.4049
1420.8	187.682	126.735	114.184	63.9893	40.0704	27.3791
1421.7	187.698	126.682	114.135	63.9407	40.0992	27.3532
1422.6	187.714	126.634	114.088	63.8909	40.1263	27.327
1423.5	187.73	126.589	114.041	63.8402	40.1516	27.3006
1424.4	187.746	126.545	113.994	63.7887	40.1757	27.2741
1425.3	187.76	126.503	113.948	63.7367	40.1985	27.2478
1426.2	187.772	126.461	113.902	63.6843	40.2203	27.2216
1427.1	187.781	126.421	113.856	63.6312	40.241	27.1956
1428.1	187.79	126.383	113.811	63.5771	40.2597	27.1696
1429.1	187.797	126.347	113.767	63.522	40.2767	27.1435
1430.1	187.801	126.313	113.722	63.4659	40.2919	27.1176
1431.1	187.804	126.281	113.678	63.409	40.3054	27.0917
1432	187.806	126.25	113.635	63.3515	40.3178	27.0659
1432.9	187.806	126.221	113.592	63.2936	40.3291	27.0401
1433.9	187.807	126.194	113.55	63.2352	40.3393	27.0143
1434.8	187.808	126.168	113.508	63.1767	40.3486	26.9885
1435.7	187.807	126.143	113.466	63.1181	40.3574	26.9629
1436.6	187.807	126.119	113.425	63.0596	40.3658	26.9373
1437.6	187.806	126.095	113.384	63.0016	40.3744	26.912
1438.5	187.805	126.071	113.344	62.944	40.3828	26.8867
1439.5	187.805	126.048	113.304	62.8864	40.3907	26.8615
1440.6	187.804	126.026	113.264	62.8288	40.398	26.8363
1441.7	187.804	126.007	113.225	62.7711	40.4046	26.8111
1442.7	187.804	125.988	113.187	62.7135	40.4106	26.7859
1443.8	187.806	125.971	113.149	62.6564	40.4166	26.7607
1444.9	187.809	125.955	113.112	62.5997	40.4226	26.7354
1445.9	187.814	125.941	113.076	62.5434	40.4285	26.7101
1447	187.82	125.928	113.041	62.4877	40.4344	26.6847
1448.1	187.826	125.915	113.006	62.4323	40.4402	26.6594
1449.1	187.833	125.903	112.971	62.3775	40.446	26.6343
1450.2	187.84	125.891	112.937	62.3234	40.4519	26.6094
1451.3	187.846	125.879	112.903	62.2698	40.4579	26.5847
1452.5	187.852	125.867	112.87	62.2167	40.4638	26.5602
1453.5	187.858	125.854	112.837	62.1641	40.4696	26.5359
1454.5	187.862	125.842	112.804	62.1119	40.4752	26.512
1455.4	187.866	125.83	112.771	62.0603	40.4809	26.4883
1456.3	187.869	125.816	112.739	62.0098	40.487	26.4649
1457.2	187.873	125.803	112.707	61.9603	40.4938	26.4418
1458.1	187.878	125.788	112.676	61.9121	40.5016	26.4189
1458.9	187.884	125.773	112.645	61.8653	40.5103	26.3962
1459.8	187.889	125.756	112.614	61.8197	40.5198	26.374
1460.6	187.894	125.738	112.583	61.7757	40.5305	26.3521
1461.5	187.899	125.718	112.552	61.7332	40.5424	26.3307
1462.3	187.905	125.696	112.522	61.6922	40.5554	26.3096
1463.2	187.91	125.675	112.492	61.6522	40.5687	26.2888
1464	187.916	125.652	112.463	61.6129	40.5822	26.2682
1464.9	187.921	125.631	112.433	61.574	40.5953	26.2479
1465.8	187.927	125.609	112.405	61.5355	40.608	26.2278
1466.8	187.932	125.588	112.377	61.4976	40.6205	26.208
1467.7	187.938	125.568	112.349	61.46	40.6324	26.1883
1468.6	187.945	125.55	112.323	61.4223	40.6433	26.1687
1469.5	187.952	125.533	112.297	61.3846	40.6533	26.1492
1470.4	187.958	125.516	112.271	61.347	40.6623	26.13
1471.3	187.965	125.501	112.247	61.3096	40.6705	26.1109
1472.1	187.971	125.486	112.222	61.2723	40.6781	26.0922
1473	187.976	125.472	112.199	61.2351	40.6845	26.0737
1473.9	187.981	125.46	112.176	61.1973	40.6892	26.0554
1474.7	187.985	125.449	112.154	61.1589	40.692	26.0372
1475.6	187.989	125.441	112.132	61.1197	40.6928	26.0192
1476.5	187.992	125.434	112.111	61.08	40.6917	26.0014
1477.5	187.995	125.429	112.091	61.0403	40.6896	25.9838
1478.4	187.997	125.424	112.072	61.0007	40.6864	25.9665
1479.5	188.001	125.421	112.053	60.9613	40.6823	25.9494
1480.5	188.004	125.418	112.035	60.9222	40.6776	25.9325
1481.5	188.008	125.416	112.017	60.8834	40.6722	25.9158
1482.5	188.012	125.414	112	60.8453	40.6664	25.8995
1483.5	188.017	125.411	111.984	60.8082	40.6608	25.8835
1484.5	188.023	125.409	111.968	60.7718	40.6548	25.8679
1485.5	188.028	125.408	111.953	60.7355	40.6479	25.8524
1486.5	188.035	125.408	111.939	60.6993	40.6398	25.8372
1487.5	188.041	125.41	111.925	60.6628	40.63	25.8222
1488.6	188.047	125.413	111.913	60.626	40.6188	25.8073
1489.6	188.055	125.417	111.901	60.5897	40.6067	25.7927
1490.6	188.063	125.422	111.89	60.5534	40.5935	25.7784
1491.6	188.072	125.429	111.879	60.5172	40.5791	25.7642
1492.5	188.081	125.437	111.87	60.4812	40.5637	25.7502
1493.3	188.091	125.446	111.861	60.4453	40.5472	25.7365
1494.2	188.101	125.455	111.853	60.4096	40.5299	25.723
1495	188.111	125.465	111.845	60.3744	40.5123	25.7097
1495.8	188.121	125.476	111.838	60.3395	40.4941	25.6967
1496.6	188.132	125.487	111.832	60.3047	40.475	25.6839
1497.4	188.141	125.5	111.826	60.27	40.4552	25.6714
1498.2	188.151	125.513	111.821	60.2353	40.4346	25.659
1499	188.159	125.526	111.816	60.2009	40.4133	25.6469
1499.8	188.168	125.54	111.811	60.1669	40.3919	25.635
1500.6	188.177	125.554	111.807	60.1334	40.3703	25.6233
1501.4	188.185	125.568	111.803	60.1005	40.3486	25.6119
1502.2	188.194	125.582	111.8	60.0682	40.327	25.6006
1503	188.202	125.596	111.797	60.0366	40.3056	25.5897
1503.9	188.21	125.609	111.795	60.0057	40.2846	25.5789
1504.8	188.217	125.622	111.792	59.9758	40.2643	25.5685
1505.6	188.224	125.634	111.79	59.9467	40.2444	25.5582
1506.5	188.231	125.646	111.788	59.918	40.2246	25.5482
1507.3	188.237	125.659	111.787	59.8897	40.2045	25.5383
1508.1	188.243	125.672	111.786	59.8616	40.1841	25.5286
1508.9	188.249	125.686	111.785	59.8336	40.1632	25.519
1509.7	188.254	125.7	111.785	59.8059	40.1421	25.5097
1510.5	188.259	125.716	111.785	59.7784	40.1205	25.5004
1511.3	188.264	125.732	111.786	59.7508	40.0983	25.4913
1512.2	188.269	125.749	111.787	59.7234	40.0755	25.4822
1513	188.273	125.766	111.789	59.6961	40.0526	25.4733
1513.8	188.277	125.784	111.791	59.669	40.0296	25.4646
1514.7	188.279	125.802	111.793	59.6424	40.0068	25.4559
1515.6	188.281	125.82	111.795	59.6161	39.9842	25.4474
1516.5	188.282	125.839	111.797	59.5897	39.9612	25.4389
1517.4	188.283	125.859	111.8	59.5634	39.9381	25.4305
1518.4	188.282	125.879	111.803	59.5372	39.9147	25.4222
1519.3	188.281	125.9	111.807	59.511	39.8913	25.4139
1520.3	188.279	125.921	111.81	59.4852	39.868	25.4058
1521.2	188.277	125.942	111.814	59.4597	39.8449	25.3977
1522.1	188.275	125.963	111.818	59.4347	39.8219	25.3898
1523	188.272	125.985	111.822	59.4101	39.7991	25.382
1523.9	188.269	126.006	111.827	59.3862	39.7767	25.3743
1524.9	188.266	126.028	111.832	59.3629	39.7549	25.3668
1525.8	188.263	126.048	111.837	59.3405	39.7339	25.3594
1526.7	188.26	126.069	111.842	59.319	39.7135	25.3522
1527.7	188.257	126.089	111.848	59.298	39.6935	25.3451
1528.6	188.255	126.109	111.854	59.2776	39.6739	25.3381
1529.5	188.252	126.13	111.86	59.2577	39.6546	25.3312
1530.3	188.249	126.15	111.866	59.2384	39.6357	25.3244
1531.1	188.246	126.171	111.873	59.2199	39.6173	25.3178
1531.9	188.244	126.191	111.88	59.2021	39.5995	25.3113
1532.7	188.243	126.211	111.887	59.1851	39.5821	25.3049
1533.4	188.242	126.231	111.894	59.1689	39.5653	25.2987
1534.2	188.241	126.25	111.902	59.1534	39.5493	25.2925
1534.9	188.24	126.269	111.91	59.1388	39.5342	25.2864
1535.6	188.239	126.288	111.918	59.125	39.5201	25.2805
1536.4	188.239	126.306	111.926	59.1122	39.5072	25.2745
1537.1	188.238	126.324	111.934	59.1001	39.4952	25.2687
1537.8	188.237	126.341	111.942	59.0887	39.4843	25.2628
1538.6	188.235	126.358	111.95	59.0782	39.4746	25.257
1539.3	188.234	126.374	111.959	59.0685	39.4661	25.2512
1540.1	188.232	126.39	111.967	59.0597	39.4591	25.2455
1540.9	188.231	126.404	111.975	59.052	39.4534	25.2398
1541.7	188.23	126.418	111.983	59.0455	39.4491	25.2341
1542.5	188.23	126.431	111.991	59.0401	39.4464	25.2285
1543.3	188.229	126.443	112	59.0357	39.4453	25.223
1544.1	188.229	126.455	112.008	59.0326	39.446	25.2175
1544.9	188.229	126.464	112.016	59.0307	39.4486	25.212
1545.6	188.23	126.473	112.024	59.03	39.4528	25.2065
1546.4	188.23	126.482	112.031	59.0302	39.4582	25.2011
1547.1	188.231	126.489	112.039	59.0311	39.4647	25.1957
1547.9	188.231	126.497	112.047	59.0326	39.472	25.1904
1548.6	188.232	126.504	112.055	59.0347	39.4799	25.1851
1549.4	188.232	126.51	112.063	59.0373	39.4885	25.1799
1550.1	188.233	126.517	112.071	59.0404	39.4975	25.1748
1550.9	188.234	126.523	112.079	59.0438	39.5066	25.1698
1551.7	188.235	126.53	112.088	59.0474	39.5157	25.1648
1552.5	188.236	126.536	112.096	59.0514	39.5252	25.1599
1553.3	188.238	126.542	112.104	59.0556	39.5349	25.1551
1554.2	188.239	126.548	112.112	59.0602	39.5451	25.1504
1555.1	188.239	126.554	112.12	59.065	39.5554	25.1457
1556	188.24	126.561	112.129	59.0696	39.5654	25.1411
1556.9	188.241	126.567	112.137	59.0742	39.5749	25.1366
1557.8	188.241	126.574	112.145	59.0784	39.5838	25.1321
1558.7	188.241	126.581	112.153	59.0825	39.5923	25.1277
1559.6	188.241	126.589	112.162	59.0866	39.6007	25.1235
1560.4	188.241	126.596	112.17	59.0908	39.6088	25.1193
1561.3	188.241	126.604	112.178	59.095	39.6169	25.1152
1562.2	188.241	126.611	112.187	59.0993	39.6248	25.1111
1563.1	188.242	126.619	112.195	59.1037	39.6327	25.1072
1564	188.243	126.626	112.203	59.1083	39.6406	25.1034
1564.9	188.244	126.633	112.211	59.1132	39.6488	25.0996
1565.8	188.245	126.639	112.219	59.1182	39.6569	25.0959
1566.6	188.246	126.646	112.227	59.1231	39.6645	25.0923
1567.4	188.248	126.653	112.235	59.1277	39.6714	25.0888
1568.2	188.25	126.661	112.244	59.1318	39.6772	25.0855
1568.9	188.252	126.669	112.252	59.1355	39.682	25.0823
1569.7	188.254	126.678	112.26	59.1389	39.6861	25.0792
1570.4	188.256	126.686	112.268	59.1419	39.6891	25.0762
1571.1	188.259	126.696	112.276	59.1444	39.691	25.0734
1571.8	188.262	126.705	112.284	59.1466	39.6919	25.0707
1572.5	188.265	126.715	112.292	59.1483	39.6922	25.0681
1573.2	188.268	126.725	112.3	59.1499	39.6919	25.0655
1573.8	188.271	126.735	112.308	59.1514	39.6916	25.063
1574.5	188.275	126.745	112.316	59.1528	39.6912	25.0605
1575.2	188.279	126.755	112.323	59.1539	39.6903	25.0581
1575.9	188.283	126.764	112.33	59.1548	39.6892	25.0556
1576.6	188.287	126.774	112.337	59.1555	39.6882	25.0532
1577.3	188.292	126.784	112.344	59.1561	39.6872	25.0507
1578	188.296	126.793	112.35	59.1566	39.6862	25.0482
1578.7	188.301	126.803	112.356	59.157	39.6854	25.0457
1579.5	188.307	126.812	112.361	59.1573	39.6845	25.0432
1580.2	188.312	126.82	112.367	59.1576	39.6839	25.0407
1581	188.318	126.829	112.372	59.158	39.684	25.038
1581.9	188.325	126.836	112.376	59.1585	39.6847	25.0353
1582.8	188.331	126.843	112.38	59.1593	39.6863	25.0326
1583.7	188.339	126.85	112.383	59.1602	39.6886	25.0297
1584.5	188.346	126.856	112.386	59.1608	39.6909	25.0268
1585.4	188.354	126.862	112.389	59.1612	39.6932	25.0238
1586.3	188.362	126.868	112.391	59.1612	39.6952	25.0208
1587.1	188.37	126.874	112.393	59.1607	39.6967	25.0178
1587.9	188.379	126.88	112.394	59.1597	39.6979	25.0147
1588.7	188.388	126.886	112.396	59.1581	39.6984	25.0116
1589.6	188.398	126.893	112.396	59.1557	39.6979	25.0085
1590.4	188.407	126.9	112.397	59.1526	39.6966	25.0054
1591.2	188.418	126.906	112.396	59.149	39.6949	25.0022
1592	188.428	126.913	112.396	59.1449	39.693	24.999
1592.8	188.439	126.92	112.395	59.1404	39.6913	24.9956
1593.7	188.45	126.926	112.393	59.1355	39.6894	24.9922
1594.5	188.462	126.932	112.39	59.1298	39.6869	24.9886
1595.3	188.474	126.939	112.388	59.1234	39.6839	24.985
1596.2	188.486	126.945	112.384	59.1163	39.6805	24.9813
1597	188.498	126.952	112.38	59.1086	39.6767	24.9775
1598	188.511	126.958	112.376	59.1005	39.6726	24.9736
1599.1	188.524	126.965	112.371	59.0919	39.6683	24.9697
1600.5	188.538	126.971	112.366	59.083	39.6636	24.9658
1602.1	188.551	126.978	112.36	59.0738	39.6586	24.9619
1603.7	188.565	126.984	112.355	59.0643	39.6537	24.958
1605.2	188.579	126.99	112.349	59.0549	39.6488	24.9541
1606.6	188.593	126.995	112.343	59.0455	39.6443	24.9502
1608	188.607	127.001	112.336	59.0362	39.6399	24.9464
1609.4	188.622	127.006	112.33	59.0267	39.6352	24.9426
1610.8	188.636	127.011	112.323	59.0171	39.6304	24.9388
1612.1	188.651	127.017	112.316	59.0072	39.6252	24.9351
1613.4	188.665	127.022	112.309	58.9971	39.6196	24.9315
1614.7	188.68	127.027	112.303	58.9872	39.614	24.928
1616	188.695	127.032	112.296	58.9773	39.6081	24.9246
1617.3	188.709	127.037	112.289	58.9674	39.6019	24.9213
1618.5	188.723	127.043	112.283	58.9576	39.5955	24.9182
1619.9	188.738	127.048	112.276	58.9478	39.589	24.9152
1621.2	188.752	127.053	112.27	58.9382	39.5826	24.9123
1622.5	188.766	127.057	112.263	58.9287	39.5764	24.9094
1623.9	188.781	127.062	112.256	58.9195	39.5705	24.9066
1625.3	188.795	127.066	112.25	58.9104	39.5647	24.9039
1626.7	188.809	127.07	112.243	58.9014	39.5591	24.9012
1628.1	188.823	127.073	112.236	58.8925	39.5537	24.8986
1629.4	188.837	127.077	112.229	58.8838	39.5486	24.896
1630.6	188.851	127.08	112.222	58.8755	39.5438	24.8936
1631.9	188.865	127.083	112.216	58.8676	39.5395	24.8912
1633.1	188.878	127.085	112.209	58.8604	39.5356	24.8891
1634.3	188.891	127.088	112.203	58.8537	39.5321	24.8871
1635.4	188.904	127.089	112.197	58.8475	39.5292	24.8852
1636.6	188.916	127.091	112.192	58.8421	39.527	24.8834
1637.8	188.929	127.092	112.186	58.8374	39.5256	24.8819
1638.9	188.94	127.092	112.181	58.8333	39.5248	24.8804
1640.1	188.952	127.092	112.176	58.8297	39.5243	24.8791
1641.2	188.963	127.092	112.171	58.8265	39.5241	24.878
1642.4	188.974	127.092	112.166	58.8234	39.5238	24.8769
1643.6	188.985	127.092	112.161	58.8204	39.5235	24.876
1644.8	188.996	127.092	112.157	58.8177	39.5232	24.8753
1646	189.006	127.092	112.153	58.8152	39.5227	24.8747
1647.3	189.017	127.092	112.149	58.8125	39.5218	24.8742
1648.6	189.027	127.092	112.145	58.8099	39.5205	24.8739
1649.9	189.036	127.092	112.141	58.8073	39.519	24.8737
1651.2	189.046	127.092	112.137	58.8048	39.5174	24.8737
1652.4	189.055	127.092	112.134	58.8025	39.5157	24.8738
1653.7	189.064	127.092	112.131	58.8001	39.5138	24.874
1654.9	189.072	127.092	112.127	58.7976	39.5113	24.8744
1656.2	189.081	127.092	112.124	58.7948	39.5083	24.8748
1657.4	189.089	127.093	112.121	58.7916	39.5047	24.8754
1658.7	189.097	127.094	112.118	58.7883	39.5005	24.8761
1659.9	189.105	127.094	112.115	58.7851	39.496	24.8769
1661.2	189.112	127.095	112.113	58.7819	39.4912	24.878
1662.5	189.119	127.096	112.11	58.779	39.4862	24.8792
1663.8	189.125	127.098	112.109	58.7763	39.4809	24.8807
1665	189.131	127.099	112.107	58.7739	39.4754	24.8824
1666.3	189.136	127.1	112.107	58.772	39.47	24.8843
1667.4	189.141	127.101	112.106	58.7707	39.4646	24.8865
1668.6	189.145	127.102	112.107	58.7698	39.4592	24.889
1669.7	189.148	127.103	112.107	58.7692	39.4534	24.8917
1670.8	189.151	127.105	112.109	58.7688	39.4472	24.8947
1671.9	189.154	127.107	112.11	58.7684	39.4404	24.8978
1673	189.155	127.109	112.113	58.7681	39.433	24.9013
1674	189.157	127.111	112.115	58.7682	39.4253	24.905
1675.1	189.157	127.114	112.119	58.7685	39.4172	24.909
1676.2	189.157	127.117	112.123	58.7691	39.4085	24.9133
1677.2	189.156	127.12	112.127	58.7699	39.3993	24.9178
1678.3	189.155	127.123	112.132	58.7709	39.3898	24.9226
1679.4	189.153	127.126	112.138	58.772	39.38	24.9276
1680.5	189.151	127.13	112.143	58.7734	39.3702	24.9328
1681.6	189.148	127.133	112.15	58.775	39.3602	24.9381
1682.7	189.145	127.137	112.156	58.7766	39.35	24.9435
[truncated: 1,000 more rows]

## Sheet: Sheet2
0.056214	-0.00170749	0.00312487	0.000137282	-9.08523e-08	0	-5.40979e-09
0.14778	-0.00174343	0.00319364	0.000140383	-9.29272e-08	0	-5.53238e-09
0.29693	-0.00177987	0.00326339	0.00014353	-9.50325e-08	0	-5.65677e-09
0.53988	-0.00181685	0.0033342	0.000146725	-9.717e-08	0	-5.78305e-09
0.93563	-0.00185438	0.00340607	0.00014997	-9.93407e-08	0	-5.91129e-09
1.5803	-0.00189249	0.00347908	0.000153266	-1.01546e-07	0	-6.04156e-09
2.6303	-0.00193117	0.00355319	0.000156612	-1.03786e-07	0	-6.17386e-09
4.3407	-0.00197039	0.00362838	0.000160008	-1.06058e-07	0	-6.30809e-09
7.0471	-0.00201017	0.00370466	0.000163455	-1.08365e-07	-6.45774e-16	-6.44432e-09
10.057	-0.00205053	0.00378207	0.000166952	-1.10706e-07	-2.43555e-15	-6.58259e-09
13.067	-0.00209149	0.00386043	0.00017049	-1.13134e-07	-5.35705e-15	-6.72045e-09
16.077	-0.00213309	0.00393953	0.000174052	-1.15726e-07	-9.74406e-15	-6.85445e-09
19.087	-0.00217536	0.00401922	0.000177627	-1.18525e-07	-1.53982e-14	-6.98247e-09
22.097	-0.00221831	0.00409927	0.000181202	-1.21601e-07	-2.218e-14	-7.10135e-09
25.106	-0.00226197	0.00417961	0.000184769	-1.24985e-07	-3.06065e-14	-7.20967e-09
28.116	-0.00230638	0.00426025	0.000188328	-1.28688e-07	-4.08661e-14	-7.30703e-09
31.126	-0.00235156	0.00434096	0.000191864	-1.32786e-07	-5.25028e-14	-7.39002e-09
34.136	-0.00239756	0.00442154	0.000195362	-1.37348e-07	-6.53393e-14	-7.45542e-09
37.146	-0.00244438	0.00450198	0.000198821	-1.42378e-07	-7.94999e-14	-7.50305e-09
40.156	-0.00249201	0.00458225	0.00020224	-1.47878e-07	-9.48453e-14	-7.5328e-09
43.166	-0.00254047	0.00466229	0.000205615	-1.53867e-07	-1.11946e-13	-7.54374e-09
46.176	-0.00258975	0.00474212	0.000208945	-1.60343e-07	-1.31241e-13	-7.53599e-09
49.186	-0.00263989	0.00482151	0.000212217	-1.6738e-07	-1.52459e-13	-7.5062e-09
52.195	-0.00269095	0.00490014	0.000215406	-1.75083e-07	-1.75726e-13	-7.44951e-09
55.205	-0.00274294	0.00497793	0.000218508	-1.83478e-07	-2.006e-13	-7.36466e-09
58.215	-0.00279587	0.00505473	0.000221511	-1.92613e-07	-2.26641e-13	-7.24949e-09
61.225	-0.00284977	0.00513055	0.000224416	-2.02491e-07	-2.54104e-13	-7.10392e-09
64.235	-0.00290463	0.00520557	0.000227235	-2.13069e-07	-2.82862e-13	-6.93003e-09
67.245	-0.00296048	0.00527974	0.000229964	-2.24373e-07	-3.13036e-13	-6.72674e-09
70.255	-0.00301733	0.00535307	0.000232602	-2.36412e-07	-3.448e-13	-6.49376e-09
73.265	-0.00307519	0.00542553	0.000235148	-2.49194e-07	-3.7785e-13	-6.2307e-09
76.275	-0.00313409	0.00549702	0.000237594	-2.62754e-07	-4.12094e-13	-5.93596e-09
79.285	-0.00319402	0.00556762	0.000239945	-2.77076e-07	-4.48249e-13	-5.61033e-09
82.294	-0.00325499	0.00563741	0.000242206	-2.92144e-07	-4.86748e-13	-5.25474e-09
85.304	-0.00331704	0.00570612	0.000244359	-3.08041e-07	-5.27538e-13	-4.86523e-09
88.314	-0.00338023	0.00577342	0.00024638	-3.24876e-07	-5.70929e-13	-4.43681e-09
91.324	-0.00344458	0.00583913	0.000248257	-3.42709e-07	-6.16487e-13	-3.96678e-09
94.136	-0.00351013	0.00590296	0.000249969	-3.61633e-07	-6.6389e-13	-3.45072e-09
96.808	-0.00357691	0.00596489	0.000251514	-3.81659e-07	-7.13626e-13	-2.88829e-09
99.363	-0.00364492	0.00602509	0.000252904	-4.0275e-07	-7.65753e-13	-2.28131e-09
101.85	-0.00371419	0.00608333	0.000254121	-4.24981e-07	-8.19652e-13	-1.62628e-09
104.37	-0.00378476	0.00613944	0.000255155	-4.4841e-07	-8.75012e-13	-9.20611e-10
106.85	-0.00385662	0.00619351	0.000256011	-4.73008e-07	-9.31776e-13	-1.65608e-10
109.3	-0.00392975	0.00624561	0.000256694	-4.98754e-07	-9.89623e-13	6.37707e-10
111.72	-0.00400414	0.00629581	0.000257209	-5.25621e-07	-1.04901e-12	1.48815e-09
114.11	-0.00407977	0.00634431	0.00025757	-5.5355e-07	-1.11024e-12	2.38294e-09
116.47	-0.00415665	0.00639099	0.000257769	-5.82582e-07	-1.17283e-12	3.324e-09
118.8	-0.00423483	0.00643562	0.000257788	-6.1279e-07	-1.23672e-12	4.31464e-09
121.1	-0.00431429	0.0064783	0.000257636	-6.44143e-07	-1.30221e-12	5.35344e-09
123.38	-0.00439502	0.00651905	0.000257313	-6.7663e-07	-1.36936e-12	6.43996e-09
125.64	-0.00447704	0.00655781	0.000256816	-7.10278e-07	-1.43821e-12	7.57534e-09
127.86	-0.00456037	0.00659461	0.000256145	-7.45092e-07	-1.50892e-12	8.75975e-09
130.06	-0.00464503	0.00662935	0.000255293	-7.81102e-07	-1.58108e-12	9.99451e-09
132.24	-0.00473106	0.00666193	0.000254253	-8.18353e-07	-1.65441e-12	1.12816e-08
134.39	-0.00481844	0.00669245	0.000253031	-8.56814e-07	-1.72913e-12	1.26196e-08
136.53	-0.00490714	0.00672103	0.000251637	-8.96438e-07	-1.80516e-12	1.40064e-08
138.64	-0.00499717	0.00674768	0.00025007	-9.3723e-07	-1.88321e-12	1.54422e-08
140.73	-0.00508853	0.00677246	0.000248334	-9.79179e-07	-1.96386e-12	1.69263e-08
142.81	-0.00518128	0.00679511	0.000246411	-1.02237e-06	-2.04697e-12	1.84626e-08
144.88	-0.00527547	0.00681521	0.000244272	-1.06693e-06	-2.1328e-12	2.00575e-08
146.88	-0.00537115	0.00683262	0.000241906	-1.11293e-06	-2.22121e-12	2.17133e-08
148.85	-0.00546834	0.00684706	0.000239295	-1.16044e-06	-2.312e-12	2.3434e-08
150.77	-0.00556709	0.00685842	0.000236427	-1.20951e-06	-2.40569e-12	2.52218e-08
152.67	-0.00566741	0.00686668	0.000233304	-1.26016e-06	-2.50247e-12	2.70768e-08
154.49	-0.00576935	0.00687154	0.000229904	-1.31248e-06	-2.60164e-12	2.9004e-08
156.33	-0.00587298	0.00687268	0.000226203	-1.36658e-06	-2.70285e-12	3.10082e-08
158.17	-0.00597827	0.00687022	0.000222209	-1.42244e-06	-2.80622e-12	3.30877e-08
160	-0.00608521	0.0068643	0.000217934	-1.47998e-06	-2.91149e-12	3.52403e-08
161.78	-0.00619379	0.00685494	0.000213378	-1.53923e-06	-3.01928e-12	3.74658e-08
163.54	-0.00630399	0.00684231	0.000208552	-1.60011e-06	-3.13004e-12	3.9762e-08
165.35	-0.00641585	0.00682615	0.000203439	-1.66273e-06	-3.24334e-12	4.21325e-08
167.13	-0.00652947	0.00680603	0.000198008	-1.72722e-06	-3.35922e-12	4.45842e-08
168.91	-0.00664483	0.00678197	0.00019226	-1.79358e-06	-3.47718e-12	4.71166e-08
170.66	-0.00676194	0.00675393	0.000186192	-1.86182e-06	-3.59666e-12	4.97307e-08
172.39	-0.00688082	0.00672195	0.000179807	-1.93194e-06	-3.71787e-12	5.24259e-08
174.13	-0.00700144	0.00668635	0.000173125	-2.00385e-06	-3.8406e-12	5.51982e-08
175.86	-0.00712382	0.0066471	0.000166145	-2.07757e-06	-3.96486e-12	5.80482e-08
177.58	-0.00724798	0.00660424	0.000158868	-2.15309e-06	-4.0907e-12	6.09757e-08
179.28	-0.00737391	0.00655792	0.000151305	-2.23038e-06	-4.21775e-12	6.39788e-08
180.91	-0.00750159	0.00650818	0.000143458	-2.30942e-06	-4.34579e-12	6.70569e-08
182.58	-0.00763103	0.00645524	0.000135341	-2.39016e-06	-4.47552e-12	7.02073e-08
184.24	-0.0077622	0.00639932	0.00012697	-2.47252e-06	-4.60733e-12	7.34268e-08
185.89	-0.00789513	0.00634025	0.000118332	-2.55659e-06	-4.74105e-12	7.67185e-08
187.53	-0.0080299	0.0062777	0.000109405	-2.64245e-06	-4.8769e-12	8.0087e-08
189.16	-0.0081665	0.00621164	0.000100185	-2.73013e-06	-5.01432e-12	8.35333e-08
190.78	-0.00830498	0.00614187	9.0658e-05	-2.81969e-06	-5.15285e-12	8.70603e-08
192.39	-0.00844534	0.00606853	8.08338e-05	-2.91111e-06	-5.29292e-12	9.06663e-08
193.99	-0.00858754	0.00599198	7.07365e-05	-3.00427e-06	-5.43448e-12	9.43465e-08
195.58	-0.00873162	0.00591212	6.03579e-05	-3.09922e-06	-5.57773e-12	9.81028e-08
197.16	-0.00887759	0.00582891	4.96956e-05	-3.19598e-06	-5.72295e-12	1.01936e-07
198.62	-0.00902547	0.00574237	3.87498e-05	-3.29454e-06	-5.86996e-12	1.05846e-07
200.07	-0.00917526	0.00565232	2.75096e-05	-3.39496e-06	-6.0188e-12	1.09835e-07
201.53	-0.00932697	0.00555883	1.5978e-05	-3.49723e-06	-6.16955e-12	1.13902e-07
202.99	-0.0094806	0.00546194	4.15864e-06	-3.60132e-06	-6.32219e-12	1.18047e-07
204.48	-0.00963617	0.00536154	-7.95723e-06	-3.70729e-06	-6.47686e-12	1.22272e-07
205.98	-0.00979371	0.00525751	-2.03772e-05	-3.81517e-06	-6.63366e-12	1.26578e-07
207.48	-0.00995323	0.00514979	-3.31069e-05	-3.92499e-06	-6.79208e-12	1.30967e-07
208.98	-0.0101148	0.00503824	-4.61557e-05	-4.03679e-06	-6.9518e-12	1.35441e-07
210.48	-0.0102783	0.00492302	-5.95128e-05	-4.15053e-06	-7.11292e-12	1.39997e-07
211.94	-0.0104438	0.00480441	-7.31596e-05	-4.26613e-06	-7.27524e-12	1.44633e-07
213.39	-0.0106113	0.00468248	-8.70927e-05	-4.38359e-06	-7.43905e-12	1.49347e-07
214.82	-0.0107808	0.00455737	-0.000101302	-4.50287e-06	-7.60459e-12	1.54138e-07
216.23	-0.0109523	0.00442908	-0.000115789	-4.62398e-06	-7.77154e-12	1.59005e-07
217.63	-0.0111259	0.00429744	-0.000130563	-4.74695e-06	-7.93985e-12	1.63952e-07
218.96	-0.0113014	0.00416262	-0.000145616	-4.87176e-06	-8.11035e-12	1.68977e-07
220.29	-0.011479	0.00402472	-0.000160939	-4.99838e-06	-8.28353e-12	1.74077e-07
221.6	-0.0116586	0.00388343	-0.000176555	-5.12691e-06	-8.45945e-12	1.79258e-07
222.9	-0.0118404	0.00373838	-0.000192491	-5.25747e-06	-8.63851e-12	1.84525e-07
224.21	-0.0120243	0.00358929	-0.000208764	-5.39015e-06	-8.82031e-12	1.89883e-07
225.53	-0.0122105	0.00343575	-0.000225406	-5.52509e-06	-9.00455e-12	1.95338e-07
226.85	-0.0123989	0.00327771	-0.000242418	-5.66231e-06	-9.19187e-12	2.0089e-07
228.19	-0.0125896	0.0031153	-0.000259793	-5.80176e-06	-9.38243e-12	2.06538e-07
229.53	-0.0127826	0.00294816	-0.000277557	-5.94359e-06	-9.57579e-12	2.12287e-07
230.88	-0.012978	0.00277598	-0.00029573	-6.08788e-06	-9.77182e-12	2.18143e-07
232.21	-0.0131758	0.00259878	-0.000314313	-6.23464e-06	-9.97055e-12	2.24105e-07
233.51	-0.0133759	0.00241652	-0.000333308	-6.38388e-06	-1.01718e-11	2.30174e-07
234.78	-0.0135785	0.00222917	-0.000352718	-6.53562e-06	-1.03763e-11	2.36351e-07
236.04	-0.0137835	0.00203683	-0.000372535	-6.68983e-06	-1.05843e-11	2.42634e-07
237.32	-0.0139909	0.00183913	-0.000392787	-6.84663e-06	-1.07956e-11	2.49028e-07
238.65	-0.0142009	0.00163559	-0.000413506	-7.00618e-06	-1.10103e-11	2.55542e-07
239.98	-0.0144135	0.0014261	-0.000434701	-7.16851e-06	-1.12278e-11	2.62176e-07
241.31	-0.0146286	0.00121045	-0.000456387	-7.33371e-06	-1.14475e-11	2.68934e-07
242.64	-0.0148464	0.00098878	-0.000478554	-7.50172e-06	-1.16695e-11	2.75815e-07
243.97	-0.0150667	0.000761518	-0.000501173	-7.67243e-06	-1.18937e-11	2.82812e-07
245.3	-0.0152896	0.000528665	-0.000524245	-7.84585e-06	-1.21202e-11	2.89925e-07
246.65	-0.015515	0.000290359	-0.000547762	-8.02195e-06	-1.23492e-11	2.97154e-07
248.01	-0.0157431	4.66535e-05	-0.000571719	-8.2007e-06	-1.25804e-11	3.04498e-07
249.38	-0.0159737	-0.000202577	-0.000596126	-8.38217e-06	-1.28134e-11	3.11958e-07
250.74	-0.016207	-0.000457068	-0.000620965	-8.56627e-06	-1.30492e-11	3.19531e-07
252.08	-0.0164428	-0.000716544	-0.000646218	-8.75293e-06	-1.32883e-11	3.27214e-07
253.4	-0.0166812	-0.000981382	-0.00067191	-8.94228e-06	-1.35304e-11	3.35011e-07
254.69	-0.0169224	-0.00125206	-0.000698077	-9.13445e-06	-1.37761e-11	3.42931e-07
255.95	-0.0171663	-0.0015288	-0.000724732	-9.32954e-06	-1.40246e-11	3.50977e-07
257.19	-0.017413	-0.00181202	-0.000751907	-9.52768e-06	-1.42755e-11	3.59155e-07
258.43	-0.0176625	-0.0021016	-0.000779591	-9.72882e-06	-1.45294e-11	3.67463e-07
259.67	-0.0179148	-0.00239708	-0.000807757	-9.93286e-06	-1.47862e-11	3.75895e-07
260.9	-0.01817	-0.00269876	-0.000836423	-1.01399e-05	4.01204e-11	3.84456e-07
262.13	-0.0184279	-0.00300679	-0.0008656	-1.03499e-05	1.92752e-10	3.93149e-07
263.37	-0.0186878	-0.00332063	-0.000895184	-1.05614e-05	4.42061e-10	4.02617e-07
264.62	-0.0189481	-0.00363973	-0.000925037	-1.07719e-05	8.16561e-10	4.13792e-07
265.82	-0.0192081	-0.0039636	-0.000955065	-1.098e-05	1.29931e-09	4.27229e-07
266.98	-0.0194664	-0.00429144	-0.000985126	-1.11836e-05	1.87837e-09	4.4376e-07
268.13	-0.0197225	-0.00462321	-0.00101517	-1.13818e-05	2.59795e-09	4.63777e-07
269.28	-0.0199762	-0.00495907	-0.00104521	-1.15743e-05	3.47411e-09	4.87407e-07
270.44	-0.0202263	-0.00529839	-0.00107509	-1.17588e-05	4.46791e-09	5.15562e-07
271.59	-0.0204713	-0.00564067	-0.00110469	-1.19332e-05	5.56421e-09	5.49104e-07
272.75	-0.0207113	-0.00598581	-0.001134	-1.20974e-05	6.77361e-09	5.88083e-07
273.92	-0.0209461	-0.00633358	-0.001163	-1.22512e-05	8.08423e-09	6.32511e-07
275.1	-0.0211754	-0.00668383	-0.00119165	-1.23941e-05	9.54481e-09	6.82641e-07
276.29	-0.0213994	-0.00703659	-0.00121996	-1.25261e-05	1.11928e-08	7.3844e-07
277.46	-0.0216166	-0.00739118	-0.0012478	-1.26449e-05	1.30051e-08	8.00804e-07
278.63	-0.021825	-0.00774673	-0.00127495	-1.27473e-05	1.49924e-08	8.71026e-07
279.8	-0.0220242	-0.0081029	-0.00130136	-1.28325e-05	1.7117e-08	9.49437e-07
280.96	-0.0222134	-0.00845921	-0.00132694	-1.28989e-05	1.93413e-08	1.03661e-06
282.11	-0.0223924	-0.00881585	-0.0013517	-1.29466e-05	2.16871e-08	1.13258e-06
283.24	-0.0225622	-0.00917355	-0.00137575	-1.2977e-05	2.41434e-08	1.23682e-06
284.36	-0.0227223	-0.00953224	-0.00139904	-1.29894e-05	2.67207e-08	1.34964e-06
285.48	-0.0228727	-0.00989215	-0.00142159	-1.29837e-05	2.94339e-08	1.47112e-06
286.59	-0.0230132	-0.0102532	-0.00144338	-1.29596e-05	3.22569e-08	1.60139e-06
287.7	-0.0231431	-0.0106151	-0.00146434	-1.2916e-05	3.51819e-08	1.74085e-06
288.8	-0.0232629	-0.0109781	-0.00148452	-1.28535e-05	3.82702e-08	1.88932e-06
289.91	-0.0233729	-0.0113426	-0.00150397	-1.27728e-05	4.15588e-08	2.04657e-06
291.01	-0.0234715	-0.0117079	-0.00152252	-1.26712e-05	4.50429e-08	2.21364e-06
292.13	-0.0235567	-0.012073	-0.00153996	-1.25454e-05	4.87494e-08	2.39187e-06
293.25	-0.0236274	-0.0124372	-0.00155618	-1.23934e-05	5.26409e-08	2.58198e-06
294.38	-0.0236818	-0.0127997	-0.00157098	-1.22123e-05	5.669e-08	2.78512e-06
295.53	-0.0237199	-0.0131605	-0.00158438	-1.2002e-05	6.09385e-08	3.00142e-06
296.66	-0.0237423	-0.0135204	-0.00159645	-1.17637e-05	6.53911e-08	3.23041e-06
297.79	-0.0237477	-0.0138787	-0.00160706	-1.1495e-05	6.99952e-08	3.47301e-06
298.91	-0.023735	-0.0142349	-0.00161611	-1.11942e-05	7.4724e-08	3.72994e-06
300.03	-0.0237048	-0.0145893	-0.00162364	-1.08622e-05	7.95729e-08	4.00083e-06
301.13	-0.0236575	-0.014942	-0.00162969	-1.04998e-05	8.45141e-08	4.28542e-06
302.23	-0.0235937	-0.0152932	-0.00163433	-1.01075e-05	8.95874e-08	4.5834e-06
303.32	-0.0235143	-0.0156435	-0.00163765	-9.68752e-06	9.48176e-08	4.89402e-06
304.41	-0.0234187	-0.0159925	-0.00163959	-9.23837e-06	1.00164e-07	5.21781e-06
305.49	-0.0233056	-0.0163396	-0.00164001	-8.75787e-06	1.05621e-07	5.55564e-06
306.57	-0.0231756	-0.016685	-0.00163895	-8.24699e-06	1.11215e-07	5.90712e-06
307.64	-0.0230287	-0.0170287	-0.00163645	-7.70599e-06	1.16951e-07	6.27215e-06
308.72	-0.0228646	-0.0173706	-0.00163244	-7.13414e-06	1.22833e-07	6.65104e-06
309.79	-0.0226833	-0.0177109	-0.00162696	-6.53138e-06	1.28873e-07	7.04385e-06
310.87	-0.0224842	-0.0180494	-0.00161994	-5.89683e-06	1.35037e-07	7.45094e-06
311.96	-0.0222665	-0.018386	-0.00161131	-5.22917e-06	1.41301e-07	7.87285e-06
313.04	-0.0220309	-0.0187208	-0.00160113	-4.52938e-06	1.47683e-07	8.30921e-06
314.13	-0.0217781	-0.0190542	-0.00158949	-3.7989e-06	1.54178e-07	8.75942e-06
315.23	-0.0215082	-0.0193863	-0.00157637	-3.03757e-06	1.60845e-07	9.22358e-06
316.33	-0.0212214	-0.0197171	-0.00156182	-2.24586e-06	1.67735e-07	9.70152e-06
317.43	-0.0209162	-0.0200461	-0.00154568	-1.42122e-06	1.74833e-07	1.01942e-05
318.54	-0.02059	-0.020372	-0.00152768	-5.5933e-07	1.82166e-07	1.07035e-05
319.66	-0.0202419	-0.0206944	-0.00150773	3.41385e-07	1.89718e-07	1.12298e-05
320.78	-0.0198702	-0.0210126	-0.00148565	1.28363e-06	1.97473e-07	1.17744e-05
321.87	-0.0194741	-0.0213261	-0.00146137	2.26886e-06	2.05477e-07	1.23377e-05
322.94	-0.0190535	-0.0216352	-0.00143489	3.29713e-06	2.13743e-07	1.29198e-05
324	-0.0186065	-0.0219389	-0.001406	4.37176e-06	2.22215e-07	1.35221e-05
325.05	-0.0181311	-0.0222363	-0.00137451	5.49598e-06	2.3086e-07	1.41459e-05
326.09	-0.017628	-0.0225278	-0.00134049	6.6687e-06	2.3969e-07	1.47906e-05
327.12	-0.0170982	-0.0228138	-0.00130404	7.88833e-06	2.48683e-07	1.54557e-05
328.15	-0.0165416	-0.0230943	-0.00126514	9.15481e-06	2.5789e-07	1.61412e-05
329.18	-0.0159594	-0.0233698	-0.00122392	1.04665e-05	2.67352e-07	1.68464e-05
330.21	-0.0153499	-0.0236395	-0.00118021	1.18261e-05	2.7703e-07	1.75725e-05
331.25	-0.0147104	-0.0239023	-0.00113373	1.32381e-05	2.86929e-07	1.8321e-05
332.28	-0.0140411	-0.0241583	-0.00108451	1.4702e-05	2.97005e-07	1.9092e-05
333.31	-0.0133417	-0.0244072	-0.0010325	1.62187e-05	3.07212e-07	1.98857e-05
334.34	-0.0126124	-0.0246494	-0.000977741	1.77876e-05	3.17566e-07	2.0702e-05
335.37	-0.0118548	-0.024886	-0.000920417	1.9406e-05	3.2805e-07	2.15398e-05
336.4	-0.0110688	-0.0251169	-0.000860519	2.10744e-05	3.38664e-07	2.23994e-05
337.43	-0.0102544	-0.0253426	-0.000798071	2.27924e-05	3.49414e-07	2.32806e-05
338.45	-0.00941237	-0.0255635	-0.000733155	2.45588e-05	3.60267e-07	2.41829e-05
339.46	-0.00854311	-0.0257797	-0.000665806	2.63732e-05	3.71204e-07	2.51063e-05
340.45	-0.00764764	-0.0259919	-0.000596144	2.82337e-05	3.82287e-07	2.60501e-05
341.44	-0.0067273	-0.0262011	-0.000524324	3.01381e-05	3.93546e-07	2.70133e-05
342.43	-0.0057809	-0.0264067	-0.00045022	3.20884e-05	4.04969e-07	2.79968e-05
343.4	-0.00480651	-0.0266079	-0.00037364	3.40878e-05	4.16573e-07	2.90019e-05
344.38	-0.0038038	-0.0268045	-0.00029455	3.61369e-05	4.28312e-07	3.00288e-05
345.36	-0.00277157	-0.026996	-0.000212827	3.82378e-05	4.40146e-07	3.10784e-05
346.35	-0.00171057	-0.0271829	-0.000128562	4.0389e-05	4.52111e-07	3.21501e-05
347.33	-0.000622756	-0.0273666	-4.19755e-05	4.25875e-05	4.64204e-07	3.32427e-05
348.33	0.000492591	-0.0275468	4.70023e-05	4.48344e-05	4.7644e-07	3.43567e-05
349.34	0.00163575	-0.0277235	0.000138391	4.71301e-05	4.88845e-07	3.54924e-05
350.37	0.00280671	-0.0278967	0.000232189	4.94746e-05	5.01404e-07	3.66497e-05
351.4	0.00400636	-0.0280659	0.000328497	5.18696e-05	5.14118e-07	3.78292e-05
352.41	0.00523447	-0.0282313	0.000427287	5.43145e-05	5.26995e-07	3.90308e-05
353.43	0.00649072	-0.028393	0.000528526	5.6809e-05	5.40034e-07	4.02543e-05
354.43	0.00777589	-0.0285508	0.000632292	5.93542e-05	5.53247e-07	4.15003e-05
355.43	0.00909068	-0.0287043	0.000738652	6.19514e-05	5.66641e-07	4.27691e-05
356.42	0.0104356	-0.0288534	0.000847656	6.46014e-05	5.80174e-07	4.40612e-05
357.41	0.0118113	-0.0289975	0.00095939	6.73055e-05	5.93817e-07	4.53771e-05
358.4	0.0132171	-0.0291375	0.00107375	7.00624e-05	6.07581e-07	4.67162e-05
359.39	0.0146514	-0.0292742	0.00119057	7.28694e-05	6.21446e-07	4.80776e-05
360.37	0.0161141	-0.0294079	0.00130981	7.57263e-05	6.3544e-07	4.94612e-05
361.36	0.0176042	-0.0295395	0.00143138	7.86317e-05	6.49581e-07	5.08665e-05
362.35	0.019122	-0.0296687	0.00155529	8.15858e-05	6.63842e-07	5.22936e-05
363.34	0.0206683	-0.0297951	0.00168162	8.45901e-05	6.7822e-07	5.37431e-05
364.34	0.0222423	-0.0299193	0.0018103	8.76433e-05	6.92784e-07	5.52146e-05
365.35	0.0238435	-0.0300417	0.00194126	9.07445e-05	7.07578e-07	5.67076e-05
366.38	0.0254737	-0.0301613	0.00207468	9.38968e-05	7.22605e-07	5.82234e-05
367.41	0.0271353	-0.0302771	0.00221081	9.71042e-05	7.37902e-07	5.97635e-05
368.45	0.0288298	-0.0303883	0.00234982	0.000100369	7.53431e-07	6.13291e-05
369.49	0.0305598	-0.0304936	0.00249198	0.000103696	7.69169e-07	6.29218e-05
370.53	0.0323257	-0.0305929	0.00263731	0.000107086	7.85171e-07	6.45417e-05
371.54	0.0341268	-0.0306868	0.00278573	0.000110536	8.0145e-07	6.61886e-05
372.52	0.0359653	-0.0307741	0.00293748	0.000114052	8.17967e-07	6.78639e-05
373.49	0.037843	-0.0308541	0.00309274	0.000117637	8.34712e-07	6.95689e-05
374.44	0.03976	-0.0309269	0.00325151	0.000121289	8.51688e-07	7.13035e-05
375.38	0.0417165	-0.0309922	0.00341382	0.000125011	8.68882e-07	7.30679e-05
376.33	0.0437127	-0.03105	0.00357968	0.000128801	8.86346e-07	7.48623e-05
377.26	0.0457482	-0.0311008	0.00374904	0.000132659	9.04115e-07	7.66864e-05
378.19	0.047825	-0.0311435	0.00392213	0.00013659	9.22166e-07	7.85417e-05
379.12	0.0499462	-0.0311765	0.00409925	0.000140597	9.4051e-07	8.043e-05
380.05	0.0521125	-0.0311997	0.00428047	0.000144682	9.59089e-07	8.23519e-05
380.98	0.0543251	-0.0312123	0.00446593	0.000148848	9.77851e-07	8.43082e-05
381.92	0.0565833	-0.031215	0.00465554	0.000153092	9.96817e-07	8.62984e-05
382.87	0.0588847	-0.0312091	0.00484903	0.000157412	1.01597e-06	8.83211e-05
383.83	0.0612295	-0.0311949	0.00504641	0.000161806	1.03532e-06	9.03764e-05
384.81	0.0636168	-0.0311729	0.00524759	0.000166275	1.05488e-06	9.24638e-05
385.77	0.0660466	-0.0311433	0.00545254	0.000170817	1.07463e-06	9.45832e-05
386.71	0.0685196	-0.0311058	0.00566134	0.000175434	1.09454e-06	9.67352e-05
387.64	0.0710342	-0.0310613	0.00587383	0.000180124	1.11468e-06	9.89187e-05
388.55	0.0735891	-0.0310108	0.00608984	0.000184883	1.1351e-06	0.000101133
389.47	0.0761865	-0.0309532	0.00630961	0.000189717	1.15579e-06	0.000103379
390.37	0.0788293	-0.0308869	0.00653343	0.000194629	1.17677e-06	0.00010566
391.27	0.0815188	-0.0308115	0.00676145	0.000199622	1.198e-06	0.000107976
392.17	0.0842576	-0.0307256	0.00699393	0.000204701	1.21943e-06	0.000110328
393.06	0.087045	-0.0306297	0.0072308	0.000209863	1.24112e-06	0.000112716
393.95	0.0898786	-0.0305254	0.00747178	0.000215105	1.26306e-06	0.00011514
394.84	0.09276	-0.0304118	0.00771704	0.000220431	1.27662e-06	0.000117599
395.76	0.0956903	-0.0302886	0.0079667	0.00022584	1.27515e-06	0.000120094
396.7	0.0986625	-0.0301564	0.00822009	0.000231316	1.2588e-06	0.000122624
397.65	0.101667	-0.0300153	0.00847643	0.000236832	1.22312e-06	0.000125184
398.59	0.104699	-0.0298662	0.00873512	0.000242372	1.17077e-06	0.000127772
399.54	0.107747	-0.02971	0.00899527	0.000247911	1.10362e-06	0.000130385
400.48	0.110809	-0.0295465	0.00925665	0.000253439	1.01477e-06	0.000133022
401.42	0.113885	-0.0293748	0.00951931	0.000258957	9.01713e-07	0.000135683
402.36	0.116966	-0.0291956	0.00978241	0.000264437	7.70509e-07	0.000138366
403.3	0.120044	-0.0290089	0.0100452	0.000269859	6.23518e-07	0.000141066
404.24	0.123118	-0.0288152	0.0103077	0.000275219	4.59089e-07	0.000143785
405.18	0.126187	-0.0286152	0.0105696	0.000280514	2.79079e-07	0.00014652
406.12	0.129247	-0.0284091	0.0108307	0.00028574	7.587e-08	0.000149272
407.06	0.132301	-0.0281969	0.0110912	0.000290896	-1.56382e-07	0.000152041
408.01	0.135337	-0.0279793	0.0113501	0.000295957	-4.14082e-07	0.000154823
408.97	0.138343	-0.027757	0.0116062	0.000300886	-6.98894e-07	0.000157613
409.93	0.141316	-0.0275304	0.0118592	0.000305675	-1.0049e-06	0.00016041
410.89	0.144248	-0.0273003	0.0121086	0.000310306	-1.32621e-06	0.000163211
411.85	0.147141	-0.027066	0.0123543	0.000314779	-1.66622e-06	0.000166018
412.8	0.150003	-0.0268264	0.0125972	0.000319115	-2.02321e-06	0.000168833
413.74	0.15283	-0.0265811	0.012837	0.000323306	-2.39883e-06	0.000171656
414.68	0.155625	-0.0263293	0.0130738	0.000327352	-2.7954e-06	0.000174488
415.61	0.158386	-0.0260711	0.0133076	0.00033125	-3.20885e-06	0.00017733
416.53	0.161108	-0.0258072	0.0135379	0.000334989	-3.63793e-06	0.000180178
417.45	0.163796	-0.0255368	0.013765	0.000338576	-4.09225e-06	0.000183034
418.37	0.166452	-0.0252591	0.0139894	0.000342021	-4.57759e-06	0.000185901
419.28	0.169065	-0.024975	0.0142099	0.000345292	-5.09322e-06	0.000188775
420.19	0.171622	-0.0246853	0.0144253	0.000348352	-5.64333e-06	0.000191649
421.1	0.174115	-0.0243908	0.014635	0.000351181	-6.22207e-06	0.000194522
422.01	0.176531	-0.0240924	0.0148377	0.000353744	-6.82512e-06	0.000197389
422.94	0.17887	-0.0237897	0.0150335	0.000356041	-7.45905e-06	0.000200249
423.89	0.181139	-0.0234815	0.015223	0.000358088	-8.12457e-06	0.000203106
424.84	0.183328	-0.0231683	0.0154054	0.000359858	-8.81348e-06	0.000205957
425.8	0.185432	-0.0228505	0.01558	0.000361334	-9.52162e-06	0.000208799
426.75	0.187452	-0.0225278	0.0157472	0.000362525	-1.02482e-05	0.000211634
427.7	0.189393	-0.0222008	0.0159072	0.000363437	-1.0989e-05	0.000214462
428.65	0.191256	-0.0218691	0.0160602	0.000364081	-1.17501e-05	0.000217285
429.6	0.193051	-0.0215324	0.0162071	0.000364478	-1.25355e-05	0.000220105
430.53	0.194772	-0.0211912	0.0163472	0.000364613	-1.33388e-05	0.000222922
431.47	0.19641	-0.0208459	0.0164799	0.000364461	-1.41591e-05	0.000225732
432.39	0.197968	-0.0204968	0.0166054	0.000364033	-1.50005e-05	0.000228535
433.32	0.199448	-0.0201441	0.0167237	0.000363332	-1.58638e-05	0.000231333
434.24	0.200847	-0.0197876	0.0168347	0.00036235	-1.67496e-05	0.000234124
435.15	0.202166	-0.0194266	0.0169385	0.000361088	-1.76598e-05	0.00023691
436.07	0.203402	-0.0190613	0.0170347	0.000359537	-1.8589e-05	0.00023969
436.98	0.20455	-0.0186915	0.0171231	0.000357683	-1.95337e-05	0.000242461
437.89	0.205614	-0.0183171	0.0172038	0.000355537	-2.04966e-05	0.000245227
438.8	0.2066	-0.0179384	0.0172775	0.000353115	-2.14767e-05	0.000247987
439.7	0.207508	-0.0175551	0.0173441	0.000350416	-2.24834e-05	0.000250744
440.61	0.20834	-0.0171671	0.0174037	0.000347445	-2.35247e-05	0.000253497
441.52	0.209085	-0.0167748	0.0174556	0.000344174	-2.45982e-05	0.000256244
442.43	0.209727	-0.0163791	0.0174981	0.000340556	-2.57081e-05	0.000258978
443.34	0.210258	-0.0159804	0.0175306	0.000336573	-2.68518e-05	0.000261696
444.25	0.210668	-0.0155796	0.0175521	0.000332194	-2.80272e-05	0.000264394
445.16	0.210951	-0.0151766	0.0175622	0.000327404	-2.92409e-05	0.000267071
446.07	0.211107	-0.0147713	0.0175608	0.000322203	-3.04955e-05	0.000269727
446.99	0.211124	-0.0143642	0.0175468	0.000316555	-3.17817e-05	0.000272357
447.9	0.210987	-0.013956	0.017519	0.000310424	-3.30949e-05	0.000274957
448.81	0.210703	-0.0135465	0.0174778	0.000303822	-3.44366e-05	0.000277529
449.71	0.210276	-0.0131357	0.0174238	0.000296767	-3.58034e-05	0.000280074
450.61	0.209709	-0.0127235	0.017357	0.00028926	-3.72035e-05	0.000282594
451.51	0.209006	-0.0123097	0.017278	0.000281319	-3.8643e-05	0.00028509
452.4	0.208159	-0.0118949	0.0171858	0.000272915	-4.0116e-05	0.000287559
453.3	0.207149	-0.0114798	0.017079	0.000263998	-4.16232e-05	0.000289994
454.19	0.205976	-0.0110646	0.0169574	0.000254572	-4.31577e-05	0.000292397
455.08	0.204639	-0.0106495	0.016821	0.00024463	-4.47123e-05	0.000294765
455.97	0.203141	-0.0102339	0.01667	0.000234178	-4.62895e-05	0.000297101
456.86	0.201493	-0.0098162	0.0165055	0.000223249	-4.78867e-05	0.00029941
457.75	0.199696	-0.00939608	0.0163275	0.000211839	-4.95039e-05	0.000301692
458.64	0.197752	-0.0089727	0.0161363	0.000199954	-5.1142e-05	0.000303949
459.53	0.195666	-0.00854556	0.0159323	0.000187607	-5.27956e-05	0.000306182
460.42	0.193441	-0.00811461	0.0157158	0.000174806	-5.44622e-05	0.000308392
461.31	0.191085	-0.00767872	0.0154875	0.00016157	-5.6151e-05	0.000310584
462.21	0.18861	-0.0072367	0.0152484	0.000147928	-5.78672e-05	0.000312762
463.11	0.186006	-0.006789	0.0149978	0.000133857	-5.96084e-05	0.000314923
464.01	0.183261	-0.00633626	0.0147345	0.000119322	-6.13778e-05	0.000317062
464.91	0.180373	-0.00587848	0.0144584	0.000104316	-6.31677e-05	0.000319179
465.81	0.177334	-0.0054162	0.0141687	8.88182e-05	-6.49721e-05	0.00032127
466.71	0.17415	-0.00494842	0.013866	7.28431e-05	-6.67966e-05	0.000323339
467.61	0.170836	-0.00447338	0.0135517	5.64303e-05	-6.86405e-05	0.000325392
468.51	0.167389	-0.00399111	0.0132253	3.95669e-05	-7.05066e-05	0.000327428
469.4	0.163806	-0.00350126	0.012887	2.22488e-05	-7.23987e-05	0.000329446
470.29	0.160089	-0.0030039	0.0125365	4.47648e-06	-7.43143e-05	0.000331447
471.19	0.15623	-0.00249992	0.0121734	-1.37678e-05	-7.62539e-05	0.000333428
472.08	0.152231	-0.00198906	0.0117977	-3.24793e-05	-7.82186e-05	0.00033539
472.97	0.148096	-0.00147124	0.0114098	-5.1652e-05	-8.02082e-05	0.000337335
473.86	0.143818	-0.000946716	0.0110091	-7.13001e-05	-8.22245e-05	0.000339259
474.75	0.139394	-0.000415461	0.0105952	-9.14359e-05	-8.42688e-05	0.000341163
475.64	0.134819	0.000122093	0.0101679	-0.000112068	-8.63345e-05	0.000343044
476.53	0.130089	0.000665347	0.00972664	-0.000133213	-8.8417e-05	0.000344901
477.42	0.125211	0.0012154	0.00927204	-0.000154852	-9.05177e-05	0.000346737
478.31	0.120196	0.00177383	0.00880524	-0.000176954	-9.26341e-05	0.000348557
479.2	0.115048	0.00234122	0.00832649	-0.000199516	-9.47699e-05	0.000350363
480.09	0.109772	0.00291875	0.00783643	-0.000222518	-9.69285e-05	0.000352157
480.98	0.10437	0.00350634	0.00733501	-0.000245964	-9.91054e-05	0.000353939
481.86	0.098833	0.00410315	0.00682161	-0.000269871	-0.0001013	0.000355707
482.74	0.0931687	0.00471011	0.00629682	-0.000294223	-0.000103523	0.000357464
483.61	0.0873818	0.00532791	0.00576112	-0.000319007	-0.000105782	0.000359212
484.48	0.0814591	0.00595561	0.00521329	-0.00034426	-0.000108077	0.000360946
485.35	0.0753847	0.00659225	0.00465191	-0.000370024	-0.000110414	0.00036266
486.22	0.0691476	0.007237	0.00407596	-0.000396329	-0.000112787	0.000364351
487.08	0.0627295	0.0078884	0.00348381	-0.000423225	-0.000115191	0.000366011
487.93	0.0561292	0.00854672	0.00287532	-0.000450715	-0.000117637	0.00036764
488.79	0.0493521	0.00921281	0.00225101	-0.000478787	-0.000120125	0.000369241
489.65	0.0423826	0.00988564	0.00160948	-0.000507483	-0.000122651	0.000370808
490.5	0.0352084	0.0105645	0.000949603	-0.000536836	-0.000125211	0.000372337
491.35	0.02783	0.0112496	0.00027143	-0.000566846	-0.000127808	0.000373827
492.2	0.0202457	0.0119406	-0.000425198	-0.000597517	-0.000130437	0.000375279
493.05	0.0124546	0.0126376	-0.00114037	-0.000628853	-0.000133109	0.000376693
493.9	0.00446032	0.0133412	-0.00187374	-0.000660845	-0.000135828	0.000378069
494.75	-0.00375188	0.0140502	-0.00262666	-0.000693532	-0.00013859	0.000379404
495.6	-0.0122028	0.0147633	-0.003401	-0.000726971	-0.000141398	0.000380688
496.45	-0.0208967	0.0154802	-0.00419716	-0.000761174	-0.000144243	0.00038192
497.3	-0.0298429	0.0162002	-0.00501597	-0.000796166	-0.000147115	0.000383098
498.15	-0.0390349	0.0169242	-0.00585686	-0.000831931	-0.000150019	0.000384223
499	-0.0484546	0.0176542	-0.00671813	-0.000868422	-0.000152951	0.000385304
499.85	-0.0581016	0.0183906	-0.00759976	-0.000905639	-0.000155913	0.000386341
500.7	-0.06797	0.0191344	-0.00850121	-0.000943569	-0.00015891	0.000387336
501.54	-0.0780574	0.0198859	-0.00942224	-0.000982206	-0.000161933	0.000388291
502.39	-0.0883691	0.0206447	-0.0103633	-0.00102156	-0.000164982	0.000389204
503.22	-0.0988937	0.0214123	-0.0113235	-0.00106161	-0.000168067	0.00039008
504.06	-0.109619	0.02219	-0.0123016	-0.00110233	-0.000171194	0.000390924
504.9	-0.120562	0.0229765	-0.013299	-0.00114374	-0.000174363	0.000391729
505.73	-0.131742	0.0237705	-0.0143177	-0.00118592	-0.000177578	0.000392488
506.56	-0.143168	0.0245714	-0.0153584	-0.00122889	-0.000180831	0.000393198
507.39	-0.154859	0.0253778	-0.0164228	-0.00127268	-0.000184115	0.000393853
508.22	-0.166808	0.0261906	-0.0175104	-0.0013173	-0.000187438	0.000394454
509.05	-0.178997	0.0270118	-0.0186194	-0.00136268	-0.000190801	0.00039501
509.88	-0.191438	0.0278407	-0.0197508	-0.00140887	-0.000194119	0.000395517
510.71	-0.204136	0.028677	-0.0209054	-0.00145588	-0.000197332	0.000395971
511.54	-0.217061	0.0295208	-0.0220801	-0.00150366	-0.00020044	0.000396383
512.37	-0.230173	0.0303715	-0.0232718	-0.00155218	-0.000203398	0.00039676
513.19	-0.243445	0.0312294	-0.0244778	-0.0016014	-0.000206235	0.000397111
514.03	-0.25683	0.032095	-0.0256941	-0.00165124	-0.000208973	0.000397448
514.86	-0.27032	0.0329675	-0.0269199	-0.00170171	-0.000211543	0.000397774
515.69	-0.28392	0.0338463	-0.0281558	-0.00175284	-0.000213923	0.000398084
516.52	-0.29759	0.034731	-0.0293982	-0.00180456	-0.000216168	0.00039839
517.36	-0.311296	0.035621	-0.030644	-0.00185686	-0.000218299	0.000398699
518.19	-0.325032	0.0365169	-0.0318928	-0.00190971	-0.0002203	0.000399014
519.02	-0.338789	0.0374198	-0.0331438	-0.00196309	-0.000222189	0.000399338
519.86	-0.352556	0.0383299	-0.0343959	-0.002017	-0.000223896	0.000399675
520.69	-0.366335	0.0392474	-0.0356494	-0.00207143	-0.000225364	0.000400024
521.51	-0.380084	0.0401725	-0.0369004	-0.00212634	-0.000226628	0.000400396
522.34	-0.393746	0.0411043	-0.038144	-0.00218165	-0.000227671	0.000400806
523.17	-0.407303	0.0420434	-0.0393786	-0.00223734	-0.000228553	0.000401259
523.99	-0.420724	0.0429902	-0.0406015	-0.00229336	-0.000229332	0.000401762
524.82	-0.434019	0.0439441	-0.0418134	-0.00234974	-0.000229977	0.000402314
525.64	-0.447224	0.0449045	-0.0430178	-0.00240654	-0.000230506	0.000402903
526.46	-0.460333	0.045871	-0.044214	-0.00246378	-0.000230901	0.00040353
527.28	-0.473354	0.0468427	-0.0454027	-0.00252147	-0.000231139	0.000404191
528.11	-0.486284	0.0478198	-0.0465836	-0.00257961	-0.000231261	0.000404889
528.92	-0.499098	0.0488029	-0.0477547	-0.00263818	-0.000231281	0.00040563
529.73	-0.511816	0.0497914	-0.0489177	-0.0026972	-0.000231104	0.000406407
530.53	-0.524458	0.0507851	-0.0500742	-0.00275673	-0.000230676	0.000407215
531.34	-0.536974	0.0517838	-0.0512199	-0.00281668	-0.000230003	0.000408068
532.14	-0.549301	0.0527875	-0.0523494	-0.00287699	-0.000229046	0.000408981
532.94	-0.561407	0.053796	-0.0534596	-0.00293761	-0.000227863	0.000409963
533.74	-0.573233	0.0548095	-0.0545454	-0.00299846	-0.000226496	0.000411029
534.54	-0.584783	0.0558276	-0.0556072	-0.00305956	-0.000224882	0.000412177
535.34	-0.596092	0.0568497	-0.056648	-0.00312097	-0.000223014	0.000413398
536.14	-0.607118	0.0578757	-0.0576642	-0.00318264	-0.000220968	0.000414702
536.93	-0.617831	0.0589051	-0.0586532	-0.00324454	-0.000218782	0.000416096
537.73	-0.628249	0.0599385	-0.0596164	-0.00330668	-0.000216462	0.000417577
538.53	-0.638377	0.060977	-0.0605543	-0.00336908	-0.000214049	0.000419145
539.33	-0.648232	0.0620209	-0.0614685	-0.00343176	-0.000211486	0.000420794
540.12	-0.657848	0.0630707	-0.0623619	-0.00349476	-0.000208735	0.000422518
540.91	-0.667201	0.0641267	-0.0632323	-0.00355805	-0.000205856	0.000424322
541.7	-0.676251	0.0651887	-0.0640763	-0.00362158	-0.000202855	0.000426217
542.49	-0.685012	0.0662576	-0.0648951	-0.00368537	-0.000199699	0.0004282
543.28	-0.693486	0.067334	-0.0656889	-0.00374942	-0.00019638	0.000430271
544.07	-0.701666	0.0684176	-0.0664569	-0.00381372	-0.000192893	0.000432433
544.85	-0.709559	0.0695078	-0.0671998	-0.0038783	-0.000189222	0.000434681
545.64	-0.717151	0.0706046	-0.0679165	-0.00394316	-0.000185414	0.00043702
546.42	-0.724425	0.0717073	-0.0686055	-0.00400827	-0.000181502	0.000439452
547.21	-0.731397	0.0728168	-0.0692681	-0.00407366	-0.000177462	0.000441975
547.99	-0.738088	0.073934	-0.0699062	-0.00413935	-0.000173303	0.000444585
548.78	-0.7445	0.0750589	-0.0705198	-0.00420534	-0.000168938	0.000447281
549.56	-0.750643	0.0761916	-0.0711101	-0.00427167	-0.000164292	0.00045006
550.35	-0.756473	0.0773319	-0.0716729	-0.00433827	-0.000159387	0.000452933
551.13	-0.761914	0.0784792	-0.0722017	-0.00440505	-0.000154186	0.000455919
551.92	-0.766938	0.0796333	-0.072694	-0.00447198	-0.00014871	0.000459026
552.7	-0.771496	0.0807943	-0.0731454	-0.004539	-0.000142983	0.000462267
553.48	-0.775565	0.0819619	-0.0735539	-0.00460608	-0.000136941	0.000465646
554.26	-0.779149	0.0831358	-0.0739199	-0.00467323	-0.000130562	0.000469162
555.04	-0.78219	0.0843157	-0.0742383	-0.0047404	-0.00012393	0.000472831
555.81	-0.784634	0.085501	-0.0745042	-0.00480751	-0.000117089	0.000476665
556.58	-0.786499	0.0866923	-0.0747193	-0.00487459	-0.000110024	0.00048066
557.35	-0.787811	0.0878905	-0.0748858	-0.00494167	-0.000102769	0.00048481
558.12	-0.788572	0.0890959	-0.075004	-0.00500875	-9.5246e-05	0.000489116
558.89	-0.788812	0.0903091	-0.0750764	-0.00507588	-8.73988e-05	0.000493569
559.66	-0.788485	0.0915299	-0.075099	-0.005143	-7.92821e-05	0.000498183
560.42	-0.787513	0.0927575	-0.0750649	-0.00521002	-7.089e-05	0.000502976
561.19	-0.785901	0.0939924	-0.0749746	-0.00527694	-6.22904e-05	0.000507947
561.95	-0.783637	0.0952349	-0.0748269	-0.00534376	-5.35554e-05	0.0005131
562.71	-0.780737	0.0964844	-0.0746234	-0.00541049	-4.46597e-05	0.000518429
563.48	-0.777261	0.0977408	-0.0743692	-0.00547725	-3.56307e-05	0.00052392
564.24	-0.773208	0.0990035	-0.0740645	-0.00554404	-2.64676e-05	0.00052957
565	-0.768594	0.100272	-0.0737105	-0.00561089	-1.71611e-05	0.000535375
565.76	-0.763443	0.101546	-0.0733095	-0.00567786	-7.76339e-06	0.000541329
566.52	-0.757765	0.102827	-0.0728623	-0.00574494	1.69918e-06	0.000547429
567.28	-0.751602	0.104113	-0.0723726	-0.00581221	1.13157e-05	0.000553664
568.03	-0.745003	0.105405	-0.0718448	-0.00587976	2.11355e-05	0.000560021
568.79	-0.737933	0.106703	-0.0712758	-0.00594753	3.11358e-05	0.000566508
569.55	-0.730336	0.108006	-0.0706606	-0.00601546	4.13467e-05	0.00057314
570.31	-0.722206	0.109314	-0.0699986	-0.00608356	5.16934e-05	0.000579918
571.08	-0.713504	0.110627	-0.0692867	-0.00615176	6.2116e-05	0.000586852
571.85	-0.704264	0.111945	-0.0685275	-0.00622014	7.26691e-05	0.000593933
572.61	-0.694558	0.113267	-0.0677276	-0.0062888	8.33458e-05	0.00060114
573.37	-0.684366	0.114593	-0.0668854	-0.00635772	9.41731e-05	0.000608479
574.14	-0.673688	0.115922	-0.0660006	-0.00642693	0.000105191	0.00061595
574.9	-0.662524	0.117256	-0.0650733	-0.00649642	0.000116374	0.000623551
575.66	-0.650841	0.118594	-0.0641006	-0.00656614	0.000127727	0.000631293
576.42	-0.638649	0.119937	-0.0630834	-0.00663611	0.00013926	0.000639174
577.17	-0.625959	0.121286	-0.0620226	-0.00670635	0.00015097	0.00064719
577.93	-0.612747	0.122639	-0.0609161	-0.00677683	0.000162874	0.000655349
578.69	-0.598998	0.123997	-0.0597627	-0.00684755	0.000174988	0.000663652
579.43	-0.584696	0.125361	-0.0585607	-0.00691847	0.000187241	0.000672106
580.18	-0.569813	0.12673	-0.057308	-0.00698957	0.000199592	0.000680717
580.92	-0.554387	0.128105	-0.0560076	-0.00706091	0.000212052	0.000689476
581.66	-0.538473	0.129484	-0.0546646	-0.00713258	0.000224595	0.000698366
582.4	-0.522087	0.130868	-0.0532804	-0.00720462	0.000237261	0.000707384
583.14	-0.505263	0.132255	-0.051858	-0.00727708	0.00025008	0.000716518
583.89	-0.487999	0.133647	-0.0503972	-0.00734997	0.000263009	0.000725771
584.63	-0.470262	0.135043	-0.0488951	-0.00742324	0.000276043	0.000735151
585.39	-0.452085	0.136444	-0.0473547	-0.00749695	0.000289286	0.000744648
586.14	-0.433492	0.137848	-0.0457779	-0.00757114	0.000302803	0.000754258
586.89	-0.414423	0.139258	-0.0441597	-0.00764574	0.000316601	0.000763994
587.64	-0.394811	0.140671	-0.0424939	-0.00772065	0.000330731	0.000773875
588.38	-0.374605	0.142088	-0.0407762	-0.00779582	0.000345139	0.000783914
589.12	-0.353724	0.14351	-0.0389994	-0.00787113	0.000359789	0.000794131
589.86	-0.332165	0.144935	-0.0371631	-0.0079466	0.000374762	0.000804527
590.6	-0.309955	0.146365	-0.0352697	-0.00802227	0.000390076	0.000815095
591.33	-0.287024	0.147798	-0.0333132	-0.00809806	0.000405677	0.000825853
592.07	-0.26332	0.149234	-0.031289	-0.00817389	0.000421546	0.000836813
592.8	-0.238846	0.150674	-0.0291971	-0.00824979	0.00043769	0.000847975
593.53	-0.213593	0.152117	-0.0270369	-0.00832574	0.000454087	0.000859342
594.25	-0.187558	0.153565	-0.0248082	-0.00840174	0.000470813	0.000870915
594.98	-0.16076	0.155017	-0.0225124	-0.00847783	0.000487925	0.000882687
595.7	-0.133132	0.156472	-0.0201439	-0.00855392	0.000505386	0.000894678
596.43	-0.104583	0.157931	-0.0176945	-0.0086299	0.000523212	0.00090691
597.15	-0.0750941	0.159394	-0.0151625	-0.00870573	0.000541315	0.000919388
597.87	-0.0446248	0.160861	-0.0125444	-0.00878139	0.000559614	0.000932123
598.59	-0.0132057	0.162332	-0.00984283	-0.00885691	0.000578142	0.000945106
599.31	0.0190777	0.163806	-0.00706542	-0.00893243	0.000596868	0.000958314
600.03	0.0522224	0.165283	-0.00421245	-0.00900796	0.000615814	0.000971746
600.75	0.0861988	0.166763	-0.00128653	-0.00908357	0.00063501	0.000985394
601.47	0.120995	0.168246	0.00171124	-0.00915926	0.000654391	0.000999253
602.2	0.156634	0.169731	0.00478294	-0.00923503	0.000673937	0.00101333
602.92	0.193062	0.171219	0.0079238	-0.00931095	0.000693757	0.00102761
603.64	0.230224	0.172709	0.0111289	-0.00938711	0.000713913	0.00104208
604.36	0.26819	0.174202	0.0144045	-0.00946343	0.00073439	0.00105676
605.11	0.30705	0.175697	0.0177585	-0.00953978	0.000755233	0.00107167
605.86	0.346843	0.177194	0.0211944	-0.00961612	0.000776362	0.00108682
606.61	0.387652	0.178693	0.0247194	-0.00969234	0.000797716	0.00110223
607.36	0.429444	0.180195	0.0283308	-0.00976849	0.000819367	0.00111789
608.11	0.472136	0.181698	0.0320211	-0.00984471	0.000841315	0.00113378
608.85	0.515777	0.183203	0.0357946	-0.00992094	0.000863886	0.00114992
609.6	0.560394	0.184709	0.0396538	-0.00999714	0.000887352	0.00116631
610.34	0.605869	0.186212	0.0435878	-0.0100731	0.000911689	0.00118283
611.09	0.652075	0.187701	0.0475847	-0.0101486	0.000937057	0.00119932
611.82	0.698899	0.189173	0.0516343	-0.0102234	0.000963392	0.00121568
612.54	0.746169	0.190619	0.0557208	-0.0102973	0.000990639	0.00123176
613.26	0.793864	0.192037	0.0598421	-0.0103702	0.00101906	0.00124748
613.98	0.842013	0.193425	0.0640007	-0.0104419	0.00104875	0.00126286
614.69	0.890471	0.194774	0.0681832	-0.0105121	0.00107946	0.00127771
615.39	0.93912	0.196077	0.0723786	-0.0105807	0.00111107	0.00129191
616.1	0.987937	0.197334	0.0765848	-0.0106474	0.00114366	0.00130543
616.8	1.03687	0.198543	0.0807977	-0.0107125	0.00117714	0.00131825
617.5	1.0859	0.199703	0.0850139	-0.0107759	0.00121183	0.00133035
618.21	1.135	0.200813	0.0892335	-0.0108376	0.00124797	0.00134171
618.91	1.18405	0.201866	0.0934425	-0.0108973	0.00128539	0.00135219
619.62	1.23282	0.202849	0.0976225	-0.0109545	0.00132417	0.00136154
620.32	1.28126	0.20376	0.101767	-0.0110093	0.00136411	0.00136972
621.02	1.32925	0.204594	0.105865	-0.0110615	0.001405	0.00137661
621.72	1.37683	0.205349	0.109921	-0.011111	0.00144699	0.00138222
622.43	1.42414	0.20603	0.113948	-0.0111578	0.00149002	0.00138665
623.13	1.47117	0.206636	0.117943	-0.011202	0.00153415	0.00138987
623.85	1.51794	0.207164	0.12191	-0.0112433	0.00157943	0.00139187
624.57	1.56446	0.207614	0.125848	-0.0112818	0.00162576	0.00139262
625.3	1.61062	0.207982	0.129748	-0.0113174	0.00167307	0.00139206
626.03	1.65651	0.208269	0.133618	-0.01135	0.00172174	0.00139022
626.75	1.7022	0.208478	0.137464	-0.0113798	0.00177198	0.00138716
627.47	1.74751	0.208598	0.14127	-0.0114063	0.00182376	0.00138269
628.19	1.79222	0.208619	0.145014	-0.0114292	0.00187723	0.00137657
628.89	1.8362	0.208532	0.148686	-0.0114483	0.0019322	0.00136867
629.59	1.87924	0.208328	0.152267	-0.0114632	0.00198853	0.00135878
630.29	1.92137	0.208005	0.155757	-0.0114739	0.00204644	0.00134689
630.99	1.96271	0.207568	0.159169	-0.0114804	0.00210598	0.00133309
631.68	2.00311	0.207007	0.16249	-0.0114824	0.00216679	0.00131723
632.38	2.04248	0.206318	0.165709	-0.0114798	0.00222869	0.00129918
633.07	2.08087	0.205502	0.168832	-0.0114726	0.00229167	0.001279
633.76	2.11829	0.204561	0.17186	-0.0114609	0.00235554	0.00125674
634.46	2.1548	0.203499	0.174798	-0.011445	0.00242054	0.00123244
635.16	2.19052	0.202322	0.177658	-0.011425	0.00248685	0.00120624
635.86	2.22537	0.201025	0.180432	-0.0114007	0.00255419	0.00117805
636.56	2.2592	0.199601	0.183106	-0.011372	0.00262253	0.00114771
637.28	2.29205	0.198051	0.185685	-0.0113389	0.00269205	0.00111528
638	2.32393	0.196378	0.188167	-0.0113016	0.00276281	0.00108078
638.72	2.35481	0.194578	0.190553	-0.0112599	0.00283483	0.00104416
639.45	2.38472	0.19265	0.192843	-0.0112138	0.00290819	0.00100543
640.18	2.41363	0.190591	0.195035	-0.0111631	0.00298265	0.000964507
640.9	2.44146	0.188397	0.197122	-0.0111075	0.00305806	0.00092132
641.63	2.46829	0.18607	0.19911	-0.0110474	0.00313456	0.000875931
642.35	2.49417	0.183616	0.201004	-0.0109829	0.00321209	0.000828433
643.08	2.51911	0.181033	0.202806	-0.0109139	0.00329104	0.000778817
643.8	2.54315	0.178323	0.204519	-0.0108405	0.00337173	0.000727117
644.53	2.56612	0.175476	0.206128	-0.0107624	0.00345408	0.000673153
645.24	2.58778	0.172478	0.207609	-0.0106791	0.00353823	0.000616627
645.95	2.608	0.169322	0.208951	-0.0105903	0.00362411	0.000557425
646.65	2.62661	0.165998	0.210139	-0.0104957	0.00371162	0.000495358
647.34	2.64354	0.162502	0.211166	-0.0103951	0.00380104	0.000430327
648.02	2.6588	0.158831	0.212032	-0.0102885	0.00389247	0.000362329
648.71	2.67218	0.154976	0.212719	-0.0101755	0.00398553	0.000291132
649.4	2.6835	0.150923	0.213208	-0.0100556	0.00408002	0.000216514
650.09	2.69281	0.146676	0.213507	-0.0099289	0.00417602	0.000138547
650.79	2.7002	0.142241	0.213622	-0.00979578	0.00427338	5.73383e-05
651.48	2.70569	0.137617	0.213555	-0.00965617	0.00437244	-2.71089e-05
652.19	2.70936	0.132811	0.213314	-0.00951032	0.00447345	-0.000114685
652.9	2.71106	0.127812	0.212886	-0.00935788	0.00457617	-0.00020557
653.62	2.71052	0.122605	0.212243	-0.00919827	0.00468062	-0.000300078
654.34	2.70774	0.11719	0.211388	-0.00903155	0.00478658	-0.000398189
655.04	2.70269	0.111565	0.210317	-0.00885765	0.00489378	-0.000499951
655.74	2.69542	0.105731	0.209035	-0.00867656	0.00500233	-0.000605327
656.43	2.68616	0.0996964	0.207562	-0.00848856	0.00511215	-0.000714124
657.11	2.67491	0.093461	0.205899	-0.00829356	0.00522322	-0.000826358
657.79	2.66174	0.0870248	0.204051	-0.00809151	0.00533556	-0.000942011
658.46	2.64674	0.0803918	0.202028	-0.00788254	0.005449	-0.00106099
659.13	2.62993	0.0735637	0.199831	-0.00766675	0.00556345	-0.00118327
659.79	2.61149	0.0665465	0.197475	-0.00744428	0.00567924	-0.00130872
660.46	2.59158	0.0593478	0.194977	-0.00721535	0.00579659	-0.00143717
661.12	2.57009	0.0519602	0.192325	-0.00697972	0.0059154	-0.00156876
661.78	2.54682	0.0443721	0.189501	-0.00673696	0.00603578	-0.00170372
662.45	2.52173	0.0365811	0.186502	-0.00648701	0.00615748	-0.00184209
663.11	2.49471	0.0285798	0.183317	-0.00622961	0.00628028	-0.00198401
663.78	2.46587	0.0203724	0.179956	-0.00596485	0.00640437	-0.00212939
664.45	2.43547	0.0119701	0.176444	-0.00569306	0.00652976	-0.00227799
665.13	2.40347	0.00336839	0.172775	-0.00541406	0.00665651	-0.00242989
665.81	2.36985	-0.00543473	0.168949	-0.00512775	0.00678476	-0.00258512
666.5	2.33462	-0.0144395	0.164965	-0.00483414	0.00691442	-0.00274369
667.19	2.29766	-0.0236516	0.160814	-0.0045331	0.00704551	-0.0029057
667.89	2.25899	-0.0330701	0.156496	-0.00422467	0.00717806	-0.00307112
668.61	2.21865	-0.0426933	0.152017	-0.0039089	0.0073121	-0.00323994
669.31	2.17656	-0.0525263	0.147368	-0.00358564	0.00744767	-0.00341223
670.01	2.13268	-0.0625735	0.142545	-0.00325471	0.00758483	-0.00358807
670.7	2.08693	-0.0728381	0.137541	-0.00291605	0.00772334	-0.00376753
671.39	2.03921	-0.083325	0.132348	-0.0025695	0.00786305	-0.0039507
672.07	1.98967	-0.0940297	0.126977	-0.00221519	0.00800403	-0.00413749
672.75	1.93852	-0.104944	0.12145	-0.00185332	0.00814618	-0.00432769
673.43	1.88581	-0.116065	0.115769	-0.00148391	0.00828963	-0.00452129
674.1	1.83169	-0.127391	0.109949	-0.00110704	0.00843449	-0.00471819
674.78	1.77614	-0.138922	0.103988	-0.000722683	0.00858062	-0.00491839
675.45	1.71903	-0.150663	0.0978743	-0.000330714	0.008728	-0.00512202
676.12	1.6605	-0.16261	0.0916195	6.87683e-05	0.00887703	-0.00532897
676.8	1.60062	-0.17476	0.0852317	0.00047568	0.00902799	-0.00553917
677.47	1.53919	-0.187125	0.0786914	0.000890402	0.00918088	-0.00575286
678.15	1.47597	-0.199718	0.0719755	0.00131342	0.00933592	-0.00597029
678.84	1.41076	-0.212551	0.0650676	0.00174503	0.00949291	-0.00619167
679.52	1.34327	-0.225637	0.0579402	0.00218574	0.00965171	-0.00641729
680.22	1.2735	-0.238979	0.0505924	0.00263564	0.00981264	-0.00664718
680.91	1.20154	-0.252575	0.0430335	0.00309466	0.00997578	-0.00688128
681.6	1.12716	-0.266437	0.0352408	0.00356326	0.0101409	-0.00711984
682.3	1.05015	-0.280578	0.0271964	0.00404182	0.010308	-0.00736308
683	0.970523	-0.294996	0.0189014	0.00453034	0.010477	-0.007611
683.69	0.888257	-0.309694	0.0103529	0.00502887	0.0106478	-0.00786363
684.38	0.803337	-0.324675	0.00154977	0.00553747	0.0108209	-0.00812099
685.07	0.71583	-0.339934	-0.00750183	0.00605606	0.0109963	-0.00838304
685.75	0.625497	-0.355486	-0.0168239	0.00658507	0.011174	-0.00865002
686.42	0.532008	-0.371349	-0.026447	0.00712511	0.0113541	-0.00892228
687.08	0.435294	-0.387526	-0.0363774	0.0076763	0.0115361	-0.00919991
687.74	0.335207	-0.404026	-0.0466288	0.00823892	0.0117198	-0.00948306
688.39	0.231865	-0.420846	-0.0571905	0.00881286	0.0119053	-0.00977163
689.04	0.125583	-0.437971	-0.0680336	0.00939772	0.0120926	-0.0100654
689.7	0.0163774	-0.455402	-0.0791568	0.00999356	0.0122817	-0.0103642
690.35	-0.095638	-0.473135	-0.0905498	0.0106003	0.0124726	-0.0106682
690.99	-0.210417	-0.49117	-0.102208	0.0112179	0.0126653	-0.0109772
691.64	-0.328046	-0.509512	-0.11414	0.0118465	0.0128596	-0.0112913
692.29	-0.448323	-0.528151	-0.126328	0.012486	0.0130558	-0.0116103
692.94	-0.571042	-0.547081	-0.138751	0.0131359	0.0132544	-0.0119342
693.59	-0.696458	-0.566314	-0.151435	0.0137969	0.0134552	-0.0122631
694.24	-0.824899	-0.585869	-0.164408	0.0144695	0.0136584	-0.0125974
694.89	-0.956503	-0.605752	-0.177685	0.0151539	0.0138636	-0.0129372
695.55	-1.09157	-0.625982	-0.191291	0.0158507	0.0140708	-0.0132829
696.22	-1.22999	-0.646553	-0.205218	0.0165597	0.01428	-0.0136343
696.89	-1.37143	-0.667451	-0.219436	0.0172806	0.0144915	-0.0139912
697.57	-1.51609	-0.688688	-0.233961	0.0180137	0.0146992	-0.0143538
698.24	-1.66405	-0.710268	-0.248803	0.0187593	0.0148989	-0.0147222
698.9	-1.8149	-0.732113	-0.263919	0.0195163	0.0150905	-0.0150954
699.56	-1.96821	-0.754112	-0.279264	0.0202835	0.0152709	-0.0154725
700.21	-2.12356	-0.776194	-0.294797	0.0210601	0.0154422	-0.0158525
700.85	-2.28035	-0.798252	-0.310459	0.0218447	0.0156057	-0.0162342
701.49	-2.43852	-0.820246	-0.326239	0.022637	0.0157566	-0.0166173
702.13	-2.59817	-0.842172	-0.342148	0.0234372	0.0158934	-0.0170018
702.76	-2.75879	-0.863918	-0.358134	0.0242439	0.01602	-0.0173866
703.39	-2.91997	-0.885385	-0.374153	0.0250562	0.0161379	-0.0177705
704.01	-3.08163	-0.906564	-0.390198	0.0258739	0.0162461	-0.0181535
704.64	-3.24359	-0.927448	-0.406253	0.0266968	0.0163459	-0.0185354
705.26	-3.40572	-0.948008	-0.422304	0.0275247	0.016432	-0.018916
705.89	-3.56802	-0.968249	-0.438351	0.0283577	0.0165007	-0.0192952
706.51	-3.72996	-0.98806	-0.454341	0.0291943	0.0165543	-0.0196718
707.14	-3.89084	-1.00729	-0.470202	0.030033	0.0165917	-0.0200443
707.77	-4.05041	-1.02588	-0.485909	0.0308731	0.016617	-0.0204121
708.4	-4.20827	-1.04378	-0.501421	0.0317137	0.0166343	-0.0207744
709.04	-4.36454	-1.06098	-0.51675	0.0325552	0.0166412	-0.0211313
709.68	-4.51976	-1.07757	-0.531948	0.0333987	0.0166391	-0.0214838
710.33	-4.67384	-1.0935	-0.547007	0.0342439	0.0166267	-0.0218316
710.98	-4.82694	-1.10879	-0.561938	0.0350912	0.0166025	-0.0221748
711.65	-4.979	-1.12342	-0.576738	0.0359405	0.0165693	-0.0225132
712.31	-5.12969	-1.13733	-0.591373	0.036791	0.0165279	-0.0228464
712.98	-5.2793	-1.15057	-0.60587	0.0376434	0.0164718	-0.0231746
713.64	-5.42809	-1.16316	-0.620256	0.0384984	0.0163971	-0.0234983
714.29	-5.57542	-1.17498	-0.634465	0.0393544	0.0163044	-0.0238162
714.94	-5.7205	-1.18586	-0.648419	0.0402094	0.0161908	-0.0241265
715.59	-5.86293	-1.19572	-0.662073	0.0410625	0.0160603	-0.0244282
716.23	-6.00193	-1.20441	-0.675351	0.0419119	0.0159159	-0.0247198
716.86	-6.13758	-1.21193	-0.68826	0.0427576	0.0157532	-0.0250011
717.5	-6.27037	-1.21833	-0.700846	0.0436008	0.0155716	-0.0252731
718.13	-6.39975	-1.22352	-0.713056	0.0444401	0.0153767	-0.0255345
718.77	-6.52538	-1.22741	-0.724852	0.0452748	0.0151711	-0.0257845
719.4	-6.64744	-1.23004	-0.736254	0.0461053	0.0149554	-0.0260235
720.03	-6.76597	-1.23145	-0.747268	0.046932	0.0147324	-0.0262519
720.67	-6.88118	-1.23167	-0.757914	0.0477555	0.014498	-0.0264701
721.32	-6.99349	-1.23079	-0.768235	0.0485768	0.0142497	-0.0266791
721.99	-7.10257	-1.22876	-0.778198	0.0493954	0.0139917	-0.0268782
722.66	-7.20792	-1.22547	-0.787753	0.0502099	0.0137244	-0.0270663
723.34	-7.3097	-1.22096	-0.796917	0.051021	0.0134454	-0.0272438
724.01	-7.4079	-1.21525	-0.805688	0.0518287	0.013154	-0.0274109
724.68	-7.50245	-1.2083	-0.814059	0.0526328	0.01285	-0.0275672
725.35	-7.59345	-1.20012	-0.822041	0.0534336	0.0125321	-0.0277129
726.01	-7.68076	-1.19066	-0.829615	0.0542307	0.0122038	-0.0278475
726.67	-7.76417	-1.17987	-0.836761	0.0550235	0.0118675	-0.0279704
727.33	-7.84387	-1.1678	-0.843499	0.0558127	0.0115213	-0.0280822
727.99	-7.92007	-1.1545	-0.849852	0.0565989	0.011166	-0.0281835
728.64	-7.9928	-1.13999	-0.855822	0.0573824	0.0107953	-0.0282744
729.29	-8.06222	-1.12427	-0.861423	0.0581634	0.0104039	-0.0283551
729.95	-8.12773	-1.10724	-0.866597	0.0589406	0.00999334	-0.0284243
730.6	-8.18843	-1.08867	-0.871249	0.0597116	0.00956094	-0.0284798
731.24	-8.24394	-1.06851	-0.875342	0.0604755	0.00910827	-0.0285207
731.89	-8.29364	-1.04661	-0.878812	0.0612309	0.00863696	-0.0285458
732.54	-8.33725	-1.02291	-0.88163	0.0619771	0.00814245	-0.0285542
733.19	-8.37484	-0.997409	-0.883802	0.0627141	0.00762311	-0.028546
733.84	-8.40568	-0.96995	-0.885254	0.0634403	0.00708508	-0.0285195
734.48	-8.4291	-0.940378	-0.885917	0.0641538	0.00653149	-0.0284732
735.13	-8.44532	-0.908746	-0.885812	0.0648554	0.00596128	-0.0284074
735.78	-8.45463	-0.875131	-0.884972	0.0655459	0.00537676	-0.0283232
736.43	-8.45706	-0.839537	-0.883398	0.0662256	0.0047725	-0.0282204
737.08	-8.45296	-0.802043	-0.881127	0.0668953	0.00414438	-0.0281001
737.73	-8.44174	-0.762524	-0.878099	0.0675538	0.00349636	-0.0279607
738.38	-8.42246	-0.720765	-0.874216	0.0681985	0.002828	-0.0278001
739.03	-8.39516	-0.676782	-0.869484	0.0688296	0.00214402	-0.0276185
739.69	-8.35967	-0.630544	-0.863885	0.0694469	0.00144943	-0.0274154
740.35	-8.31624	-0.582077	-0.857442	0.0700509	0.000742434	-0.0271912
741.01	-8.26561	-0.531519	-0.850232	0.0706434	2.49052e-05	-0.0269475
741.67	-8.20785	-0.478859	-0.842258	0.0712244	-0.000703145	-0.0266843
742.33	-8.14315	-0.424111	-0.833539	0.0717945	-0.00144235	-0.0264017
742.99	-8.07184	-0.36734	-0.824108	0.0723544	-0.0021891	-0.0261006
743.64	-7.99403	-0.308573	-0.813976	0.0729046	-0.00294156	-0.0257812
744.28	-7.91027	-0.247899	-0.803199	0.0734463	-0.00370599	-0.0254445
744.92	-7.82121	-0.185435	-0.79184	0.0739812	-0.00448589	-0.025092
745.55	-7.72641	-0.121084	-0.779855	0.0745081	-0.00527965	-0.0247225
746.18	-7.62517	-0.0546922	-0.767171	0.0750254	-0.00608938	-0.0243345
746.81	-7.5174	0.0137647	-0.75378	0.0755328	-0.00690987	-0.0239276
747.43	-7.40263	0.0843841	-0.739635	0.0760292	-0.00773694	-0.0235009
748.06	-7.28131	0.157099	-0.724777	0.0765156	-0.00857443	-0.0230551
748.68	-7.15437	0.231743	-0.709302	0.0769944	-0.00942189	-0.0225921
749.3	-7.0216	0.308372	-0.693186	0.077465	-0.0102811	-0.0221115
749.93	-6.883	0.387004	-0.676429	0.0779273	-0.0111549	-0.0216129
750.55	-6.73856	0.467638	-0.659029	0.0783814	-0.0120414	-0.0210966
751.18	-6.58784	0.550348	-0.640943	0.0788264	-0.0129411	-0.0205615
751.82	-6.43096	0.635115	-0.622183	0.0792626	-0.0138545	-0.020008
752.45	-6.26803	0.721912	-0.602761	0.0796905	-0.0147816	-0.0194364
753.1	-6.09878	0.810801	-0.582647	0.0801094	-0.0157236	-0.0188459
753.75	-5.92302	0.901836	-0.561823	0.0805188	-0.0166814	-0.0182361
754.4	-5.74051	0.995054	-0.540265	0.0809182	-0.0176503	-0.0176065
755.05	-5.55092	1.09052	-0.517939	0.081307	-0.0186273	-0.0169564
755.71	-5.35471	1.18816	-0.49489	0.0816862	-0.0196132	-0.0162868
756.36	-5.15266	1.28785	-0.471197	0.0820577	-0.0206064	-0.015599
757.01	-4.94497	1.38956	-0.446877	0.0824218	-0.0216094	-0.0148934
757.66	-4.73211	1.49322	-0.421977	0.0827798	-0.0226245	-0.014171
758.3	-4.51403	1.59884	-0.396494	0.0831316	-0.0236486	-0.0134315
758.94	-4.29032	1.7065	-0.370384	0.0834763	-0.0246814	-0.0126742
759.57	-4.06138	1.81612	-0.343689	0.0838149	-0.0257301	-0.0118998
760.2	-3.82755	1.92765	-0.316442	0.0841483	-0.0267996	-0.0111091
760.82	-3.58808	2.04126	-0.288565	0.0844745	-0.0278899	-0.0103002
761.45	-3.34208	2.15711	-0.259969	0.0847915	-0.0290051	-0.00947129
762.07	-3.08894	2.27535	-0.230591	0.0850979	-0.0301411	-0.00862085
762.7	-2.82759	2.39618	-0.200324	0.085391	-0.0312954	-0.00774663
763.32	-2.55801	2.51963	-0.169165	0.0856708	-0.0324739	-0.00684844
763.95	-2.28057	2.64563	-0.137148	0.0859382	-0.0336778	-0.00592696
764.58	-1.99438	2.77437	-0.104186	0.0861911	-0.0349031	-0.00498022
765.21	-1.69879	2.906	-0.0702087	0.0864277	-0.0361487	-0.00400665
765.85	-1.39382	3.04051	-0.0352206	0.0866484	-0.0374149	-0.00300632
766.49	-1.07937	3.17792	0.000790059	0.0868529	-0.0387004	-0.001979
767.13	-0.755384	3.31824	0.0378276	0.0870411	-0.0400104	-0.000924568
767.78	-0.422106	3.46145	0.075869	0.0872136	-0.0413489	0.000156511
768.42	-0.0786946	3.6077	0.114999	0.0873685	-0.0427133	0.00126612
769.06	0.276011	3.75725	0.155337	0.087503	-0.0441049	0.00240687
769.7	0.642257	3.91014	0.196907	0.0876164	-0.0455173	0.00357933
770.34	1.02057	4.06648	0.239763	0.0877076	-0.046945	0.00478465
770.99	1.41052	4.22621	0.283863	0.0877775	-0.0483903	0.00602205
771.63	1.81101	4.38912	0.329096	0.0878289	-0.049851	0.00728923
772.28	2.22198	4.55522	0.375458	0.0878619	-0.0513287	0.00858618
772.92	2.64303	4.72444	0.422908	0.0878774	-0.0528254	0.00991217
773.56	3.074	4.89677	0.471432	0.0878759	-0.0543367	0.0112669
774.19	3.51519	5.07227	0.52106	0.0878567	-0.055861	0.012651
774.82	3.96589	5.2508	0.571722	0.0878215	-0.0574062	0.0140632
775.44	4.42537	5.43226	0.623344	0.087772	-0.0589765	0.0155018
776.06	4.89454	5.61681	0.676019	0.0877063	-0.0605709	0.016969
776.67	5.37456	5.8047	0.729864	0.0876213	-0.0621926	0.0184672
777.29	5.86589	5.99603	0.784928	0.0875161	-0.063836	0.0199977
777.9	6.36961	6.19101	0.841318	0.087388	-0.0654967	0.0215627
778.51	6.88531	6.38958	0.898995	0.0872381	-0.0671799	0.0231615
779.13	7.41186	6.59153	0.957846	0.0870691	-0.0688857	0.0247917
779.74	7.94991	6.79701	1.01794	0.0868794	-0.0705833	0.0264549
780.36	8.49978	7.00608	1.0793	0.0866682	-0.0722508	0.0281517
780.98	9.06082	7.2184	1.14181	0.086436	-0.0738874	0.0298786
781.6	9.6326	7.43358	1.20531	0.0861819	-0.0754769	0.0316309
782.23	10.2144	7.65128	1.2697	0.0859065	-0.077031	0.0334053
782.86	10.8052	7.87101	1.33476	0.085611	-0.0785576	0.0351962
783.5	11.405	8.09269	1.40048	0.085294	-0.080032	0.0370028
784.13	12.0146	8.31638	1.4669	0.084954	-0.0814463	0.0388257
784.76	12.6332	8.54166	1.53386	0.0845909	-0.0828195	0.0406602
785.39	13.2604	8.76814	1.60124	0.0842038	-0.0841581	0.0425023
786.01	13.896	8.99578	1.669	0.0837933	-0.0854576	0.0443514
786.63	14.5394	9.22447	1.73709	0.0833609	-0.086724	0.0462062
787.24	15.1904	9.4541	1.80546	0.0829064	-0.0879315	0.0480655
787.85	15.849	9.68471	1.87412	0.0824299	-0.0890607	0.0499296
788.45	16.5144	9.91582	1.94289	0.0819315	-0.090123	0.0517933
789.05	17.1859	10.1468	2.01156	0.0814109	-0.0911125	0.0536502
789.65	17.8628	10.3776	2.08004	0.0808685	-0.0920525	0.0554978
790.24	18.5444	10.6076	2.1482	0.080305	-0.092965	0.0573327
790.83	19.2314	10.8372	2.2161	0.0797191	-0.0938383	0.0591559
791.42	19.9248	11.0667	2.2839	0.0791089	-0.0946798	0.0609721
792.01	20.6247	11.296	2.35159	0.0784737	-0.0954823	0.0627804
792.59	21.3319	11.5252	2.41922	0.0778117	-0.0962369	0.0645819
793.19	22.0462	11.7543	2.48678	0.0771229	-0.0969597	0.0663762
793.78	22.7671	11.9831	2.55416	0.076408	-0.0976554	0.0681606
794.37	23.4952	12.2117	2.62145	0.0756656	-0.0982897	0.0699372
794.97	24.2312	12.4404	2.68875	0.0748946	-0.098842	0.0717087
795.57	24.9741	12.6687	2.75586	0.0740952	-0.0993151	0.073469
796.18	25.7229	12.8958	2.82251	0.0732675	-0.099694	0.0752108
796.79	26.4769	13.1214	2.88859	0.0724117	-0.100001	0.0769301
797.4	27.2349	13.345	2.95384	0.0715283	-0.100251	0.07862
798.02	27.9973	13.5664	3.01829	0.0706163	-0.100423	0.0802811
798.64	28.7652	13.7862	3.08211	0.0696738	-0.100512	0.0819175
799.27	29.5378	14.0038	3.14512	0.0687009	-0.100547	0.0835243
799.89	30.3148	14.219	3.20723	0.067697	-0.100539	0.0850981
800.5	31.0965	14.432	3.26848	0.0666623	-0.100492	0.0866409
801.11	31.8825	14.6427	3.32888	0.065598	-0.10042	0.0881533
801.72	32.6733	14.8515	3.38851	0.0645037	-0.100302	0.0896374
802.32	33.4695	15.0586	3.44749	0.0633796	-0.100126	0.0910972
802.92	34.2704	15.2639	3.50573	0.062226	-0.0999122	0.0925298
803.51	35.0755	15.4668	3.56306	0.0610426	-0.0996624	0.0939305
804.1	35.8848	15.6676	3.61954	0.0598302	-0.0993657	0.0953011
804.69	36.6982	15.8663	3.67516	0.0585894	-0.0990201	0.0966417
805.28	37.5157	16.0628	3.7299	0.0573192	-0.0986235	0.0979515
805.87	38.3379	16.2572	3.7838	0.0560185	-0.0981702	0.0992314
806.47	39.1646	16.4493	3.83681	0.0546869	-0.0976771	0.10048
807.06	39.9957	16.639	3.88889	0.0533232	-0.0971551	0.101695
807.65	40.8316	16.8265	3.94007	0.0519279	-0.0965963	0.102878
808.25	41.6722	17.012	3.99044	0.0505021	-0.096004	0.104033
808.85	42.5177	17.1954	4.04001	0.049045	-0.0953468	0.105159
809.45	43.3684	17.377	4.08881	0.0475564	-0.0945982	0.106257
810.06	44.2236	17.5563	4.13668	0.0460361	-0.0937654	0.107322
810.67	45.0821	17.7324	4.18332	0.0444835	-0.0928353	0.108346
811.29	45.9433	17.905	4.22861	0.0428986	-0.0918162	0.109324
811.89	46.8064	18.0737	4.27235	0.0412816	-0.0907163	0.110252
812.49	47.6712	18.2381	4.31447	0.0396317	-0.0895127	0.111126
813.1	48.5379	18.3983	4.35498	0.0379482	-0.0881975	0.111947
813.7	49.4056	18.5537	4.39365	0.036231	-0.0868009	0.112709
814.3	50.2735	18.7037	4.43028	0.0344792	-0.0853385	0.113404
814.9	51.1419	18.8485	4.46493	0.0326931	-0.0838051	0.114035
815.5	52.0109	18.9884	4.4977	0.0308735	-0.0822122	0.114605
816.11	52.8808	19.1234	4.5286	0.0290201	-0.0805328	0.115114
816.71	53.7518	19.2539	4.55773	0.0271331	-0.0787463	0.115566
817.31	54.6234	19.3793	4.58492	0.0252123	-0.0768724	0.115955
817.9	55.4942	19.4989	4.60986	0.023257	-0.0749088	0.116273
818.52	56.3644	19.6126	4.63257	0.0212675	-0.0728817	0.11652
819.14	57.2337	19.7204	4.653	0.0192437	-0.0708179	0.116693
819.77	58.1027	19.8225	4.67122	0.0171846	-0.0687084	0.116797
820.39	58.9728	19.9194	4.6875	0.0150886	-0.0665638	0.116836
821	59.8444	20.0113	4.70184	0.0129548	-0.0643833	0.116813
821.61	60.7182	20.0982	4.71433	0.0107815	-0.0621631	0.116727
822.21	61.5948	20.1805	4.72507	0.00856832	-0.0599234	0.116584
822.8	62.4742	20.2583	4.73409	0.00631542	-0.0576738	0.116383
823.39	63.3576	20.332	4.74157	0.00402136	-0.0553816	0.116129
823.98	64.2463	20.4022	4.74774	0.00168493	-0.0530285	0.115829
824.57	65.1397	20.4686	4.75245	-0.000694093	-0.0506231	0.115479
825.15	66.0369	20.5304	4.75549	-0.0031161	-0.0481541	0.115072
825.75	66.9378	20.5877	4.75682	-0.00558148	-0.0456499	0.114606
826.39	67.8419	20.6401	4.7563	-0.00809023	-0.0431328	0.114078
827.02	68.75	20.6879	4.75407	-0.0106438	-0.0405826	0.113492
827.65	69.664	20.7318	4.75045	-0.0132438	-0.0380022	0.112857
828.27	70.5838	20.7718	4.74537	-0.0158911	-0.0353808	0.112169
828.89	71.5096	20.8078	4.73883	-0.0185866	-0.032703	0.111429
829.52	72.4413	20.8399	4.73083	-0.0213301	-0.0299788	0.110638
830.16	73.3781	20.8676	4.72124	-0.0241209	-0.0272058	0.109791
830.79	74.3204	20.8911	4.71008	-0.0269594	-0.0243812	0.108889
831.42	75.2682	20.9105	4.69741	-0.0298455	-0.0215062	0.107934
832.05	76.2213	20.9255	4.68313	-0.0327796	-0.0185735	0.106923
832.68	77.1795	20.9361	4.66718	-0.0357622	-0.0155783	0.105854
833.32	78.1425	20.942	4.64949	-0.038793	-0.0125465	0.104725
833.95	79.1096	20.9429	4.62996	-0.0418718	-0.00949466	0.103533
834.59	80.082	20.9393	4.60873	-0.0449998	-0.00641819	0.102283
835.23	81.0611	20.9318	4.58608	-0.0481791	-0.00332717	0.100981
835.86	82.0475	20.9206	4.56205	-0.0514106	-0.000206677	0.0996295
836.5	83.0424	20.906	4.53682	-0.0546959	0.00295536	0.0982321
837.14	84.0456	20.888	4.51037	-0.0580352	0.00614194	0.0967888
837.78	85.0564	20.8663	4.48256	-0.0614276	0.00935125	0.0952957
838.42	86.0756	20.8412	4.45354	-0.0648744	0.012622	0.0937568
839.07	87.104	20.8131	4.42341	-0.0683765	0.015978	0.092175
839.72	88.1405	20.7813	4.39193	-0.0719337	0.0194212	0.0905433
840.38	89.1839	20.745	4.35883	-0.0755463	0.0229716	0.0888535
841.02	90.2332	20.7037	4.3239	-0.079214	0.0266081	0.0870999
841.65	91.2869	20.6565	4.28681	-0.0829362	0.0303173	0.0852726
842.29	92.345	20.6034	4.24755	-0.0867138	0.0341292	0.0833714
842.94	93.4084	20.5447	4.20624	-0.090548	0.0380508	0.0813996
843.59	94.4759	20.4796	4.16262	-0.0944388	0.0420612	0.079349
844.23	95.5466	20.4076	4.11646	-0.0983864	0.0461545	0.0772132
844.87	96.6206	20.3288	4.06778	-0.102391	0.0503325	0.0749928
845.51	97.6978	20.243	4.01655	-0.106453	0.0545872	0.0726867
846.16	98.7781	20.1502	3.96275	-0.110572	0.0589469	0.0702947
846.8	99.8622	20.0506	3.90646	-0.11475	0.0634319	0.0678188
847.44	100.949	19.9435	3.84742	-0.118985	0.0680288	0.0652514
848.08	102.036	19.8279	3.78525	-0.123278	0.0727436	0.0625815
848.71	103.124	19.7037	3.71988	-0.127629	0.0775431	0.059807
849.34	104.211	19.5703	3.65115	-0.132038	0.0823973	0.056923
849.98	105.299	19.4281	3.57919	-0.136506	0.0873184	0.0539333
850.62	106.39	19.2782	3.50436	-0.141036	0.0922943	0.0508482
851.25	107.484	19.1204	3.42669	-0.145627	0.0973337	0.047668
851.9	108.582	18.9552	3.34632	-0.150281	0.102447	0.0443964
852.54	109.684	18.7827	3.26329	-0.154999	0.107611	0.0410349
853.18	110.789	18.6026	3.17752	-0.159781	0.112817	0.0375806
853.8	111.9	18.4156	3.08924	-0.164628	0.118106	0.0340402
854.43	113.018	18.2222	2.99868	-0.169543	0.1235	0.0304203
855.05	114.141	18.0218	2.90557	-0.174523	0.128995	0.0267125
855.68	115.268	17.8133	2.80952	-0.179571	0.134607	0.0229061
856.32	116.397	17.5963	2.7104	-0.184684	0.140306	0.0189966
856.98	117.528	17.3699	2.60785	-0.189864	0.146068	0.0149743
857.63	118.662	17.1344	2.50202	-0.195111	0.151921	0.0108427
858.26	119.799	16.8909	2.39327	-0.200427	0.157865	0.00661236
858.87	120.94	16.6388	2.2814	-0.205812	0.163792	0.00227709
859.48	122.084	16.3778	2.16632	-0.211267	0.169628	-0.00216609
860.08	123.232	16.1089	2.04836	-0.216776	0.175367	-0.00670555
860.7	124.383	15.8335	1.9279	-0.222316	0.180952	-0.0113294
861.33	125.538	15.5527	1.80527	-0.227873	0.186427	-0.0160263
861.97	126.698	15.268	1.68103	-0.233427	0.191822	-0.0207787
862.62	127.862	14.9796	1.55519	-0.238968	0.197051	-0.0255855
863.3	129.03	14.6873	1.42761	-0.244495	0.202087	-0.0304505
863.99	130.202	14.3924	1.29872	-0.249983	0.206991	-0.0353598
864.68	131.378	14.0959	1.16883	-0.255411	0.211784	-0.0403024
865.37	132.557	13.7982	1.03804	-0.260779	0.216452	-0.0452757
866.05	133.742	13.4997	0.90655	-0.266089	0.221014	-0.050274
866.72	134.933	13.2009	0.77446	-0.271334	0.225381	-0.055294
867.38	136.129	12.9016	0.641787	-0.276516	0.22949	-0.0603355
868.04	137.331	12.6034	0.508984	-0.281613	0.233375	-0.0653838
868.7	138.54	12.3081	0.376611	-0.286594	0.237017	-0.0704198
869.38	139.756	12.0164	0.244912	-0.291449	0.240502	-0.0754361
870.03	140.979	11.7296	0.114248	-0.296166	0.243908	-0.0804212
870.66	142.209	11.447	-0.0155425	-0.300744	0.247196	-0.0853798
871.26	143.445	11.1673	-0.144944	-0.305197	0.250392	-0.0903271
871.86	144.687	10.8907	-0.273932	-0.309517	0.25347	-0.095262
872.45	145.933	10.6167	-0.402676	-0.313703	0.256397	-0.100189
873.09	147.184	10.3454	-0.531132	-0.317752	0.259232	-0.105107
873.75	148.44	10.0778	-0.659005	-0.321655	0.261992	-0.110007
874.42	149.701	9.81302	-0.786566	-0.325417	0.264556	-0.114898
875.09	150.966	9.55032	-0.914073	-0.329044	0.266851	-0.119786
875.76	152.235	9.29147	-1.04098	-0.33251	0.268887	-0.124655
876.42	153.51	9.03856	-1.16663	-0.335783	0.270611	-0.129483
877.09	154.79	8.79278	-1.29066	-0.338846	0.272102	-0.134257
877.76	156.077	8.55618	-1.41241	-0.341668	0.27342	-0.138957
878.42	157.369	8.32853	-1.53199	-0.344248	0.27448	-0.143586
879.07	158.666	8.10849	-1.64983	-0.346599	0.275276	-0.148157
879.73	159.968	7.89749	-1.76551	-0.348697	0.275896	-0.152656
880.4	161.276	7.69647	-1.87874	-0.350524	0.276381	-0.157073
881.09	162.588	7.50493	-1.98967	-0.352092	0.276744	-0.161414
881.78	163.907	7.32282	-2.09828	-0.353407	0.277032	-0.165679
882.49	165.232	7.14956	-2.20475	-0.35448	0.277174	-0.169874
883.19	166.564	6.984	-2.30942	-0.355328	0.277127	-0.174011
883.86	167.902	6.82705	-2.41201	-0.355941	0.276959	-0.17808
884.53	169.248	6.68006	-2.5121	-0.356296	0.276676	-0.182069
885.21	170.601	6.54261	-2.6098	-0.356405	0.276244	-0.18598
885.89	171.962	6.41478	-2.70507	-0.356271	0.27566	-0.189813
886.58	173.331	6.29672	-2.79787	-0.355887	0.274913	-0.193567
887.29	174.707	6.18808	-2.88834	-0.355252	0.273987	-0.197246
887.99	176.091	6.08928	-2.97637	-0.354358	0.272936	-0.200845
888.7	177.482	6.00082	-3.0618	-0.35319	0.271796	-0.20436
889.41	178.88	5.92223	-3.14479	-0.351761	0.270542	-0.207796
890.12	180.286	5.85293	-3.22547	-0.350085	0.269184	-0.211158
890.81	181.7	5.79284	-3.30389	-0.348162	0.267617	-0.214448
891.47	183.122	5.74155	-3.38016	-0.345996	0.265749	-0.217669
892.13	184.552	5.70062	-3.45382	-0.343564	0.263605	-0.220806
892.77	185.991	5.67253	-3.5241	-0.340821	0.26114	-0.223834
893.42	187.438	5.65827	-3.59071	-0.337752	0.258382	-0.226742
894.08	188.894	5.65957	-3.6531	-0.334333	0.255361	-0.229513
894.74	190.36	5.67711	-3.71106	-0.330548	0.251998	-0.23214
895.42	191.834	5.71074	-3.76468	-0.326397	0.248266	-0.234625
896.09	193.318	5.76239	-3.81334	-0.321848	0.244268	-0.236949
896.78	194.81	5.83388	-3.85651	-0.316867	0.240055	-0.239092
897.47	196.312	5.92461	-3.89435	-0.311468	0.23561	-0.241061
898.16	197.825	6.03381	-3.92709	-0.305667	0.230972	-0.242863
898.87	199.347	6.16141	-3.95474	-0.299466	0.226049	-0.244501
899.58	200.879	6.30648	-3.97759	-0.292881	0.220772	-0.245982
900.28	202.423	6.47055	-3.99516	-0.285887	0.215207	-0.247292
900.98	203.977	6.65621	-4.00666	-0.27844	0.209346	-0.248404
901.66	205.542	6.86334	-4.01212	-0.270543	0.203283	-0.24932
902.33	207.118	7.09239	-4.01141	-0.26219	0.197117	-0.250035
902.99	208.706	7.34269	-4.00474	-0.253387	0.190814	-0.250555
903.65	210.303	7.61212	-3.99282	-0.244158	0.184415	-0.250905
904.32	211.909	7.90051	-3.97571	-0.234501	0.177915	-0.251084
905.01	213.524	8.20729	-3.95363	-0.224416	0.171299	-0.2511
905.68	215.147	8.53153	-3.92687	-0.213917	0.16464	-0.250962
906.34	216.778	8.87296	-3.89551	-0.203009	0.157973	-0.250674
907	218.417	9.23002	-3.86005	-0.191709	0.151182	-0.25025
907.67	220.062	9.60093	-3.82109	-0.18004	0.144204	-0.249711
908.35	221.715	9.98689	-3.77825	-0.167981	0.137069	-0.249044
909.07	223.374	10.3898	-3.73096	-0.155502	0.129736	-0.248229
909.78	225.041	10.8098	-3.67915	-0.142596	0.122308	-0.247266
910.5	226.716	11.2482	-3.62243	-0.129245	0.114864	-0.24614
911.22	228.397	11.7038	-3.56122	-0.115461	0.107334	-0.244865
911.94	230.083	12.174	-3.49635	-0.101275	0.0997273	-0.243468
912.66	231.775	12.6593	-3.42768	-0.086675	0.0920038	-0.241943
913.38	233.471	13.1597	-3.35521	-0.0716565	0.0841069	-0.240291
914.1	235.173	13.6753	-3.27895	-0.0562203	0.0760725	-0.238513
914.81	236.881	14.2072	-3.19849	-0.0403532	0.0678916	-0.236594
915.53	238.595	14.7552	-3.11394	-0.024059	0.0595549	-0.234539
916.25	240.315	15.3188	-3.02539	-0.00734384	0.0510691	-0.232351
916.97	242.042	15.8989	-2.9326	0.00980485	0.0424055	-0.230023
917.69	243.775	16.496	-2.83545	0.0273986	0.0335471	-0.227549
918.39	245.515	17.1106	-2.73372	0.0454441	0.0245882	-0.224924
919.07	247.262	17.7438	-2.6271	0.0639534	0.0155898	-0.222137
919.74	249.016	18.3941	-2.51604	0.0829135	0.0065349	-0.219203
920.41	250.776	19.0595	-2.40124	0.1023	-0.00253921	-0.216144
921.08	252.54	19.7394	-2.28291	0.12211	-0.0116875	-0.212966
921.76	254.308	20.4324	-2.1615	0.14233	-0.0209541	-0.209683
922.46	256.08	21.1387	-2.03696	0.162963	-0.0302769	-0.206295
923.18	257.857	21.8594	-1.9089	0.184021	-0.0396492	-0.202788
923.91	259.638	22.5933	-1.77772	0.205492	-0.0492077	-0.199176
924.6	261.422	23.3397	-1.64372	0.227366	-0.0590361	-0.195469
925.28	263.212	24.1004	-1.50625	0.249673	-0.0691412	-0.191644
925.94	265.006	24.8778	-1.36459	0.272453	-0.0795938	-0.187678
926.61	266.805	25.6738	-1.21819	0.295729	-0.0903188	-0.183554
927.27	268.611	26.4911	-1.06615	0.319544	-0.101268	-0.179242
927.95	270.423	27.3298	-0.908471	0.343901	-0.112546	-0.174742
928.64	272.241	28.1888	-0.745492	0.368792	-0.124179	-0.170064
929.36	274.066	29.0706	-0.57648	0.394252	-0.136094	-0.165185
930.08	275.897	29.9769	-0.400875	0.420312	-0.148269	-0.160086
930.82	277.734	30.9077	-0.218711	0.44697	-0.160711	-0.154768
931.57	279.579	31.8632	-0.0298855	0.47423	-0.173391	-0.149228
932.33	281.431	32.8436	0.165622	0.502095	-0.18641	-0.143465
933.09	283.289	33.8481	0.367602	0.530558	-0.199837	-0.137487
933.86	285.155	34.8792	0.576769	0.559652	-0.213626	-0.13127
934.63	287.029	35.9398	0.794105	0.589427	-0.227798	-0.124781
935.41	288.912	37.0308	1.01982	0.619892	-0.242235	-0.118014
936.16	290.805	38.1535	1.25435	0.651068	-0.25683	-0.110955
936.9	292.705	39.3067	1.49732	0.682945	-0.271625	-0.103615
937.66	294.613	40.4873	1.74773	0.715482	-0.286577	-0.0960276
938.38	296.528	41.6953	2.00551	0.748682	-0.301718	-0.0881938
939.09	298.448	42.9294	2.27027	0.782534	-0.317084	-0.0801259
939.77	300.374	44.1892	2.54188	0.817034	-0.332591	-0.0718287
940.45	302.306	45.4756	2.82058	0.852193	-0.348211	-0.0632939
941.13	304.243	46.7865	3.10573	0.887989	-0.364087	-0.0545422
941.81	306.184	48.1199	3.39669	0.924397	-0.380298	-0.0455945
942.51	308.13	49.4783	3.69421	0.961453	-0.396827	-0.0364259
943.23	310.082	50.8649	3.99929	0.999206	-0.413731	-0.0270041
943.97	312.04	52.2809	4.31232	1.03767	-0.430904	-0.0173159
944.69	314.006	53.7292	4.63422	1.0769	-0.448264	-0.00733159
945.38	315.978	55.2087	4.9646	1.11688	-0.465906	0.00293667
946.06	317.955	56.7163	5.30247	1.15756	-0.483831	0.0134565
946.73	319.938	58.2537	5.64837	1.19898	-0.501477	0.024246
947.41	321.926	59.8218	6.00256	1.24114	-0.518444	0.0353134
948.08	323.919	61.4181	6.36451	1.28411	-0.534716	0.0466383
948.78	325.917	63.0407	6.73392	1.32795	-0.549995	0.0582058
949.49	327.918	64.6871	7.11022	1.37271	-0.564497	0.069994
950.25	329.921	66.3533	7.49249	1.41844	-0.578364	0.0819686
951.02	331.926	68.0396	7.88096	1.46518	-0.591145	0.0941345
951.79	333.933	69.7474	8.27607	1.51296	-0.602695	0.106506
952.56	335.942	71.474	8.67731	1.56188	-0.613358	0.119062
953.33	337.953	73.2174	9.08443	1.612	-0.623253	0.131788
954.08	339.963	74.977	9.49718	1.66332	-0.632296	0.144676
954.84	341.973	76.7511	9.915	1.71582	-0.640593	0.15771
955.59	343.983	78.5389	10.3378	1.76954	-0.647676	0.170884
956.35	345.991	80.3405	10.7655	1.82446	-0.653191	0.184196
957.11	347.998	82.1528	11.1975	1.88066	-0.657342	0.197622
957.88	350.001	83.9722	11.6332	1.93825	-0.660022	0.211134
958.63	352	85.7971	12.072	1.99723	-0.661654	0.224716
959.34	353.994	87.6249	12.5136	2.05766	-0.662644	0.238345
960.04	355.984	89.4571	12.9582	2.11955	-0.662776	0.252037
960.73	357.97	91.2973	13.4068	2.18289	-0.662183	0.265825
961.41	359.952	93.1455	13.8596	2.24774	-0.660734	0.279711
962.1	361.931	95.0033	14.317	2.31411	-0.658264	0.293712
962.8	363.907	96.8705	14.7791	2.38203	-0.655068	0.307826
963.52	365.878	98.7449	15.2452	2.45152	-0.651231	0.322034
964.25	367.845	100.629	15.716	2.52259	-0.646123	0.336356
964.98	369.809	102.524	16.192	2.59525	-0.63937	0.35081
965.68	371.769	104.427	16.6725	2.66956	-0.631021	0.365366
966.37	373.722	106.333	17.1566	2.74564	-0.620801	0.37999
967.05	375.668	108.24	17.6437	2.82354	-0.609111	0.39466
967.73	377.606	110.144	18.1329	2.90333	-0.596248	0.409339
968.41	379.535	112.046	18.6246	2.98505	-0.581781	0.424037
969.11	381.457	113.948	19.1197	3.0687	-0.565669	0.438786
969.83	383.37	115.849	19.6175	3.15434	-0.548397	0.453562
970.56	385.275	117.746	20.1178	3.24205	-0.530194	0.468353
971.29	387.17	119.64	20.6207	3.33179	-0.51112	0.483165
972.01	389.056	121.531	21.126	3.42353	-0.491435	0.497992
972.73	390.932	123.42	21.6339	3.51726	-0.470756	0.512844
973.45	392.8	125.31	22.1449	3.61292	-0.448847	0.52774
974.19	394.657	127.198	22.6586	3.71056	-0.426085	0.542662
974.95	396.504	129.082	23.1743	3.81023	-0.402508	0.557589
975.69	398.34	130.962	23.6921	3.91192	-0.37791	0.572523
976.42	400.165	132.839	24.2119	4.01559	-0.352259	0.58746
977.15	401.979	134.711	24.7337	4.12131	-0.325512	0.6024
977.86	403.781	136.58	25.258	4.22908	-0.297565	0.617358
978.59	405.572	138.446	25.7845	4.33895	-0.268726	0.632328
979.32	407.351	140.308	26.3135	4.45098	-0.239193	0.647306
980.04	409.119	142.166	26.8448	4.56515	-0.20882	0.6623
980.74	410.874	144.022	27.3786	4.68138	-0.177665	0.677311
981.43	412.617	145.875	27.9149	4.79971	-0.145157	0.692344
982.12	414.348	147.727	28.454	4.92012	-0.11081	0.707407
982.82	416.066	149.575	28.9952	5.04271	-0.0747555	0.722475
983.53	417.77	151.414	29.5378	5.16761	-0.0367528	0.737511
984.28	419.458	153.242	30.0813	5.29487	0.00304856	0.752498
985.04	421.129	155.055	30.6249	5.42458	0.0444976	0.767406
985.76	422.783	156.852	31.1685	5.55679	0.0880137	0.782227
986.46	424.419	158.634	31.7124	5.69151	0.133744	0.796968
987.15	426.037	160.396	32.2558	5.82887	0.181135	0.811598
987.83	427.635	162.137	32.7981	5.96896	0.229907	0.826092
988.52	429.213	163.856	33.3394	6.11176	0.280153	0.840456
989.2	430.772	165.555	33.88	6.25722	0.331664	0.854699
989.89	432.31	167.234	34.4198	6.40533	0.384936	0.868823
990.57	433.829	168.895	34.9591	6.55605	0.440344	0.882841
991.27	435.327	170.535	35.4975	6.70948	0.497529	0.89673
991.97	436.803	172.149	36.0339	6.86575	0.556534	0.910449
992.69	438.256	173.737	36.5683	7.02485	0.616881	0.923999
993.39	439.686	175.298	37.1006	7.18682	0.678078	0.937373
994.08	441.092	176.834	37.6313	7.35166	0.740291	0.950587
994.77	442.478	178.35	38.1615	7.51932	0.803325	0.963685
995.45	443.843	179.846	38.6915	7.68984	0.867198	0.976676
996.14	445.187	181.325	39.2218	7.86323	0.931978	0.989578
996.84	446.511	182.788	39.7529	8.03948	0.997299	1.00241
997.55	447.814	184.237	40.2849	8.21857	1.06298	1.01517
998.29	449.099	185.674	40.8187	8.40047	1.12963	1.0279
999.05	450.365	187.104	41.3552	8.58516	1.19758	1.04063
999.8	451.613	188.524	41.894	8.77269	1.26667	1.05334
1000.5	452.841	189.931	42.4344	8.96317	1.33711	1.066
1001.2	454.048	191.325	42.9764	9.15663	1.40839	1.07862
1001.9	455.233	192.702	43.5195	9.35313	1.48008	1.09117
1002.6	456.398	194.067	44.0645	9.55266	1.55257	1.10368
1003.3	457.545	195.425	44.6127	9.75517	1.6258	1.1162
1004	458.672	196.774	45.1641	9.9607	1.69997	1.12872
1004.7	459.78	198.117	45.7189	10.1693	1.77537	1.14126
1005.4	460.868	199.452	46.277	10.3809	1.85181	1.15381
1006	461.936	200.776	46.8378	10.5957	1.92934	1.16634
1006.7	462.983	202.092	47.4014	10.8135	2.00801	1.17887
1007.3	464.009	203.398	47.9679	11.0345	2.0878	1.19139
1008	465.014	204.694	48.5371	11.2586	2.16884	1.2039
1008.6	465.997	205.979	49.1089	11.4858	2.25122	1.21639
1009.3	466.957	207.251	49.683	11.7163	2.33447	1.22885
1010	467.894	208.509	50.2588	11.95	2.41829	1.24125
1010.7	468.807	209.755	50.8372	12.187	2.50275	1.25364
1011.3	469.7	210.996	51.4195	12.4271	2.58768	1.26605
1012	470.572	212.232	52.0061	12.6705	2.67335	1.27851
1012.6	471.424	213.466	52.5978	12.9171	2.75999	1.29104
1013.3	472.257	214.699	53.1947	13.1669	2.84728	1.30363
1013.9	473.068	215.928	53.7961	13.4199	2.93518	1.31628
1014.6	473.858	217.156	54.4026	13.6762	3.02442	1.32899
1015.3	474.629	218.384	55.0148	13.9357	3.11542	1.3418
1016	475.377	219.61	55.6319	14.1986	3.20823	1.35466
1016.7	476.103	220.827	56.2529	14.4649	3.30321	1.36755
1017.4	476.804	222.033	56.877	14.7347	3.39997	1.38042
1018.2	477.477	223.221	57.503	15.0082	3.49827	1.39323
1019	478.123	224.391	58.131	15.2854	3.59866	1.40597
1019.7	478.743	225.547	58.7617	15.5663	3.70128	1.41869
1020.4	479.335	226.683	59.394	15.8509	3.80573	1.43132
1021.1	479.896	227.796	60.0274	16.1395	3.91191	1.44385
1021.7	480.428	228.885	60.6618	16.4319	4.01986	1.45628
1022.4	480.929	229.951	61.2971	16.7283	4.12942	1.46861
1023	481.399	230.994	61.9334	17.0287	4.24113	1.48082
1023.6	481.839	232.014	62.571	17.333	4.35534	1.49294
1024.2	482.247	233.007	63.2089	17.6413	4.47182	1.50493
1024.8	482.62	233.967	63.8459	17.9538	4.59068	1.51673
1025.5	482.957	234.893	64.4816	18.2706	4.71131	1.52833
1026.1	483.258	235.781	65.1155	18.5917	4.83316	1.53972
1026.7	483.523	236.634	65.7482	18.9171	4.95646	1.5509
1027.3	483.755	237.459	66.3815	19.2467	5.08098	1.56196
1028	483.952	238.258	67.0155	19.5806	5.20688	1.57288
1028.6	484.117	239.032	67.6509	19.9187	5.33437	1.58371
1029.2	484.249	239.784	68.2882	20.261	5.463	1.59445
1029.8	484.348	240.511	68.9269	20.6076	5.59263	1.60508
1030.4	484.414	241.218	69.5681	20.9585	5.724	1.61565
1031.1	484.45	241.909	70.2129	21.3136	5.85753	1.6262
1031.7	484.452	242.581	70.8603	21.6731	5.99313	1.63669
1032.3	484.42	243.225	71.509	22.0369	6.1311	1.64706
1033	484.351	243.84	72.1583	22.4054	6.27088	1.65729
1033.6	484.243	244.419	72.807	22.7784	6.41207	1.66733
1034.3	484.098	244.965	73.4559	23.1562	6.55515	1.67721
1035	483.916	245.486	74.1066	23.5385	6.70013	1.68698
1035.8	483.698	245.977	74.7583	23.9255	6.84634	1.69662
1036.5	483.441	246.438	75.4108	24.3172	6.99346	1.70612
1037.1	483.149	246.87	76.0643	24.7133	7.14134	1.71555
1037.8	482.823	247.275	76.7183	25.1135	7.28962	1.72499
1038.4	482.466	247.657	77.3733	25.5175	7.43872	1.73451
1039	482.082	248.019	78.0298	25.9248	7.58889	1.74422
1039.6	481.669	248.361	78.6872	26.3354	7.73961	1.75414
1040.2	481.229	248.679	79.3448	26.7492	7.89076	1.76425
1040.8	480.762	248.975	80.0025	27.1659	8.04257	1.77464
1041.4	480.272	249.251	80.6599	27.5852	8.19502	1.78539
1042	479.758	249.507	81.3173	28.007	8.34812	1.7965
1042.6	479.222	249.748	81.9759	28.4312	8.50194	1.80803
1043.2	478.665	249.975	82.6355	28.8579	8.65604	1.82
1043.7	478.086	250.188	83.2966	29.287	8.8101	1.83241
1044.3	477.489	250.39	83.959	29.7181	8.96425	1.84536
1045	476.876	250.583	84.6226	30.1506	9.11837	1.85896
1045.5	476.251	250.771	85.2878	30.5845	9.27313	1.87328
1046.1	475.614	250.957	85.9549	31.0194	9.42909	1.88838
1046.7	474.965	251.138	86.6234	31.4554	9.58602	1.90425
1047.3	474.3	251.308	87.2926	31.8929	9.74418	1.92079
1047.9	473.619	251.466	87.962	32.3318	9.90331	1.93802
1048.5	472.922	251.61	88.631	32.7721	10.0632	1.95593
1049.1	472.208	251.738	89.2995	33.2138	10.2242	1.97452
1049.7	471.48	251.855	89.9682	33.6567	10.3866	1.99386
1050.3	470.734	251.957	90.6364	34.1011	10.5495	2.0139
1050.9	469.97	252.041	91.3037	34.547	10.7125	2.03459
1051.5	469.191	252.11	91.9703	34.9941	10.8758	2.05606
1052.2	468.402	252.17	92.6361	35.4416	11.0388	2.07845
1052.9	467.604	252.221	93.3014	35.8894	11.2023	2.10182
1053.5	466.802	252.27	93.9664	36.3367	11.3667	2.12632
1054.2	465.996	252.314	94.6307	36.7838	11.5313	2.15194
1054.8	465.181	252.348	95.2936	37.2308	11.6963	2.17859
1055.4	464.362	252.375	95.955	37.6773	11.8619	2.20638
1056	463.539	252.395	96.6148	38.1232	12.0283	2.23537
1056.6	462.713	252.409	97.2733	38.5686	12.1955	2.26552
1057.1	461.881	252.419	97.9312	39.0135	12.3639	2.29685
1057.7	461.044	252.424	98.5886	39.4583	12.533	2.32932
1058.3	460.198	252.422	99.2458	39.9032	12.7027	2.36285
1058.8	459.346	252.415	99.9031	40.3481	12.8732	2.39752
1059.4	458.489	252.407	100.56	40.7925	13.0445	2.43342
1059.9	457.628	252.397	101.218	41.2367	13.2166	2.47051
1060.5	456.761	252.388	101.877	41.6807	13.3896	2.50881
1061	455.89	252.379	102.537	42.1244	13.5634	2.54834
1061.6	455.013	252.367	103.197	42.568	13.7379	2.58908
1062.2	454.13	252.351	103.857	43.0112	13.9134	2.63106
1062.7	453.244	252.333	104.516	43.4539	14.0899	2.67431
1063.3	452.352	252.311	105.176	43.8963	14.2674	2.71882
1063.8	451.453	252.288	105.837	44.3386	14.446	2.76455
1064.4	450.547	252.262	106.498	44.781	14.6252	2.8115
1064.9	449.632	252.232	107.16	45.2234	14.8044	2.85966
1065.5	448.713	252.201	107.823	45.6655	14.9839	2.90911
1066	447.794	252.173	108.486	46.1065	15.1633	2.96004
1066.6	446.877	252.149	109.149	46.5462	15.3429	3.0125
1067.2	445.965	252.134	109.813	46.984	15.5228	3.06661
1067.7	445.06	252.128	110.477	47.4198	15.7027	3.12242
1068.3	444.162	252.129	111.142	47.8536	15.8824	3.17993
1068.9	443.274	252.141	111.806	48.2847	16.0624	3.23926
1069.5	442.399	252.165	112.47	48.7127	16.2429	3.30054
1070.2	441.538	252.203	113.133	49.1378	16.4238	3.36373
1070.8	440.687	252.253	113.798	49.5603	16.6054	3.42879
1071.4	439.846	252.317	114.463	49.9802	16.7872	3.49572
1072	439.014	252.392	115.129	50.3979	16.9689	3.56447
1072.6	438.193	252.483	115.795	50.8129	17.1507	3.63513
1073.1	437.389	252.592	116.463	51.2245	17.3327	3.70788
1073.7	436.601	252.72	117.131	51.6327	17.5155	3.78272
1074.2	435.831	252.868	117.801	52.0373	17.6999	3.85968
1074.8	435.076	253.034	118.471	52.4387	17.8855	3.93872
1075.3	434.331	253.21	119.141	52.8373	18.0728	4.01972
1075.8	433.596	253.396	119.81	53.2332	18.2617	4.10266
1076.3	432.869	253.588	120.479	53.6264	18.452	4.18753
1076.9	432.148	253.783	121.146	54.0173	18.6442	4.27426
1077.4	431.432	253.981	121.812	54.406	18.8386	4.36284
1077.9	430.717	254.179	122.477	54.7928	19.0346	4.45318
1078.4	430	254.369	123.14	55.1783	19.2316	4.54518
1079	429.282	254.556	123.801	55.5622	19.4299	4.6389
1079.5	428.568	254.74	124.46	55.9438	19.6293	4.73449
1080	427.857	254.924	125.117	56.3232	19.8305	4.83195
1080.6	427.152	255.109	125.772	56.6999	20.034	4.93138
1081.1	426.451	255.29	126.424	57.0743	20.2393	5.0327
1081.6	425.747	255.46	127.072	57.4472	20.4465	5.13575
1082.2	425.041	255.62	127.718	57.8182	20.6554	5.24058
1082.7	424.332	255.768	128.359	58.1874	20.8655	5.34719
1083.2	423.621	255.904	128.996	58.5548	21.0769	5.45558
1083.7	422.911	256.032	129.631	58.9202	21.2898	5.56584
1084.3	422.199	256.153	130.262	59.2836	21.504	5.67796
1084.8	421.486	256.264	130.89	59.6452	21.7197	5.79191
1085.3	420.772	256.369	131.516	60.0049	21.9365	5.90776
1085.9	420.06	256.467	132.138	60.3623	22.1545	6.02554
1086.5	419.348	256.559	132.757	60.7175	22.3742	6.14529
1087.1	418.641	256.649	133.374	61.0701	22.5962	6.26709
1087.6	417.934	256.733	133.988	61.4206	22.8204	6.39085
1088.2	417.222	256.802	134.598	61.7694	23.0469	6.51644
1088.8	416.504	256.856	135.204	62.1168	23.2755	6.64384
1089.4	415.777	256.887	135.805	62.4629	23.5058	6.77296
1089.9	415.04	256.898	136.401	62.808	23.7382	6.90382
1090.4	414.296	256.892	136.993	63.1516	23.9728	7.0365
1091	413.542	256.865	137.581	63.4941	24.2088	7.17093
1091.5	412.775	256.814	138.163	63.8358	24.4457	7.30706
1092	412.001	256.743	138.741	64.176	24.6834	7.44503
1092.5	411.224	256.657	139.314	64.5142	24.9215	7.58498
1093	410.448	256.56	139.883	64.8497	25.1605	7.72705
1093.5	409.678	256.459	140.447	65.1819	25.4008	7.87141
1094	408.914	256.352	141.007	65.5108	25.6416	8.01808
1094.5	408.155	256.235	141.562	65.8365	25.8829	8.16701
1095	407.404	256.114	142.112	66.1584	26.1251	8.31833
1095.5	406.666	255.992	142.658	66.476	26.3682	8.47219
1096	405.94	255.868	143.199	66.7894	26.6124	8.62858
1096.5	405.227	255.743	143.735	67.0984	26.8577	8.78753
1097	404.526	255.618	144.266	67.4032	27.1036	8.94904
1097.5	403.836	255.49	144.793	67.7038	27.3497	9.11308
1098	403.162	255.365	145.316	67.9997	27.5962	9.27981
1098.5	402.51	255.248	145.834	68.2899	27.843	9.44944
1099	401.881	255.141	146.348	68.5743	28.091	9.622
1099.5	401.279	255.048	146.858	68.8525	28.3408	9.79761
1100	400.701	254.964	147.363	69.1248	28.5921	9.97619
1100.5	400.139	254.88	147.863	69.392	28.8453	10.1575
1101	399.593	254.796	148.357	69.6543	29.1002	10.3417
1101.5	399.059	254.707	148.845	69.9118	29.3565	10.5285
1102	398.538	254.611	149.328	70.1647	29.6148	10.7181
1102.5	398.029	254.51	149.804	70.4128	29.8752	10.9104
1103	397.529	254.399	150.273	70.6566	30.137	11.1053
1103.6	397.033	254.271	150.735	70.8967	30.3996	11.3027
1104.1	396.545	254.132	151.19	71.1324	30.6631	11.5028
1104.7	396.073	253.989	151.639	71.3629	30.9272	11.7058
1105.2	395.619	253.844	152.081	71.5877	31.1926	11.9118
1105.8	395.19	253.703	152.516	71.8061	31.4598	12.1209
1106.3	394.781	253.564	152.945	72.0184	31.7282	12.3331
1106.8	394.387	253.416	153.367	72.2253	31.9979	12.5482
1107.3	394.011	253.264	153.781	72.4266	32.2683	12.7664
1107.8	393.655	253.108	154.187	72.6218	32.5388	12.9876
1108.3	393.315	252.948	154.587	72.8116	32.8096	13.2117
1108.8	392.991	252.787	154.98	72.9963	33.0805	13.4386
1109.3	392.681	252.622	155.366	73.1767	33.3515	13.668
1109.8	392.379	252.451	155.747	73.3537	33.6224	13.8998
1110.3	392.087	252.277	156.122	73.527	33.893	14.1337
1110.7	391.809	252.103	156.492	73.6964	34.1629	14.3701
1111.2	391.543	251.931	156.856	73.8624	34.4329	14.6086
1111.7	391.288	251.761	157.216	74.0255	34.7034	14.8491
1112.1	391.043	251.593	157.571	74.1858	34.9741	15.0915
1112.6	390.803	251.421	157.922	74.3438	35.2452	15.3359
1113.1	390.568	251.244	158.267	74.4995	35.5162	15.582
1113.6	390.338	251.062	158.606	74.6532	35.7865	15.8299
1114	390.109	250.873	158.941	74.8053	36.0566	16.0794
1114.5	389.879	250.679	159.271	74.9568	36.3263	16.3302
1115	389.647	250.479	159.597	75.108	36.5957	16.5822
1115.5	389.408	250.271	159.919	75.2595	36.8652	16.8352
1115.9	389.166	250.057	160.237	75.411	37.1345	17.0892
1116.4	388.926	249.841	160.551	75.5615	37.4035	17.3447
1116.9	388.69	249.623	160.86	75.7109	37.6723	17.6015
1117.4	388.46	249.41	161.165	75.8589	37.941	17.8597
1117.8	388.237	249.198	161.466	76.0054	38.2095	18.1194
1118.3	388.017	248.987	161.763	76.1509	38.478	18.3804
1118.8	387.804	248.778	162.056	76.2949	38.7458	18.6428
1119.3	387.601	248.574	162.344	76.4369	39.0127	18.9068
1119.8	387.404	248.373	162.627	76.5777	39.2787	19.1722
1120.2	387.21	248.177	162.908	76.7182	39.5436	19.4385
1120.7	387.017	247.984	163.185	76.8591	39.8077	19.7057
1121.3	386.82	247.793	163.46	77.0014	40.071	19.9733
1121.8	386.621	247.606	163.733	77.1449	40.3332	20.2414
1122.3	386.426	247.427	164.002	77.2885	40.5943	20.5103
1122.8	386.232	247.256	164.27	77.433	40.8552	20.7798
1123.3	386.037	247.093	164.536	77.5788	41.1162	21.0497
1123.8	385.843	246.937	164.799	77.7256	41.3776	21.3202
1124.3	385.647	246.784	165.059	77.8736	41.6395	21.5911
1124.8	385.45	246.633	165.316	78.0224	41.9016	21.8626
1125.3	385.252	246.481	165.568	78.1716	42.1636	22.135
1125.8	385.053	246.328	165.816	78.3215	42.426	22.4079
1126.2	384.848	246.174	166.061	78.4729	42.6891	22.6814
1126.7	384.639	246.016	166.301	78.6256	42.9522	22.9553
1127.1	384.422	245.851	166.537	78.7797	43.2152	23.2298
1127.6	384.199	245.68	166.768	78.9352	43.478	23.5047
1128	383.973	245.506	166.995	79.0916	43.7406	23.7803
1128.5	383.743	245.33	167.217	79.2493	44.0034	24.0563
1128.9	383.51	245.153	167.435	79.4081	44.2669	24.3328
1129.4	383.275	244.973	167.648	79.568	44.5309	24.6099
1129.8	383.035	244.786	167.855	79.7289	44.7953	24.8876
1130.3	382.791	244.593	168.057	79.8905	45.0593	25.1659
1130.7	382.544	244.392	168.253	80.0527	45.3224	25.445
1131.2	382.292	244.185	168.444	80.2161	45.5848	25.7246
1131.7	382.033	243.973	168.63	80.3819	45.8461	26.0043
1132.2	381.763	243.757	168.811	80.5504	46.1064	26.2839
1132.7	381.48	243.535	168.989	80.7225	46.3661	26.5633
1133.2	381.185	243.309	169.164	80.8983	46.6244	26.8422
1133.7	380.877	243.079	169.335	81.0778	46.8813	27.1208
1134.2	380.555	242.847	169.503	81.2618	47.1376	27.3987
1134.6	380.216	242.615	169.67	81.4509	47.3937	27.6757
1135.1	379.862	242.38	169.833	81.6449	47.6495	27.9519
1135.6	379.49	242.138	169.993	81.8436	47.9053	28.2273
1136.1	379.102	241.89	170.149	82.047	48.1605	28.5021
1136.6	378.697	241.632	170.301	82.2545	48.4144	28.7763
1137.2	378.274	241.365	170.449	82.467	48.6677	29.0498
1137.7	377.83	241.092	170.594	82.6854	48.9203	29.3221
1138.2	377.364	240.811	170.736	82.9098	49.1724	29.5932
1138.7	376.874	240.52	170.874	83.1403	49.4244	29.8631
1139.2	376.364	240.221	171.009	83.3765	49.676	30.132
1139.8	375.84	239.918	171.14	83.6172	49.9273	30.4002
1140.3	375.304	239.612	171.267	83.8621	50.1784	30.6677
1140.8	374.758	239.307	171.39	84.1108	50.4295	30.9346
1141.3	374.206	239.003	171.508	84.3627	50.6806	31.2013
1141.8	373.647	238.698	171.622	84.6177	50.9318	31.4676
1142.3	373.085	238.394	171.731	84.8749	51.1828	31.7339
1142.7	372.526	238.093	171.835	85.1334	51.4331	32.0004
1143.2	371.967	237.796	171.933	85.3936	51.6828	32.2671
1143.7	371.406	237.503	172.026	85.6562	51.9319	32.5336
1144.2	370.844	237.215	172.115	85.9215	52.1807	32.7999
1144.6	370.278	236.931	172.199	86.1898	52.4294	33.0658
1145.1	369.712	236.654	172.279	86.4606	52.6777	33.3315
1145.6	369.153	236.387	172.353	86.7322	52.9257	33.5975
1146	368.602	236.131	172.422	87.0049	53.1734	33.8638
1146.5	368.06	235.888	172.487	87.2784	53.4207	34.1302
1146.9	367.526	235.657	172.546	87.5529	53.6677	34.397
1147.4	366.997	235.434	172.6	87.829	53.9146	34.6637
1147.9	366.473	235.219	172.648	88.1064	54.161	34.9306
1148.3	365.954	235.01	172.69	88.3851	54.4071	35.1977
1148.8	365.44	234.808	172.726	88.6653	54.6527	35.4648
1149.3	364.93	234.614	172.756	88.9471	54.898	35.7319
1149.7	364.423	234.425	172.78	89.2309	55.1429	35.9989
1150.2	363.916	234.239	172.799	89.5172	55.3878	36.2657
1150.7	363.413	234.06	172.811	89.8052	55.6326	36.5325
1151.2	362.921	233.891	172.816	90.0935	55.8772	36.7997
1151.6	362.443	233.734	172.815	90.3817	56.1216	37.0674
1152.1	361.983	233.591	172.807	90.6691	56.3659	37.3358
1152.6	361.541	233.463	172.791	90.9555	56.61	37.605
1153	361.113	233.346	172.768	91.2418	56.8541	37.8747
1153.5	360.703	233.241	172.738	91.5271	57.0975	38.1452
1154	360.314	233.15	172.699	91.8109	57.3397	38.4166
1154.4	359.941	233.073	172.653	92.0941	57.5809	38.6887
1154.9	359.583	233.009	172.601	92.3779	57.8207	38.961
1155.4	359.233	232.957	172.542	92.6629	58.0593	39.2333
1155.9	358.888	232.915	172.477	92.9507	58.297	39.505
1156.4	358.548	232.885	172.406	93.2411	58.5333	39.7764
1156.9	358.216	232.868	172.329	93.5334	58.768	40.0474
1157.4	357.889	232.865	172.247	93.8288	59.0015	40.3178
1157.9	357.564	232.874	172.16	94.1281	59.234	40.5872
1158.4	357.24	232.897	172.068	94.431	59.4654	40.8557
1158.9	356.918	232.931	171.97	94.7379	59.6959	41.1233
1159.3	356.597	232.977	171.867	95.0486	59.925	41.39
1159.8	356.28	233.034	171.759	95.3627	60.1523	41.6558
1160.3	355.961	233.102	171.645	95.6814	60.3781	41.9204
1160.7	355.635	233.181	171.526	96.0061	60.6022	42.1834
1161.2	355.302	233.269	171.403	96.3371	60.8252	42.4446
1161.7	354.958	233.365	171.277	96.6749	61.0474	42.7038
1162.1	354.607	233.472	171.145	97.019	61.2686	42.9612
1162.5	354.257	233.593	171.009	97.3676	61.4891	43.2173
1163	353.91	233.729	170.867	97.7205	61.7086	43.4723
1163.4	353.57	233.882	170.719	98.0769	61.9271	43.7262
1163.9	353.238	234.054	170.566	98.4366	62.1448	43.9793
1164.3	352.913	234.242	170.407	98.7999	62.3619	44.2314
1164.7	352.6	234.45	170.241	99.1657	62.5777	44.4828
1165.2	352.304	234.679	170.069	99.5328	62.792	44.7338
1165.6	352.022	234.929	169.89	99.9024	63.0048	44.9842
1166.1	351.747	235.198	169.705	100.276	63.2158	45.2335
1166.5	351.476	235.487	169.515	100.654	63.4254	45.4813
1166.9	351.205	235.792	169.321	101.038	63.6341	45.7272
1167.4	350.937	236.117	169.121	101.427	63.8413	45.9715
1167.8	350.68	236.464	168.916	101.82	64.047	46.2147
1168.3	350.431	236.833	168.705	102.217	64.252	46.4565
1168.7	350.189	237.224	168.488	102.619	64.4567	46.6969
1169.2	349.955	237.636	168.267	103.025	64.6611	46.9359
1169.6	349.726	238.065	168.04	103.434	64.8656	47.1737
1170.1	349.502	238.51	167.809	103.848	65.0697	47.4104
1170.5	349.286	238.969	167.572	104.263	65.2734	47.6465
1171	349.075	239.44	167.331	104.681	65.477	47.8819
1171.4	348.865	239.923	167.086	105.103	65.6808	48.1162
1171.8	348.656	240.415	166.837	105.527	65.8844	48.3496
1172.3	348.444	240.912	166.584	105.955	66.0877	48.5822
1172.7	348.233	241.416	166.327	106.385	66.2908	48.8141
1173.2	348.026	241.929	166.066	106.817	66.4936	49.0456
1173.7	347.824	242.45	165.801	107.25	66.6965	49.2767
1174.1	347.63	242.982	165.532	107.684	66.9	49.5075
1174.6	347.441	243.522	165.258	108.12	67.1038	49.7383
1175.1	347.256	244.064	164.981	108.555	67.308	49.9691
1175.5	347.077	244.61	164.701	108.99	67.5121	50.2001
1176	346.905	245.158	164.416	109.424	67.7153	50.4317
1176.5	346.737	245.708	164.128	109.858	67.9181	50.6635
1177	346.572	246.262	163.837	110.293	68.12	50.8953
1177.4	346.407	246.819	163.543	110.728	68.3214	51.1268
1177.9	346.239	247.377	163.247	111.166	68.5225	51.3579
1178.3	346.07	247.937	162.948	111.604	68.7227	51.5885
1178.8	345.9	248.5	162.646	112.044	68.9221	51.8189
1179.2	345.729	249.065	162.342	112.486	69.1212	52.0488
1179.6	345.555	249.634	162.037	112.93	69.3207	52.278
1180.1	345.378	250.205	161.729	113.375	69.5204	52.5068
1180.5	345.196	250.772	161.42	113.821	69.7206	52.7354
1180.9	345.01	251.334	161.109	114.268	69.9208	52.964
1181.3	344.82	251.89	160.797	114.714	70.1205	53.1931
1181.8	344.624	252.437	160.484	115.159	70.3204	53.4223
1182.2	344.42	252.977	160.17	115.606	70.5203	53.6513
1182.6	344.207	253.509	159.856	116.053	70.7198	53.8804
1183	343.984	254.029	159.541	116.5	70.9189	54.1095
1183.4	343.753	254.541	159.227	116.948	71.1173	54.3387
1183.8	343.518	255.047	158.911	117.395	71.3148	54.5682
1184.3	343.281	255.548	158.594	117.842	71.5119	54.7978
1184.7	343.044	256.049	158.276	118.288	71.7086	55.0275
1185.1	342.808	256.548	157.957	118.734	71.9047	55.2574
1185.5	342.572	257.043	157.636	119.178	72.1002	55.4878
1186	342.34	257.538	157.314	119.621	72.2951	55.7186
1186.4	342.114	258.033	156.99	120.062	72.4893	55.9501
1186.8	341.894	258.528	156.665	120.502	72.683	56.182
1187.2	341.676	259.023	156.338	120.94	72.8762	56.4143
1187.7	341.461	259.516	156.011	121.377	73.0686	56.6469
1188.1	341.246	260.008	155.683	121.813	73.26	56.8798
1188.5	341.035	260.499	155.353	122.247	73.4506	57.113
1188.9	340.831	260.994	155.023	122.681	73.6403	57.3466
1189.3	340.635	261.493	154.69	123.112	73.8296	57.5806
1189.8	340.446	261.997	154.357	123.542	74.019	57.8148
1190.2	340.265	262.504	154.022	123.971	74.2084	58.0494
1190.6	340.088	263.008	153.687	124.397	74.3979	58.2848
1191	339.915	263.508	153.352	124.82	74.5875	58.521
1191.5	339.746	264.002	153.016	125.239	74.777	58.7582
1191.9	339.579	264.487	152.681	125.655	74.9666	58.9966
1192.3	339.414	264.965	152.346	126.068	75.1567	59.236
1192.8	339.249	265.431	152.012	126.477	75.3465	59.4766
1193.2	339.081	265.881	151.68	126.881	75.5359	59.7186
1193.7	338.913	266.319	151.349	127.282	75.725	59.9619
1194.2	338.75	266.747	151.018	127.678	75.9134	60.2067
1194.6	338.591	267.168	150.689	128.069	76.1017	60.4528
1195.1	338.441	267.583	150.359	128.456	76.2903	60.7003
1195.5	338.297	267.992	150.03	128.837	76.4787	60.9492
1196	338.157	268.387	149.703	129.214	76.6671	61.2
1196.4	338.022	268.77	149.376	129.584	76.8547	61.4525
1196.9	337.894	269.143	149.051	129.948	77.0409	61.707
1197.4	337.771	269.504	148.727	130.307	77.226	61.9631
1197.9	337.651	269.857	148.405	130.661	77.4096	62.2204
1198.4	337.533	270.202	148.084	131.011	77.5917	62.4787
1198.9	337.414	270.536	147.764	131.358	77.7725	62.7379
1199.4	337.296	270.863	147.447	131.703	77.9515	62.9977
1199.9	337.178	271.185	147.131	132.044	78.1284	63.2582
1200.3	337.062	271.502	146.816	132.384	78.3039	63.5189
1200.8	336.945	271.818	146.503	132.723	78.4784	63.7795
1201.3	336.827	272.13	146.191	133.06	78.6517	64.0402
1201.8	336.706	272.435	145.881	133.395	78.824	64.3011
1202.2	336.582	272.733	145.574	133.729	78.9947	64.5623
1202.7	336.456	273.022	145.269	134.06	79.1632	64.8239
1203.2	336.325	273.303	144.966	134.389	79.3299	65.0856
1203.7	336.188	273.579	144.666	134.719	79.4948	65.3468
1204.1	336.044	273.85	144.369	135.048	79.6581	65.6076
1204.6	335.89	274.113	144.074	135.378	79.8203	65.8678
1205.1	335.73	274.371	143.783	135.708	79.9809	66.1274
1205.6	335.564	274.624	143.494	136.037	80.1402	66.3868
1206.1	335.395	274.872	143.208	136.365	80.2982	66.6459
1206.6	335.224	275.118	142.924	136.692	80.4546	66.9047
1207.1	335.05	275.361	142.643	137.019	80.6099	67.1633
1207.6	334.873	275.6	142.364	137.344	80.7639	67.4217
1208.1	334.695	275.834	142.089	137.668	80.9161	67.6799
1208.6	334.516	276.064	141.817	137.989	81.0661	67.9383
1209.2	334.336	276.292	141.547	138.309	81.214	68.1965
1209.7	334.152	276.518	141.281	138.63	81.3595	68.4539
1210.2	333.962	276.744	141.018	138.951	81.5029	68.7104
1210.8	333.765	276.97	140.758	139.274	81.6446	68.9656
1211.3	333.562	277.197	140.501	139.598	81.7841	69.2195
1211.9	333.355	277.426	140.247	139.922	81.9213	69.4724
1212.4	333.143	277.657	139.997	140.249	82.0571	69.724
1212.9	332.926	277.891	139.749	140.577	82.1918	69.9742
1213.4	332.704	278.127	139.506	140.906	82.3256	70.2231
1213.9	332.476	278.361	139.266	141.235	82.4589	70.4712
1214.4	332.241	278.59	139.031	141.564	82.5911	70.7186
1214.9	332.001	278.811	138.8	141.891	82.722	70.9659
1215.4	331.755	279.024	138.574	142.217	82.8521	71.2129
1215.9	331.5	279.23	138.354	142.542	82.9816	71.4594
1216.4	331.238	279.425	138.139	142.865	83.1101	71.7058
1216.9	330.967	279.607	137.93	143.185	83.2374	71.9521
1217.4	330.687	279.777	137.726	143.504	83.3635	72.1985
1217.8	330.4	279.935	137.529	143.82	83.4882	72.4449
1218.3	330.106	280.082	137.338	144.133	83.6122	72.6915
1218.8	329.806	280.219	137.152	144.444	83.7357	72.9379
1219.3	329.5	280.342	136.973	144.751	83.8586	73.1846
1219.8	329.185	280.449	136.801	145.055	83.9808	73.432
1220.2	328.864	280.537	136.636	145.353	84.1018	73.6802
1220.7	328.537	280.607	136.478	145.646	84.2207	73.9295
1221.2	328.202	280.658	136.327	145.935	84.3379	74.1794
1221.7	327.859	280.695	136.184	146.22	84.453	74.4295
1222.2	327.505	280.719	136.048	146.503	84.5662	74.6795
1222.6	327.141	280.729	135.919	146.785	84.6778	74.9292
1223.1	326.765	280.727	135.798	147.064	84.7872	75.1785
1223.5	326.378	280.713	135.684	147.342	84.8941	75.4274
1224	325.98	280.689	135.578	147.618	84.9995	75.6756
1224.5	325.569	280.657	135.479	147.895	85.1038	75.9226
1224.9	325.146	280.615	135.387	148.172	85.2069	76.1688
1225.4	324.71	280.558	135.304	148.446	85.309	76.4146
1225.8	324.262	280.485	135.23	148.717	85.4096	76.6603
1226.3	323.801	280.393	135.164	148.985	85.5081	76.9062
1226.7	323.327	280.282	135.108	149.25	85.6051	77.1522
1227.2	322.838	280.157	135.06	149.513	85.7004	77.3975
1227.6	322.334	280.015	135.022	149.775	85.7946	77.6424
1228.1	321.815	279.856	134.993	150.034	85.8881	77.887
1228.6	321.282	279.68	134.973	150.291	85.9806	78.1312
1229.1	320.738	279.49	134.961	150.545	86.0723	78.375
1229.5	320.184	279.288	134.956	150.797	86.1634	78.6183
1230	319.622	279.077	134.957	151.048	86.2538	78.8607
1230.5	319.052	278.856	134.963	151.297	86.3438	79.1026
1231	318.475	278.624	134.976	151.543	86.4336	79.344
1231.5	317.893	278.381	134.994	151.786	86.5227	79.585
1232	317.309	278.13	135.016	152.026	86.6106	79.8257
1232.5	316.721	277.87	135.042	152.264	86.6976	80.0659
1233	316.129	277.604	135.073	152.499	86.7834	80.3051
1233.5	315.533	277.333	135.107	152.733	86.8686	80.5435
1234	314.932	277.055	135.146	152.966	86.9535	80.7807
1234.5	314.327	276.774	135.188	153.197	87.0378	81.0167
1235	313.723	276.492	135.232	153.427	87.1216	81.2516
1235.5	313.119	276.211	135.277	153.656	87.2047	81.4851
1236	312.516	275.931	135.323	153.885	87.2871	81.7171
1236.5	311.915	275.653	135.37	154.112	87.3689	81.9478
1237	311.313	275.371	135.419	154.337	87.4501	82.1773
1237.4	310.711	275.085	135.471	154.56	87.5307	82.4059
1237.9	310.109	274.794	135.525	154.781	87.6106	82.6336
1238.4	309.507	274.497	135.581	154.998	87.6898	82.8606
1238.9	308.904	274.197	135.639	155.214	87.7683	83.0866
1239.3	308.301	273.89	135.7	155.427	87.8464	83.3116
1239.8	307.696	273.575	135.764	155.636	87.9243	83.536
1240.3	307.09	273.254	135.83	155.843	88.0021	83.7595
1240.7	306.489	272.93	135.897	156.047	88.0799	83.982
1241.2	305.892	272.606	135.963	156.248	88.1574	84.2035
1241.6	305.302	272.284	136.028	156.448	88.2347	84.4237
1242.1	304.72	271.964	136.091	156.644	88.3119	84.6428
1242.6	304.143	271.641	136.154	156.837	88.3891	84.861
1243	303.574	271.317	136.215	157.027	88.4655	85.0782
1243.5	303.014	270.994	136.274	157.214	88.5408	85.2945
1244	302.461	270.671	136.332	157.397	88.615	85.5097
1244.4	301.914	270.349	136.388	157.578	88.6876	85.7236
1244.9	301.372	270.028	136.445	157.757	88.7591	85.9361
1245.3	300.831	269.705	136.501	157.934	88.8298	86.147
1245.8	300.294	269.382	136.558	158.109	88.899	86.3564
1246.2	299.761	269.062	136.613	158.283	88.9667	86.564
1246.6	299.23	268.744	136.669	158.456	89.0333	86.7697
1247.1	298.702	268.43	136.724	158.628	89.0989	86.9733
1247.5	298.176	268.118	136.779	158.799	89.1636	87.1749
1248	297.652	267.807	136.834	158.969	89.2276	87.3746
1248.4	297.131	267.497	136.889	159.138	89.2902	87.5724
1248.8	296.612	267.188	136.944	159.305	89.3512	87.7684
1249.3	296.095	266.879	136.999	159.471	89.4108	87.9625
1249.7	295.578	266.571	137.055	159.636	89.4689	88.1543
1250.1	295.06	266.264	137.111	159.801	89.5261	88.344
1250.6	294.539	265.957	137.17	159.965	89.583	88.5314
1251	294.019	265.65	137.229	160.128	89.6393	88.7165
1251.5	293.502	265.348	137.286	160.291	89.6953	88.8993
1252	292.99	265.052	137.342	160.453	89.7509	89.0797
1252.4	292.485	264.763	137.394	160.615	89.8059	89.2576
1252.9	291.988	264.482	137.443	160.776	89.8607	89.433
1253.4	291.499	264.209	137.488	160.936	89.9155	89.606
1253.8	291.02	263.945	137.529	161.095	89.9696	89.7764
1254.3	290.554	263.693	137.564	161.254	90.0225	89.9444
1254.8	290.099	263.451	137.594	161.412	90.0745	90.1097
1255.3	289.653	263.219	137.619	161.57	90.1251	90.2722
1255.8	289.214	262.999	137.639	161.727	90.1751	90.4317
1256.3	288.782	262.787	137.657	161.886	90.2247	90.5883
1256.8	288.357	262.587	137.67	162.044	90.2736	90.7417
1257.3	287.944	262.4	137.677	162.203	90.3217	90.892
1257.7	287.542	262.228	137.678	162.363	90.369	91.0391
1258.2	287.151	262.07	137.673	162.523	90.4151	91.1829
1258.7	286.769	261.925	137.663	162.684	90.4603	91.3234
1259.2	286.396	261.79	137.648	162.844	90.5045	91.4611
1259.7	286.03	261.663	137.63	163.004	90.5476	91.5959
1260.1	285.673	261.542	137.609	163.162	90.5895	91.7281
1260.6	285.322	261.426	137.585	163.318	90.6301	91.8578
1261	284.977	261.316	137.559	163.474	90.6693	91.9847
1261.5	284.636	261.207	137.532	163.628	90.7074	92.1092
1261.9	284.296	261.097	137.505	163.78	90.7448	92.2314
1262.4	283.959	260.987	137.479	163.929	90.7813	92.3513
1262.8	283.629	260.88	137.451	164.077	90.8169	92.4688
1263.3	283.304	260.775	137.421	164.222	90.8515	92.5839
1263.7	282.986	260.674	137.389	164.365	90.8849	92.6964
1264.1	282.674	260.575	137.355	164.505	90.9172	92.8066
1264.6	282.366	260.472	137.323	164.642	90.9485	92.9148
1265	282.062	260.367	137.29	164.776	90.9786	93.021
1265.5	281.762	260.258	137.257	164.905	91.0076	93.1254
1265.9	281.466	260.145	137.225	165.031	91.0354	93.2277
1266.4	281.174	260.032	137.193	165.154	91.0619	93.3278
1266.8	280.885	259.917	137.162	165.274	91.0872	93.4256
1267.3	280.598	259.8	137.131	165.392	91.1115	93.5209
1267.7	280.313	259.681	137.1	165.506	91.1346	93.6137
1268.1	280.032	259.561	137.07	165.618	91.1565	93.7041
1268.5	279.753	259.442	137.039	165.728	91.1772	93.7918
1269	279.478	259.324	137.008	165.836	91.1965	93.8767
1269.4	279.205	259.204	136.978	165.941	91.2144	93.9589
1269.8	278.932	259.08	136.949	166.043	91.2311	94.0389
1270.2	278.658	258.949	136.923	166.141	91.2463	94.1166
1270.7	278.384	258.808	136.901	166.234	91.2602	94.1925
1271.1	278.107	258.658	136.882	166.324	91.2727	94.2663
1271.5	277.829	258.501	136.867	166.409	91.2838	94.3378
1271.9	277.549	258.335	136.855	166.491	91.2938	94.4072
1272.3	277.264	258.158	136.849	166.568	91.3031	94.4745
1272.8	276.977	257.971	136.846	166.642	91.3116	94.5396
1273.2	276.691	257.779	136.845	166.711	91.3196	94.6023
1273.6	276.407	257.584	136.845	166.777	91.3269	94.6625
1274.1	276.128	257.388	136.843	166.84	91.3333	94.7199
1274.5	275.854	257.193	136.841	166.9	91.3391	94.7745
1274.9	275.584	256.995	136.839	166.956	91.3446	94.8264
1275.4	275.321	256.797	136.835	167.009	91.3492	94.8756
1275.8	275.066	256.602	136.829	167.059	91.353	94.9219
1276.3	274.82	256.41	136.819	167.105	91.356	94.9652
1276.8	274.58	256.22	136.808	167.149	91.3579	95.0055
1277.2	274.348	256.032	136.793	167.19	91.3593	95.0427
1277.7	274.123	255.846	136.777	167.227	91.3603	95.0768
1278.2	273.905	255.664	136.758	167.262	91.3607	95.1076
1278.7	273.699	255.49	136.734	167.295	91.3606	95.1349
1279.2	273.506	255.325	136.703	167.326	91.3597	95.1587
1279.7	273.325	255.17	136.666	167.355	91.3577	95.1786
1280.2	273.157	255.024	136.624	167.381	91.3547	95.195
1280.7	272.997	254.881	136.578	167.405	91.3506	95.2081
1281.2	272.845	254.741	136.529	167.425	91.3454	95.2181
1281.7	272.702	254.601	136.478	167.441	91.3393	95.225
1282.2	272.564	254.46	136.426	167.453	91.332	95.229
1282.6	272.434	254.319	136.372	167.462	91.3234	95.2298
1283.1	272.309	254.175	136.317	167.466	91.314	95.2278
1283.6	272.186	254.025	136.263	167.465	91.3039	95.2231
1284	272.068	253.87	136.209	167.46	91.2932	95.2156
1284.5	271.959	253.716	136.152	167.45	91.2819	95.2049
1284.9	271.859	253.565	136.093	167.437	91.2698	95.1909
1285.4	271.771	253.418	136.028	167.42	91.2567	95.1735
1285.8	271.694	253.276	135.958	167.4	91.2428	95.1526
1286.2	271.624	253.131	135.887	167.375	91.2282	95.1287
1286.7	271.563	252.987	135.813	167.345	91.2131	95.1016
1287.1	271.513	252.844	135.736	167.311	91.1981	95.0713
1287.5	271.471	252.702	135.655	167.273	91.183	95.0379
1287.9	271.437	252.561	135.572	167.232	91.168	95.0015
1288.3	271.411	252.421	135.487	167.187	91.1531	94.9622
1288.7	271.389	252.279	135.401	167.138	91.1383	94.9204
1289.1	271.373	252.138	135.314	167.087	91.1239	94.8759
1289.6	271.363	251.999	135.224	167.033	91.1101	94.8287
1290	271.36	251.863	135.132	166.976	91.0965	94.7789
1290.4	271.363	251.731	135.038	166.918	91.0828	94.7265
1290.8	271.372	251.6	134.942	166.859	91.0691	94.6718
1291.3	271.383	251.47	134.846	166.796	91.0555	94.6148
1291.7	271.398	251.338	134.749	166.731	91.0422	94.5557
1292.2	271.416	251.205	134.653	166.664	91.0297	94.4944
1292.6	271.436	251.069	134.557	166.593	91.0176	94.4313
1293.1	271.456	250.933	134.462	166.522	91.0061	94.3664
1293.5	271.477	250.793	134.369	166.448	90.995	94.2999
1293.9	271.495	250.65	134.278	166.373	90.9841	94.232
1294.4	271.513	250.504	134.189	166.296	90.9736	94.1626
1294.8	271.533	250.358	134.1	166.218	90.9634	94.0915
1295.2	271.555	250.213	134.01	166.138	90.9536	94.0186
1295.7	271.581	250.07	133.92	166.057	90.9441	93.9437
1296.1	271.612	249.931	133.828	165.975	90.9351	93.867
1296.6	271.645	249.792	133.736	165.892	90.9262	93.7886
1297	271.682	249.656	133.642	165.807	90.9181	93.7083
1297.5	271.725	249.523	133.547	165.721	90.911	93.6261
1298	271.772	249.393	133.45	165.634	90.9049	93.5422
1298.5	271.822	249.266	133.352	165.547	90.8999	93.4568
1299	271.873	249.142	133.254	165.46	90.8958	93.3701
1299.5	271.923	249.019	133.157	165.372	90.8925	93.2824
1300.1	271.974	248.899	133.06	165.286	90.8903	93.1936
1300.6	272.028	248.783	132.963	165.199	90.8892	93.1036
1301.2	272.084	248.671	132.864	165.113	90.8887	93.0124
1301.7	272.141	248.565	132.765	165.028	90.8884	92.9202
1302.2	272.199	248.462	132.665	164.944	90.8883	92.8269
1302.6	272.258	248.361	132.566	164.86	90.8883	92.7327
1303.1	272.317	248.261	132.468	164.775	90.8885	92.6375
1303.5	272.378	248.161	132.37	164.69	90.8894	92.5412
1303.9	272.438	248.06	132.272	164.604	90.8903	92.444
1304.4	272.497	247.958	132.177	164.518	90.8914	92.346
1304.8	272.554	247.854	132.083	164.431	90.8928	92.2473
1305.2	272.608	247.746	131.992	164.343	90.8948	92.1479
1305.6	272.661	247.634	131.903	164.253	90.8973	92.0477
1306	272.713	247.52	131.816	164.163	90.9004	91.9469
1306.4	272.764	247.405	131.73	164.072	90.9039	91.8453
1306.8	272.815	247.289	131.645	163.98	90.9074	91.743
1307.1	272.865	247.17	131.562	163.888	90.9112	91.64
1307.5	272.913	247.048	131.481	163.793	90.9152	91.5363
1307.9	272.96	246.921	131.402	163.698	90.9199	91.432
1308.3	273.007	246.791	131.324	163.6	90.9258	91.3269
1308.7	273.051	246.655	131.249	163.501	90.9329	91.2213
1309.1	273.093	246.517	131.176	163.402	90.9412	91.1155
1309.5	273.131	246.375	131.107	163.302	90.9508	91.0096
1309.9	273.164	246.228	131.041	163.202	90.9615	90.9039
1310.4	273.192	246.078	130.978	163.102	90.9736	90.7984
1310.8	273.216	245.924	130.919	163.003	90.9874	90.6931
1311.2	273.234	245.767	130.863	162.904	91.0023	90.5883
1311.6	273.246	245.609	130.811	162.807	91.0179	90.4841
1312	273.252	245.447	130.763	162.711	91.0344	90.3806
1312.5	273.251	245.279	130.72	162.615	91.0515	90.2777
1312.9	273.243	245.106	130.681	162.519	91.0697	90.1754
1313.3	273.229	244.926	130.646	162.423	91.0895	90.0737
1313.7	273.208	244.739	130.617	162.327	91.1104	89.9728
1314.1	273.177	244.546	130.593	162.231	91.1326	89.873
1314.5	273.138	244.346	130.575	162.137	91.1556	89.7743
1314.9	273.089	244.138	130.563	162.043	91.1792	89.6768
1315.4	273.032	243.923	130.556	161.949	91.2036	89.5804
1315.8	272.969	243.704	130.554	161.856	91.2286	89.4847
1316.2	272.9	243.481	130.554	161.763	91.2542	89.3895
1316.7	272.827	243.256	130.557	161.672	91.2804	89.2949
1317.1	272.751	243.029	130.563	161.581	91.307	89.2005
1317.6	272.67	242.799	130.57	161.49	91.3339	89.1065
1318.1	272.588	242.568	130.579	161.399	91.3616	89.0125
1318.5	272.505	242.337	130.588	161.308	91.3902	88.9182
1319	272.422	242.105	130.598	161.218	91.4198	88.8239
1319.5	272.336	241.874	130.608	161.128	91.4504	88.7297
1320	272.249	241.643	130.62	161.04	91.4818	88.6357
1320.5	272.158	241.411	130.632	160.952	91.5136	88.542
1320.9	272.067	241.18	130.646	160.865	91.5461	88.4485
1321.4	271.976	240.952	130.657	160.78	91.5793	88.3546
1321.8	271.887	240.728	130.668	160.695	91.6133	88.2604
1322.2	271.799	240.509	130.676	160.611	91.6482	88.1659
1322.6	271.713	240.293	130.683	160.529	91.6839	88.0711
1323	271.627	240.079	130.689	160.447	91.7205	87.9763
1323.4	271.54	239.867	130.695	160.367	91.7579	87.8814
1323.8	271.454	239.655	130.7	160.286	91.7963	87.7865
1324.2	271.367	239.444	130.705	160.206	91.8357	87.6916
1324.6	271.28	239.234	130.71	160.127	91.8761	87.5968
1325	271.191	239.024	130.715	160.049	91.9173	87.5023
1325.3	271.1	238.812	130.721	159.971	91.9591	87.4082
1325.7	271.008	238.6	130.727	159.894	92.0015	87.3142
1326.1	270.917	238.391	130.731	159.817	92.0446	87.2201
1326.5	270.829	238.185	130.733	159.741	92.0883	87.1256
1326.8	270.745	237.985	130.731	159.666	92.1329	87.0305
1327.2	270.665	237.788	130.726	159.59	92.1781	86.9347
1327.6	270.587	237.595	130.718	159.516	92.224	86.8387
1328	270.513	237.405	130.708	159.441	92.271	86.7421
1328.5	270.444	237.22	130.693	159.367	92.3197	86.6448
1328.9	270.378	237.038	130.676	159.293	92.37	86.5472
1329.3	270.314	236.86	130.656	159.22	92.4222	86.4495
1329.8	270.251	236.685	130.635	159.149	92.4759	86.352
1330.2	270.185	236.511	130.614	159.079	92.5312	86.2553
1330.7	270.119	236.339	130.591	159.011	92.5883	86.1593
1331.1	270.052	236.17	130.568	158.944	92.6475	86.0638
1331.6	269.984	236.003	130.543	158.88	92.7083	85.9692
1332.1	269.913	235.839	130.519	158.818	92.7707	85.8757
1332.5	269.84	235.676	130.494	158.759	92.8348	85.7833
1333	269.763	235.515	130.469	158.702	92.9004	85.6922
1333.4	269.684	235.356	130.444	158.647	92.9679	85.6023
1333.9	269.602	235.197	130.419	158.594	93.0377	85.5136
1334.3	269.516	235.039	130.395	158.544	93.1096	85.4264
1334.7	269.423	234.88	130.372	158.497	93.1837	85.3411
1335.2	269.324	234.721	130.351	158.453	93.2594	85.258
1335.6	269.217	234.56	130.333	158.412	93.3365	85.1772
1336	269.104	234.399	130.317	158.375	93.4151	85.0986
1336.4	268.987	234.24	130.3	158.34	93.4951	85.0216
1336.9	268.867	234.083	130.284	158.309	93.5765	84.9462
1337.3	268.745	233.929	130.265	158.28	93.6596	84.872
1337.7	268.623	233.78	130.245	158.254	93.744	84.7991
1338.1	268.498	233.633	130.224	158.231	93.8296	84.7277
1338.6	268.373	233.492	130.2	158.211	93.9171	84.6573
1339	268.25	233.356	130.173	158.193	94.0066	84.5876
1339.4	268.127	233.226	130.143	158.178	94.0983	84.519
1339.8	268.002	233.099	130.111	158.167	94.1922	84.4521
1340.3	267.875	232.977	130.078	158.159	94.2881	84.3869
1340.7	267.742	232.856	130.045	158.155	94.3855	84.3241
1341.1	267.605	232.739	130.012	158.155	94.485	84.2633
1341.6	267.468	232.628	129.976	158.158	94.5864	84.2041
1342	267.328	232.521	129.938	158.166	94.6883	84.1467
1342.5	267.187	232.42	129.898	158.177	94.7895	84.0913
1342.9	267.043	232.323	129.856	158.192	94.89	84.0376
1343.4	266.897	232.229	129.814	158.211	94.989	83.9856
1343.8	266.749	232.139	129.77	158.232	95.087	83.935
1344.3	266.6	232.052	129.724	158.255	95.1846	83.8854
1344.8	266.45	231.968	129.678	158.281	95.2804	83.837
1345.2	266.297	231.885	129.632	158.309	95.3742	83.7899
1345.7	266.142	231.803	129.586	158.339	95.4668	83.7442
1346.2	265.984	231.722	129.541	158.371	95.5586	83.6995
1346.7	265.823	231.641	129.496	158.404	95.6493	83.656
1347.1	265.662	231.562	129.451	158.439	95.7393	83.6131
1347.6	265.5	231.485	129.405	158.475	95.8273	83.571
1348.1	265.339	231.411	129.358	158.512	95.9123	83.5295
1348.5	265.178	231.339	129.31	158.551	95.9948	83.4884
1349	265.017	231.268	129.262	158.59	96.0746	83.4475
1349.5	264.858	231.198	129.213	158.628	96.153	83.4066
1349.9	264.7	231.129	129.163	158.667	96.2312	83.3654
1350.4	264.544	231.061	129.113	158.705	96.3084	83.3242
1350.9	264.387	230.994	129.063	158.745	96.3853	83.2834
1351.4	264.23	230.927	129.014	158.784	96.4613	83.2431
1351.9	264.07	230.86	128.966	158.825	96.536	83.2036
1352.4	263.909	230.794	128.918	158.866	96.6103	83.1647
1352.9	263.747	230.727	128.871	158.908	96.6845	83.1264
1353.4	263.584	230.661	128.824	158.951	96.7568	83.0888
1353.8	263.418	230.596	128.779	158.996	96.8261	83.0523
1354.3	263.251	230.531	128.735	159.041	96.8926	83.0164
1354.8	263.082	230.464	128.692	159.086	96.9556	82.981
1355.3	262.912	230.396	128.651	159.131	97.0161	82.9457
1355.7	262.742	230.326	128.611	159.175	97.0751	82.9102
1356.2	262.571	230.255	128.574	159.218	97.1314	82.8747
1356.6	262.398	230.181	128.539	159.261	97.1848	82.8395
1357.1	262.224	230.104	128.506	159.303	97.2368	82.8045
1357.5	262.047	230.024	128.477	159.344	97.2879	82.7695
1357.9	261.869	229.942	128.45	159.385	97.3383	82.7347
1358.4	261.691	229.858	128.424	159.424	97.3887	82.6998
1358.8	261.513	229.774	128.4	159.464	97.4381	82.6649
1359.2	261.335	229.691	128.376	159.503	97.4859	82.6302
1359.7	261.158	229.608	128.352	159.542	97.5331	82.5956
1360.1	260.983	229.525	128.329	159.58	97.5798	82.5607
1360.5	260.809	229.443	128.305	159.618	97.6256	82.5256
1360.9	260.638	229.363	128.281	159.656	97.6702	82.4902
1361.3	260.47	229.285	128.256	159.693	97.7138	82.4546
1361.7	260.304	229.208	128.23	159.729	97.7559	82.4189
1362.2	260.139	229.132	128.205	159.766	97.7974	82.3831
1362.6	259.975	229.057	128.179	159.802	97.8389	82.3473
1363	259.813	228.984	128.154	159.838	97.88	82.3114
1363.4	259.654	228.913	128.127	159.874	97.9209	82.2755
1363.8	259.498	228.846	128.098	159.91	97.9601	82.2396
1364.2	259.345	228.782	128.068	159.947	97.9961	82.2038
1364.7	259.195	228.721	128.036	159.984	98.0294	82.1678
1365.1	259.048	228.662	128.004	160.019	98.0593	82.1314
1365.5	258.904	228.604	127.971	160.054	98.0863	82.0943
1365.9	258.764	228.547	127.939	160.087	98.1108	82.0564
1366.4	258.628	228.49	127.906	160.118	98.1317	82.0176
1366.8	258.496	228.434	127.873	160.147	98.1486	81.9779
1367.2	258.366	228.377	127.841	160.174	98.163	81.9371
1367.7	258.241	228.319	127.81	160.199	98.1756	81.895
1368.1	258.119	228.26	127.78	160.22	98.1863	81.8516
1368.5	258.002	228.202	127.75	160.239	98.1957	81.8071
1369	257.89	228.145	127.719	160.257	98.2024	81.7613
1369.4	257.784	228.091	127.687	160.272	98.2053	81.7144
1369.9	257.684	228.038	127.653	160.285	98.2055	81.6661
1370.3	257.59	227.985	127.62	160.295	98.203	81.6162
1370.7	257.501	227.934	127.586	160.302	98.1989	81.5646
1371.2	257.42	227.884	127.551	160.306	98.1949	81.5112
1371.6	257.344	227.834	127.515	160.308	98.1904	81.4563
1372.1	257.273	227.786	127.479	160.307	98.1861	81.4004
1372.5	257.207	227.739	127.443	160.304	98.1818	81.3437
1373	257.143	227.691	127.408	160.3	98.1774	81.2865
1373.4	257.082	227.644	127.373	160.295	98.1739	81.2289
1373.9	257.024	227.598	127.337	160.288	98.172	81.171
1374.4	256.969	227.554	127.302	160.281	98.1698	81.1133
1374.9	256.914	227.511	127.266	160.275	98.1665	81.0561
1375.3	256.862	227.469	127.23	160.268	98.1626	80.9992
1375.8	256.81	227.427	127.195	160.26	98.1574	80.9426
1376.3	256.761	227.385	127.161	160.251	98.1525	80.886
1376.8	256.713	227.344	127.128	160.242	98.1491	80.8294
1377.3	256.667	227.302	127.095	160.231	98.1461	80.7732
1377.7	256.62	227.26	127.063	160.221	98.1436	80.7179
1378.2	256.573	227.218	127.033	160.211	98.1412	80.6636
1378.7	256.524	227.175	127.005	160.202	98.1381	80.6103
1379.1	256.474	227.131	126.978	160.192	98.1346	80.5582
1379.6	256.425	227.088	126.951	160.183	98.1309	80.5068
1380	256.377	227.045	126.926	160.173	98.1266	80.4562
1380.5	256.329	227.004	126.9	160.164	98.122	80.4065
1380.9	256.283	226.964	126.874	160.155	98.1166	80.3576
1381.3	256.238	226.925	126.849	160.147	98.1102	80.3094
1381.8	256.194	226.887	126.824	160.138	98.1043	80.2619
1382.2	256.153	226.851	126.798	160.128	98.0995	80.2147
1382.6	256.113	226.816	126.773	160.119	98.0959	80.1684
1383.1	256.074	226.783	126.747	160.111	98.0938	80.1234
1383.5	256.033	226.751	126.722	160.104	98.0926	80.0801
1383.9	255.991	226.72	126.698	160.099	98.0916	80.0389
1384.3	255.947	226.69	126.674	160.096	98.0917	79.9996
1384.7	255.903	226.662	126.651	160.094	98.0931	79.9621
1385.1	255.858	226.635	126.627	160.094	98.0937	79.9267
1385.6	255.81	226.611	126.604	160.096	98.0923	79.8936
1386	255.762	226.589	126.581	160.1	98.089	79.8625
1386.4	255.714	226.567	126.558	160.105	98.0826	79.8329
1386.8	255.665	226.547	126.536	160.11	98.0742	79.8047
1387.2	255.618	226.527	126.514	160.115	98.0647	79.7772
1387.6	255.573	226.507	126.494	160.12	98.0524	79.7506
1388	255.528	226.488	126.474	160.125	98.0371	79.7251
1388.4	255.483	226.468	126.455	160.129	98.0197	79.7003
1388.8	255.44	226.448	126.438	160.132	98.0007	79.6761
1389.2	255.399	226.427	126.422	160.135	97.9799	79.6524
1389.6	255.36	226.407	126.407	160.136	97.9578	79.6292
1390	255.323	226.387	126.393	160.136	97.933	79.6065
1390.4	255.288	226.367	126.379	160.136	97.9043	79.5845
1390.9	255.255	226.347	126.366	160.134	97.8726	79.5627
1391.3	255.226	226.327	126.354	160.13	97.8376	79.5407
1391.7	255.202	226.306	126.344	160.124	97.8009	79.5184
1392.1	255.182	226.285	126.334	160.115	97.7641	79.4954
1392.5	255.165	226.263	126.325	160.103	97.7267	79.4722
1392.9	255.151	226.241	126.317	160.091	97.6893	79.4495
1393.4	255.139	226.219	126.311	160.077	97.6514	79.4274
1393.8	255.128	226.196	126.306	160.062	97.6126	79.4062
1394.2	255.118	226.172	126.302	160.048	97.574	79.3863
1394.6	255.108	226.149	126.3	160.032	97.5361	79.3673
1395	255.099	226.125	126.299	160.017	97.4968	79.3498
1395.5	255.089	226.102	126.3	160.003	97.4551	79.3343
1395.9	255.078	226.078	126.301	159.988	97.4111	79.3205
1396.4	255.069	226.054	126.305	159.973	97.364	79.3076
1396.8	255.061	226.029	126.31	159.957	97.3154	79.2956
1397.3	255.056	226.002	126.317	159.939	97.2666	79.2839
1397.7	255.052	225.975	126.326	159.919	97.2161	79.2728
1398.2	255.049	225.947	126.337	159.899	97.164	79.263
1398.7	255.046	225.917	126.35	159.878	97.1113	79.2544
1399.1	255.044	225.886	126.365	159.856	97.0584	79.2468
1399.6	255.044	225.854	126.381	159.833	97.0056	79.2402
1400	255.044	225.821	126.4	159.809	96.9537	79.2344
1400.5	255.045	225.788	126.419	159.785	96.9017	79.2294
1401	255.047	225.754	126.44	159.76	96.8491	79.2255
1401.4	255.05	225.721	126.461	159.734	96.7968	79.2223
1401.9	255.054	225.687	126.483	159.708	96.7448	79.2196
1402.3	255.06	225.654	126.506	159.68	96.6932	79.2171
1402.8	255.069	225.62	126.529	159.652	96.6421	79.2147
1403.2	255.079	225.587	126.553	159.623	96.5916	79.2125
1403.7	255.089	225.554	126.576	159.593	96.5415	79.2111
1404.1	255.1	225.522	126.601	159.563	96.4924	79.2103
1404.6	255.111	225.489	126.625	159.534	96.4447	79.2105
1405	255.123	225.457	126.651	159.504	96.3983	79.2114
1405.4	255.135	225.426	126.675	159.475	96.3536	79.2129
1405.8	255.147	225.396	126.7	159.446	96.3092	79.215
1406.3	255.158	225.368	126.724	159.418	96.264	79.218
1406.7	255.17	225.34	126.748	159.39	96.2185	79.2216
1407.1	255.182	225.313	126.771	159.362	96.172	79.2256
1407.5	255.195	225.286	126.795	159.334	96.1253	79.2299
1407.9	255.21	225.26	126.819	159.305	96.0787	79.234
1408.3	255.226	225.234	126.842	159.275	96.0314	79.2381
1408.7	255.242	225.208	126.866	159.244	95.9832	79.2423
1409.1	255.26	225.182	126.889	159.213	95.9353	79.2466
1409.5	255.28	225.156	126.913	159.181	95.8884	79.2507
1409.9	255.301	225.13	126.938	159.147	95.8425	79.2546
1410.3	255.323	225.104	126.961	159.113	95.7981	79.2582
1410.7	255.346	225.079	126.984	159.079	95.7542	79.2614
1411.1	255.371	225.056	127.006	159.044	95.7101	79.2644
1411.5	255.396	225.033	127.027	159.009	95.6666	79.2669
1411.9	255.423	225.01	127.047	158.972	95.6237	79.2686
1412.3	255.452	224.989	127.067	158.935	95.5812	79.2696
1412.7	255.483	224.968	127.085	158.897	95.5393	79.2696
1413.1	255.516	224.948	127.102	158.857	95.4976	79.2689
1413.5	255.549	224.928	127.119	158.818	95.456	79.2679
1413.9	255.583	224.909	127.135	158.778	95.415	79.2667
1414.3	255.617	224.891	127.15	158.738	95.3748	79.2655
1414.7	255.651	224.873	127.166	158.698	95.3351	79.2644
1415.1	255.685	224.855	127.18	158.658	95.2962	79.2634
1415.5	255.718	224.838	127.194	158.618	95.2577	79.2628
1415.9	255.75	224.822	127.208	158.579	95.2195	79.2627
1416.3	255.781	224.806	127.221	158.541	95.1816	79.2632
1416.7	255.811	224.791	127.234	158.503	95.144	79.2639
1417.1	255.841	224.776	127.247	158.465	95.1067	79.2649
1417.6	255.87	224.761	127.259	158.427	95.0699	79.2658
1418	255.899	224.746	127.271	158.389	95.0333	79.267
1418.4	255.926	224.732	127.283	158.351	94.9969	79.2689
1418.8	255.952	224.717	127.295	158.315	94.9614	79.2715
1419.2	255.976	224.702	127.307	158.278	94.9272	79.2749
1419.7	255.999	224.687	127.319	158.243	94.8944	79.2788
1420.1	256.02	224.673	127.331	158.207	94.8631	79.2831
1420.5	256.04	224.659	127.342	158.173	94.8332	79.2876
1420.9	256.058	224.645	127.352	158.139	94.8044	79.2924
1421.4	256.074	224.633	127.361	158.106	94.7772	79.2972
1421.8	256.09	224.621	127.369	158.074	94.7516	79.3021
1422.3	256.104	224.611	127.376	158.042	94.7274	79.3067
1422.7	256.116	224.601	127.381	158.011	94.7044	79.311
1423.1	256.128	224.592	127.384	157.981	94.6825	79.315
1423.6	256.137	224.585	127.386	157.952	94.6616	79.3193
1424	256.144	224.578	127.387	157.925	94.6422	79.3238
1424.5	256.148	224.571	127.388	157.898	94.6246	79.3288
1424.9	256.149	224.566	127.387	157.873	94.6087	79.3343
1425.3	256.148	224.561	127.384	157.849	94.5943	79.3399
1425.8	256.143	224.558	127.38	157.827	94.5804	79.3457
1426.2	256.136	224.556	127.375	157.807	94.5656	79.3519
1426.7	256.126	224.554	127.368	157.788	94.5503	79.3582
1427.1	256.114	224.553	127.361	157.77	94.5339	79.3647
1427.5	256.1	224.553	127.352	157.753	94.5166	79.371
1428	256.085	224.553	127.342	157.736	94.4988	79.3771
1428.4	256.069	224.554	127.331	157.719	94.4794	79.3829
1428.8	256.051	224.554	127.319	157.702	94.4581	79.3886
[truncated: 1,000 more rows]

## Sheet: Sheet3
0.036389	0.000635505	3.19453e-05	-0.000654344	1.8965e-08	1.15456e-07	-1.24097e-12
0.11549	0.000652377	3.25803e-05	-0.000669468	1.9395e-08	1.18083e-07	-1.26909e-12
0.24433	0.000669511	3.32241e-05	-0.000684816	1.98313e-08	1.20748e-07	-1.29762e-12
0.4542	0.000686926	3.3877e-05	-0.0007004	2.02743e-08	1.23454e-07	-1.32659e-12
0.79606	0.000704629	3.45393e-05	-0.000716226	2.07241e-08	1.26202e-07	-1.35601e-12
1.3529	0.000722635	3.52114e-05	-0.000732308	2.11811e-08	1.28994e-07	-1.38589e-12
2.26	0.000740941	3.58932e-05	-0.000748641	2.16452e-08	1.31829e-07	-1.41624e-12
3.7374	0.000759532	3.65844e-05	-0.000765215	2.2116e-08	1.34705e-07	-1.44703e-12
6.1441	0.000778418	3.72853e-05	-0.000782038	2.25939e-08	1.37625e-07	-1.47828e-12
9.154	0.000797605	3.79959e-05	-0.000799114	2.30789e-08	1.40588e-07	-1.51e-12
12.164	0.000817092	3.87155e-05	-0.000816453	2.35759e-08	1.43576e-07	-1.63915e-12
15.174	0.000836888	3.94431e-05	-0.000834073	2.40918e-08	1.46564e-07	-2.00482e-12
18.184	0.000856989	4.0178e-05	-0.00085198	2.46308e-08	1.49535e-07	-2.69092e-12
21.194	0.000877393	4.09189e-05	-0.000870184	2.5199e-08	1.52465e-07	-3.82235e-12
24.203	0.000898108	4.16656e-05	-0.000888697	2.57994e-08	1.55343e-07	-5.45745e-12
27.213	0.000919144	4.24183e-05	-0.000907528	2.64333e-08	1.58169e-07	-7.61495e-12
30.223	0.000940505	4.31758e-05	-0.000926694	2.71074e-08	1.60915e-07	-1.04313e-11
33.233	0.000962198	4.39373e-05	-0.000946212	2.78284e-08	1.63558e-07	-1.40359e-11
36.243	0.000984221	4.47027e-05	-0.000966081	2.85964e-08	1.66097e-07	-1.84361e-11
39.253	0.00100657	4.54717e-05	-0.000986296	2.94116e-08	1.68529e-07	-2.36341e-11
42.263	0.00102924	4.62442e-05	-0.00100686	3.02758e-08	1.7085e-07	-2.96678e-11
45.273	0.00105224	4.70202e-05	-0.00102778	3.11888e-08	1.73058e-07	-3.65324e-11
48.283	0.00107556	4.77985e-05	-0.00104907	3.21573e-08	1.7513e-07	-4.43623e-11
51.293	0.00109922	4.85778e-05	-0.00107074	3.31911e-08	1.77028e-07	-5.3351e-11
54.302	0.00112321	4.93576e-05	-0.00109281	3.42925e-08	1.78742e-07	-6.35488e-11
57.312	0.00114753	5.01371e-05	-0.00111528	3.54657e-08	1.80257e-07	-7.50415e-11
60.322	0.00117219	5.09164e-05	-0.00113815	3.67113e-08	1.81573e-07	-8.78343e-11
63.332	0.0011972	5.16967e-05	-0.00116143	3.80255e-08	1.82705e-07	-1.01847e-10
66.342	0.00122256	5.24776e-05	-0.00118513	3.94107e-08	1.83647e-07	-1.17125e-10
69.352	0.0012483	5.32594e-05	-0.00120926	4.08678e-08	1.84398e-07	-1.33682e-10
72.362	0.0012744	5.4042e-05	-0.00123382	4.23977e-08	1.84954e-07	-1.51534e-10
75.372	0.00130088	5.48248e-05	-0.00125881	4.40034e-08	1.85303e-07	-1.70744e-10
78.382	0.00132773	5.56084e-05	-0.00128424	4.56838e-08	1.85452e-07	-1.91284e-10
81.391	0.00135496	5.63932e-05	-0.00131012	4.74372e-08	1.85408e-07	-2.13117e-10
84.401	0.00138258	5.71779e-05	-0.00133645	4.92714e-08	1.85143e-07	-2.36402e-10
87.411	0.00141059	5.79609e-05	-0.00136327	5.11964e-08	1.84617e-07	-2.61339e-10
90.421	0.00143899	5.87414e-05	-0.00139057	5.32176e-08	1.83812e-07	-2.88033e-10
93.431	0.00146778	5.95178e-05	-0.00141838	5.53437e-08	1.82692e-07	-3.16663e-10
96.441	0.00149696	6.02902e-05	-0.00144671	5.75755e-08	1.81256e-07	-3.47242e-10
99.451	0.00152656	6.10595e-05	-0.00147555	5.99099e-08	1.79518e-07	-3.79701e-10
102.46	0.00155656	6.18246e-05	-0.00150492	6.23538e-08	1.77454e-07	-4.14181e-10
105.47	0.00158699	6.25848e-05	-0.00153484	6.49126e-08	1.75042e-07	-4.50785e-10
108.44	0.00161783	6.33406e-05	-0.0015653	6.75837e-08	1.72294e-07	-4.89461e-10
111.32	0.00164908	6.40921e-05	-0.0015963	7.03648e-08	1.69216e-07	-5.30168e-10
114.12	0.00168074	6.48398e-05	-0.00162782	7.32538e-08	1.65818e-07	-5.7286e-10
116.86	0.00171282	6.55848e-05	-0.00165987	7.62453e-08	1.62121e-07	-6.17425e-10
119.53	0.00174531	6.63263e-05	-0.00169244	7.93429e-08	1.5811e-07	-6.63941e-10
121.92	0.00177822	6.70633e-05	-0.00172556	8.25534e-08	1.53761e-07	-7.12539e-10
124.27	0.00181154	6.77964e-05	-0.00175922	8.58738e-08	1.49084e-07	-7.63163e-10
126.63	0.00184527	6.85255e-05	-0.00179341	8.93032e-08	1.44082e-07	-8.15795e-10
128.74	0.00187943	6.92505e-05	-0.00182814	9.28442e-08	1.38747e-07	-8.70483e-10
131.2	0.00191401	6.99716e-05	-0.00186342	9.64973e-08	1.33079e-07	-9.27233e-10
133.6	0.00194903	7.06884e-05	-0.00189927	1.00265e-07	1.27068e-07	-9.86102e-10
135.8	0.00198448	7.14005e-05	-0.00193568	1.04152e-07	1.20699e-07	-1.04717e-09
138.02	0.00202037	7.21082e-05	-0.00197267	1.08156e-07	1.13984e-07	-1.11038e-09
140.25	0.0020567	7.28124e-05	-0.00201021	1.12271e-07	1.06938e-07	-1.17564e-09
142.38	0.00209347	7.35129e-05	-0.00204831	1.16499e-07	9.95604e-08	-1.24297e-09
144.44	0.00213068	7.42102e-05	-0.00208697	1.20838e-07	9.18555e-08	-1.31234e-09
146.44	0.00216834	7.4903e-05	-0.00212621	1.25296e-07	8.37953e-08	-1.38391e-09
148.4	0.00220644	7.55893e-05	-0.00216606	1.29886e-07	7.53315e-08	-1.45792e-09
150.33	0.00224501	7.62685e-05	-0.00220652	1.34612e-07	6.64464e-08	-1.53448e-09
152.23	0.00228403	7.69392e-05	-0.00224763	1.39483e-07	5.71099e-08	-1.61374e-09
154.12	0.00232352	7.76008e-05	-0.00228938	1.44503e-07	4.73057e-08	-1.69579e-09
156.02	0.00236348	7.82535e-05	-0.00233178	1.49673e-07	3.70335e-08	-1.78064e-09
157.88	0.00240391	7.88956e-05	-0.00237486	1.55001e-07	2.62561e-08	-1.86849e-09
159.69	0.00244482	7.95259e-05	-0.00241865	1.60499e-07	1.49375e-08	-1.95953e-09
161.5	0.00248622	8.01447e-05	-0.00246312	1.66163e-07	3.09004e-09	-2.05369e-09
163.3	0.00252809	8.07529e-05	-0.00250829	1.71988e-07	-9.26874e-09	-2.15088e-09
165.1	0.00257044	8.13505e-05	-0.00255413	1.77974e-07	-2.21381e-08	-2.2511e-09
166.89	0.00261328	8.19384e-05	-0.00260065	1.84116e-07	-3.54999e-08	-2.35426e-09
168.69	0.0026566	8.25154e-05	-0.00264787	1.90423e-07	-4.93833e-08	-2.46051e-09
170.47	0.00270041	8.30794e-05	-0.00269581	1.96907e-07	-6.38384e-08	-2.57011e-09
172.23	0.00274472	8.36305e-05	-0.00274448	2.03568e-07	-7.88618e-08	-2.68305e-09
173.98	0.00278952	8.41685e-05	-0.00279387	2.10408e-07	-9.44609e-08	-2.79938e-09
175.71	0.00283482	8.46939e-05	-0.002844	2.17426e-07	-1.1063e-07	-2.91906e-09
177.42	0.00288063	8.52081e-05	-0.00289486	2.24614e-07	-1.2734e-07	-3.04194e-09
179.11	0.00292696	8.57112e-05	-0.00294645	2.31974e-07	-1.44592e-07	-3.16806e-09
180.8	0.00297383	8.62035e-05	-0.00299878	2.39506e-07	-1.62385e-07	-3.29739e-09
182.47	0.00302122	8.66857e-05	-0.00305185	2.47206e-07	-1.80705e-07	-3.42987e-09
184.12	0.00306915	8.71581e-05	-0.00310566	2.55073e-07	-1.99545e-07	-3.56548e-09
185.76	0.00311762	8.76219e-05	-0.0031602	2.63102e-07	-2.18886e-07	-3.7041e-09
187.39	0.00316664	8.80783e-05	-0.00321547	2.71287e-07	-2.38702e-07	-3.84562e-09
189.01	0.00321621	8.85263e-05	-0.00327148	2.79634e-07	-2.59016e-07	-3.99015e-09
190.62	0.00326635	8.89646e-05	-0.00332826	2.88152e-07	-2.79863e-07	-4.13789e-09
192.22	0.00331704	8.9393e-05	-0.0033858	2.96844e-07	-3.0125e-07	-4.28887e-09
193.8	0.00336831	8.98105e-05	-0.00344414	3.05716e-07	-3.23199e-07	-4.44321e-09
195.38	0.00342015	9.02179e-05	-0.00350326	3.14764e-07	-3.45696e-07	-4.60084e-09
196.95	0.00347257	9.06171e-05	-0.00356315	3.23979e-07	-3.68704e-07	-4.76158e-09
198.51	0.00352559	9.10077e-05	-0.00362383	3.33365e-07	-3.92236e-07	-4.9255e-09
200.06	0.0035792	9.13897e-05	-0.00368531	3.42924e-07	-4.16297e-07	-5.09263e-09
201.61	0.00363342	9.17629e-05	-0.00374759	3.52656e-07	-4.40887e-07	-5.26297e-09
203.15	0.00368823	9.21268e-05	-0.00381068	3.62565e-07	-4.66024e-07	-5.43662e-09
204.69	0.00374365	9.24814e-05	-0.00387457	3.7265e-07	-4.91702e-07	-5.61354e-09
206.34	0.00379967	9.28273e-05	-0.00393926	3.8291e-07	-5.17917e-07	-5.79372e-09
207.9	0.00385629	9.31637e-05	-0.00400477	3.93349e-07	-5.44683e-07	-5.97722e-09
209.43	0.00391353	9.34903e-05	-0.00407111	4.03971e-07	-5.72012e-07	-6.16413e-09
210.94	0.00397138	9.38066e-05	-0.00413828	4.14778e-07	-5.99914e-07	-6.35449e-09
212.43	0.00402985	9.41121e-05	-0.00420629	4.25774e-07	-6.28404e-07	-6.54838e-09
213.91	0.00408894	9.44077e-05	-0.00427514	4.36955e-07	-6.57466e-07	-6.74573e-09
215.38	0.00414867	9.46948e-05	-0.00434483	4.48314e-07	-6.87071e-07	-6.94638e-09
216.85	0.00420904	9.49738e-05	-0.00441536	4.59852e-07	-7.17214e-07	-7.15033e-09
218.32	0.00427006	9.52457e-05	-0.00448672	4.71563e-07	-7.47882e-07	-7.35749e-09
219.79	0.00433173	9.55104e-05	-0.00455894	4.83451e-07	-7.79075e-07	-7.5679e-09
221.27	0.00439406	9.57671e-05	-0.004632	4.95517e-07	-8.1081e-07	-7.78162e-09
222.76	0.00445705	9.60166e-05	-0.00470592	5.0776e-07	-8.43074e-07	-7.9986e-09
224.26	0.0045207	9.62597e-05	-0.00478068	5.20176e-07	-8.75855e-07	-8.21877e-09
225.77	0.00458503	9.64947e-05	-0.00485632	5.32776e-07	-9.09188e-07	-8.44233e-09
227.28	0.00465003	9.672e-05	-0.00493286	5.45569e-07	-9.43116e-07	-8.6695e-09
228.79	0.00471571	9.69341e-05	-0.00501031	5.58566e-07	-9.77671e-07	-8.90045e-09
230.29	0.00478206	9.7135e-05	-0.0050887	5.71777e-07	-1.0129e-06	-9.13542e-09
231.76	0.00484911	9.73225e-05	-0.00516803	5.85205e-07	-1.04881e-06	-9.37445e-09
233.21	0.00491684	9.74975e-05	-0.00524832	5.98847e-07	-1.08538e-06	-9.61748e-09
234.64	0.00498527	9.76581e-05	-0.00532957	6.12714e-07	-1.12267e-06	-9.86474e-09
236.06	0.00505441	9.78029e-05	-0.00541182	6.26815e-07	-1.16069e-06	-1.01164e-08
237.47	0.00512425	9.79321e-05	-0.00549506	6.41151e-07	-1.19946e-06	-1.03725e-08
238.87	0.00519479	9.80453e-05	-0.00557931	6.55723e-07	-1.23898e-06	-1.0633e-08
240.26	0.00526605	9.81427e-05	-0.00566456	6.70532e-07	-1.27926e-06	-1.0898e-08
241.65	0.00533803	9.82246e-05	-0.00575082	6.85576e-07	-1.32027e-06	-1.11673e-08
243.05	0.00541073	9.82894e-05	-0.00583811	7.00866e-07	-1.36207e-06	-1.14414e-08
244.47	0.00548415	9.83347e-05	-0.00592646	7.16416e-07	-1.40471e-06	-1.17203e-08
245.91	0.00555829	9.836e-05	-0.00601587	7.3223e-07	-1.4482e-06	-1.20042e-08
247.34	0.00563317	9.83642e-05	-0.00610637	7.48314e-07	-1.49256e-06	-1.22933e-08
248.76	0.00570878	9.83482e-05	-0.00619796	7.64666e-07	-1.53779e-06	-1.25874e-08
250.18	0.00578515	9.83143e-05	-0.00629061	7.81274e-07	-1.58384e-06	-1.28863e-08
251.59	0.00586226	9.82624e-05	-0.00638434	7.98139e-07	-1.63071e-06	-1.31901e-08
253	0.00594015	9.81934e-05	-0.00647915	8.15258e-07	-1.67838e-06	-1.34987e-08
254.41	0.0060188	9.81077e-05	-0.00657504	8.3263e-07	-1.72685e-06	-1.3812e-08
255.81	0.00609823	9.80045e-05	-0.00667203	8.5026e-07	-1.77614e-06	-1.41302e-08
257.2	0.00617843	9.78855e-05	-0.0067701	8.6814e-07	-1.82622e-06	-1.4453e-08
258.59	0.00625943	9.7752e-05	-0.00686925	8.86265e-07	-1.87706e-06	-1.47805e-08
259.97	0.00634123	9.76021e-05	-0.0069695	9.04644e-07	-1.92871e-06	-1.51127e-08
261.35	0.00642382	9.74336e-05	-0.00707088	9.23293e-07	-1.98121e-06	-1.54499e-08
262.72	0.00650721	9.72455e-05	-0.00717342	9.42218e-07	-2.03459e-06	-1.57924e-08
264.09	0.0065914	9.70355e-05	-0.00727712	9.61431e-07	-2.08891e-06	-1.61404e-08
265.46	0.00667641	9.68046e-05	-0.007382	9.8093e-07	-2.14414e-06	-1.64937e-08
266.82	0.00676223	9.65549e-05	-0.00748804	1.0007e-06	-2.20024e-06	-1.68522e-08
268.17	0.00684888	9.62852e-05	-0.00759527	1.02076e-06	-2.25725e-06	-1.72161e-08
269.52	0.00693637	9.59948e-05	-0.00770368	1.0411e-06	-2.31518e-06	-1.75853e-08
270.86	0.00702454	9.56828e-05	-0.00781284	1.06227e-06	-2.37388e-06	-1.79446e-08
272.2	0.00711319	9.5347e-05	-0.00792209	1.08502e-06	-2.43315e-06	-1.82719e-08
273.54	0.00720219	9.49868e-05	-0.00803104	1.10982e-06	-2.49286e-06	-1.85537e-08
274.87	0.00729136	9.46017e-05	-0.00813911	1.13735e-06	-2.55279e-06	-1.87702e-08
276.2	0.00738062	9.41899e-05	-0.00824602	1.16794e-06	-2.61289e-06	-1.89123e-08
277.52	0.00746994	9.37499e-05	-0.00835172	1.20169e-06	-2.67315e-06	-1.8977e-08
278.84	0.00755911	9.328e-05	-0.00845557	1.23937e-06	-2.73338e-06	-1.89428e-08
280.15	0.00764795	9.27779e-05	-0.00855697	1.28168e-06	-2.79339e-06	-1.87892e-08
281.46	0.00773644	9.22441e-05	-0.00865588	1.32866e-06	-2.85316e-06	-1.8515e-08
282.77	0.0078246	9.16796e-05	-0.0087523	1.38032e-06	-2.91267e-06	-1.81196e-08
284.07	0.00791236	9.10839e-05	-0.00884606	1.43688e-06	-2.97187e-06	-1.75973e-08
285.37	0.00799975	9.04571e-05	-0.00893718	1.4983e-06	-3.03076e-06	-1.69486e-08
286.66	0.00808657	8.97978e-05	-0.00902503	1.56532e-06	-3.08915e-06	-1.61523e-08
287.95	0.00817252	8.91033e-05	-0.00910872	1.63901e-06	-3.14673e-06	-1.51776e-08
289.23	0.00825753	8.83735e-05	-0.00918801	1.71965e-06	-3.20344e-06	-1.40166e-08
290.5	0.00834148	8.76078e-05	-0.0092625	1.8077e-06	-3.25913e-06	-1.26555e-08
291.75	0.00842437	8.68051e-05	-0.00933218	1.90321e-06	-3.31382e-06	-1.10937e-08
293	0.00850631	8.59648e-05	-0.00939745	2.00573e-06	-3.36767e-06	-9.344e-09
294.25	0.00858726	8.50856e-05	-0.00945811	2.11553e-06	-3.42063e-06	-7.39955e-09
295.49	0.00866719	8.4166e-05	-0.00951412	2.23269e-06	-3.47271e-06	-5.25818e-09
296.74	0.00874608	8.32056e-05	-0.00956541	2.35729e-06	-3.5239e-06	-2.91737e-09
297.98	0.00882384	8.22043e-05	-0.00961169	2.48969e-06	-3.57409e-06	-3.67147e-10
299.23	0.00890053	8.11612e-05	-0.00965311	2.62973e-06	-3.62335e-06	2.38787e-09
300.48	0.00897621	8.00759e-05	-0.00968985	2.77723e-06	-3.67176e-06	5.34185e-09
301.73	0.00905063	7.89466e-05	-0.00972118	2.93305e-06	-3.71908e-06	8.51991e-09
302.97	0.0091235	7.77711e-05	-0.00974617	3.09828e-06	-3.765e-06	1.19537e-08
304.21	0.00919466	7.65481e-05	-0.0097643	3.27353e-06	-3.80936e-06	1.56603e-08
305.45	0.00926385	7.52763e-05	-0.00977476	3.45974e-06	-3.85188e-06	1.96678e-08
306.7	0.00933105	7.39543e-05	-0.00977749	3.65703e-06	-3.89256e-06	2.39784e-08
307.9	0.00939636	7.25816e-05	-0.00977284	3.865e-06	-3.93154e-06	2.85809e-08
309.08	0.00945959	7.11565e-05	-0.00976015	4.08443e-06	-3.96863e-06	3.34974e-08
310.25	0.00952058	6.96772e-05	-0.00973896	4.3159e-06	-4.00365e-06	3.87445e-08
311.41	0.00957941	6.81445e-05	-0.0097095	4.55912e-06	-4.03671e-06	4.4314e-08
312.56	0.00963616	6.65598e-05	-0.00967198	4.81386e-06	-4.06784e-06	5.01993e-08
313.7	0.0096909	6.49235e-05	-0.00962663	5.07987e-06	-4.09713e-06	5.63929e-08
314.84	0.00974382	6.32368e-05	-0.00957397	5.35655e-06	-4.12475e-06	6.28772e-08
315.97	0.00979481	6.1499e-05	-0.00951365	5.6443e-06	-4.15058e-06	6.96645e-08
317.11	0.00984366	5.97086e-05	-0.00944506	5.94387e-06	-4.17443e-06	7.67757e-08
318.24	0.00989047	5.78666e-05	-0.00936846	6.25494e-06	-4.19637e-06	8.42018e-08
319.37	0.00993528	5.59737e-05	-0.00928395	6.5774e-06	-4.21642e-06	9.194e-08
320.51	0.00997802	5.40287e-05	-0.00919132	6.91153e-06	-4.23454e-06	9.99977e-08
321.65	0.0100187	5.20304e-05	-0.00909055	7.25737e-06	-4.25073e-06	1.08376e-07
322.79	0.0100572	4.99777e-05	-0.00898138	7.61523e-06	-4.26493e-06	1.17084e-07
323.95	0.0100935	4.7869e-05	-0.00886347	7.98556e-06	-4.27703e-06	1.26133e-07
325.11	0.0101275	4.5705e-05	-0.00873708	8.36805e-06	-4.28712e-06	1.35516e-07
326.28	0.0101596	4.34876e-05	-0.00860262	8.7622e-06	-4.29532e-06	1.45217e-07
327.43	0.0101896	4.12163e-05	-0.00846005	9.16811e-06	-4.30163e-06	1.5524e-07
328.57	0.0102176	3.88908e-05	-0.00830951	9.58562e-06	-4.30609e-06	1.65579e-07
329.69	0.0102434	3.65094e-05	-0.00815029	1.00156e-05	-4.30848e-06	1.7626e-07
330.8	0.0102665	3.40686e-05	-0.00798118	1.04594e-05	-4.30842e-06	1.87322e-07
331.91	0.0102869	3.15671e-05	-0.00780176	1.09176e-05	-4.30578e-06	1.9878e-07
333	0.0103044	2.90033e-05	-0.00761127	1.1391e-05	-4.30029e-06	2.10661e-07
334.09	0.0103187	2.63754e-05	-0.00740932	1.18802e-05	-4.29185e-06	2.22977e-07
335.18	0.0103299	2.3683e-05	-0.00719588	1.23851e-05	-4.28046e-06	2.35731e-07
336.26	0.0103377	2.09232e-05	-0.00697005	1.2907e-05	-4.26584e-06	2.48953e-07
337.34	0.0103418	1.80934e-05	-0.00673091	1.34468e-05	-4.24769e-06	2.62673e-07
338.43	0.0103422	1.51944e-05	-0.00647878	1.40041e-05	-4.22611e-06	2.76883e-07
339.51	0.0103393	1.22279e-05	-0.00621411	1.45786e-05	-4.20125e-06	2.91566e-07
340.6	0.0103329	9.19367e-06	-0.00593692	1.517e-05	-4.17312e-06	3.06722e-07
341.7	0.0103232	6.09301e-06	-0.00564766	1.57781e-05	-4.14185e-06	3.22337e-07
342.8	0.01031	2.92387e-06	-0.0053456	1.64035e-05	-4.10723e-06	3.38435e-07
343.9	0.0102929	-3.17441e-07	-0.00502951	1.70478e-05	-4.06886e-06	3.55059e-07
345.03	0.0102719	-3.63058e-06	-0.00469948	1.77109e-05	-4.02676e-06	3.72205e-07
346.16	0.010247	-7.01596e-06	-0.00435531	1.8393e-05	-3.98087e-06	3.8988e-07
347.3	0.0102182	-1.04744e-05	-0.00399714	1.90939e-05	-3.93126e-06	4.0808e-07
348.44	0.0101857	-1.40053e-05	-0.00362571	1.98129e-05	-3.8782e-06	4.26781e-07
349.56	0.0101496	-1.76099e-05	-0.00324093	2.05501e-05	-3.82167e-06	4.45986e-07
350.67	0.0101097	-2.12894e-05	-0.00284284	2.13054e-05	-3.76171e-06	4.65694e-07
351.78	0.0100664	-2.50434e-05	-0.0024318	2.20785e-05	-3.69845e-06	4.85895e-07
352.88	0.0100195	-2.88714e-05	-0.00200795	2.28692e-05	-3.63193e-06	5.06582e-07
353.98	0.00996928	-3.27737e-05	-0.00157177	2.3677e-05	-3.56234e-06	5.2774e-07
355.07	0.00991593	-3.67496e-05	-0.0011239	2.45012e-05	-3.4899e-06	5.49349e-07
356.15	0.00985927	-4.08009e-05	-0.000663774	2.53424e-05	-3.41443e-06	5.71428e-07
357.23	0.009799	-4.49301e-05	-0.0001905	2.62017e-05	-3.33566e-06	5.94007e-07
358.31	0.00973509	-4.9138e-05	0.000296075	2.70793e-05	-3.25353e-06	6.17091e-07
359.39	0.00966735	-5.34259e-05	0.000796509	2.79758e-05	-3.16787e-06	6.40701e-07
360.46	0.0095959	-5.77944e-05	0.00131046	2.88909e-05	-3.07882e-06	6.64824e-07
361.54	0.00952102	-6.22427e-05	0.00183702	2.98236e-05	-2.98669e-06	6.8943e-07
362.61	0.00944262	-6.67724e-05	0.00237652	3.07743e-05	-2.8914e-06	7.14533e-07
363.68	0.00936065	-7.13845e-05	0.00292911	3.17432e-05	-2.79291e-06	7.40135e-07
364.76	0.00927511	-7.60792e-05	0.00349478	3.27302e-05	-2.69122e-06	7.66239e-07
365.84	0.00918588	-8.08567e-05	0.00407392	3.37358e-05	-2.5862e-06	7.92856e-07
366.94	0.00909301	-8.57172e-05	0.00466645	3.476e-05	-2.47789e-06	8.19986e-07
368.03	0.00899654	-9.06604e-05	0.0052722	3.58026e-05	-2.36633e-06	8.47622e-07
369.12	0.00889636	-9.56873e-05	0.00589156	3.68641e-05	-2.2514e-06	8.75777e-07
370.19	0.00879236	-0.0001008	0.00652483	3.79447e-05	-2.13303e-06	9.04463e-07
371.26	0.00868449	-0.000105997	0.00717224	3.90449e-05	-2.01113e-06	9.33687e-07
372.31	0.00857263	-0.000111281	0.00783415	4.01649e-05	-1.88559e-06	9.63461e-07
373.35	0.0084569	-0.000116652	0.00851018	4.13045e-05	-1.75654e-06	9.93774e-07
374.39	0.00833753	-0.000122109	0.00919963	4.24628e-05	-1.62425e-06	1.0246e-06
375.41	0.00821455	-0.000127654	0.0099024	4.36398e-05	-1.48877e-06	1.05594e-06
376.43	0.00808809	-0.000133286	0.0106181	4.4835e-05	-1.35025e-06	1.08779e-06
377.43	0.00795811	-0.000139006	0.0113469	4.60486e-05	-1.20866e-06	1.12013e-06
378.43	0.00782452	-0.000144814	0.0120891	4.7281e-05	-1.06387e-06	1.15299e-06
379.43	0.00768741	-0.000150712	0.0128443	4.85318e-05	-9.1602e-07	1.18636e-06
380.42	0.00754688	-0.000156698	0.0136123	4.98007e-05	-7.65205e-07	1.22023e-06
381.42	0.00740265	-0.000162775	0.014394	5.10889e-05	-6.11141e-07	1.25462e-06
382.41	0.00725437	-0.000168945	0.0151905	5.23975e-05	-4.53482e-07	1.28957e-06
383.41	0.00710181	-0.000175212	0.0160025	5.37274e-05	-2.91988e-07	1.32512e-06
384.41	0.00694461	-0.000181576	0.016831	5.50799e-05	-1.26269e-07	1.36129e-06
385.43	0.0067827	-0.000188039	0.0176765	5.64554e-05	4.37117e-08	1.39809e-06
386.45	0.00661618	-0.000194602	0.0185384	5.78535e-05	2.17838e-07	1.43552e-06
387.49	0.00644473	-0.000201266	0.0194179	5.92754e-05	3.96448e-07	1.47361e-06
388.54	0.00626807	-0.000208036	0.0203158	6.0722e-05	5.79812e-07	1.51239e-06
389.57	0.00608621	-0.000214909	0.0212321	6.21935e-05	7.67919e-07	1.55186e-06
390.59	0.00589911	-0.000221888	0.0221669	6.369e-05	9.60808e-07	1.59202e-06
391.61	0.00570676	-0.000228973	0.0231203	6.52116e-05	1.1585e-06	1.63288e-06
392.61	0.00550921	-0.000236163	0.0240921	6.67581e-05	1.36092e-06	1.67443e-06
393.62	0.00530615	-0.000243462	0.0250834	6.83306e-05	1.56839e-06	1.7167e-06
394.62	0.00509715	-0.000250872	0.0260954	6.99308e-05	1.78135e-06	1.75975e-06
395.62	0.0048821	-0.000258394	0.0271285	7.1559e-05	1.99991e-06	1.80357e-06
396.62	0.00466082	-0.00026603	0.0281832	7.3216e-05	2.22427e-06	1.8482e-06
397.63	0.00443342	-0.000273781	0.0292593	7.49014e-05	2.45428e-06	1.89362e-06
398.64	0.00420025	-0.000281644	0.0303557	7.6614e-05	2.68956e-06	1.93979e-06
399.66	0.0039613	-0.000289622	0.0314724	7.83538e-05	2.93012e-06	1.98672e-06
400.69	0.00371667	-0.000297714	0.032609	8.01205e-05	3.17581e-06	2.0344e-06
401.7	0.0034664	-0.000305921	0.0337656	8.1914e-05	3.42661e-06	2.08282e-06
402.71	0.00321038	-0.000314244	0.0349423	8.37348e-05	3.68261e-06	2.132e-06
403.71	0.00294882	-0.000322682	0.0361386	8.55821e-05	3.94359e-06	2.18192e-06
404.7	0.00268195	-0.000331236	0.0373539	8.74551e-05	4.20928e-06	2.23254e-06
405.69	0.00240944	-0.000339907	0.038589	8.9355e-05	4.48004e-06	2.28391e-06
406.68	0.00213085	-0.000348699	0.0398454	9.12836e-05	4.7563e-06	2.33608e-06
407.66	0.00184599	-0.000357613	0.0411237	9.32413e-05	5.03826e-06	2.38906e-06
408.63	0.00155449	-0.000366653	0.0424251	9.52298e-05	5.32632e-06	2.44289e-06
409.61	0.00125644	-0.000375817	0.0437492	9.72486e-05	5.62034e-06	2.49757e-06
410.58	0.000952213	-0.000385106	0.045095	9.92964e-05	5.91994e-06	2.55306e-06
411.55	0.000641551	-0.000394522	0.0464632	0.000101374	6.22536e-06	2.60938e-06
412.52	0.000324314	-0.000404065	0.0478543	0.000103483	6.53674e-06	2.66655e-06
413.49	4.3048e-07	-0.000413756	0.0492651	0.000105618	6.84755e-06	2.72417e-06
414.46	-0.000330371	-0.000423621	0.0506917	0.000107778	7.14858e-06	2.78168e-06
415.41	-0.000668113	-0.000433679	0.0521313	0.000109957	7.43413e-06	2.83874e-06
416.36	-0.00101279	-0.000443952	0.0535794	0.000112153	7.69567e-06	2.89482e-06
417.3	-0.00136467	-0.000454453	0.055035	0.000114363	7.9295e-06	2.94971e-06
418.24	-0.00172403	-0.000465189	0.0564982	0.000116589	8.13463e-06	3.00334e-06
419.18	-0.00209105	-0.000476187	0.0579648	0.000118826	8.30193e-06	3.05518e-06
420.12	-0.00246599	-0.000487473	0.0594313	0.00012107	8.42286e-06	3.1047e-06
421.06	-0.00284882	-0.000499048	0.0608972	0.000123321	8.49686e-06	3.15187e-06
422	-0.00323936	-0.000510914	0.062362	0.000125579	8.5236e-06	3.19667e-06
422.95	-0.00363771	-0.000523078	0.0638246	0.000127841	8.50056e-06	3.23894e-06
423.9	-0.00404388	-0.000535541	0.0652852	0.00013011	8.42809e-06	3.27871e-06
424.87	-0.004458	-0.000548329	0.0667396	0.00013238	8.29714e-06	3.31543e-06
425.84	-0.00488036	-0.000561481	0.0681819	0.000134645	8.09482e-06	3.34831e-06
426.8	-0.00531097	-0.000575007	0.0696106	0.000136904	7.8177e-06	3.37714e-06
427.75	-0.00574984	-0.000588924	0.0710226	0.000139153	7.45996e-06	3.40157e-06
428.68	-0.00619722	-0.000603235	0.0724185	0.000141394	7.02145e-06	3.4216e-06
429.6	-0.00665329	-0.000617926	0.0738017	0.00014363	6.50784e-06	3.43758e-06
430.52	-0.00711826	-0.000633009	0.0751714	0.00014586	5.91628e-06	3.44936e-06
431.43	-0.00759241	-0.000648488	0.0765278	0.000148084	5.24607e-06	3.4569e-06
432.34	-0.0080758	-0.000664367	0.0778706	0.000150303	4.49618e-06	3.46013e-06
433.24	-0.00856844	-0.000680659	0.0791977	0.000152515	3.66232e-06	3.45881e-06
434.15	-0.00907051	-0.00069736	0.0805106	0.00015472	2.74661e-06	3.45307e-06
435.05	-0.00958218	-0.000714466	0.0818112	0.00015692	1.75163e-06	3.44307e-06
435.96	-0.0101036	-0.000732007	0.0830943	0.000159112	6.66778e-07	3.42816e-06
436.87	-0.010635	-0.000750024	0.0843538	0.000161288	-5.2131e-07	3.40755e-06
437.79	-0.0111764	-0.000768536	0.0855863	0.000163445	-1.81982e-06	3.38078e-06
438.72	-0.0117281	-0.00078758	0.0867861	0.000165577	-3.24068e-06	3.34712e-06
439.66	-0.0122902	-0.000807158	0.0879533	0.000167684	-4.7847e-06	3.30655e-06
440.61	-0.0128629	-0.000827262	0.089091	0.00016977	-6.44691e-06	3.25936e-06
441.56	-0.0134464	-0.000847918	0.090195	0.00017183	-8.23667e-06	3.20501e-06
442.49	-0.0140409	-0.000869148	0.0912622	0.000173862	-1.01609e-05	3.14305e-06
443.42	-0.0146464	-0.000890943	0.0922943	0.000175867	-1.22161e-05	3.07373e-06
444.33	-0.0152627	-0.000913295	0.0932923	0.000177845	-1.43997e-05	2.99718e-06
445.25	-0.0158898	-0.000936197	0.0942578	0.0001798	-1.67084e-05	2.91361e-06
446.16	-0.0165276	-0.000959628	0.0951944	0.000181734	-1.91348e-05	2.82348e-06
447.07	-0.0171763	-0.000983603	0.0960997	0.000183645	-2.16841e-05	2.72647e-06
447.97	-0.0178359	-0.00100815	0.0969697	0.000185529	-2.43652e-05	2.62205e-06
448.88	-0.0185064	-0.00103326	0.097806	0.000187388	-2.71743e-05	2.51044e-06
449.8	-0.0191877	-0.00105892	0.098609	0.000189222	-3.01102e-05	2.39171e-06
450.71	-0.01988	-0.00108516	0.0993776	0.00019103	-3.3176e-05	2.26569e-06
451.63	-0.0205835	-0.00111197	0.100112	0.000192812	-3.6372e-05	2.13236e-06
452.56	-0.0212984	-0.00113936	0.100812	0.000194568	-3.97018e-05	1.99152e-06
453.49	-0.0220249	-0.00116735	0.101474	0.000196296	-4.31706e-05	1.84284e-06
454.41	-0.022763	-0.00119594	0.102101	0.000197996	-4.67747e-05	1.68658e-06
455.34	-0.0235124	-0.0012251	0.102694	0.000199672	-5.05083e-05	1.52306e-06
456.27	-0.0242734	-0.00125484	0.103255	0.000201324	-5.43721e-05	1.35225e-06
457.19	-0.0250459	-0.00128516	0.103783	0.000202953	-5.83643e-05	1.17428e-06
458.11	-0.0258301	-0.00131608	0.104275	0.000204554	-6.24951e-05	9.88513e-07
459.03	-0.0266265	-0.00134766	0.104722	0.00020612	-6.67816e-05	7.93924e-07
459.96	-0.0274351	-0.00137992	0.105123	0.000207647	-7.12301e-05	5.90128e-07
460.89	-0.0282562	-0.00141288	0.105471	0.000209131	-7.58513e-05	3.7647e-07
461.84	-0.0290899	-0.00144657	0.105764	0.000210568	-8.0651e-05	1.52604e-07
462.77	-0.0299365	-0.00148099	0.106003	0.000211961	-8.56295e-05	-8.14829e-08
463.7	-0.0307961	-0.00151618	0.106181	0.000213301	-9.08e-05	-3.2659e-07
464.62	-0.0316691	-0.00155218	0.106294	0.000214584	-9.61753e-05	-5.83494e-07
465.53	-0.0325555	-0.00158897	0.106343	0.000215812	-0.000101751	-8.51934e-07
466.45	-0.0334551	-0.00162655	0.10633	0.000216988	-0.000107521	-1.13153e-06
467.36	-0.0343679	-0.0016649	0.106257	0.000218112	-0.000113486	-1.42226e-06
468.25	-0.0352939	-0.00170402	0.106125	0.000219186	-0.000119638	-1.72374e-06
469.15	-0.0362332	-0.00174393	0.105931	0.000220207	-0.000125988	-2.0366e-06
470.03	-0.0371864	-0.00178469	0.105666	0.000221167	-0.000132554	-2.36192e-06
470.92	-0.0381534	-0.00182629	0.105332	0.000222065	-0.000139335	-2.69962e-06
471.8	-0.0391342	-0.00186875	0.104926	0.000222901	-0.000146334	-3.04987e-06
472.68	-0.040129	-0.00191205	0.10445	0.000223676	-0.000153548	-3.41256e-06
473.56	-0.0411379	-0.00195619	0.10391	0.000224397	-0.000160968	-3.78702e-06
474.42	-0.0421612	-0.00200115	0.103306	0.000225062	-0.000168594	-4.17333e-06
475.28	-0.043199	-0.00204694	0.102638	0.000225673	-0.000176426	-4.57145e-06
476.13	-0.0442514	-0.00209356	0.101909	0.000226234	-0.000184459	-4.98106e-06
476.99	-0.0453184	-0.00214099	0.101121	0.000226744	-0.000192692	-5.40204e-06
477.84	-0.0464002	-0.00218921	0.100276	0.000227209	-0.000201116	-5.83396e-06
478.7	-0.0474967	-0.00223821	0.0993805	0.000227632	-0.000209724	-6.27628e-06
479.56	-0.0486082	-0.00228801	0.0984299	0.000228011	-0.000218523	-6.72948e-06
480.43	-0.0497351	-0.00233865	0.0974188	0.00022834	-0.000227527	-7.19433e-06
481.31	-0.0508773	-0.00239014	0.0963463	0.000228617	-0.000236737	-7.67097e-06
482.18	-0.0520351	-0.00244249	0.0952087	0.00022884	-0.000246162	-8.15988e-06
483.06	-0.0532086	-0.00249571	0.0940089	0.00022901	-0.000255796	-8.66076e-06
483.94	-0.0543979	-0.00254975	0.0927539	0.000229137	-0.000265627	-9.17282e-06
484.8	-0.0556033	-0.00260463	0.0914415	0.000229216	-0.00027566	-9.69633e-06
485.66	-0.0568249	-0.00266036	0.0900714	0.000229249	-0.000285897	-1.02314e-05
486.51	-0.0580629	-0.00271695	0.0886437	0.000229235	-0.000296337	-1.07781e-05
487.35	-0.0593171	-0.0027744	0.0871553	0.000229171	-0.000306988	-1.13367e-05
488.19	-0.0605876	-0.00283272	0.0856072	0.000229058	-0.000317846	-1.19071e-05
489.03	-0.0618745	-0.00289191	0.0840004	0.000228897	-0.000328911	-1.24893e-05
489.87	-0.063178	-0.00295197	0.0823326	0.000228687	-0.000340187	-1.30835e-05
490.71	-0.0644982	-0.00301293	0.0806021	0.000228425	-0.00035168	-1.36901e-05
491.56	-0.0658352	-0.00307479	0.0788073	0.000228109	-0.000363393	-1.43091e-05
492.4	-0.067189	-0.00313757	0.0769457	0.000227738	-0.00037533	-1.4941e-05
493.25	-0.0685598	-0.00320126	0.0750205	0.000227315	-0.000387486	-1.55854e-05
494.09	-0.0699478	-0.00326584	0.073037	0.000226845	-0.000399853	-1.62416e-05
494.92	-0.0713531	-0.0033313	0.0709966	0.000226329	-0.000412427	-1.69097e-05
495.76	-0.072776	-0.00339763	0.0689023	0.000225772	-0.000425205	-1.75892e-05
496.59	-0.0742164	-0.00346483	0.0667538	0.000225172	-0.000438187	-1.82803e-05
497.42	-0.0756745	-0.00353293	0.0645481	0.000224527	-0.000451378	-1.89832e-05
498.25	-0.0771504	-0.00360191	0.0622883	0.00022384	-0.000464775	-1.96976e-05
499.08	-0.0786441	-0.00367176	0.0599765	0.000223113	-0.000478373	-2.04234e-05
499.91	-0.0801559	-0.00374252	0.0576069	0.00022234	-0.000492185	-2.11613e-05
500.73	-0.0816861	-0.00381424	0.0551724	0.000221514	-0.000506226	-2.19123e-05
501.55	-0.0832348	-0.00388694	0.0526682	0.000220631	-0.000520507	-2.26769e-05
502.37	-0.0848024	-0.00396069	0.0500861	0.000219682	-0.000535044	-2.34561e-05
503.19	-0.0863889	-0.00403547	0.0474256	0.000218666	-0.000549841	-2.42503e-05
504.01	-0.0879946	-0.0041113	0.0446891	0.000217586	-0.000564892	-2.5059e-05
504.83	-0.0896196	-0.00418821	0.0418698	0.000216436	-0.000580213	-2.58832e-05
505.64	-0.0912643	-0.00426623	0.0389621	0.000215208	-0.000595816	-2.67236e-05
506.44	-0.0929288	-0.00434538	0.0359664	0.000213905	-0.000611702	-2.75802e-05
507.25	-0.0946131	-0.00442565	0.0328818	0.000212525	-0.00062787	-2.84531e-05
508.05	-0.0963173	-0.00450705	0.029708	0.000211068	-0.000644325	-2.93425e-05
508.85	-0.0980416	-0.00458958	0.0264466	0.000209535	-0.000661061	-3.0248e-05
509.66	-0.0997861	-0.00467328	0.0230911	0.000207921	-0.000678094	-3.11707e-05
510.46	-0.101551	-0.00475821	0.0196322	0.000206215	-0.000695444	-3.21116e-05
511.26	-0.103337	-0.00484438	0.0160681	0.000204416	-0.000713114	-3.30711e-05
512.06	-0.105144	-0.00493182	0.0123947	0.000202519	-0.000731114	-3.40497e-05
512.87	-0.106972	-0.00502051	0.0086148	0.000200528	-0.000749439	-3.50471e-05
513.67	-0.10882	-0.00511042	0.00473657	0.000198451	-0.000768073	-3.60623e-05
514.47	-0.110691	-0.00520155	0.00076014	0.000196289	-0.000787018	-3.70954e-05
515.28	-0.112582	-0.00529389	-0.00331181	0.000194043	-0.000806267	-3.8146e-05
516.08	-0.114496	-0.00538744	-0.0074782	0.000191717	-0.000825821	-3.92142e-05
516.89	-0.116431	-0.00548222	-0.0117414	0.000189306	-0.000845685	-4.03001e-05
517.69	-0.118387	-0.0055782	-0.0160962	0.000186817	-0.000865849	-4.14033e-05
518.49	-0.120366	-0.00567536	-0.0205375	0.000184255	-0.000886302	-4.25231e-05
519.29	-0.122367	-0.00577374	-0.0250723	0.000181612	-0.000907062	-4.36604e-05
520.09	-0.12439	-0.00587339	-0.0297095	0.000178881	-0.000928146	-4.48164e-05
520.9	-0.126436	-0.00597436	-0.0344531	0.000176056	-0.000949563	-4.59916e-05
521.71	-0.128505	-0.00607667	-0.0393113	0.000173129	-0.000971331	-4.71872e-05
522.52	-0.130597	-0.00618034	-0.0442812	0.000170104	-0.000993445	-4.84027e-05
523.34	-0.132713	-0.00628531	-0.0493547	0.000166989	-0.00101589	-4.96372e-05
524.16	-0.134851	-0.00639161	-0.0545369	0.000163778	-0.00103868	-5.08915e-05
524.98	-0.137013	-0.00649928	-0.0598305	0.00016047	-0.00106181	-5.21658e-05
525.79	-0.139194	-0.00660772	-0.0652238	0.000157084	-0.00108525	-5.34632e-05
526.6	-0.141385	-0.00671614	-0.070704	0.000153646	-0.00110893	-5.47885e-05
527.41	-0.143582	-0.00682403	-0.0762597	0.000150174	-0.00113283	-5.61441e-05
528.2	-0.145779	-0.00693062	-0.0818739	0.000146698	-0.00115687	-5.75336e-05
529	-0.147971	-0.0070356	-0.0875445	0.000143224	-0.00118104	-5.89594e-05
529.78	-0.15016	-0.0071389	-0.0932743	0.000139751	-0.00120534	-6.04228e-05
530.57	-0.152336	-0.0072397	-0.0990488	0.000136307	-0.00122972	-6.19283e-05
531.35	-0.154492	-0.00733727	-0.104856	0.000132913	-0.00125411	-6.34803e-05
532.14	-0.15663	-0.00743154	-0.110694	0.000129574	-0.00127853	-6.50789e-05
532.93	-0.158748	-0.00752249	-0.116558	0.000126293	-0.00130296	-6.67238e-05
533.71	-0.160844	-0.00760991	-0.122446	0.000123079	-0.00132738	-6.84162e-05
534.5	-0.16292	-0.00769383	-0.128356	0.00011993	-0.0013518	-7.0156e-05
535.28	-0.164968	-0.00777344	-0.134274	0.000116874	-0.00137615	-7.19476e-05
536.06	-0.166977	-0.00784762	-0.14018	0.000113948	-0.00140036	-7.37972e-05
536.84	-0.168944	-0.00791605	-0.146067	0.000111164	-0.00142441	-7.57063e-05
537.61	-0.170865	-0.00797823	-0.151923	0.00010854	-0.00144824	-7.76775e-05
538.39	-0.172739	-0.00803415	-0.157753	0.000106074	-0.00147187	-7.97115e-05
539.16	-0.174573	-0.00808432	-0.163571	0.000103743	-0.00149535	-8.18067e-05
539.94	-0.176362	-0.00812851	-0.169375	0.000101553	-0.00151866	-8.39647e-05
540.71	-0.178107	-0.00816667	-0.17517	9.9502e-05	-0.00154182	-8.61869e-05
541.49	-0.179807	-0.00819871	-0.180953	9.75923e-05	-0.0015648	-8.84739e-05
542.3	-0.181459	-0.00822424	-0.186717	9.58387e-05	-0.0015876	-9.08273e-05
543.11	-0.183064	-0.00824348	-0.192468	9.42306e-05	-0.00161021	-9.32471e-05
543.92	-0.184625	-0.00825666	-0.198215	9.27572e-05	-0.00163268	-9.57326e-05
544.74	-0.186132	-0.00826284	-0.203939	9.14509e-05	-0.00165493	-9.82887e-05
545.56	-0.187576	-0.00826084	-0.209619	9.03519e-05	-0.00167688	-0.000100922
546.39	-0.18895	-0.00825003	-0.215241	8.94819e-05	-0.00169847	-0.000103635
547.2	-0.190245	-0.00822934	-0.220785	8.88783e-05	-0.00171962	-0.000106435
548.01	-0.191459	-0.00819873	-0.226253	8.85403e-05	-0.00174034	-0.000109321
548.82	-0.192598	-0.00815863	-0.231658	8.8448e-05	-0.00176067	-0.000112292
549.62	-0.193652	-0.00810824	-0.236985	8.86291e-05	-0.00178055	-0.000115354
550.42	-0.194618	-0.00804693	-0.242224	8.91029e-05	-0.00179994	-0.000118509
551.22	-0.195497	-0.00797502	-0.247381	8.98594e-05	-0.00181886	-0.000121755
552.02	-0.196293	-0.00789276	-0.252458	9.08933e-05	-0.00183733	-0.000125093
552.83	-0.197008	-0.00780043	-0.25746	9.21944e-05	-0.00185536	-0.000128519
553.65	-0.197649	-0.00769869	-0.2624	9.37404e-05	-0.00187302	-0.00013203
554.46	-0.198211	-0.00758709	-0.26727	9.55475e-05	-0.00189026	-0.00013563
555.26	-0.198687	-0.00746486	-0.272054	9.76416e-05	-0.00190703	-0.000139321
556.05	-0.199081	-0.00733232	-0.276758	0.000100013	-0.00192335	-0.000143104
556.82	-0.199394	-0.00718958	-0.281382	0.00010266	-0.00193923	-0.000146975
557.59	-0.199623	-0.00703638	-0.285924	0.000105589	-0.00195465	-0.000150938
558.35	-0.199768	-0.00687271	-0.290387	0.000108797	-0.00196963	-0.000154994
559.1	-0.199827	-0.00669825	-0.294767	0.000112295	-0.00198413	-0.000159144
559.85	-0.199794	-0.00651255	-0.299057	0.000116094	-0.00199813	-0.000163391
560.6	-0.199674	-0.00631595	-0.303265	0.000120183	-0.00201166	-0.000167734
561.35	-0.199472	-0.00610895	-0.307396	0.00012455	-0.00202476	-0.000172169
562.09	-0.199187	-0.00589152	-0.311452	0.000129193	-0.00203741	-0.000176698
562.84	-0.19882	-0.0056638	-0.315436	0.000134107	-0.00204964	-0.000181319
563.6	-0.198364	-0.00542491	-0.319334	0.00013932	-0.00206139	-0.000186038
564.36	-0.197804	-0.00517334	-0.323117	0.000144884	-0.00207253	-0.000190863
565.13	-0.197135	-0.00490853	-0.326776	0.000150815	-0.00208304	-0.000195796
565.91	-0.196349	-0.00462953	-0.330293	0.000157148	-0.00209284	-0.000200845
566.7	-0.19544	-0.00433585	-0.33366	0.000163897	-0.0021019	-0.00020601
567.48	-0.194409	-0.00402745	-0.336878	0.000171061	-0.00211021	-0.000211293
568.24	-0.193245	-0.00370319	-0.339928	0.000178679	-0.00211771	-0.000216701
569	-0.191937	-0.00336191	-0.34279	0.000186787	-0.0021243	-0.000222239
569.75	-0.190489	-0.00300402	-0.345471	0.000195373	-0.00213002	-0.000227906
570.49	-0.188907	-0.00263007	-0.347979	0.000204419	-0.0021349	-0.000233699
571.22	-0.187191	-0.00224008	-0.350316	0.000213925	-0.00213896	-0.000239618
571.96	-0.185345	-0.00183461	-0.352491	0.000223872	-0.00214222	-0.000245659
572.69	-0.183363	-0.00141277	-0.35449	0.00023429	-0.00214463	-0.000251828
573.42	-0.181229	-0.000972963	-0.356283	0.000245231	-0.00214607	-0.000258134
574.16	-0.178944	-0.000515313	-0.357873	0.000256692	-0.00214656	-0.000264576
574.9	-0.176507	-3.95846e-05	-0.359256	0.00026868	-0.00214607	-0.000271156
575.64	-0.173918	0.000454061	-0.360437	0.000281187	-0.00214462	-0.000277873
576.39	-0.171187	0.00096468	-0.36144	0.000294177	-0.00214229	-0.000284723
577.15	-0.168313	0.00149237	-0.362265	0.000307651	-0.00213909	-0.000291708
577.92	-0.165295	0.00203707	-0.362918	0.000321603	-0.00213502	-0.000298828
578.7	-0.16214	0.00259835	-0.363408	0.000336017	-0.00213013	-0.00030608
579.48	-0.158847	0.003176	-0.36374	0.000350887	-0.00212442	-0.000313465
580.25	-0.155424	0.00376942	-0.363929	0.000366188	-0.00211795	-0.000320979
581.02	-0.151877	0.00437781	-0.363994	0.00038189	-0.00211079	-0.00032862
581.78	-0.1482	0.00500187	-0.363922	0.000398016	-0.00210289	-0.000336391
582.53	-0.144382	0.00564274	-0.363693	0.000414604	-0.00209417	-0.000344298
583.29	-0.140423	0.0063006	-0.363305	0.000431659	-0.00208461	-0.000352343
584.04	-0.136315	0.00697616	-0.362745	0.000449205	-0.00207416	-0.00036053
584.8	-0.132062	0.00766898	-0.362025	0.000467223	-0.00206287	-0.000368857
585.55	-0.127675	0.00837791	-0.361172	0.00048567	-0.00205083	-0.000377319
586.32	-0.12315	0.00910337	-0.360181	0.000504559	-0.00203802	-0.000385919
587.08	-0.118486	0.00984553	-0.35905	0.000523892	-0.00202442	-0.000394658
587.85	-0.113683	0.0106044	-0.357781	0.000543669	-0.00201004	-0.000403537
588.62	-0.108737	0.0113804	-0.356362	0.000563911	-0.00199484	-0.000412558
589.37	-0.103647	0.0121736	-0.354795	0.000584612	-0.00197883	-0.00042172
590.13	-0.0984173	0.0129836	-0.353084	0.000605767	-0.00196203	-0.000431023
590.88	-0.0930426	0.0138111	-0.351223	0.000627389	-0.0019444	-0.00044047
591.62	-0.0875193	0.0146563	-0.349204	0.000649491	-0.00192591	-0.000450063
592.37	-0.081845	0.0155195	-0.347023	0.000672084	-0.00190656	-0.000459804
593.12	-0.0760155	0.0164013	-0.34467	0.000695184	-0.00188629	-0.000469695
593.87	-0.0700355	0.0173011	-0.342158	0.00071877	-0.00186516	-0.000479734
594.62	-0.063913	0.018218	-0.33951	0.000742809	-0.00184324	-0.000489918
595.38	-0.0576494	0.0191519	-0.33673	0.000767292	-0.00182056	-0.000500247
596.14	-0.051249	0.0201024	-0.333833	0.000792199	-0.00179714	-0.000510718
596.89	-0.0447113	0.0210695	-0.330818	0.000817534	-0.001773	-0.000521334
597.63	-0.0380316	0.0220537	-0.327674	0.000843315	-0.00174809	-0.000532096
598.35	-0.0312142	0.0230546	-0.324411	0.000869524	-0.00172245	-0.000543003
599.07	-0.0242623	0.0240719	-0.32104	0.000896147	-0.00169611	-0.000554053
599.78	-0.0171657	0.0251065	-0.317539	0.000923223	-0.00166899	-0.000565252
600.49	-0.00991169	0.02616	-0.313883	0.000950796	-0.00164099	-0.000576609
601.19	-0.00249186	0.0272333	-0.310055	0.000978898	-0.00161204	-0.000588127
601.89	0.00510765	0.0283278	-0.306025	0.00100758	-0.00158202	-0.000599815
602.59	0.0128886	0.0294436	-0.301792	0.00103685	-0.00155094	-0.000611674
603.29	0.0208474	0.0305806	-0.297367	0.00106669	-0.00151882	-0.000623704
603.98	0.0289964	0.0317399	-0.292724	0.00109715	-0.00148556	-0.00063591
604.69	0.0373454	0.0329227	-0.287845	0.00112826	-0.0014511	-0.0006483
605.39	0.0458942	0.0341289	-0.282731	0.00116001	-0.00141543	-0.000660873
606.1	0.054644	0.0353587	-0.277379	0.00119243	-0.00137853	-0.000673631
606.82	0.063596	0.0366122	-0.271788	0.0012255	-0.00134042	-0.000686574
607.55	0.0727476	0.0378891	-0.265965	0.00125921	-0.00130111	-0.000699701
608.28	0.0821104	0.0391907	-0.259887	0.00129362	-0.0012605	-0.00071302
609.01	0.0917005	0.0405188	-0.253519	0.00132878	-0.00121847	-0.00072654
609.73	0.101521	0.0418737	-0.246856	0.0013647	-0.00117499	-0.000740262
610.44	0.11158	0.0432563	-0.239883	0.00140141	-0.00113	-0.000754192
611.14	0.121873	0.044666	-0.232612	0.00143889	-0.00108355	-0.000768327
611.83	0.132387	0.0461015	-0.225074	0.00147709	-0.00103574	-0.000782661
612.53	0.143121	0.0475628	-0.217272	0.00151601	-0.00098659	-0.000797196
613.21	0.154074	0.0490496	-0.209217	0.00155563	-0.000936125	-0.000811929
613.9	0.165242	0.0505616	-0.200913	0.00159594	-0.000884365	-0.000826861
614.58	0.176631	0.0520994	-0.192353	0.00163697	-0.000831277	-0.000841995
615.27	0.188232	0.0536621	-0.183557	0.00167867	-0.000776932	-0.000857326
615.96	0.200038	0.0552488	-0.174545	0.00172102	-0.000721406	-0.000872851
616.65	0.21206	0.0568609	-0.165293	0.00176406	-0.0006646	-0.000888577
617.34	0.224314	0.0585	-0.155767	0.00180784	-0.000606385	-0.000904513
618.07	0.236807	0.060167	-0.145953	0.00185241	-0.000546707	-0.000920663
618.83	0.249553	0.0618633	-0.135823	0.00189779	-0.00048545	-0.000937036
619.59	0.262549	0.0635885	-0.125387	0.00194399	-0.000422653	-0.00095363
620.36	0.275781	0.0653413	-0.114677	0.00199095	-0.000358433	-0.000970438
621.13	0.289259	0.0671226	-0.103676	0.00203869	-0.000292718	-0.000987467
621.89	0.302987	0.0689329	-0.0923746	0.00208725	-0.00022547	-0.00100472
622.65	0.316936	0.0707672	-0.0808023	0.00213647	-0.000156691	-0.00102215
623.4	0.331072	0.0726187	-0.0689874	0.00218619	-8.63339e-05	-0.00103968
624.17	0.345366	0.0744828	-0.0569598	0.00223629	-1.44161e-05	-0.00105729
624.94	0.359778	0.0763525	-0.0447658	0.00228658	5.90278e-05	-0.0010749
625.7	0.3743	0.0782255	-0.0324056	0.00233699	0.000134064	-0.00109249
626.45	0.388933	0.0801019	-0.0198664	0.00238755	0.000210766	-0.00111006
627.2	0.403641	0.0819748	-0.00718283	0.00243807	0.000289154	-0.00112754
627.94	0.418391	0.0838379	0.0056195	0.00248839	0.000369278	-0.00114486
628.68	0.433178	0.0856908	0.0185323	0.00253849	0.000451117	-0.00116204
629.42	0.447997	0.0875325	0.0315379	0.00258834	0.000534613	-0.00117905
630.15	0.462837	0.0893614	0.0446283	0.00263791	0.000619781	-0.00119589
630.89	0.477702	0.0911778	0.0578024	0.00268718	0.000706616	-0.00121256
631.63	0.492551	0.0929746	0.0710224	0.00273599	0.000795127	-0.00122899
632.37	0.507331	0.0947422	0.0842422	0.00278407	0.000885353	-0.0012451
633.12	0.522028	0.0964776	0.0974414	0.00283135	0.000977278	-0.00126084
633.88	0.536612	0.0981764	0.11059	0.00287771	0.00107088	-0.00127619
634.63	0.551091	0.0998389	0.123702	0.00292316	0.00116624	-0.00129114
635.39	0.565499	0.101471	0.13682	0.00296785	0.00126341	-0.00130574
636.14	0.579828	0.10307	0.149941	0.00301174	0.00136246	-0.00131998
636.89	0.594084	0.104637	0.163083	0.00305484	0.00146345	-0.00133384
637.62	0.608264	0.106171	0.17624	0.00309715	0.00156639	-0.00134733
638.34	0.622347	0.107668	0.189389	0.00313856	0.00167128	-0.00136041
639.05	0.63635	0.109132	0.202553	0.00317914	0.00177816	-0.0013731
639.75	0.65029	0.110564	0.215755	0.00321896	0.00188709	-0.00138542
640.45	0.664121	0.111956	0.228949	0.00325781	0.00199807	-0.0013973
641.14	0.677785	0.113299	0.242081	0.00329542	0.00211112	-0.00140864
641.83	0.691253	0.114586	0.25512	0.00333163	0.00222625	-0.00141938
642.52	0.704469	0.115808	0.268012	0.0033662	0.00234345	-0.00142944
643.2	0.717438	0.116965	0.280766	0.00339914	0.00246278	-0.00143882
643.89	0.73019	0.118062	0.293421	0.00343057	0.0025843	-0.00144756
644.58	0.742685	0.119091	0.305941	0.00346031	0.00270804	-0.00145558
645.27	0.754897	0.120048	0.318302	0.00348823	0.00283403	-0.00146285
645.97	0.766841	0.120936	0.330517	0.0035144	0.00296227	-0.00146938
646.67	0.778524	0.121755	0.342584	0.00353885	0.0030927	-0.00147519
647.38	0.789964	0.122509	0.354518	0.00356166	0.00322534	-0.00148032
648.1	0.801192	0.123204	0.366349	0.00358298	0.00336019	-0.00148481
648.82	0.812186	0.123836	0.378051	0.00360269	0.00349723	-0.00148863
649.56	0.82291	0.124397	0.389592	0.00362064	0.00363649	-0.00149172
650.28	0.833378	0.124891	0.400979	0.00363687	0.00377794	-0.00149409
650.99	0.843593	0.125318	0.412209	0.00365141	0.00392156	-0.00149577
651.69	0.853548	0.125677	0.423281	0.00366422	0.00406739	-0.00149673
652.38	0.863247	0.125968	0.434205	0.0036753	0.0042155	-0.00149698
653.07	0.872678	0.126189	0.444974	0.0036846	0.00436591	-0.00149648
653.76	0.881825	0.126335	0.455577	0.00369203	0.00451867	-0.0014952
654.44	0.890703	0.126411	0.466024	0.00369766	0.00467378	-0.00149317
655.12	0.899333	0.126419	0.476328	0.00370159	0.00483118	-0.00149044
655.8	0.907717	0.12636	0.486492	0.00370382	0.00499091	-0.001487
656.48	0.915865	0.126236	0.496528	0.0037044	0.00515299	-0.00148286
657.16	0.923734	0.126039	0.506395	0.00370313	0.00531743	-0.00147795
657.85	0.931255	0.125756	0.516032	0.00369966	0.00548429	-0.00147215
658.54	0.938402	0.125382	0.525414	0.00369387	0.00565359	-0.00146542
659.23	0.945128	0.124908	0.534495	0.00368555	0.00582532	-0.00145766
659.93	0.951412	0.124332	0.543261	0.00367459	0.00599954	-0.00144886
660.64	0.957258	0.123653	0.551716	0.003661	0.00617628	-0.00143899
661.36	0.962611	0.12286	0.559812	0.00364452	0.00635557	-0.00142798
662.1	0.967419	0.121946	0.567505	0.0036249	0.00653747	-0.00141572
662.84	0.971702	0.120912	0.574808	0.00360222	0.00672196	-0.00140226
663.59	0.975484	0.119763	0.58174	0.00357661	0.00690901	-0.00138762
664.34	0.978768	0.118501	0.588303	0.00354807	0.00709863	-0.00137183
665.09	0.981582	0.117129	0.594519	0.00351672	0.00729081	-0.00135493
665.82	0.983883	0.11564	0.60035	0.00348238	0.00748558	-0.00133683
666.55	0.985599	0.114021	0.605732	0.00344468	0.00768299	-0.00131742
667.26	0.986735	0.112273	0.610666	0.00340365	0.00788305	-0.0012967
667.97	0.98728	0.110393	0.615141	0.00335924	0.00808574	-0.00127466
668.68	0.987248	0.108384	0.619178	0.0033115	0.00829114	-0.0012513
669.38	0.986692	0.106254	0.622835	0.00326068	0.00849929	-0.00122672
670.07	0.985614	0.104004	0.626118	0.00320676	0.00871026	-0.0012009
670.77	0.984023	0.101633	0.629048	0.00314979	0.0089241	-0.00117385
671.46	0.981944	0.0991476	0.631648	0.00308989	0.00914085	-0.00114562
672.15	0.979386	0.096548	0.633925	0.00302708	0.0093605	-0.00111621
672.85	0.976388	0.0938407	0.635924	0.00296154	0.00958311	-0.00108568
673.54	0.972993	0.0910333	0.637692	0.00289346	0.00980873	-0.00105409
674.24	0.96917	0.0881195	0.6392	0.0028227	0.0100374	-0.0010214
674.95	0.964866	0.08509	0.640402	0.002749	0.0102691	-0.000987514
675.66	0.960074	0.0819432	0.641291	0.00267232	0.0105039	-0.000952408
676.37	0.954761	0.0786729	0.641836	0.0025925	0.0107419	-0.000916028
677.1	0.948954	0.0752838	0.642072	0.00250967	0.010983	-0.000878415
677.81	0.942721	0.0717867	0.64207	0.00242412	0.0112273	-0.000839666
678.51	0.936042	0.0681783	0.641819	0.00233577	0.0114749	-0.000799748
679.2	0.928916	0.0644575	0.641321	0.00224459	0.0117259	-0.000758649
679.88	0.921343	0.0606246	0.640575	0.00215058	0.0119802	-0.000716372
680.55	0.913296	0.0566746	0.639547	0.00205362	0.0122378	-0.000672871
681.21	0.904782	0.052609	0.638247	0.00195374	0.0124987	-0.00062816
681.87	0.895813	0.0484293	0.636684	0.00185097	0.012763	-0.000582253
682.52	0.886367	0.0441317	0.634837	0.00174523	0.0130306	-0.000535114
683.17	0.876429	0.0397132	0.632697	0.00163643	0.0133016	-0.000486711
683.82	0.865985	0.0351711	0.630246	0.0015245	0.0135761	-0.000437022
684.47	0.855012	0.0305013	0.627459	0.00140933	0.0138539	-0.000386007
685.11	0.84354	0.0257088	0.624373	0.00129105	0.0141351	-0.000333711
685.76	0.831622	0.0208022	0.62105	0.00116991	0.0144199	-0.00028021
686.41	0.81927	0.0157831	0.617505	0.00104595	0.0147083	-0.000225518
687.06	0.806514	0.0106565	0.613779	0.000919294	0.0150003	-0.000169675
687.72	0.793354	0.00542181	0.609868	0.000789941	0.0152959	-0.000112678
688.38	0.779761	7.42416e-05	0.605739	0.000657756	0.0155953	-5.44823e-05
689.05	0.765763	-0.00538166	0.601426	0.000522864	0.0158983	4.87144e-06
689.72	0.751383	-0.0109424	0.596956	0.000385359	0.016205	6.53528e-05
690.41	0.736566	-0.0166177	0.592274	0.000244985	0.0165155	0.000127053
691.1	0.721248	-0.0224194	0.58732	0.000101433	0.0168298	0.000190085
691.78	0.705384	-0.0283554	0.58205	-4.55095e-05	0.0171478	0.000254523
692.45	0.688899	-0.0344392	0.576389	-0.000196196	0.0174697	0.000320492
693.11	0.671788	-0.0406719	0.570338	-0.000350655	0.0177953	0.000388006
693.76	0.654077	-0.0470496	0.563925	-0.00050878	0.0181249	0.000457031
694.42	0.635702	-0.0535839	0.55709	-0.000670873	0.0184584	0.000527675
695.06	0.616612	-0.0602839	0.549788	-0.000837173	0.0187958	0.000600027
695.71	0.596812	-0.0671492	0.542021	-0.00100767	0.0191372	0.000674083
696.35	0.576293	-0.0741813	0.533781	-0.00118241	0.0194825	0.000749856
696.99	0.555053	-0.0813808	0.525068	-0.0013614	0.0198319	0.000827355
697.63	0.533109	-0.0887452	0.515898	-0.00154457	0.0201853	0.000906555
698.27	0.5104	-0.0962853	0.506214	-0.00173222	0.0205427	0.000987561
698.91	0.48684	-0.104017	0.495933	-0.00192474	0.0209041	0.00107052
699.56	0.462414	-0.111942	0.485039	-0.00212221	0.0212697	0.00115545
700.21	0.437083	-0.120069	0.473495	-0.00232483	0.0216393	0.00124243
700.88	0.410876	-0.128392	0.461335	-0.00253247	0.0220131	0.00133141
701.58	0.38387	-0.136898	0.448642	-0.00274477	0.0223911	0.00142228
702.29	0.356067	-0.145588	0.435423	-0.00296173	0.0227733	0.00151504
702.99	0.327494	-0.154458	0.421712	-0.00318324	0.0231599	0.00160964
703.7	0.298162	-0.163505	0.40752	-0.00340925	0.0235508	0.00170609
704.4	0.268049	-0.172734	0.392828	-0.00363987	0.0239461	0.00180441
705.1	0.237205	-0.182137	0.37769	-0.00387488	0.0243459	0.00190454
705.81	0.20568	-0.191704	0.36216	-0.00411405	0.0247501	0.00200639
706.51	0.173409	-0.201449	0.346177	-0.00435769	0.0251589	0.00211008
707.22	0.140308	-0.211385	0.329657	-0.00460619	0.0255721	0.00221575
707.92	0.106343	-0.22152	0.312569	-0.00485973	0.0259899	0.00232346
708.63	0.0714368	-0.231866	0.294835	-0.00511866	0.0264123	0.00243333
709.33	0.0356179	-0.24242	0.27649	-0.00538287	0.0268393	0.00254533
710.03	-0.00103557	-0.253168	0.257617	-0.00565199	0.0272709	0.00265934
710.74	-0.0385712	-0.26412	0.238173	-0.00592627	0.0277072	0.00277544
711.44	-0.0770129	-0.275278	0.218135	-0.0062058	0.0281483	0.00289367
712.15	-0.116246	-0.286616	0.197578	-0.0064902	0.0285929	0.00301383
712.85	-0.156142	-0.298101	0.176564	-0.00677903	0.0290393	0.00313567
713.56	-0.196592	-0.309707	0.155169	-0.0070719	0.0294864	0.003259
714.26	-0.23743	-0.321395	0.133505	-0.0073682	0.0299326	0.00338353
714.96	-0.27863	-0.333156	0.111571	-0.00766788	0.0303772	0.0035092
715.66	-0.320218	-0.344995	0.0893353	-0.0079711	0.0308201	0.00363604
716.36	-0.362052	-0.356874	0.0668803	-0.00827737	0.0312595	0.00376381
717.04	-0.404013	-0.368763	0.0442657	-0.00858631	0.0316937	0.00389227
717.71	-0.446079	-0.380659	0.0215145	-0.00889782	0.0321227	0.0040214
718.38	-0.488209	-0.392553	-0.00132556	-0.00921172	0.0325466	0.00415114
719.04	-0.530366	-0.404438	-0.024234	-0.00952791	0.0329648	0.00428141
719.7	-0.572552	-0.416314	-0.047205	-0.00984639	0.0333776	0.00441223
720.35	-0.614618	-0.428145	-0.0701482	-0.0101666	0.0337831	0.00454334
721	-0.656368	-0.439881	-0.0929549	-0.010488	0.0341791	0.00467435
721.65	-0.697729	-0.451507	-0.115574	-0.0108102	0.0345647	0.00480515
722.3	-0.738594	-0.462995	-0.13793	-0.0111328	0.0349391	0.00493555
722.95	-0.778996	-0.474352	-0.16006	-0.011456	0.0353021	0.0050656
723.61	-0.819077	-0.485611	-0.182061	-0.0117805	0.0356548	0.00519556
724.27	-0.858815	-0.496763	-0.203933	-0.012106	0.0359967	0.00532539
724.94	-0.898243	-0.507815	-0.225713	-0.0124329	0.0363276	0.00545514
725.62	-0.93735	-0.518762	-0.247391	-0.0127611	0.0366473	0.0055848
726.3	-0.976048	-0.529585	-0.268904	-0.0130903	0.0369552	0.00571422
726.97	-1.01441	-0.5403	-0.29031	-0.0134208	0.0372515	0.00584353
727.65	-1.05251	-0.550923	-0.311662	-0.0137529	0.0375368	0.00597285
728.32	-1.09017	-0.561409	-0.332849	-0.0140859	0.0378091	0.00610187
728.99	-1.12716	-0.571705	-0.353743	-0.0144191	0.0380659	0.00623018
729.66	-1.16338	-0.581783	-0.37427	-0.0147521	0.0383058	0.00635757
730.31	-1.19861	-0.59159	-0.394298	-0.0150841	0.0385266	0.00648364
730.96	-1.23286	-0.60113	-0.413849	-0.0154153	0.0387281	0.00660844
731.61	-1.26627	-0.610431	-0.433016	-0.0157461	0.0389114	0.0067322
732.26	-1.29869	-0.619456	-0.45171	-0.0160761	0.0390745	0.00685464
732.9	-1.33002	-0.62818	-0.46988	-0.0164049	0.0392163	0.00697558
733.55	-1.36031	-0.636617	-0.487548	-0.0167327	0.0393374	0.00709513
734.2	-1.38958	-0.644774	-0.504708	-0.0170596	0.0394384	0.00721333
734.85	-1.41789	-0.652664	-0.521391	-0.0173857	0.03952	0.0073303
735.51	-1.44535	-0.660319	-0.537665	-0.0177116	0.0395836	0.00744627
736.17	-1.47188	-0.667717	-0.553469	-0.0180368	0.0396283	0.00756107
736.84	-1.49734	-0.674824	-0.568721	-0.018361	0.0396525	0.00767446
737.52	-1.52178	-0.681651	-0.583439	-0.0186842	0.0396568	0.00778652
738.2	-1.54519	-0.688203	-0.597609	-0.0190065	0.0396417	0.00789728
738.88	-1.56756	-0.694471	-0.611226	-0.0193278	0.0396065	0.00800669
739.56	-1.58891	-0.70046	-0.624322	-0.0196483	0.0395512	0.00811479
740.24	-1.60919	-0.706158	-0.636871	-0.0199679	0.0394751	0.00822152
740.91	-1.62836	-0.711549	-0.648849	-0.0202863	0.0393772	0.00832676
741.59	-1.64646	-0.716648	-0.66028	-0.0206038	0.0392583	0.00843061
742.27	-1.66356	-0.721473	-0.671185	-0.0209206	0.0391195	0.00853323
742.95	-1.67966	-0.726027	-0.681574	-0.0212367	0.0389609	0.00863462
743.63	-1.69482	-0.730317	-0.691469	-0.0215524	0.0387826	0.00873486
744.31	-1.70886	-0.734305	-0.700776	-0.0218669	0.0385829	0.00883366
744.99	-1.72153	-0.737924	-0.709349	-0.0221796	0.0383584	0.00893053
745.67	-1.73272	-0.741148	-0.717125	-0.02249	0.0381081	0.00902528
746.35	-1.74226	-0.743936	-0.723998	-0.0227974	0.0378298	0.0091176
747.03	-1.75006	-0.746266	-0.729927	-0.0231017	0.0375225	0.00920733
747.71	-1.75616	-0.748142	-0.734926	-0.023403	0.0371862	0.00929452
748.38	-1.76033	-0.749511	-0.73888	-0.0237005	0.0368183	0.00937879
749.04	-1.76239	-0.750326	-0.74168	-0.0239936	0.0364165	0.00945977
749.71	-1.76241	-0.750603	-0.743359	-0.0242825	0.0359816	0.0095376
750.38	-1.76047	-0.750366	-0.743955	-0.0245675	0.0355148	0.00961244
751.05	-1.75658	-0.749617	-0.743468	-0.0248488	0.0350162	0.00968433
751.72	-1.75084	-0.748381	-0.741951	-0.0251265	0.0344872	0.00975346
752.39	-1.74308	-0.746618	-0.739312	-0.0254002	0.0339257	0.00981952
753.06	-1.73304	-0.74426	-0.735396	-0.025669	0.0333284	0.00988202
753.74	-1.72074	-0.74131	-0.730206	-0.0259329	0.0326956	0.00994098
754.41	-1.70612	-0.737759	-0.723712	-0.0261918	0.0320267	0.00999634
755.07	-1.68925	-0.73362	-0.715963	-0.0264459	0.0313221	0.0100482
755.73	-1.67034	-0.728942	-0.707098	-0.0266961	0.0305838	0.010097
756.37	-1.6494	-0.723726	-0.697132	-0.0269423	0.0298115	0.0101427
757.01	-1.62648	-0.717981	-0.686115	-0.027185	0.0290054	0.0101853
757.65	-1.60168	-0.711731	-0.674101	-0.0274243	0.0281664	0.0102252
758.28	-1.57503	-0.704983	-0.661105	-0.0276605	0.027295	0.0102623
758.91	-1.54668	-0.697774	-0.64723	-0.0278942	0.0263924	0.010297
759.53	-1.51681	-0.690144	-0.632592	-0.028126	0.0254603	0.0103295
760.16	-1.48529	-0.682062	-0.617118	-0.0283554	0.0244972	0.0103596
760.79	-1.45192	-0.67348	-0.600697	-0.0285819	0.0235008	0.010387
761.42	-1.41669	-0.664391	-0.583315	-0.0288054	0.0224705	0.0104116
762.06	-1.37947	-0.654763	-0.564892	-0.0290254	0.021405	0.0104333
762.7	-1.34036	-0.644622	-0.545514	-0.0292424	0.0203051	0.0104521
763.35	-1.29964	-0.63403	-0.525352	-0.0294573	0.0191732	0.0104686
764.01	-1.25723	-0.62297	-0.504375	-0.0296701	0.0180085	0.0104827
764.67	-1.21314	-0.611439	-0.48259	-0.0298807	0.0168105	0.0104943
765.35	-1.16737	-0.599438	-0.459992	-0.0300892	0.0155794	0.0105036
766.01	-1.11979	-0.58694	-0.436497	-0.030295	0.0143141	0.0105102
766.67	-1.07045	-0.573953	-0.412124	-0.0304985	0.0130148	0.0105142
767.31	-1.01937	-0.560485	-0.386891	-0.0306996	0.011682	0.0105157
767.95	-0.96648	-0.546518	-0.36075	-0.0308981	0.0103147	0.0105146
768.58	-0.911719	-0.532035	-0.333675	-0.0310939	0.00891202	0.0105107
769.21	-0.855031	-0.517023	-0.305622	-0.0312868	0.00747347	0.010504
769.84	-0.796318	-0.50146	-0.276525	-0.0314764	0.00599807	0.0104943
770.46	-0.735711	-0.485375	-0.246478	-0.0316632	0.00448683	0.0104818
771.08	-0.673421	-0.468817	-0.215623	-0.0318481	0.00294159	0.010467
771.7	-0.609502	-0.451797	-0.184001	-0.0320313	0.00136265	0.0104498
772.33	-0.544082	-0.434344	-0.151707	-0.0322133	-0.000249059	0.0104306
772.96	-0.47715	-0.416455	-0.118731	-0.0323941	-0.00189365	0.0104093
773.59	-0.408591	-0.398104	-0.084989	-0.0325733	-0.00357216	0.0103858
774.22	-0.338521	-0.379318	-0.0505628	-0.0327513	-0.00528365	0.0103602
774.87	-0.267028	-0.360116	-0.015511	-0.0329285	-0.00702738	0.0103327
775.52	-0.193903	-0.340447	0.020294	-0.0331041	-0.0088057	0.0103029
776.18	-0.118899	-0.320251	0.0569977	-0.0332774	-0.0106215	0.0102705
776.84	-0.0418433	-0.299485	0.0947084	-0.0334477	-0.0124768	0.0102349
777.5	0.0375575	-0.278078	0.133609	-0.0336139	-0.0143747	0.0101958
778.15	0.119314	-0.256025	0.173699	-0.0337761	-0.0163157	0.0101532
778.81	0.203327	-0.233349	0.214908	-0.0339347	-0.0182989	0.0101071
779.46	0.289838	-0.209991	0.257382	-0.0340888	-0.0203271	0.0100571
780.12	0.379039	-0.185903	0.301233	-0.0342377	-0.0224027	0.010003
780.77	0.470918	-0.161087	0.346454	-0.0343816	-0.0245255	0.00994466
781.42	0.565504	-0.135537	0.39307	-0.0345203	-0.0266959	0.00988212
782.07	0.66281	-0.109248	0.441084	-0.0346539	-0.0289142	0.00981534
782.72	0.76277	-0.0822378	0.490455	-0.0347826	-0.0311797	0.00974444
783.37	0.865619	-0.054447	0.541327	-0.0349055	-0.0334952	0.009669
784.02	0.971681	-0.0257962	0.593895	-0.0350215	-0.0358642	0.00958842
784.68	1.08102	0.00373134	0.648202	-0.0351305	-0.0382877	0.00950258
785.33	1.19379	0.0341711	0.704337	-0.0352319	-0.0407673	0.00941122
785.98	1.30988	0.0654973	0.762224	-0.0353261	-0.043302	0.00931454
786.64	1.42896	0.0976371	0.82166	-0.0354144	-0.0458888	0.00921313
787.3	1.55104	0.130588	0.88263	-0.0354968	-0.048528	0.00910699
787.95	1.676	0.164327	0.945058	-0.0355738	-0.0512187	0.00899634
788.61	1.8038	0.198843	1.00891	-0.0356455	-0.0539605	0.00888126
789.28	1.93452	0.234156	1.07424	-0.0357117	-0.0567545	0.00876159
789.94	2.06797	0.270221	1.14093	-0.0357731	-0.0595988	0.00863771
790.6	2.20394	0.306991	1.20883	-0.0358305	-0.0624916	0.00850998
791.25	2.34269	0.344527	1.2781	-0.035883	-0.0654356	0.00837795
791.91	2.48453	0.382909	1.34895	-0.0359295	-0.0684346	0.00824102
792.55	2.62961	0.422169	1.42144	-0.0359696	-0.0714901	0.00809894
793.19	2.77821	0.462379	1.49577	-0.0360021	-0.0746053	0.00795119
793.82	2.93024	0.503514	1.57185	-0.0360275	-0.0777794	0.00779797
794.44	3.08537	0.545501	1.64949	-0.0360471	-0.0810094	0.00763985
795.06	3.24378	0.588384	1.72879	-0.0360601	-0.0842973	0.0074765
795.67	3.40558	0.632187	1.80981	-0.0360663	-0.0876445	0.00730775
796.28	3.57068	0.676814	1.89238	-0.0360652	-0.0910436	0.00713384
796.88	3.73912	0.722163	1.97636	-0.0360553	-0.0944858	0.00695484
797.48	3.9108	0.768142	2.0616	-0.0360362	-0.0979646	0.00677103
798.09	4.08554	0.814611	2.14784	-0.0360075	-0.10147	0.00658283
798.69	4.26349	0.861555	2.23509	-0.0359683	-0.104999	0.00639007
799.3	4.4448	0.909	2.32343	-0.0359177	-0.108553	0.00619246
799.91	4.62944	0.95683	2.41267	-0.0358548	-0.112122	0.00599019
800.52	4.81746	1.00495	2.5027	-0.0357781	-0.115699	0.00578332
801.14	5.00879	1.05334	2.59347	-0.0356879	-0.119281	0.00557198
801.76	5.20327	1.10197	2.68485	-0.0355847	-0.122869	0.00535646
802.4	5.40091	1.1508	2.7768	-0.0354684	-0.126458	0.00513678
803.03	5.60169	1.19983	2.86932	-0.035339	-0.130051	0.00491299
803.66	5.80554	1.24895	2.9622	-0.0351955	-0.133637	0.00468533
804.3	6.01244	1.29799	3.0552	-0.0350364	-0.137203	0.00445403
804.92	6.22232	1.34689	3.14822	-0.0348614	-0.140744	0.0042193
805.54	6.43507	1.39556	3.24109	-0.0346703	-0.144256	0.00398139
806.16	6.65084	1.44404	3.33388	-0.0344624	-0.147738	0.00374004
806.76	6.86987	1.49245	3.42684	-0.0342377	-0.151199	0.00349475
807.37	7.09225	1.54077	3.51996	-0.0339954	-0.154637	0.00324539
807.97	7.31816	1.58903	3.61334	-0.0337349	-0.158053	0.00299165
808.56	7.54761	1.63724	3.70696	-0.0334559	-0.161447	0.00273353
809.16	7.78049	1.68531	3.80067	-0.0331583	-0.164814	0.00247128
809.76	8.01699	1.73331	3.89462	-0.0328419	-0.168157	0.00220455
810.36	8.25724	1.7813	3.98892	-0.0325063	-0.171481	0.00193305
810.96	8.50115	1.82915	4.08333	-0.0321507	-0.174773	0.00165711
811.56	8.74864	1.87666	4.17758	-0.0317734	-0.178021	0.00137707
812.17	8.99965	1.92373	4.27149	-0.0313738	-0.181217	0.00109313
812.79	9.25405	1.97021	4.36478	-0.0309508	-0.184346	0.000805742
813.41	9.51196	2.01609	4.45749	-0.0305038	-0.187411	0.000514668
814.04	9.77361	2.0615	4.54985	-0.0300326	-0.190417	0.000219436
814.69	10.039	2.10632	4.64167	-0.0295363	-0.193356	-7.97373e-05
815.34	10.308	2.15046	4.73282	-0.0290138	-0.196221	-0.000382782
815.99	10.5808	2.19397	4.82337	-0.0284657	-0.199015	-0.000689746
816.65	10.8572	2.23686	4.91329	-0.0278927	-0.201741	-0.00100048
817.31	11.1372	2.27918	5.00265	-0.0272951	-0.204402	-0.0013151
817.98	11.4209	2.32103	5.09161	-0.0266739	-0.207007	-0.0016338
818.65	11.7083	2.36233	5.18003	-0.0260286	-0.20955	-0.00195639
819.3	11.9993	2.40298	5.26773	-0.0253582	-0.212022	-0.00228267
819.96	12.2938	2.443	5.35475	-0.0246633	-0.214427	-0.00261261
820.61	12.5919	2.4824	5.44105	-0.0239445	-0.216765	-0.00294611
821.26	12.8935	2.52116	5.52664	-0.0232011	-0.219035	-0.00328327
821.9	13.1988	2.55931	5.61159	-0.0224324	-0.221237	-0.00362435
822.54	13.5079	2.59682	5.69584	-0.021638	-0.223369	-0.00396936
823.18	13.8208	2.63363	5.77935	-0.0208168	-0.225426	-0.00431835
823.82	14.1375	2.66981	5.86217	-0.0199694	-0.227412	-0.00467137
824.46	14.458	2.70539	5.94435	-0.019097	-0.229333	-0.00502834
825.09	14.7823	2.74039	6.02591	-0.0181993	-0.231189	-0.00538937
825.72	15.1105	2.77485	6.1069	-0.0172763	-0.232981	-0.0057546
826.34	15.4425	2.80862	6.18712	-0.0163269	-0.234701	-0.00612377
826.96	15.7782	2.8415	6.26624	-0.0153488	-0.23633	-0.0064966
827.58	16.1178	2.8734	6.34414	-0.0143415	-0.237862	-0.00687293
828.2	16.461	2.90418	6.42057	-0.0133037	-0.239285	-0.00725244
828.81	16.8079	2.93379	6.49546	-0.0122345	-0.240595	-0.00763515
829.43	17.1586	2.96222	6.56884	-0.0111337	-0.241791	-0.00802116
830.04	17.5131	2.98933	6.64045	-0.00999958	-0.242861	-0.00841024
830.66	17.8714	3.01494	6.71006	-0.00883049	-0.243791	-0.00880219
831.27	18.2334	3.03912	6.77775	-0.00762704	-0.244586	-0.00919706
831.88	18.5991	3.06194	6.84359	-0.00639025	-0.245253	-0.00959489
832.47	18.9686	3.0834	6.90759	-0.00512012	-0.245792	-0.0099957
833.06	19.3419	3.10359	6.96987	-0.00381748	-0.24621	-0.0103996
833.65	19.7189	3.12237	7.03021	-0.00248107	-0.246496	-0.0108065
834.23	20.0996	3.13953	7.0883	-0.00110863	-0.246633	-0.0112159
834.81	20.484	3.15507	7.14413	0.000299608	-0.246621	-0.0116279
835.39	20.872	3.16897	7.19764	0.00174386	-0.246459	-0.0120424
835.97	21.2639	3.18127	7.24894	0.00322445	-0.246148	-0.0124597
836.54	21.6599	3.19215	7.29835	0.00474078	-0.245703	-0.0128804
837.12	22.06	3.20164	7.34592	0.00629344	-0.245123	-0.0133046
837.71	22.4645	3.20977	7.39177	0.00788301	-0.244412	-0.0137328
838.29	22.8734	3.21663	7.43601	0.00950908	-0.243574	-0.014165
838.88	23.2868	3.22224	7.47868	0.0111713	-0.242612	-0.0146014
839.47	23.7048	3.22674	7.52003	0.0128696	-0.241536	-0.0150424
840.08	24.1277	3.23027	7.56031	0.0146034	-0.240356	-0.0154885
840.7	24.5554	3.23274	7.59937	0.0163737	-0.239064	-0.0159395
841.32	24.9879	3.23398	7.63697	0.0181821	-0.237647	-0.0163952
841.95	25.4252	3.23399	7.67307	0.020029	-0.236104	-0.0168557
842.57	25.8674	3.23264	7.70751	0.0219152	-0.234426	-0.0173207
843.21	26.3145	3.23004	7.74048	0.0238408	-0.232621	-0.0177906
843.83	26.7669	3.22643	7.77238	0.0258051	-0.230703	-0.0182662
844.46	27.2245	3.22173	7.80313	0.0278089	-0.228669	-0.0187474
845.08	27.6877	3.21597	7.83277	0.0298528	-0.226518	-0.0192344
845.72	28.1562	3.20914	7.86129	0.0319368	-0.22425	-0.0197272
846.36	28.63	3.20114	7.88848	0.0340611	-0.221858	-0.0202255
847.01	29.1092	3.19199	7.91441	0.0362257	-0.219345	-0.0207294
847.65	29.5937	3.18173	7.93911	0.0384303	-0.216713	-0.0212389
848.29	30.0836	3.1703	7.96247	0.0406757	-0.213956	-0.021754
848.92	30.5789	3.15765	7.98446	0.0429626	-0.211071	-0.0222747
849.55	31.0795	3.14373	8.00495	0.0452911	-0.208055	-0.0228008
850.17	31.5854	3.12847	8.02383	0.0476618	-0.204901	-0.0233322
850.79	32.0968	3.11197	8.04128	0.0500745	-0.201617	-0.0238692
851.41	32.614	3.09442	8.05766	0.052529	-0.198216	-0.0244126
852.02	33.1371	3.07586	8.07305	0.0550255	-0.194701	-0.0249625
852.64	33.6663	3.05642	8.08768	0.0575642	-0.19108	-0.0255194
853.26	34.2016	3.03607	8.10152	0.0601451	-0.187351	-0.0260834
853.87	34.7429	3.01473	8.11439	0.0627685	-0.183507	-0.0266541
854.49	35.2904	2.99249	8.12648	0.0654343	-0.179557	-0.027232
855.11	35.8442	2.96943	8.13792	0.0681426	-0.175505	-0.0278172
855.73	36.4042	2.94538	8.14844	0.0708946	-0.171338	-0.0284095
856.35	36.9704	2.92013	8.1577	0.0736921	-0.167039	-0.0290084
856.97	37.5426	2.89355	8.16548	0.0765362	-0.162598	-0.0296138
857.59	38.1207	2.86539	8.17137	0.0794285	-0.157997	-0.030225
858.2	38.7048	2.83565	8.17537	0.0823696	-0.153233	-0.0308422
858.82	39.2951	2.80441	8.17764	0.0853595	-0.148313	-0.0314656
859.44	39.8914	2.77147	8.17788	0.0883999	-0.143222	-0.032095
860.07	40.4937	2.73668	8.17582	0.0914921	-0.137946	-0.03273
860.7	41.102	2.70004	8.17149	0.0946364	-0.132487	-0.0333708
861.34	41.7164	2.66155	8.16484	0.0978328	-0.126842	-0.0340173
861.95	42.3369	2.62118	8.15586	0.101082	-0.121011	-0.0346695
862.54	42.9635	2.57899	8.14464	0.104383	-0.114999	-0.0353277
863.12	43.5962	2.5348	8.13088	0.107738	-0.10879	-0.0359913
863.69	44.2349	2.48833	8.11414	0.111149	-0.102362	-0.03666
864.25	44.8794	2.43953	8.09433	0.114617	-0.0957123	-0.0373337
864.81	45.5299	2.38828	8.07124	0.118142	-0.0888311	-0.038012
865.37	46.1863	2.33468	8.04506	0.121724	-0.081725	-0.0386953
865.92	46.8491	2.27899	8.01625	0.125363	-0.0744133	-0.0393846
866.48	47.5184	2.22123	7.98485	0.129059	-0.0668963	-0.0400798
867.04	48.1943	2.16148	7.95104	0.132812	-0.0591805	-0.0407815
867.62	48.8769	2.0998	7.9149	0.136622	-0.0512684	-0.0414898
868.2	49.5662	2.0361	7.8763	0.140489	-0.0431549	-0.0422046
868.8	50.2625	1.97057	7.83555	0.144413	-0.0348518	-0.0429264
869.42	50.966	1.90337	7.79294	0.148394	-0.0263716	-0.0436558
870.02	51.6765	1.83429	7.74814	0.152434	-0.0176981	-0.0443924
870.62	52.3938	1.76308	7.70071	0.156533	-0.00881068	-0.0451355
871.2	53.1181	1.6896	7.65047	0.160694	0.000299332	-0.0458851
871.78	53.8491	1.61364	7.59702	0.164918	0.00965079	-0.0466405
872.35	54.5869	1.53527	7.54053	0.169204	0.019237	-0.0474022
872.92	55.3319	1.45477	7.48147	0.173553	0.0290387	-0.048171
873.49	56.0841	1.37199	7.41959	0.177965	0.0390677	-0.0489465
874.06	56.8435	1.28685	7.35479	0.18244	0.04933	-0.0497288
874.64	57.6101	1.19974	7.28732	0.186971	0.0598053	-0.050516
875.23	58.3837	1.11112	7.21734	0.191541	0.0704735	-0.0513054
875.83	59.1646	1.02134	7.14513	0.196143	0.0813147	-0.0520955
876.45	59.9527	0.930978	7.07112	0.200764	0.092298	-0.0528842
877.07	60.748	0.840125	6.99522	0.205399	0.103422	-0.0536701
877.7	61.5504	0.748705	6.91724	0.210046	0.114695	-0.0544527
878.31	62.36	0.657209	6.83744	0.214693	0.126093	-0.0552293
878.93	63.1765	0.566043	6.75594	0.219327	0.137598	-0.0559973
879.54	64.0003	0.475286	6.67288	0.223946	0.149204	-0.0567567
880.13	64.8314	0.385087	6.58851	0.228552	0.160902	-0.057508
880.71	65.6699	0.29557	6.50289	0.233139	0.172686	-0.0582506
881.27	66.5159	0.206738	6.41606	0.237709	0.184556	-0.0589847
881.82	67.3695	0.119104	6.32832	0.24225	0.196487	-0.0597078
882.36	68.2305	0.0333377	6.23998	0.24674	0.208446	-0.060416
882.91	69.0991	-0.0503169	6.15125	0.251175	0.220419	-0.0611087
883.46	69.9753	-0.131482	6.06242	0.255546	0.232387	-0.0617844
884.02	70.8591	-0.210266	5.9733	0.259854	0.244359	-0.0624429
884.59	71.7505	-0.28713	5.88345	0.264108	0.256363	-0.0630853
885.17	72.6494	-0.361996	5.79284	0.268306	0.268398	-0.0637107
885.74	73.5559	-0.434964	5.70124	0.272446	0.280473	-0.0643186
886.29	74.4699	-0.505983	5.60868	0.276528	0.292586	-0.0649087
886.87	75.3915	-0.574753	5.51541	0.280545	0.304722	-0.0654801
887.48	76.3209	-0.641511	5.42118	0.284501	0.316895	-0.0660331
888.1	77.2579	-0.706492	5.32574	0.288402	0.329122	-0.0665684
888.72	78.2026	-0.769083	5.22948	0.292231	0.341371	-0.0670829
889.35	79.1549	-0.82854	5.1328	0.295968	0.353605	-0.067573
890	80.1149	-0.884451	5.03596	0.299602	0.365802	-0.0680365
890.67	81.0827	-0.9361	4.93942	0.303114	0.377927	-0.0684704
891.32	82.0581	-0.983541	4.84304	0.306506	0.389984	-0.0688742
891.95	83.0413	-1.02719	4.74643	0.309784	0.402	-0.0692489
892.57	84.0321	-1.06654	4.64987	0.312936	0.413949	-0.0695919
893.23	85.0306	-1.10125	4.55349	0.31595	0.425816	-0.0699011
893.88	86.0369	-1.13149	4.45724	0.318834	0.43761	-0.0701779
894.53	87.0512	-1.15731	4.36123	0.32159	0.449332	-0.0704233
895.18	88.0736	-1.1789	4.26535	0.324226	0.460992	-0.0706384
895.83	89.1043	-1.19667	4.16939	0.326751	0.472611	-0.0708255
896.49	90.1433	-1.2103	4.07358	0.32916	0.484173	-0.0709833
897.13	91.1907	-1.21932	3.97817	0.331438	0.495655	-0.0711092
897.75	92.2465	-1.22387	3.88316	0.333593	0.507064	-0.0712048
898.37	93.311	-1.22395	3.78864	0.335625	0.518399	-0.0712706
899.01	94.3842	-1.21948	3.69458	0.337531	0.529657	-0.0713056
899.66	95.466	-1.21055	3.6008	0.339311	0.540848	-0.0713095
900.28	96.5564	-1.19699	3.50736	0.340961	0.551964	-0.0712813
900.89	97.6555	-1.17859	3.41428	0.342472	0.562997	-0.0712192
901.51	98.7633	-1.15553	3.32152	0.343853	0.573958	-0.0711246
902.12	99.8801	-1.12803	3.22908	0.34511	0.584854	-0.0709997
902.73	101.006	-1.09612	3.13691	0.346245	0.59569	-0.0708441
903.35	102.141	-1.0599	3.04492	0.34726	0.606472	-0.0706584
903.97	103.285	-1.01884	2.9534	0.34814	0.617174	-0.0704398
904.61	104.438	-0.972037	2.86279	0.348859	0.627753	-0.0701832
905.26	105.6	-0.919134	2.77329	0.349409	0.63819	-0.0698868
905.94	106.772	-0.859528	2.68526	0.349773	0.648457	-0.0695477
906.6	107.952	-0.792953	2.59879	0.349943	0.65854	-0.0691641
907.24	109.141	-0.719443	2.5138	0.349918	0.668445	-0.0687359
907.87	110.34	-0.638302	2.43065	0.34968	0.678138	-0.0682592
908.48	111.547	-0.54887	2.34964	0.349209	0.687587	-0.0677303
909.09	112.764	-0.451359	2.27069	0.348512	0.696803	-0.0671506
909.7	113.99	-0.346057	2.19375	0.347599	0.7058	-0.0665222
910.31	115.225	-0.232982	2.11879	0.346471	0.71458	-0.0658454
910.94	116.47	-0.112466	2.04568	0.345138	0.723159	-0.0651221
911.58	117.725	0.0160439	1.97471	0.343586	0.731512	-0.0643494
912.23	118.989	0.153484	1.90633	0.341786	0.739592	-0.063522
912.88	120.262	0.299806	1.84055	0.339741	0.747403	-0.0626404
913.53	121.546	0.455172	1.77749	0.337449	0.754937	-0.0617042
914.19	122.839	0.61938	1.71691	0.334911	0.762207	-0.0607134
914.86	124.142	0.791724	1.65828	0.332146	0.769254	-0.0596709
915.55	125.454	0.972181	1.60148	0.329151	0.776081	-0.0585762
916.19	126.776	1.16059	1.54626	0.32593	0.782701	-0.057429
916.81	128.108	1.35664	1.49242	0.322489	0.789131	-0.0562308
917.42	129.45	1.56023	1.43994	0.318834	0.795377	-0.0549824
918.01	130.802	1.77086	1.3884	0.314975	0.801468	-0.0536854
918.6	132.164	1.98794	1.33734	0.310926	0.807438	-0.0523423
919.2	133.535	2.2119	1.287	0.306676	0.813266	-0.0509507
919.89	134.917	2.4434	1.23771	0.302207	0.818919	-0.049507
920.56	136.309	2.68255	1.1895	0.297514	0.824395	-0.0480105
921.18	137.71	2.92979	1.14263	0.292586	0.829671	-0.046459
921.79	139.122	3.18474	1.09675	0.287432	0.834772	-0.0448536
922.4	140.544	3.44652	1.05118	0.282072	0.839745	-0.0431977
923.02	141.976	3.71535	1.00599	0.276499	0.844582	-0.0414897
923.63	143.418	3.99127	0.961111	0.270712	0.849285	-0.0397291
924.23	144.87	4.27426	0.916557	0.26471	0.853853	-0.0379159
924.83	146.333	4.56476	0.872678	0.258486	0.858266	-0.0360488
925.44	147.805	4.86265	0.829386	0.252041	0.862529	-0.0341282
926.06	149.289	5.16782	0.786641	0.245379	0.866649	-0.0321549
926.7	150.783	5.48054	0.744586	0.238494	0.870614	-0.0301275
927.36	152.287	5.80103	0.703265	0.231378	0.874416	-0.0280444
928.02	153.802	6.12949	0.662852	0.224026	0.878043	-0.0259051
928.66	155.328	6.46624	0.623595	0.216432	0.881479	-0.0237081
929.28	156.865	6.81088	0.585105	0.208605	0.88475	-0.0214549
929.89	158.413	7.16268	0.546802	0.20056	0.887896	-0.0191478
930.49	159.971	7.52149	0.508497	0.1923	0.890929	-0.0167872
931.08	161.541	7.88687	0.469779	0.183836	0.893875	-0.014374
931.68	163.121	8.25888	0.430691	0.175165	0.896733	-0.0119083
932.29	164.712	8.63791	0.391561	0.166279	0.89948	-0.00938869
932.91	166.314	9.02358	0.352055	0.157187	0.902142	-0.00681638
933.55	167.928	9.41561	0.311931	0.147895	0.904733	-0.00419238
934.21	169.552	9.81472	0.271618	0.138385	0.90722	-0.0015132
934.9	171.188	10.2217	0.231581	0.128633	0.909559	0.00122556
935.58	172.835	10.6373	0.192191	0.118624	0.911722	0.00402672
936.25	174.493	11.0623	0.154086	0.108331	0.913656	0.00689487
936.93	176.163	11.497	0.117212	0.0977528	0.915363	0.00983078
937.63	177.843	11.9408	0.0812714	0.086896	0.916862	0.0128335
938.31	179.535	12.3948	0.0467494	0.0757383	0.918111	0.0159071
938.99	181.239	12.8594	0.0139932	0.0642616	0.919079	0.0190552
939.68	182.953	13.3348	-0.0170262	0.0524667	0.919769	0.0222776
940.37	184.68	13.821	-0.046217	0.0403514	0.920175	0.0255747
941.08	186.417	14.3181	-0.07359	0.0279139	0.920298	0.0289468
941.8	188.167	14.8258	-0.0993032	0.0151597	0.920149	0.0323933
942.48	189.928	15.345	-0.122878	0.00206728	0.919689	0.0359179
943.13	191.701	15.8767	-0.143667	-0.0113931	0.918862	0.0395262
943.75	193.485	16.4213	-0.161531	-0.0252277	0.917657	0.0432195
944.36	195.282	16.9792	-0.176163	-0.0394495	0.916048	0.047
944.96	197.09	17.55	-0.187891	-0.0540503	0.914059	0.0508667
945.55	198.91	18.1327	-0.197478	-0.0690048	0.911746	0.0548153
946.14	200.742	18.7274	-0.205022	-0.0843132	0.909115	0.0588461
946.74	202.586	19.3335	-0.210856	-0.099968	0.906187	0.0629583
947.38	204.442	19.951	-0.215109	-0.115966	0.902972	0.0671513
948.05	206.31	20.5802	-0.217606	-0.132314	0.899455	0.0714265
948.68	208.19	21.2204	-0.218853	-0.148998	0.895675	0.0757815
949.29	210.082	21.871	-0.219358	-0.166001	0.891668	0.0802136
949.9	211.987	22.5328	-0.218603	-0.183345	0.887392	0.0847272
950.51	213.903	23.2069	-0.215923	-0.20106	0.882791	0.0893274
951.12	215.833	23.8938	-0.211054	-0.219159	0.877842	0.0940167
951.75	217.774	24.5946	-0.203366	-0.237668	0.872493	0.0987998
952.4	219.728	25.3087	-0.19318	-0.256578	0.866768	0.103676
953.07	221.694	26.0353	-0.181267	-0.275864	0.860724	0.10864
953.79	223.672	26.7749	-0.167271	-0.295543	0.85433	0.113696
954.55	225.663	27.5278	-0.15105	-0.315624	0.847572	0.118845
955.32	227.666	28.2933	-0.132664	-0.336011	0.840498	0.124077
956.08	229.678	29.0707	-0.111842	-0.356579	0.833147	0.129376
956.85	231.7	29.8592	-0.0887381	-0.37724	0.825569	0.134733
957.61	233.73	30.6575	-0.0635903	-0.397865	0.817836	0.140131
958.37	235.768	31.4658	-0.0360666	-0.418411	0.809947	0.145567
959.09	237.812	32.2845	-0.00581679	-0.438877	0.80188	0.151041
959.8	239.863	33.1127	0.0272539	-0.459133	0.793687	0.156538
960.51	241.918	33.95	0.0633943	-0.479063	0.785406	0.162046
961.23	243.978	34.7959	0.102411	-0.498656	0.777051	0.167563
961.94	246.042	35.65	0.143866	-0.517898	0.768657	0.173086
962.65	248.111	36.5122	0.187779	-0.536755	0.760235	0.178613
963.35	250.184	37.3823	0.234028	-0.555231	0.75179	0.184144
964.05	252.26	38.2594	0.282623	-0.573197	0.74338	0.189664
964.76	254.337	39.1424	0.333781	-0.590471	0.735073	0.195151
965.46	256.414	40.0308	0.387326	-0.606999	0.726904	0.2006
966.17	258.491	40.9236	0.443101	-0.622696	0.718922	0.205999
966.88	260.568	41.8214	0.501409	-0.637569	0.711102	0.211352
967.6	262.645	42.7255	0.562586	-0.651716	0.703378	0.216671
968.3	264.722	43.6359	0.626848	-0.665103	0.695751	0.221952
969	266.8	44.5532	0.694581	-0.677735	0.688195	0.227198
969.7	268.877	45.4773	0.765757	-0.689598	0.680715	0.232407
970.39	270.953	46.4076	0.840179	-0.700627	0.673354	0.237572
971.09	273.029	47.3447	0.91813	-0.710864	0.666072	0.242698
971.78	275.104	48.2895	0.999809	-0.720357	0.658835	0.247793
972.47	277.179	49.2407	1.0852	-0.72895	0.651713	0.252838
973.16	279.249	50.1968	1.17436	-0.736453	0.644789	0.25781
973.86	281.315	51.1573	1.26729	-0.742761	0.638111	0.262697
974.56	283.374	52.1205	1.36386	-0.7477	0.631764	0.267479
975.27	285.426	53.0868	1.46433	-0.751266	0.625732	0.272156
975.97	287.473	54.0575	1.56904	-0.753547	0.619955	0.27674
976.67	289.512	55.0315	1.67804	-0.75441	0.614488	0.281215
977.36	291.543	56.0085	1.79147	-0.753759	0.609365	0.285571
978.05	293.566	56.9886	1.90919	-0.751645	0.60457	0.289813
978.74	295.582	57.9717	2.03085	-0.748098	0.600111	0.293946
979.42	297.59	58.9584	2.1564	-0.743169	0.595967	0.297975
980.11	299.594	59.9494	2.28571	-0.736964	0.592094	0.301914
980.79	301.591	60.9441	2.4187	-0.729409	0.588532	0.305754
981.48	303.58	61.9416	2.55543	-0.720378	0.585334	0.309481
982.17	305.563	62.9421	2.69566	-0.709922	0.582489	0.3131
982.86	307.538	63.9455	2.83913	-0.698053	0.580007	0.316613
983.56	309.507	64.9519	2.98606	-0.684737	0.577889	0.320017
984.26	311.468	65.9616	3.13671	-0.669978	0.576115	0.323313
984.96	313.421	66.9745	3.29117	-0.653732	0.574701	0.326497
985.65	315.366	67.9905	3.44967	-0.635929	0.57366	0.329561
986.33	317.303	69.0098	3.61204	-0.616625	0.572977	0.332512
987.01	319.233	70.0327	3.77789	-0.595895	0.572642	0.335359
987.69	321.155	71.0593	3.94734	-0.573735	0.572646	0.338102
988.36	323.072	72.09	4.12039	-0.550175	0.572976	0.340745
989.04	324.979	73.1239	4.29711	-0.525072	0.573691	0.343271
989.72	326.876	74.1592	4.47776	-0.498183	0.574885	0.345654
990.4	328.761	75.1955	4.66231	-0.469421	0.576597	0.347881
991.08	330.633	76.2316	4.85079	-0.438629	0.578896	0.349935
991.77	332.49	77.2671	5.04334	-0.405733	0.581807	0.351809
992.46	334.332	78.3022	5.24008	-0.370732	0.585321	0.353502
993.16	336.158	79.3358	5.44115	-0.333441	0.589511	0.354993
993.85	337.966	80.3668	5.64677	-0.293682	0.594445	0.356262
994.54	339.756	81.3955	5.85678	-0.251516	0.600103	0.357316
995.22	341.529	82.4223	6.07089	-0.207029	0.606463	0.358165
995.9	343.286	83.4474	6.28907	-0.160227	0.613523	0.358811
996.58	345.027	84.4715	6.51116	-0.1112	0.62125	0.359265
997.25	346.75	85.4934	6.73724	-0.0598033	0.629704	0.35951
997.93	348.454	86.5116	6.96757	-0.00578547	0.638981	0.359516
998.6	350.138	87.5263	7.20203	0.0508361	0.649081	0.359287
999.28	351.802	88.537	7.44055	0.1101	0.660024	0.358818
999.97	353.447	89.5445	7.68338	0.171969	0.671776	0.358113
1000.7	355.073	90.5504	7.93079	0.236282	0.684248	0.357195
1001.3	356.681	91.5551	8.18299	0.303046	0.697427	0.356062
1002	358.27	92.5591	8.44035	0.37224	0.711282	0.354719
1002.7	359.843	93.5632	8.70289	0.443788	0.725776	0.353175
1003.4	361.398	94.5676	8.97049	0.517662	0.740901	0.351433
1004.1	362.938	95.5736	9.24342	0.593749	0.756589	0.349509
1004.8	364.463	96.5825	9.52188	0.671912	0.772764	0.347419
1005.4	365.972	97.5937	9.80594	0.752264	0.789473	0.345151
1006.1	367.464	98.6059	10.0957	0.834984	0.806787	0.342684
1006.8	368.938	99.6191	10.3913	0.920101	0.824715	0.340015
1007.5	370.392	100.633	10.6927	1.00773	0.843306	0.337131
1008.2	371.829	101.647	11.0002	1.09779	0.862507	0.334043
1008.8	373.248	102.665	11.314	1.19007	0.882204	0.330776
1009.5	374.651	103.686	11.6344	1.28465	0.902417	0.327323
1010.2	376.037	104.71	11.9616	1.38154	0.92314	0.323682
1010.9	377.405	105.738	12.2955	1.48074	0.944377	0.319855
1011.6	378.755	106.767	12.6357	1.58235	0.966184	0.31583
1012.3	380.087	107.8	12.9825	1.68633	0.988545	0.311611
1012.9	381.401	108.835	13.3355	1.79266	1.01145	0.307202
1013.6	382.697	109.873	13.695	1.90141	1.03494	0.302594
1014.3	383.974	110.913	14.0611	2.01264	1.05901	0.297782
1014.9	385.232	111.954	14.4335	2.1264	1.0837	0.292761
1015.6	386.469	112.997	14.8122	2.24277	1.10906	0.28752
1016.3	387.687	114.042	15.1976	2.36165	1.13502	0.282072
1017	388.887	115.091	15.5898	2.48289	1.16148	0.276437
1017.7	390.069	116.144	15.9892	2.60647	1.18843	0.270619
1018.5	391.235	117.204	16.3961	2.73228	1.21579	0.264631
1019.3	392.384	118.269	16.8104	2.86034	1.24358	0.258471
1020.1	393.515	119.339	17.2319	2.99075	1.27185	0.252129
1020.9	394.629	120.414	17.6609	3.12341	1.30055	0.245615
1021.7	395.727	121.496	18.0974	3.25827	1.32963	0.238938
1022.5	396.806	122.584	18.5415	3.39551	1.35918	0.232078
1023.3	397.865	123.675	18.9932	3.53534	1.3893	0.225007
1024.1	398.902	124.769	19.4525	3.67793	1.42005	0.217709
1024.9	399.914	125.863	19.9193	3.8235	1.45154	0.210155
1025.6	400.901	126.958	20.3938	3.9721	1.48379	0.202343
1026.4	401.863	128.055	20.8761	4.12365	1.51673	0.194281
1027.2	402.799	129.151	21.3663	4.27836	1.55047	0.185945
1028	403.705	130.247	21.8645	4.43641	1.58508	0.177316
1028.8	404.583	131.341	22.3707	4.59779	1.62055	0.168393
1029.6	405.433	132.435	22.8848	4.76252	1.6569	0.159176
1030.4	406.253	133.527	23.4069	4.93063	1.69413	0.149662
1031.2	407.044	134.618	23.9371	5.10206	1.73221	0.139858
1032	407.805	135.708	24.4752	5.27702	1.77124	0.12974
1032.8	408.532	136.793	25.0214	5.45579	1.81133	0.119275
1033.6	409.224	137.874	25.5756	5.63844	1.85253	0.108456
1034.4	409.88	138.949	26.1378	5.82509	1.89488	0.0972678
1035.2	410.502	140.02	26.7083	6.01566	1.93833	0.085722
1036	411.091	141.088	27.2873	6.20991	1.98276	0.0738482
1036.8	411.647	142.155	27.875	6.40785	2.02815	0.0616473
1037.6	412.171	143.22	28.4717	6.60939	2.07445	0.0491291
1038.4	412.663	144.286	29.0775	6.81451	2.12165	0.036298
1039.2	413.123	145.35	29.6923	7.02328	2.16977	0.0231455
1040.1	413.552	146.415	30.3165	7.23555	2.21873	0.00969058
1040.9	413.952	147.482	30.9502	7.45118	2.26844	-0.00404736
1041.7	414.32	148.549	31.5934	7.67038	2.31901	-0.0180937
1042.5	414.654	149.616	32.2461	7.89342	2.37056	-0.0324812
1043.3	414.951	150.679	32.9083	8.12043	2.42314	-0.0472237
1044.1	415.209	151.739	33.5799	8.35167	2.47688	-0.0623509
1044.9	415.43	152.795	34.2612	8.58704	2.53171	-0.0778524
1045.7	415.615	153.85	34.9524	8.82632	2.58751	-0.0936978
1046.5	415.763	154.903	35.6537	9.06965	2.64435	-0.109906
1047.3	415.873	155.953	36.365	9.31714	2.70226	-0.126486
1048.1	415.947	157.001	37.0859	9.56855	2.76124	-0.143341
1048.9	415.988	158.046	37.8152	9.8237	2.82136	-0.160347
1049.7	415.997	159.089	38.5525	10.0824	2.88262	-0.177415
1050.5	415.979	160.131	39.2971	10.3442	2.94498	-0.194413
1051.3	415.934	161.17	40.0485	10.6092	3.00851	-0.211301
1052.1	415.86	162.206	40.8067	10.8776	3.0733	-0.228079
1052.8	415.76	163.238	41.5707	11.149	3.13937	-0.244617
1053.6	415.637	164.266	42.3396	11.4232	3.20678	-0.2608
1054.4	415.49	165.29	43.1135	11.7004	3.27552	-0.276615
1055.2	415.321	166.313	43.8928	11.9802	3.34551	-0.292045
1056	415.13	167.333	44.6771	12.2627	3.41676	-0.307056
1056.8	414.917	168.351	45.4668	12.5478	3.48927	-0.321651
1057.6	414.686	169.367	46.261	12.8354	3.56304	-0.3357
1058.4	414.44	170.382	47.0582	13.125	3.63815	-0.349022
1059.2	414.18	171.394	47.8583	13.4165	3.71457	-0.361562
1060	413.91	172.406	48.6609	13.7098	3.7923	-0.373231
1060.8	413.627	173.416	49.4659	14.0049	3.8714	-0.384041
1061.6	413.328	174.423	50.274	14.3021	3.95192	-0.394089
1062.5	413.012	175.426	51.0848	14.6016	4.03391	-0.403344
1063.3	412.679	176.424	51.8985	14.9033	4.11746	-0.411811
1064.1	412.328	177.417	52.7148	15.2074	4.20255	-0.419476
1064.9	411.961	178.407	53.5337	15.5137	4.28918	-0.426273
1065.7	411.576	179.391	54.3552	15.8222	4.3774	-0.432245
1066.5	411.171	180.369	55.1799	16.1333	4.46725	-0.43744
1067.3	410.749	181.342	56.0067	16.4467	4.55874	-0.441702
1068.2	410.315	182.309	56.8342	16.7618	4.65191	-0.444841
1069	409.871	183.271	57.6618	17.0785	4.74679	-0.446751
1069.8	409.422	184.228	58.4883	17.3964	4.84338	-0.447255
1070.6	408.967	185.18	59.3137	17.7156	4.94173	-0.446353
1071.4	408.502	186.125	60.1386	18.0364	5.04189	-0.444132
1072.2	408.03	187.063	60.9621	18.3586	5.14391	-0.44046
1073	407.553	187.994	61.7835	18.6819	5.24783	-0.435242
1073.8	407.07	188.919	62.6033	19.0065	5.35362	-0.428526
1074.6	406.58	189.838	63.4221	19.3324	5.46122	-0.420342
1075.4	406.082	190.751	64.2403	19.6598	5.57062	-0.410737
1076.2	405.574	191.66	65.059	19.9888	5.6818	-0.39982
1077.1	405.056	192.563	65.8777	20.3193	5.79475	-0.387513
1077.9	404.533	193.461	66.6955	20.651	5.90951	-0.373691
1078.7	404.002	194.355	67.5131	20.9841	6.02604	-0.358403
1079.5	403.464	195.246	68.3307	21.3185	6.14429	-0.341659
1080.3	402.919	196.132	69.1482	21.6542	6.26431	-0.323425
1081.1	402.365	197.014	69.9655	21.9914	6.38616	-0.303709
1081.9	401.803	197.89	70.7824	22.3299	6.50987	-0.282463
1082.7	401.235	198.76	71.5984	22.6697	6.6355	-0.259621
1083.5	400.658	199.625	72.414	23.011	6.76301	-0.235237
1084.3	400.071	200.486	73.2301	23.3539	6.89234	-0.209382
1085.1	399.474	201.342	74.0468	23.6983	7.02351	-0.182054
1085.9	398.865	202.193	74.8643	24.0443	7.15653	-0.153282
1086.7	398.248	203.04	75.6818	24.3918	7.29144	-0.122921
1087.5	397.628	203.881	76.4973	24.7402	7.42831	-0.090732
1088.3	397.007	204.717	77.3105	25.0894	7.56717	-0.0566241
1089.1	396.388	205.549	78.1203	25.4391	7.70803	-0.0204421
1089.9	395.772	206.375	78.9261	25.7891	7.85095	0.0178904
1090.8	395.159	207.195	79.728	26.1395	7.99595	0.0583717
1091.6	394.553	208.009	80.5248	26.49	8.14309	0.101187
1092.4	393.957	208.817	81.3151	26.8403	8.29244	0.146516
1093.3	393.369	209.619	82.0996	27.1904	8.44397	0.194297
1094.1	392.789	210.416	82.8792	27.5406	8.59762	0.244446
1094.9	392.214	211.208	83.654	27.8908	8.75339	0.29696
1095.8	391.644	211.995	84.4249	28.2413	8.91126	0.351746
1096.6	391.082	212.777	85.1909	28.5917	9.07126	0.408953
1097.4	390.532	213.554	85.9503	28.9417	9.23348	0.468829
1098.3	389.993	214.325	86.7032	29.2912	9.3979	0.531359
1099.1	389.468	215.092	87.4496	29.6402	9.56452	0.596583
1100	388.954	215.854	88.1897	29.9889	9.73339	0.664462
1100.8	388.445	216.609	88.9246	30.3377	9.90455	0.734833
1101.6	387.941	217.357	89.6542	30.6866	10.078	0.807703
1102.5	387.44	218.096	90.3786	31.036	10.2539	0.883049
1103.3	386.94	218.827	91.0985	31.3859	10.4322	0.960796
1104.1	386.44	219.549	91.8141	31.7364	10.6129	1.04092
1105	385.935	220.263	92.5263	32.0879	10.7961	1.12329
1105.8	385.422	220.966	93.236	32.4408	10.9817	1.20779
1106.6	384.902	221.66	93.9426	32.7949	11.1698	1.29453
1107.5	384.38	222.343	94.6447	33.1499	11.3604	1.38367
1108.3	383.856	223.015	95.3422	33.5056	11.5536	1.47526
1109.1	383.332	223.678	96.0344	33.862	11.7494	1.56941
1109.9	382.804	224.329	96.7219	34.2192	11.9479	1.66603
1110.8	382.267	224.968	97.4061	34.5779	12.149	1.76492
1111.6	381.722	225.594	98.0864	34.938	12.3529	1.86615
1112.4	381.167	226.206	98.7627	35.2995	12.5595	1.96973
1113.3	380.603	226.805	99.4353	35.6625	12.7689	2.07566
1114.1	380.033	227.392	100.104	36.0267	12.9811	2.18404
1114.9	379.454	227.966	100.768	36.3921	13.196	2.29485
1115.7	378.867	228.528	101.429	36.759	13.4136	2.40805
1116.6	378.272	229.077	102.086	37.1271	13.634	2.52371
1117.4	377.67	229.614	102.739	37.4964	13.8573	2.64191
1118.2	377.063	230.139	103.388	37.8667	14.0833	2.76268
1119.1	376.451	230.652	104.031	38.238	14.3121	2.8861
1119.9	375.833	231.151	104.671	38.6105	14.5438	3.01209
1120.8	375.201	231.637	105.307	38.9847	14.7784	3.14049
1121.6	374.556	232.109	105.94	39.3608	15.0159	3.27126
1122.4	373.892	232.564	106.571	39.7391	15.2564	3.40431
1123.3	373.21	233.003	107.2	40.1195	15.4999	3.53966
1124.1	372.513	233.428	107.825	40.5019	15.7464	3.67739
1125	371.797	233.836	108.449	40.8865	15.9959	3.81744
1125.8	371.06	234.229	109.071	41.2735	16.2485	3.95972
1126.7	370.307	234.605	109.69	41.6626	16.5042	4.10442
1127.5	369.541	234.965	110.305	42.0534	16.7629	4.25177
1128.3	368.766	235.31	110.915	42.4454	17.0248	4.40191
1129.2	367.989	235.639	111.518	42.8382	17.2899	4.5551
1130	367.209	235.953	112.115	43.2319	17.5582	4.71135
1130.9	366.423	236.25	112.705	43.6265	17.8297	4.87061
1131.7	365.637	236.531	113.287	44.0218	18.1046	5.03307
1132.6	364.853	236.796	113.86	44.4174	18.3827	5.19892
1133.4	364.072	237.045	114.425	44.8133	18.6642	5.36815
1134.3	363.293	237.277	114.981	45.2094	18.9491	5.54079
1135.1	362.516	237.493	115.528	45.6059	19.2373	5.71685
1135.9	361.74	237.692	116.066	46.0029	19.5289	5.89628
1136.8	360.97	237.875	116.596	46.3999	19.8239	6.0793
1137.6	360.211	238.043	117.113	46.7963	20.1223	6.26618
1138.5	359.465	238.194	117.619	47.1921	20.4243	6.45699
1139.3	358.735	238.329	118.113	47.587	20.7297	6.65186
1140.1	358.018	238.448	118.594	47.9813	21.0387	6.8507
1141	357.306	238.549	119.066	48.3755	21.3512	7.05328
1141.8	356.598	238.632	119.527	48.7699	21.6674	7.25958
1142.6	355.892	238.695	119.978	49.1647	21.9872	7.46955
1143.5	355.185	238.739	120.42	49.56	22.3107	7.68314
1144.3	354.48	238.764	120.852	49.9556	22.6378	7.90044
1145.1	353.771	238.768	121.275	50.3521	22.9688	8.12129
1145.9	353.053	238.751	121.69	50.7498	23.3035	8.34554
1146.8	352.332	238.713	122.096	51.1483	23.642	8.57341
1147.6	351.614	238.654	122.492	51.547	23.9843	8.80518
1148.5	350.902	238.575	122.875	51.9457	24.3305	9.04096
1149.3	350.201	238.476	123.246	52.3438	24.6806	9.28102
1150.1	349.508	238.356	123.604	52.7416	25.0346	9.52528
1151	348.817	238.214	123.95	53.1398	25.3926	9.77349
1151.8	348.13	238.049	124.285	53.538	25.7547	10.0258
1152.7	347.449	237.863	124.608	53.9362	26.1207	10.2823
1153.5	346.772	237.656	124.918	54.3343	26.4906	10.5427
1154.4	346.101	237.43	125.219	54.7323	26.8638	10.8067
1155.3	345.431	237.185	125.509	55.1302	27.2402	11.074
1156.1	344.76	236.925	125.792	55.5283	27.6195	11.3441
1157	344.09	236.648	126.066	55.9263	28.0014	11.617
1157.8	343.425	236.356	126.332	56.3239	28.386	11.8928
1158.7	342.762	236.051	126.589	56.721	28.7729	12.1711
1159.5	342.104	235.734	126.839	57.1174	29.1617	12.4517
1160.4	341.449	235.406	127.083	57.5133	29.5525	12.7344
1161.2	340.791	235.064	127.32	57.9092	29.9453	13.0192
1162.1	340.132	234.71	127.551	58.3049	30.34	13.306
1163	339.469	234.343	127.776	58.7005	30.7367	13.5947
1163.8	338.801	233.964	127.997	59.0962	31.1349	13.8851
1164.7	338.128	233.577	128.215	59.4916	31.5342	14.1765
1165.5	337.448	233.181	128.43	59.8871	31.9345	14.4689
1166.3	336.758	232.777	128.644	60.2826	32.3355	14.7618
1167.2	336.061	232.367	128.855	60.6781	32.7372	15.0555
1168	335.361	231.947	129.063	61.0731	33.1399	15.3503
1168.8	334.66	231.519	129.266	61.4675	33.5436	15.6462
1169.6	333.961	231.084	129.464	61.8609	33.9482	15.9434
1170.5	333.264	230.64	129.657	62.2533	34.3536	16.2418
1171.3	332.567	230.189	129.845	62.645	34.7599	16.5412
1172.1	331.871	229.73	130.029	63.0356	35.167	16.8418
1172.9	331.181	229.262	130.206	63.4251	35.5752	17.1439
1173.8	330.493	228.787	130.378	63.8134	35.9839	17.4469
1174.6	329.807	228.308	130.547	64.2004	36.3927	17.7503
1175.5	329.12	227.826	130.714	64.5863	36.8012	18.0538
1176.3	328.429	227.344	130.88	64.9712	37.2091	18.3568
1177.2	327.737	226.861	131.046	65.3548	37.6161	18.6595
1178	327.047	226.377	131.209	65.7368	38.0227	18.9621
1178.9	326.359	225.892	131.371	66.1172	38.4284	19.2643
1179.7	325.673	225.41	131.532	66.4959	38.833	19.5659
1180.5	324.989	224.928	131.692	66.873	39.2366	19.867
1181.4	324.301	224.444	131.85	67.2488	39.6395	20.1677
1182.2	323.613	223.959	132.007	67.6233	40.0417	20.468
1183	322.922	223.468	132.162	67.9967	40.4437	20.7684
1183.9	322.227	222.975	132.315	68.3689	40.8453	21.0686
1184.7	321.528	222.479	132.467	68.74	41.2461	21.3683
1185.5	320.823	221.979	132.619	69.1102	41.6463	21.6676
1186.4	320.109	221.475	132.77	69.4797	42.0461	21.9664
1187.2	319.387	220.967	132.92	69.8483	42.4452	22.2648
1188	318.661	220.455	133.069	70.2158	42.8438	22.5628
1188.9	317.931	219.94	133.216	70.582	43.2418	22.8604
1189.7	317.198	219.422	133.363	70.9469	43.6388	23.1575
1190.6	316.46	218.901	133.507	71.3105	44.0352	23.4541
1191.4	315.716	218.373	133.65	71.6732	44.4312	23.7505
1192.3	314.966	217.84	133.791	72.0348	44.8268	24.0466
1193.1	314.21	217.299	133.929	72.3954	45.2222	24.3427
1193.9	313.447	216.754	134.066	72.7549	45.6169	24.6383
1194.8	312.677	216.207	134.203	73.1131	46.0103	24.9327
1195.6	311.899	215.661	134.342	73.4701	46.402	25.2257
1196.5	311.111	215.116	134.483	73.8258	46.7917	25.5168
1197.4	310.313	214.574	134.627	74.1802	47.1792	25.8058
1198.2	309.507	214.034	134.774	74.533	47.5643	26.0928
1199.1	308.691	213.5	134.925	74.8843	47.9468	26.3773
1199.9	307.865	212.974	135.081	75.2339	48.3259	26.6587
1200.8	307.029	212.455	135.242	75.5818	48.7019	26.9373
1201.7	306.181	211.94	135.407	75.9283	49.0752	27.2133
1202.5	305.32	211.428	135.577	76.2735	49.4457	27.4867
1203.4	304.447	210.919	135.75	76.6174	49.8139	27.7578
1204.2	303.559	210.413	135.927	76.9601	50.1793	28.0262
1205	302.657	209.915	136.111	77.3012	50.5411	28.2912
1205.9	301.739	209.424	136.301	77.641	50.8995	28.5528
1206.7	300.805	208.939	136.498	77.9795	51.2544	28.8109
1207.5	299.857	208.461	136.701	78.3163	51.6058	29.0658
1208.4	298.899	207.987	136.908	78.6515	51.9543	29.318
1209.2	297.934	207.518	137.117	78.9846	52.2999	29.5676
1210.1	296.963	207.053	137.329	79.3154	52.6425	29.8147
1210.9	295.99	206.591	137.542	79.6439	52.9825	30.0596
1211.8	295.011	206.132	137.756	79.9702	53.32	30.3025
1212.6	294.032	205.672	137.968	80.294	53.6553	30.5438
1213.4	293.056	205.212	138.179	80.6152	53.9888	30.7839
1214.3	292.082	204.751	138.387	80.9337	54.3202	31.0225
1215.1	291.108	204.293	138.595	81.2493	54.649	31.2592
1215.9	290.136	203.838	138.803	81.5621	54.9752	31.494
1216.8	289.163	203.386	139.011	81.8721	55.2983	31.7263
1217.6	288.194	202.938	139.219	82.179	55.6188	31.9568
1218.5	287.233	202.49	139.422	82.4825	55.937	32.1859
1219.3	286.281	202.044	139.623	82.7824	56.253	32.4137
1220.1	285.339	201.598	139.819	83.0787	56.5666	32.6401
1221	284.407	201.154	140.012	83.3714	56.8778	32.8652
1221.8	283.481	200.712	140.203	83.6606	57.1865	33.0886
1222.6	282.562	200.27	140.39	83.9464	57.4928	33.3104
1223.5	281.65	199.827	140.574	84.2289	57.7968	33.5308
1224.3	280.742	199.385	140.755	84.508	58.0983	33.7496
1225.1	279.842	198.945	140.934	84.7835	58.3971	33.9665
1225.9	278.945	198.505	141.111	85.0557	58.6932	34.1816
1226.8	278.051	198.068	141.286	85.3245	58.9864	34.3945
1227.6	277.163	197.631	141.459	85.5899	59.2769	34.6056
1228.4	276.285	197.193	141.626	85.8513	59.5652	34.8155
1229.2	275.421	196.753	141.787	86.1088	59.8513	35.0244
1230	274.573	196.31	141.941	86.3618	60.1357	35.2327
1230.8	273.742	195.865	142.087	86.6105	60.4182	35.4403
1231.7	272.925	195.416	142.227	86.8552	60.6986	35.647
1232.5	272.123	194.964	142.359	87.0955	60.9772	35.8531
1233.3	271.339	194.507	142.482	87.3314	61.2543	36.0589
1234.1	270.571	194.047	142.598	87.5629	61.5292	36.2638
1235	269.817	193.588	142.709	87.7899	61.8014	36.4671
1235.8	269.075	193.131	142.815	88.0125	62.0705	36.6685
1236.6	268.341	192.678	142.92	88.2307	62.3358	36.8671
1237.4	267.616	192.231	143.023	88.4446	62.5972	37.063
1238.3	266.903	191.788	143.123	88.6537	62.8549	37.2565
1239.1	266.2	191.352	143.221	88.8583	63.1084	37.4468
1239.9	265.506	190.925	143.32	89.058	63.3571	37.6336
1240.6	264.82	190.506	143.419	89.2531	63.6012	37.8169
1241.4	264.142	190.097	143.517	89.4435	63.8405	37.9965
1242.2	263.472	189.695	143.616	89.6292	64.0751	38.1726
1243	262.811	189.301	143.714	89.8101	64.305	38.3452
1243.8	262.156	188.917	143.813	89.9862	64.5299	38.5139
1244.6	261.504	188.546	143.915	90.1576	64.7488	38.6777
1245.4	260.855	188.19	144.022	90.3243	64.9616	38.8364
1246.3	260.207	187.849	144.133	90.4863	65.168	38.9898
1247.1	259.563	187.522	144.249	90.6433	65.3682	39.1381
1247.9	258.927	187.206	144.365	90.7951	65.5629	39.2822
1248.8	258.303	186.901	144.481	90.9416	65.7522	39.4221
1249.6	257.692	186.606	144.596	91.0825	65.9362	39.5583
1250.5	257.097	186.32	144.71	91.2177	66.1151	39.6907
1251.3	256.515	186.044	144.822	91.3472	66.2887	39.8193
1252.1	255.951	185.775	144.93	91.4709	66.4575	39.9446
1253	255.408	185.512	145.034	91.5884	66.6218	40.0672
1253.8	254.884	185.257	145.133	91.6999	66.7811	40.1864
1254.7	254.376	185.014	145.232	91.8053	66.9347	40.3013
1255.5	253.881	184.784	145.331	91.9047	67.0821	40.4116
1256.3	253.397	184.57	145.433	91.9982	67.2228	40.5166
1257.1	252.927	184.37	145.535	92.0854	67.3569	40.6166
1257.9	252.475	184.182	145.636	92.1663	67.4851	40.7123
1258.7	252.041	184.008	145.735	92.2406	67.6071	40.8035
1259.5	251.624	183.848	145.835	92.3084	67.7225	40.8898
1260.3	251.224	183.7	145.934	92.37	67.8319	40.9717
1261.1	250.836	183.565	146.032	92.4261	67.9356	41.0494
1261.8	250.462	183.439	146.13	92.4768	68.0341	41.1232
1262.6	250.101	183.319	146.226	92.5226	68.1282	41.1939
1263.4	249.751	183.207	146.32	92.5638	68.2178	41.2613
1264.2	249.41	183.104	146.414	92.6004	68.3026	41.325
1265	249.076	183.009	146.508	92.633	68.3829	41.3853
1265.8	248.746	182.92	146.603	92.6622	68.4593	41.4425
1266.6	248.421	182.837	146.698	92.6877	68.5317	41.4966
1267.4	248.106	182.759	146.79	92.7095	68.6005	41.5482
1268.2	247.8	182.684	146.881	92.7275	68.6659	41.5974
1269	247.505	182.613	146.968	92.7416	68.7279	41.6442
1269.9	247.219	182.543	147.053	92.7523	68.787	41.6891
1270.7	246.939	182.474	147.135	92.7605	68.8439	41.7325
1271.5	246.665	182.403	147.213	92.7662	68.8989	41.7747
1272.2	246.398	182.328	147.287	92.7696	68.9525	41.8163
1273	246.137	182.251	147.357	92.7708	69.0044	41.8567
1273.8	245.882	182.176	147.425	92.7693	69.0537	41.8954
1274.6	245.63	182.102	147.492	92.7654	69.1004	41.9321
1275.3	245.38	182.032	147.559	92.759	69.144	41.9664
1276.1	245.134	181.966	147.625	92.7501	69.1847	41.9983
1276.8	244.89	181.901	147.691	92.7389	69.2226	42.0283
1277.6	244.651	181.84	147.756	92.7251	69.2575	42.0558
1278.4	244.414	181.785	147.822	92.7085	69.2888	42.0805
1279.2	244.179	181.734	147.887	92.6898	69.3172	42.1029
1279.9	243.943	181.683	147.953	92.6697	69.3435	42.1236
1280.7	243.704	181.631	148.018	92.6486	69.3682	42.143
1281.5	243.463	181.575	148.082	92.6271	69.3921	42.1618
1282.3	243.217	181.517	148.145	92.6053	69.4151	42.1798
1283.1	242.967	181.458	148.209	92.5829	69.4362	42.1961
1284	242.71	181.398	148.273	92.5603	69.4561	42.2113
1284.8	242.445	181.336	148.339	92.5379	69.475	42.2255
1285.6	242.174	181.272	148.404	92.5154	69.4927	42.2385
1286.4	241.902	181.205	148.468	92.4923	69.5094	42.2508
1287.2	241.629	181.137	148.531	92.4684	69.5247	42.262
1288	241.358	181.068	148.592	92.443	69.5382	42.2719
1288.8	241.091	180.997	148.651	92.4163	69.5503	42.2809
1289.6	240.824	180.922	148.707	92.3888	69.5615	42.2892
1290.4	240.562	180.844	148.76	92.3601	69.5717	42.297
1291.2	240.306	180.762	148.808	92.3299	69.5809	42.3044
1292	240.057	180.677	148.853	92.2983	69.5891	42.3113
1292.8	239.811	180.589	148.894	92.2654	69.5959	42.3174
1293.6	239.57	180.499	148.933	92.2313	69.6015	42.3227
1294.4	239.331	180.407	148.969	92.1962	69.6059	42.3271
1295.2	239.097	180.313	149.002	92.1598	69.6089	42.3307
1296	238.871	180.217	149.031	92.1214	69.6104	42.3335
1296.8	238.656	180.119	149.057	92.081	69.6103	42.3354
1297.6	238.45	180.021	149.077	92.0384	69.6083	42.3362
1298.5	238.253	179.92	149.094	91.9941	69.605	42.3364
1299.3	238.06	179.814	149.107	91.9493	69.6014	42.3365
1300.1	237.87	179.702	149.115	91.9042	69.5976	42.3368
1300.9	237.682	179.581	149.119	91.8593	69.5945	42.3379
1301.7	237.494	179.452	149.119	91.8151	69.5922	42.3398
1302.5	237.307	179.314	149.114	91.7713	69.5904	42.3424
1303.3	237.117	179.167	149.106	91.7289	69.5899	42.3462
1304	236.921	179.007	149.093	91.6886	69.5912	42.3515
1304.8	236.722	178.836	149.077	91.6498	69.5942	42.3582
1305.5	236.524	178.654	149.055	91.6121	69.5986	42.3664
1306.3	236.328	178.462	149.027	91.5753	69.6044	42.376
1307	236.138	178.259	148.994	91.5388	69.6111	42.3867
1307.7	235.95	178.045	148.954	91.5031	69.6194	42.3991
1308.5	235.761	177.817	148.908	91.4693	69.63	42.4136
1309.2	235.572	177.575	148.855	91.4373	69.643	42.4304
1309.9	235.385	177.318	148.796	91.4071	69.6586	42.4496
1310.7	235.198	177.048	148.731	91.3784	69.6762	42.4708
1311.4	235.013	176.769	148.66	91.3507	69.6949	42.4931
1312.1	234.828	176.481	148.586	91.3239	69.7144	42.5162
1312.9	234.642	176.186	148.509	91.2981	69.7343	42.5397
1313.6	234.456	175.886	148.429	91.2727	69.7542	42.5633
1314.4	234.274	175.581	148.345	91.2475	69.7739	42.5869
1315.1	234.094	175.274	148.26	91.2221	69.7926	42.6098
1315.9	233.918	174.967	148.173	91.1958	69.8095	42.6313
1316.7	233.744	174.66	148.085	91.169	69.8249	42.6517
1317.4	233.571	174.351	147.996	91.1424	69.8396	42.6714
1318.2	233.397	174.039	147.906	91.1162	69.8535	42.6905
1318.9	233.223	173.723	147.813	91.0906	69.8671	42.7094
1319.6	233.048	173.405	147.721	91.0654	69.8797	42.7274
1320.4	232.872	173.091	147.629	91.0398	69.89	42.7433
1321.1	232.695	172.779	147.538	91.0139	69.8983	42.7574
1321.8	232.517	172.47	147.45	90.9878	69.9042	42.7694
1322.5	232.337	172.165	147.363	90.9614	69.9078	42.7793
1323.2	232.158	171.861	147.276	90.9349	69.9097	42.7876
1323.9	231.98	171.559	147.189	90.908	69.9096	42.7943
1324.7	231.806	171.259	147.102	90.8803	69.9073	42.7993
1325.4	231.636	170.961	147.015	90.8522	69.9032	42.8027
1326.1	231.467	170.664	146.927	90.8239	69.8974	42.8047
1326.8	231.301	170.368	146.839	90.7954	69.8899	42.8053
1327.5	231.139	170.07	146.749	90.7668	69.8813	42.8051
1328.3	230.981	169.775	146.658	90.7377	69.8709	42.8034
1329	230.827	169.485	146.568	90.7076	69.8574	42.7992
1329.8	230.676	169.202	146.48	90.6762	69.8407	42.7921
1330.5	230.529	168.928	146.396	90.6433	69.8197	42.7814
1331.3	230.386	168.665	146.314	90.6088	69.7947	42.7672
1332.1	230.248	168.409	146.233	90.5727	69.7662	42.75
1332.8	230.117	168.163	146.155	90.5348	69.7334	42.7293
1333.6	229.992	167.928	146.08	90.4947	69.6959	42.7046
1334.4	229.872	167.703	146.007	90.453	69.6544	42.6765
1335.1	229.754	167.485	145.937	90.4106	69.6099	42.6458
1335.9	229.639	167.27	145.867	90.368	69.563	42.6129
1336.6	229.523	167.057	145.798	90.3261	69.5148	42.5788
1337.3	229.407	166.844	145.73	90.285	69.4653	42.5434
1338.1	229.291	166.635	145.663	90.2443	69.4137	42.5062
1338.8	229.172	166.426	145.598	90.2049	69.3612	42.4678
1339.6	229.048	166.216	145.533	90.1673	69.3081	42.4287
1340.3	228.921	166.004	145.47	90.1315	69.2545	42.389
1341.1	228.791	165.791	145.406	90.0974	69.2005	42.3486
1341.8	228.659	165.576	145.343	90.0649	69.146	42.3076
1342.5	228.526	165.362	145.28	90.0337	69.0906	42.2657
1343.3	228.391	165.144	145.218	90.0047	69.0352	42.2235
1344.1	228.249	164.92	145.154	89.9788	68.981	42.1821
1344.8	228.102	164.688	145.089	89.9563	68.9283	42.1416
1345.5	227.949	164.446	145.023	89.9374	68.8775	42.1025
1346.3	227.791	164.198	144.956	89.9219	68.828	42.0642
1347	227.628	163.948	144.889	89.9088	68.7784	42.0254
1347.8	227.46	163.697	144.824	89.8979	68.7284	41.986
1348.5	227.289	163.448	144.762	89.8889	68.6774	41.9454
1349.2	227.113	163.2	144.701	89.8817	68.6251	41.9033
1350	226.934	162.954	144.643	89.8764	68.5717	41.8599
1350.7	226.752	162.713	144.589	89.8723	68.5164	41.8145
1351.4	226.569	162.479	144.538	89.8689	68.4581	41.7663
1352.1	226.382	162.251	144.491	89.8667	68.3978	41.7158
1352.8	226.19	162.024	144.447	89.867	68.3366	41.6643
1353.5	225.992	161.797	144.405	89.87	68.275	41.6119
1354.2	225.786	161.566	144.365	89.8767	68.2142	41.5597
1354.8	225.572	161.334	144.327	89.8868	68.1536	41.5071
1355.5	225.352	161.104	144.292	89.8992	68.0916	41.4528
1356.2	225.125	160.877	144.262	89.9144	68.0288	41.3974
1356.9	224.889	160.65	144.234	89.9327	67.9656	41.341
1357.6	224.647	160.424	144.21	89.9537	67.9017	41.2835
1358.2	224.4	160.198	144.188	89.9771	67.8374	41.2252
1358.9	224.148	159.974	144.168	90.0024	67.7723	41.166
1359.6	223.895	159.752	144.15	90.0287	67.7058	41.1053
1360.3	223.64	159.532	144.133	90.0563	67.6384	41.0437
1361	223.382	159.311	144.117	90.0857	67.5708	40.9817
1361.7	223.121	159.088	144.102	90.1164	67.503	40.9193
1362.4	222.86	158.864	144.085	90.1483	67.4353	40.8569
1363.1	222.599	158.638	144.069	90.1811	67.3672	40.7942
1363.8	222.338	158.415	144.053	90.2142	67.2979	40.7304
1364.5	222.076	158.194	144.038	90.2477	67.2274	40.6655
1365.2	221.815	157.976	144.024	90.2814	67.1555	40.5993
1365.9	221.556	157.761	144.012	90.3149	67.0819	40.5316
1366.6	221.3	157.549	143.999	90.3475	67.0069	40.4629
1367.3	221.048	157.341	143.986	90.3789	66.93	40.3929
1368	220.802	157.138	143.973	90.4086	66.8509	40.3211
1368.6	220.561	156.939	143.959	90.4371	66.7701	40.248
1369.3	220.322	156.741	143.946	90.4652	66.6883	40.1742
1370	220.084	156.544	143.932	90.4931	66.6056	40.0998
1370.6	219.847	156.345	143.917	90.5213	66.523	40.0254
1371.3	219.611	156.145	143.9	90.5498	66.4401	39.951
1372	219.376	155.946	143.884	90.5781	66.3567	39.8761
1372.6	219.141	155.745	143.866	90.6069	66.2731	39.8012
1373.3	218.905	155.542	143.848	90.6366	66.1897	39.7265
1374	218.669	155.338	143.829	90.6665	66.1064	39.6519
1374.6	218.436	155.132	143.807	90.6961	66.0231	39.5775
1375.3	218.207	154.925	143.784	90.7247	65.9395	39.5032
1376	217.983	154.717	143.758	90.7517	65.8553	39.4288
1376.7	217.765	154.508	143.728	90.7773	65.7709	39.3546
1377.4	217.549	154.295	143.696	90.8025	65.6869	39.2811
1378.1	217.338	154.079	143.66	90.8267	65.6033	39.2083
1378.8	217.131	153.859	143.62	90.8498	65.5202	39.1364
1379.5	216.929	153.636	143.577	90.8718	65.4374	39.0651
1380.2	216.731	153.413	143.532	90.8924	65.3541	38.9939
1380.9	216.537	153.191	143.485	90.9119	65.2704	38.9225
1381.6	216.346	152.969	143.437	90.9306	65.1859	38.8507
1382.3	216.158	152.749	143.389	90.9481	65.1005	38.7783
1383	215.974	152.532	143.339	90.9639	65.0141	38.7054
1383.7	215.796	152.318	143.289	90.9781	64.9262	38.6316
1384.4	215.621	152.111	143.239	90.9903	64.8363	38.5563
1385.1	215.452	151.907	143.189	91.0007	64.7448	38.4799
1385.8	215.285	151.707	143.14	91.0098	64.6521	38.4026
1386.5	215.122	151.511	143.09	91.0175	64.5583	38.3247
1387.2	214.962	151.316	143.039	91.0239	64.4637	38.2463
1387.9	214.804	151.125	142.988	91.0291	64.3679	38.1672
1388.6	214.65	150.939	142.938	91.0329	64.2704	38.0867
1389.3	214.497	150.76	142.89	91.0354	64.1712	38.0049
1390	214.346	150.586	142.843	91.0369	64.0703	37.9218
1390.7	214.197	150.418	142.798	91.0368	63.9677	37.8373
1391.4	214.053	150.255	142.752	91.0347	63.8636	37.7519
1392.1	213.915	150.096	142.706	91.03	63.7578	37.6655
1392.8	213.783	149.944	142.659	91.0223	63.6502	37.578
1393.5	213.659	149.796	142.611	91.0115	63.541	37.4896
1394.2	213.542	149.652	142.562	90.9977	63.4303	37.4004
1395	213.433	149.513	142.51	90.9805	63.3181	37.3106
1395.7	213.333	149.376	142.456	90.9594	63.2047	37.2204
1396.4	213.242	149.244	142.399	90.9345	63.0897	37.1297
1397	213.16	149.118	142.341	90.9059	62.9727	37.0377
1397.7	213.086	148.998	142.283	90.8736	62.8536	36.9445
1398.4	213.018	148.887	142.225	90.8377	62.7321	36.8497
1399	212.959	148.784	142.167	90.798	62.6081	36.7534
1399.7	212.91	148.688	142.107	90.7537	62.4819	36.6559
1400.3	212.871	148.6	142.045	90.7047	62.3532	36.5569
1401	212.843	148.521	141.984	90.651	62.2219	36.4564
1401.6	212.823	148.448	141.921	90.5929	62.0882	36.3545
1402.2	212.811	148.383	141.857	90.5314	61.9529	36.2518
1402.9	212.806	148.322	141.792	90.4669	61.8162	36.1484
1403.5	212.806	148.264	141.726	90.3999	61.6788	36.0449
1404.1	212.81	148.209	141.659	90.3306	61.5407	35.9412
1404.8	212.819	148.159	141.592	90.2592	61.4016	35.8371
1405.4	212.831	148.112	141.524	90.1864	61.2622	35.7329
1406	212.842	148.067	141.457	90.1131	61.1227	35.6289
1406.7	212.856	148.024	141.389	90.0389	60.9833	35.5251
1407.3	212.872	147.983	141.32	89.9633	60.8439	35.4218
1408	212.891	147.943	141.251	89.8862	60.7046	35.3188
1408.6	212.913	147.905	141.179	89.8074	60.5651	35.2162
1409.3	212.938	147.868	141.107	89.7275	60.4262	35.1142
1409.9	212.963	147.829	141.034	89.6476	60.2883	35.0135
1410.6	212.988	147.789	140.959	89.5678	60.1518	34.9141
1411.3	213.012	147.746	140.882	89.4882	60.0168	34.8163
1411.9	213.035	147.701	140.805	89.4089	59.8833	34.7198
1412.6	213.059	147.657	140.726	89.3291	59.7506	34.6243
1413.2	213.082	147.612	140.648	89.2491	59.6187	34.5297
1413.9	213.105	147.569	140.569	89.169	59.4875	34.4358
1414.5	213.128	147.528	140.49	89.0885	59.3568	34.3425
1415.1	213.15	147.487	140.412	89.0077	59.2268	34.2501
1415.8	213.173	147.449	140.333	88.9262	59.0973	34.1582
1416.5	213.197	147.414	140.254	88.8436	58.9678	34.0667
1417.3	213.22	147.381	140.176	88.7607	58.839	33.9758
1418.1	213.24	147.347	140.099	88.6785	58.7114	33.8861
1418.8	213.257	147.313	140.021	88.5975	58.5855	33.7978
1419.6	213.269	147.276	139.944	88.5183	58.4619	33.7114
1420.4	213.275	147.237	139.868	88.4411	58.3405	33.6267
1421.2	213.276	147.197	139.792	88.3651	58.2206	33.5434
1421.9	213.272	147.157	139.717	88.2911	58.1027	33.4616
1422.7	213.261	147.114	139.644	88.2194	57.9871	33.3816
1423.5	213.244	147.07	139.571	88.1495	57.8735	33.3032
1424.3	213.224	147.026	139.499	88.0806	57.7618	33.2265
1425.1	213.201	146.98	139.427	88.0121	57.6518	33.1513
1425.8	213.178	146.936	139.354	87.9431	57.543	33.0775
1426.6	213.154	146.891	139.28	87.8736	57.4356	33.0051
1427.4	213.128	146.845	139.206	87.8043	57.33	32.9345
1428.1	213.103	146.799	139.131	87.7344	57.2261	32.8656
1428.9	213.078	146.752	139.054	87.6634	57.1238	32.7985
1429.7	213.054	146.705	138.975	87.5914	57.023	32.7331
1430.4	213.031	146.658	138.895	87.5182	56.9235	32.6692
1431.2	213.009	146.612	138.815	87.444	56.8254	32.6069
1432	212.986	146.567	138.734	87.369	56.7288	32.5461
1432.8	212.965	146.523	138.651	87.2925	56.6333	32.4868
1433.6	212.948	146.48	138.567	87.2134	56.5388	32.4288
1434.5	212.934	146.44	138.481	87.1316	56.445	32.3722
1435.3	212.926	146.403	138.393	87.0466	56.3519	32.3168
1436.1	212.922	146.367	138.303	86.9591	56.2597	32.2628
1436.9	212.918	146.331	138.212	86.8703	56.1693	32.2107
1437.8	212.914	146.295	138.119	86.7806	56.0808	32.1607
1438.6	212.909	146.257	138.025	86.6906	55.9948	32.1131
1439.5	212.901	146.217	137.93	86.6004	55.9113	32.068
1440.3	212.892	146.176	137.833	86.51	55.8302	32.0253
1441.3	212.88	146.132	137.736	86.4202	55.7521	31.9852
1442.4	212.861	146.084	137.638	86.3319	55.6773	31.9482
1443.4	212.839	146.034	137.54	86.2444	55.6057	31.914
1444.5	212.815	145.981	137.44	86.1565	55.5368	31.8825
1445.8	212.79	145.926	137.338	86.0679	55.4706	31.8537
1447.3	212.766	145.871	137.234	85.9776	55.4065	31.8274
1448.7	212.742	145.814	137.128	85.8863	55.3451	31.8038
1450.2	212.716	145.753	137.02	85.7952	55.2871	31.7834
1451.6	212.687	145.689	136.91	85.7039	55.2323	31.7661
1453.1	212.656	145.622	136.798	85.6121	55.1807	31.752
1454.7	212.624	145.553	136.685	85.5202	55.1321	31.7408
1456.4	212.591	145.481	136.569	85.4277	55.086	31.7321
1458	212.556	145.408	136.453	85.3349	55.0422	31.7257
1459.7	212.52	145.334	136.336	85.2424	55.0006	31.7213
1461.5	212.482	145.259	136.219	85.1496	54.9609	31.7188
1463.3	212.445	145.184	136.1	85.0562	54.9228	31.7179
1465.2	212.408	145.11	135.981	84.9619	54.886	31.7184
1467	212.374	145.037	135.862	84.8665	54.8499	31.7198
1468.8	212.34	144.966	135.742	84.7705	54.8147	31.7222
1470.6	212.305	144.895	135.621	84.6745	54.781	31.7259
1472.4	212.269	144.823	135.501	84.5787	54.7488	31.731
1474.2	212.232	144.75	135.381	84.4833	54.7183	31.7376
1476	212.193	144.678	135.261	84.3885	54.6891	31.7455
1477.8	212.153	144.607	135.141	84.294	54.6606	31.7538
1479.7	212.112	144.536	135.023	84.2001	54.6329	31.7627
1481.6	212.07	144.467	134.905	84.1073	54.6059	31.7721
1483.5	212.026	144.398	134.789	84.015	54.5795	31.7819
1485.2	211.983	144.331	134.672	83.9229	54.5538	31.7924
1486.9	211.94	144.265	134.556	83.8306	54.5287	31.8034
1488.6	211.899	144.201	134.44	83.7375	54.504	31.8148
1490.3	211.859	144.138	134.324	83.6439	54.4797	31.8267
1492	211.821	144.077	134.208	83.55	54.4559	31.8392
1493.8	211.784	144.017	134.092	83.4556	54.4327	31.8522
1495.6	211.75	143.958	133.975	83.3603	54.4102	31.866
1497.5	211.717	143.901	133.859	83.2643	54.388	31.8802
1499.4	211.687	143.846	133.742	83.1677	54.3655	31.8942
1501.3	211.66	143.794	133.626	83.0705	54.3425	31.9078
1503.1	211.635	143.746	133.512	82.9731	54.3187	31.9206
1504.9	211.613	143.702	133.398	82.8751	54.2939	31.9325
1506.7	211.596	143.661	133.285	82.7761	54.2684	31.9437
1508.5	211.582	143.625	133.172	82.676	54.2416	31.954
1510.3	211.574	143.593	133.06	82.5748	54.2134	31.963
1512.1	211.57	143.565	132.949	82.4727	54.1841	31.971
1513.8	211.567	143.54	132.839	82.3704	54.1542	31.9785
1515.5	211.567	143.517	132.729	82.2681	54.1241	31.9857
1517.2	211.568	143.495	132.621	82.166	54.0943	31.9931
1518.9	211.568	143.474	132.512	82.0644	54.0648	32.0006
1520.5	211.57	143.455	132.405	81.9633	54.0352	32.0079
1522.2	211.571	143.437	132.299	81.8631	54.0061	32.0153
1523.8	211.57	143.419	132.194	81.7644	53.9778	32.0232
1525.4	211.568	143.401	132.09	81.667	53.9502	32.0314
1527.1	211.565	143.383	131.987	81.5704	53.9232	32.0399
1529	211.562	143.366	131.885	81.4746	53.8966	32.0487
1530.9	211.56	143.35	131.783	81.3794	53.8703	32.0574
1532.7	211.557	143.334	131.683	81.2851	53.8446	32.0666
1534.6	211.552	143.316	131.583	81.1924	53.8203	32.0766
1536.4	211.544	143.297	131.483	81.1012	53.7973	32.0876
1538.2	211.534	143.277	131.384	81.0117	53.776	32.0997
1539.9	211.522	143.255	131.286	80.9237	53.7559	32.1126
1541.7	211.51	143.234	131.189	80.8371	53.7362	32.1256
1543.5	211.496	143.213	131.093	80.752	53.7167	32.1384
1545.3	211.481	143.192	130.999	80.6686	53.6971	32.1507
1547.2	211.467	143.174	130.907	80.5866	53.6773	32.1623
1549.1	211.452	143.156	130.817	80.5059	53.6571	32.1732
1550.9	211.438	143.14	130.728	80.4266	53.6361	32.183
1552.8	211.426	143.128	130.642	80.3483	53.6136	32.1911
1554.6	211.415	143.118	130.558	80.2715	53.5901	32.1978
1556.4	211.402	143.108	130.476	80.1966	53.5664	32.2038
1558.3	211.389	143.099	130.395	80.1239	53.5425	32.2091
1560.1	211.373	143.09	130.317	80.0536	53.519	32.2142
1561.9	211.355	143.08	130.241	79.9858	53.4956	32.2188
1563.7	211.336	143.072	130.167	79.9202	53.4713	32.222
1565.5	211.316	143.065	130.096	79.8571	53.4466	32.2242
1567.3	211.294	143.058	130.027	79.7967	53.4214	32.2254
1569	211.271	143.052	129.961	79.7387	53.3958	32.2255
1570.7	211.247	143.047	129.897	79.6827	53.3702	32.225
1572.5	211.222	143.042	129.835	79.6284	53.3443	32.2239
1574.3	211.198	143.039	129.774	79.5754	53.318	32.222
1576.2	211.173	143.036	129.714	79.5236	53.2917	32.2197
1578.1	211.148	143.033	129.656	79.4733	53.2656	32.2172
1580	211.123	143.03	129.6	79.4242	53.2401	32.2148
1582	211.097	143.027	129.543	79.376	53.2153	32.2129
1583.8	211.071	143.024	129.488	79.3287	53.191	32.2111
1585.6	211.045	143.022	129.433	79.2822	53.1668	32.209
1587.3	211.02	143.021	129.38	79.2366	53.1426	32.2066
1589.1	210.996	143.02	129.329	79.1919	53.1182	32.2037
1590.8	210.973	143.021	129.278	79.1479	53.0937	32.2004
1592.5	210.951	143.023	129.228	79.104	53.0695	32.1972
1594.2	210.931	143.026	129.178	79.06	53.0454	32.1939
1595.9	210.913	143.03	129.129	79.0157	53.0212	32.1904
1597.7	210.897	143.035	129.081	78.9714	52.9972	32.1869
1599.5	210.882	143.041	129.033	78.9276	52.9736	32.1835
1601.3	210.866	143.047	128.986	78.8844	52.9505	32.1803
1603.1	210.851	143.052	128.939	78.8421	52.9283	32.1776
1604.8	210.835	143.057	128.893	78.8007	52.9068	32.1752
1606.5	210.82	143.062	128.848	78.7601	52.886	32.1731
1608.2	210.803	143.066	128.804	78.7206	52.8658	32.1712
1610	210.786	143.069	128.761	78.6826	52.8465	32.1697
1611.7	210.767	143.071	128.719	78.6457	52.828	32.1686
1613.5	210.749	143.072	128.677	78.6093	52.8107	32.1682
1615.3	210.73	143.073	128.635	78.5732	52.7946	32.1688
1617.2	210.713	143.073	128.593	78.5369	52.7796	32.1702
1619.1	210.696	143.072	128.551	78.5006	52.766	32.1728
1620.9	210.678	143.069	128.509	78.4649	52.7539	32.1765
1622.7	210.659	143.065	128.466	78.4294	52.7435	32.1815
1624.5	210.641	143.059	128.423	78.394	52.735	32.188
1626.2	210.622	143.051	128.38	78.359	52.7279	32.1958
1627.9	210.603	143.043	128.338	78.3242	52.7219	32.2041
1629.7	210.585	143.034	128.295	78.2901	52.7166	32.2129
1631.4	210.566	143.025	128.254	78.257	52.7117	32.2216
1633.1	210.548	143.016	128.213	78.2247	52.7071	32.2302
1634.8	210.531	143.006	128.174	78.193	52.7029	32.2389
1636.4	210.515	142.997	128.135	78.1619	52.6987	32.2471
1637.9	210.501	142.988	128.097	78.1316	52.6941	32.2546
1639.5	210.488	142.98	128.061	78.1021	52.6892	32.2613
1641.1	210.475	142.972	128.026	78.0737	52.6842	32.2676
1642.6	210.463	142.964	127.993	78.0464	52.6791	32.2733
1644.1	210.451	142.956	127.96	78.0203	52.6743	32.2788
1645.7	210.44	142.947	127.929	77.9955	52.6694	32.2836
1647.2	210.429	142.94	127.899	77.9722	52.6636	32.287
1648.8	210.419	142.932	127.872	77.9507	52.657	32.2891
1650.4	210.41	142.926	127.847	77.931	52.6495	32.2897
1652	210.401	142.919	127.824	77.9129	52.6411	32.289
1653.6	210.394	142.913	127.803	77.896	52.6325	32.2874
1655.1	210.387	142.907	127.782	77.88	52.6237	32.2852
1656.7	210.382	142.901	127.763	77.8647	52.6146	32.2823
1658.2	210.378	142.896	127.744	77.85	52.6055	32.279
1659.7	210.376	142.889	127.727	77.836	52.5963	32.2753
1661.2	210.374	142.883	127.71	77.8225	52.5875	32.2714
1662.8	210.374	142.875	127.693	77.8091	52.5793	32.2678
1664.3	210.375	142.867	127.677	77.796	52.5713	32.2641
1665.9	210.379	142.86	127.661	77.7836	52.563	32.2597
1667.4	210.383	142.852	127.647	77.7719	52.5543	32.2543
1669	210.39	142.845	127.635	77.7614	52.5446	32.2476
1670.7	210.398	142.839	127.624	77.7517	52.5342	32.2396
1672.3	210.409	142.832	127.614	77.7424	52.5236	32.2311
1673.8	210.421	142.826	127.605	77.7336	52.5124	32.2216
1675.3	210.437	142.821	127.597	77.7253	52.5006	32.211
1676.9	210.454	142.815	127.59	77.7175	52.4882	32.1996
1678.4	210.472	142.81	127.584	77.7104	52.4756	32.1874
1679.9	210.492	142.805	127.579	77.704	52.4627	32.1747
1681.4	210.513	142.8	127.575	77.6982	52.4501	32.1618
1682.9	210.534	142.794	127.572	77.6931	52.4375	32.1485
1684.4	210.556	142.789	127.569	77.6889	52.4247	32.1347
1685.8	210.579	142.783	127.568	77.6856	52.4119	32.1204
1687.2	210.601	142.778	127.569	77.6835	52.399	32.1057
1688.6	210.624	142.772	127.57	77.6824	52.3862	32.0906
1690	210.647	142.767	127.572	77.6819	52.3737	32.0756
1691.4	210.67	142.761	127.574	77.682	52.3616	32.0606
1692.7	210.693	142.754	127.577	77.6826	52.3499	32.0456
1694.1	210.717	142.748	127.581	77.6836	52.3387	32.0309
1695.4	210.74	142.741	127.585	77.6854	52.3282	32.0167
1696.8	210.762	142.733	127.589	77.6876	52.3187	32.003
1698.1	210.784	142.724	127.594	77.6903	52.3102	31.9903
1699.5	210.805	142.715	127.598	77.6935	52.3026	31.9781
1700.8	210.825	142.706	127.604	77.6974	52.2954	31.9661
1702.2	210.846	142.697	127.61	77.702	52.2886	31.9541
1703.6	210.866	142.687	127.617	77.7075	52.282	31.942
1705	210.886	142.678	127.625	77.7138	52.2754	31.9296
1706.5	210.906	142.67	127.634	77.7208	52.269	31.9173
1708	210.926	142.661	127.644	77.7285	52.2627	31.9046
1709.4	210.946	142.653	127.654	77.737	52.2561	31.8914
1710.9	210.967	142.645	127.666	77.7463	52.2495	31.878
1712.3	210.986	142.638	127.678	77.7564	52.2432	31.8645
1713.8	211.005	142.63	127.692	77.7674	52.2372	31.8512
1715.2	211.023	142.623	127.705	77.7791	52.2319	31.8384
1716.7	211.039	142.615	127.72	77.7917	52.2272	31.8258
1718.1	211.055	142.609	127.736	77.8052	52.2225	31.8131
1719.5	211.069	142.602	127.752	77.8198	52.2181	31.8004
1720.9	211.082	142.596	127.77	77.8353	52.214	31.7878
1722.3	211.094	142.591	127.788	77.8517	52.2101	31.7753
1723.7	211.104	142.585	127.807	77.8688	52.2067	31.7631
1725	211.115	142.58	127.826	77.8865	52.2038	31.7511
1726.3	211.124	142.575	127.846	77.9045	52.2012	31.7393
1727.7	211.134	142.57	127.866	77.9228	52.1991	31.7278
1729	211.143	142.565	127.887	77.9415	52.1976	31.7169
1730.4	211.151	142.559	127.907	77.9604	52.1968	31.7065
1731.7	211.159	142.554	127.928	77.9792	52.1969	31.6969
1733.1	211.166	142.548	127.948	77.9981	52.1978	31.6879
1734.4	211.174	142.542	127.969	78.0171	52.1991	31.6793
1735.8	211.181	142.537	127.99	78.0362	52.201	31.6711
1737.2	211.187	142.531	128.011	78.0556	52.2032	31.6633
1738.6	211.194	142.526	128.032	78.0749	52.2059	31.6557
1740	211.201	142.521	128.053	78.094	52.2092	31.6487
1741.3	211.208	142.515	128.074	78.1129	52.213	31.6421
1742.7	211.216	142.51	128.094	78.1315	52.2172	31.6359
1744	211.224	142.504	128.115	78.1498	52.2219	31.6302
1745.3	211.232	142.499	128.135	78.1679	52.2273	31.6252
1746.7	211.239	142.494	128.156	78.1859	52.2336	31.6209
1748	211.245	142.489	128.175	78.2036	52.2408	31.6177
1749.3	211.25	142.483	128.195	78.2212	52.2489	31.6154
1750.7	211.255	142.478	128.214	78.2385	52.2579	31.614
1752	211.258	142.473	128.233	78.2558	52.2679	31.6136
1753.4	211.26	142.468	128.252	78.273	52.2789	31.6143
1754.7	211.26	142.463	128.271	78.2901	52.2909	31.6162
1756.1	211.259	142.458	128.289	78.3067	52.3041	31.6192
1757.5	211.258	142.453	128.306	78.3228	52.3183	31.6234
1758.8	211.256	142.448	128.322	78.3383	52.3336	31.6288
1760.1	211.253	142.443	128.338	78.353	52.3501	31.6355
1761.4	211.249	142.438	128.353	78.3673	52.3679	31.6437
1762.6	211.243	142.433	128.367	78.3808	52.387	31.6534
1763.9	211.237	142.428	128.381	78.3936	52.4075	31.6647
1765.2	211.229	142.422	128.393	78.4058	52.4293	31.6774
1766.4	211.22	142.417	128.405	78.4175	52.4519	31.6911
1767.6	211.211	142.412	128.416	78.4287	52.4754	31.7057
1768.8	211.201	142.406	128.427	78.4398	52.4995	31.721
1770	211.19	142.401	128.438	78.4506	52.524	31.7368
1771.3	211.18	142.396	128.448	78.4611	52.549	31.7532
1772.6	211.169	142.391	128.458	78.4714	52.5743	31.7698
1773.8	211.158	142.386	128.468	78.4816	52.5995	31.7864
1775	211.147	142.381	128.478	78.4916	52.6249	31.8031
1776.2	211.136	142.377	128.488	78.5016	52.6503	31.8201
1777.3	211.124	142.372	128.498	78.5115	52.676	31.8372
1778.5	211.112	142.368	128.508	78.5212	52.702	31.8546
1779.7	211.1	142.363	128.517	78.531	52.728	31.8722
1780.8	211.088	142.359	128.527	78.5409	52.7536	31.8894
1782	211.075	142.355	128.537	78.5512	52.7789	31.9061
1783.2	211.062	142.351	128.548	78.5617	52.8038	31.9224
1784.4	211.05	142.348	128.559	78.5725	52.8282	31.9383
1785.6	211.037	142.344	128.569	78.5833	52.8525	31.9539
1786.9	211.025	142.341	128.58	78.594	52.8764	31.9694
1788.2	211.012	142.337	128.591	78.6045	52.9001	31.9846
1789.4	211.001	142.334	128.601	78.6149	52.9237	31.9996
1790.7	210.989	142.331	128.612	78.625	52.9469	32.0145
1791.9	210.978	142.328	128.622	78.6349	52.9701	32.0293
1793.1	210.966	142.324	128.631	78.6442	52.9932	32.0442
1794.4	210.956	142.321	128.64	78.6533	53.0161	32.059
1795.6	210.945	142.318	128.65	78.6623	53.0385	32.0732
1796.9	210.936	142.314	128.659	78.6712	53.06	32.0866
1798.2	210.927	142.311	128.669	78.6803	53.0806	32.099
1799.5	210.92	142.308	128.679	78.6896	53.1002	32.1104
1800.9	210.913	142.305	128.689	78.6987	53.119	32.121
1802.3	210.908	142.302	128.699	78.7077	53.1368	32.1306
1803.6	210.904	142.3	128.709	78.7168	53.1535	32.139
1804.9	210.901	142.297	128.719	78.7258	53.1692	32.1464
1806.1	210.899	142.294	128.73	78.7346	53.184	32.1531
1807.2	210.897	142.291	128.74	78.7432	53.1982	32.1592
1808.3	210.896	142.289	128.75	78.7514	53.2121	32.1651
1809.4	210.895	142.286	128.759	78.7593	53.2254	32.1707
1810.5	210.894	142.284	128.768	78.7668	53.2381	32.1757
1811.6	210.894	142.282	128.777	78.774	53.2503	32.1805
1812.6	210.893	142.28	128.785	78.7809	53.2621	32.185
1813.7	210.892	142.279	128.793	78.7873	53.2735	32.1894
1814.7	210.892	142.278	128.801	78.7931	53.2846	32.1937
1815.7	210.891	142.277	128.808	78.7984	53.2953	32.1978
1816.8	210.891	142.276	128.814	78.8031	53.3055	32.2017
1817.8	210.89	142.275	128.819	78.807	53.3154	32.2056
1818.9	210.889	142.275	128.824	78.8101	53.3253	32.2099
1820	210.888	142.275	128.827	78.8124	53.3351	32.2144
1821.1	210.886	142.275	128.83	78.8136	53.3451	32.2196
1822.2	210.884	142.276	128.831	78.8139	53.355	32.225
1823.4	210.882	142.276	128.832	78.8136	53.3645	32.2302
1824.6	210.88	142.278	128.832	78.8126	53.3733	32.2352
1825.8	210.878	142.279	128.831	78.8111	53.3813	32.2396
1826.9	210.877	142.281	128.83	78.809	53.3884	32.2434
1828	210.876	142.283	128.828	78.8064	53.3947	32.2467
1829.1	210.876	142.285	128.826	78.8033	53.3999	32.249
1830.1	210.877	142.288	128.824	78.7999	53.4037	32.2502
1831.2	210.879	142.291	128.821	78.796	53.4063	32.2505
1832.2	210.881	142.294	128.818	78.7914	53.408	32.2501
1833.3	210.883	142.298	128.814	78.7862	53.4088	32.2493
1834.3	210.885	142.302	128.809	78.7801	53.4091	32.2482
1835.4	210.887	142.306	128.804	78.7733	53.4086	32.2468
1836.5	210.89	142.311	128.797	78.7659	53.4068	32.2445
1837.5	210.893	142.317	128.79	78.7578	53.404	32.2415
1838.6	210.897	142.323	128.783	78.7491	53.4001	32.2379
1839.7	210.9	142.329	128.775	78.7398	53.3953	32.2335
1840.9	210.904	142.335	128.766	78.7298	53.3896	32.2287
1842	210.908	142.342	128.756	78.7194	53.3832	32.2234
1843.1	210.913	142.349	128.747	78.7085	53.3761	32.2176
1844.3	210.918	142.357	128.736	78.6972	53.3683	32.2113
1845.4	210.923	142.364	128.726	78.6853	53.3601	32.2049
1846.5	210.928	142.372	128.714	78.673	53.3516	32.1984
1847.6	210.932	142.379	128.703	78.6602	53.3431	32.1921
1848.7	210.937	142.387	128.69	78.647	53.3343	32.1857
1849.8	210.942	142.395	128.678	78.6335	53.3252	32.179
1851.1	210.947	142.403	128.665	78.6197	53.3155	32.172
1852.4	210.952	142.411	128.652	78.6058	53.3053	32.1645
1853.8	210.958	142.419	128.639	78.5917	53.2947	32.1567
1855.2	210.964	142.427	128.626	78.5775	53.2839	32.1487
1857.1	210.97	142.434	128.613	78.5633	53.2729	32.1405
1859.1	210.976	142.442	128.6	78.5492	53.2617	32.132
1861.2	210.983	142.449	128.587	78.5351	53.2502	32.1233
1863.3	210.99	142.457	128.574	78.5209	53.2387	32.1145
1865.5	210.996	142.464	128.561	78.5066	53.2271	32.1057
1867.7	211.003	142.471	128.547	78.4921	53.2156	32.0972
1870	211.009	142.479	128.534	78.4773	53.2041	32.0887
1872.4	211.015	142.486	128.52	78.4625	53.1927	32.0803
1875	211.02	142.493	128.506	78.4474	53.1813	32.0721
1877.5	211.026	142.5	128.491	78.4321	53.1699	32.064
1880	211.031	142.508	128.477	78.4167	53.1586	32.0561
1882.6	211.035	142.515	128.462	78.4012	53.1477	32.0485
1885.1	211.039	142.522	128.447	78.3857	53.1373	32.0414
1887.6	211.043	142.528	128.433	78.3704	53.1274	32.0347
1890.2	211.046	142.535	128.418	78.3553	53.1181	32.0285
1892.7	211.049	142.541	128.403	78.3401	53.1094	32.023
1895.4	211.05	142.547	128.389	78.325	53.1015	32.0181
1898	211.051	142.552	128.374	78.31	53.0945	32.0141
1900.7	211.052	142.557	128.36	78.2951	53.0882	32.0107
1903.5	211.052	142.563	128.345	78.2803	53.0823	32.0077
1906.4	211.051	142.567	128.331	78.2657	53.0768	32.0049
1909.3	211.051	142.572	128.316	78.2512	53.0713	32.0022
1912.3	211.05	142.577	128.302	78.2368	53.066	31.9995
1915.3	211.049	142.581	128.288	78.2227	53.0608	31.9969
1918.3	211.048	142.585	128.274	78.2088	53.0556	31.9942
1921.3	211.048	142.589	128.261	78.1952	53.0502	31.9912
1924.3	211.047	142.593	128.248	78.1819	53.0447	31.9879
1927.3	211.046	142.597	128.235	78.1688	53.0391	31.9845
1930.3	211.046	142.6	128.222	78.1559	53.0334	31.9811
1933.3	211.045	142.603	128.21	78.1433	53.028	31.9777
1936.3	211.044	142.606	128.197	78.1309	53.0224	31.9741
1939.4	211.043	142.609	128.185	78.1187	53.0164	31.9701
1942.3	211.043	142.612	128.174	78.1068	53.0101	31.9656
1945.3	211.043	142.615	128.162	78.0951	53.0032	31.9606
1948.2	211.043	142.618	128.151	78.0838	52.996	31.9552
1951.1	211.043	142.621	128.14	78.0728	52.9888	31.9497
1953.8	211.043	142.623	128.13	78.0624	52.9817	31.944
1956.4	211.043	142.625	128.12	78.0525	52.9747	31.9382
1958.9	211.042	142.626	128.111	78.0433	52.968	31.9325
1961.3	211.042	142.628	128.103	78.0346	52.9616	31.9268
1963.7	211.041	142.628	128.095	78.0267	52.9557	31.9214
1966.1	211.04	142.629	128.088	78.0195	52.9506	31.9163
1969.1	211.039	142.628	128.082	78.0131	52.946	31.9115
1972.1	211.037	142.628	128.076	78.0075	52.9417	31.9067
1975.1	211.036	142.627	128.071	78.0027	52.9376	31.9017
1978.1	211.034	142.625	128.068	77.9987	52.9334	31.8964
1981.1	211.033	142.624	128.065	77.9954	52.9293	31.8908
1984.1	211.032	142.621	128.063	77.9932	52.9256	31.8852
1987.1	211.03	142.618	128.062	77.9919	52.9223	31.8796
1990.1	211.029	142.615	128.062	77.9917	52.9192	31.8738
1993.1	211.028	142.611	128.063	77.9924	52.9163	31.8679
1996.2	211.026	142.607	128.064	77.9937	52.9137	31.8619
1999.2	211.025	142.603	128.067	77.9958	52.9112	31.8559
2002.2	211.023	142.598	128.069	77.9983	52.9091	31.8501
2005.2	211.021	142.593	128.073	78.0012	52.9072	31.8443
2008.2	211.02	142.588	128.076	78.0046	52.9054	31.8384
[truncated: 1,000 more rows]
