# Supplementary material for: Numerical Simulation of Dry Granular Flow Impacting a Rigid Wall Using the Discrete Element Method
Source: PLoS One. 2016 Aug 11;11(8):e0160756. doi: 10.1371/journal.pone.0160756 (PMC4981468; doi:10.1371/journal.pone.0160756)
Supplement: S3 File — (XLS) [file pone.0160756.s003.xls]

## Sheet: Sheet1
0.036389	1.32413e-05	-6.34801e-05
0.11549	1.56266e-05	-6.49006e-05
0.24433	1.80603e-05	-6.63417e-05
0.4542	2.05469e-05	-6.78047e-05
0.79606	2.30884e-05	-6.92901e-05
1.3529	2.56887e-05	-7.0799e-05
2.26	2.83465e-05	-7.23312e-05
3.7374	3.10578e-05	-7.38856e-05
6.1441	3.38251e-05	-7.5463e-05
9.154	3.66499e-05	-7.70638e-05
12.164	3.9522e-05	-7.86892e-05
15.174	4.2429e-05	-8.03415e-05
18.184	4.53615e-05	-8.20215e-05
21.194	4.83057e-05	-8.37305e-05
24.203	5.12578e-05	-8.547e-05
27.213	5.42186e-05	-8.72408e-05
30.223	5.71747e-05	-8.9045e-05
33.233	6.01147e-05	-9.08846e-05
36.243	6.3037e-05	-9.27595e-05
39.253	6.59395e-05	-9.46694e-05
42.263	6.88189e-05	-9.6615e-05
45.273	7.16756e-05	-9.85962e-05
48.283	7.4496e-05	-0.000100615
51.293	7.72618e-05	-0.000102674
54.302	7.99671e-05	-0.000104773
57.312	8.26028e-05	-0.000106915
60.322	8.51706e-05	-0.000109098
63.332	8.76811e-05	-0.000111324
66.342	9.01315e-05	-0.000113594
69.352	9.25231e-05	-0.000115907
72.362	9.48546e-05	-0.000118265
75.372	9.71189e-05	-0.000120668
78.382	9.9321e-05	-0.000123117
81.391	0.000101466	-0.000125612
84.401	0.000103539	-0.000128154
87.411	0.000105519	-0.000130746
90.421	0.000107396	-0.00013339
93.431	0.000109152	-0.000136089
96.441	0.000110786	-0.000138842
99.451	0.000112309	-0.000141649
102.46	0.000113707	-0.000144514
105.47	0.00011497	-0.000147436
108.44	0.000116103	-0.000150416
111.32	0.00011711	-0.000153453
114.12	0.000117995	-0.000156546
116.86	0.00011877	-0.000159695
119.53	0.000119427	-0.000162899
121.92	0.000119952	-0.000166162
124.27	0.000120351	-0.000169481
126.63	0.000120624	-0.000172857
128.74	0.000120769	-0.000176291
131.2	0.000120787	-0.000179783
133.6	0.000120673	-0.000183335
135.8	0.000120421	-0.000186948
138.02	0.000120037	-0.000190622
140.25	0.000119527	-0.000194354
142.38	0.000118891	-0.000198146
144.44	0.000118133	-0.000201997
146.44	0.000117239	-0.00020591
148.4	0.000116182	-0.000209887
150.33	0.000114955	-0.000213932
152.23	0.000113542	-0.000218045
154.12	0.000111934	-0.000222229
156.02	0.000110133	-0.000226483
157.88	0.000108118	-0.000230811
159.69	0.000105874	-0.000235215
161.5	0.000103404	-0.000239695
163.3	0.000100719	-0.00024425
165.1	9.78184e-05	-0.000248878
166.89	9.47119e-05	-0.000253581
168.69	9.13846e-05	-0.000258359
170.47	8.7811e-05	-0.000263216
172.23	8.39927e-05	-0.000268152
173.98	7.99258e-05	-0.000273169
175.71	7.56146e-05	-0.000278266
177.42	7.10768e-05	-0.000283441
179.11	6.63121e-05	-0.000288697
180.8	6.13233e-05	-0.000294032
182.47	5.61187e-05	-0.000299448
184.12	5.07011e-05	-0.000304943
185.76	4.50829e-05	-0.000310517
187.39	3.92788e-05	-0.000316169
189.01	3.32774e-05	-0.000321901
190.62	2.70605e-05	-0.000327715
192.22	2.06252e-05	-0.000333612
193.8	1.39598e-05	-0.000339594
195.38	7.07351e-06	-0.000345661
196.95	-1.20398e-08	-0.000351811
198.51	-7.30316e-06	-0.000358046
200.06	-1.48013e-05	-0.000364365
201.61	-2.25063e-05	-0.000370771
203.15	-3.04281e-05	-0.000377263
204.69	-3.85639e-05	-0.000383841
206.34	-4.69105e-05	-0.000390506
207.9	-5.54754e-05	-0.000397258
209.43	-6.42643e-05	-0.000404099
210.94	-7.32824e-05	-0.00041103
212.43	-8.25377e-05	-0.000418051
213.91	-9.20203e-05	-0.000425162
215.38	-0.000101713	-0.000432363
216.85	-0.000111612	-0.000439654
218.32	-0.000121707	-0.000447034
219.79	-0.000132	-0.000454504
221.27	-0.0001425	-0.000462064
222.76	-0.000153198	-0.000469716
224.26	-0.000164087	-0.000477457
225.77	-0.000175186	-0.000485292
227.28	-0.000186517	-0.000493222
228.79	-0.000198096	-0.000501251
230.29	-0.000209949	-0.000509381
231.76	-0.000222077	-0.000517614
233.21	-0.000234473	-0.000525949
234.64	-0.00024716	-0.000534389
236.06	-0.000260153	-0.000542937
237.47	-0.000273454	-0.000551593
238.87	-0.000287064	-0.000560358
240.26	-0.000300986	-0.000569232
241.65	-0.000315212	-0.000578216
243.05	-0.000329766	-0.000587311
244.47	-0.000344676	-0.000596523
245.91	-0.000359948	-0.000605851
247.34	-0.000375596	-0.000615299
248.76	-0.00039161	-0.000624865
250.18	-0.000407965	-0.000634548
251.59	-0.000424661	-0.000644348
253	-0.000441688	-0.000654265
254.41	-0.000459045	-0.0006643
255.81	-0.000476737	-0.000674453
257.2	-0.00049475	-0.000684724
258.59	-0.000513066	-0.000695111
259.97	-0.000531708	-0.000705617
261.35	-0.000550706	-0.000716247
262.72	-0.00057007	-0.000727001
264.09	-0.000589829	-0.000737885
265.46	-0.000609972	-0.000748896
266.82	-0.000630474	-0.000760034
268.17	-0.000651352	-0.0007713
269.52	-0.000672613	-0.000782696
270.86	-0.000693949	-0.000794169
272.2	-0.000714925	-0.000805644
273.54	-0.00073527	-0.000817075
274.87	-0.000754578	-0.000828391
276.2	-0.000772678	-0.000839563
277.52	-0.000789525	-0.000850583
278.84	-0.000804691	-0.000861377
280.15	-0.000817771	-0.000871874
281.46	-0.00082874	-0.000882071
282.77	-0.000837576	-0.000891966
284.07	-0.000844162	-0.00090154
285.37	-0.000848514	-0.000910794
286.66	-0.000850203	-0.000919656
287.95	-0.00084862	-0.000928021
289.23	-0.000843603	-0.000935859
290.5	-0.000834872	-0.000943126
291.75	-0.000822427	-0.000949819
293	-0.000806539	-0.000955985
294.25	-0.000787078	-0.000961603
295.49	-0.000764014	-0.000966665
296.74	-0.000737299	-0.000971166
297.98	-0.000706729	-0.000975069
299.23	-0.000672407	-0.000978393
300.48	-0.00063446	-0.000981159
301.73	-0.000592384	-0.000983282
302.97	-0.000545547	-0.000984651
304.21	-0.00049361	-0.000985209
305.45	-0.000436005	-0.000984858
306.7	-0.000372698	-0.000983591
307.9	-0.000303929	-0.000981451
309.08	-0.000229255	-0.00097836
310.25	-0.00014835	-0.000974262
311.41	-6.13798e-05	-0.000969187
312.56	3.15337e-05	-0.000963158
313.7	0.000130239	-0.000956201
314.84	0.000234385	-0.000948378
315.97	0.000344218	-0.000939647
317.11	0.000460154	-0.000929937
318.24	0.000582016	-0.000919278
319.37	0.000709756	-0.000907682
320.51	0.00084351	-0.000895123
321.65	0.000983294	-0.0008816
322.79	0.00112927	-0.000867083
323.95	0.00128169	-0.000851531
325.11	0.00144038	-0.000834975
326.28	0.00160505	-0.000817462
327.43	0.00177576	-0.000798989
328.57	0.0019524	-0.00077957
329.69	0.00213546	-0.000759123
330.8	0.00232575	-0.000737507
331.91	0.00252357	-0.000714672
333	0.00272942	-0.00069053
334.09	0.00294357	-0.000665033
335.18	0.00316604	-0.000638181
336.26	0.00339745	-0.000609865
337.34	0.00363841	-0.00057998
338.43	0.00388871	-0.000548562
339.51	0.00414807	-0.000515664
340.6	0.00441646	-0.000481288
341.7	0.0046936	-0.000445486
342.8	0.00497997	-0.000408174
343.9	0.00527641	-0.000369207
345.03	0.00558287	-0.000328594
346.16	0.00589947	-0.000286315
347.3	0.00622613	-0.000242384
348.44	0.00656235	-0.000196888
349.56	0.00690819	-0.000149817
350.67	0.00726361	-0.000101175
351.78	0.00762839	-5.10042e-05
352.88	0.00800242	6.78288e-07
353.98	0.00838537	5.38158e-05
355.07	0.00877684	0.000108335
356.15	0.00917719	0.000164302
357.23	0.00958703	0.000221821
358.31	0.0100065	0.000280909
359.39	0.0104359	0.000341632
360.46	0.010875	0.000403949
361.54	0.0113233	0.000467756
362.61	0.011781	0.00053309
363.68	0.0122481	0.000599969
364.76	0.0127246	0.00066839
365.84	0.0132109	0.000738402
366.94	0.0137068	0.000809994
368.03	0.0142124	0.000883148
369.12	0.0147277	0.000957907
370.19	0.0152531	0.00103431
371.26	0.0157887	0.00111238
372.31	0.0163347	0.00119216
373.35	0.016891	0.0012736
374.39	0.0174569	0.00135663
375.41	0.0180325	0.00144124
376.43	0.0186175	0.00152737
377.43	0.019212	0.00161504
378.43	0.0198161	0.00170429
379.43	0.0204298	0.00179509
380.42	0.0210528	0.0018874
381.42	0.0216857	0.00198133
382.41	0.0223292	0.00207699
383.41	0.0229838	0.00217448
384.41	0.0236504	0.00227393
385.43	0.024329	0.00237537
386.45	0.0250195	0.00247875
387.49	0.0257225	0.0025842
388.54	0.0264386	0.00269182
389.57	0.0271679	0.00280161
390.59	0.0279104	0.00291358
391.61	0.0286661	0.00302774
392.61	0.029435	0.00314407
393.62	0.0302177	0.00326269
394.62	0.0310151	0.00338375
395.62	0.0318275	0.00350729
396.62	0.0326553	0.00363339
397.63	0.0334982	0.003762
398.64	0.0343556	0.00389299
399.66	0.0352273	0.00402638
400.69	0.0361133	0.00416211
401.7	0.0370135	0.00430019
402.71	0.037928	0.00444066
403.71	0.0388565	0.00458342
404.7	0.0397985	0.00472842
405.69	0.0407547	0.00487576
406.68	0.041726	0.0050256
407.66	0.0427128	0.00517802
408.63	0.0437159	0.00533316
409.61	0.0447352	0.00549097
410.58	0.0457699	0.00565134
411.55	0.0468204	0.00581434
412.52	0.0478872	0.00598004
413.49	0.048967	0.00614803
414.46	0.0500554	0.00631781
415.41	0.0511497	0.00648902
416.36	0.0522454	0.00666111
417.3	0.0533411	0.00683393
418.24	0.0544367	0.00700749
419.18	0.0555278	0.00718127
420.12	0.0566104	0.00735479
421.06	0.0576843	0.00752802
422	0.058749	0.00770088
422.95	0.0598033	0.00787323
423.9	0.0608476	0.00804511
424.87	0.0618772	0.00821598
425.84	0.0628862	0.0083851
426.8	0.0638727	0.00855224
427.75	0.0648338	0.00871704
428.68	0.0657699	0.00887958
429.6	0.0666841	0.00904026
430.52	0.0675753	0.00919896
431.43	0.0684436	0.00935574
432.34	0.0692887	0.00951054
433.24	0.0701082	0.00966309
434.15	0.0709037	0.00981358
435.05	0.0716766	0.00996223
435.96	0.0724219	0.0101084
436.87	0.073133	0.0102513
437.79	0.0738063	0.0103905
438.72	0.0744361	0.0105253
439.66	0.0750222	0.0106557
440.61	0.0755675	0.0107821
441.56	0.0760675	0.0109039
442.49	0.076519	0.0110207
443.42	0.0769237	0.0111328
444.33	0.0772827	0.0112403
445.25	0.0775978	0.0113434
446.16	0.0778726	0.0114426
447.07	0.0781045	0.0115374
447.97	0.0782894	0.0116275
448.88	0.0784291	0.0117131
449.8	0.0785238	0.0117941
450.71	0.0785726	0.0118705
451.63	0.0785755	0.0119423
452.56	0.078531	0.0120093
453.49	0.0784368	0.0120713
454.41	0.0782948	0.0121285
455.34	0.0781075	0.0121812
456.27	0.0778749	0.0122293
457.19	0.077598	0.0122731
458.11	0.0772719	0.012312
459.03	0.0768884	0.0123449
459.96	0.0764446	0.0123715
460.89	0.0759351	0.0123911
461.84	0.0753575	0.0124035
462.77	0.0747116	0.0124087
463.7	0.0739914	0.0124059
464.62	0.0731906	0.0123943
465.53	0.0723114	0.0123744
466.45	0.0713568	0.0123463
467.36	0.070327	0.0123102
468.25	0.069225	0.0122664
469.15	0.068046	0.0122143
470.03	0.0667815	0.0121529
470.92	0.065432	0.0120823
471.8	0.0639964	0.0120023
472.68	0.0624757	0.0119131
473.56	0.0608755	0.0118154
474.42	0.0591955	0.0117092
475.28	0.0574365	0.0115945
476.13	0.0556009	0.0114718
476.99	0.0536898	0.0113411
477.84	0.051707	0.0112029
478.7	0.0496572	0.0110579
479.56	0.0475364	0.0109055
480.43	0.0453387	0.010745
481.31	0.0430631	0.0105763
482.18	0.0407056	0.010399
483.06	0.0382692	0.0102134
483.94	0.0357605	0.0100204
484.8	0.0331774	0.00981969
485.66	0.0305192	0.00961124
486.51	0.027786	0.00939505
487.35	0.0249747	0.00917075
488.19	0.0220861	0.00893845
489.03	0.0191214	0.00869828
489.87	0.0160781	0.00844996
490.71	0.012954	0.00819323
491.56	0.00974775	0.00792793
492.4	0.0064566	0.00765372
493.25	0.00308364	0.007371
494.09	-0.000365833	0.00708045
494.92	-0.00389081	0.00678222
495.76	-0.00748836	0.00647668
496.59	-0.0111588	0.00616382
497.42	-0.0149052	0.00584325
498.25	-0.0187246	0.00551533
499.08	-0.022615	0.00518036
499.91	-0.0265825	0.00483757
500.73	-0.0306345	0.00448608
501.55	-0.0347762	0.00412526
502.37	-0.0390158	0.00375408
503.19	-0.0433542	0.00337248
504.01	-0.0477891	0.00298076
504.83	-0.0523277	0.00257803
505.64	-0.0569758	0.0021636
506.44	-0.0617332	0.00173751
507.25	-0.0666007	0.00129965
508.05	-0.071579	0.000849962
508.85	-0.0766663	0.000388666
509.66	-0.0818696	-8.50778e-05
510.46	-0.0871985	-0.00057244
511.26	-0.0926551	-0.00107366
512.06	-0.0982436	-0.00158927
512.87	-0.103961	-0.0021189
513.67	-0.1098	-0.00266153
514.47	-0.11576	-0.00321715
515.28	-0.121838	-0.00378543
516.08	-0.128035	-0.00436623
516.89	-0.134351	-0.00495985
517.69	-0.140782	-0.00556566
518.49	-0.147324	-0.00618299
519.29	-0.153982	-0.00681273
520.09	-0.160767	-0.00745604
520.9	-0.167683	-0.00811341
521.71	-0.174739	-0.00878588
522.52	-0.181931	-0.0094731
523.34	-0.189251	-0.010174
524.16	-0.196705	-0.0108893
524.98	-0.204297	-0.0116194
525.79	-0.212007	-0.0123625
526.6	-0.219815	-0.0131168
527.41	-0.227705	-0.0138807
528.2	-0.235651	-0.0146518
529	-0.243648	-0.0154298
529.78	-0.251699	-0.0162151
530.57	-0.259779	-0.0170054
531.35	-0.26787	-0.0177992
532.14	-0.27597	-0.018596
532.93	-0.284072	-0.0193954
533.71	-0.292173	-0.0201969
534.5	-0.300272	-0.0210005
535.28	-0.308347	-0.021804
536.06	-0.316365	-0.0226046
536.84	-0.324316	-0.0234013
537.61	-0.332184	-0.0241925
538.39	-0.339972	-0.0249787
539.16	-0.347701	-0.0257619
539.94	-0.355367	-0.0265418
540.71	-0.362972	-0.0273189
541.49	-0.370515	-0.028093
542.3	-0.377982	-0.0288628
543.11	-0.385384	-0.0296295
543.92	-0.392732	-0.030394
544.74	-0.399996	-0.0311537
545.56	-0.407143	-0.0319056
546.39	-0.414154	-0.0326478
547.2	-0.420996	-0.0333774
548.01	-0.427672	-0.0340946
548.82	-0.434199	-0.0348012
549.62	-0.440553	-0.0354952
550.42	-0.446719	-0.0361749
551.22	-0.452705	-0.0368413
552.02	-0.458515	-0.0374947
552.83	-0.46416	-0.0381358
553.65	-0.469659	-0.0387666
554.46	-0.474998	-0.0393857
555.26	-0.480155	-0.0399911
556.05	-0.485138	-0.0405835
556.82	-0.489949	-0.0411629
557.59	-0.494583	-0.0417291
558.35	-0.499043	-0.0422825
559.1	-0.503322	-0.0428224
559.85	-0.50741	-0.0433478
560.6	-0.511314	-0.0438598
561.35	-0.515049	-0.0443592
562.09	-0.518615	-0.0448462
562.84	-0.522017	-0.0453215
563.6	-0.52523	-0.0457826
564.36	-0.528212	-0.0462257
565.13	-0.530947	-0.0466494
565.91	-0.533407	-0.0470512
566.7	-0.535579	-0.0474298
567.48	-0.537465	-0.0477856
568.24	-0.539032	-0.0481156
569	-0.540249	-0.0484169
569.75	-0.541127	-0.0486905
570.49	-0.54168	-0.0489378
571.22	-0.541911	-0.0491589
571.96	-0.541835	-0.0493553
572.69	-0.541428	-0.0495246
573.42	-0.540644	-0.0496629
574.16	-0.539487	-0.0497704
574.9	-0.53795	-0.0498466
575.64	-0.536042	-0.0498922
576.39	-0.533795	-0.0499104
577.15	-0.531208	-0.0499012
577.92	-0.528288	-0.0498655
578.7	-0.52505	-0.0498046
579.48	-0.521498	-0.049719
580.25	-0.517656	-0.0496108
581.02	-0.51355	-0.0494827
581.78	-0.509161	-0.0493329
582.53	-0.504457	-0.0491585
583.29	-0.499433	-0.0489592
584.04	-0.494069	-0.048733
584.8	-0.488382	-0.0484817
585.55	-0.482412	-0.0482091
586.32	-0.476147	-0.0479143
587.08	-0.469586	-0.0475971
587.85	-0.46273	-0.0472577
588.62	-0.455561	-0.0468943
589.37	-0.448084	-0.0465075
590.13	-0.440305	-0.0460977
590.88	-0.432212	-0.0456639
591.62	-0.423794	-0.0452052
592.37	-0.415043	-0.0447209
593.12	-0.405945	-0.0442095
593.87	-0.396519	-0.0436729
594.62	-0.386795	-0.0431141
595.38	-0.376781	-0.042534
596.14	-0.366496	-0.0419344
596.89	-0.355937	-0.0413152
597.63	-0.345088	-0.0406746
598.35	-0.333966	-0.0400145
599.07	-0.322584	-0.039336
599.78	-0.310909	-0.0386362
600.49	-0.298902	-0.0379114
601.19	-0.286535	-0.0371593
601.89	-0.273764	-0.0363755
602.59	-0.260586	-0.0355599
603.29	-0.247015	-0.0347139
603.98	-0.233012	-0.033834
604.69	-0.218548	-0.0329175
605.39	-0.203624	-0.0319646
606.1	-0.188236	-0.0309748
606.82	-0.172381	-0.0299479
607.55	-0.15607	-0.0288851
608.28	-0.139265	-0.0277827
609.01	-0.121916	-0.0266362
609.73	-0.104012	-0.0254446
610.44	-0.0855296	-0.0242058
611.14	-0.0664859	-0.0229214
611.83	-0.0469275	-0.0215959
612.53	-0.0268555	-0.0202295
613.21	-0.00628572	-0.0188238
613.9	0.0147755	-0.0173794
614.58	0.0363412	-0.0158951
615.27	0.0583822	-0.0143738
615.96	0.0808683	-0.0128183
616.65	0.103839	-0.0112251
617.34	0.127344	-0.00958951
618.07	0.151405	-0.00790952
618.83	0.176069	-0.0061809
619.59	0.201319	-0.00440528
620.36	0.227107	-0.00258715
621.13	0.253464	-0.000723879
621.89	0.280402	0.00118582
622.65	0.307859	0.00313709
623.4	0.335763	0.00512503
624.17	0.364054	0.00714487
624.94	0.392636	0.00918926
625.7	0.421498	0.0112578
626.45	0.450657	0.0133521
627.2	0.480033	0.0154666
627.94	0.509561	0.0175965
628.68	0.539229	0.0197409
629.42	0.569011	0.0218971
630.15	0.598889	0.024064
630.89	0.628863	0.0262413
631.63	0.65885	0.0284229
632.37	0.68874	0.030601
633.12	0.718494	0.0327723
633.88	0.748051	0.034932
634.63	0.777431	0.0370823
635.39	0.806715	0.0392295
636.14	0.835894	0.0413732
636.89	0.864988	0.0435156
637.62	0.893991	0.045656
638.34	0.922854	0.0477906
639.05	0.951619	0.049923
639.75	0.980329	0.0520566
640.45	1.00888	0.0541839
641.14	1.03716	0.056296
641.83	1.0651	0.0583879
642.52	1.09257	0.0604506
643.2	1.11959	0.0624855
643.89	1.14624	0.0644984
644.58	1.17243	0.0664833
645.27	1.19811	0.0684365
645.97	1.2233	0.0703598
646.67	1.24802	0.0722535
647.38	1.2723	0.07412
648.1	1.2962	0.0759642
648.82	1.31968	0.0777823
649.56	1.34266	0.0795685
650.28	1.36517	0.0813246
650.99	1.3872	0.0830501
651.69	1.40874	0.0847445
652.38	1.42981	0.0864096
653.07	1.4504	0.0880437
653.76	1.47045	0.0896447
654.44	1.49002	0.0912148
655.12	1.50912	0.0927562
655.8	1.52778	0.0942693
656.48	1.546	0.0957561
657.16	1.56371	0.0972098
657.85	1.58076	0.09862
658.54	1.59708	0.0999826
659.23	1.61258	0.10129
659.93	1.62723	0.10254
660.64	1.64103	0.103733
661.36	1.65386	0.10486
662.1	1.66562	0.105915
662.84	1.67634	0.106899
663.59	1.68609	0.107816
664.34	1.69485	0.108667
665.09	1.70268	0.109455
665.82	1.70951	0.110173
666.55	1.71516	0.110811
667.26	1.71966	0.11137
667.97	1.72298	0.111847
668.68	1.72516	0.112246
669.38	1.72631	0.112575
670.07	1.72645	0.112836
670.77	1.7256	0.113032
671.46	1.72382	0.113166
672.15	1.72113	0.113239
672.85	1.71761	0.11326
673.54	1.71337	0.113235
674.24	1.70833	0.113159
674.95	1.70239	0.113024
675.66	1.69553	0.11283
676.37	1.68769	0.112572
677.1	1.67892	0.112254
677.81	1.66939	0.111888
678.51	1.65905	0.111472
679.2	1.64791	0.111007
679.88	1.63596	0.110491
680.55	1.62314	0.109921
681.21	1.60946	0.109296
681.87	1.59496	0.108619
682.52	1.57958	0.107887
683.17	1.56329	0.107097
683.82	1.54607	0.106248
684.47	1.52785	0.105334
685.11	1.50871	0.104361
685.76	1.48878	0.10334
686.41	1.46809	0.102273
687.06	1.4467	0.101165
687.72	1.42462	0.100017
688.38	1.40177	0.0988233
689.05	1.37823	0.0975889
689.72	1.35405	0.0963181
690.41	1.32911	0.0950022
691.1	1.30327	0.093631
691.78	1.27644	0.0921973
692.45	1.24844	0.0906887
693.11	1.21929	0.0891052
693.76	1.18903	0.0874514
694.42	1.15752	0.0857173
695.06	1.12468	0.0838951
695.71	1.09049	0.0819853
696.35	1.05494	0.0799867
696.99	1.01804	0.077899
697.63	0.979809	0.0757251
698.27	0.940126	0.0734552
698.91	0.898807	0.0710759
699.56	0.855814	0.0685844
700.21	0.811067	0.0659747
700.88	0.764632	0.0632519
701.58	0.716682	0.0604295
702.29	0.667229	0.0575086
702.99	0.616334	0.054494
703.7	0.564025	0.051388
704.4	0.510254	0.048187
705.1	0.455134	0.0448998
705.81	0.398778	0.0415351
706.51	0.341047	0.0380825
707.22	0.281761	0.0345287
707.92	0.220845	0.0308681
708.63	0.158133	0.0270882
709.33	0.0936892	0.0231942
710.03	0.0276916	0.0191998
710.74	-0.0399616	0.0150974
711.44	-0.109319	0.0108835
712.15	-0.180168	0.00657194
712.85	-0.252283	0.00217601
713.56	-0.325457	-0.00229065
714.26	-0.399372	-0.00680717
714.96	-0.473996	-0.0113726
715.66	-0.549392	-0.0159918
716.36	-0.625299	-0.0206487
717.04	-0.701511	-0.0253309
717.71	-0.777977	-0.0300346
718.38	-0.854601	-0.0347523
719.04	-0.931319	-0.0394801
719.7	-1.00813	-0.0442172
720.35	-1.08475	-0.0489463
721	-1.16084	-0.0536456
721.65	-1.23625	-0.058306
722.3	-1.31078	-0.0629136
722.95	-1.3845	-0.0674743
723.61	-1.45768	-0.0720061
724.27	-1.53029	-0.0765078
724.94	-1.60242	-0.0809854
725.62	-1.67403	-0.0854372
726.3	-1.74496	-0.0898519
726.97	-1.81535	-0.0942394
727.65	-1.88534	-0.0986094
728.32	-1.9546	-0.102941
728.99	-2.02273	-0.107209
729.66	-2.08952	-0.111399
730.31	-2.15457	-0.115486
730.96	-2.21792	-0.119473
731.61	-2.27982	-0.123379
732.26	-2.34001	-0.127184
732.9	-2.39829	-0.130879
733.55	-2.45478	-0.134469
734.2	-2.50947	-0.137953
734.85	-2.56248	-0.141339
735.51	-2.61402	-0.144639
736.17	-2.66392	-0.147842
736.84	-2.71192	-0.150933
737.52	-2.75811	-0.153915
738.2	-2.80247	-0.156786
738.88	-2.84497	-0.159546
739.56	-2.88567	-0.162199
740.24	-2.92449	-0.164741
740.91	-2.96134	-0.167165
741.59	-2.9963	-0.169478
742.27	-3.02948	-0.171683
742.95	-3.06091	-0.173784
743.63	-3.09064	-0.175785
744.31	-3.11839	-0.177666
744.99	-3.14369	-0.179399
745.67	-3.16635	-0.180973
746.35	-3.18604	-0.182366
747.03	-3.20263	-0.18357
747.71	-3.21615	-0.184588
748.38	-3.22622	-0.185397
749.04	-3.23252	-0.185975
749.71	-3.23514	-0.186329
750.38	-3.23423	-0.186468
751.05	-3.22981	-0.186392
751.72	-3.22206	-0.186111
752.39	-3.21067	-0.185608
753.06	-3.19516	-0.184852
753.74	-3.17555	-0.183843
754.41	-3.15176	-0.182578
755.07	-3.12391	-0.181063
755.73	-3.09239	-0.179325
756.37	-3.05725	-0.177367
757.01	-3.01858	-0.175196
757.65	-2.97655	-0.172823
758.28	-2.93122	-0.170252
758.91	-2.88289	-0.1675
759.53	-2.83188	-0.164591
760.16	-2.77796	-0.16151
760.79	-2.7208	-0.158235
761.42	-2.66032	-0.154762
762.06	-2.59631	-0.151078
762.7	-2.52898	-0.147197
763.35	-2.45883	-0.143151
764.01	-2.38576	-0.138934
764.67	-2.30975	-0.134546
765.35	-2.23081	-0.129988
766.01	-2.1487	-0.125243
766.67	-2.0635	-0.120315
767.31	-1.97525	-0.115208
767.95	-1.88382	-0.109914
768.58	-1.7891	-0.104425
769.21	-1.69099	-0.0987351
769.84	-1.58929	-0.0928313
770.46	-1.48426	-0.0867305
771.08	-1.3763	-0.0804594
771.7	-1.26552	-0.0740251
772.33	-1.15216	-0.0674446
772.96	-1.03621	-0.0607162
773.59	-0.917444	-0.0538249
774.22	-0.796076	-0.0467854
774.87	-0.672278	-0.0396088
775.52	-0.545663	-0.0322704
776.18	-0.415781	-0.0247421
776.84	-0.282309	-0.0170032
777.5	-0.144704	-0.00901881
778.15	-0.00295034	-0.000788685
778.81	0.142759	0.00767443
779.46	0.29287	0.0163988
780.12	0.447731	0.0254061
780.77	0.607322	0.0346952
781.42	0.771703	0.0442701
782.07	0.940893	0.0541319
782.72	1.11477	0.0642729
783.37	1.29377	0.0747204
784.02	1.47848	0.0855122
784.68	1.66904	0.0966564
785.33	1.86571	0.10817
785.98	2.06828	0.120039
786.64	2.27617	0.132226
787.3	2.48934	0.144728
787.95	2.70759	0.157531
788.61	2.93083	0.17063
789.28	3.15922	0.184034
789.94	3.39238	0.197719
790.6	3.62995	0.211661
791.25	3.87237	0.22589
791.91	4.12026	0.240442
792.55	4.37385	0.255335
793.19	4.6337	0.270602
793.82	4.89959	0.28623
794.44	5.17094	0.30218
795.06	5.44808	0.318475
795.67	5.73117	0.335123
796.28	6.01989	0.352097
796.88	6.31406	0.369377
797.48	6.61331	0.386933
798.09	6.9171	0.404722
798.69	7.22555	0.422747
799.3	7.53894	0.441026
799.91	7.85696	0.459527
800.52	8.17942	0.478232
801.14	8.5062	0.497131
801.76	8.83699	0.516203
802.4	9.17172	0.535442
803.03	9.51036	0.554845
803.66	9.85254	0.574379
804.3	10.1979	0.594006
804.92	10.546	0.613706
805.54	10.8968	0.633449
806.16	11.2503	0.653253
806.76	11.6072	0.67316
807.37	11.9676	0.693171
807.97	12.3317	0.713306
808.56	12.6996	0.733561
809.16	13.071	0.753912
809.76	13.4461	0.774384
810.36	13.8254	0.795
810.96	14.2084	0.81572
811.56	14.5945	0.836495
812.17	14.9834	0.857299
812.79	15.3745	0.878081
813.41	15.7681	0.898854
814.04	16.1647	0.919656
814.69	16.564	0.940456
815.34	16.9657	0.961236
815.99	17.37	0.982005
816.65	17.7767	1.00276
817.31	18.186	1.02351
817.98	18.5983	1.04428
818.65	19.0131	1.06505
819.3	19.4303	1.08579
819.96	19.8499	1.1065
820.61	20.2716	1.12719
821.26	20.6957	1.14784
821.9	21.1224	1.16848
822.54	21.5515	1.1891
823.18	21.9832	1.20969
823.82	22.4175	1.23026
824.46	22.8543	1.25082
825.09	23.2938	1.27137
825.72	23.7362	1.29192
826.34	24.181	1.31244
826.96	24.6278	1.33288
827.58	25.0762	1.3532
828.2	25.5259	1.37339
828.81	25.9767	1.39341
829.43	26.4287	1.41328
830.04	26.8816	1.43296
830.66	27.3349	1.4524
831.27	27.7888	1.47163
831.88	28.2434	1.49065
832.47	28.6987	1.50947
833.06	29.1549	1.5281
833.65	29.6117	1.54652
834.23	30.0684	1.56466
834.81	30.5252	1.58253
835.39	30.9819	1.60012
835.97	31.4387	1.61744
836.54	31.8965	1.63456
837.12	32.3554	1.65149
837.71	32.8158	1.66824
838.29	33.2778	1.68484
838.88	33.7417	1.70129
839.47	34.2079	1.71765
840.08	34.677	1.73394
840.7	35.1489	1.75016
841.32	35.623	1.76625
841.95	36.0994	1.78222
842.57	36.5777	1.79803
843.21	37.0584	1.81373
843.83	37.5425	1.82937
844.46	38.0298	1.84496
845.08	38.5205	1.86049
845.72	39.0146	1.87597
846.36	39.5116	1.89137
847.01	40.0117	1.90668
847.65	40.515	1.92192
848.29	41.0213	1.93708
848.92	41.5306	1.95214
849.55	42.0426	1.96709
850.17	42.5571	1.9819
850.79	43.0747	1.99662
851.41	43.596	2.0113
852.02	44.1213	2.02596
852.64	44.6513	2.04063
853.26	45.1859	2.05533
853.87	45.7246	2.07001
854.49	46.268	2.08471
855.11	46.8164	2.09945
855.73	47.3692	2.11419
856.35	47.9259	2.12887
856.97	48.486	2.14345
857.59	49.0487	2.15787
858.2	49.6141	2.17213
858.82	50.1827	2.18625
859.44	50.7538	2.20019
860.07	51.327	2.21391
860.7	51.9023	2.2274
861.34	52.4798	2.24066
861.95	53.0593	2.25369
862.54	53.6412	2.2665
863.12	54.2249	2.27906
863.69	54.8095	2.29127
864.25	55.3949	2.30313
864.81	55.9807	2.31461
865.37	56.5674	2.32573
865.92	57.1559	2.33658
866.48	57.7465	2.34717
867.04	58.3397	2.35752
867.62	58.9355	2.36766
868.2	59.5338	2.37756
868.8	60.1353	2.38728
869.42	60.7406	2.39687
870.02	61.3492	2.40627
870.62	61.9602	2.41541
871.2	62.5733	2.42426
871.78	63.1876	2.43275
872.35	63.8037	2.44092
872.92	64.4226	2.44884
873.49	65.0438	2.45648
874.06	65.6672	2.46381
874.64	66.2934	2.47091
875.23	66.9229	2.4778
875.83	67.5564	2.48455
876.45	68.1949	2.49124
877.07	68.8385	2.49788
877.7	69.4866	2.50444
878.31	70.1402	2.51096
878.93	70.7994	2.5175
879.54	71.4648	2.52408
880.13	72.1369	2.53074
880.71	72.8159	2.5375
881.27	73.502	2.54437
881.82	74.196	2.55141
882.36	74.8986	2.55871
882.91	75.6105	2.5663
883.46	76.3324	2.57425
884.02	77.0639	2.58253
884.59	77.8042	2.59106
885.17	78.5533	2.59983
885.74	79.3107	2.60881
886.29	80.0768	2.61801
886.87	80.852	2.62748
887.48	81.6359	2.63718
888.1	82.4281	2.64707
888.72	83.2295	2.65721
889.35	84.0412	2.66773
890	84.8638	2.67866
890.67	85.6986	2.69011
891.32	86.5453	2.70207
891.95	87.4031	2.71445
892.57	88.2727	2.72733
893.23	89.1547	2.74074
893.88	90.0489	2.75467
894.53	90.9556	2.76913
895.18	91.8747	2.7841
895.83	92.8056	2.79953
896.49	93.749	2.81548
897.13	94.7055	2.832
897.75	95.6753	2.84909
898.37	96.6585	2.86677
899.01	97.6551	2.88503
899.66	98.665	2.90385
900.28	99.6884	2.92325
900.89	100.725	2.94324
901.51	101.776	2.96381
902.12	102.84	2.98495
902.73	103.918	3.00665
903.35	105.009	3.02891
903.97	106.115	3.05178
904.61	107.235	3.07539
905.26	108.372	3.09976
905.94	109.526	3.12499
906.6	110.697	3.15111
907.24	111.885	3.1781
907.87	113.092	3.20604
908.48	114.317	3.23503
909.09	115.561	3.26503
909.7	116.824	3.29602
910.31	118.106	3.32802
910.94	119.406	3.36097
911.58	120.726	3.39496
912.23	122.066	3.4301
912.88	123.427	3.46638
913.53	124.809	3.50383
914.19	126.211	3.54241
914.86	127.633	3.58202
915.55	129.074	3.62263
916.19	130.534	3.66421
916.81	132.013	3.70672
917.42	133.51	3.75015
918.01	135.024	3.79441
918.6	136.555	3.83943
919.2	138.103	3.88525
919.89	139.67	3.93195
920.56	141.255	3.97955
921.18	142.859	4.0281
921.79	144.481	4.07755
922.4	146.12	4.12775
923.02	147.777	4.17873
923.63	149.451	4.23048
924.23	151.142	4.28301
924.83	152.851	4.33638
925.44	154.578	4.39059
926.06	156.323	4.44562
926.7	158.087	4.50152
927.36	159.869	4.55829
928.02	161.671	4.61597
928.66	163.493	4.67463
929.28	165.333	4.73419
929.89	167.192	4.79453
930.49	169.068	4.85561
931.08	170.961	4.91737
931.68	172.87	4.97982
932.29	174.798	5.04302
932.91	176.742	5.10691
933.55	178.704	5.17144
934.21	180.683	5.23671
934.9	182.681	5.30284
935.58	184.699	5.3699
936.25	186.738	5.43803
936.93	188.8	5.50724
937.63	190.882	5.57747
938.31	192.987	5.64883
938.99	195.114	5.72141
939.68	197.266	5.79519
940.37	199.441	5.8702
941.08	201.639	5.94645
941.8	203.861	6.02391
942.48	206.108	6.10268
943.13	208.381	6.18291
943.75	210.681	6.26465
944.36	213.008	6.34794
944.96	215.363	6.43275
945.55	217.743	6.5189
946.14	220.148	6.60639
946.74	222.578	6.69516
947.38	225.032	6.78518
948.05	227.511	6.8765
948.68	230.014	6.969
949.29	232.54	7.06261
949.9	235.09	7.15742
950.51	237.666	7.25359
951.12	240.268	7.35119
951.75	242.899	7.45035
952.4	245.557	7.55101
953.07	248.241	7.65302
953.79	250.952	7.75647
954.55	253.691	7.86138
955.32	256.455	7.96769
956.08	259.243	8.07539
956.85	262.054	8.18438
957.61	264.884	8.29455
958.37	267.735	8.40594
959.09	270.605	8.51863
959.8	273.494	8.63254
960.51	276.4	8.74767
961.23	279.322	8.86398
961.94	282.26	8.98137
962.65	285.213	9.09983
963.35	288.181	9.21936
964.05	291.162	9.33988
964.76	294.153	9.46131
965.46	297.153	9.5836
966.17	300.16	9.70667
966.88	303.176	9.83059
967.6	306.202	9.95549
968.3	309.238	10.0814
969	312.285	10.2084
969.7	315.343	10.3364
970.39	318.411	10.4655
971.09	321.489	10.5957
971.78	324.58	10.727
972.47	327.68	10.8594
973.16	330.786	10.9928
973.86	333.897	11.127
974.56	337.01	11.2621
975.27	340.124	11.398
975.97	343.243	11.5348
976.67	346.363	11.6726
977.36	349.484	11.8112
978.05	352.606	11.9506
978.74	355.73	12.0909
979.42	358.856	12.2321
980.11	361.986	12.3741
980.79	365.119	12.5171
981.48	368.252	12.6608
982.17	371.386	12.8053
982.86	374.521	12.9505
983.56	377.658	13.0965
984.26	380.796	13.2434
984.96	383.934	13.391
985.65	387.073	13.5395
986.33	390.213	13.6889
987.01	393.355	13.8391
987.69	396.499	13.9901
988.36	399.646	14.142
989.04	402.792	14.2947
989.72	405.936	14.4481
990.4	409.074	14.6021
991.08	412.205	14.7568
991.77	415.328	14.9119
992.46	418.443	15.0677
993.16	421.546	15.224
993.85	424.637	15.3806
994.54	427.714	15.5378
995.22	430.78	15.6954
995.9	433.834	15.8534
996.58	436.879	16.012
997.25	439.91	16.171
997.93	442.926	16.3303
998.6	445.926	16.4899
999.28	448.909	16.6498
999.97	451.876	16.8101
1000.7	454.832	16.9708
1001.3	457.775	17.1322
1002	460.708	17.2942
1002.7	463.632	17.4569
1003.4	466.546	17.6203
1004.1	469.455	17.7846
1004.8	472.359	17.9499
1005.4	475.259	18.116
1006.1	478.15	18.283
1006.8	481.033	18.4509
1007.5	483.906	18.6195
1008.2	486.77	18.789
1008.8	489.631	18.9596
1009.5	492.486	19.1313
1010.2	495.337	19.3041
1010.9	498.183	19.478
1011.6	501.022	19.6528
1012.3	503.856	19.8288
1012.9	506.683	20.0057
1013.6	509.504	20.1837
1014.3	512.317	20.3627
1014.9	515.122	20.5427
1015.6	517.918	20.7235
1016.3	520.705	20.9054
1017	523.488	21.0884
1017.7	526.268	21.2727
1018.5	529.047	21.4584
1019.3	531.825	21.6454
1020.1	534.6	21.8337
1020.9	537.373	22.0234
1021.7	540.147	22.2146
1022.5	542.918	22.4071
1023.3	545.683	22.6008
1024.1	548.439	22.7957
1024.9	551.182	22.9915
1025.6	553.911	23.1883
1026.4	556.629	23.3862
1027.2	559.331	23.5851
1028	562.015	23.7848
1028.8	564.682	23.9855
1029.6	567.331	24.187
1030.4	569.961	24.3894
1031.2	572.574	24.5927
1032	575.166	24.7968
1032.8	577.733	25.0015
1033.6	580.273	25.2069
1034.4	582.785	25.4128
1035.2	585.269	25.6193
1036	587.733	25.8266
1036.8	590.174	26.0349
1037.6	592.596	26.2441
1038.4	594.999	26.4544
1039.2	597.382	26.6657
1040.1	599.748	26.8781
1040.9	602.1	27.0917
1041.7	604.434	27.3066
1042.5	606.747	27.5224
1043.3	609.035	27.7392
1044.1	611.294	27.9567
1044.9	613.527	28.1751
1045.7	615.737	28.3945
1046.5	617.923	28.6149
1047.3	620.084	28.8363
1048.1	622.22	29.0587
1048.9	624.334	29.2819
1049.7	626.426	29.506
1050.5	628.502	29.7311
1051.3	630.559	29.957
1052.1	632.595	30.1837
1052.8	634.613	30.4111
1053.6	636.612	30.6391
1054.4	638.593	30.8679
1055.2	640.56	31.0974
1056	642.512	31.3278
1056.8	644.45	31.559
1057.6	646.377	31.7911
1058.4	648.294	32.0239
1059.2	650.203	32.2575
1060	652.106	32.492
1060.8	654.001	32.7272
1061.6	655.885	32.9631
1062.5	657.755	33.1997
1063.3	659.61	33.4368
1064.1	661.451	33.6744
1064.9	663.278	33.9126
1065.7	665.089	34.1514
1066.5	666.883	34.3907
1067.3	668.661	34.6305
1068.2	670.427	34.8707
1069	672.182	35.1114
1069.8	673.931	35.3525
1070.6	675.671	35.5939
1071.4	677.4	35.8357
1072.2	679.117	36.0777
1073	680.826	36.32
1073.8	682.524	36.5625
1074.6	684.213	36.8054
1075.4	685.894	37.0488
1076.2	687.563	37.2927
1077.1	689.223	37.5371
1077.9	690.876	37.782
1078.7	692.522	38.0274
1079.5	694.161	38.2735
1080.3	695.794	38.5202
1081.1	697.418	38.7675
1081.9	699.033	39.0153
1082.7	700.639	39.2635
1083.5	702.236	39.5122
1084.3	703.824	39.7616
1085.1	705.402	40.0117
1085.9	706.97	40.2623
1086.7	708.53	40.5136
1087.5	710.085	40.7654
1088.3	711.635	41.0177
1089.1	713.184	41.2704
1089.9	714.731	41.5235
1090.8	716.276	41.7771
1091.6	717.821	42.031
1092.4	719.368	42.2851
1093.3	720.917	42.5395
1094.1	722.466	42.7943
1094.9	724.017	43.0496
1095.8	725.568	43.3054
1096.6	727.121	43.5617
1097.4	728.679	43.8183
1098.3	730.243	44.0753
1099.1	731.812	44.3328
1100	733.384	44.5906
1100.8	734.956	44.8488
1101.6	736.525	45.1073
1102.5	738.088	45.366
1103.3	739.644	45.6249
1104.1	741.193	45.884
1105	742.731	46.1434
1105.8	744.254	46.4031
1106.6	745.764	46.6629
1107.5	747.262	46.9228
1108.3	748.748	47.1828
1109.1	750.225	47.443
1109.9	751.688	47.7031
1110.8	753.133	47.9633
1111.6	754.559	48.2234
1112.4	755.965	48.4834
1113.3	757.351	48.7434
1114.1	758.72	49.0034
1114.9	760.071	49.2634
1115.7	761.404	49.5234
1116.6	762.72	49.7835
1117.4	764.019	50.0436
1118.2	765.302	50.3037
1119.1	766.57	50.5639
1119.9	767.821	50.8241
1120.8	769.049	51.0843
1121.6	770.252	51.3444
1122.4	771.427	51.6044
1123.3	772.572	51.8642
1124.1	773.692	52.124
1125	774.783	52.3837
1125.8	775.842	52.6432
1126.7	776.873	52.9027
1127.5	777.879	53.1619
1128.3	778.863	53.421
1129.2	779.83	53.6798
1130	780.778	53.9384
1130.9	781.705	54.1967
1131.7	782.614	54.4547
1132.6	783.508	54.7124
1133.4	784.387	54.9696
1134.3	785.25	55.2266
1135.1	786.097	55.4832
1135.9	786.927	55.7395
1136.8	787.744	55.9955
1137.6	788.552	56.251
1138.5	789.352	56.5062
1139.3	790.146	56.7609
1140.1	790.931	57.0153
1141	791.701	57.2691
1141.8	792.454	57.5224
1142.6	793.186	57.7752
1143.5	793.898	58.0275
1144.3	794.589	58.2791
1145.1	795.256	58.5302
1145.9	795.893	58.7807
1146.8	796.505	59.0306
1147.6	797.096	59.2797
1148.5	797.669	59.5282
1149.3	798.228	59.7761
1150.1	798.769	60.0231
1151	799.287	60.2694
1151.8	799.783	60.515
1152.7	800.259	60.7597
1153.5	800.714	61.0036
1154.4	801.152	61.2467
1155.3	801.57	61.4892
1156.1	801.968	61.731
1157	802.349	61.9721
1157.8	802.715	62.2125
1158.7	803.067	62.4522
1159.5	803.409	62.6913
1160.4	803.737	62.9298
1161.2	804.049	63.1676
1162.1	804.344	63.4047
1163	804.62	63.6411
1163.8	804.878	63.8768
1164.7	805.122	64.1119
1165.5	805.349	64.3464
1166.3	805.559	64.5802
1167.2	805.753	64.8135
1168	805.934	65.046
1168.8	806.102	65.2778
1169.6	806.261	65.5089
1170.5	806.41	65.7392
1171.3	806.547	65.9688
1172.1	806.675	66.1975
1172.9	806.793	66.4254
1173.8	806.902	66.6526
1174.6	807.005	66.8789
1175.5	807.101	67.1046
1176.3	807.19	67.3295
1177.2	807.274	67.5538
1178	807.355	67.7773
1178.9	807.433	68.0001
1179.7	807.51	68.2222
1180.5	807.584	68.4435
1181.4	807.652	68.664
1182.2	807.712	68.8837
1183	807.761	69.1024
1183.9	807.8	69.3202
1184.7	807.829	69.5371
1185.5	807.845	69.753
1186.4	807.846	69.968
1187.2	807.833	70.1819
1188	807.808	70.3948
1188.9	807.772	70.6067
1189.7	807.726	70.8175
1190.6	807.668	71.0273
1191.4	807.594	71.2358
1192.3	807.504	71.4432
1193.1	807.398	71.6494
1193.9	807.277	71.8543
1194.8	807.144	72.0581
1195.6	807	72.2608
1196.5	806.844	72.4625
1197.4	806.679	72.663
1198.2	806.505	72.8624
1199.1	806.324	73.0608
1199.9	806.139	73.2582
1200.8	805.947	73.4544
1201.7	805.744	73.6496
1202.5	805.531	73.8435
1203.4	805.304	74.0362
1204.2	805.065	74.2277
1205	804.816	74.418
1205.9	804.558	74.6071
1206.7	804.288	74.7951
1207.5	804.008	74.9817
1208.4	803.718	75.1671
1209.2	803.421	75.3511
1210.1	803.118	75.5337
1210.9	802.809	75.7149
1211.8	802.491	75.8947
1212.6	802.166	76.0729
1213.4	801.835	76.2495
1214.3	801.497	76.4245
1215.1	801.154	76.598
1215.9	800.808	76.7699
1216.8	800.458	76.9403
1217.6	800.105	77.109
1218.5	799.751	77.2761
1219.3	799.396	77.4414
1220.1	799.042	77.6051
1221	798.688	77.767
1221.8	798.331	77.9271
1222.6	797.972	78.0854
1223.5	797.607	78.2419
1224.3	797.239	78.3965
1225.1	796.867	78.5492
1225.9	796.492	78.7001
1226.8	796.11	78.849
1227.6	795.725	78.996
1228.4	795.336	79.141
1229.2	794.946	79.2839
1230	794.555	79.4247
1230.8	794.164	79.5634
1231.7	793.769	79.6999
1232.5	793.372	79.8341
1233.3	792.973	79.9661
1234.1	792.573	80.0959
1235	792.172	80.2235
1235.8	791.772	80.3489
1236.6	791.373	80.4721
1237.4	790.975	80.5932
1238.3	790.579	80.7121
1239.1	790.187	80.8289
1239.9	789.8	80.9434
1240.6	789.417	81.0559
1241.4	789.037	81.1661
1242.2	788.66	81.274
1243	788.286	81.3797
1243.8	787.915	81.4831
1244.6	787.55	81.5843
1245.4	787.189	81.6833
1246.3	786.833	81.7801
1247.1	786.483	81.8746
1247.9	786.139	81.9668
1248.8	785.801	82.0565
1249.6	785.472	82.1438
1250.5	785.15	82.2286
1251.3	784.835	82.3109
1252.1	784.529	82.3905
1253	784.231	82.4675
1253.8	783.942	82.5419
1254.7	783.663	82.6136
1255.5	783.395	82.6828
1256.3	783.137	82.7494
1257.1	782.891	82.8134
1257.9	782.657	82.8748
1258.7	782.435	82.9334
1259.5	782.228	82.9893
1260.3	782.031	83.0426
1261.1	781.844	83.0934
1261.8	781.665	83.1419
1262.6	781.491	83.188
1263.4	781.321	83.2319
1264.2	781.157	83.2736
1265	780.995	83.3133
1265.8	780.833	83.3511
1266.6	780.673	83.3869
1267.4	780.513	83.4208
1268.2	780.355	83.4527
1269	780.2	83.4826
1269.9	780.044	83.5106
1270.7	779.884	83.5369
1271.5	779.721	83.5616
1272.2	779.551	83.5847
1273	779.377	83.6062
1273.8	779.201	83.6261
1274.6	779.022	83.6444
1275.3	778.841	83.6611
1276.1	778.658	83.6762
1276.8	778.472	83.6897
1277.6	778.285	83.7017
1278.4	778.099	83.7121
1279.2	777.91	83.721
1279.9	777.716	83.7286
1280.7	777.514	83.7351
1281.5	777.301	83.7405
1282.3	777.079	83.7451
1283.1	776.849	83.7485
1284	776.609	83.7511
1284.8	776.358	83.7529
1285.6	776.097	83.7538
1286.4	775.828	83.7537
1287.2	775.552	83.7525
1288	775.271	83.7501
1288.8	774.986	83.7464
1289.6	774.693	83.7416
1290.4	774.395	83.7356
1291.2	774.093	83.7283
1292	773.785	83.7197
1292.8	773.473	83.7099
1293.6	773.157	83.699
1294.4	772.836	83.6869
1295.2	772.511	83.6736
1296	772.185	83.6589
1296.8	771.858	83.6429
1297.6	771.531	83.6253
1298.5	771.202	83.6065
1299.3	770.868	83.5867
1300.1	770.526	83.566
1300.9	770.174	83.5445
1301.7	769.812	83.5224
1302.5	769.439	83.4996
1303.3	769.054	83.4764
1304	768.653	83.453
1304.8	768.238	83.4292
1305.5	767.811	83.4049
1306.3	767.373	83.3801
1307	766.927	83.3545
1307.7	766.47	83.3284
1308.5	765.999	83.3021
1309.2	765.514	83.2755
1309.9	765.014	83.2485
1310.7	764.502	83.2213
1311.4	763.98	83.1935
1312.1	763.449	83.1652
1312.9	762.909	83.1364
1313.6	762.361	83.1069
1314.4	761.808	83.0767
1315.1	761.252	83.0457
1315.9	760.694	83.0137
1316.7	760.135	82.9808
1317.4	759.571	82.9471
1318.2	759.002	82.9128
1318.9	758.426	82.878
1319.6	757.846	82.8424
1320.4	757.265	82.806
1321.1	756.682	82.7688
1321.8	756.098	82.7308
1322.5	755.513	82.6919
1323.2	754.927	82.6523
1323.9	754.34	82.6118
1324.7	753.755	82.5704
1325.4	753.17	82.5281
1326.1	752.584	82.485
1326.8	751.998	82.4411
1327.5	751.411	82.3965
1328.3	750.826	82.351
1329	750.244	82.3045
1329.8	749.667	82.257
1330.5	749.097	82.2083
1331.3	748.535	82.1584
1332.1	747.979	82.1074
1332.8	747.432	82.0551
1333.6	746.895	82.0016
1334.4	746.366	81.9468
1335.1	745.842	81.8913
1335.9	745.32	81.8349
1336.6	744.798	81.7782
1337.3	744.275	81.7209
1338.1	743.753	81.6632
1338.8	743.229	81.6051
1339.6	742.701	81.547
1340.3	742.17	81.4887
1341.1	741.635	81.4303
1341.8	741.097	81.3718
1342.5	740.559	81.313
1343.3	740.016	81.2542
1344.1	739.465	81.1957
1344.8	738.905	81.1375
1345.5	738.336	81.0799
1346.3	737.759	81.0226
1347	737.178	80.9654
1347.8	736.594	80.9083
1348.5	736.009	80.8512
1349.2	735.425	80.794
1350	734.839	80.7368
1350.7	734.256	80.6794
1351.4	733.679	80.6216
1352.1	733.105	80.5636
1352.8	732.53	80.5058
1353.5	731.952	80.4483
1354.2	731.368	80.3913
1354.8	730.78	80.3347
1355.5	730.192	80.2783
1356.2	729.604	80.2222
1356.9	729.012	80.1665
1357.6	728.42	80.1111
1358.2	727.826	80.056
1358.9	727.231	80.0009
1359.6	726.637	79.9456
1360.3	726.043	79.8902
1361	725.448	79.835
1361.7	724.85	79.7797
1362.4	724.25	79.7243
1363.1	723.648	79.6688
1363.8	723.048	79.6131
1364.5	722.449	79.557
1365.2	721.852	79.5006
1365.9	721.257	79.4438
1366.6	720.666	79.3864
1367.3	720.077	79.3283
1368	719.494	79.2694
1368.6	718.915	79.2098
1369.3	718.336	79.1497
1370	717.758	79.0894
1370.6	717.179	79.0288
1371.3	716.597	78.968
1372	716.016	78.9069
1372.6	715.434	78.8457
1373.3	714.848	78.7845
1374	714.261	78.7231
1374.6	713.672	78.6614
1375.3	713.082	78.5992
1376	712.493	78.5364
1376.7	711.903	78.4729
1377.4	711.311	78.4092
1378.1	710.715	78.345
1378.8	710.117	78.2804
1379.5	709.517	78.2153
1380.2	708.917	78.1497
1380.9	708.318	78.0836
1381.6	707.719	78.0171
1382.3	707.123	77.9502
1383	706.529	77.8827
1383.7	705.939	77.8147
1384.4	705.354	77.746
1385.1	704.774	77.6767
1385.8	704.197	77.6069
1386.5	703.623	77.5368
1387.2	703.05	77.4662
1387.9	702.481	77.3952
1388.6	701.917	77.3237
1389.3	701.358	77.2519
1390	700.804	77.1798
1390.7	700.255	77.1073
1391.4	699.71	77.0342
1392.1	699.17	76.9604
1392.8	698.637	76.8858
1393.5	698.108	76.8104
1394.2	697.584	76.7342
1395	697.065	76.6571
1395.7	696.549	76.5791
1396.4	696.039	76.5001
1397	695.535	76.4201
1397.7	695.039	76.3393
1398.4	694.55	76.2576
1399	694.069	76.1749
1399.7	693.596	76.0912
1400.3	693.132	76.0063
1401	692.676	75.9202
1401.6	692.228	75.8331
1402.2	691.787	75.7453
1402.9	691.351	75.6569
1403.5	690.919	75.568
1404.1	690.492	75.4788
1404.8	690.068	75.3892
1405.4	689.649	75.2995
1406	689.231	75.21
1406.7	688.816	75.1206
1407.3	688.404	75.0311
1408	687.994	74.9415
1408.6	687.587	74.8519
1409.3	687.181	74.7622
1409.9	686.775	74.6731
1410.6	686.369	74.5843
1411.3	685.961	74.496
1411.9	685.553	74.4083
1412.6	685.146	74.3209
1413.2	684.74	74.2339
1413.9	684.336	74.1473
1414.5	683.934	74.0612
1415.1	683.534	73.9754
1415.8	683.136	73.89
1416.5	682.743	73.8048
1417.3	682.352	73.7201
1418.1	681.962	73.6362
1418.8	681.572	73.5531
1419.6	681.18	73.4713
1420.4	680.787	73.3905
1421.2	680.394	73.3108
1421.9	680.001	73.2323
1422.7	679.607	73.1551
1423.5	679.212	73.079
1424.3	678.817	73.004
1425.1	678.423	72.9298
1425.8	678.03	72.8562
1426.6	677.639	72.7832
1427.4	677.249	72.7111
1428.1	676.859	72.6395
1428.9	676.47	72.5685
1429.7	676.082	72.498
1430.4	675.696	72.4281
1431.2	675.312	72.3587
1432	674.931	72.2899
1432.8	674.552	72.2216
1433.6	674.176	72.1535
1434.5	673.804	72.0856
1435.3	673.437	72.0177
1436.1	673.073	71.9501
1436.9	672.711	71.8831
1437.8	672.35	71.8169
1438.6	671.989	71.7515
1439.5	671.628	71.6872
1440.3	671.267	71.6239
1441.3	670.905	71.5618
1442.4	670.542	71.5013
1443.4	670.177	71.4421
1444.5	669.811	71.3839
1445.8	669.446	71.3267
1447.3	669.083	71.2702
1448.7	668.719	71.2145
1450.2	668.354	71.1602
1451.6	667.988	71.107
1453.1	667.621	71.055
1454.7	667.254	71.0041
1456.4	666.887	70.9541
1458	666.52	70.9051
1459.7	666.154	70.8571
1461.5	665.789	70.8098
1463.3	665.426	70.7633
1465.2	665.066	70.7173
1467	664.709	70.6716
1468.8	664.355	70.6265
1470.6	664.002	70.5821
1472.4	663.652	70.5384
1474.2	663.302	70.4956
1476	662.954	70.4536
1477.8	662.609	70.4121
1479.7	662.267	70.3712
1481.6	661.927	70.3309
1483.5	661.59	70.2913
1485.2	661.255	70.2521
1486.9	660.924	70.2133
1488.6	660.596	70.1749
1490.3	660.272	70.1367
1492	659.952	70.0989
1493.8	659.634	70.0615
1495.6	659.319	70.0243
1497.5	659.009	69.9874
1499.4	658.703	69.9506
1501.3	658.401	69.9138
1503.1	658.105	69.877
1504.9	657.815	69.84
1506.7	657.53	69.803
1508.5	657.25	69.7656
1510.3	656.978	69.7279
1512.1	656.711	69.6899
1513.8	656.449	69.652
1515.5	656.191	69.6143
1517.2	655.936	69.5769
1518.9	655.685	69.5399
1520.5	655.437	69.5031
1522.2	655.192	69.4669
1523.8	654.948	69.4313
1525.4	654.707	69.3963
1527.1	654.469	69.3618
1529	654.233	69.3277
1530.9	654	69.294
1532.7	653.769	69.2608
1534.6	653.54	69.2284
1536.4	653.311	69.1969
1538.2	653.083	69.1662
1539.9	652.856	69.1363
1541.7	652.631	69.1068
1543.5	652.409	69.0778
1545.3	652.19	69.0492
1547.2	651.974	69.0209
1549.1	651.761	68.9928
1550.9	651.552	68.9648
1552.8	651.349	68.9366
1554.6	651.149	68.9085
1556.4	650.953	68.8807
1558.3	650.759	68.8533
1560.1	650.567	68.8265
1561.9	650.376	68.8001
1563.7	650.189	68.774
1565.5	650.005	68.7481
1567.3	649.824	68.7227
1569	649.645	68.6975
1570.7	649.469	68.6727
1572.5	649.295	68.6482
1574.3	649.126	68.624
1576.2	648.959	68.6
1578.1	648.794	68.5764
1580	648.632	68.5534
1582	648.471	68.5308
1583.8	648.314	68.5087
1585.6	648.159	68.4868
1587.3	648.007	68.4652
1589.1	647.859	68.4439
1590.8	647.714	68.4227
1592.5	647.572	68.4018
1594.2	647.434	68.3811
1595.9	647.299	68.3606
1597.7	647.168	68.3402
1599.5	647.04	68.3202
1601.3	646.914	68.3006
1603.1	646.79	68.2815
1604.8	646.668	68.2629
1606.5	646.549	68.2448
1608.2	646.431	68.2271
1610	646.314	68.21
1611.7	646.2	68.1935
1613.5	646.086	68.1775
1615.3	645.975	68.162
1617.2	645.865	68.1471
1619.1	645.758	68.1327
1620.9	645.651	68.119
1622.7	645.545	68.106
1624.5	645.44	68.0938
1626.2	645.336	68.0822
1627.9	645.234	68.071
1629.7	645.134	68.0603
1631.4	645.035	68.0499
1633.1	644.94	68.0398
1634.8	644.846	68.03
1636.4	644.755	68.0204
1637.9	644.667	68.0108
1639.5	644.582	68.0012
1641.1	644.499	67.9919
1642.6	644.419	67.9827
1644.1	644.341	67.9738
1645.7	644.264	67.9651
1647.2	644.191	67.9564
1648.8	644.121	67.9476
1650.4	644.053	67.9388
1652	643.988	67.9299
1653.6	643.925	67.9212
1655.1	643.865	67.9125
1656.7	643.808	67.9038
1658.2	643.752	67.8953
1659.7	643.699	67.8869
1661.2	643.648	67.8786
1662.8	643.598	67.8706
1664.3	643.551	67.8627
1665.9	643.506	67.8548
1667.4	643.463	67.8469
1669	643.424	67.8387
1670.7	643.387	67.8305
1672.3	643.352	67.8222
1673.8	643.32	67.8138
1675.3	643.291	67.8052
1676.9	643.264	67.7965
1678.4	643.24	67.7878
1679.9	643.218	67.7792
1681.4	643.198	67.7707
1682.9	643.179	67.7624
1684.4	643.163	67.7541
1685.8	643.148	67.7461
1687.2	643.136	67.7382
1688.6	643.125	67.7305
1690	643.116	67.7231
1691.4	643.109	67.716
1692.7	643.103	67.7091
1694.1	643.099	67.7025
1695.4	643.096	67.6964
1696.8	643.094	67.6907
1698.1	643.093	67.6856
1699.5	643.093	67.6809
1700.8	643.094	67.6766
1702.2	643.097	67.6725
1703.6	643.102	67.6687
1705	643.108	67.6652
1706.5	643.116	67.6619
1708	643.126	67.6587
1709.4	643.138	67.6557
1710.9	643.151	67.6529
1712.3	643.166	67.6503
1713.8	643.183	67.6482
1715.2	643.2	67.6465
1716.7	643.219	67.6452
1718.1	643.24	67.6442
1719.5	643.261	67.6436
1720.9	643.285	67.6433
1722.3	643.309	67.6434
1723.7	643.335	67.6439
1725	643.362	67.6447
1726.3	643.39	67.6458
1727.7	643.42	67.6472
1729	643.45	67.649
1730.4	643.481	67.6511
1731.7	643.513	67.6536
1733.1	643.546	67.6565
1734.4	643.58	67.6597
1735.8	643.615	67.6631
1737.2	643.651	67.6669
1738.6	643.688	67.6708
1740	643.726	67.675
1741.3	643.765	67.6794
1742.7	643.805	67.684
1744	643.845	67.6888
1745.3	643.887	67.6939
1746.7	643.929	67.6993
1748	643.971	67.7053
1749.3	644.014	67.7116
1750.7	644.058	67.7183
1752	644.102	67.7256
1753.4	644.146	67.7333
1754.7	644.191	67.7416
1756.1	644.236	67.7503
1757.5	644.282	67.7594
1758.8	644.327	67.769
1760.1	644.373	67.779
1761.4	644.419	67.7895
1762.6	644.465	67.8006
1763.9	644.511	67.8122
1765.2	644.557	67.8243
1766.4	644.603	67.8367
1767.6	644.649	67.8495
1768.8	644.695	67.8626
1770	644.741	67.8758
1771.3	644.787	67.8892
1772.6	644.833	67.9027
1773.8	644.88	67.9162
1775	644.926	67.9297
1776.2	644.973	67.9433
1777.3	645.019	67.957
1778.5	645.066	67.9708
1779.7	645.112	67.9846
1780.8	645.158	67.9983
1782	645.204	68.0119
1783.2	645.249	68.0253
1784.4	645.295	68.0386
1785.6	645.34	68.0518
1786.9	645.385	68.0649
1788.2	645.43	68.0778
1789.4	645.474	68.0905
1790.7	645.518	68.1031
1791.9	645.561	68.1156
1793.1	645.603	68.128
1794.4	645.645	68.1401
1795.6	645.687	68.152
1796.9	645.727	68.1635
1798.2	645.768	68.1745
1799.5	645.807	68.1851
1800.9	645.846	68.1952
1802.3	645.884	68.2048
1803.6	645.922	68.2138
1804.9	645.959	68.2224
1806.1	645.994	68.2305
1807.2	646.029	68.2382
1808.3	646.063	68.2456
1809.4	646.096	68.2528
1810.5	646.127	68.2596
1811.6	646.158	68.2661
1812.6	646.187	68.2723
1813.7	646.215	68.2783
1814.7	646.241	68.284
1815.7	646.267	68.2894
1816.8	646.29	68.2945
1817.8	646.313	68.2993
1818.9	646.333	68.304
1820	646.352	68.3085
1821.1	646.369	68.3129
1822.2	646.385	68.3171
1823.4	646.398	68.3209
1824.6	646.41	68.3244
1825.8	646.421	68.3274
1826.9	646.429	68.3298
1828	646.435	68.3318
1829.1	646.44	68.3331
1830.1	646.443	68.3337
1831.2	646.444	68.3336
1832.2	646.443	68.3329
1833.3	646.439	68.3318
1834.3	646.434	68.3302
1835.4	646.426	68.3281
1836.5	646.416	68.3253
1837.5	646.404	68.3219
1838.6	646.389	68.3179
1839.7	646.372	68.3133
1840.9	646.354	68.3082
1842	646.333	68.3027
1843.1	646.311	68.2967
1844.3	646.288	68.2903
1845.4	646.263	68.2836
1846.5	646.237	68.2767
1847.6	646.21	68.2697
1848.7	646.181	68.2625
1849.8	646.152	68.2551
1851.1	646.122	68.2474
1852.4	646.091	68.2393
1853.8	646.059	68.231
1855.2	646.027	68.2226
1857.1	645.994	68.2141
1859.1	645.961	68.2054
1861.2	645.928	68.1967
1863.3	645.895	68.1878
1865.5	645.861	68.1789
1867.7	645.826	68.17
1870	645.791	68.1611
1872.4	645.756	68.1522
1875	645.72	68.1432
1877.5	645.683	68.1342
1880	645.646	68.1253
1882.6	645.609	68.1165
1885.1	645.572	68.1079
1887.6	645.536	68.0995
1890.2	645.501	68.0915
1892.7	645.465	68.0838
1895.4	645.43	68.0764
1898	645.396	68.0695
1900.7	645.363	68.063
1903.5	645.33	68.0567
1906.4	645.297	68.0505
1909.3	645.264	68.0444
1912.3	645.231	68.0384
1915.3	645.199	68.0325
1918.3	645.166	68.0266
1921.3	645.134	68.0206
1924.3	645.102	68.0146
1927.3	645.07	68.0086
1930.3	645.038	68.0026
1933.3	645.007	67.9967
1936.3	644.975	67.9908
1939.4	644.943	67.9847
1942.3	644.911	67.9785
1945.3	644.879	67.9721
1948.2	644.847	67.9655
1951.1	644.815	67.959
1953.8	644.783	67.9526
1956.4	644.753	67.9464
1958.9	644.724	67.9404
1961.3	644.695	67.9346
1963.7	644.668	67.9292
1966.1	644.643	67.9242
1969.1	644.62	67.9197
1972.1	644.597	67.9154
1975.1	644.576	67.9113
1978.1	644.556	67.9073
1981.1	644.537	67.9035
1984.1	644.52	67.9
1987.1	644.504	67.8968
1990.1	644.49	67.8939
1993.1	644.478	67.8913
1996.2	644.467	67.8888
1999.2	644.457	67.8866
2002.2	644.448	67.8846
2005.2	644.44	67.8828
2008.2	644.432	67.8811
[truncated: 1,000 more rows]
