# Supplementary material for: Numerical Simulation of Dry Granular Flow Impacting a Rigid Wall Using the Discrete Element Method
Source: PLoS One. 2016 Aug 11;11(8):e0160756. doi: 10.1371/journal.pone.0160756 (PMC4981468; doi:10.1371/journal.pone.0160756)
Supplement: S4 File — (XLS) [file pone.0160756.s004.xls]

## Sheet: Sheet1
0.0087511	0.470816	0.1185	-0.0184612	-0.00472145	-0.000259153	0.000398228
0.034174	0.469633	0.118645	-0.018538	-0.00474168	-0.000255761	0.000402872
0.075587	0.468423	0.118788	-0.0186148	-0.00476188	-0.000252332	0.000407551
0.14304	0.467186	0.118928	-0.0186917	-0.00478206	-0.000248865	0.000412265
0.25292	0.465923	0.119065	-0.0187686	-0.0048022	-0.00024536	0.000417015
0.4319	0.464634	0.119199	-0.0188456	-0.00482232	-0.000241817	0.000421799
0.72344	0.463318	0.119331	-0.0189226	-0.00484241	-0.000238236	0.000426618
1.1983	0.461974	0.11946	-0.0189997	-0.00486248	-0.000234617	0.000431473
1.9719	0.460604	0.119586	-0.0190769	-0.00488251	-0.000230959	0.000436363
3.0305	0.459207	0.119709	-0.0191541	-0.00490252	-0.000227262	0.00044129
4.0971	0.457782	0.119829	-0.0192313	-0.0049225	-0.000223526	0.000446252
5.1637	0.45633	0.119947	-0.0193086	-0.00494244	-0.000219752	0.00045125
6.2303	0.45485	0.120062	-0.0193859	-0.00496236	-0.000215937	0.000456284
7.2969	0.453342	0.120173	-0.0194633	-0.00498224	-0.000212084	0.000461355
8.3635	0.451806	0.120282	-0.0195408	-0.00500209	-0.00020819	0.000466462
9.43	0.450243	0.120388	-0.0196182	-0.00502191	-0.000204257	0.000471606
10.497	0.44865	0.120491	-0.0196957	-0.0050417	-0.000200283	0.000476787
11.563	0.44703	0.120591	-0.0197733	-0.00506145	-0.00019627	0.000482005
12.63	0.445381	0.120688	-0.0198509	-0.00508117	-0.000192215	0.00048726
13.696	0.443703	0.120782	-0.0199286	-0.00510085	-0.000188121	0.000492553
14.763	0.441996	0.120873	-0.0200063	-0.0051205	-0.000183986	0.000497882
15.83	0.440261	0.120961	-0.020084	-0.00514012	-0.00017981	0.000503249
16.896	0.438496	0.121046	-0.0201618	-0.0051597	-0.000175592	0.000508654
17.963	0.436703	0.121128	-0.0202396	-0.00517924	-0.000171334	0.000514096
19.029	0.43488	0.121206	-0.0203174	-0.00519875	-0.000167035	0.000519576
20.096	0.433028	0.121282	-0.0203953	-0.00521821	-0.000162694	0.000525093
21.163	0.431146	0.121354	-0.0204732	-0.00523764	-0.000158312	0.000530649
22.229	0.429235	0.121423	-0.0205511	-0.00525704	-0.000153889	0.000536242
23.296	0.427294	0.12149	-0.0206291	-0.00527639	-0.000149424	0.000541873
24.362	0.425324	0.121553	-0.0207071	-0.00529571	-0.000144918	0.000547542
25.429	0.423325	0.121613	-0.0207851	-0.00531499	-0.00014037	0.000553248
26.495	0.421296	0.121669	-0.0208632	-0.00533423	-0.000135781	0.000558993
27.562	0.419237	0.121723	-0.0209413	-0.00535343	-0.000131151	0.000564775
28.629	0.417149	0.121773	-0.0210194	-0.0053726	-0.000126478	0.000570595
29.695	0.41503	0.12182	-0.0210976	-0.00539172	-0.000121765	0.000576453
30.762	0.412882	0.121864	-0.0211757	-0.0054108	-0.000117009	0.000582349
31.828	0.410704	0.121905	-0.0212539	-0.00542984	-0.000112211	0.000588283
32.895	0.408495	0.121943	-0.0213322	-0.00544884	-0.000107371	0.000594255
33.962	0.406257	0.121977	-0.0214104	-0.0054678	-0.00010249	0.000600266
35.028	0.403987	0.122008	-0.0214886	-0.00548672	-9.75657e-05	0.000606314
36.095	0.401688	0.122035	-0.0215669	-0.00550559	-9.25995e-05	0.000612401
37.161	0.399358	0.12206	-0.0216452	-0.00552441	-8.75912e-05	0.000618526
38.228	0.396997	0.122081	-0.0217235	-0.00554319	-8.25406e-05	0.00062469
39.295	0.394606	0.122098	-0.0218018	-0.00556193	-7.74478e-05	0.000630891
40.361	0.392185	0.122113	-0.0218801	-0.00558062	-7.23127e-05	0.00063713
41.428	0.389732	0.122124	-0.0219584	-0.00559927	-6.71353e-05	0.000643408
42.494	0.387249	0.122131	-0.0220368	-0.00561786	-6.19154e-05	0.000649724
43.561	0.384734	0.122135	-0.0221151	-0.00563641	-5.66532e-05	0.000656078
44.627	0.382189	0.122136	-0.0221934	-0.00565491	-5.13486e-05	0.00066247
45.694	0.379613	0.122133	-0.0222717	-0.00567335	-4.60016e-05	0.0006689
46.761	0.377006	0.122127	-0.02235	-0.00569175	-4.06121e-05	0.000675368
47.827	0.374367	0.122118	-0.0224283	-0.0057101	-3.51803e-05	0.000681874
48.894	0.371698	0.122105	-0.0225066	-0.0057284	-2.97061e-05	0.000688418
49.96	0.368997	0.122088	-0.0225849	-0.00574665	-2.41896e-05	0.000695
51.027	0.366266	0.122068	-0.0226632	-0.00576485	-1.8631e-05	0.00070162
52.094	0.363504	0.122045	-0.0227415	-0.005783	-1.30302e-05	0.000708277
53.16	0.36071	0.122018	-0.0228198	-0.00580109	-7.38728e-06	0.000714972
54.227	0.357886	0.121988	-0.022898	-0.00581914	-1.70218e-06	0.000721704
55.293	0.35503	0.121954	-0.0229762	-0.00583713	4.02509e-06	0.000728474
56.36	0.352144	0.121917	-0.0230545	-0.00585507	9.79447e-06	0.000735281
57.427	0.349226	0.121876	-0.0231327	-0.00587296	1.56059e-05	0.000742126
58.493	0.346277	0.121831	-0.0232108	-0.0058908	2.14595e-05	0.000749008
59.56	0.343297	0.121784	-0.023289	-0.00590858	2.73552e-05	0.000755928
60.626	0.340286	0.121732	-0.0233671	-0.00592631	3.32928e-05	0.000762885
61.693	0.337243	0.121677	-0.0234453	-0.00594399	3.92724e-05	0.000769878
62.759	0.33417	0.121619	-0.0235234	-0.00596161	4.52938e-05	0.000776909
63.826	0.331066	0.121557	-0.0236014	-0.00597919	5.13568e-05	0.000783977
64.893	0.32793	0.121492	-0.0236795	-0.0059967	5.74613e-05	0.000791081
65.959	0.324764	0.121423	-0.0237575	-0.00601417	6.36073e-05	0.000798222
67.026	0.321567	0.12135	-0.0238355	-0.00603158	6.97946e-05	0.000805398
68.092	0.318339	0.121274	-0.0239134	-0.00604893	7.6023e-05	0.000812612
69.159	0.31508	0.121195	-0.0239913	-0.00606623	8.22923e-05	0.00081986
70.226	0.311791	0.121112	-0.0240692	-0.00608348	8.86024e-05	0.000827145
71.292	0.308471	0.121025	-0.024147	-0.00610067	9.49532e-05	0.000834465
72.359	0.305121	0.120935	-0.0242248	-0.0061178	0.000101344	0.000841821
73.425	0.30174	0.120842	-0.0243026	-0.00613489	0.000107776	0.000849212
74.492	0.298329	0.120745	-0.0243803	-0.00615191	0.000114248	0.000856637
75.559	0.294888	0.120644	-0.0244579	-0.00616888	0.000120759	0.000864097
76.625	0.291417	0.12054	-0.0245356	-0.0061858	0.00012731	0.000871592
77.692	0.287916	0.120433	-0.0246131	-0.00620266	0.0001339	0.00087912
78.758	0.284386	0.120322	-0.0246906	-0.00621947	0.00014053	0.000886683
79.825	0.280825	0.120207	-0.0247681	-0.00623623	0.000147198	0.000894279
80.891	0.277235	0.120089	-0.0248455	-0.00625293	0.000153906	0.000901908
81.958	0.273615	0.119968	-0.0249229	-0.00626957	0.000160652	0.000909571
83.025	0.269966	0.119843	-0.0250002	-0.00628616	0.000167437	0.000917268
84.091	0.266287	0.119714	-0.0250775	-0.00630269	0.000174261	0.000924997
85.158	0.262578	0.119583	-0.0251546	-0.00631916	0.000181123	0.00093276
86.224	0.25884	0.119447	-0.0252318	-0.00633558	0.000188024	0.000940555
87.291	0.255072	0.119308	-0.0253088	-0.00635194	0.000194963	0.000948383
88.358	0.251274	0.119166	-0.0253858	-0.00636824	0.000201941	0.000956244
89.424	0.247447	0.11902	-0.0254627	-0.00638449	0.000208956	0.000964137
90.491	0.243591	0.11887	-0.0255396	-0.00640067	0.000216009	0.000972062
91.557	0.239705	0.118717	-0.0256163	-0.0064168	0.000223101	0.00098002
92.624	0.23579	0.118561	-0.025693	-0.00643286	0.00023023	0.000988009
93.691	0.231845	0.118401	-0.0257696	-0.00644886	0.000237396	0.00099603
94.757	0.22787	0.118237	-0.0258462	-0.00646481	0.000244601	0.00100408
95.824	0.223866	0.11807	-0.0259226	-0.00648069	0.000251843	0.00101217
96.89	0.219833	0.117899	-0.0259989	-0.0064965	0.000259122	0.00102028
97.957	0.21577	0.117724	-0.0260752	-0.00651225	0.000266439	0.00102843
99.023	0.211677	0.117546	-0.0261513	-0.00652794	0.000273793	0.00103661
100.09	0.207555	0.117365	-0.0262274	-0.00654357	0.000281184	0.00104482
101.16	0.203404	0.117179	-0.0263034	-0.00655913	0.000288612	0.00105306
102.22	0.199224	0.11699	-0.0263792	-0.00657463	0.000296077	0.00106133
103.29	0.195015	0.116798	-0.026455	-0.00659006	0.000303578	0.00106963
104.36	0.190776	0.116602	-0.0265306	-0.00660543	0.000311116	0.00107796
105.42	0.186508	0.116402	-0.0266062	-0.00662073	0.00031869	0.00108632
106.49	0.182211	0.116199	-0.0266816	-0.00663596	0.000326301	0.00109471
107.56	0.177884	0.115992	-0.026757	-0.00665113	0.000333948	0.00110313
108.62	0.173528	0.115781	-0.0268322	-0.00666623	0.000341632	0.00111158
109.69	0.169143	0.115567	-0.0269072	-0.00668126	0.000349352	0.00112007
110.76	0.164729	0.115348	-0.0269822	-0.00669622	0.000357108	0.00112858
111.82	0.160284	0.115127	-0.0270571	-0.00671111	0.0003649	0.00113712
112.89	0.155811	0.114901	-0.0271318	-0.00672593	0.000372729	0.00114569
113.96	0.151308	0.114672	-0.0272064	-0.00674068	0.000380593	0.00115428
115.02	0.146777	0.114439	-0.0272808	-0.00675536	0.000388493	0.00116291
116.09	0.142216	0.114202	-0.0273551	-0.00676997	0.000396428	0.00117157
117.16	0.137626	0.113962	-0.0274293	-0.00678451	0.000404399	0.00118025
118.22	0.133006	0.113718	-0.0275034	-0.00679897	0.000412405	0.00118896
119.29	0.128358	0.11347	-0.0275773	-0.00681336	0.000420446	0.00119771
120.36	0.123682	0.113219	-0.027651	-0.00682767	0.000428521	0.00120647
121.42	0.118976	0.112963	-0.0277246	-0.00684191	0.000436631	0.00121527
122.49	0.114242	0.112704	-0.0277981	-0.00685607	0.000444775	0.00122409
123.56	0.109479	0.112442	-0.0278713	-0.00687016	0.000452952	0.00123294
124.62	0.104688	0.112175	-0.0279445	-0.00688418	0.000461164	0.00124182
125.69	0.0998693	0.111905	-0.0280174	-0.00689812	0.000469408	0.00125072
126.75	0.0950224	0.111631	-0.0280902	-0.00691198	0.000477685	0.00125964
127.8	0.0901479	0.111354	-0.0281629	-0.00692577	0.000485994	0.0012686
128.87	0.0852459	0.111073	-0.0282353	-0.00693948	0.000494335	0.00127757
129.94	0.0803165	0.110788	-0.0283076	-0.00695312	0.000502707	0.00128657
130.99	0.0753599	0.110499	-0.0283797	-0.00696668	0.000511112	0.0012956
132	0.070376	0.110207	-0.0284517	-0.00698016	0.000519547	0.00130464
133.05	0.0653651	0.109911	-0.0285234	-0.00699356	0.000528013	0.00131372
134.11	0.0603271	0.109611	-0.028595	-0.00700689	0.00053651	0.00132281
135.16	0.055262	0.109308	-0.0286663	-0.00702013	0.000545038	0.00133193
136.2	0.05017	0.109001	-0.0287375	-0.0070333	0.000553596	0.00134107
137.24	0.045051	0.10869	-0.0288084	-0.00704638	0.000562184	0.00135023
138.27	0.0399052	0.108376	-0.0288792	-0.00705938	0.000570802	0.00135941
139.29	0.0347329	0.108058	-0.0289498	-0.0070723	0.00057945	0.00136862
140.29	0.0295343	0.107736	-0.0290201	-0.00708514	0.000588126	0.00137785
141.22	0.0243093	0.107411	-0.0290902	-0.0070979	0.000596832	0.0013871
142.18	0.0190581	0.107081	-0.0291601	-0.00711057	0.000605566	0.00139636
143.14	0.0137808	0.106748	-0.0292298	-0.00712315	0.000614328	0.00140565
144.12	0.00847754	0.106412	-0.0292993	-0.00713565	0.000623118	0.00141496
145.11	0.00314846	0.106071	-0.0293685	-0.00714807	0.000631936	0.00142429
146.1	-0.0022063	0.105727	-0.0294375	-0.00716039	0.000640781	0.00143364
147.09	-0.0075867	0.10538	-0.0295062	-0.00717263	0.000649653	0.001443
148.07	-0.0129926	0.105028	-0.0295747	-0.00718479	0.000658552	0.00145239
149.05	-0.0184239	0.104673	-0.029643	-0.00719685	0.000667477	0.00146179
150.02	-0.0238803	0.104314	-0.029711	-0.00720883	0.000676429	0.00147121
150.94	-0.0293617	0.103951	-0.0297788	-0.00722071	0.000685406	0.00148064
151.87	-0.0348679	0.103585	-0.0298463	-0.00723251	0.000694408	0.0014901
152.79	-0.0403986	0.103215	-0.0299135	-0.00724422	0.000703436	0.00149957
153.69	-0.045954	0.102842	-0.0299805	-0.00725584	0.000712488	0.00150905
154.57	-0.0515338	0.102464	-0.0300472	-0.00726737	0.000721566	0.00151856
155.44	-0.057138	0.102083	-0.0301137	-0.00727881	0.000730667	0.00152807
156.29	-0.0627664	0.101699	-0.0301798	-0.00729016	0.000739792	0.00153761
157.14	-0.0684191	0.10131	-0.0302457	-0.00730142	0.000748942	0.00154715
157.98	-0.074096	0.100918	-0.0303114	-0.00731259	0.000758115	0.00155672
158.82	-0.079797	0.100522	-0.0303767	-0.00732366	0.000767312	0.0015663
159.66	-0.0855221	0.100123	-0.0304418	-0.00733464	0.000776533	0.00157589
160.51	-0.091271	0.0997198	-0.0305066	-0.00734553	0.000785776	0.00158549
161.38	-0.0970436	0.0993129	-0.0305711	-0.00735632	0.000795042	0.00159511
162.24	-0.10284	0.0989024	-0.0306353	-0.00736702	0.000804331	0.00160475
163.09	-0.108659	0.0984882	-0.0306992	-0.00737763	0.000813641	0.00161439
163.93	-0.114502	0.0980703	-0.0307628	-0.00738815	0.000822973	0.00162405
164.76	-0.120367	0.0976488	-0.0308261	-0.00739856	0.000832327	0.00163372
165.58	-0.126256	0.0972236	-0.0308891	-0.00740889	0.000841701	0.0016434
166.4	-0.132167	0.0967947	-0.0309518	-0.00741912	0.000851096	0.00165309
167.21	-0.1381	0.0963623	-0.0310141	-0.00742925	0.000860511	0.0016628
168.02	-0.144056	0.0959262	-0.0310762	-0.00743929	0.000869946	0.00167251
168.82	-0.150034	0.0954865	-0.0311379	-0.00744924	0.000879401	0.00168223
169.63	-0.156034	0.0950431	-0.0311994	-0.00745909	0.000888875	0.00169197
170.43	-0.162055	0.0945962	-0.0312605	-0.00746884	0.000898368	0.00170171
171.24	-0.168098	0.0941457	-0.0313213	-0.0074785	0.000907879	0.00171146
172.05	-0.174162	0.0936917	-0.0313817	-0.00748806	0.000917409	0.00172122
172.86	-0.180248	0.0932341	-0.0314418	-0.00749753	0.000926956	0.00173099
173.69	-0.186354	0.0927729	-0.0315016	-0.00750691	0.00093652	0.00174077
174.51	-0.192481	0.0923082	-0.0315611	-0.00751619	0.000946102	0.00175055
175.33	-0.198628	0.09184	-0.0316202	-0.00752537	0.0009557	0.00176034
176.16	-0.204796	0.0913682	-0.031679	-0.00753446	0.000965314	0.00177013
176.98	-0.210985	0.0908929	-0.0317374	-0.00754345	0.000974945	0.00177994
177.78	-0.217193	0.0904141	-0.0317955	-0.00755235	0.000984592	0.00178974
178.57	-0.223422	0.0899317	-0.0318533	-0.00756114	0.000994255	0.00179956
179.36	-0.229671	0.0894458	-0.0319106	-0.00756984	0.00100393	0.00180938
180.15	-0.23594	0.0889563	-0.0319677	-0.00757845	0.00101363	0.0018192
180.93	-0.242229	0.0884634	-0.0320243	-0.00758695	0.00102333	0.00182903
181.72	-0.248537	0.0879669	-0.0320806	-0.00759535	0.00103306	0.00183886
182.52	-0.254864	0.0874669	-0.0321366	-0.00760366	0.00104279	0.0018487
183.32	-0.261211	0.0869633	-0.0321921	-0.00761186	0.00105254	0.00185854
184.13	-0.267577	0.0864563	-0.0322473	-0.00761997	0.00106231	0.00186838
184.93	-0.273962	0.0859457	-0.0323021	-0.00762797	0.00107208	0.00187823
185.74	-0.280366	0.0854316	-0.0323565	-0.00763588	0.00108187	0.00188807
186.55	-0.286789	0.084914	-0.0324105	-0.00764368	0.00109168	0.00189792
187.33	-0.293231	0.0843928	-0.0324642	-0.00765138	0.00110149	0.00190777
188.11	-0.299691	0.0838682	-0.0325174	-0.00765897	0.00111132	0.00191763
188.89	-0.306169	0.08334	-0.0325703	-0.00766647	0.00112116	0.00192748
189.67	-0.312666	0.0828083	-0.0326227	-0.00767386	0.00113101	0.00193734
190.45	-0.319181	0.0822732	-0.0326748	-0.00768114	0.00114087	0.00194719
191.24	-0.325714	0.0817345	-0.0327264	-0.00768833	0.00115074	0.00195704
192	-0.332265	0.0811924	-0.0327777	-0.00769541	0.00116063	0.0019669
192.77	-0.338833	0.0806467	-0.0328285	-0.00770239	0.00117052	0.00197675
193.52	-0.345419	0.0800976	-0.0328789	-0.00770927	0.00118042	0.00198661
194.27	-0.352023	0.079545	-0.0329289	-0.00771604	0.00119034	0.00199646
195.01	-0.358644	0.0789889	-0.0329785	-0.0077227	0.00120026	0.00200631
195.76	-0.365283	0.0784293	-0.0330277	-0.00772926	0.00121019	0.00201616
196.5	-0.371939	0.0778661	-0.0330764	-0.00773572	0.00122014	0.002026
197.25	-0.378612	0.0772995	-0.0331247	-0.00774207	0.00123009	0.00203585
198	-0.385303	0.0767294	-0.0331726	-0.00774831	0.00124005	0.00204569
198.75	-0.39201	0.0761558	-0.0332201	-0.00775445	0.00125002	0.00205553
199.52	-0.398735	0.0755787	-0.0332671	-0.00776048	0.00126	0.00206536
200.28	-0.405476	0.0749981	-0.0333137	-0.0077664	0.00126998	0.0020752
201.05	-0.412233	0.0744141	-0.0333598	-0.00777222	0.00127998	0.00208502
201.82	-0.419007	0.0738265	-0.0334055	-0.00777792	0.00128998	0.00209485
202.57	-0.425797	0.0732356	-0.0334507	-0.00778352	0.00129998	0.00210467
203.31	-0.432602	0.0726412	-0.0334955	-0.00778902	0.00131	0.00211448
204.04	-0.439423	0.0720433	-0.0335398	-0.0077944	0.00132001	0.00212429
204.76	-0.446259	0.071442	-0.0335837	-0.00779968	0.00133004	0.00213409
205.49	-0.453111	0.0708373	-0.0336271	-0.00780484	0.00134007	0.00214388
206.21	-0.459977	0.0702292	-0.03367	-0.0078099	0.0013501	0.00215366
206.92	-0.466858	0.0696178	-0.0337125	-0.00781485	0.00136014	0.00216344
207.64	-0.473753	0.069003	-0.0337544	-0.00781969	0.00137018	0.00217321
208.36	-0.480662	0.0683848	-0.0337959	-0.00782442	0.00138022	0.00218297
209.09	-0.487585	0.0677633	-0.0338369	-0.00782905	0.00139027	0.00219272
209.82	-0.494521	0.0671386	-0.0338775	-0.00783356	0.00140031	0.00220245
210.57	-0.501469	0.0665105	-0.0339175	-0.00783797	0.00141036	0.00221218
211.31	-0.508431	0.0658792	-0.033957	-0.00784226	0.00142041	0.0022219
212.06	-0.515405	0.0652447	-0.0339961	-0.00784645	0.00143046	0.0022316
212.8	-0.522391	0.0646069	-0.0340346	-0.00785053	0.00144051	0.00224129
213.53	-0.529389	0.0639659	-0.0340726	-0.0078545	0.00145055	0.00225096
214.26	-0.536399	0.0633217	-0.0341101	-0.00785835	0.0014606	0.00226062
214.99	-0.54342	0.0626742	-0.0341471	-0.0078621	0.00147064	0.00227027
215.71	-0.550453	0.0620236	-0.0341836	-0.00786574	0.00148068	0.0022799
216.43	-0.557496	0.0613697	-0.0342195	-0.00786926	0.00149072	0.00228952
217.12	-0.56455	0.0607128	-0.0342549	-0.00787267	0.00150076	0.00229912
217.8	-0.571614	0.0600527	-0.0342898	-0.00787597	0.00151078	0.0023087
218.49	-0.578688	0.0593895	-0.0343241	-0.00787916	0.00152081	0.00231826
219.18	-0.585771	0.0587232	-0.0343579	-0.00788224	0.00153083	0.0023278
219.87	-0.592863	0.0580538	-0.0343911	-0.0078852	0.00154084	0.00233733
220.56	-0.599963	0.0573814	-0.0344238	-0.00788805	0.00155084	0.00234683
221.24	-0.607072	0.0567059	-0.0344559	-0.00789079	0.00156084	0.00235631
221.92	-0.614189	0.0560275	-0.0344874	-0.00789341	0.00157083	0.00236577
222.62	-0.621314	0.055346	-0.0345184	-0.00789592	0.00158081	0.00237521
223.35	-0.628446	0.0546615	-0.0345488	-0.00789832	0.00159077	0.00238463
224.07	-0.635585	0.0539741	-0.0345786	-0.0079006	0.00160073	0.00239402
224.79	-0.64273	0.0532838	-0.0346078	-0.00790277	0.00161068	0.00240338
225.48	-0.649882	0.0525906	-0.0346364	-0.00790483	0.00162062	0.00241273
226.16	-0.65704	0.0518944	-0.0346645	-0.00790677	0.00163054	0.00242204
226.82	-0.664204	0.0511955	-0.0346919	-0.00790859	0.00164045	0.00243133
227.49	-0.671372	0.0504936	-0.0347187	-0.00791031	0.00165035	0.00244059
228.14	-0.678546	0.0497889	-0.034745	-0.0079119	0.00166023	0.00244982
228.79	-0.685725	0.0490814	-0.0347706	-0.00791339	0.0016701	0.00245903
229.44	-0.692908	0.0483711	-0.0347956	-0.00791476	0.00167996	0.00246821
230.09	-0.700096	0.0476581	-0.03482	-0.00791602	0.00168979	0.00247735
230.74	-0.707287	0.0469422	-0.0348437	-0.00791716	0.00169962	0.00248647
231.41	-0.714482	0.0462235	-0.0348669	-0.00791818	0.00170942	0.00249556
232.09	-0.721681	0.0455022	-0.0348894	-0.0079191	0.00171921	0.00250461
232.77	-0.728883	0.044778	-0.0349113	-0.00791989	0.00172899	0.00251364
233.44	-0.736088	0.0440512	-0.0349325	-0.00792058	0.00173874	0.00252263
234.11	-0.743295	0.0433218	-0.0349531	-0.00792114	0.00174848	0.00253159
234.76	-0.750504	0.0425896	-0.0349731	-0.0079216	0.00175819	0.00254051
235.41	-0.757715	0.0418549	-0.0349924	-0.00792194	0.00176789	0.0025494
236.05	-0.764927	0.0411175	-0.0350111	-0.00792216	0.00177757	0.00255826
236.69	-0.772139	0.0403776	-0.0350291	-0.00792227	0.00178722	0.00256707
237.34	-0.779352	0.0396352	-0.0350464	-0.00792227	0.00179685	0.00257585
237.99	-0.786564	0.0388903	-0.035063	-0.00792215	0.00180646	0.00258459
238.65	-0.793776	0.0381429	-0.035079	-0.00792192	0.00181604	0.0025933
239.3	-0.800987	0.037393	-0.0350943	-0.00792157	0.0018256	0.00260196
239.96	-0.808197	0.0366407	-0.035109	-0.00792111	0.00183513	0.00261059
240.61	-0.815405	0.035886	-0.0351229	-0.00792053	0.00184464	0.00261917
241.26	-0.822611	0.0351289	-0.0351361	-0.00791984	0.00185412	0.00262771
241.91	-0.829814	0.0343695	-0.0351487	-0.00791904	0.00186357	0.0026362
242.57	-0.837014	0.0336078	-0.0351605	-0.00791812	0.00187299	0.00264466
243.24	-0.844211	0.0328438	-0.0351717	-0.00791709	0.00188239	0.00265307
243.9	-0.851404	0.0320776	-0.0351821	-0.00791595	0.00189175	0.00266143
244.57	-0.858593	0.0313091	-0.0351918	-0.00791469	0.00190109	0.00266975
245.23	-0.865777	0.0305385	-0.0352008	-0.00791332	0.00191039	0.00267802
245.89	-0.872956	0.0297656	-0.0352091	-0.00791184	0.00191966	0.00268625
246.56	-0.880131	0.0289905	-0.0352167	-0.00791024	0.0019289	0.00269443
247.22	-0.8873	0.0282133	-0.0352235	-0.00790852	0.00193811	0.00270256
247.88	-0.894463	0.0274339	-0.0352296	-0.0079067	0.00194728	0.00271064
248.54	-0.901621	0.0266523	-0.0352349	-0.00790475	0.00195642	0.00271867
249.2	-0.908772	0.0258687	-0.0352395	-0.00790269	0.00196553	0.00272665
249.84	-0.915917	0.0250829	-0.0352434	-0.00790052	0.0019746	0.00273458
250.48	-0.923054	0.0242951	-0.0352464	-0.00789823	0.00198363	0.00274245
251.1	-0.930184	0.0235052	-0.0352488	-0.00789583	0.00199263	0.00275028
251.71	-0.937307	0.0227132	-0.0352503	-0.0078933	0.00200159	0.00275805
252.33	-0.944421	0.0219192	-0.0352511	-0.00789066	0.00201051	0.00276577
252.95	-0.951528	0.0211232	-0.0352511	-0.0078879	0.0020194	0.00277343
253.57	-0.958625	0.0203251	-0.0352503	-0.00788503	0.00202824	0.00278104
254.2	-0.965714	0.0195251	-0.0352488	-0.00788203	0.00203705	0.00278859
254.85	-0.972794	0.018723	-0.0352464	-0.00787892	0.00204581	0.00279609
255.51	-0.979864	0.017919	-0.0352432	-0.00787569	0.00205454	0.00280353
256.16	-0.986925	0.017113	-0.0352393	-0.00787233	0.00206322	0.00281091
256.8	-0.993976	0.0163051	-0.0352345	-0.00786886	0.00207187	0.00281823
257.42	-1.00102	0.0154952	-0.0352289	-0.00786527	0.00208047	0.0028255
258.03	-1.00805	0.0146834	-0.0352225	-0.00786156	0.00208903	0.0028327
258.63	-1.01507	0.0138697	-0.0352153	-0.00785773	0.00209754	0.00283985
259.24	-1.02208	0.0130541	-0.0352073	-0.00785377	0.00210601	0.00284693
259.84	-1.02907	0.0122365	-0.0351984	-0.0078497	0.00211444	0.00285395
260.44	-1.03606	0.011417	-0.0351887	-0.0078455	0.00212283	0.00286092
261.06	-1.04304	0.0105956	-0.0351782	-0.00784118	0.00213117	0.00286782
261.68	-1.05	0.00977228	-0.0351668	-0.00783673	0.00213946	0.00287466
262.28	-1.05696	0.00894701	-0.0351546	-0.00783216	0.00214771	0.00288144
262.88	-1.0639	0.0081198	-0.0351415	-0.00782747	0.00215592	0.00288815
263.48	-1.07083	0.00729068	-0.0351275	-0.00782265	0.00216408	0.0028948
264.08	-1.07774	0.00645964	-0.0351127	-0.0078177	0.00217219	0.00290139
264.7	-1.08465	0.00562671	-0.0350971	-0.00781263	0.00218025	0.00290791
265.32	-1.09154	0.00479189	-0.0350806	-0.00780743	0.00218827	0.00291437
265.92	-1.09842	0.00395518	-0.0350632	-0.00780211	0.00219624	0.00292076
266.56	-1.10529	0.00311661	-0.0350449	-0.00779665	0.00220417	0.00292709
267.19	-1.11214	0.00227618	-0.0350257	-0.00779107	0.00221204	0.00293335
267.82	-1.11898	0.00143391	-0.0350056	-0.00778536	0.00221986	0.00293954
268.44	-1.12581	0.00058981	-0.0349847	-0.00777951	0.00222763	0.00294566
269.05	-1.13262	-0.000256108	-0.0349628	-0.00777354	0.00223535	0.00295172
269.66	-1.13941	-0.00110384	-0.03494	-0.00776744	0.00224302	0.0029577
270.28	-1.14619	-0.00195336	-0.0349163	-0.00776121	0.00225064	0.00296361
270.9	-1.15296	-0.00280464	-0.0348917	-0.00775485	0.0022582	0.00296945
271.52	-1.15971	-0.00365767	-0.0348662	-0.00774835	0.00226571	0.00297522
272.14	-1.16644	-0.00451242	-0.0348397	-0.00774172	0.00227317	0.00298092
272.76	-1.17316	-0.00536888	-0.0348123	-0.00773497	0.00228057	0.00298654
273.38	-1.17986	-0.00622705	-0.0347839	-0.00772808	0.00228792	0.00299209
273.98	-1.18654	-0.0070869	-0.0347546	-0.00772105	0.00229521	0.00299757
274.57	-1.19321	-0.00794845	-0.0347244	-0.00771389	0.00230244	0.00300297
275.16	-1.19986	-0.00881169	-0.0346932	-0.0077066	0.00230961	0.00300829
275.74	-1.20649	-0.00967661	-0.034661	-0.00769917	0.00231673	0.00301353
276.31	-1.2131	-0.0105432	-0.0346279	-0.00769161	0.00232379	0.0030187
276.89	-1.2197	-0.0114116	-0.0345938	-0.0076839	0.00233079	0.0030238
277.48	-1.22627	-0.0122816	-0.0345587	-0.00767606	0.00233773	0.00302881
278.06	-1.23283	-0.0131534	-0.0345226	-0.00766808	0.00234462	0.00303375
278.66	-1.23937	-0.0140268	-0.0344855	-0.00765996	0.00235144	0.0030386
279.27	-1.24589	-0.0149019	-0.0344474	-0.0076517	0.0023582	0.00304338
279.86	-1.2524	-0.0157787	-0.0344083	-0.0076433	0.00236491	0.00304807
280.45	-1.25888	-0.0166571	-0.0343683	-0.00763475	0.00237155	0.00305269
281.04	-1.26534	-0.0175372	-0.0343271	-0.00762607	0.00237813	0.00305722
281.63	-1.27179	-0.018419	-0.034285	-0.00761723	0.00238464	0.00306167
282.2	-1.27821	-0.0193025	-0.0342419	-0.00760826	0.00239109	0.00306604
282.77	-1.28461	-0.0201876	-0.0341977	-0.00759913	0.00239748	0.00307032
283.34	-1.291	-0.0210744	-0.0341524	-0.00758986	0.00240381	0.00307452
283.91	-1.29736	-0.0219628	-0.0341061	-0.00758045	0.00241007	0.00307864
284.48	-1.3037	-0.0228529	-0.0340588	-0.00757088	0.00241626	0.00308267
285.05	-1.31002	-0.0237446	-0.0340104	-0.00756117	0.00242239	0.00308661
285.63	-1.31632	-0.024638	-0.0339609	-0.0075513	0.00242845	0.00309047
286.22	-1.32259	-0.0255329	-0.0339104	-0.00754129	0.00243445	0.00309424
286.8	-1.32885	-0.0264295	-0.0338588	-0.00753113	0.00244038	0.00309792
287.38	-1.33508	-0.0273277	-0.0338061	-0.00752082	0.00244624	0.00310151
287.96	-1.34129	-0.0282274	-0.0337523	-0.00751035	0.00245203	0.00310502
288.53	-1.34748	-0.0291288	-0.0336975	-0.00749973	0.00245775	0.00310843
289.1	-1.35364	-0.0300318	-0.0336415	-0.00748896	0.00246341	0.00311175
289.66	-1.35978	-0.0309364	-0.0335844	-0.00747804	0.00246899	0.00311499
290.23	-1.3659	-0.0318426	-0.0335263	-0.00746696	0.00247451	0.00311813
290.8	-1.37199	-0.0327504	-0.033467	-0.00745573	0.00247995	0.00312118
291.37	-1.37807	-0.0336598	-0.0334066	-0.00744434	0.00248532	0.00312414
291.95	-1.38411	-0.0345708	-0.0333451	-0.0074328	0.00249063	0.00312701
292.54	-1.39014	-0.0354834	-0.0332825	-0.0074211	0.00249586	0.00312978
293.14	-1.39614	-0.0363975	-0.0332187	-0.00740924	0.00250101	0.00313246
293.74	-1.40211	-0.0373132	-0.0331538	-0.00739722	0.0025061	0.00313505
294.33	-1.40806	-0.0382305	-0.0330877	-0.00738505	0.00251111	0.00313754
294.93	-1.41398	-0.0391493	-0.0330205	-0.00737271	0.00251605	0.00313993
295.52	-1.41988	-0.0400696	-0.0329522	-0.00736022	0.00252091	0.00314223
296.1	-1.42575	-0.0409915	-0.0328827	-0.00734757	0.00252569	0.00314443
296.68	-1.4316	-0.0419148	-0.032812	-0.00733475	0.0025304	0.00314653
297.24	-1.43742	-0.0428397	-0.0327401	-0.00732178	0.00253504	0.00314854
297.8	-1.44321	-0.043766	-0.0326671	-0.00730864	0.00253959	0.00315044
298.36	-1.44898	-0.0446938	-0.0325929	-0.00729535	0.00254407	0.00315224
298.92	-1.45472	-0.0456231	-0.0325175	-0.00728189	0.00254847	0.00315395
299.47	-1.46043	-0.0465537	-0.0324409	-0.00726827	0.00255279	0.00315555
300.02	-1.46611	-0.0474858	-0.0323631	-0.00725448	0.00255703	0.00315705
300.57	-1.47177	-0.0484192	-0.0322841	-0.00724054	0.00256119	0.00315845
301.11	-1.47739	-0.0493541	-0.0322039	-0.00722643	0.00256526	0.00315974
301.66	-1.48299	-0.0502903	-0.0321225	-0.00721215	0.00256926	0.00316093
302.21	-1.48856	-0.0512279	-0.0320399	-0.00719772	0.00257317	0.00316201
302.76	-1.4941	-0.0521668	-0.031956	-0.00718311	0.00257701	0.00316299
303.32	-1.4996	-0.0531071	-0.0318709	-0.00716835	0.00258075	0.00316386
303.9	-1.50508	-0.0540488	-0.0317846	-0.00715341	0.00258442	0.00316463
304.47	-1.51053	-0.0549919	-0.031697	-0.0071383	0.002588	0.00316528
305.04	-1.51595	-0.0559364	-0.0316082	-0.00712303	0.0025915	0.00316584
305.61	-1.52134	-0.0568823	-0.0315181	-0.00710759	0.00259491	0.00316628
306.16	-1.5267	-0.0578296	-0.0314268	-0.00709198	0.00259824	0.00316662
306.71	-1.53203	-0.0587783	-0.0313342	-0.00707619	0.00260148	0.00316684
307.25	-1.53733	-0.0597283	-0.0312403	-0.00706023	0.00260463	0.00316696
307.78	-1.54259	-0.0606798	-0.0311452	-0.0070441	0.0026077	0.00316697
308.32	-1.54783	-0.0616328	-0.0310487	-0.0070278	0.00261069	0.00316687
308.85	-1.55304	-0.0625871	-0.030951	-0.00701131	0.00261358	0.00316666
309.39	-1.55821	-0.0635429	-0.030852	-0.00699465	0.00261639	0.00316633
309.93	-1.56335	-0.0645002	-0.0307517	-0.00697781	0.00261912	0.0031659
310.47	-1.56847	-0.065459	-0.0306501	-0.0069608	0.00262175	0.00316535
311.02	-1.57355	-0.0664192	-0.0305471	-0.0069436	0.0026243	0.00316469
311.56	-1.5786	-0.0673808	-0.0304429	-0.00692622	0.00262675	0.00316392
312.11	-1.58361	-0.068344	-0.0303373	-0.00690866	0.00262912	0.00316303
312.65	-1.5886	-0.0693086	-0.0302304	-0.00689091	0.0026314	0.00316203
313.19	-1.59355	-0.0702746	-0.0301222	-0.00687299	0.00263359	0.00316092
313.73	-1.59847	-0.0712421	-0.0300126	-0.00685488	0.00263568	0.00315969
314.28	-1.60336	-0.0722111	-0.0299017	-0.00683659	0.00263769	0.00315835
314.82	-1.60822	-0.0731815	-0.0297894	-0.00681811	0.00263961	0.00315689
315.36	-1.61304	-0.0741535	-0.0296758	-0.00679944	0.00264143	0.00315531
315.9	-1.61783	-0.075127	-0.0295608	-0.00678059	0.00264316	0.00315362
316.44	-1.62259	-0.076102	-0.0294445	-0.00676154	0.0026448	0.00315181
316.97	-1.62731	-0.0770785	-0.0293268	-0.00674231	0.00264635	0.00314988
317.5	-1.63201	-0.0780566	-0.0292077	-0.00672289	0.00264781	0.00314784
318.04	-1.63667	-0.0790363	-0.0290872	-0.00670327	0.00264917	0.00314568
318.57	-1.64129	-0.0800175	-0.0289653	-0.00668346	0.00265045	0.0031434
319.11	-1.64589	-0.0810003	-0.0288421	-0.00666346	0.00265162	0.003141
319.66	-1.65044	-0.0819847	-0.0287174	-0.00664326	0.00265271	0.00313848
320.21	-1.65497	-0.0829706	-0.0285914	-0.00662287	0.0026537	0.00313584
320.77	-1.65946	-0.0839581	-0.0284639	-0.00660228	0.00265459	0.00313308
321.33	-1.66392	-0.0849471	-0.028335	-0.00658149	0.00265539	0.0031302
321.89	-1.66834	-0.0859377	-0.0282047	-0.00656051	0.00265609	0.0031272
322.44	-1.67273	-0.0869298	-0.028073	-0.00653932	0.0026567	0.00312407
322.98	-1.67709	-0.0879235	-0.0279398	-0.00651794	0.0026572	0.00312082
323.51	-1.68141	-0.0889188	-0.0278052	-0.00649635	0.00265761	0.00311745
324.03	-1.68569	-0.0899156	-0.0276691	-0.00647457	0.00265793	0.00311395
324.57	-1.68994	-0.0909138	-0.0275316	-0.00645258	0.00265814	0.00311033
325.11	-1.69415	-0.0919136	-0.0273926	-0.00643039	0.00265825	0.00310658
325.65	-1.69832	-0.0929148	-0.0272521	-0.006408	0.00265826	0.0031027
326.2	-1.70246	-0.0939174	-0.0271101	-0.00638541	0.00265817	0.00309869
326.74	-1.70656	-0.0949215	-0.0269667	-0.00636261	0.00265798	0.00309456
327.28	-1.71062	-0.095927	-0.0268218	-0.00633961	0.00265768	0.00309029
327.83	-1.71464	-0.0969338	-0.0266754	-0.0063164	0.00265728	0.00308589
328.38	-1.71863	-0.0979421	-0.0265275	-0.00629299	0.00265678	0.00308137
328.93	-1.72257	-0.0989517	-0.026378	-0.00626937	0.00265616	0.00307671
329.48	-1.72648	-0.0999627	-0.0262271	-0.00624555	0.00265545	0.00307191
330.03	-1.73034	-0.100975	-0.0260746	-0.00622151	0.00265462	0.00306698
330.57	-1.73417	-0.101989	-0.0259206	-0.00619727	0.00265369	0.00306192
331.12	-1.73796	-0.103004	-0.0257651	-0.00617282	0.00265266	0.00305672
331.67	-1.74171	-0.104021	-0.025608	-0.00614815	0.00265151	0.00305139
332.21	-1.74541	-0.105038	-0.0254493	-0.00612327	0.00265025	0.00304592
332.75	-1.74908	-0.106058	-0.0252891	-0.00609819	0.00264889	0.00304031
333.3	-1.7527	-0.107078	-0.0251273	-0.00607288	0.00264741	0.00303456
333.84	-1.75628	-0.1081	-0.024964	-0.00604737	0.00264582	0.00302868
334.37	-1.75982	-0.109123	-0.0247991	-0.00602164	0.00264412	0.00302265
334.9	-1.76331	-0.110147	-0.0246325	-0.00599569	0.0026423	0.00301648
335.43	-1.76676	-0.111172	-0.0244644	-0.00596953	0.00264037	0.00301016
335.95	-1.77017	-0.112199	-0.0242946	-0.00594315	0.00263833	0.00300371
336.47	-1.77354	-0.113227	-0.0241233	-0.00591655	0.00263616	0.0029971
336.98	-1.77685	-0.114256	-0.0239503	-0.00588974	0.00263388	0.00299035
337.5	-1.78013	-0.115286	-0.0237757	-0.0058627	0.00263149	0.00298346
338.02	-1.78336	-0.116317	-0.0235994	-0.00583545	0.00262897	0.00297642
338.54	-1.78654	-0.11735	-0.0234215	-0.00580797	0.00262634	0.00296923
339.07	-1.78968	-0.118383	-0.023242	-0.00578028	0.00262358	0.00296189
339.6	-1.79277	-0.119418	-0.0230607	-0.00575236	0.0026207	0.0029544
340.14	-1.79581	-0.120453	-0.0228779	-0.00572422	0.0026177	0.00294675
340.67	-1.7988	-0.12149	-0.0226933	-0.00569587	0.00261458	0.00293896
341.2	-1.80175	-0.122527	-0.0225071	-0.00566728	0.00261133	0.00293101
341.72	-1.80464	-0.123566	-0.0223191	-0.00563848	0.00260796	0.00292291
342.24	-1.80749	-0.124606	-0.0221295	-0.00560945	0.00260446	0.00291465
342.75	-1.81029	-0.125646	-0.0219382	-0.00558019	0.00260084	0.00290624
343.26	-1.81304	-0.126688	-0.0217451	-0.00555071	0.00259709	0.00289767
343.76	-1.81574	-0.12773	-0.0215504	-0.00552101	0.00259321	0.00288894
344.26	-1.81839	-0.128773	-0.0213539	-0.00549107	0.00258921	0.00288005
344.76	-1.82099	-0.129818	-0.0211557	-0.00546091	0.00258507	0.00287101
345.26	-1.82354	-0.130863	-0.0209557	-0.00543053	0.0025808	0.0028618
345.76	-1.82603	-0.131909	-0.020754	-0.00539991	0.00257641	0.00285243
346.27	-1.82847	-0.132955	-0.0205506	-0.00536907	0.00257188	0.0028429
346.78	-1.83086	-0.134003	-0.0203453	-0.005338	0.00256721	0.00283321
347.28	-1.8332	-0.135051	-0.0201383	-0.0053067	0.00256241	0.00282335
347.79	-1.83548	-0.136099	-0.0199296	-0.00527517	0.00255747	0.00281332
348.3	-1.8377	-0.137149	-0.019719	-0.00524341	0.0025524	0.00280312
348.81	-1.83987	-0.138199	-0.0195066	-0.00521143	0.00254719	0.00279275
349.31	-1.84198	-0.139249	-0.0192924	-0.00517921	0.00254183	0.00278221
349.82	-1.84404	-0.1403	-0.0190765	-0.00514676	0.00253634	0.0027715
350.33	-1.84603	-0.141352	-0.0188586	-0.00511408	0.00253071	0.00276062
350.83	-1.84797	-0.142404	-0.018639	-0.00508118	0.00252493	0.00274956
351.34	-1.84985	-0.143456	-0.0184175	-0.00504804	0.002519	0.00273833
351.84	-1.85167	-0.144508	-0.0181942	-0.00501467	0.00251293	0.00272691
352.35	-1.85343	-0.145561	-0.017969	-0.00498107	0.00250671	0.00271532
352.86	-1.85512	-0.146614	-0.017742	-0.00494724	0.00250035	0.00270355
353.37	-1.85676	-0.147668	-0.017513	-0.00491318	0.00249383	0.0026916
353.88	-1.85833	-0.148721	-0.0172822	-0.00487889	0.00248717	0.00267947
354.39	-1.85984	-0.149775	-0.0170495	-0.00484436	0.00248035	0.00266715
354.91	-1.86129	-0.150829	-0.016815	-0.0048096	0.00247339	0.00265465
355.42	-1.86268	-0.151883	-0.0165785	-0.0047746	0.00246627	0.00264196
355.93	-1.864	-0.152937	-0.0163401	-0.00473937	0.00245899	0.00262909
356.44	-1.86525	-0.153992	-0.0160997	-0.00470391	0.00245156	0.00261603
356.95	-1.86644	-0.155046	-0.0158575	-0.0046682	0.00244398	0.00260279
357.46	-1.86757	-0.156101	-0.0156133	-0.00463226	0.00243624	0.00258935
357.97	-1.86863	-0.157155	-0.0153672	-0.00459608	0.00242834	0.00257572
358.48	-1.86963	-0.15821	-0.0151191	-0.00455966	0.00242029	0.00256191
358.99	-1.87055	-0.159264	-0.0148691	-0.004523	0.00241208	0.0025479
359.49	-1.87141	-0.160319	-0.014617	-0.0044861	0.0024037	0.0025337
360	-1.87221	-0.161374	-0.014363	-0.00444895	0.00239517	0.0025193
360.5	-1.87293	-0.162428	-0.014107	-0.00441157	0.00238647	0.00250471
361	-1.87359	-0.163483	-0.0138491	-0.00437393	0.00237761	0.00248992
361.5	-1.87418	-0.164538	-0.0135891	-0.00433606	0.00236859	0.00247494
361.99	-1.8747	-0.165592	-0.0133271	-0.00429793	0.00235941	0.00245976
362.49	-1.87515	-0.166647	-0.0130631	-0.00425956	0.00235006	0.00244438
362.98	-1.87553	-0.167701	-0.012797	-0.00422094	0.00234054	0.0024288
363.47	-1.87584	-0.168756	-0.0125289	-0.00418208	0.00233086	0.00241302
363.96	-1.87608	-0.16981	-0.0122588	-0.00414296	0.00232101	0.00239704
364.44	-1.87625	-0.170864	-0.0119866	-0.0041036	0.00231099	0.00238085
364.91	-1.87635	-0.171918	-0.0117124	-0.00406398	0.0023008	0.00236447
365.37	-1.87638	-0.172972	-0.0114361	-0.00402411	0.00229045	0.00234788
365.83	-1.87633	-0.174026	-0.0111577	-0.00398399	0.00227992	0.00233108
366.3	-1.87622	-0.175079	-0.0108773	-0.00394361	0.00226923	0.00231408
366.76	-1.87603	-0.176133	-0.0105947	-0.00390297	0.00225836	0.00229688
367.23	-1.87577	-0.177187	-0.0103101	-0.00386208	0.00224732	0.00227946
367.7	-1.87544	-0.17824	-0.0100233	-0.00382093	0.00223611	0.00226185
368.18	-1.87503	-0.179294	-0.00973445	-0.00377951	0.00222473	0.00224402
368.67	-1.87455	-0.180347	-0.00944346	-0.00373784	0.00221318	0.00222599
369.16	-1.874	-0.1814	-0.00915035	-0.0036959	0.00220145	0.00220774
369.64	-1.87338	-0.182453	-0.00885509	-0.00365371	0.00218954	0.00218929
370.12	-1.87268	-0.183506	-0.00855768	-0.00361124	0.00217746	0.00217062
370.6	-1.8719	-0.184559	-0.00825812	-0.00356852	0.00216521	0.00215174
371.06	-1.87105	-0.185611	-0.00795639	-0.00352552	0.00215277	0.00213265
371.53	-1.87012	-0.186664	-0.00765249	-0.00348226	0.00214015	0.00211334
372	-1.86912	-0.187716	-0.00734639	-0.00343874	0.00212736	0.00209381
372.46	-1.86804	-0.188768	-0.00703811	-0.00339494	0.00211438	0.00207407
372.92	-1.86688	-0.189819	-0.00672762	-0.00335088	0.00210122	0.0020541
373.38	-1.86564	-0.19087	-0.00641492	-0.00330655	0.00208788	0.00203392
373.84	-1.86433	-0.191921	-0.0061	-0.00326195	0.00207435	0.00201351
374.3	-1.86293	-0.192971	-0.00578285	-0.00321708	0.00206063	0.00199289
374.76	-1.86146	-0.194021	-0.00546345	-0.00317193	0.00204673	0.00197203
375.22	-1.8599	-0.195071	-0.0051418	-0.00312652	0.00203264	0.00195095
375.69	-1.85826	-0.196119	-0.00481789	-0.00308084	0.00201836	0.00192965
376.16	-1.85654	-0.197168	-0.00449172	-0.00303489	0.00200388	0.00190811
376.63	-1.85473	-0.198215	-0.00416326	-0.00298866	0.00198922	0.00188635
377.11	-1.85284	-0.199262	-0.00383251	-0.00294216	0.00197436	0.00186435
377.6	-1.85087	-0.200309	-0.00349947	-0.00289538	0.0019593	0.00184212
378.09	-1.84882	-0.201355	-0.00316413	-0.00284833	0.00194406	0.00181967
378.58	-1.84668	-0.2024	-0.00282646	-0.002801	0.00192861	0.00179697
379.08	-1.84445	-0.203445	-0.00248648	-0.00275338	0.00191297	0.00177405
379.57	-1.84215	-0.204489	-0.00214416	-0.00270549	0.00189714	0.00175089
380.06	-1.83975	-0.205532	-0.0017995	-0.00265732	0.0018811	0.00172749
380.55	-1.83727	-0.206575	-0.00145249	-0.00260886	0.00186487	0.00170385
381.04	-1.8347	-0.207617	-0.00110311	-0.00256012	0.00184843	0.00167998
381.52	-1.83205	-0.208658	-0.000751362	-0.0025111	0.0018318	0.00165586
381.99	-1.8293	-0.209699	-0.00039723	-0.0024618	0.00181496	0.0016315
382.46	-1.82647	-0.210738	-4.07054e-05	-0.0024122	0.00179791	0.0016069
382.92	-1.82355	-0.211777	0.00031822	-0.00236232	0.00178067	0.00158206
383.38	-1.82054	-0.212815	0.000679554	-0.00231216	0.00176321	0.00155697
383.83	-1.81744	-0.213853	0.0010433	-0.0022617	0.00174555	0.00153164
384.29	-1.81425	-0.214889	0.00140948	-0.00221096	0.00172769	0.00150606
384.74	-1.81097	-0.215925	0.00177808	-0.00215992	0.00170961	0.00148023
385.18	-1.8076	-0.216959	0.00214912	-0.0021086	0.00169133	0.00145416
385.63	-1.80414	-0.217993	0.0025226	-0.00205698	0.00167283	0.00142783
386.08	-1.80058	-0.219026	0.00289852	-0.00200508	0.00165413	0.00140125
386.52	-1.79694	-0.220057	0.0032769	-0.00195289	0.00163521	0.00137443
386.97	-1.7932	-0.221088	0.00365774	-0.0019004	0.00161609	0.00134735
387.42	-1.78936	-0.222118	0.00404103	-0.00184762	0.00159675	0.00132002
387.87	-1.78544	-0.223147	0.0044268	-0.00179455	0.00157719	0.00129243
388.32	-1.78142	-0.224174	0.00481503	-0.00174119	0.00155743	0.0012646
388.78	-1.7773	-0.225201	0.00520573	-0.00168754	0.00153745	0.00123651
389.24	-1.7731	-0.226227	0.00559891	-0.00163359	0.00151725	0.00120816
389.71	-1.7688	-0.227251	0.00599456	-0.00157934	0.00149685	0.00117957
390.18	-1.7644	-0.228275	0.00639268	-0.00152481	0.00147623	0.00115072
390.65	-1.75992	-0.229297	0.00679329	-0.00146997	0.00145539	0.00112161
391.11	-1.75533	-0.230318	0.00719637	-0.00141485	0.00143435	0.00109225
391.57	-1.75066	-0.231339	0.00760194	-0.00135943	0.00141308	0.00106263
392.02	-1.74589	-0.232358	0.00801	-0.00130371	0.0013916	0.00103276
392.47	-1.74102	-0.233375	0.00842055	-0.00124771	0.0013699	0.00100263
392.91	-1.73605	-0.234392	0.00883359	-0.0011914	0.00134799	0.000972236
393.35	-1.73099	-0.235407	0.00924913	-0.00113481	0.00132586	0.000941588
393.79	-1.72584	-0.236421	0.00966716	-0.00107792	0.0013035	0.00091068
394.23	-1.72058	-0.237434	0.0100877	-0.00102074	0.00128093	0.000879513
394.66	-1.71523	-0.238446	0.0105107	-0.000963264	0.00125815	0.000848086
395.1	-1.70979	-0.239456	0.0109363	-0.000905498	0.00123514	0.000816399
395.54	-1.70424	-0.240464	0.0113643	-0.000847441	0.00121191	0.000784451
395.97	-1.6986	-0.241471	0.0117948	-0.000789094	0.00118846	0.000752243
396.41	-1.69285	-0.242477	0.0122278	-0.000730458	0.00116479	0.000719773
396.85	-1.68701	-0.243481	0.0126633	-0.000671534	0.0011409	0.000687041
397.29	-1.68107	-0.244483	0.0131012	-0.000612323	0.00111679	0.000654047
397.74	-1.67503	-0.245484	0.0135417	-0.000552825	0.00109246	0.000620791
398.18	-1.6689	-0.246483	0.0139847	-0.00049304	0.00106791	0.000587272
398.63	-1.66266	-0.247481	0.0144301	-0.000432969	0.00104313	0.00055349
399.08	-1.65632	-0.248477	0.014878	-0.000372612	0.00101814	0.000519446
399.53	-1.64988	-0.249471	0.0153284	-0.000311969	0.00099292	0.000485139
399.99	-1.64335	-0.250464	0.0157813	-0.00025104	0.00096748	0.000450569
400.43	-1.63671	-0.251455	0.0162366	-0.000189825	0.00094182	0.000415738
400.88	-1.62998	-0.252444	0.0166945	-0.000128325	0.000915939	0.000380644
401.32	-1.62314	-0.253431	0.0171548	-6.65393e-05	0.000889836	0.000345287
401.76	-1.61621	-0.254417	0.0176175	-4.46886e-06	0.000863513	0.000309668
402.2	-1.60917	-0.255401	0.0180828	5.78858e-05	0.000836967	0.000273787
402.64	-1.60204	-0.256383	0.0185505	0.000120525	0.000810201	0.000237642
403.08	-1.5948	-0.257364	0.0190206	0.000183449	0.000783213	0.000201235
403.52	-1.58747	-0.258342	0.0194933	0.000246657	0.000756004	0.000164565
403.95	-1.58003	-0.259319	0.0199684	0.00031015	0.000728573	0.000127633
404.39	-1.5725	-0.260294	0.020446	0.000373928	0.00070092	9.04369e-05
404.82	-1.56486	-0.261268	0.020926	0.000437989	0.000673047	5.29786e-05
405.26	-1.55713	-0.262239	0.0214085	0.000502334	0.000644954	1.52584e-05
405.69	-1.5493	-0.263209	0.0218934	0.000566962	0.00061664	-2.27231e-05
406.12	-1.54136	-0.264177	0.0223808	0.000631871	0.000588107	-6.09656e-05
406.56	-1.53333	-0.265143	0.0228706	0.000697061	0.000559354	-9.94687e-05
407	-1.5252	-0.266107	0.0233628	0.000762531	0.000530383	-0.000138232
407.44	-1.51697	-0.267069	0.0238574	0.000828277	0.000501194	-0.000177255
407.88	-1.50863	-0.268029	0.0243545	0.000894301	0.000471788	-0.000216536
408.33	-1.5002	-0.268988	0.0248539	0.000960601	0.000442164	-0.000256075
408.78	-1.49168	-0.269944	0.0253558	0.00102718	0.000412325	-0.000295872
409.24	-1.48305	-0.270899	0.02586	0.00109403	0.00038227	-0.000335926
409.71	-1.47433	-0.271851	0.0263665	0.00116115	0.000352	-0.000376235
410.17	-1.4655	-0.272802	0.0268755	0.00122855	0.000321517	-0.000416799
410.63	-1.45659	-0.273751	0.0273868	0.00129622	0.000290821	-0.000457617
411.09	-1.44757	-0.274698	0.0279004	0.00136417	0.000259914	-0.000498687
411.54	-1.43846	-0.275643	0.0284164	0.00143238	0.000228796	-0.000540009
411.99	-1.42925	-0.276586	0.0289347	0.00150086	0.000197468	-0.000581582
412.43	-1.41995	-0.277527	0.0294553	0.00156962	0.000165931	-0.000623405
412.86	-1.41055	-0.278467	0.0299782	0.00163864	0.000134184	-0.000665479
413.3	-1.40105	-0.279404	0.0305034	0.00170792	0.000102229	-0.000707802
413.73	-1.39146	-0.28034	0.0310309	0.00177747	7.00649e-05	-0.000750375
414.16	-1.38177	-0.281273	0.0315607	0.00184729	3.76929e-05	-0.000793197
414.58	-1.37199	-0.282205	0.0320927	0.00191737	5.11287e-06	-0.000836267
415.01	-1.36211	-0.283134	0.0326271	0.00198772	-2.7675e-05	-0.000879586
415.43	-1.35214	-0.284061	0.0331637	0.00205832	-6.06701e-05	-0.000923154
415.85	-1.34207	-0.284987	0.0337026	0.00212919	-9.38719e-05	-0.000966969
416.28	-1.3319	-0.28591	0.0342437	0.00220032	-0.00012728	-0.00101103
416.7	-1.32164	-0.286831	0.034787	0.0022717	-0.000160894	-0.00105534
417.13	-1.31129	-0.28775	0.0353326	0.00234334	-0.000194714	-0.00109989
417.56	-1.30083	-0.288666	0.0358805	0.00241524	-0.00022874	-0.0011447
417.99	-1.29029	-0.28958	0.0364305	0.00248738	-0.000262972	-0.00118974
418.43	-1.27964	-0.290492	0.0369827	0.00255978	-0.00029741	-0.00123504
418.87	-1.2689	-0.291402	0.0375372	0.00263243	-0.000332052	-0.00128058
419.31	-1.25806	-0.292309	0.0380938	0.00270533	-0.0003669	-0.00132637
419.76	-1.24713	-0.293214	0.0386527	0.00277848	-0.000401953	-0.0013724
420.2	-1.2361	-0.294117	0.0392137	0.00285187	-0.000437209	-0.00141867
420.64	-1.22498	-0.295017	0.0397769	0.00292551	-0.00047267	-0.00146519
421.08	-1.21376	-0.295914	0.0403422	0.00299939	-0.000508333	-0.00151196
421.51	-1.20244	-0.296809	0.0409097	0.00307352	-0.000544199	-0.00155896
421.93	-1.19103	-0.297702	0.0414794	0.0031479	-0.000580266	-0.00160621
422.36	-1.17952	-0.298592	0.0420512	0.00322251	-0.000616536	-0.0016537
422.78	-1.16792	-0.29948	0.0426251	0.00329736	-0.000653007	-0.00170144
423.19	-1.15622	-0.300365	0.0432012	0.00337246	-0.000689681	-0.00174941
423.61	-1.14443	-0.301248	0.0437794	0.00344779	-0.000726556	-0.00179763
424.03	-1.13254	-0.302127	0.0443597	0.00352336	-0.000763634	-0.00184609
424.44	-1.12055	-0.303004	0.0449421	0.00359916	-0.000800913	-0.00189479
424.85	-1.10847	-0.303879	0.0455267	0.00367521	-0.000838395	-0.00194374
425.27	-1.09629	-0.30475	0.0461133	0.00375148	-0.000876079	-0.00199292
425.69	-1.08402	-0.305619	0.0467021	0.00382799	-0.000913964	-0.00204235
426.1	-1.07164	-0.306485	0.0472929	0.00390473	-0.000952049	-0.00209202
426.52	-1.05918	-0.307349	0.0478858	0.00398171	-0.000990335	-0.00214193
426.94	-1.04661	-0.308209	0.0484808	0.00405891	-0.00102882	-0.00219208
427.37	-1.03395	-0.309066	0.0490778	0.00413633	-0.0010675	-0.00224247
427.79	-1.0212	-0.309921	0.0496768	0.00421398	-0.00110638	-0.0022931
428.23	-1.00835	-0.310773	0.0502779	0.00429185	-0.00114546	-0.00234396
428.66	-0.995401	-0.311621	0.050881	0.00436994	-0.00118474	-0.00239506
429.08	-0.98236	-0.312467	0.051486	0.00444824	-0.00122421	-0.00244639
429.51	-0.969225	-0.313309	0.0520931	0.00452676	-0.00126387	-0.00249796
429.92	-0.955995	-0.314149	0.052702	0.0046055	-0.00130373	-0.00254976
430.34	-0.942671	-0.314985	0.053313	0.00468444	-0.00134378	-0.00260179
430.75	-0.929255	-0.315818	0.0539258	0.00476359	-0.00138401	-0.00265404
431.17	-0.915745	-0.316648	0.0545405	0.00484295	-0.00142444	-0.00270653
431.58	-0.902144	-0.317475	0.0551571	0.00492251	-0.00146505	-0.00275924
431.99	-0.888452	-0.318299	0.0557756	0.00500227	-0.00150585	-0.00281218
432.4	-0.874669	-0.31912	0.0563959	0.00508223	-0.00154683	-0.00286533
432.82	-0.860795	-0.319937	0.057018	0.00516238	-0.00158799	-0.00291871
433.23	-0.84683	-0.320752	0.0576419	0.00524273	-0.00162934	-0.00297231
433.65	-0.832774	-0.321562	0.0582676	0.00532327	-0.00167087	-0.00302613
434.07	-0.818629	-0.32237	0.0588951	0.00540399	-0.00171258	-0.00308017
434.49	-0.804392	-0.323174	0.0595243	0.00548491	-0.00175446	-0.00313442
434.91	-0.790066	-0.323975	0.0601553	0.005566	-0.00179653	-0.0031889
435.33	-0.775649	-0.324773	0.0607881	0.00564728	-0.00183878	-0.00324359
435.76	-0.761142	-0.325566	0.0614225	0.00572874	-0.00188121	-0.0032985
436.19	-0.746546	-0.326357	0.0620586	0.00581037	-0.00192381	-0.00335361
436.63	-0.731861	-0.327144	0.0626964	0.00589217	-0.00196658	-0.00340895
437.07	-0.717088	-0.327927	0.0633359	0.00597415	-0.00200953	-0.00346449
437.51	-0.702226	-0.328706	0.0639769	0.00605629	-0.00205265	-0.00352024
437.96	-0.687276	-0.329482	0.0646196	0.00613859	-0.00209594	-0.0035762
438.4	-0.672238	-0.330254	0.0652639	0.00622105	-0.0021394	-0.00363237
438.84	-0.657113	-0.331023	0.0659097	0.00630367	-0.00218303	-0.00368874
439.29	-0.641901	-0.331787	0.0665571	0.00638645	-0.00222683	-0.00374532
439.73	-0.626601	-0.332548	0.067206	0.00646937	-0.0022708	-0.0038021
440.17	-0.611215	-0.333305	0.0678564	0.00655245	-0.00231493	-0.00385908
440.6	-0.595742	-0.334057	0.0685084	0.00663567	-0.00235922	-0.00391626
441.03	-0.580184	-0.334806	0.0691618	0.00671904	-0.00240368	-0.00397364
441.45	-0.56454	-0.335551	0.0698167	0.00680255	-0.0024483	-0.00403122
441.87	-0.548812	-0.336292	0.070473	0.0068862	-0.00249308	-0.004089
442.29	-0.533	-0.337029	0.0711307	0.00696998	-0.00253802	-0.00414697
442.7	-0.517104	-0.337762	0.0717898	0.0070539	-0.00258311	-0.00420513
443.11	-0.501124	-0.338491	0.0724503	0.00713796	-0.00262836	-0.00426348
443.52	-0.48506	-0.339216	0.0731122	0.00722215	-0.00267377	-0.00432203
443.92	-0.468913	-0.339937	0.0737755	0.00730646	-0.00271933	-0.00438077
444.33	-0.452683	-0.340654	0.0744401	0.0073909	-0.00276505	-0.00443969
444.73	-0.436369	-0.341366	0.075106	0.00747547	-0.00281092	-0.00449881
445.13	-0.419973	-0.342075	0.0757733	0.00756017	-0.00285695	-0.00455811
445.54	-0.403493	-0.342779	0.0764419	0.00764499	-0.00290313	-0.0046176
445.94	-0.386932	-0.343479	0.0771118	0.00772993	-0.00294945	-0.00467728
446.35	-0.370289	-0.344174	0.0777829	0.00781498	-0.00299593	-0.00473715
446.75	-0.353564	-0.344866	0.0784553	0.00790016	-0.00304256	-0.00479719
447.16	-0.336759	-0.345553	0.079129	0.00798545	-0.00308933	-0.00485742
447.57	-0.319874	-0.346236	0.0798039	0.00807085	-0.00313625	-0.00491783
447.98	-0.302909	-0.346915	0.08048	0.00815636	-0.00318331	-0.00497841
448.4	-0.285865	-0.347589	0.0811572	0.00824197	-0.00323052	-0.00503917
448.82	-0.268742	-0.348259	0.0818357	0.00832769	-0.00327786	-0.00510011
449.24	-0.25154	-0.348924	0.0825152	0.00841351	-0.00332534	-0.00516122
449.66	-0.234262	-0.349585	0.0831959	0.00849943	-0.00337297	-0.0052225
450.08	-0.216905	-0.350242	0.0838777	0.00858545	-0.00342073	-0.00528396
450.49	-0.199473	-0.350894	0.0845606	0.00867157	-0.00346862	-0.00534558
450.9	-0.181964	-0.351542	0.0852445	0.00875778	-0.00351665	-0.00540737
451.3	-0.16438	-0.352186	0.0859295	0.00884409	-0.00356481	-0.00546932
451.7	-0.146722	-0.352825	0.0866155	0.00893048	-0.0036131	-0.00553144
452.09	-0.12899	-0.35346	0.0873026	0.00901697	-0.00366152	-0.00559372
452.49	-0.111185	-0.354091	0.0879906	0.00910354	-0.00371006	-0.00565616
452.88	-0.0933067	-0.354717	0.0886796	0.00919019	-0.00375873	-0.00571876
453.28	-0.0753559	-0.355338	0.0893696	0.00927693	-0.00380753	-0.00578151
453.67	-0.0573329	-0.355956	0.0900605	0.00936375	-0.00385644	-0.00584442
454.07	-0.0392381	-0.356568	0.0907523	0.00945065	-0.00390548	-0.00590749
454.46	-0.0210716	-0.357177	0.0914451	0.00953762	-0.00395465	-0.00597071
454.87	-0.00283356	-0.35778	0.0921387	0.00962467	-0.00400393	-0.00603409
455.29	0.0154756	-0.358379	0.0928332	0.00971179	-0.00405333	-0.00609761
455.71	0.0338554	-0.358974	0.0935286	0.00979898	-0.00410285	-0.00616129
456.12	0.0523054	-0.359564	0.0942249	0.00988624	-0.00415249	-0.00622512
456.54	0.0708249	-0.360149	0.0949219	0.00997357	-0.00420224	-0.00628909
456.95	0.0894138	-0.36073	0.0956198	0.010061	-0.00425211	-0.00635321
457.37	0.108072	-0.361306	0.0963184	0.0101484	-0.00430209	-0.00641748
457.79	0.126798	-0.361877	0.0970178	0.0102359	-0.00435218	-0.00648188
458.22	0.145594	-0.362444	0.097718	0.0103235	-0.00440239	-0.00654643
458.65	0.164457	-0.363005	0.0984189	0.0104111	-0.0044527	-0.00661113
459.07	0.183387	-0.363562	0.0991205	0.0104988	-0.00450312	-0.00667596
459.5	0.202386	-0.364114	0.0998228	0.0105865	-0.00455364	-0.00674093
459.92	0.221451	-0.364662	0.100526	0.0106742	-0.00460428	-0.00680603
460.35	0.240583	-0.365204	0.101229	0.010762	-0.00465502	-0.00687128
460.78	0.259781	-0.365741	0.101934	0.0108499	-0.00470586	-0.00693666
461.2	0.279045	-0.366274	0.102639	0.0109378	-0.00475681	-0.00700217
461.63	0.298374	-0.366802	0.103344	0.0110257	-0.00480785	-0.00706781
462.06	0.317768	-0.367324	0.10405	0.0111137	-0.004859	-0.00713359
462.51	0.337226	-0.367842	0.104757	0.0112017	-0.00491025	-0.0071995
462.95	0.356749	-0.368355	0.105465	0.0112897	-0.00496159	-0.00726553
463.39	0.376336	-0.368863	0.106173	0.0113778	-0.00501304	-0.0073317
463.84	0.395987	-0.369366	0.106881	0.0114659	-0.00506458	-0.00739799
464.28	0.415701	-0.369864	0.10759	0.0115541	-0.00511622	-0.00746441
464.72	0.43548	-0.370357	0.1083	0.0116423	-0.00516795	-0.00753095
465.16	0.455321	-0.370845	0.10901	0.0117305	-0.00521978	-0.00759762
465.6	0.475226	-0.371328	0.10972	0.0118187	-0.0052717	-0.00766442
466.04	0.495193	-0.371805	0.110431	0.011907	-0.00532371	-0.00773133
466.48	0.515223	-0.372278	0.111143	0.0119952	-0.00537582	-0.00779837
466.92	0.535314	-0.372746	0.111855	0.0120835	-0.00542801	-0.00786553
467.37	0.555465	-0.373208	0.112568	0.0121719	-0.0054803	-0.00793281
467.81	0.575677	-0.373665	0.11328	0.0122602	-0.00553266	-0.0080002
468.26	0.595949	-0.374117	0.113994	0.0123486	-0.00558512	-0.00806771
468.71	0.61628	-0.374564	0.114707	0.0124369	-0.00563765	-0.00813533
469.16	0.636669	-0.375006	0.115421	0.0125253	-0.00569027	-0.00820305
469.61	0.657116	-0.375442	0.116136	0.0126137	-0.00574297	-0.00827089
470.06	0.67762	-0.375873	0.11685	0.012702	-0.00579574	-0.00833883
470.5	0.69818	-0.376299	0.117565	0.0127904	-0.00584859	-0.00840688
470.93	0.718796	-0.37672	0.11828	0.0128788	-0.00590151	-0.00847502
471.35	0.739466	-0.377135	0.118995	0.0129671	-0.0059545	-0.00854327
471.77	0.760189	-0.377545	0.119711	0.0130555	-0.00600755	-0.00861161
472.19	0.780964	-0.37795	0.120426	0.0131438	-0.00606068	-0.00868004
472.6	0.801791	-0.378349	0.121142	0.0132321	-0.00611386	-0.00874856
473.01	0.822668	-0.378743	0.121858	0.0133204	-0.00616711	-0.00881717
473.42	0.843595	-0.379132	0.122573	0.0134087	-0.00622041	-0.00888587
473.83	0.86457	-0.379516	0.123289	0.0134969	-0.00627377	-0.00895465
474.23	0.885594	-0.379894	0.124005	0.0135851	-0.00632718	-0.0090235
474.64	0.906666	-0.380266	0.124721	0.0136733	-0.00638064	-0.00909244
475.05	0.927784	-0.380634	0.125437	0.0137614	-0.00643415	-0.00916145
475.46	0.948948	-0.380995	0.126152	0.0138495	-0.00648772	-0.00923054
475.87	0.970158	-0.381352	0.126868	0.0139375	-0.00654132	-0.0092997
476.29	0.991412	-0.381703	0.127583	0.0140255	-0.00659497	-0.00936892
476.7	1.01271	-0.382048	0.128298	0.0141135	-0.00664866	-0.00943821
477.11	1.03405	-0.382388	0.129013	0.0142014	-0.00670238	-0.00950757
477.53	1.05543	-0.382722	0.129728	0.0142892	-0.00675614	-0.00957698
477.96	1.07685	-0.38305	0.130442	0.0143769	-0.00680993	-0.00964644
478.39	1.09831	-0.383373	0.131156	0.0144646	-0.00686375	-0.00971596
478.82	1.1198	-0.38369	0.13187	0.0145522	-0.00691759	-0.00978553
479.23	1.14134	-0.384002	0.132583	0.0146397	-0.00697146	-0.00985514
479.64	1.16291	-0.384308	0.133296	0.0147271	-0.00702534	-0.00992479
480.05	1.18451	-0.384608	0.134008	0.0148144	-0.00707924	-0.00999449
480.46	1.20615	-0.384902	0.13472	0.0149016	-0.00713315	-0.0100642
480.86	1.22782	-0.385191	0.135431	0.0149888	-0.00718708	-0.010134
481.27	1.24952	-0.385473	0.136142	0.0150758	-0.00724101	-0.0102038
481.67	1.27126	-0.38575	0.136852	0.0151627	-0.00729496	-0.0102736
482.07	1.29302	-0.386021	0.137561	0.0152495	-0.0073489	-0.0103435
482.47	1.31481	-0.386287	0.138269	0.0153362	-0.00740284	-0.0104133
482.87	1.33663	-0.386546	0.138977	0.0154228	-0.00745679	-0.0104832
483.28	1.35848	-0.3868	0.139685	0.0155092	-0.00751073	-0.0105531
483.68	1.38035	-0.387048	0.140391	0.0155956	-0.00756466	-0.0106231
484.1	1.40224	-0.38729	0.141096	0.0156818	-0.00761859	-0.010693
484.51	1.42417	-0.387527	0.141801	0.0157678	-0.0076725	-0.0107629
484.93	1.44611	-0.387757	0.142505	0.0158538	-0.00772641	-0.0108329
485.35	1.46808	-0.387982	0.143208	0.0159396	-0.0077803	-0.0109029
485.78	1.49007	-0.3882	0.14391	0.0160253	-0.00783417	-0.0109728
486.21	1.51209	-0.388413	0.144611	0.0161108	-0.00788802	-0.0110428
486.64	1.53412	-0.38862	0.145312	0.0161962	-0.00794186	-0.0111128
487.07	1.55617	-0.388821	0.146011	0.0162814	-0.00799566	-0.0111827
487.5	1.57824	-0.389016	0.146709	0.0163665	-0.00804944	-0.0112527
487.92	1.60032	-0.389205	0.147406	0.0164515	-0.00810319	-0.0113226
488.35	1.62242	-0.389388	0.148102	0.0165362	-0.00815691	-0.0113926
488.77	1.64453	-0.389566	0.148797	0.0166208	-0.00821058	-0.0114625
489.19	1.66666	-0.389737	0.149491	0.0167053	-0.00826421	-0.0115323
489.61	1.6888	-0.389902	0.150183	0.0167895	-0.0083178	-0.0116022
490.04	1.71094	-0.390062	0.150874	0.0168736	-0.00837134	-0.011672
490.47	1.7331	-0.390215	0.151564	0.0169575	-0.00842483	-0.0117418
490.9	1.75526	-0.390363	0.152252	0.0170412	-0.00847826	-0.0118115
491.33	1.77743	-0.390504	0.152939	0.0171247	-0.00853164	-0.0118812
491.75	1.7996	-0.39064	0.153625	0.017208	-0.00858496	-0.0119509
492.18	1.82178	-0.390769	0.154309	0.0172911	-0.00863821	-0.0120205
492.61	1.84395	-0.390893	0.154991	0.017374	-0.00869139	-0.0120901
493.05	1.86613	-0.39101	0.155672	0.0174567	-0.00874451	-0.0121596
493.48	1.88831	-0.391122	0.156352	0.0175392	-0.00879755	-0.0122291
493.9	1.91049	-0.391228	0.15703	0.0176215	-0.00885051	-0.0122984
494.33	1.93266	-0.391327	0.157706	0.0177035	-0.0089034	-0.0123678
494.76	1.95483	-0.391421	0.15838	0.0177853	-0.0089562	-0.012437
495.19	1.977	-0.391508	0.159053	0.0178669	-0.00900892	-0.0125062
495.62	1.99916	-0.39159	0.159724	0.0179483	-0.00906156	-0.0125753
496.04	2.02132	-0.391665	0.160393	0.0180294	-0.00911411	-0.0126444
496.46	2.04347	-0.391734	0.161061	0.0181103	-0.00916657	-0.0127133
496.87	2.06561	-0.391797	0.161726	0.018191	-0.00921893	-0.0127822
497.28	2.08775	-0.391854	0.16239	0.0182714	-0.0092712	-0.012851
497.68	2.10987	-0.391905	0.163052	0.0183515	-0.00932336	-0.0129197
498.08	2.13198	-0.391949	0.163711	0.0184314	-0.00937543	-0.0129884
498.47	2.15408	-0.391987	0.164369	0.0185111	-0.00942739	-0.0130569
498.87	2.17617	-0.392019	0.165025	0.0185904	-0.00947924	-0.0131253
499.26	2.19825	-0.392045	0.165679	0.0186695	-0.00953099	-0.0131937
499.65	2.22031	-0.392064	0.16633	0.0187483	-0.00958262	-0.0132619
500.04	2.24235	-0.392076	0.16698	0.0188269	-0.00963413	-0.01333
500.43	2.26438	-0.392083	0.167627	0.0189051	-0.00968553	-0.0133981
500.83	2.2864	-0.392082	0.168272	0.0189831	-0.00973682	-0.013466
501.22	2.30839	-0.392076	0.168915	0.0190608	-0.00978798	-0.0135338
501.62	2.33037	-0.392063	0.169556	0.0191382	-0.00983901	-0.0136015
502.02	2.35233	-0.392043	0.170194	0.0192153	-0.00988993	-0.0136691
502.43	2.37427	-0.392017	0.17083	0.0192921	-0.00994071	-0.0137365
502.84	2.39619	-0.391984	0.171464	0.0193686	-0.00999137	-0.0138039
503.25	2.41808	-0.391945	0.172095	0.0194448	-0.0100419	-0.0138711
503.66	2.43996	-0.391899	0.172724	0.0195206	-0.0100923	-0.0139382
504.07	2.46182	-0.391846	0.173351	0.0195962	-0.0101425	-0.0140052
504.47	2.48365	-0.391787	0.173975	0.0196715	-0.0101927	-0.014072
504.87	2.50546	-0.39172	0.174597	0.0197464	-0.0102427	-0.0141387
505.27	2.52725	-0.391647	0.175217	0.0198211	-0.0102925	-0.0142053
505.67	2.54901	-0.391568	0.175833	0.0198954	-0.0103422	-0.0142718
506.06	2.57076	-0.391481	0.176448	0.0199693	-0.0103918	-0.0143381
506.44	2.59247	-0.391388	0.17706	0.020043	-0.0104412	-0.0144043
506.83	2.61417	-0.391287	0.177669	0.0201163	-0.0104905	-0.0144704
507.22	2.63583	-0.39118	0.178276	0.0201893	-0.0105397	-0.0145363
507.6	2.65747	-0.391066	0.17888	0.020262	-0.0105887	-0.0146021
507.99	2.67909	-0.390944	0.179481	0.0203343	-0.0106375	-0.0146678
508.38	2.70067	-0.390816	0.18008	0.0204062	-0.0106862	-0.0147333
508.77	2.72223	-0.39068	0.180676	0.0204778	-0.0107347	-0.0147986
509.16	2.74375	-0.390538	0.181269	0.0205491	-0.0107831	-0.0148638
509.55	2.76524	-0.390388	0.18186	0.02062	-0.0108313	-0.0149288
509.95	2.78671	-0.390231	0.182448	0.0206905	-0.0108793	-0.0149937
510.35	2.80814	-0.390066	0.183032	0.0207606	-0.0109272	-0.0150584
510.75	2.82953	-0.389895	0.183614	0.0208304	-0.0109749	-0.015123
511.15	2.85089	-0.389716	0.184193	0.0208998	-0.0110224	-0.0151873
511.55	2.87222	-0.38953	0.184769	0.0209688	-0.0110698	-0.0152515
511.96	2.8935	-0.389336	0.185342	0.0210374	-0.011117	-0.0153156
512.36	2.91475	-0.389136	0.185912	0.0211056	-0.011164	-0.0153794
512.77	2.93596	-0.388927	0.186479	0.0211734	-0.0112108	-0.0154431
513.17	2.95713	-0.388711	0.187042	0.0212409	-0.0112574	-0.0155066
513.58	2.97827	-0.388488	0.187603	0.0213079	-0.0113038	-0.0155699
513.99	2.99936	-0.388257	0.18816	0.0213745	-0.0113501	-0.0156331
514.4	3.02041	-0.388019	0.188714	0.0214407	-0.0113961	-0.015696
514.81	3.04142	-0.387772	0.189265	0.0215064	-0.011442	-0.0157587
515.23	3.06239	-0.387518	0.189813	0.0215718	-0.0114877	-0.0158213
515.64	3.08332	-0.387257	0.190357	0.0216367	-0.0115332	-0.0158837
516.05	3.1042	-0.386987	0.190898	0.0217012	-0.0115785	-0.0159459
516.47	3.12505	-0.386709	0.191436	0.0217652	-0.0116235	-0.0160078
516.88	3.14584	-0.386424	0.19197	0.0218289	-0.0116684	-0.0160696
517.3	3.1666	-0.38613	0.192501	0.021892	-0.0117131	-0.0161312
517.71	3.1873	-0.385829	0.193028	0.0219548	-0.0117576	-0.0161926
518.13	3.20797	-0.385519	0.193552	0.022017	-0.0118018	-0.0162537
518.54	3.22858	-0.385201	0.194073	0.0220788	-0.0118459	-0.0163147
518.95	3.24915	-0.384875	0.194589	0.0221402	-0.0118897	-0.0163754
519.37	3.26967	-0.38454	0.195103	0.022201	-0.0119333	-0.0164359
519.78	3.29014	-0.384197	0.195612	0.0222614	-0.0119767	-0.0164962
520.19	3.31057	-0.383846	0.196118	0.0223213	-0.0120199	-0.0165563
520.61	3.33094	-0.383487	0.196621	0.0223808	-0.0120629	-0.0166162
521.02	3.35127	-0.383118	0.197119	0.0224397	-0.0121056	-0.0166758
521.43	3.37154	-0.382742	0.197614	0.0224982	-0.0121481	-0.0167352
521.83	3.39176	-0.382357	0.198105	0.0225562	-0.0121904	-0.0167944
522.23	3.41193	-0.381963	0.198592	0.0226137	-0.0122325	-0.0168534
522.62	3.43204	-0.381561	0.199076	0.0226706	-0.0122743	-0.0169121
523.01	3.4521	-0.38115	0.199555	0.0227271	-0.0123159	-0.0169706
523.4	3.47211	-0.38073	0.200031	0.0227831	-0.0123572	-0.0170288
523.78	3.49206	-0.380302	0.200503	0.0228385	-0.0123983	-0.0170869
524.16	3.51195	-0.379864	0.20097	0.0228935	-0.0124392	-0.0171446
524.54	3.5318	-0.379418	0.201434	0.0229479	-0.0124798	-0.0172022
524.91	3.55158	-0.378963	0.201894	0.0230018	-0.0125202	-0.0172594
525.29	3.57131	-0.378499	0.20235	0.0230552	-0.0125604	-0.0173165
525.67	3.59098	-0.378027	0.202802	0.023108	-0.0126003	-0.0173733
526.04	3.6106	-0.377545	0.20325	0.0231604	-0.01264	-0.0174298
526.42	3.63015	-0.377054	0.203693	0.0232122	-0.0126794	-0.0174861
526.8	3.64964	-0.376554	0.204133	0.0232634	-0.0127185	-0.0175421
527.18	3.66908	-0.376045	0.204568	0.0233141	-0.0127574	-0.0175979
527.57	3.68845	-0.375527	0.204999	0.0233643	-0.012796	-0.0176534
527.96	3.70776	-0.375	0.205426	0.0234139	-0.0128344	-0.0177086
528.35	3.72701	-0.374464	0.205849	0.0234629	-0.0128725	-0.0177636
528.75	3.74619	-0.373918	0.206267	0.0235114	-0.0129104	-0.0178183
529.14	3.7653	-0.373363	0.206681	0.0235593	-0.012948	-0.0178727
529.53	3.78435	-0.372799	0.20709	0.0236066	-0.0129853	-0.0179269
529.93	3.80334	-0.372225	0.207495	0.0236534	-0.0130223	-0.0179807
530.31	3.82225	-0.371642	0.207896	0.0236996	-0.0130591	-0.0180343
530.7	3.8411	-0.37105	0.208292	0.0237452	-0.0130955	-0.0180876
531.08	3.85987	-0.370449	0.208684	0.0237902	-0.0131317	-0.0181407
531.46	3.87858	-0.369838	0.20907	0.0238346	-0.0131677	-0.0181934
531.83	3.89721	-0.369217	0.209453	0.0238784	-0.0132033	-0.0182458
532.2	3.91577	-0.368587	0.209831	0.0239217	-0.0132386	-0.0182979
532.57	3.93426	-0.367948	0.210204	0.0239643	-0.0132737	-0.0183498
532.94	3.95267	-0.367299	0.210572	0.0240063	-0.0133084	-0.0184013
533.32	3.97101	-0.36664	0.210936	0.0240477	-0.0133429	-0.0184525
533.69	3.98928	-0.365971	0.211295	0.0240885	-0.013377	-0.0185035
534.06	4.00747	-0.365293	0.211649	0.0241287	-0.0134109	-0.0185541
534.43	4.02559	-0.364605	0.211999	0.0241683	-0.0134445	-0.0186044
534.81	4.04364	-0.363907	0.212343	0.0242072	-0.0134777	-0.0186544
535.18	4.0616	-0.363199	0.212683	0.0242455	-0.0135107	-0.0187041
535.57	4.0795	-0.362481	0.213018	0.0242832	-0.0135434	-0.0187535
535.95	4.09731	-0.361754	0.213348	0.0243202	-0.0135757	-0.0188026
536.34	4.11505	-0.361016	0.213673	0.0243567	-0.0136078	-0.0188514
536.73	4.13272	-0.360267	0.213994	0.0243924	-0.0136395	-0.0188999
537.12	4.15031	-0.359509	0.214309	0.0244275	-0.013671	-0.018948
537.5	4.16782	-0.35874	0.214619	0.024462	-0.0137021	-0.0189958
537.89	4.18525	-0.357961	0.214925	0.0244958	-0.013733	-0.0190433
538.27	4.20261	-0.357171	0.215225	0.024529	-0.0137635	-0.0190905
538.66	4.21989	-0.356371	0.21552	0.0245614	-0.0137937	-0.0191373
539.04	4.23709	-0.35556	0.21581	0.0245933	-0.0138236	-0.0191839
539.43	4.25421	-0.354739	0.216095	0.0246244	-0.0138531	-0.0192301
539.82	4.27125	-0.353907	0.216375	0.0246549	-0.0138824	-0.019276
540.21	4.28821	-0.353065	0.21665	0.0246847	-0.0139113	-0.0193215
540.6	4.30509	-0.352212	0.21692	0.0247139	-0.0139399	-0.0193667
540.99	4.32189	-0.351348	0.217184	0.0247423	-0.0139682	-0.0194116
541.37	4.33862	-0.350473	0.217443	0.0247701	-0.0139962	-0.0194562
541.76	4.35526	-0.349588	0.217697	0.0247972	-0.0140238	-0.0195004
542.15	4.37182	-0.348691	0.217946	0.0248236	-0.0140512	-0.0195443
542.53	4.3883	-0.347784	0.218189	0.0248493	-0.0140782	-0.0195878
542.92	4.4047	-0.346865	0.218428	0.0248744	-0.0141048	-0.019631
543.31	4.42102	-0.345935	0.21866	0.0248987	-0.0141312	-0.0196739
543.7	4.43725	-0.344995	0.218888	0.0249223	-0.0141572	-0.0197164
544.1	4.45341	-0.344042	0.21911	0.0249452	-0.0141829	-0.0197586
544.5	4.46948	-0.343079	0.219327	0.0249675	-0.0142082	-0.0198005
544.89	4.48547	-0.342104	0.219538	0.024989	-0.0142333	-0.019842
545.29	4.50138	-0.341118	0.219744	0.0250097	-0.0142579	-0.0198831
545.69	4.51721	-0.340121	0.219945	0.0250298	-0.0142823	-0.0199239
546.08	4.53295	-0.339112	0.22014	0.0250491	-0.0143063	-0.0199644
546.47	4.5486	-0.338091	0.220329	0.0250678	-0.01433	-0.0200044
546.85	4.56417	-0.337059	0.220513	0.0250856	-0.0143533	-0.0200442
547.23	4.57965	-0.336015	0.220691	0.0251028	-0.0143763	-0.0200836
547.61	4.59504	-0.33496	0.220863	0.0251192	-0.0143989	-0.0201226
547.99	4.61035	-0.333893	0.22103	0.0251348	-0.0144211	-0.0201612
548.36	4.62556	-0.332814	0.221191	0.0251497	-0.0144431	-0.0201995
548.74	4.64068	-0.331723	0.221347	0.0251638	-0.0144646	-0.0202374
549.11	4.65571	-0.33062	0.221496	0.0251771	-0.0144858	-0.0202749
549.47	4.67065	-0.329506	0.221639	0.0251897	-0.0145066	-0.020312
549.84	4.68549	-0.328379	0.221777	0.0252015	-0.0145271	-0.0203488
550.2	4.70023	-0.327241	0.221909	0.0252126	-0.0145471	-0.0203851
550.56	4.71488	-0.326091	0.222034	0.0252228	-0.0145668	-0.0204211
550.92	4.72943	-0.324928	0.222154	0.0252322	-0.0145862	-0.0204566
551.29	4.74388	-0.323754	0.222267	0.0252409	-0.0146051	-0.0204918
551.65	4.75824	-0.322567	0.222374	0.0252487	-0.0146237	-0.0205266
552.01	4.77249	-0.321368	0.222476	0.0252557	-0.0146418	-0.0205609
552.38	4.78664	-0.320157	0.222571	0.025262	-0.0146596	-0.0205949
552.74	4.8007	-0.318933	0.222659	0.0252674	-0.014677	-0.0206284
553.11	4.81465	-0.317697	0.222742	0.0252719	-0.014694	-0.0206616
553.48	4.82849	-0.316448	0.222818	0.0252757	-0.0147106	-0.0206943
553.86	4.84223	-0.315187	0.222887	0.0252786	-0.0147268	-0.0207266
554.23	4.85586	-0.313913	0.222951	0.0252806	-0.0147426	-0.0207585
554.6	4.86939	-0.312627	0.223007	0.0252818	-0.014758	-0.0207899
554.98	4.88281	-0.311328	0.223057	0.0252821	-0.0147729	-0.0208209
555.36	4.89611	-0.310016	0.223101	0.0252816	-0.0147875	-0.0208515
555.73	4.90931	-0.308691	0.223138	0.0252802	-0.0148016	-0.0208816
556.1	4.92239	-0.307353	0.223168	0.0252779	-0.0148153	-0.0209113
556.47	4.93536	-0.306003	0.223191	0.0252748	-0.0148286	-0.0209405
556.83	4.94822	-0.304639	0.223208	0.0252707	-0.0148414	-0.0209693
557.2	4.96095	-0.303263	0.223218	0.0252658	-0.0148539	-0.0209976
557.55	4.97357	-0.301873	0.223221	0.0252599	-0.0148658	-0.0210255
557.91	4.98608	-0.30047	0.223217	0.0252531	-0.0148774	-0.0210529
558.27	4.99846	-0.299055	0.223206	0.0252454	-0.0148885	-0.0210798
558.62	5.01072	-0.297626	0.223188	0.0252368	-0.0148991	-0.0211062
558.98	5.02285	-0.296183	0.223162	0.0252273	-0.0149093	-0.0211322
559.34	5.03487	-0.294728	0.22313	0.0252169	-0.014919	-0.0211577
559.69	5.04676	-0.293259	0.223091	0.0252055	-0.0149283	-0.0211827
560.05	5.05852	-0.291777	0.223044	0.0251931	-0.0149371	-0.0212072
560.41	5.07015	-0.290282	0.22299	0.0251798	-0.0149455	-0.0212313
560.77	5.08166	-0.288773	0.222929	0.0251656	-0.0149533	-0.0212548
561.14	5.09304	-0.28725	0.22286	0.0251504	-0.0149607	-0.0212778
561.51	5.10429	-0.285715	0.222784	0.0251342	-0.0149677	-0.0213004
561.88	5.11541	-0.284165	0.2227	0.0251171	-0.0149741	-0.0213224
562.26	5.12639	-0.282602	0.222609	0.0250989	-0.0149801	-0.0213439
562.64	5.13724	-0.281025	0.222511	0.0250798	-0.0149856	-0.0213649
563.02	5.14795	-0.279435	0.222405	0.0250597	-0.0149906	-0.0213854
563.4	5.15852	-0.277831	0.222291	0.0250386	-0.0149951	-0.0214053
563.77	5.16894	-0.276213	0.222169	0.0250165	-0.014999	-0.0214248
564.14	5.17923	-0.274581	0.222039	0.0249933	-0.0150025	-0.0214436
564.52	5.18937	-0.272936	0.221902	0.0249692	-0.0150055	-0.0214619
564.89	5.19936	-0.271276	0.221756	0.024944	-0.0150079	-0.0214797
565.25	5.20921	-0.269603	0.221603	0.0249177	-0.0150098	-0.0214969
565.62	5.2189	-0.267916	0.221441	0.0248904	-0.0150112	-0.0215136
565.99	5.22844	-0.266215	0.221272	0.0248621	-0.0150121	-0.0215297
566.36	5.23783	-0.2645	0.221094	0.0248327	-0.0150124	-0.0215452
566.72	5.24706	-0.262771	0.220907	0.0248022	-0.0150121	-0.0215601
567.1	5.25613	-0.261028	0.220713	0.0247706	-0.0150114	-0.0215745
567.47	5.26504	-0.259271	0.22051	0.0247379	-0.01501	-0.0215882
567.85	5.27379	-0.2575	0.220298	0.0247042	-0.0150081	-0.0216014
568.23	5.28237	-0.255714	0.220078	0.0246693	-0.0150057	-0.021614
568.61	5.29078	-0.253915	0.219849	0.0246334	-0.0150026	-0.0216259
568.99	5.29903	-0.252101	0.219612	0.0245963	-0.014999	-0.0216373
569.37	5.30711	-0.250273	0.219366	0.0245581	-0.0149948	-0.021648
569.76	5.31503	-0.248431	0.219111	0.0245188	-0.0149901	-0.0216581
570.14	5.32277	-0.246574	0.218847	0.0244783	-0.0149847	-0.0216676
570.52	5.33034	-0.244703	0.218575	0.0244367	-0.0149788	-0.0216765
570.89	5.33774	-0.242817	0.218293	0.0243939	-0.0149723	-0.0216847
571.26	5.34496	-0.240917	0.218003	0.02435	-0.0149652	-0.0216923
571.62	5.35201	-0.239002	0.217703	0.024305	-0.0149574	-0.0216993
571.98	5.35888	-0.237073	0.217395	0.0242587	-0.0149491	-0.0217056
572.34	5.36558	-0.235128	0.217077	0.0242113	-0.0149402	-0.0217113
572.71	5.37209	-0.233169	0.216751	0.0241627	-0.0149307	-0.0217163
573.07	5.37842	-0.231195	0.216415	0.0241129	-0.0149205	-0.0217206
573.44	5.38457	-0.229206	0.216069	0.0240619	-0.0149098	-0.0217244
573.8	5.39054	-0.227202	0.215715	0.0240097	-0.0148984	-0.0217274
574.16	5.39633	-0.225183	0.215351	0.0239563	-0.0148864	-0.0217298
574.51	5.40193	-0.223148	0.214977	0.0239017	-0.0148737	-0.0217315
574.87	5.40735	-0.221099	0.214595	0.0238459	-0.0148605	-0.0217326
575.22	5.41258	-0.219034	0.214202	0.0237888	-0.0148466	-0.0217329
575.57	5.41762	-0.216954	0.2138	0.0237305	-0.0148321	-0.0217326
575.91	5.42247	-0.214859	0.213389	0.0236709	-0.0148169	-0.0217316
576.26	5.42713	-0.212748	0.212967	0.0236102	-0.0148011	-0.0217299
576.61	5.4316	-0.210621	0.212537	0.0235481	-0.0147846	-0.0217275
576.96	5.43588	-0.20848	0.212096	0.0234848	-0.0147675	-0.0217245
577.3	5.43996	-0.206322	0.211645	0.0234202	-0.0147498	-0.0217207
577.65	5.44386	-0.204149	0.211185	0.0233544	-0.0147314	-0.0217162
578	5.44756	-0.201959	0.210715	0.0232873	-0.0147123	-0.0217111
578.36	5.45107	-0.199754	0.210235	0.0232189	-0.0146926	-0.0217052
578.71	5.45439	-0.197533	0.209745	0.0231493	-0.0146722	-0.0216986
579.07	5.45751	-0.195296	0.209246	0.0230783	-0.0146512	-0.0216914
579.43	5.46043	-0.193043	0.208736	0.0230061	-0.0146295	-0.0216834
579.79	5.46316	-0.190774	0.208216	0.0229326	-0.0146072	-0.0216747
580.16	5.46569	-0.188488	0.207686	0.0228577	-0.0145841	-0.0216653
580.53	5.46802	-0.186186	0.207146	0.0227815	-0.0145604	-0.0216551
580.9	5.47015	-0.183868	0.206596	0.0227041	-0.014536	-0.0216442
581.25	5.47208	-0.181533	0.206035	0.0226252	-0.014511	-0.0216326
581.61	5.4738	-0.179182	0.205464	0.0225451	-0.0144852	-0.0216203
581.96	5.47532	-0.176815	0.204883	0.0224636	-0.0144588	-0.0216072
582.31	5.47663	-0.17443	0.204291	0.0223807	-0.0144316	-0.0215934
582.66	5.47773	-0.172029	0.203689	0.0222965	-0.0144038	-0.0215788
583.01	5.47862	-0.169612	0.203076	0.0222109	-0.0143752	-0.0215634
583.35	5.47929	-0.167177	0.202452	0.0221239	-0.014346	-0.0215473
583.69	5.47975	-0.164726	0.201818	0.0220355	-0.014316	-0.0215304
584.03	5.48	-0.162258	0.201173	0.0219457	-0.0142853	-0.0215128
584.38	5.48002	-0.159773	0.200516	0.0218546	-0.0142538	-0.0214943
584.72	5.47982	-0.157272	0.199849	0.021762	-0.0142216	-0.0214751
585.06	5.4794	-0.154753	0.199171	0.0216679	-0.0141887	-0.021455
585.4	5.47875	-0.152217	0.198482	0.0215725	-0.0141551	-0.0214342
585.75	5.47788	-0.149664	0.197781	0.0214756	-0.0141207	-0.0214125
586.09	5.47679	-0.147094	0.19707	0.0213773	-0.0140855	-0.0213901
586.44	5.47546	-0.144506	0.196347	0.0212775	-0.0140496	-0.0213668
586.79	5.47391	-0.141901	0.195613	0.0211762	-0.0140129	-0.0213428
587.15	5.47214	-0.139279	0.194868	0.0210735	-0.0139755	-0.0213179
587.51	5.47013	-0.136639	0.194111	0.0209693	-0.0139373	-0.0212922
587.87	5.46789	-0.133982	0.193343	0.0208637	-0.0138984	-0.0212656
588.24	5.46541	-0.131307	0.192563	0.0207565	-0.0138586	-0.0212382
588.61	5.4627	-0.128614	0.191772	0.0206478	-0.0138181	-0.02121
588.97	5.45975	-0.125903	0.190968	0.0205377	-0.0137768	-0.021181
589.32	5.45657	-0.123174	0.190154	0.020426	-0.0137347	-0.0211511
589.67	5.45314	-0.120428	0.189327	0.0203128	-0.0136919	-0.0211203
590.03	5.44948	-0.117663	0.188489	0.0201981	-0.0136482	-0.0210887
590.38	5.44557	-0.114881	0.187639	0.0200818	-0.0136037	-0.0210562
590.73	5.44142	-0.11208	0.186776	0.019964	-0.0135585	-0.0210229
591.08	5.43702	-0.109261	0.185902	0.0198446	-0.0135124	-0.0209887
591.43	5.43238	-0.106424	0.185016	0.0197237	-0.0134655	-0.0209536
591.79	5.4275	-0.103568	0.184118	0.0196012	-0.0134178	-0.0209176
592.14	5.42236	-0.100694	0.183208	0.0194771	-0.0133693	-0.0208808
592.5	5.41697	-0.0978022	0.182285	0.0193515	-0.01332	-0.0208431
592.85	5.41133	-0.0948918	0.18135	0.0192243	-0.0132698	-0.0208045
593.21	5.40544	-0.0919629	0.180403	0.0190955	-0.0132189	-0.020765
593.56	5.3993	-0.0890156	0.179444	0.0189651	-0.0131671	-0.0207245
593.91	5.3929	-0.0860498	0.178472	0.0188331	-0.0131144	-0.0206832
594.27	5.38625	-0.0830655	0.177488	0.0186996	-0.0130609	-0.020641
594.63	5.37935	-0.0800626	0.176492	0.0185644	-0.0130066	-0.0205979
594.99	5.37219	-0.0770411	0.175483	0.0184276	-0.0129515	-0.0205539
595.34	5.36478	-0.074001	0.174462	0.0182893	-0.0128955	-0.020509
595.69	5.35711	-0.0709423	0.173428	0.0181493	-0.0128387	-0.0204632
596.03	5.34919	-0.0678649	0.172382	0.0180077	-0.0127811	-0.0204165
596.38	5.34101	-0.0647688	0.171324	0.0178646	-0.0127226	-0.0203689
596.73	5.33257	-0.0616541	0.170253	0.0177198	-0.0126633	-0.0203203
597.08	5.32388	-0.0585206	0.16917	0.0175734	-0.0126031	-0.0202708
597.43	5.31492	-0.0553685	0.168074	0.0174254	-0.0125421	-0.0202205
597.78	5.3057	-0.0521976	0.166965	0.0172757	-0.0124802	-0.0201692
598.14	5.29622	-0.0490079	0.165844	0.0171244	-0.0124174	-0.0201169
598.5	5.28648	-0.0457996	0.16471	0.0169715	-0.0123539	-0.0200638
598.85	5.27647	-0.0425725	0.163564	0.016817	-0.0122894	-0.0200096
599.2	5.2662	-0.0393266	0.162405	0.0166608	-0.0122241	-0.0199546
599.55	5.25566	-0.0360621	0.161233	0.016503	-0.0121579	-0.0198986
599.89	5.24486	-0.032779	0.160048	0.0163436	-0.0120909	-0.0198417
600.23	5.23378	-0.0294771	0.15885	0.0161825	-0.0120229	-0.0197839
600.57	5.22244	-0.0261567	0.15764	0.0160198	-0.0119542	-0.0197251
600.91	5.21083	-0.0228178	0.156417	0.0158554	-0.0118845	-0.0196653
601.24	5.19895	-0.0194603	0.155181	0.0156894	-0.011814	-0.0196046
601.57	5.18679	-0.0160842	0.153933	0.0155218	-0.0117426	-0.0195429
601.91	5.17437	-0.0126897	0.152671	0.0153525	-0.0116703	-0.0194803
602.24	5.16167	-0.00927656	0.151397	0.0151815	-0.0115971	-0.0194167
602.57	5.1487	-0.00584494	0.150109	0.0150089	-0.0115231	-0.0193522
602.91	5.13545	-0.0023948	0.148809	0.0148347	-0.0114482	-0.0192867
603.24	5.12194	0.00107388	0.147496	0.0146588	-0.0113724	-0.0192203
603.58	5.10815	0.00456109	0.146171	0.0144813	-0.0112957	-0.0191529
603.92	5.09409	0.00806684	0.144832	0.0143022	-0.0112181	-0.0190845
604.26	5.07976	0.0115911	0.14348	0.0141214	-0.0111397	-0.0190152
604.6	5.06515	0.0151339	0.142116	0.013939	-0.0110604	-0.0189449
604.95	5.05027	0.0186953	0.140739	0.0137549	-0.0109802	-0.0188737
605.3	5.03512	0.0222751	0.139349	0.0135692	-0.0108991	-0.0188014
605.65	5.01969	0.0258735	0.137946	0.0133818	-0.0108172	-0.0187283
606	5.00399	0.0294905	0.13653	0.0131928	-0.0107343	-0.0186541
606.36	4.98801	0.033126	0.135101	0.0130021	-0.0106506	-0.018579
606.7	4.97177	0.0367801	0.13366	0.0128098	-0.010566	-0.018503
607.05	4.95524	0.0404528	0.132205	0.0126159	-0.0104805	-0.0184259
607.39	4.93845	0.0441441	0.130738	0.0124203	-0.0103942	-0.0183479
607.72	4.92138	0.0478538	0.129258	0.0122231	-0.0103069	-0.018269
608.06	4.90404	0.051582	0.127765	0.0120242	-0.0102188	-0.018189
608.39	4.88643	0.0553286	0.126259	0.0118237	-0.0101298	-0.0181081
608.72	4.86854	0.0590936	0.12474	0.0116216	-0.0100399	-0.0180263
609.05	4.85039	0.0628768	0.123209	0.0114179	-0.00994919	-0.0179435
609.38	4.83196	0.0666783	0.121665	0.0112126	-0.00985757	-0.0178597
609.71	4.81326	0.070498	0.120108	0.0110057	-0.00976508	-0.017775
610.03	4.7943	0.0743359	0.118539	0.0107971	-0.00967172	-0.0176893
610.36	4.77506	0.078192	0.116957	0.010587	-0.0095775	-0.0176027
610.69	4.75556	0.0820662	0.115363	0.0103752	-0.00948242	-0.0175151
611.02	4.73579	0.0859585	0.113756	0.0101619	-0.00938647	-0.0174266
611.35	4.71575	0.0898688	0.112137	0.00994701	-0.00928967	-0.0173371
611.69	4.69546	0.0937971	0.110505	0.00973054	-0.00919202	-0.0172467
612.02	4.6749	0.0977434	0.108861	0.0095125	-0.00909352	-0.0171553
612.36	4.65407	0.101708	0.107204	0.00929291	-0.00899418	-0.0170631
612.7	4.63299	0.10569	0.105536	0.00907175	-0.00889399	-0.0169698
613.04	4.61164	0.109689	0.103855	0.00884905	-0.00879295	-0.0168757
613.39	4.59003	0.113707	0.102161	0.00862479	-0.00869107	-0.0167806
613.73	4.56816	0.117742	0.100456	0.00839899	-0.00858834	-0.0166846
614.06	4.54603	0.121795	0.0987381	0.00817164	-0.00848478	-0.0165876
614.4	4.52364	0.125866	0.0970082	0.00794275	-0.00838037	-0.0164897
614.73	4.50098	0.129955	0.095266	0.00771232	-0.00827512	-0.0163909
615.07	4.47806	0.134061	0.0935116	0.00748036	-0.00816902	-0.0162911
615.41	4.45489	0.138184	0.091745	0.00724686	-0.00806209	-0.0161904
615.75	4.43145	0.142325	0.0899663	0.00701183	-0.00795431	-0.0160888
616.09	4.40775	0.146483	0.0881755	0.00677528	-0.0078457	-0.0159863
616.44	4.38379	0.150659	0.0863726	0.00653721	-0.00773625	-0.0158828
616.8	4.35957	0.154852	0.0845575	0.00629762	-0.00762596	-0.0157783
617.15	4.33508	0.159062	0.0827303	0.00605651	-0.00751482	-0.015673
617.5	4.31033	0.163289	0.080891	0.00581388	-0.00740284	-0.0155667
617.85	4.28531	0.167534	0.0790396	0.00556975	-0.00729003	-0.0154594
618.2	4.26004	0.171795	0.0771761	0.0053241	-0.00717637	-0.0153513
618.55	4.2345	0.176074	0.0753006	0.00507695	-0.00706187	-0.0152421
618.89	4.20869	0.180369	0.073413	0.00482829	-0.00694653	-0.0151321
619.24	4.18263	0.184681	0.0715134	0.00457813	-0.00683035	-0.0150211
619.57	4.1563	0.18901	0.0696018	0.00432648	-0.00671334	-0.0149092
619.91	4.12971	0.193356	0.0676783	0.00407335	-0.00659549	-0.0147963
620.24	4.10286	0.197719	0.0657429	0.00381873	-0.00647682	-0.0146825
620.58	4.07575	0.202098	0.0637955	0.00356262	-0.00635731	-0.0145678
620.91	4.04837	0.206494	0.0618362	0.00330503	-0.00623696	-0.0144521
621.25	4.02073	0.210907	0.0598649	0.00304596	-0.00611578	-0.0143355
621.58	3.99283	0.215336	0.0578817	0.0027854	-0.00599376	-0.014218
621.92	3.96467	0.219782	0.0558866	0.00252337	-0.0058709	-0.0140995
622.27	3.93624	0.224245	0.0538795	0.00225985	-0.0057472	-0.0139801
622.62	3.90754	0.228724	0.0518604	0.00199485	-0.00562267	-0.0138598
622.97	3.87858	0.233219	0.0498294	0.00172837	-0.00549729	-0.0137384
623.33	3.84935	0.237731	0.0477865	0.00146042	-0.00537108	-0.0136162
623.68	3.81986	0.242259	0.0457317	0.00119099	-0.00524403	-0.013493
624.02	3.79011	0.246804	0.0436651	0.000920112	-0.00511614	-0.0133689
624.36	3.76009	0.251364	0.0415866	0.000647772	-0.00498742	-0.0132438
624.7	3.72981	0.255941	0.0394964	0.000373982	-0.00485787	-0.0131178
625.03	3.69926	0.260534	0.0373944	9.87499e-05	-0.00472749	-0.0129908
625.36	3.66846	0.265142	0.0352807	-0.000177918	-0.00459629	-0.012863
625.69	3.63738	0.269766	0.0331554	-0.000456013	-0.00446425	-0.0127341
626.01	3.60605	0.274406	0.0310185	-0.000735525	-0.0043314	-0.0126044
626.34	3.57446	0.279062	0.0288701	-0.00101645	-0.00419772	-0.0124737
626.66	3.5426	0.283733	0.0267102	-0.00129877	-0.00406323	-0.0123421
626.98	3.51049	0.288419	0.0245389	-0.00158249	-0.00392793	-0.0122096
627.3	3.47812	0.29312	0.0223563	-0.00186758	-0.00379183	-0.0120762
627.62	3.4455	0.297837	0.0201625	-0.00215403	-0.00365492	-0.0119418
627.94	3.41262	0.302568	0.0179576	-0.00244183	-0.00351722	-0.0118066
628.26	3.3795	0.307314	0.0157416	-0.00273097	-0.00337873	-0.0116704
628.58	3.34612	0.312075	0.0135147	-0.00302144	-0.00323946	-0.0115333
628.91	3.31249	0.31685	0.0112768	-0.00331322	-0.0030994	-0.0113954
629.23	3.27861	0.32164	0.00902805	-0.00360632	-0.00295856	-0.0112566
629.55	3.24448	0.326444	0.00676844	-0.00390072	-0.00281694	-0.0111168
629.88	3.2101	0.331263	0.00449803	-0.00419642	-0.00267455	-0.0109762
630.21	3.17547	0.336095	0.00221684	-0.00449342	-0.00253137	-0.0108347
630.54	3.14059	0.340942	-7.51222e-05	-0.0047917	-0.00238742	-0.0106923
630.88	3.10546	0.345802	-0.00237779	-0.00509126	-0.0022427	-0.010549
631.22	3.07008	0.350677	-0.0046911	-0.00539209	-0.0020972	-0.0104048
631.55	3.03446	0.355564	-0.00701496	-0.00569418	-0.00195094	-0.0102597
631.87	2.99859	0.360466	-0.00934927	-0.00599751	-0.00180391	-0.0101137
632.2	2.96247	0.36538	-0.011694	-0.00630206	-0.00165613	-0.0099669
632.53	2.92611	0.370308	-0.0140491	-0.00660785	-0.0015076	-0.0098192
632.85	2.8895	0.375249	-0.0164144	-0.00691484	-0.00135831	-0.00967063
633.17	2.85265	0.380202	-0.01879	-0.00722303	-0.00120827	-0.00952118
633.5	2.81556	0.385169	-0.0211757	-0.00753242	-0.00105748	-0.00937087
633.82	2.77823	0.390147	-0.0235716	-0.00784299	-0.000905955	-0.00921969
634.13	2.74065	0.395139	-0.0259774	-0.00815472	-0.000753687	-0.00906766
634.45	2.70283	0.400142	-0.0283933	-0.00846763	-0.00060068	-0.00891476
634.77	2.66477	0.405158	-0.0308191	-0.00878168	-0.00044694	-0.00876101
635.08	2.62647	0.410186	-0.0332548	-0.00909688	-0.000292471	-0.0086064
635.4	2.58794	0.415226	-0.0357001	-0.0094132	-0.00013728	-0.00845095
635.71	2.54917	0.420278	-0.0381552	-0.00973064	1.86276e-05	-0.00829466
636.03	2.51017	0.425341	-0.0406198	-0.0100492	0.00017525	-0.00813753
636.35	2.47093	0.430416	-0.043094	-0.0103688	0.000332585	-0.00797956
636.66	2.43146	0.435503	-0.0455777	-0.0106896	0.000490629	-0.00782076
636.98	2.39176	0.440601	-0.0480709	-0.0110114	0.000649381	-0.00766112
637.3	2.35182	0.445711	-0.0505735	-0.0113343	0.000808839	-0.00750066
637.63	2.31166	0.450831	-0.0530855	-0.0116582	0.000969	-0.00733936
637.95	2.27126	0.455963	-0.0556069	-0.0119833	0.00112986	-0.00717723
638.27	2.23063	0.461106	-0.0581376	-0.0123094	0.00129143	-0.00701427
638.6	2.18977	0.466261	-0.0606776	-0.0126365	0.00145369	-0.00685049
638.92	2.14868	0.471426	-0.0632269	-0.0129647	0.00161665	-0.00668588
639.24	2.10736	0.476602	-0.0657853	-0.013294	0.0017803	-0.00652046
639.57	2.06582	0.481789	-0.0683527	-0.0136242	0.00194463	-0.00635422
639.89	2.02405	0.486986	-0.0709291	-0.0139555	0.00210964	-0.00618717
640.23	1.98205	0.492194	-0.0735145	-0.0142878	0.00227532	-0.00601931
640.56	1.93984	0.497413	-0.0761087	-0.014621	0.00244168	-0.00585065
640.9	1.8974	0.502641	-0.0787116	-0.0149552	0.0026087	-0.0056812
641.25	1.85475	0.50788	-0.0813232	-0.0152904	0.00277639	-0.00551095
641.59	1.81188	0.513128	-0.0839434	-0.0156266	0.00294473	-0.00533991
641.93	1.76879	0.518387	-0.0865721	-0.0159637	0.00311372	-0.00516809
642.26	1.72548	0.523656	-0.0892093	-0.0163017	0.00328336	-0.00499549
642.6	1.68196	0.528934	-0.0918549	-0.0166406	0.00345364	-0.00482211
642.94	1.63823	0.534222	-0.0945088	-0.0169805	0.00362456	-0.00464796
643.27	1.59429	0.539519	-0.0971708	-0.0173212	0.0037961	-0.00447305
643.59	1.55015	0.544826	-0.099841	-0.0176628	0.00396828	-0.00429738
643.91	1.5058	0.550143	-0.102519	-0.0180053	0.00414106	-0.00412096
644.23	1.46124	0.555468	-0.105205	-0.0183487	0.00431447	-0.00394379
644.55	1.41649	0.560803	-0.107899	-0.0186929	0.00448848	-0.00376587
644.87	1.37153	0.566147	-0.110601	-0.0190379	0.0046631	-0.00358721
645.19	1.32637	0.5715	-0.113311	-0.0193838	0.00483833	-0.00340781
645.51	1.281	0.576862	-0.116028	-0.0197305	0.00501415	-0.00322767
645.83	1.23545	0.582232	-0.118753	-0.020078	0.00519057	-0.0030468
646.15	1.18969	0.587611	-0.121486	-0.0204264	0.00536758	-0.00286519
646.48	1.14373	0.592999	-0.124226	-0.0207755	0.00554519	-0.00268285
646.81	1.09758	0.598395	-0.126974	-0.0211254	0.00572339	-0.00249979
647.15	1.05123	0.6038	-0.129729	-0.0214761	0.00590217	-0.002316
647.5	1.00468	0.609213	-0.132491	-0.0218276	0.00608153	-0.00213149
647.85	0.957949	0.614634	-0.135261	-0.0221799	0.00626146	-0.00194627
648.2	0.91102	0.620063	-0.138038	-0.0225328	0.00644197	-0.00176033
648.54	0.863901	0.6255	-0.140822	-0.0228866	0.00662304	-0.00157368
648.87	0.81659	0.630945	-0.143613	-0.023241	0.00680468	-0.00138633
649.2	0.76909	0.636397	-0.146411	-0.0235962	0.00698688	-0.00119827
649.52	0.7214	0.641857	-0.149217	-0.023952	0.00716964	-0.0010095
649.84	0.673523	0.647324	-0.152029	-0.0243086	0.00735296	-0.000820039
650.16	0.625458	0.652799	-0.154848	-0.0246659	0.00753683	-0.000629877
650.47	0.577208	0.658281	-0.157674	-0.0250239	0.00772124	-0.00043902
650.78	0.528772	0.66377	-0.160506	-0.0253825	0.00790621	-0.000247473
651.1	0.480154	0.669266	-0.163345	-0.0257418	0.00809171	-5.52394e-05
651.41	0.431354	0.674769	-0.166191	-0.0261018	0.00827775	0.000137676
651.73	0.382373	0.68028	-0.169044	-0.0264624	0.00846432	0.000331272
652.05	0.333213	0.685797	-0.171903	-0.0268236	0.00865142	0.000525547
652.37	0.283872	0.691321	-0.174768	-0.0271855	0.00883906	0.000720498
652.7	0.234353	0.696853	-0.17764	-0.0275481	0.00902721	0.000916124
653.03	0.184656	0.70239	-0.180518	-0.0279112	0.0092159	0.00111242
653.37	0.134781	0.707935	-0.183403	-0.028275	0.0094051	0.0013094
653.72	0.0847293	0.713486	-0.186294	-0.0286394	0.00959482	0.00150704
654.07	0.0345006	0.719044	-0.189191	-0.0290044	0.00978507	0.00170535
654.41	-0.0159038	0.724608	-0.192095	-0.02937	0.00997583	0.00190433
654.74	-0.0664829	0.730179	-0.195005	-0.0297362	0.0101671	0.00210397
655.07	-0.117235	0.735756	-0.197921	-0.030103	0.0103589	0.00230428
655.39	-0.168157	0.741339	-0.200843	-0.0304703	0.0105511	0.00250523
655.71	-0.21925	0.746928	-0.203771	-0.0308382	0.0107439	0.00270684
656.02	-0.27051	0.752524	-0.206704	-0.0312067	0.0109372	0.00290909
656.34	-0.321938	0.758125	-0.209644	-0.0315757	0.0111309	0.00311198
656.65	-0.373529	0.763731	-0.212589	-0.0319452	0.0113252	0.0033155
656.96	-0.425284	0.769343	-0.21554	-0.0323152	0.0115199	0.00351965
657.27	-0.477199	0.774961	-0.218496	-0.0326857	0.011715	0.00372443
657.59	-0.529273	0.780583	-0.221457	-0.0330566	0.0119107	0.00392982
657.9	-0.581503	0.786211	-0.224424	-0.033428	0.0121067	0.00413582
658.22	-0.633888	0.791843	-0.227396	-0.0337999	0.0123033	0.00434242
658.54	-0.686424	0.797481	-0.230373	-0.0341722	0.0125002	0.00454962
658.87	-0.739108	0.803122	-0.233354	-0.0345448	0.0126976	0.0047574
659.21	-0.791937	0.808769	-0.236341	-0.0349179	0.0128954	0.00496575
659.55	-0.844909	0.814419	-0.239332	-0.0352913	0.0130936	0.00517468
659.89	-0.898021	0.820073	-0.242327	-0.035665	0.0132922	0.00538417
660.24	-0.951271	0.825732	-0.245327	-0.0360391	0.0134913	0.00559421
660.57	-1.00466	0.831393	-0.248331	-0.0364135	0.0136907	0.0058048
660.9	-1.05818	0.837059	-0.251339	-0.0367882	0.0138904	0.00601593
661.22	-1.11183	0.842727	-0.254351	-0.0371631	0.0140906	0.00622759
661.54	-1.16561	0.848399	-0.257367	-0.0375383	0.0142911	0.00643979
661.85	-1.21952	0.854074	-0.260387	-0.0379138	0.014492	0.00665251
662.16	-1.27356	0.859751	-0.263411	-0.0382895	0.0146932	0.00686575
662.47	-1.32772	0.865431	-0.266438	-0.0386654	0.0148948	0.0070795
662.78	-1.382	0.871114	-0.269468	-0.0390415	0.0150967	0.00729374
663.09	-1.4364	0.876798	-0.272501	-0.0394177	0.015299	0.00750847
663.39	-1.49091	0.882484	-0.275538	-0.0397941	0.0155015	0.00772368
663.7	-1.54554	0.888172	-0.278577	-0.0401705	0.0157044	0.00793936
664.02	-1.60027	0.893861	-0.28162	-0.0405471	0.0159075	0.00815551
664.33	-1.65511	0.899551	-0.284664	-0.0409237	0.016111	0.0083721
664.65	-1.71005	0.905242	-0.287711	-0.0413004	0.0163147	0.00858913
664.97	-1.76509	0.910933	-0.29076	-0.041677	0.0165187	0.0088066
665.3	-1.82022	0.916625	-0.293812	-0.0420537	0.0167229	0.00902449
665.63	-1.87546	0.922317	-0.296865	-0.0424304	0.0169274	0.0092428
665.97	-1.93078	0.928008	-0.29992	-0.042807	0.0171322	0.00946153
666.31	-1.98619	0.9337	-0.302977	-0.0431835	0.0173371	0.00968065
666.64	-2.04169	0.939391	-0.306036	-0.04356	0.0175423	0.00990016
666.96	-2.09727	0.945082	-0.309095	-0.0439364	0.0177477	0.01012
667.28	-2.15293	0.950772	-0.312156	-0.0443126	0.0179533	0.0103403
667.59	-2.20867	0.956461	-0.315219	-0.0446887	0.0181591	0.0105609
667.9	-2.26449	0.962149	-0.318282	-0.0450646	0.0183651	0.0107819
668.21	-2.32037	0.967835	-0.321346	-0.0454404	0.0185712	0.0110033
668.51	-2.37633	0.97352	-0.324411	-0.045816	0.0187776	0.011225
668.82	-2.43235	0.979204	-0.327476	-0.0461913	0.0189841	0.011447
669.12	-2.48844	0.984886	-0.330542	-0.0465665	0.0191907	0.0116693
669.43	-2.5446	0.990566	-0.333609	-0.0469414	0.0193975	0.011892
669.73	-2.60081	0.996245	-0.336675	-0.0473161	0.0196045	0.012115
670.04	-2.65709	1.00192	-0.339743	-0.0476905	0.0198116	0.0123383
670.35	-2.71342	1.00759	-0.34281	-0.0480646	0.0200188	0.012562
670.67	-2.7698	1.01327	-0.345877	-0.0484384	0.0202262	0.0127859
670.98	-2.82623	1.01893	-0.348944	-0.0488118	0.0204336	0.01301
671.31	-2.8827	1.0246	-0.35201	-0.0491849	0.0206411	0.0132345
671.64	-2.93922	1.03026	-0.355075	-0.0495576	0.0208487	0.0134592
671.98	-2.99577	1.03592	-0.35814	-0.0499299	0.0210564	0.0136841
672.31	-3.05235	1.04158	-0.361204	-0.0503017	0.0212642	0.0139093
672.64	-3.10897	1.04723	-0.364266	-0.050673	0.0214719	0.0141347
672.96	-3.16561	1.05287	-0.367327	-0.0510438	0.0216798	0.0143604
673.28	-3.22227	1.05852	-0.370387	-0.0514142	0.0218876	0.0145862
673.59	-3.27896	1.06415	-0.373445	-0.051784	0.0220955	0.0148122
673.9	-3.33566	1.06979	-0.376501	-0.0521532	0.0223033	0.0150384
674.2	-3.39237	1.07541	-0.379555	-0.0525218	0.0225112	0.0152648
674.5	-3.44909	1.08104	-0.382607	-0.0528898	0.022719	0.0154913
674.81	-3.50581	1.08665	-0.385656	-0.0532572	0.0229268	0.015718
675.11	-3.56253	1.09227	-0.388703	-0.053624	0.0231346	0.0159448
675.41	-3.61925	1.09787	-0.391747	-0.05399	0.0233423	0.0161717
675.71	-3.67597	1.10347	-0.394789	-0.0543553	0.0235499	0.0163988
676.02	-3.73268	1.10906	-0.397827	-0.0547199	0.0237575	0.0166259
676.33	-3.78938	1.11465	-0.400862	-0.0550838	0.0239649	0.0168532
676.64	-3.84606	1.12023	-0.403894	-0.0554468	0.0241723	0.0170805
676.96	-3.90273	1.1258	-0.406922	-0.0558091	0.0243796	0.017308
677.28	-3.95938	1.13137	-0.409947	-0.0561707	0.0245868	0.0175355
677.6	-4.01602	1.13693	-0.412968	-0.0565314	0.0247939	0.0177631
677.94	-4.07263	1.14248	-0.415986	-0.0568912	0.0250009	0.0179908
678.27	-4.12921	1.14802	-0.418999	-0.0572502	0.0252077	0.0182185
678.6	-4.18576	1.15356	-0.422009	-0.0576083	0.0254144	0.0184463
678.92	-4.24228	1.15908	-0.425014	-0.0579655	0.025621	0.0186741
679.23	-4.29877	1.1646	-0.428014	-0.0583217	0.0258274	0.0189019
679.54	-4.35523	1.17011	-0.431011	-0.058677	0.0260336	0.0191298
679.85	-4.41164	1.17561	-0.434002	-0.0590313	0.0262396	0.0193576
680.15	-4.46801	1.1811	-0.436989	-0.0593847	0.0264455	0.0195855
680.45	-4.52434	1.18659	-0.43997	-0.059737	0.0266512	0.0198134
680.75	-4.58062	1.19206	-0.442947	-0.0600883	0.0268566	0.0200412
681.05	-4.63686	1.19752	-0.445918	-0.0604386	0.0270619	0.0202691
681.34	-4.69305	1.20298	-0.448885	-0.0607878	0.027267	0.0204969
681.64	-4.74918	1.20842	-0.451846	-0.0611359	0.0274718	0.0207247
681.94	-4.80527	1.21385	-0.454801	-0.0614829	0.0276764	0.0209525
682.24	-4.86129	1.21928	-0.457751	-0.0618289	0.0278808	0.0211802
682.55	-4.91726	1.22469	-0.460695	-0.0621737	0.028085	0.0214079
682.86	-4.97317	1.23009	-0.463633	-0.0625173	0.0282889	0.0216356
683.17	-5.02902	1.23548	-0.466565	-0.0628599	0.0284926	0.0218632
683.5	-5.0848	1.24086	-0.469492	-0.0632012	0.028696	0.0220907
683.84	-5.14053	1.24623	-0.472412	-0.0635414	0.0288991	0.0223182
684.18	-5.19619	1.25159	-0.475326	-0.0638805	0.029102	0.0225456
684.51	-5.25179	1.25694	-0.478235	-0.0642183	0.0293047	0.022773
684.83	-5.30733	1.26228	-0.481137	-0.064555	0.0295071	0.0230003
685.16	-5.3628	1.2676	-0.484032	-0.0648904	0.0297092	0.0232275
685.48	-5.4182	1.27291	-0.486922	-0.0652247	0.029911	0.0234547
685.79	-5.47353	1.27822	-0.489805	-0.0655576	0.0301126	0.0236817
686.11	-5.52879	1.2835	-0.492681	-0.0658893	0.0303139	0.0239087
686.42	-5.58397	1.28878	-0.495551	-0.0662198	0.0305148	0.0241356
686.74	-5.63908	1.29405	-0.498413	-0.0665489	0.0307155	0.0243624
687.05	-5.6941	1.2993	-0.501269	-0.0668767	0.0309158	0.0245891
687.36	-5.74905	1.30454	-0.504117	-0.0672031	0.0311158	0.0248156
687.67	-5.80391	1.30976	-0.506958	-0.0675282	0.0313155	0.025042
687.98	-5.85868	1.31497	-0.509791	-0.0678519	0.0315149	0.0252683
688.3	-5.91337	1.32017	-0.512617	-0.0681742	0.0317139	0.0254945
688.61	-5.96797	1.32535	-0.515435	-0.0684951	0.0319125	0.0257205
688.92	-6.02247	1.33052	-0.518246	-0.0688145	0.0321108	0.0259463
689.24	-6.07687	1.33568	-0.521048	-0.0691324	0.0323087	0.026172
689.56	-6.13117	1.34082	-0.523842	-0.0694489	0.0325062	0.0263975
689.88	-6.18537	1.34595	-0.526627	-0.0697638	0.0327034	0.0266228
690.2	-6.23946	1.35106	-0.529405	-0.0700772	0.0329001	0.0268479
690.53	-6.29345	1.35616	-0.532173	-0.0703891	0.0330964	0.0270728
690.86	-6.34733	1.36124	-0.534933	-0.0706993	0.0332923	0.0272975
691.2	-6.40109	1.3663	-0.537684	-0.071008	0.0334878	0.027522
691.53	-6.45475	1.37135	-0.540426	-0.0713151	0.0336828	0.0277463
691.86	-6.50829	1.37638	-0.543159	-0.0716205	0.0338774	0.0279704
692.18	-6.56173	1.3814	-0.545883	-0.0719244	0.0340716	0.0281942
692.51	-6.61505	1.3864	-0.548598	-0.0722266	0.0342654	0.0284179
692.82	-6.66825	1.39138	-0.551303	-0.0725271	0.0344587	0.0286413
693.14	-6.72134	1.39635	-0.554	-0.072826	0.0346515	0.0288645
693.46	-6.77431	1.4013	-0.556686	-0.0731231	0.0348439	0.0290874
693.77	-6.82715	1.40623	-0.559363	-0.0734186	0.0350359	0.0293101
694.08	-6.87988	1.41115	-0.562031	-0.0737123	0.0352273	0.0295325
694.39	-6.93248	1.41605	-0.564688	-0.0740043	0.0354183	0.0297547
694.7	-6.98495	1.42093	-0.567335	-0.0742945	0.0356088	0.0299766
695.01	-7.0373	1.42579	-0.569973	-0.0745829	0.0357988	0.0301983
695.32	-7.08952	1.43063	-0.5726	-0.0748695	0.0359883	0.0304196
695.63	-7.1416	1.43545	-0.575216	-0.0751542	0.0361773	0.0306407
695.94	-7.19356	1.44026	-0.577823	-0.0754372	0.0363658	0.0308615
696.26	-7.24539	1.44504	-0.580419	-0.0757183	0.0365538	0.0310821
696.57	-7.29708	1.44981	-0.583004	-0.0759975	0.0367413	0.0313023
696.89	-7.34863	1.45456	-0.585578	-0.0762748	0.0369282	0.0315222
697.21	-7.40003	1.45928	-0.588142	-0.0765502	0.0371146	0.0317418
697.53	-7.4513	1.46399	-0.590694	-0.0768237	0.0373005	0.0319611
697.85	-7.50242	1.46868	-0.593235	-0.0770952	0.0374858	0.0321801
698.18	-7.5534	1.47335	-0.595765	-0.0773648	0.0376705	0.0323987
698.52	-7.60424	1.47799	-0.598284	-0.0776323	0.0378547	0.032617
698.85	-7.65492	1.48262	-0.600791	-0.0778979	0.0380383	0.032835
699.19	-7.70546	1.48722	-0.603287	-0.0781615	0.0382214	0.0330527
699.54	-7.75584	1.49181	-0.605771	-0.0784231	0.0384039	0.03327
699.88	-7.80608	1.49637	-0.608243	-0.0786827	0.0385858	0.0334869
700.21	-7.85616	1.50091	-0.610704	-0.0789403	0.0387671	0.0337036
700.54	-7.90609	1.50543	-0.613153	-0.0791958	0.0389478	0.0339198
700.87	-7.95587	1.50993	-0.61559	-0.0794492	0.039128	0.0341357
701.2	-8.00548	1.51441	-0.618015	-0.0797005	0.0393075	0.0343512
701.52	-8.05494	1.51886	-0.620428	-0.0799497	0.0394864	0.0345664
701.84	-8.10423	1.5233	-0.622828	-0.0801968	0.0396647	0.0347812
702.16	-8.15335	1.52771	-0.625216	-0.0804417	0.0398424	0.0349956
702.47	-8.20231	1.5321	-0.627591	-0.0806845	0.0400194	0.0352096
702.79	-8.2511	1.53646	-0.629954	-0.0809251	0.0401958	0.0354231
703.11	-8.29971	1.5408	-0.632303	-0.0811635	0.0403716	0.0356363
703.42	-8.34816	1.54512	-0.63464	-0.0813996	0.0405467	0.0358491
703.74	-8.39642	1.54942	-0.636963	-0.0816335	0.0407211	0.0360614
704.05	-8.4445	1.55369	-0.639273	-0.0818651	0.0408948	0.0362733
704.37	-8.4924	1.55794	-0.64157	-0.0820944	0.0410678	0.0364847
704.69	-8.54012	1.56216	-0.643853	-0.0823214	0.0412402	0.0366957
705	-8.58764	1.56636	-0.646122	-0.0825461	0.0414118	0.0369063
705.33	-8.63498	1.57053	-0.648377	-0.0827684	0.0415828	0.0371163
705.65	-8.68211	1.57468	-0.650618	-0.0829884	0.041753	0.0373259
705.97	-8.72906	1.57881	-0.652845	-0.0832059	0.0419224	0.037535
706.3	-8.7758	1.58291	-0.655058	-0.0834211	0.0420912	0.0377436
706.63	-8.82235	1.58698	-0.657256	-0.0836338	0.0422592	0.0379518
706.96	-8.8687	1.59103	-0.65944	-0.0838441	0.0424264	0.0381594
707.29	-8.91485	1.59505	-0.66161	-0.0840519	0.0425929	0.0383665
707.61	-8.96079	1.59905	-0.663765	-0.0842573	0.0427587	0.0385732
707.93	-9.00654	1.60302	-0.665905	-0.0844602	0.0429237	0.0387793
708.25	-9.05208	1.60697	-0.668031	-0.0846607	0.0430879	0.0389849
708.56	-9.09742	1.61089	-0.670142	-0.0848586	0.0432514	0.03919
708.87	-9.14256	1.61478	-0.672238	-0.0850541	0.0434141	0.0393947
709.18	-9.18749	1.61864	-0.674319	-0.085247	0.043576	0.0395987
709.48	-9.23221	1.62248	-0.676385	-0.0854374	0.0437372	0.0398023
709.79	-9.27672	1.62629	-0.678436	-0.0856252	0.0438976	0.0400054
710.09	-9.32103	1.63008	-0.680472	-0.0858105	0.0440572	0.0402079
710.39	-9.36514	1.63384	-0.682492	-0.0859932	0.044216	0.0404099
710.7	-9.40903	1.63757	-0.684497	-0.0861734	0.0443741	0.0406114
711	-9.45272	1.64127	-0.686487	-0.0863509	0.0445313	0.0408124
711.3	-9.4962	1.64494	-0.688462	-0.0865259	0.0446878	0.0410128
711.6	-9.53947	1.64859	-0.690421	-0.0866983	0.0448434	0.0412127
711.91	-9.58252	1.65221	-0.692364	-0.086868	0.0449983	0.0414121
712.21	-9.62537	1.6558	-0.694292	-0.0870351	0.0451524	0.0416109
712.52	-9.66799	1.65936	-0.696204	-0.0871995	0.0453056	0.0418092
712.83	-9.7104	1.66289	-0.6981	-0.0873613	0.045458	0.0420069
713.14	-9.7526	1.6664	-0.69998	-0.0875204	0.0456096	0.0422041
713.45	-9.79458	1.66987	-0.701844	-0.0876768	0.0457604	0.0424007
713.77	-9.83634	1.67332	-0.703693	-0.0878305	0.0459103	0.0425968
714.09	-9.87788	1.67673	-0.705525	-0.0879815	0.0460595	0.0427923
714.41	-9.91921	1.68012	-0.707341	-0.0881299	0.0462078	0.0429872
714.74	-9.96033	1.68348	-0.709141	-0.0882755	0.0463553	0.0431817
715.06	-10.0012	1.68681	-0.710925	-0.0884184	0.0465019	0.0433755
715.37	-10.0419	1.69011	-0.712693	-0.0885585	0.0466477	0.0435688
715.69	-10.0824	1.69338	-0.714444	-0.088696	0.0467927	0.0437616
716	-10.1226	1.69662	-0.716179	-0.0888306	0.0469369	0.0439537
716.31	-10.1626	1.69983	-0.717898	-0.0889625	0.0470802	0.0441454
716.61	-10.2024	1.70301	-0.7196	-0.0890917	0.0472226	0.0443364
716.92	-10.242	1.70616	-0.721285	-0.089218	0.0473642	0.0445269
717.22	-10.2813	1.70927	-0.722953	-0.0893415	0.0475049	0.0447168
717.52	-10.3205	1.71236	-0.724605	-0.0894621	0.0476448	0.0449061
717.82	-10.3594	1.71542	-0.726239	-0.0895799	0.0477838	0.0450948
718.12	-10.398	1.71844	-0.727857	-0.0896948	0.0479219	0.0452829
718.42	-10.4365	1.72143	-0.729457	-0.0898069	0.0480591	0.0454704
718.72	-10.4747	1.72439	-0.731039	-0.089916	0.0481954	0.0456572
719.03	-10.5126	1.72732	-0.732604	-0.0900221	0.0483308	0.0458435
719.33	-10.5503	1.73022	-0.734151	-0.0901253	0.0484653	0.0460291
719.63	-10.5878	1.73308	-0.735681	-0.0902255	0.0485988	0.0462141
719.94	-10.625	1.73591	-0.737192	-0.0903227	0.0487314	0.0463984
720.24	-10.662	1.73871	-0.738684	-0.0904168	0.048863	0.0465821
720.55	-10.6987	1.74147	-0.740158	-0.0905078	0.0489937	0.046765
720.87	-10.7351	1.7442	-0.741613	-0.0905957	0.0491234	0.0469473
721.18	-10.7713	1.7469	-0.74305	-0.0906805	0.0492521	0.0471289
721.5	-10.8072	1.74956	-0.744467	-0.0907622	0.0493798	0.0473098
721.83	-10.8429	1.75218	-0.745865	-0.0908407	0.0495065	0.04749
722.15	-10.8783	1.75477	-0.747245	-0.090916	0.0496322	0.0476694
722.49	-10.9134	1.75733	-0.748604	-0.0909881	0.0497569	0.0478482
722.82	-10.9483	1.75985	-0.749945	-0.091057	0.0498806	0.0480262
723.15	-10.9829	1.76234	-0.751266	-0.0911227	0.0500032	0.0482036
723.47	-11.0172	1.76479	-0.752566	-0.091185	0.0501248	0.0483801
723.79	-11.0512	1.7672	-0.753847	-0.0912441	0.0502453	0.0485559
724.11	-11.085	1.76957	-0.755108	-0.0912998	0.0503648	0.048731
724.43	-11.1185	1.77191	-0.756348	-0.0913522	0.0504832	0.0489052
724.74	-11.1516	1.77422	-0.757567	-0.0914011	0.0506005	0.0490787
725.05	-11.1845	1.77648	-0.758765	-0.0914466	0.0507167	0.0492514
725.36	-11.2171	1.7787	-0.759943	-0.0914887	0.0508318	0.0494232
725.67	-11.2494	1.78089	-0.761099	-0.0915273	0.0509458	0.0495943
725.97	-11.2814	1.78304	-0.762234	-0.0915624	0.0510586	0.0497645
726.28	-11.3131	1.78515	-0.763347	-0.0915939	0.0511703	0.0499339
726.59	-11.3445	1.78722	-0.764439	-0.0916219	0.0512809	0.0501024
726.89	-11.3755	1.78925	-0.765508	-0.0916463	0.0513902	0.0502701
727.2	-11.4063	1.79124	-0.766555	-0.0916671	0.0514984	0.0504369
727.5	-11.4367	1.79319	-0.76758	-0.0916842	0.0516054	0.0506028
727.81	-11.4668	1.7951	-0.768582	-0.0916976	0.0517112	0.0507678
728.12	-11.4966	1.79697	-0.769562	-0.0917073	0.0518157	0.0509319
728.43	-11.526	1.7988	-0.770518	-0.0917133	0.0519191	0.0510951
728.74	-11.5551	1.80059	-0.771451	-0.0917155	0.0520212	0.0512574
729.05	-11.5839	1.80233	-0.772361	-0.0917139	0.052122	0.0514187
729.37	-11.6124	1.80403	-0.773248	-0.0917085	0.0522216	0.0515791
729.69	-11.6405	1.80569	-0.774111	-0.0916993	0.0523199	0.0517385
730.01	-11.6682	1.80731	-0.77495	-0.0916862	0.0524169	0.051897
730.33	-11.6956	1.80889	-0.775765	-0.0916692	0.0525127	0.0520545
730.65	-11.7227	1.81042	-0.776556	-0.0916484	0.0526071	0.052211
730.96	-11.7494	1.81191	-0.777322	-0.0916235	0.0527002	0.0523665
731.27	-11.7757	1.81335	-0.778064	-0.0915947	0.052792	0.052521
731.57	-11.8017	1.81475	-0.778781	-0.0915618	0.0528825	0.0526745
731.87	-11.8273	1.81611	-0.779473	-0.0915249	0.0529715	0.0528269
732.17	-11.8526	1.81742	-0.780139	-0.0914839	0.0530592	0.0529783
732.47	-11.8774	1.81869	-0.780779	-0.0914387	0.0531455	0.0531285
732.77	-11.9019	1.81991	-0.781393	-0.0913894	0.0532304	0.0532777
733.06	-11.9259	1.82108	-0.781981	-0.0913358	0.0533138	0.0534258
733.36	-11.9496	1.8222	-0.782543	-0.0912779	0.0533958	0.0535728
733.65	-11.9729	1.82328	-0.783077	-0.0912158	0.0534763	0.0537186
733.94	-11.9958	1.82432	-0.783585	-0.0911493	0.0535554	0.0538632
734.24	-12.0182	1.8253	-0.784065	-0.0910785	0.0536329	0.0540067
734.53	-12.0403	1.82624	-0.784517	-0.0910032	0.0537089	0.054149
734.82	-12.0619	1.82712	-0.784941	-0.0909234	0.0537834	0.05429
735.12	-12.083	1.82796	-0.785337	-0.0908392	0.0538562	0.0544299
735.41	-12.1038	1.82875	-0.785705	-0.0907504	0.0539276	0.0545684
735.71	-12.1241	1.82949	-0.786043	-0.090657	0.0539973	0.0547058
736.01	-12.1439	1.83018	-0.786353	-0.090559	0.0540654	0.0548418
736.31	-12.1634	1.83081	-0.786633	-0.0904563	0.0541319	0.0549765
736.61	-12.1823	1.8314	-0.786883	-0.0903489	0.0541967	0.05511
736.92	-12.2008	1.83194	-0.787104	-0.0902369	0.0542599	0.0552421
737.23	-12.2189	1.83242	-0.787296	-0.0901201	0.0543215	0.0553729
737.54	-12.2364	1.83285	-0.787457	-0.0899986	0.0543814	0.0555024
737.86	-12.2536	1.83323	-0.787588	-0.0898723	0.0544396	0.0556306
738.17	-12.2702	1.83356	-0.787688	-0.0897412	0.0544962	0.0557574
738.48	-12.2864	1.83384	-0.787758	-0.0896051	0.054551	0.0558828
738.78	-12.3021	1.83406	-0.787797	-0.0894643	0.0546041	0.0560069
739.09	-12.3173	1.83422	-0.787805	-0.0893184	0.0546555	0.0561295
739.39	-12.3321	1.83434	-0.787781	-0.0891677	0.0547051	0.0562508
739.68	-12.3463	1.8344	-0.787726	-0.089012	0.054753	0.0563706
739.98	-12.3601	1.8344	-0.78764	-0.0888512	0.0547991	0.0564891
740.27	-12.3734	1.83435	-0.787521	-0.0886855	0.0548435	0.0566061
740.57	-12.3862	1.83424	-0.787371	-0.0885146	0.054886	0.0567217
740.86	-12.3984	1.83408	-0.787188	-0.0883387	0.0549268	0.0568358
741.15	-12.4102	1.83386	-0.786974	-0.0881577	0.0549658	0.0569485
741.44	-12.4215	1.83359	-0.786726	-0.0879716	0.055003	0.0570597
741.73	-12.4323	1.83326	-0.786446	-0.0877803	0.0550383	0.0571695
742.02	-12.4426	1.83287	-0.786133	-0.0875838	0.0550718	0.0572777
742.32	-12.4523	1.83243	-0.785786	-0.087382	0.0551035	0.0573845
742.61	-12.4616	1.83192	-0.785406	-0.087175	0.0551332	0.0574897
742.9	-12.4703	1.83136	-0.784993	-0.0869628	0.0551612	0.0575935
743.2	-12.4785	1.83075	-0.784547	-0.0867452	0.0551872	0.0576957
743.5	-12.4862	1.83007	-0.784066	-0.0865224	0.0552114	0.0577964
743.8	-12.4934	1.82933	-0.783553	-0.0862943	0.0552337	0.0578956
744.1	-12.5001	1.82854	-0.783005	-0.0860608	0.0552542	0.0579933
744.41	-12.5062	1.82769	-0.782423	-0.085822	0.0552727	0.0580894
744.72	-12.5118	1.82678	-0.781808	-0.0855778	0.0552894	0.058184
745.03	-12.5169	1.82581	-0.781158	-0.0853283	0.0553041	0.0582771
745.35	-12.5215	1.82477	-0.780474	-0.0850733	0.055317	0.0583686
745.67	-12.5255	1.82368	-0.779755	-0.0848128	0.0553279	0.0584586
745.99	-12.529	1.82253	-0.779002	-0.0845469	0.0553369	0.058547
746.31	-12.5319	1.82132	-0.778213	-0.0842755	0.0553439	0.0586338
746.63	-12.5343	1.82005	-0.77739	-0.0839985	0.0553489	0.058719
746.94	-12.5362	1.81871	-0.77653	-0.083716	0.055352	0.0588026
747.25	-12.5375	1.81731	-0.775635	-0.0834278	0.0553531	0.0588846
747.56	-12.5383	1.81585	-0.774704	-0.083134	0.0553522	0.0589649
747.86	-12.5385	1.81433	-0.773737	-0.0828344	0.0553492	0.0590436
748.16	-12.5381	1.81274	-0.772734	-0.0825292	0.0553442	0.0591206
748.46	-12.5372	1.81109	-0.771693	-0.0822182	0.0553372	0.0591959
748.76	-12.5357	1.80938	-0.770616	-0.0819013	0.0553281	0.0592696
749.06	-12.5336	1.8076	-0.769501	-0.0815787	0.0553169	0.0593415
749.36	-12.5309	1.80576	-0.768349	-0.08125	0.0553035	0.0594116
749.65	-12.5276	1.80385	-0.767158	-0.0809155	0.055288	0.05948
749.95	-12.5238	1.80187	-0.765929	-0.0805749	0.0552704	0.0595467
750.25	-12.5193	1.79983	-0.764661	-0.0802283	0.0552506	0.0596115
750.54	-12.5142	1.79772	-0.763355	-0.0798757	0.0552286	0.0596745
750.84	-12.5085	1.79554	-0.76201	-0.0795169	0.0552045	0.0597358
751.14	-12.5022	1.7933	-0.760626	-0.0791521	0.0551781	0.0597952
751.44	-12.4953	1.79098	-0.759202	-0.0787811	0.0551495	0.0598528
751.74	-12.4878	1.7886	-0.75774	-0.078404	0.0551188	0.0599086
752.04	-12.4797	1.78615	-0.756237	-0.0780207	0.0550858	0.0599625
752.34	-12.4709	1.78364	-0.754695	-0.0776312	0.0550505	0.0600146
752.65	-12.4615	1.78105	-0.753113	-0.0772354	0.0550131	0.0600648
752.96	-12.4515	1.77839	-0.75149	-0.0768333	0.0549733	0.0601131
753.27	-12.4409	1.77567	-0.749827	-0.0764249	0.0549312	0.0601596
753.58	-12.4296	1.77287	-0.748123	-0.07601	0.0548869	0.0602041
753.89	-12.4177	1.77	-0.746378	-0.0755888	0.0548402	0.0602467
754.19	-12.4051	1.76706	-0.744592	-0.0751611	0.0547912	0.0602874
754.49	-12.3919	1.76405	-0.742764	-0.074727	0.0547399	0.0603261
754.79	-12.378	1.76096	-0.740894	-0.0742863	0.0546862	0.0603629
755.08	-12.3635	1.7578	-0.738982	-0.0738391	0.0546302	0.0603977
755.37	-12.3483	1.75457	-0.737028	-0.0733854	0.0545718	0.0604305
755.66	-12.3324	1.75127	-0.735032	-0.072925	0.054511	0.0604613
755.95	-12.3159	1.74789	-0.732994	-0.0724581	0.0544478	0.0604902
756.23	-12.2987	1.74444	-0.730912	-0.0719845	0.0543821	0.060517
756.52	-12.2808	1.74092	-0.728788	-0.0715042	0.0543141	0.0605418
756.8	-12.2623	1.73732	-0.726621	-0.0710172	0.0542436	0.0605645
757.09	-12.243	1.73365	-0.72441	-0.0705234	0.0541707	0.0605852
757.37	-12.2231	1.7299	-0.722156	-0.0700229	0.0540953	0.0606039
757.66	-12.2025	1.72607	-0.719858	-0.0695157	0.0540175	0.0606205
757.94	-12.1812	1.72218	-0.717517	-0.0690017	0.0539372	0.060635
758.22	-12.1592	1.7182	-0.715132	-0.0684809	0.0538544	0.0606475
758.51	-12.1365	1.71416	-0.712703	-0.0679533	0.0537692	0.0606579
758.8	-12.1131	1.71003	-0.710231	-0.067419	0.0536815	0.0606662
759.09	-12.0891	1.70583	-0.707715	-0.0668779	0.0535913	0.0606725
759.38	-12.0643	1.70156	-0.705155	-0.0663299	0.0534987	0.0606767
759.67	-12.0389	1.69721	-0.702551	-0.0657751	0.0534035	0.0606788
759.97	-12.0127	1.69278	-0.699903	-0.0652135	0.0533059	0.0606788
760.26	-11.9858	1.68828	-0.69721	-0.064645	0.0532057	0.0606767
760.56	-11.9583	1.68371	-0.694473	-0.0640695	0.0531031	0.0606725
760.87	-11.93	1.67905	-0.691691	-0.0634872	0.0529978	0.0606662
761.17	-11.9009	1.67432	-0.688864	-0.0628979	0.0528901	0.0606577
761.48	-11.8712	1.66951	-0.685992	-0.0623016	0.0527798	0.060647
761.77	-11.8407	1.66463	-0.683074	-0.0616984	0.0526669	0.0606342
762.07	-11.8095	1.65967	-0.680112	-0.0610881	0.0525515	0.0606193
762.36	-11.7776	1.65463	-0.677104	-0.0604709	0.0524335	0.0606021
762.65	-11.7449	1.64952	-0.67405	-0.0598466	0.0523129	0.0605828
762.94	-11.7115	1.64432	-0.670951	-0.0592153	0.0521897	0.0605613
763.22	-11.6774	1.63906	-0.667806	-0.058577	0.0520639	0.0605376
763.51	-11.6425	1.63371	-0.664615	-0.0579316	0.0519355	0.0605117
763.79	-11.6068	1.62829	-0.661378	-0.0572791	0.0518045	0.0604835
764.08	-11.5704	1.62279	-0.658095	-0.0566196	0.0516708	0.0604532
764.36	-11.5332	1.61721	-0.654766	-0.0559529	0.0515346	0.0604206
764.64	-11.4953	1.61155	-0.65139	-0.0552792	0.0513957	0.0603857
764.92	-11.4566	1.60582	-0.647968	-0.0545983	0.0512541	0.0603487
765.21	-11.4171	1.60001	-0.6445	-0.0539103	0.0511099	0.0603094
765.49	-11.3769	1.59413	-0.640985	-0.0532153	0.0509631	0.0602678
765.78	-11.3359	1.58816	-0.637424	-0.0525131	0.0508137	0.060224
766.06	-11.2942	1.58212	-0.633817	-0.0518039	0.0506616	0.060178
766.35	-11.2517	1.576	-0.630163	-0.0510876	0.0505069	0.0601298
766.64	-11.2084	1.56981	-0.626463	-0.0503641	0.0503495	0.0600793
766.93	-11.1643	1.56354	-0.622716	-0.0496336	0.0501895	0.0600265
767.22	-11.1195	1.55719	-0.618923	-0.0488959	0.0500269	0.0599715
767.51	-11.0739	1.55076	-0.615083	-0.0481511	0.0498616	0.0599143
767.81	-11.0275	1.54426	-0.611197	-0.0473992	0.0496937	0.0598547
768.11	-10.9804	1.53768	-0.607264	-0.0466402	0.0495231	0.059793
768.42	-10.9324	1.53103	-0.603284	-0.0458741	0.0493498	0.059729
768.73	-10.8837	1.52429	-0.599258	-0.0451008	0.0491739	0.0596627
769.04	-10.8342	1.51748	-0.595185	-0.0443205	0.0489954	0.0595942
769.36	-10.784	1.5106	-0.591066	-0.0435331	0.0488142	0.0595234
769.66	-10.7329	1.50364	-0.5869	-0.0427386	0.0486303	0.0594504
769.97	-10.6811	1.4966	-0.582688	-0.041937	0.0484439	0.0593751
770.27	-10.6285	1.48948	-0.57843	-0.0411284	0.0482548	0.0592976
770.57	-10.5751	1.4823	-0.574125	-0.0403128	0.0480631	0.0592178
770.87	-10.5209	1.47503	-0.569774	-0.0394901	0.0478687	0.0591358
771.16	-10.4659	1.46769	-0.565377	-0.0386605	0.0476717	0.0590516
771.45	-10.4102	1.46028	-0.560934	-0.0378239	0.0474721	0.0589651
771.74	-10.3536	1.45279	-0.556445	-0.0369803	0.0472699	0.0588765
772.03	-10.2963	1.44523	-0.55191	-0.0361298	0.0470651	0.0587856
772.32	-10.2382	1.4376	-0.54733	-0.0352724	0.0468578	0.0586925
772.61	-10.1794	1.42989	-0.542704	-0.0344081	0.0466478	0.0585972
772.9	-10.1197	1.42211	-0.538033	-0.033537	0.0464353	0.0584997
773.18	-10.0593	1.41426	-0.533317	-0.0326591	0.0462202	0.0584001
773.47	-9.9981	1.40633	-0.528556	-0.0317743	0.0460026	0.0582983
773.76	-9.93613	1.39834	-0.523751	-0.0308828	0.0457824	0.0581943
774.05	-9.87338	1.39027	-0.5189	-0.0299846	0.0455597	0.0580881
774.34	-9.80985	1.38213	-0.514004	-0.0290795	0.0453345	0.0579798
774.62	-9.74554	1.37392	-0.509064	-0.0281678	0.0451067	0.0578693
774.92	-9.68045	1.36564	-0.504079	-0.0272492	0.0448763	0.0577566
775.21	-9.61458	1.35729	-0.499048	-0.0263239	0.0446434	0.0576418
775.5	-9.54792	1.34887	-0.493973	-0.0253919	0.044408	0.0575248
775.8	-9.48047	1.34037	-0.488854	-0.0244531	0.04417	0.0574056
776.1	-9.41224	1.33181	-0.483689	-0.0235077	0.0439295	0.0572843
776.4	-9.34322	1.32318	-0.47848	-0.0225555	0.0436865	0.0571607
776.7	-9.2734	1.31447	-0.473226	-0.0215966	0.0434409	0.057035
777	-9.20279	1.3057	-0.467927	-0.020631	0.0431928	0.0569072
777.3	-9.13138	1.29686	-0.462583	-0.0196587	0.0429421	0.0567771
777.59	-9.05917	1.28795	-0.457194	-0.0186797	0.0426888	0.0566449
777.88	-8.98615	1.27897	-0.451761	-0.017694	0.0424331	0.0565104
778.16	-8.91232	1.26992	-0.446282	-0.0167016	0.0421747	0.0563738
778.44	-8.83768	1.2608	-0.440759	-0.0157025	0.0419138	0.0562349
778.72	-8.76223	1.25162	-0.43519	-0.0146967	0.0416503	0.0560938
779	-8.68597	1.24236	-0.429577	-0.0136843	0.0413843	0.0559506
779.28	-8.6089	1.23304	-0.423919	-0.0126652	0.0411157	0.0558051
779.56	-8.53101	1.22365	-0.418216	-0.0116394	0.0408446	0.0556575
779.84	-8.45231	1.21419	-0.412468	-0.010607	0.040571	0.0555077
780.11	-8.37279	1.20466	-0.406676	-0.00956801	0.0402948	0.0553557
780.39	-8.29246	1.19507	-0.400839	-0.0085224	0.040016	0.0552015
780.66	-8.21131	1.18541	-0.394957	-0.00747015	0.0397347	0.0550451
780.94	-8.12933	1.17568	-0.389031	-0.00641128	0.0394509	0.0548864
781.21	-8.04652	1.16588	-0.383059	-0.00534576	0.0391645	0.0547256
781.49	-7.96288	1.15602	-0.377043	-0.00427362	0.0388755	0.0545626
781.77	-7.8784	1.14609	-0.370982	-0.00319483	0.038584	0.0543973
782.04	-7.79309	1.13609	-0.364875	-0.00210938	0.0382899	0.0542298
782.32	-7.70694	1.12603	-0.358723	-0.0010173	0.0379932	0.0540601
782.61	-7.61995	1.1159	-0.352526	8.14336e-05	0.037694	0.0538881
782.89	-7.53212	1.1057	-0.346285	0.00118678	0.0373921	0.0537139
783.18	-7.44345	1.09544	-0.339998	0.00229871	0.0370878	0.0535375
783.46	-7.35393	1.08511	-0.333666	0.00341722	0.0367808	0.0533589
783.76	-7.26356	1.07472	-0.32729	0.0045423	0.0364713	0.053178
784.05	-7.17234	1.06426	-0.320868	0.00567393	0.0361592	0.0529949
784.35	-7.08027	1.05374	-0.314403	0.00681208	0.0358446	0.0528096
784.64	-6.98736	1.04315	-0.307892	0.00795673	0.0355275	0.052622
784.93	-6.89358	1.0325	-0.301337	0.00910785	0.0352078	0.0524323
785.22	-6.79896	1.02179	-0.294738	0.0102654	0.0348855	0.0522403
785.5	-6.70349	1.01101	-0.288095	0.0114294	0.0345608	0.0520462
785.78	-6.60716	1.00017	-0.281408	0.0125997	0.0342335	0.0518498
786.06	-6.50998	0.989275	-0.274677	0.0137764	0.0339038	0.0516513
786.34	-6.41195	0.978316	-0.267903	0.0149593	0.0335716	0.0514506
786.62	-6.31308	0.967297	-0.261086	0.0161484	0.0332369	0.0512478
786.89	-6.21337	0.956219	-0.254226	0.0173437	0.0328997	0.0510428
787.17	-6.1128	0.945083	-0.247324	0.0185451	0.0325602	0.0508357
787.44	-6.01139	0.933889	-0.240378	0.0197527	0.0322182	0.0506265
787.71	-5.90912	0.922637	-0.233391	0.0209664	0.0318737	0.0504151
787.99	-5.806	0.911328	-0.226361	0.0221861	0.0315269	0.0502016
788.26	-5.70203	0.899962	-0.219289	0.0234119	0.0311776	0.049986
788.54	-5.5972	0.88854	-0.212174	0.0246437	0.0308259	0.0497682
788.81	-5.49151	0.877061	-0.205017	0.0258816	0.0304718	0.0495483
789.09	-5.38496	0.865527	-0.197818	0.0271255	0.0301152	0.0493262
789.36	-5.27754	0.853937	-0.190576	0.0283754	0.0297562	0.0491021
789.64	-5.16926	0.842293	-0.183293	0.0296312	0.0293949	0.0488758
789.92	-5.06012	0.830595	-0.175968	0.0308929	0.0290311	0.0486474
790.2	-4.95011	0.818844	-0.168602	0.0321605	0.028665	0.0484169
790.49	-4.83924	0.807041	-0.161194	0.0334339	0.0282965	0.0481843
790.78	-4.7275	0.795185	-0.153746	0.0347131	0.0279256	0.0479496
791.07	-4.61488	0.783278	-0.146255	0.0359981	0.0275524	0.0477128
791.36	-4.5014	0.77132	-0.138725	0.0372889	0.0271768	0.0474739
791.65	-4.38704	0.759312	-0.131153	0.0385853	0.0267988	0.047233
791.96	-4.2718	0.747254	-0.12354	0.0398874	0.0264185	0.0469899
792.26	-4.15569	0.735146	-0.115887	0.0411952	0.0260359	0.0467448
792.56	-4.03871	0.72299	-0.108194	0.0425086	0.0256509	0.0464975
792.86	-3.92085	0.710785	-0.10046	0.0438276	0.0252637	0.0462483
793.16	-3.80212	0.698534	-0.0926866	0.0451521	0.0248741	0.0459969
793.45	-3.68251	0.686235	-0.0848735	0.0464821	0.0244822	0.0457436
793.74	-3.56204	0.67389	-0.0770209	0.0478176	0.0240881	0.0454882
794.03	-3.44069	0.6615	-0.069129	0.0491584	0.0236917	0.0452307
794.31	-3.31846	0.649064	-0.0611977	0.0505047	0.0232931	0.0449713
794.6	-3.19536	0.636583	-0.0532273	0.0518564	0.0228922	0.0447098
794.88	-3.07138	0.624058	-0.0452177	0.0532134	0.022489	0.0444463
795.16	-2.94652	0.611488	-0.0371692	0.0545757	0.0220836	0.0441808
795.44	-2.82078	0.598875	-0.0290817	0.0559434	0.021676	0.0439133
795.72	-2.69416	0.586217	-0.0209552	0.0573164	0.0212661	0.0436438
796	-2.56666	0.573517	-0.0127899	0.0586947	0.0208539	0.0433722
796.28	-2.43827	0.560773	-0.0045859	0.0600783	0.0204396	0.0430987
796.55	-2.30901	0.547988	0.00365641	0.0614671	0.020023	0.0428231
796.83	-2.17886	0.535161	0.0119368	0.062861	0.0196042	0.0425456
797.11	-2.04784	0.522294	0.0202551	0.06426	0.0191833	0.0422661
797.39	-1.91594	0.509386	0.0286112	0.0656642	0.0187601	0.0419847
797.67	-1.78315	0.496439	0.0370048	0.0670734	0.0183348	0.0417013
797.95	-1.64949	0.483453	0.0454356	0.0684876	0.0179074	0.0414159
798.24	-1.51496	0.470429	0.0539035	0.0699067	0.0174778	0.0411286
798.52	-1.37954	0.457368	0.0624081	0.0713307	0.0170461	0.0408395
798.81	-1.24325	0.444269	0.0709493	0.0727597	0.0166123	0.0405484
799.09	-1.10609	0.431135	0.079527	0.0741934	0.0161764	0.0402554
799.39	-0.968058	0.417964	0.0881408	0.075632	0.0157385	0.0399605
799.68	-0.829154	0.404758	0.0967904	0.0770753	0.0152984	0.0396638
799.97	-0.689384	0.391518	0.105476	0.0785233	0.0148563	0.0393652
800.26	-0.548751	0.378245	0.114196	0.0799759	0.0144122	0.0390647
800.54	-0.407255	0.364939	0.122951	0.081433	0.0139661	0.0387625
800.83	-0.264898	0.3516	0.131741	0.0828948	0.013518	0.0384584
801.1	-0.121679	0.338229	0.140566	0.084361	0.0130679	0.0381526
801.38	0.0224019	0.324828	0.149425	0.0858318	0.0126159	0.0378449
801.65	0.167344	0.311396	0.158318	0.0873069	0.0121618	0.0375355
801.93	0.313147	0.297933	0.167245	0.0887865	0.0117058	0.0372242
802.2	0.459813	0.284441	0.176206	0.0902705	0.0112479	0.0369112
802.47	0.607344	0.270919	0.185201	0.0917588	0.010788	0.0365964
802.74	0.75574	0.257368	0.19423	0.0932515	0.0103262	0.0362799
803	0.905	0.243788	0.203292	0.0947485	0.00986242	0.0359616
803.27	1.05512	0.230181	0.212388	0.0962498	0.00939675	0.0356415
803.54	1.20611	0.216547	0.221517	0.0977553	0.00892918	0.0353197
803.81	1.35796	0.202887	0.230679	0.0992649	0.00845971	0.0349961
804.07	1.51068	0.1892	0.239874	0.100779	0.00798836	0.0346709
804.34	1.66426	0.175488	0.249101	0.102297	0.00751512	0.0343439
804.61	1.81871	0.161751	0.258361	0.103819	0.00704001	0.0340151
804.88	1.97403	0.14799	0.267653	0.105345	0.00656305	0.0336847
805.14	2.13022	0.134205	0.276978	0.106875	0.00608423	0.0333525
805.42	2.28728	0.120396	0.286334	0.108409	0.00560356	0.0330187
805.69	2.44521	0.106565	0.295723	0.109947	0.00512105	0.0326831
805.96	2.604	0.0927109	0.305143	0.111489	0.00463672	0.0323458
806.24	2.76367	0.078835	0.314595	0.113035	0.00415056	0.0320069
806.52	2.9242	0.0649378	0.324078	0.114585	0.00366261	0.0316663
806.8	3.08559	0.0510196	0.333593	0.116139	0.00317287	0.0313241
807.08	3.24785	0.037081	0.343138	0.117696	0.00268135	0.0309802
807.37	3.41098	0.0231223	0.352714	0.119258	0.00218805	0.0306346
807.66	3.57497	0.00914384	0.362322	0.120823	0.00169298	0.0302874
807.94	3.73983	-0.00485389	0.37196	0.122391	0.00119615	0.0299386
808.22	3.90556	-0.0188706	0.381628	0.123964	0.000697555	0.0295881
808.49	4.07216	-0.0329059	0.391327	0.12554	0.000197211	0.029236
808.77	4.23962	-0.0469597	0.401057	0.12712	-0.000304885	0.0288822
809.04	4.40796	-0.0610316	0.410817	0.128703	-0.000808727	0.0285269
809.31	4.57717	-0.0751212	0.420608	0.130291	-0.00131431	0.0281699
809.58	4.74726	-0.0892279	0.430428	0.131881	-0.00182161	0.0278113
809.85	4.91821	-0.103351	0.440279	0.133476	-0.00233063	0.0274511
810.12	5.09003	-0.11749	0.450159	0.135073	-0.00284134	0.0270893
810.38	5.26271	-0.131644	0.460068	0.136675	-0.00335373	0.0267259
810.65	5.43627	-0.145812	0.470007	0.138279	-0.0038678	0.026361
810.91	5.61069	-0.159994	0.479974	0.139888	-0.00438351	0.0259945
811.18	5.78597	-0.174188	0.48997	0.141499	-0.00490086	0.0256265
811.45	5.96212	-0.188394	0.499994	0.143114	-0.00541983	0.025257
811.71	6.13914	-0.202612	0.510046	0.144731	-0.00594039	0.0248859
811.98	6.31701	-0.216839	0.520125	0.146352	-0.00646254	0.0245133
812.25	6.49574	-0.231076	0.530232	0.147976	-0.00698625	0.0241393
812.51	6.67533	-0.245321	0.540366	0.149603	-0.0075115	0.0237638
812.78	6.85577	-0.259574	0.550527	0.151234	-0.00803826	0.0233869
813.05	7.03706	-0.273833	0.560713	0.152866	-0.0085665	0.0230085
813.33	7.21919	-0.288097	0.570925	0.154502	-0.0090962	0.0226288
813.61	7.40216	-0.302365	0.581162	0.15614	-0.00962734	0.0222477
813.91	7.58597	-0.316637	0.591424	0.157781	-0.0101599	0.0218652
814.22	7.77062	-0.33091	0.60171	0.159425	-0.0106938	0.0214814
814.53	7.95611	-0.345185	0.61202	0.161071	-0.0112291	0.0210963
814.84	8.14243	-0.35946	0.622354	0.16272	-0.0117658	0.0207098
815.14	8.32959	-0.373734	0.632712	0.164371	-0.0123038	0.0203221
815.44	8.51758	-0.388008	0.643092	0.166024	-0.0128431	0.0199331
815.74	8.7064	-0.402279	0.653496	0.167679	-0.0133837	0.0195428
816.04	8.89605	-0.416546	0.663922	0.169337	-0.0139256	0.0191513
816.34	9.08653	-0.43081	0.67437	0.170997	-0.0144688	0.0187586
816.63	9.27783	-0.445067	0.684839	0.172659	-0.0150131	0.0183646
816.93	9.46995	-0.459317	0.69533	0.174323	-0.0155587	0.0179695
817.23	9.6629	-0.473559	0.705841	0.175989	-0.0161054	0.0175732
817.53	9.85665	-0.487791	0.716372	0.177656	-0.0166533	0.0171758
817.83	10.0512	-0.502013	0.726923	0.179326	-0.0172023	0.0167773
818.14	10.2466	-0.516221	0.737492	0.180996	-0.0177524	0.0163777
818.44	10.4428	-0.530417	0.748081	0.182669	-0.0183035	0.015977
818.75	10.6398	-0.544597	0.758687	0.184343	-0.0188557	0.0155752
819.06	10.8376	-0.558762	0.769312	0.186018	-0.0194088	0.0151725
819.36	11.0362	-0.57291	0.779953	0.187694	-0.019963	0.0147687
819.65	11.2356	-0.58704	0.790612	0.189372	-0.0205181	0.0143639
819.94	11.4358	-0.601151	0.801287	0.191051	-0.0210741	0.0139582
820.22	11.6368	-0.615242	0.811978	0.19273	-0.0216311	0.0135516
820.49	11.8386	-0.629312	0.822684	0.194411	-0.0221889	0.013144
820.76	12.0411	-0.643358	0.833406	0.196093	-0.0227476	0.0127355
821.03	12.2445	-0.657382	0.844142	0.197776	-0.0233071	0.0123262
821.29	12.4486	-0.671381	0.854893	0.199459	-0.0238673	0.011916
821.55	12.6535	-0.685355	0.865657	0.201143	-0.0244284	0.0115049
821.81	12.8591	-0.699302	0.876435	0.202827	-0.0249902	0.0110931
822.07	13.0655	-0.713222	0.887226	0.204513	-0.0255528	0.0106804
822.32	13.2728	-0.727114	0.898031	0.206198	-0.0261161	0.010267
822.57	13.4807	-0.740978	0.908848	0.207884	-0.0266801	0.00985274
822.83	13.6895	-0.754812	0.919677	0.209571	-0.0272448	0.00943776
823.08	13.899	-0.768616	0.930518	0.211258	-0.0278101	0.00902205
823.33	14.1092	-0.782388	0.94137	0.212945	-0.0283761	0.00860564
823.59	14.3202	-0.796126	0.952233	0.214632	-0.0289426	0.00818855
823.84	14.532	-0.80983	0.963106	0.216319	-0.0295097	0.00777082
824.1	14.7445	-0.823497	0.973989	0.218006	-0.0300773	0.00735246
824.35	14.9577	-0.837127	0.984881	0.219693	-0.0306454	0.00693351
824.61	15.1717	-0.850718	0.995781	0.22138	-0.031214	0.006514
824.87	15.3864	-0.864268	1.00669	0.223066	-0.031783	0.00609395
825.14	15.6018	-0.877776	1.0176	0.224752	-0.0323523	0.0056734
825.41	15.8179	-0.891242	1.02853	0.226437	-0.0329221	0.00525237
825.68	16.0348	-0.904663	1.03946	0.228122	-0.0334921	0.00483088
825.96	16.2524	-0.918039	1.05039	0.229806	-0.0340625	0.00440896
826.24	16.4707	-0.931368	1.06133	0.231489	-0.0346331	0.00398664
826.52	16.6897	-0.944649	1.07227	0.233171	-0.0352039	0.00356396
826.81	16.9093	-0.95788	1.08322	0.234852	-0.0357749	0.00314096
827.08	17.1297	-0.97106	1.09417	0.236532	-0.0363461	0.00271764
827.35	17.3508	-0.984187	1.10513	0.23821	-0.0369174	0.00229404
827.62	17.5725	-0.997261	1.11608	0.239887	-0.0374888	0.00187019
827.89	17.7949	-1.01028	1.12704	0.241563	-0.0380602	0.00144611
828.15	18.018	-1.02324	1.138	0.243238	-0.0386317	0.00102181
828.41	18.2418	-1.03615	1.14896	0.24491	-0.0392032	0.000597331
828.67	18.4662	-1.049	1.15992	0.246581	-0.0397747	0.00017267
828.93	18.6914	-1.06179	1.17088	0.248251	-0.0403462	-0.000252156
829.19	18.9172	-1.07452	1.18185	0.249919	-0.0409176	-0.000677124
829.45	19.1436	-1.08719	1.19281	0.251585	-0.041489	-0.00110221
829.7	19.3707	-1.09979	1.20377	0.253249	-0.0420602	-0.00152739
829.96	19.5985	-1.11234	1.21473	0.25491	-0.0426313	-0.00195264
830.22	19.827	-1.12481	1.22569	0.25657	-0.0432023	-0.00237795
830.48	20.0561	-1.13723	1.23664	0.258228	-0.0437731	-0.00280329
830.74	20.2858	-1.14957	1.24759	0.259883	-0.0443437	-0.00322865
831	20.5162	-1.16185	1.25854	0.261536	-0.044914	-0.00365401
831.27	20.7473	-1.17406	1.26949	0.263187	-0.0454841	-0.00407935
831.53	20.979	-1.18619	1.28043	0.264835	-0.046054	-0.00450465
831.8	21.2114	-1.19826	1.29137	0.266481	-0.0466235	-0.0049299
832.08	21.4444	-1.21025	1.3023	0.268124	-0.0471928	-0.00535509
832.36	21.6781	-1.22217	1.31323	0.269764	-0.0477617	-0.0057802
832.64	21.9124	-1.23402	1.32415	0.271402	-0.0483303	-0.00620522
832.93	22.1473	-1.24579	1.33507	0.273037	-0.0488985	-0.00663011
833.23	22.3829	-1.25748	1.34598	0.274669	-0.0494663	-0.00705487
833.53	22.6192	-1.2691	1.35689	0.276298	-0.0500337	-0.00747948
833.83	22.856	-1.28064	1.36778	0.277924	-0.0506007	-0.00790394
834.13	23.0936	-1.2921	1.37868	0.279548	-0.0511673	-0.00832823
834.43	23.3317	-1.30349	1.38956	0.281168	-0.0517334	-0.00875235
834.72	23.5705	-1.31479	1.40044	0.282785	-0.0522991	-0.00917628
835.02	23.81	-1.32601	1.41131	0.284399	-0.0528643	-0.00960004
835.31	24.0501	-1.33716	1.42217	0.28601	-0.053429	-0.0100236
835.6	24.2908	-1.34822	1.43303	0.287617	-0.0539933	-0.010447
835.9	24.5322	-1.3592	1.44388	0.289222	-0.054557	-0.0108702
836.19	24.7743	-1.37009	1.45472	0.290823	-0.0551203	-0.0112931
836.48	25.017	-1.38091	1.46555	0.292421	-0.0556831	-0.0117159
836.78	25.2603	-1.39164	1.47638	0.294016	-0.0562453	-0.0121383
837.09	25.5043	-1.40228	1.48719	0.295607	-0.0568069	-0.0125606
837.42	25.7489	-1.41284	1.498	0.297194	-0.057368	-0.0129825
837.74	25.9942	-1.4233	1.50879	0.298778	-0.0579284	-0.0134042
838.06	26.2401	-1.43368	1.51958	0.300359	-0.0584883	-0.0138256
838.38	26.4867	-1.44397	1.53035	0.301935	-0.0590475	-0.0142466
838.69	26.7338	-1.45417	1.54112	0.303508	-0.059606	-0.0146673
839	26.9817	-1.46428	1.55187	0.305077	-0.0601638	-0.0150876
839.31	27.2301	-1.47429	1.56261	0.306642	-0.0607209	-0.0155076
839.62	27.4792	-1.48421	1.57334	0.308203	-0.0612773	-0.0159272
839.93	27.729	-1.49403	1.58406	0.309759	-0.0618329	-0.0163463
840.25	27.9794	-1.50376	1.59476	0.311312	-0.0623878	-0.016765
840.56	28.2303	-1.51338	1.60546	0.31286	-0.0629417	-0.0171833
840.88	28.482	-1.52291	1.61613	0.314404	-0.0634949	-0.017601
841.19	28.7342	-1.53234	1.62679	0.315943	-0.0640472	-0.0180183
841.51	28.9871	-1.54166	1.63744	0.317478	-0.0645986	-0.018435
841.82	29.2405	-1.55088	1.64807	0.319009	-0.065149	-0.0188512
842.13	29.4947	-1.56	1.65869	0.320534	-0.0656986	-0.0192669
842.44	29.7494	-1.56902	1.66929	0.322055	-0.0662473	-0.019682
842.75	30.0048	-1.57793	1.67988	0.323572	-0.066795	-0.0200967
843.06	30.2608	-1.58673	1.69045	0.325083	-0.0673418	-0.0205107
843.37	30.5174	-1.59543	1.70101	0.32659	-0.0678876	-0.0209242
843.68	30.7747	-1.60402	1.71155	0.328092	-0.0684325	-0.0213372
843.99	31.0326	-1.6125	1.72207	0.329589	-0.0689764	-0.0217496
844.3	31.2912	-1.62087	1.73257	0.331082	-0.0695193	-0.0221613
844.6	31.5503	-1.62914	1.74306	0.332569	-0.0700611	-0.0225725
844.9	31.8101	-1.63729	1.75353	0.334051	-0.0706019	-0.0229831
845.2	32.0706	-1.64533	1.76399	0.335528	-0.0711417	-0.023393
845.5	32.3317	-1.65325	1.77442	0.336999	-0.0716804	-0.0238023
845.8	32.5934	-1.66106	1.78484	0.338466	-0.072218	-0.024211
846.09	32.8558	-1.66876	1.79524	0.339927	-0.0727546	-0.024619
846.39	33.1188	-1.67633	1.80562	0.341382	-0.07329	-0.0250264
846.69	33.3824	-1.6838	1.81598	0.342833	-0.0738243	-0.025433
847	33.6467	-1.69114	1.82632	0.344277	-0.0743575	-0.025839
847.3	33.9117	-1.69836	1.83664	0.345717	-0.0748895	-0.0262443
847.61	34.1773	-1.70547	1.84694	0.34715	-0.0754203	-0.0266489
847.92	34.4435	-1.71245	1.85722	0.348578	-0.0759499	-0.0270528
848.22	34.7103	-1.71931	1.86748	0.35	-0.0764782	-0.0274558
848.53	34.9778	-1.72605	1.87772	0.351416	-0.0770054	-0.0278582
848.83	35.2459	-1.73266	1.88794	0.352827	-0.0775313	-0.0282597
849.14	35.5147	-1.73915	1.89814	0.354231	-0.0780559	-0.0286605
849.44	35.7841	-1.74551	1.90831	0.35563	-0.0785793	-0.0290605
849.74	36.0542	-1.75175	1.91846	0.357022	-0.0791013	-0.0294597
850.05	36.3249	-1.75786	1.92859	0.358409	-0.0796221	-0.0298582
850.35	36.5962	-1.76385	1.9387	0.359789	-0.0801416	-0.0302558
850.65	36.8682	-1.7697	1.94879	0.361164	-0.0806597	-0.0306526
850.94	37.1408	-1.77543	1.95885	0.362532	-0.0811766	-0.0310486
851.24	37.4141	-1.78102	1.96889	0.363894	-0.081692	-0.0314437
851.53	37.688	-1.78649	1.97891	0.365249	-0.0822061	-0.031838
851.83	37.9626	-1.79182	1.9889	0.366599	-0.0827188	-0.0322314
852.12	38.2378	-1.79702	1.99887	0.367941	-0.0832301	-0.0326239
852.42	38.5136	-1.80208	2.00881	0.369278	-0.0837399	-0.0330156
852.71	38.7901	-1.80701	2.01873	0.370607	-0.0842483	-0.0334063
853.01	39.0672	-1.8118	2.02862	0.37193	-0.0847552	-0.033796
853.29	39.345	-1.81646	2.03849	0.373246	-0.0852606	-0.0341848
853.57	39.6234	-1.82097	2.04833	0.374556	-0.0857644	-0.0345726
853.84	39.9024	-1.82535	2.05814	0.375858	-0.0862667	-0.0349594
854.13	40.1821	-1.82959	2.06793	0.377154	-0.0867675	-0.0353453
854.42	40.4624	-1.83368	2.07769	0.378442	-0.0872666	-0.03573
854.69	40.7433	-1.83763	2.08742	0.379724	-0.0877641	-0.0361138
854.96	41.0248	-1.84143	2.09712	0.380998	-0.0882599	-0.0364964
855.22	41.307	-1.84509	2.1068	0.382264	-0.088754	-0.0368779
855.47	41.5897	-1.8486	2.11644	0.383524	-0.0892464	-0.0372583
855.72	41.8731	-1.85196	2.12606	0.384776	-0.0897371	-0.0376376
855.98	42.1572	-1.85518	2.13564	0.38602	-0.0902261	-0.0380157
856.23	42.4418	-1.85824	2.1452	0.387257	-0.0907133	-0.0383927
856.5	42.7271	-1.86115	2.15472	0.388487	-0.0911988	-0.0387685
856.77	43.013	-1.86392	2.16422	0.389709	-0.0916825	-0.0391432
857.05	43.2995	-1.86653	2.17368	0.390923	-0.0921644	-0.0395167
857.35	43.5866	-1.86899	2.18312	0.392129	-0.0926446	-0.0398891
857.66	43.8744	-1.8713	2.19252	0.393328	-0.093123	-0.0402603
857.98	44.1628	-1.87345	2.20189	0.394519	-0.0935995	-0.0406303
858.29	44.4519	-1.87545	2.21124	0.395702	-0.0940743	-0.0409991
858.6	44.7416	-1.8773	2.22055	0.396878	-0.0945472	-0.0413668
858.91	45.0319	-1.87899	2.22982	0.398045	-0.0950183	-0.0417332
859.23	45.3229	-1.88052	2.23907	0.399205	-0.0954876	-0.0420985
859.55	45.6145	-1.8819	2.24829	0.400357	-0.0959551	-0.0424626
859.87	45.9068	-1.88311	2.25747	0.401501	-0.0964207	-0.0428255
860.18	46.1997	-1.88417	2.26662	0.402636	-0.0968845	-0.0431872
860.5	46.4933	-1.88508	2.27574	0.403764	-0.0973465	-0.0435477
860.82	46.7876	-1.88582	2.28483	0.404884	-0.0978065	-0.043907
861.13	47.0825	-1.8864	2.29389	0.405996	-0.0982648	-0.0442652
861.45	47.3781	-1.88682	2.30291	0.407099	-0.0987211	-0.0446221
861.75	47.6744	-1.88708	2.3119	0.408194	-0.0991756	-0.0449778
862.06	47.9713	-1.88718	2.32086	0.409281	-0.0996281	-0.0453322
862.36	48.2688	-1.88711	2.32978	0.41036	-0.100079	-0.0456855
862.67	48.5671	-1.88688	2.33867	0.411431	-0.100527	-0.0460374
862.97	48.866	-1.88649	2.34753	0.412493	-0.100974	-0.0463882
863.28	49.1655	-1.88593	2.35635	0.413546	-0.101419	-0.0467377
863.59	49.4658	-1.8852	2.36514	0.414592	-0.101862	-0.0470859
863.9	49.7668	-1.88431	2.3739	0.415629	-0.102303	-0.047433
864.2	50.0684	-1.88326	2.38262	0.416658	-0.102742	-0.0477788
864.51	50.3707	-1.88204	2.39131	0.417678	-0.103179	-0.0481234
864.82	50.6737	-1.88065	2.39997	0.41869	-0.103615	-0.0484668
865.12	50.9774	-1.8791	2.40859	0.419693	-0.104048	-0.0488089
865.43	51.2818	-1.87737	2.41718	0.420688	-0.104479	-0.0491498
865.73	51.5869	-1.87548	2.42573	0.421674	-0.104909	-0.0494895
866.03	51.8927	-1.87342	2.43425	0.422652	-0.105336	-0.0498278
866.33	52.1992	-1.87119	2.44274	0.42362	-0.105761	-0.050165
866.63	52.5064	-1.86878	2.45119	0.424581	-0.106185	-0.0505008
866.93	52.8143	-1.8662	2.4596	0.425532	-0.106606	-0.0508354
867.24	53.1229	-1.86345	2.46798	0.426474	-0.107026	-0.0511686
867.54	53.4322	-1.86052	2.47633	0.427408	-0.107443	-0.0515006
867.85	53.7422	-1.85742	2.48463	0.428332	-0.107858	-0.0518312
868.16	54.0529	-1.85414	2.4929	0.429248	-0.108271	-0.0521604
868.47	54.3643	-1.85068	2.50114	0.430154	-0.108682	-0.0524883
868.78	54.6764	-1.84704	2.50933	0.431051	-0.109091	-0.0528148
869.09	54.9892	-1.84322	2.51749	0.431939	-0.109497	-0.0531399
869.39	55.3026	-1.83922	2.5256	0.432817	-0.109902	-0.0534635
869.69	55.6168	-1.83503	2.53368	0.433685	-0.110304	-0.0537856
869.99	55.9316	-1.83065	2.54172	0.434544	-0.110704	-0.0541062
870.29	56.2471	-1.82609	2.54972	0.435393	-0.111101	-0.0544253
870.58	56.5634	-1.82134	2.55767	0.436232	-0.111496	-0.0547429
870.87	56.8803	-1.8164	2.56559	0.437062	-0.111889	-0.055059
871.16	57.1978	-1.81127	2.57346	0.437881	-0.112279	-0.0553734
871.44	57.5161	-1.80594	2.5813	0.43869	-0.112667	-0.0556864
871.71	57.8351	-1.80043	2.58909	0.439489	-0.113053	-0.0559977
871.97	58.1547	-1.79472	2.59683	0.440279	-0.113436	-0.0563075
872.23	58.475	-1.78882	2.60454	0.441057	-0.113817	-0.0566157
872.5	58.7961	-1.78271	2.6122	0.441826	-0.114195	-0.0569222
872.76	59.1178	-1.77641	2.61982	0.442584	-0.114571	-0.057227
873	59.4401	-1.76991	2.62739	0.443331	-0.114944	-0.0575302
873.24	59.7632	-1.76321	2.63492	0.444068	-0.115315	-0.0578316
873.47	60.0869	-1.7563	2.6424	0.444794	-0.115683	-0.0581313
873.69	60.4114	-1.74919	2.64983	0.445509	-0.116048	-0.0584293
873.9	60.7365	-1.74187	2.65722	0.446213	-0.116411	-0.0587255
874.12	61.0622	-1.73435	2.66456	0.446906	-0.116771	-0.0590198
874.32	61.3887	-1.72661	2.67186	0.447587	-0.117128	-0.0593124
874.51	61.7158	-1.71866	2.6791	0.448258	-0.117482	-0.0596031
874.7	62.0436	-1.7105	2.6863	0.448917	-0.117834	-0.0598919
874.89	62.372	-1.70213	2.69345	0.449565	-0.118183	-0.0601789
875.08	62.7011	-1.69354	2.70054	0.4502	-0.118529	-0.0604639
875.27	63.0309	-1.68473	2.70759	0.450825	-0.118872	-0.0607469
875.46	63.3613	-1.67571	2.71458	0.451437	-0.119212	-0.061028
875.65	63.6924	-1.66646	2.72152	0.452037	-0.119549	-0.061307
875.84	64.0241	-1.65699	2.72841	0.452626	-0.119884	-0.061584
876.03	64.3564	-1.6473	2.73525	0.453202	-0.120215	-0.0618589
876.22	64.6895	-1.63738	2.74203	0.453766	-0.120543	-0.0621318
876.41	65.0231	-1.62723	2.74876	0.454318	-0.120868	-0.0624026
876.6	65.3574	-1.61686	2.75544	0.454857	-0.12119	-0.0626712
876.79	65.6924	-1.60626	2.76206	0.455384	-0.121509	-0.0629377
876.98	66.028	-1.59543	2.76862	0.455899	-0.121824	-0.0632021
877.17	66.3643	-1.58437	2.77513	0.4564	-0.122137	-0.0634643
877.35	66.7011	-1.57307	2.78158	0.456889	-0.122446	-0.0637243
877.54	67.0386	-1.56154	2.78798	0.457365	-0.122752	-0.063982
877.73	67.3768	-1.54977	2.79432	0.457828	-0.123055	-0.0642373
877.92	67.7155	-1.53776	2.80059	0.458277	-0.123354	-0.0644904
878.11	68.0549	-1.52551	2.80681	0.458714	-0.12365	-0.0647411
878.3	68.3949	-1.51301	2.81297	0.459136	-0.123942	-0.0649893
878.48	68.7354	-1.50027	2.81906	0.459545	-0.124231	-0.0652352
878.67	69.0766	-1.48727	2.8251	0.45994	-0.124516	-0.0654785
878.86	69.4184	-1.47403	2.83107	0.460321	-0.124798	-0.0657192
879.05	69.7607	-1.46053	2.83697	0.460688	-0.125076	-0.0659574
879.24	70.1036	-1.44678	2.84281	0.461041	-0.12535	-0.066193
879.42	70.4471	-1.43277	2.84859	0.461379	-0.125621	-0.0664259
879.62	70.7912	-1.41851	2.8543	0.461703	-0.125887	-0.0666562
879.84	71.1358	-1.40398	2.85994	0.462012	-0.12615	-0.0668836
880.03	71.481	-1.38918	2.86551	0.462305	-0.126409	-0.0671082
[truncated: 13,641 more rows]

## Sheet: Sheet2
0.01976	-3.58553	0.953929	0.250005	0.104529	-0.0463042	-0.0429035
0.068727	-3.58373	0.954314	0.249513	0.104549	-0.0461381	-0.0425214
0.14849	-3.58179	0.954667	0.249009	0.104566	-0.0459693	-0.0421351
0.27841	-3.5797	0.954988	0.248492	0.104579	-0.0457976	-0.0417446
0.49004	-3.57746	0.955277	0.247963	0.104588	-0.045623	-0.0413497
0.83477	-3.57506	0.955534	0.247422	0.104594	-0.0454457	-0.0409506
1.3963	-3.57251	0.955759	0.246867	0.104596	-0.0452654	-0.0405471
2.3109	-3.56981	0.955951	0.246301	0.104595	-0.0450823	-0.0401394
3.8008	-3.56696	0.956111	0.245721	0.104589	-0.0448964	-0.0397273
5.7546	-3.56394	0.956238	0.245129	0.10458	-0.0447075	-0.0393108
7.7111	-3.56078	0.956332	0.244523	0.104567	-0.0445156	-0.0388899
9.6675	-3.55745	0.956393	0.243905	0.104551	-0.0443209	-0.0384646
11.624	-3.55396	0.95642	0.243274	0.10453	-0.0441231	-0.0380348
13.58	-3.55032	0.956413	0.24263	0.104506	-0.0439224	-0.0376006
15.537	-3.54652	0.956372	0.241972	0.104477	-0.0437188	-0.0371619
17.493	-3.54255	0.956297	0.241301	0.104445	-0.0435121	-0.0367187
19.45	-3.53842	0.956188	0.240617	0.104409	-0.0433024	-0.0362709
21.406	-3.53413	0.956044	0.239919	0.104369	-0.0430896	-0.0358187
23.363	-3.52967	0.955865	0.239208	0.104324	-0.0428738	-0.0353618
25.319	-3.52505	0.955652	0.238484	0.104276	-0.042655	-0.0349004
27.276	-3.52027	0.955403	0.237746	0.104224	-0.0424331	-0.0344344
29.232	-3.51531	0.95512	0.236994	0.104168	-0.0422082	-0.0339638
31.189	-3.51019	0.9548	0.236229	0.104108	-0.0419801	-0.0334886
33.145	-3.50491	0.954445	0.23545	0.104043	-0.0417489	-0.0330087
35.102	-3.49945	0.954054	0.234657	0.103975	-0.0415146	-0.0325241
37.058	-3.49383	0.953627	0.23385	0.103903	-0.0412772	-0.032035
39.015	-3.48803	0.953164	0.23303	0.103826	-0.0410366	-0.0315411
40.971	-3.48207	0.952665	0.232196	0.103745	-0.040793	-0.0310425
42.928	-3.47593	0.95213	0.231347	0.10366	-0.0405462	-0.0305393
44.884	-3.46963	0.951559	0.230485	0.103571	-0.0402962	-0.0300314
46.84	-3.46315	0.950952	0.229609	0.103478	-0.0400431	-0.0295188
48.797	-3.45651	0.950308	0.228719	0.103381	-0.0397869	-0.0290015
50.753	-3.44969	0.949628	0.227815	0.103279	-0.0395275	-0.0284795
52.71	-3.4427	0.948911	0.226897	0.103173	-0.0392649	-0.0279528
54.666	-3.43554	0.948158	0.225965	0.103064	-0.0389992	-0.0274213
56.623	-3.42821	0.947367	0.225018	0.102949	-0.0387303	-0.0268851
58.579	-3.4207	0.94654	0.224058	0.102831	-0.0384581	-0.0263442
60.536	-3.41302	0.945675	0.223083	0.102709	-0.0381828	-0.0257985
62.492	-3.40516	0.944773	0.222094	0.102582	-0.0379043	-0.025248
64.449	-3.39713	0.943834	0.221091	0.10245	-0.0376225	-0.0246927
66.405	-3.38892	0.942856	0.220074	0.102315	-0.0373376	-0.0241326
68.362	-3.38053	0.941841	0.219042	0.102175	-0.0370493	-0.0235678
70.318	-3.37197	0.940788	0.217995	0.102031	-0.0367579	-0.0229981
72.275	-3.36323	0.939697	0.216934	0.101883	-0.0364632	-0.0224237
74.231	-3.35431	0.938568	0.215859	0.10173	-0.0361652	-0.0218444
76.188	-3.34521	0.9374	0.214769	0.101573	-0.035864	-0.0212603
78.144	-3.33593	0.936194	0.213665	0.101411	-0.0355596	-0.0206714
80.1	-3.32647	0.934949	0.212546	0.101245	-0.0352518	-0.0200777
82.057	-3.31683	0.933665	0.211412	0.101075	-0.0349408	-0.0194791
84.013	-3.30701	0.932342	0.210264	0.1009	-0.0346265	-0.0188757
85.97	-3.297	0.930981	0.209101	0.10072	-0.0343089	-0.0182674
87.926	-3.28682	0.92958	0.207924	0.100537	-0.0339881	-0.0176544
89.883	-3.27645	0.92814	0.206732	0.100349	-0.0336639	-0.0170364
91.839	-3.26591	0.926662	0.205525	0.100156	-0.0333365	-0.0164137
93.796	-3.25518	0.925145	0.204304	0.0999589	-0.0330058	-0.0157861
95.752	-3.24427	0.923588	0.203067	0.0997574	-0.0326718	-0.0151537
97.709	-3.23318	0.921993	0.201817	0.0995515	-0.0323346	-0.0145165
99.665	-3.22191	0.920358	0.200551	0.0993411	-0.031994	-0.0138745
101.62	-3.21045	0.918684	0.199271	0.0991262	-0.0316502	-0.0132276
103.58	-3.19881	0.916971	0.197976	0.0989069	-0.0313031	-0.0125759
105.53	-3.18699	0.915219	0.196667	0.0986831	-0.0309527	-0.0119193
107.49	-3.17499	0.913428	0.195343	0.0984549	-0.030599	-0.0112579
109.45	-3.16281	0.911597	0.194004	0.0982221	-0.030242	-0.0105917
111.4	-3.15044	0.909726	0.19265	0.0979849	-0.0298817	-0.00992067
113.36	-3.1379	0.907817	0.191282	0.0977432	-0.0295182	-0.0092448
115.32	-3.12516	0.905868	0.189899	0.097497	-0.0291513	-0.00856412
117.27	-3.11225	0.90388	0.188501	0.0972464	-0.0287812	-0.00787864
119.23	-3.09916	0.901853	0.187089	0.0969913	-0.0284079	-0.00718836
121.13	-3.08589	0.899786	0.185662	0.0967317	-0.0280312	-0.0064933
122.73	-3.07243	0.89768	0.18422	0.0964677	-0.0276513	-0.00579347
124.31	-3.05879	0.895536	0.182764	0.0961993	-0.0272682	-0.00508887
125.9	-3.04498	0.893352	0.181294	0.0959264	-0.0268818	-0.00437953
127.49	-3.03098	0.891129	0.179809	0.095649	-0.0264922	-0.00366546
129.05	-3.0168	0.888867	0.178309	0.0953673	-0.0260993	-0.00294667
130.61	-3.00245	0.886566	0.176795	0.0950811	-0.0257032	-0.00222318
132.16	-2.98791	0.884227	0.175266	0.0947905	-0.0253039	-0.00149499
133.7	-2.9732	0.881849	0.173724	0.0944956	-0.0249015	-0.000762141
135.23	-2.95831	0.879432	0.172167	0.0941963	-0.0244958	-2.46444e-05
136.76	-2.94325	0.876978	0.170596	0.0938926	-0.024087	0.000717475
138.28	-2.92801	0.874485	0.16901	0.0935846	-0.0236751	0.0014642
139.79	-2.9126	0.871955	0.167411	0.0932723	-0.02326	0.00221553
141.3	-2.89701	0.869386	0.165797	0.0929557	-0.0228417	0.00297144
142.8	-2.88125	0.866779	0.16417	0.0926348	-0.0224203	0.00373192
144.29	-2.86531	0.864134	0.162528	0.0923095	-0.0219958	0.00449697
145.77	-2.8492	0.861451	0.160872	0.0919799	-0.0215682	0.00526657
147.24	-2.83291	0.858731	0.159202	0.091646	-0.0211374	0.00604072
148.71	-2.81645	0.855972	0.157519	0.0913078	-0.0207035	0.00681942
150.16	-2.79981	0.853175	0.155821	0.0909653	-0.0202665	0.00760267
151.59	-2.783	0.850339	0.154109	0.0906185	-0.0198264	0.00839044
152.89	-2.76602	0.847466	0.152383	0.0902673	-0.0193832	0.00918274
154.18	-2.74886	0.844555	0.150643	0.0899118	-0.0189368	0.00997953
155.47	-2.73153	0.841606	0.148889	0.089552	-0.0184874	0.0107808
156.76	-2.71403	0.838618	0.147121	0.0891879	-0.0180349	0.0115866
158.07	-2.69635	0.835592	0.145339	0.0888195	-0.0175792	0.0123969
159.38	-2.67849	0.832528	0.143543	0.0884466	-0.0171205	0.0132117
160.71	-2.66046	0.829425	0.141733	0.0880695	-0.0166586	0.0140309
162.05	-2.64226	0.826284	0.13991	0.087688	-0.0161937	0.0148547
163.37	-2.62387	0.823104	0.138072	0.0873021	-0.0157256	0.0156829
164.66	-2.60532	0.819886	0.13622	0.0869119	-0.0152545	0.0165155
165.93	-2.58659	0.816629	0.134354	0.0865173	-0.0147802	0.0173527
167.19	-2.56768	0.813334	0.132474	0.0861184	-0.0143029	0.0181942
168.43	-2.5486	0.810001	0.13058	0.0857151	-0.0138225	0.0190402
169.66	-2.52935	0.806629	0.128672	0.0853075	-0.0133391	0.0198906
170.88	-2.50993	0.803219	0.126751	0.0848956	-0.0128526	0.0207453
172.09	-2.49033	0.79977	0.124816	0.0844793	-0.012363	0.0216045
173.28	-2.47055	0.796283	0.122866	0.0840587	-0.0118704	0.0224681
174.47	-2.4506	0.792757	0.120903	0.0836337	-0.0113747	0.023336
175.65	-2.43048	0.789192	0.118926	0.0832043	-0.0108759	0.0242084
176.83	-2.41018	0.785589	0.116935	0.0827706	-0.0103741	0.0250852
178	-2.3897	0.781947	0.11493	0.0823324	-0.00986921	0.0259663
179.16	-2.36905	0.778266	0.112911	0.0818899	-0.00936123	0.0268518
180.32	-2.34823	0.774545	0.110878	0.081443	-0.00885018	0.0277418
181.48	-2.32722	0.770786	0.108831	0.0809917	-0.00833606	0.0286361
182.64	-2.30605	0.766988	0.10677	0.0805359	-0.00781889	0.0295347
183.79	-2.28469	0.763151	0.104695	0.0800758	-0.00729867	0.0304377
184.95	-2.26316	0.759275	0.102606	0.0796113	-0.00677541	0.0313451
186.1	-2.24146	0.75536	0.100504	0.0791425	-0.00624912	0.0322567
187.26	-2.21958	0.751406	0.0983874	0.0786692	-0.0057198	0.0331726
188.42	-2.19753	0.747413	0.0962573	0.0781916	-0.00518746	0.0340928
189.58	-2.17531	0.743381	0.0941135	0.0777095	-0.00465213	0.0350173
190.74	-2.15291	0.739311	0.091956	0.0772232	-0.00411381	0.035946
191.93	-2.13034	0.735202	0.0897848	0.0767325	-0.0035725	0.0368789
193.13	-2.1076	0.731054	0.0876001	0.0762375	-0.00302824	0.037816
194.27	-2.08468	0.726869	0.0854019	0.0757381	-0.00248104	0.0387572
195.38	-2.0616	0.722645	0.0831904	0.0752345	-0.00193091	0.0397025
196.5	-2.03835	0.718383	0.0809655	0.0747266	-0.00137789	0.040652
197.6	-2.01493	0.714084	0.0787275	0.0742145	-0.000822002	0.0416054
198.69	-1.99134	0.709747	0.0764763	0.0736982	-0.000263257	0.0425629
199.76	-1.96759	0.705372	0.0742121	0.0731777	0.000298328	0.0435243
200.83	-1.94367	0.700961	0.0719348	0.072653	0.000862743	0.0444897
201.88	-1.91959	0.696512	0.0696446	0.0721241	0.00142998	0.0454591
202.92	-1.89534	0.692025	0.0673414	0.071591	0.00200002	0.0464324
203.95	-1.87093	0.687501	0.0650253	0.0710538	0.00257287	0.0474096
204.98	-1.84635	0.68294	0.0626962	0.0705124	0.00314851	0.0483907
206	-1.82161	0.678342	0.0603543	0.0699668	0.00372695	0.0493756
207.01	-1.7967	0.673706	0.0579995	0.069417	0.00430816	0.0503645
208.03	-1.77163	0.669033	0.0556319	0.068863	0.00489214	0.0513571
209.03	-1.7464	0.664323	0.0532516	0.0683049	0.00547887	0.0523536
210.04	-1.721	0.659576	0.0508587	0.0677426	0.00606831	0.0533538
211.04	-1.69545	0.654792	0.0484532	0.0671763	0.00666046	0.0543578
212.05	-1.66973	0.649971	0.0460351	0.0666058	0.00725531	0.0553655
213.05	-1.64385	0.645113	0.0436046	0.0660312	0.00785285	0.0563769
214.06	-1.61781	0.640219	0.0411616	0.0654526	0.00845305	0.0573919
215.06	-1.59161	0.635288	0.0387063	0.0648698	0.00905591	0.0584105
216.05	-1.56525	0.63032	0.0362386	0.064283	0.0096614	0.0594328
217.04	-1.53873	0.625316	0.0337587	0.0636921	0.0102695	0.0604587
218.02	-1.51206	0.620275	0.0312665	0.0630972	0.0108803	0.0614881
219.01	-1.48523	0.615199	0.0287622	0.0624982	0.0114936	0.062521
220	-1.45824	0.610086	0.0262458	0.0618952	0.0121095	0.0635575
221	-1.43109	0.604937	0.0237174	0.0612882	0.012728	0.0645974
222	-1.40379	0.599752	0.0211772	0.0606772	0.013349	0.0656407
223.01	-1.37634	0.594532	0.0186251	0.0600623	0.0139725	0.0666875
224.03	-1.34873	0.589276	0.0160613	0.0594434	0.0145985	0.0677376
225.03	-1.32097	0.583985	0.0134856	0.0588206	0.015227	0.0687911
226.03	-1.29306	0.578658	0.0108983	0.0581939	0.0158581	0.0698479
227.02	-1.265	0.573296	0.00829926	0.0575632	0.0164915	0.0709081
228	-1.23678	0.567898	0.0056886	0.0569286	0.0171275	0.0719716
228.98	-1.20842	0.562465	0.0030663	0.0562901	0.0177659	0.0730384
229.96	-1.1799	0.556997	0.000432393	0.0556476	0.0184068	0.0741084
230.92	-1.15123	0.551493	-0.00221308	0.0550013	0.0190501	0.0751818
231.89	-1.12241	0.545955	-0.00487004	0.054351	0.0196959	0.0762583
232.85	-1.09344	0.540381	-0.00753841	0.0536969	0.0203441	0.0773381
233.81	-1.06432	0.534772	-0.0102181	0.053039	0.0209946	0.0784211
234.77	-1.03506	0.529129	-0.012909	0.0523772	0.0216475	0.0795071
235.71	-1.00565	0.523452	-0.0156111	0.0517116	0.0223028	0.0805964
236.63	-0.976092	0.51774	-0.0183243	0.0510422	0.0229604	0.0816886
237.56	-0.946391	0.511994	-0.0210485	0.050369	0.0236203	0.082784
238.51	-0.916547	0.506213	-0.0237836	0.0496921	0.0242825	0.0838823
239.47	-0.886561	0.5004	-0.0265295	0.0490115	0.024947	0.0849836
240.41	-0.856433	0.494552	-0.0292863	0.0483271	0.0256137	0.0860879
241.34	-0.826164	0.488671	-0.0320537	0.0476391	0.0262827	0.0871951
242.26	-0.795755	0.482757	-0.0348318	0.0469474	0.0269539	0.0883052
243.17	-0.765208	0.47681	-0.0376203	0.0462521	0.0276273	0.0894182
244.07	-0.734524	0.47083	-0.0404193	0.0455532	0.0283028	0.0905339
244.96	-0.703705	0.464817	-0.0432285	0.0448507	0.0289805	0.0916525
245.86	-0.672751	0.458773	-0.046048	0.0441446	0.0296604	0.0927738
246.75	-0.641664	0.452696	-0.0488776	0.043435	0.0303423	0.0938979
247.65	-0.610444	0.446587	-0.0517173	0.0427219	0.0310263	0.0950246
248.55	-0.579091	0.440447	-0.0545669	0.0420053	0.0317124	0.096154
249.46	-0.547608	0.434274	-0.0574265	0.0412853	0.0324006	0.097286
250.37	-0.515993	0.42807	-0.060296	0.0405617	0.0330908	0.0984207
251.31	-0.484248	0.421835	-0.0631754	0.0398347	0.033783	0.0995579
252.26	-0.452373	0.415568	-0.0660646	0.0391043	0.0344773	0.100698
253.21	-0.420368	0.409269	-0.0689636	0.0383703	0.0351736	0.10184
254.16	-0.388235	0.402939	-0.0718722	0.037633	0.0358719	0.102985
255.11	-0.355974	0.396578	-0.0747905	0.0368922	0.0365721	0.104133
256.05	-0.323586	0.390186	-0.0777183	0.0361481	0.0372743	0.105282
256.99	-0.291072	0.383763	-0.0806556	0.0354006	0.0379785	0.106435
257.93	-0.258433	0.377309	-0.0836023	0.0346497	0.0386846	0.10759
258.85	-0.225668	0.370824	-0.0865583	0.0338955	0.0393926	0.108747
259.76	-0.192779	0.364309	-0.0895237	0.0331379	0.0401025	0.109906
260.66	-0.159766	0.357763	-0.0924983	0.0323769	0.0408143	0.111068
261.55	-0.126629	0.351187	-0.0954822	0.0316127	0.0415279	0.112232
262.43	-0.0933705	0.34458	-0.0984751	0.0308452	0.0422434	0.113399
263.31	-0.0599894	0.337943	-0.101477	0.0300743	0.0429608	0.114567
264.19	-0.0264869	0.331276	-0.104488	0.0293002	0.04368	0.115738
265.07	0.00713602	0.324579	-0.107508	0.0285228	0.0444009	0.116911
265.95	0.0408784	0.317852	-0.110537	0.0277422	0.0451237	0.118087
266.83	0.0747392	0.311095	-0.113575	0.0269583	0.0458483	0.119264
267.72	0.108718	0.304309	-0.116622	0.0261712	0.0465746	0.120444
268.62	0.142814	0.297493	-0.119677	0.025381	0.0473027	0.121626
269.52	0.177028	0.290648	-0.122741	0.0245875	0.0480326	0.122809
270.4	0.211358	0.283774	-0.125813	0.0237909	0.0487641	0.123995
271.26	0.245804	0.27687	-0.128895	0.0229911	0.0494974	0.125183
272.18	0.280366	0.269937	-0.131984	0.0221881	0.0502324	0.126373
273.13	0.315044	0.262975	-0.135083	0.0213819	0.0509692	0.127566
274.08	0.349837	0.255983	-0.13819	0.0205726	0.0517076	0.12876
275.03	0.384745	0.248963	-0.141305	0.0197601	0.0524477	0.129956
275.98	0.419767	0.241913	-0.144429	0.0189445	0.0531895	0.131154
276.92	0.454902	0.234835	-0.147561	0.0181258	0.0539329	0.132354
277.87	0.490148	0.227728	-0.150701	0.017304	0.054678	0.133556
278.82	0.525505	0.220593	-0.153849	0.0164792	0.0554247	0.13476
279.76	0.560971	0.213429	-0.157006	0.0156513	0.0561729	0.135965
280.7	0.596546	0.206238	-0.16017	0.0148204	0.0569228	0.137173
281.64	0.632229	0.199019	-0.163343	0.0139865	0.0576741	0.138382
282.58	0.668017	0.191772	-0.166523	0.0131496	0.058427	0.139593
283.52	0.70391	0.184498	-0.16971	0.0123098	0.0591814	0.140805
284.47	0.739907	0.177196	-0.172905	0.0114671	0.0599372	0.142019
285.42	0.776005	0.169868	-0.176108	0.0106215	0.0606945	0.143235
286.38	0.812204	0.162514	-0.179318	0.00977304	0.0614532	0.144453
287.35	0.848502	0.155133	-0.182535	0.00892182	0.0622132	0.145671
288.32	0.884896	0.147726	-0.185759	0.00806785	0.0629746	0.146892
289.29	0.921384	0.140295	-0.188989	0.00721117	0.0637372	0.148113
290.25	0.957966	0.132838	-0.192227	0.00635182	0.0645012	0.149336
291.22	0.994639	0.125356	-0.195471	0.00548984	0.0652663	0.15056
292.18	1.0314	0.11785	-0.198721	0.00462525	0.0660327	0.151786
293.14	1.06825	0.110319	-0.201978	0.00375809	0.0668003	0.153012
294.1	1.10519	0.102764	-0.205241	0.00288839	0.067569	0.15424
295.05	1.14222	0.0951861	-0.20851	0.00201617	0.0683388	0.155469
296.01	1.17933	0.0875842	-0.211785	0.00114147	0.0691097	0.156699
296.96	1.21652	0.0799588	-0.215066	0.000264299	0.0698817	0.157929
297.92	1.25379	0.0723104	-0.218353	-0.000615299	0.0706547	0.159161
298.87	1.29115	0.0646393	-0.221645	-0.00149728	0.0714288	0.160394
299.82	1.32858	0.0569458	-0.224943	-0.0023816	0.0722038	0.161627
300.76	1.36609	0.0492305	-0.228246	-0.0032682	0.0729797	0.162862
301.69	1.40367	0.0414936	-0.231553	-0.00415705	0.0737565	0.164097
302.63	1.44132	0.0337355	-0.234866	-0.00504811	0.0745341	0.165332
303.56	1.47905	0.0259566	-0.238184	-0.00594133	0.0753125	0.166568
304.48	1.51684	0.0181571	-0.241506	-0.00683666	0.0760917	0.167805
305.4	1.5547	0.0103376	-0.244833	-0.00773407	0.0768716	0.169042
306.3	1.59262	0.0024983	-0.248163	-0.00863351	0.0776522	0.17028
307.21	1.6306	-0.00536049	-0.251498	-0.00953494	0.0784335	0.171518
308.11	1.66865	-0.0132385	-0.254837	-0.0104383	0.0792153	0.172756
309.01	1.70675	-0.0211352	-0.25818	-0.0113436	0.0799978	0.173994
309.91	1.74492	-0.0290504	-0.261526	-0.0122508	0.0807808	0.175232
310.79	1.78313	-0.0369835	-0.264876	-0.0131598	0.0815643	0.176471
311.68	1.8214	-0.0449343	-0.26823	-0.0140706	0.0823483	0.17771
312.55	1.85972	-0.0529023	-0.271586	-0.0149831	0.0831327	0.178948
313.42	1.89809	-0.0608873	-0.274945	-0.0158973	0.0839175	0.180187
314.29	1.93651	-0.068889	-0.278308	-0.0168132	0.0847027	0.181425
315.16	1.97497	-0.0769071	-0.281673	-0.0177307	0.0854882	0.182664
316.03	2.01348	-0.0849412	-0.285041	-0.0186498	0.0862741	0.183902
316.9	2.05203	-0.0929912	-0.288411	-0.0195705	0.0870602	0.185139
317.77	2.09063	-0.101057	-0.291784	-0.0204927	0.0878466	0.186377
318.64	2.12927	-0.109138	-0.295159	-0.0214165	0.0886333	0.187614
319.52	2.16794	-0.117234	-0.298537	-0.0223417	0.0894201	0.188851
320.41	2.20665	-0.125345	-0.301916	-0.0232683	0.0902071	0.190087
321.29	2.2454	-0.13347	-0.305298	-0.0241963	0.0909943	0.191323
322.18	2.28418	-0.141609	-0.308681	-0.0251256	0.0917815	0.192559
323.06	2.32299	-0.149761	-0.312066	-0.0260563	0.0925688	0.193794
323.93	2.36183	-0.157926	-0.315452	-0.0269881	0.0933561	0.195028
324.8	2.40069	-0.166103	-0.318839	-0.0279211	0.0941433	0.196261
325.66	2.43958	-0.174293	-0.322227	-0.0288552	0.0949305	0.197493
326.51	2.47848	-0.182494	-0.325615	-0.0297903	0.0957175	0.198725
327.36	2.51741	-0.190706	-0.329004	-0.0307265	0.0965043	0.199955
328.2	2.55635	-0.198928	-0.332394	-0.0316636	0.0972908	0.201185
329.04	2.59531	-0.207161	-0.335784	-0.0326016	0.0980771	0.202413
329.88	2.63427	-0.215404	-0.339174	-0.0335405	0.0988632	0.20364
330.72	2.67325	-0.223656	-0.342563	-0.0344801	0.0996488	0.204866
331.56	2.71223	-0.231917	-0.345952	-0.0354205	0.100434	0.206091
332.4	2.75122	-0.240186	-0.349341	-0.0363616	0.101219	0.207314
333.24	2.79021	-0.248463	-0.352729	-0.0373033	0.102003	0.208536
334.09	2.8292	-0.256747	-0.356116	-0.0382456	0.102787	0.209756
334.94	2.86818	-0.265038	-0.359501	-0.0391884	0.10357	0.210974
335.81	2.90717	-0.273336	-0.362886	-0.0401317	0.104353	0.212191
336.67	2.94614	-0.281641	-0.366269	-0.0410754	0.105135	0.213407
337.54	2.98511	-0.289951	-0.36965	-0.0420195	0.105916	0.21462
338.41	3.02406	-0.298267	-0.37303	-0.042964	0.106697	0.215832
339.29	3.06301	-0.306588	-0.376407	-0.0439088	0.107476	0.217042
340.16	3.10195	-0.314915	-0.379783	-0.044854	0.108255	0.21825
341.03	3.14087	-0.323246	-0.383157	-0.0457994	0.109034	0.219456
341.89	3.17977	-0.331582	-0.386528	-0.046745	0.109811	0.220659
342.74	3.21865	-0.339922	-0.389897	-0.0476908	0.110588	0.221861
343.58	3.25752	-0.348266	-0.393264	-0.0486368	0.111363	0.223061
344.42	3.29636	-0.356613	-0.396627	-0.0495828	0.112138	0.224259
345.25	3.33518	-0.364963	-0.399988	-0.0505289	0.112911	0.225454
346.07	3.37398	-0.373316	-0.403346	-0.051475	0.113684	0.226647
346.9	3.41274	-0.381672	-0.4067	-0.0524211	0.114456	0.227837
347.72	3.45148	-0.39003	-0.410051	-0.0533672	0.115226	0.229025
348.54	3.49019	-0.398389	-0.413399	-0.0543132	0.115995	0.230211
349.36	3.52887	-0.406751	-0.416743	-0.0552591	0.116764	0.231394
350.18	3.56751	-0.415114	-0.420084	-0.0562049	0.117531	0.232574
351.01	3.60612	-0.423479	-0.42342	-0.0571505	0.118296	0.233752
351.83	3.6447	-0.431844	-0.426753	-0.0580959	0.119061	0.234927
352.66	3.68324	-0.44021	-0.430082	-0.059041	0.119824	0.2361
353.5	3.72174	-0.448577	-0.433406	-0.0599859	0.120586	0.23727
354.34	3.7602	-0.456944	-0.436727	-0.0609306	0.121347	0.238436
355.17	3.79862	-0.465311	-0.440043	-0.0618749	0.122106	0.239601
356	3.837	-0.473678	-0.443354	-0.0628189	0.122864	0.240762
356.82	3.87534	-0.482045	-0.446661	-0.0637626	0.123621	0.24192
357.63	3.91363	-0.490412	-0.449964	-0.0647059	0.124376	0.243075
358.44	3.95188	-0.498779	-0.453262	-0.0656489	0.12513	0.244228
359.23	3.99009	-0.507145	-0.456556	-0.0665916	0.125882	0.245377
360.02	4.02826	-0.515511	-0.459845	-0.0675338	0.126633	0.246524
360.8	4.06638	-0.523877	-0.463129	-0.0684757	0.127383	0.247667
361.58	4.10445	-0.532241	-0.466408	-0.0694172	0.128131	0.248808
362.36	4.14248	-0.540605	-0.469682	-0.0703582	0.128877	0.249945
363.13	4.18045	-0.548967	-0.472951	-0.0712987	0.129622	0.251079
363.9	4.21838	-0.557328	-0.476214	-0.0722386	0.130366	0.25221
364.68	4.25625	-0.565686	-0.479473	-0.0731781	0.131108	0.253337
365.45	4.29407	-0.574043	-0.482725	-0.0741169	0.131848	0.254461
366.23	4.33183	-0.582397	-0.485972	-0.0750551	0.132586	0.255582
367.01	4.36953	-0.590748	-0.489213	-0.0759927	0.133323	0.256699
367.79	4.40718	-0.599096	-0.492448	-0.0769295	0.134058	0.257813
368.58	4.44476	-0.607441	-0.495677	-0.0778657	0.134791	0.258923
369.37	4.48229	-0.615783	-0.4989	-0.0788011	0.135523	0.260029
370.17	4.51975	-0.62412	-0.502117	-0.0797356	0.136252	0.261132
370.97	4.55714	-0.632453	-0.505326	-0.0806693	0.13698	0.262231
371.76	4.59446	-0.640782	-0.508529	-0.0816021	0.137706	0.263326
372.54	4.63171	-0.649105	-0.511725	-0.082534	0.13843	0.264417
373.32	4.6689	-0.657423	-0.514914	-0.0834649	0.139151	0.265505
374.09	4.70601	-0.665735	-0.518096	-0.0843948	0.139871	0.266588
374.85	4.74304	-0.674041	-0.521271	-0.0853236	0.140589	0.267667
375.6	4.78	-0.682342	-0.524438	-0.0862515	0.141304	0.268742
376.36	4.81688	-0.690637	-0.527598	-0.0871782	0.142018	0.269813
377.11	4.85369	-0.698925	-0.53075	-0.088104	0.142729	0.27088
377.86	4.89042	-0.707208	-0.533895	-0.0890286	0.143438	0.271943
378.61	4.92708	-0.715484	-0.537032	-0.0899522	0.144145	0.273002
379.35	4.96365	-0.723755	-0.540161	-0.0908747	0.14485	0.274056
380.1	5.00015	-0.732018	-0.543283	-0.091796	0.145553	0.275106
380.85	5.03656	-0.740275	-0.546396	-0.0927161	0.146254	0.276151
381.61	5.07289	-0.748524	-0.549502	-0.093635	0.146952	0.277193
382.37	5.10914	-0.756766	-0.552599	-0.0945528	0.147648	0.278229
383.13	5.1453	-0.765001	-0.555687	-0.0954692	0.148341	0.279261
383.9	5.18137	-0.773228	-0.558768	-0.0963844	0.149032	0.280289
384.67	5.21736	-0.781447	-0.56184	-0.0972984	0.149721	0.281312
385.45	5.25326	-0.789659	-0.564903	-0.098211	0.150407	0.28233
386.24	5.28907	-0.797862	-0.567957	-0.0991223	0.151091	0.283344
387.04	5.32479	-0.806057	-0.571003	-0.100032	0.151773	0.284352
387.84	5.36042	-0.814243	-0.57404	-0.100941	0.152452	0.285356
388.62	5.39596	-0.822421	-0.577067	-0.101848	0.153128	0.286356
389.39	5.4314	-0.83059	-0.580086	-0.102754	0.153802	0.28735
390.15	5.46674	-0.83875	-0.583095	-0.103658	0.154474	0.288339
390.91	5.50199	-0.846899	-0.586094	-0.104561	0.155142	0.289323
391.66	5.53714	-0.855039	-0.589084	-0.105462	0.155808	0.290302
392.41	5.57219	-0.86317	-0.592065	-0.106361	0.156472	0.291277
393.16	5.60713	-0.87129	-0.595035	-0.107259	0.157133	0.292246
393.9	5.64198	-0.8794	-0.597996	-0.108156	0.157791	0.293209
394.65	5.67673	-0.8875	-0.600947	-0.109051	0.158446	0.294168
395.4	5.71137	-0.89559	-0.603888	-0.109944	0.159099	0.295121
396.15	5.74591	-0.90367	-0.606819	-0.110836	0.159748	0.29607
396.89	5.78034	-0.911738	-0.60974	-0.111726	0.160396	0.297012
397.62	5.81467	-0.919796	-0.612651	-0.112614	0.16104	0.29795
398.35	5.84889	-0.927843	-0.615551	-0.113501	0.161681	0.298882
399.07	5.88301	-0.935879	-0.618441	-0.114386	0.16232	0.299809
399.79	5.91701	-0.943903	-0.62132	-0.115269	0.162955	0.30073
400.51	5.9509	-0.951915	-0.624189	-0.116151	0.163588	0.301645
401.22	5.98468	-0.959915	-0.627046	-0.11703	0.164218	0.302555
401.93	6.01834	-0.967903	-0.629893	-0.117908	0.164845	0.30346
402.64	6.05189	-0.975878	-0.632728	-0.118784	0.165468	0.304358
403.35	6.08532	-0.98384	-0.635553	-0.119658	0.166089	0.305251
404.06	6.11862	-0.991788	-0.638365	-0.120529	0.166706	0.306138
404.77	6.15181	-0.999724	-0.641167	-0.121399	0.167321	0.307019
405.48	6.18488	-1.00764	-0.643956	-0.122267	0.167932	0.307894
406.18	6.21782	-1.01555	-0.646734	-0.123133	0.16854	0.308763
406.89	6.25063	-1.02344	-0.649499	-0.123997	0.169145	0.309626
407.59	6.28331	-1.03132	-0.652253	-0.124858	0.169746	0.310483
408.3	6.31586	-1.03918	-0.654994	-0.125717	0.170345	0.311334
409	6.34828	-1.04703	-0.657722	-0.126574	0.170939	0.312178
409.7	6.38056	-1.05486	-0.660438	-0.127429	0.171531	0.313016
410.41	6.41271	-1.06268	-0.663141	-0.128281	0.172119	0.313848
411.11	6.44473	-1.07047	-0.665832	-0.129132	0.172703	0.314674
411.82	6.47661	-1.07826	-0.668509	-0.129979	0.173285	0.315493
412.52	6.50835	-1.08602	-0.671174	-0.130825	0.173862	0.316305
413.23	6.53996	-1.09377	-0.673826	-0.131668	0.174437	0.317111
413.94	6.57142	-1.10151	-0.676464	-0.132509	0.175007	0.317911
414.65	6.60275	-1.10922	-0.67909	-0.133347	0.175575	0.318704
415.36	6.63394	-1.11693	-0.681703	-0.134183	0.176138	0.319491
416.07	6.66499	-1.12461	-0.684302	-0.135017	0.176698	0.32027
416.78	6.6959	-1.13228	-0.686888	-0.135848	0.177255	0.321044
417.49	6.72667	-1.13993	-0.689461	-0.136677	0.177808	0.32181
418.2	6.7573	-1.14756	-0.69202	-0.137504	0.178357	0.32257
418.91	6.78778	-1.15518	-0.694565	-0.138328	0.178903	0.323323
419.62	6.81812	-1.16278	-0.697098	-0.139149	0.179445	0.32407
420.32	6.84832	-1.17036	-0.699617	-0.139968	0.179984	0.324809
421.02	6.87838	-1.17793	-0.702122	-0.140785	0.180519	0.325542
421.71	6.9083	-1.18548	-0.704613	-0.1416	0.18105	0.326268
422.41	6.93806	-1.19301	-0.707091	-0.142411	0.181577	0.326987
423.1	6.96769	-1.20053	-0.709555	-0.143221	0.182101	0.327699
423.79	6.99717	-1.20803	-0.712005	-0.144028	0.182621	0.328404
424.48	7.0265	-1.21551	-0.714441	-0.144832	0.183137	0.329102
425.17	7.05568	-1.22297	-0.716862	-0.145634	0.18365	0.329793
425.85	7.08471	-1.23042	-0.71927	-0.146433	0.184159	0.330477
426.54	7.11359	-1.23784	-0.721664	-0.14723	0.184663	0.331154
427.22	7.14233	-1.24525	-0.724043	-0.148024	0.185164	0.331824
427.9	7.17091	-1.25265	-0.726408	-0.148816	0.185662	0.332487
428.58	7.19935	-1.26002	-0.728759	-0.149605	0.186155	0.333142
429.26	7.22764	-1.26738	-0.731096	-0.150392	0.186645	0.333791
429.94	7.25578	-1.27472	-0.733418	-0.151176	0.18713	0.334432
430.62	7.28377	-1.28204	-0.735726	-0.151958	0.187612	0.335066
431.3	7.31161	-1.28935	-0.73802	-0.152737	0.18809	0.335692
431.98	7.3393	-1.29664	-0.7403	-0.153513	0.188564	0.336312
432.66	7.36684	-1.3039	-0.742564	-0.154287	0.189035	0.336924
433.33	7.39422	-1.31116	-0.744814	-0.155058	0.189501	0.337529
434.01	7.42145	-1.31839	-0.74705	-0.155827	0.189963	0.338126
434.69	7.44852	-1.32561	-0.74927	-0.156593	0.190421	0.338716
435.37	7.47544	-1.3328	-0.751475	-0.157357	0.190876	0.339298
436.05	7.5022	-1.33998	-0.753666	-0.158117	0.191326	0.339873
436.73	7.5288	-1.34714	-0.755841	-0.158875	0.191772	0.34044
437.41	7.55524	-1.35428	-0.758001	-0.15963	0.192214	0.340999
438.09	7.58152	-1.3614	-0.760145	-0.160383	0.192652	0.341551
438.77	7.60763	-1.3685	-0.762273	-0.161132	0.193085	0.342095
439.46	7.63357	-1.37558	-0.764386	-0.161879	0.193515	0.342631
440.14	7.65935	-1.38264	-0.766483	-0.162623	0.19394	0.343159
440.83	7.68495	-1.38968	-0.768563	-0.163364	0.19436	0.343679
441.52	7.71038	-1.39669	-0.770627	-0.164101	0.194777	0.344191
442.2	7.73564	-1.40369	-0.772674	-0.164836	0.195188	0.344694
442.89	7.76072	-1.41066	-0.774704	-0.165567	0.195596	0.34519
443.57	7.78561	-1.41761	-0.776718	-0.166296	0.195999	0.345677
444.25	7.81033	-1.42454	-0.778714	-0.167021	0.196397	0.346156
444.93	7.83487	-1.43144	-0.780693	-0.167743	0.196791	0.346626
445.6	7.85922	-1.43832	-0.782655	-0.168462	0.19718	0.347088
446.27	7.88339	-1.44518	-0.7846	-0.169177	0.197565	0.347541
446.94	7.90738	-1.45201	-0.786527	-0.169889	0.197945	0.347986
447.61	7.93118	-1.45882	-0.788436	-0.170598	0.19832	0.348422
448.27	7.95478	-1.46561	-0.790328	-0.171304	0.19869	0.34885
448.93	7.9782	-1.47237	-0.792201	-0.172006	0.199056	0.349268
449.59	8.00142	-1.47911	-0.794056	-0.172704	0.199417	0.349678
450.24	8.02444	-1.48582	-0.795893	-0.1734	0.199773	0.350079
450.89	8.04727	-1.4925	-0.79771	-0.174091	0.200124	0.35047
451.55	8.06989	-1.49916	-0.799509	-0.174779	0.20047	0.350853
452.2	8.09231	-1.50579	-0.801289	-0.175463	0.200811	0.351226
452.84	8.11453	-1.5124	-0.803049	-0.176144	0.201147	0.35159
453.49	8.13654	-1.51898	-0.80479	-0.17682	0.201477	0.351945
454.14	8.15834	-1.52553	-0.806512	-0.177493	0.201803	0.35229
454.78	8.17993	-1.53205	-0.808213	-0.178162	0.202123	0.352626
455.42	8.2013	-1.53854	-0.809895	-0.178827	0.202438	0.352952
456.07	8.22246	-1.545	-0.811556	-0.179489	0.202748	0.353269
456.71	8.24339	-1.55144	-0.813197	-0.180146	0.203052	0.353576
457.35	8.26411	-1.55784	-0.814817	-0.180799	0.203351	0.353872
457.99	8.28459	-1.56421	-0.816416	-0.181448	0.203645	0.354159
458.63	8.30486	-1.57056	-0.817994	-0.182092	0.203933	0.354436
459.27	8.32489	-1.57687	-0.819551	-0.182733	0.204215	0.354703
459.91	8.3447	-1.58315	-0.821086	-0.183369	0.204492	0.35496
460.55	8.36427	-1.58939	-0.8226	-0.184001	0.204763	0.355206
461.18	8.38361	-1.59561	-0.824092	-0.184629	0.205029	0.355443
461.82	8.40271	-1.60179	-0.825562	-0.185252	0.205288	0.355669
462.46	8.42158	-1.60794	-0.82701	-0.185871	0.205542	0.355884
463.1	8.4402	-1.61406	-0.828436	-0.186485	0.205791	0.356089
463.74	8.45858	-1.62014	-0.829839	-0.187095	0.206033	0.356284
464.39	8.47672	-1.62619	-0.831219	-0.1877	0.206269	0.356468
465.03	8.4946	-1.6322	-0.832577	-0.188301	0.2065	0.356641
465.71	8.51223	-1.63818	-0.83391	-0.188896	0.206724	0.356803
466.39	8.5296	-1.64412	-0.835221	-0.189487	0.206942	0.356954
467.07	8.54672	-1.65002	-0.836507	-0.190073	0.207154	0.357094
467.76	8.56356	-1.65589	-0.837769	-0.190654	0.20736	0.357223
468.44	8.58014	-1.66171	-0.839006	-0.19123	0.207559	0.35734
469.11	8.59645	-1.6675	-0.840219	-0.1918	0.207752	0.357446
469.78	8.61249	-1.67325	-0.841406	-0.192366	0.207938	0.357541
470.45	8.62825	-1.67896	-0.842568	-0.192926	0.208118	0.357623
471.11	8.64373	-1.68462	-0.843705	-0.19348	0.208292	0.357694
471.78	8.65892	-1.69025	-0.844815	-0.19403	0.208458	0.357753
472.44	8.67382	-1.69583	-0.845899	-0.194573	0.208618	0.357801
473.11	8.68842	-1.70137	-0.846956	-0.195111	0.208771	0.357835
473.77	8.70273	-1.70686	-0.847986	-0.195643	0.208917	0.357858
474.44	8.71674	-1.71231	-0.848989	-0.196169	0.209056	0.357869
475.1	8.73045	-1.71772	-0.849964	-0.19669	0.209188	0.357866
475.77	8.74385	-1.72307	-0.850912	-0.197204	0.209313	0.357852
476.45	8.75694	-1.72839	-0.851832	-0.197713	0.209431	0.357825
477.12	8.76973	-1.73365	-0.852724	-0.198215	0.209541	0.357785
477.8	8.7822	-1.73887	-0.853587	-0.198712	0.209645	0.357732
478.49	8.79436	-1.74404	-0.854422	-0.199202	0.209741	0.357667
479.17	8.8062	-1.74917	-0.855229	-0.199686	0.20983	0.357588
479.86	8.81773	-1.75425	-0.856007	-0.200164	0.209911	0.357497
480.55	8.82893	-1.75928	-0.856755	-0.200636	0.209985	0.357393
481.24	8.83981	-1.76425	-0.857474	-0.201101	0.210051	0.357275
481.91	8.85036	-1.76918	-0.858164	-0.20156	0.21011	0.357144
482.57	8.86058	-1.77406	-0.858824	-0.202012	0.210162	0.357
483.22	8.87048	-1.7789	-0.859454	-0.202458	0.210206	0.356843
483.87	8.88004	-1.78368	-0.860054	-0.202897	0.210242	0.356671
484.5	8.88927	-1.7884	-0.860624	-0.20333	0.21027	0.356487
485.14	8.89816	-1.79308	-0.861163	-0.203757	0.210291	0.356288
485.77	8.90671	-1.79771	-0.861672	-0.204176	0.210303	0.356077
486.39	8.91492	-1.80229	-0.86215	-0.204589	0.210308	0.355851
487.02	8.92279	-1.80681	-0.862597	-0.204995	0.210306	0.355611
487.65	8.93032	-1.81128	-0.863013	-0.205395	0.210295	0.355358
488.29	8.9375	-1.8157	-0.863398	-0.205787	0.210276	0.35509
488.93	8.94433	-1.82006	-0.863751	-0.206173	0.210249	0.354808
489.58	8.95081	-1.82437	-0.864072	-0.206552	0.210214	0.354512
490.23	8.95693	-1.82863	-0.864361	-0.206924	0.210171	0.354202
490.89	8.96271	-1.83283	-0.864619	-0.207288	0.21012	0.353878
491.53	8.96813	-1.83698	-0.864845	-0.207646	0.210061	0.353539
492.17	8.9732	-1.84108	-0.865038	-0.207997	0.209993	0.353186
492.79	8.97791	-1.84512	-0.8652	-0.208341	0.209918	0.352819
493.4	8.98227	-1.84911	-0.865329	-0.208678	0.209834	0.352437
494.01	8.98627	-1.85304	-0.865426	-0.209009	0.209742	0.352041
494.61	8.98992	-1.85692	-0.865491	-0.209332	0.209641	0.35163
495.21	8.9932	-1.86074	-0.865523	-0.209647	0.209533	0.351205
495.81	8.99612	-1.86451	-0.865522	-0.209956	0.209416	0.350765
496.4	8.99868	-1.86822	-0.865488	-0.210258	0.20929	0.35031
497	9.00087	-1.87188	-0.865421	-0.210552	0.209156	0.34984
497.6	9.00269	-1.87548	-0.86532	-0.210839	0.209014	0.349355
498.2	9.00413	-1.87902	-0.865185	-0.211119	0.208863	0.348855
498.81	9.0052	-1.88251	-0.865017	-0.211391	0.208703	0.34834
499.43	9.00589	-1.88593	-0.864814	-0.211655	0.208535	0.34781
500.05	9.0062	-1.8893	-0.864576	-0.211913	0.208357	0.347264
500.69	9.00613	-1.89261	-0.864304	-0.212162	0.208171	0.346703
501.32	9.00567	-1.89586	-0.863997	-0.212404	0.207976	0.346126
501.96	9.00481	-1.89905	-0.863655	-0.212638	0.207773	0.345534
502.6	9.00356	-1.90218	-0.863276	-0.212864	0.20756	0.344925
503.24	9.0019	-1.90524	-0.862862	-0.213082	0.207337	0.344301
503.87	8.99985	-1.90824	-0.862411	-0.213292	0.207106	0.343661
504.49	8.99738	-1.91118	-0.861923	-0.213494	0.206865	0.343004
505.11	8.99451	-1.91405	-0.861398	-0.213688	0.206615	0.342331
505.73	8.99122	-1.91686	-0.860836	-0.213873	0.206356	0.341642
506.34	8.98752	-1.91961	-0.860237	-0.21405	0.206087	0.340936
506.96	8.9834	-1.92229	-0.859601	-0.214219	0.205808	0.340213
507.58	8.97886	-1.9249	-0.858927	-0.21438	0.205521	0.339474
508.2	8.97391	-1.92745	-0.858215	-0.214532	0.205223	0.338719
508.83	8.96854	-1.92993	-0.857465	-0.214676	0.204916	0.337947
509.46	8.96274	-1.93235	-0.856678	-0.214811	0.204599	0.337157
510.11	8.95652	-1.9347	-0.855852	-0.214938	0.204273	0.336351
510.76	8.94986	-1.93698	-0.854987	-0.215056	0.203937	0.335528
511.41	8.94278	-1.9392	-0.854083	-0.215165	0.203591	0.334688
512.07	8.93525	-1.94134	-0.853139	-0.215266	0.203235	0.33383
512.72	8.92729	-1.94342	-0.852157	-0.215358	0.202869	0.332955
513.36	8.91889	-1.94543	-0.851135	-0.215441	0.202493	0.332063
514	8.91005	-1.94737	-0.850072	-0.215515	0.202107	0.331153
514.62	8.90076	-1.94924	-0.84897	-0.21558	0.201711	0.330226
515.24	8.89102	-1.95103	-0.847828	-0.215636	0.201304	0.32928
515.85	8.88084	-1.95276	-0.846645	-0.215684	0.200888	0.328317
516.46	8.8702	-1.95442	-0.845421	-0.215722	0.200461	0.327337
517.07	8.85911	-1.956	-0.844157	-0.215751	0.200024	0.326338
517.68	8.84756	-1.95751	-0.842851	-0.21577	0.199576	0.325321
518.29	8.83555	-1.95895	-0.841504	-0.215781	0.199118	0.324286
518.91	8.82309	-1.96032	-0.840116	-0.215782	0.19865	0.323233
519.54	8.81015	-1.96161	-0.838686	-0.215774	0.198171	0.322162
520.16	8.79676	-1.96283	-0.837214	-0.215756	0.197682	0.321072
520.78	8.7829	-1.96397	-0.8357	-0.215729	0.197182	0.319964
521.41	8.76857	-1.96504	-0.834145	-0.215693	0.196671	0.318838
522.03	8.75378	-1.96603	-0.832547	-0.215647	0.19615	0.317694
522.65	8.73852	-1.96695	-0.830907	-0.215591	0.195618	0.316531
523.27	8.7228	-1.9678	-0.829226	-0.215527	0.195076	0.315349
523.89	8.70662	-1.96857	-0.827502	-0.215453	0.194523	0.314149
524.51	8.68996	-1.96927	-0.825736	-0.215369	0.193959	0.312931
525.13	8.67284	-1.9699	-0.823928	-0.215276	0.193385	0.311694
525.75	8.65524	-1.97044	-0.822077	-0.215173	0.1928	0.310439
526.37	8.63717	-1.97091	-0.820183	-0.215061	0.192204	0.309164
527	8.61862	-1.97131	-0.818247	-0.214939	0.191597	0.307871
527.62	8.5996	-1.97163	-0.816267	-0.214807	0.19098	0.30656
528.24	8.5801	-1.97187	-0.814244	-0.214665	0.190351	0.305229
528.87	8.56012	-1.97203	-0.812177	-0.214514	0.189712	0.303879
529.5	8.53965	-1.97211	-0.810067	-0.214353	0.189062	0.302511
530.13	8.5187	-1.97212	-0.807913	-0.214181	0.1884	0.301123
530.76	8.49727	-1.97205	-0.805716	-0.214	0.187728	0.299717
531.39	8.47535	-1.9719	-0.803474	-0.213809	0.187045	0.298291
532.02	8.45295	-1.97167	-0.801189	-0.213608	0.18635	0.296846
532.64	8.43006	-1.97136	-0.798859	-0.213397	0.185645	0.295382
533.25	8.40667	-1.97096	-0.796485	-0.213176	0.184928	0.293899
533.87	8.38279	-1.97049	-0.794066	-0.212945	0.1842	0.292396
534.48	8.35842	-1.96994	-0.791602	-0.212703	0.183461	0.290874
535.08	8.33356	-1.9693	-0.789094	-0.212451	0.182711	0.289333
535.69	8.3082	-1.96859	-0.786541	-0.212189	0.181949	0.287772
536.3	8.28234	-1.96779	-0.783944	-0.211917	0.181177	0.286192
536.9	8.256	-1.96691	-0.781301	-0.211635	0.180393	0.284592
537.51	8.22916	-1.96595	-0.778614	-0.211342	0.179598	0.282974
538.11	8.20182	-1.96491	-0.775882	-0.211039	0.178791	0.281335
538.72	8.174	-1.96379	-0.773105	-0.210726	0.177974	0.279678
539.33	8.14568	-1.96258	-0.770283	-0.210403	0.177145	0.278001
539.94	8.11687	-1.96129	-0.767417	-0.210069	0.176305	0.276304
540.55	8.08757	-1.95992	-0.764506	-0.209726	0.175453	0.274589
541.17	8.05777	-1.95847	-0.761549	-0.209371	0.174591	0.272853
541.78	8.02748	-1.95694	-0.758548	-0.209007	0.173717	0.271099
542.4	7.99669	-1.95532	-0.755501	-0.208632	0.172831	0.269324
543.01	7.96541	-1.95362	-0.75241	-0.208247	0.171935	0.267531
543.63	7.93364	-1.95184	-0.749274	-0.207852	0.171027	0.265717
544.24	7.90138	-1.94998	-0.746092	-0.207447	0.170108	0.263885
544.86	7.86863	-1.94804	-0.742866	-0.207031	0.169178	0.262032
545.47	7.83538	-1.94601	-0.739594	-0.206605	0.168236	0.260161
546.08	7.80165	-1.9439	-0.736278	-0.206169	0.167283	0.25827
546.7	7.76744	-1.94171	-0.732918	-0.205722	0.166319	0.25636
547.3	7.73273	-1.93944	-0.729512	-0.205266	0.165344	0.25443
547.91	7.69754	-1.93708	-0.726062	-0.204799	0.164357	0.252481
548.51	7.66186	-1.93464	-0.722567	-0.204322	0.16336	0.250513
549.11	7.62571	-1.93212	-0.719028	-0.203835	0.162351	0.248525
549.71	7.58907	-1.92952	-0.715444	-0.203337	0.161331	0.246519
550.31	7.55195	-1.92684	-0.711817	-0.20283	0.1603	0.244493
550.91	7.51436	-1.92408	-0.708145	-0.202312	0.159258	0.242448
551.51	7.4763	-1.92123	-0.704429	-0.201785	0.158205	0.240384
552.11	7.43776	-1.91831	-0.70067	-0.201248	0.157141	0.238301
552.71	7.39876	-1.91531	-0.696867	-0.2007	0.156066	0.2362
553.31	7.3593	-1.91223	-0.693021	-0.200143	0.154981	0.234079
553.91	7.31937	-1.90906	-0.689132	-0.199576	0.153884	0.23194
554.51	7.27898	-1.90582	-0.685199	-0.198999	0.152777	0.229782
555.11	7.23812	-1.9025	-0.681223	-0.198413	0.151659	0.227606
555.71	7.19681	-1.8991	-0.677205	-0.197816	0.15053	0.22541
556.31	7.15503	-1.89562	-0.673143	-0.19721	0.14939	0.223196
556.92	7.1128	-1.89206	-0.669038	-0.196594	0.148239	0.220964
557.53	7.07011	-1.88842	-0.66489	-0.195968	0.147078	0.218713
558.15	7.02696	-1.8847	-0.660699	-0.195332	0.145906	0.216443
558.77	6.98335	-1.8809	-0.656465	-0.194686	0.144723	0.214154
559.39	6.93928	-1.87702	-0.652188	-0.194031	0.143529	0.211847
560	6.89476	-1.87306	-0.647868	-0.193365	0.142325	0.209521
560.62	6.84978	-1.86902	-0.643505	-0.19269	0.141109	0.207177
561.23	6.80434	-1.8649	-0.639099	-0.192005	0.139883	0.204814
561.83	6.75845	-1.8607	-0.634649	-0.191311	0.138646	0.202432
562.44	6.7121	-1.85642	-0.630157	-0.190606	0.137399	0.200032
563.04	6.66529	-1.85206	-0.625621	-0.189891	0.13614	0.197613
563.64	6.61802	-1.84762	-0.621042	-0.189166	0.134871	0.195176
564.23	6.57029	-1.84309	-0.616419	-0.188432	0.133591	0.19272
564.82	6.52211	-1.83848	-0.611754	-0.187687	0.1323	0.190245
565.42	6.47347	-1.8338	-0.607045	-0.186932	0.130998	0.187751
566	6.42438	-1.82903	-0.602293	-0.186168	0.129686	0.18524
566.59	6.37483	-1.82418	-0.597498	-0.185393	0.128363	0.182709
567.18	6.32484	-1.81924	-0.59266	-0.184609	0.127029	0.18016
567.76	6.27439	-1.81423	-0.58778	-0.183815	0.125684	0.177593
568.34	6.2235	-1.80914	-0.582856	-0.183011	0.124329	0.175007
568.92	6.17215	-1.80396	-0.577889	-0.182197	0.122963	0.172403
569.5	6.12035	-1.7987	-0.572879	-0.181373	0.121586	0.16978
570.08	6.06809	-1.79336	-0.567826	-0.180539	0.120199	0.167139
570.66	6.01538	-1.78794	-0.562729	-0.179695	0.1188	0.164479
571.24	5.96222	-1.78243	-0.557589	-0.178841	0.117391	0.1618
571.82	5.90861	-1.77684	-0.552406	-0.177976	0.115971	0.159103
572.39	5.85454	-1.77117	-0.547179	-0.177102	0.11454	0.156388
572.97	5.80001	-1.76541	-0.541909	-0.176218	0.113098	0.153653
573.55	5.74504	-1.75957	-0.536595	-0.175323	0.111646	0.1509
574.12	5.68961	-1.75365	-0.531238	-0.174419	0.110183	0.148129
574.7	5.63374	-1.74764	-0.525838	-0.173504	0.108709	0.145339
575.27	5.57742	-1.74155	-0.520395	-0.17258	0.107224	0.142531
575.85	5.52065	-1.73538	-0.514909	-0.171645	0.105728	0.139704
576.43	5.46343	-1.72912	-0.509379	-0.170701	0.104222	0.136859
577.01	5.40577	-1.72278	-0.503807	-0.169746	0.102705	0.133996
577.59	5.34767	-1.71636	-0.498192	-0.168781	0.101178	0.131114
578.17	5.28913	-1.70985	-0.492534	-0.167807	0.0996398	0.128214
578.74	5.23015	-1.70326	-0.486833	-0.166822	0.0980912	0.125297
579.32	5.17074	-1.69659	-0.481091	-0.165828	0.0965321	0.122361
579.89	5.1109	-1.68983	-0.475306	-0.164823	0.0949626	0.119407
580.46	5.05063	-1.683	-0.46948	-0.163809	0.0933827	0.116436
581.02	4.98995	-1.67608	-0.463612	-0.162786	0.0917926	0.113447
581.59	4.92884	-1.66908	-0.457704	-0.161752	0.0901922	0.11044
582.16	4.86732	-1.662	-0.451754	-0.160709	0.0885817	0.107416
582.73	4.80538	-1.65484	-0.445763	-0.159657	0.0869611	0.104375
583.29	4.74303	-1.6476	-0.439732	-0.158595	0.0853302	0.101316
583.86	4.68027	-1.64027	-0.433659	-0.157523	0.0836893	0.0982398
584.43	4.6171	-1.63287	-0.427546	-0.156442	0.0820383	0.0951464
585	4.55352	-1.62539	-0.421392	-0.155351	0.0803773	0.0920358
585.58	4.48953	-1.61782	-0.415197	-0.15425	0.0787061	0.0889079
586.15	4.42513	-1.61017	-0.408962	-0.15314	0.0770248	0.0857629
586.72	4.36032	-1.60244	-0.402686	-0.15202	0.0753336	0.0826007
587.29	4.29511	-1.59463	-0.39637	-0.150891	0.0736324	0.0794214
587.86	4.22951	-1.58674	-0.390014	-0.149752	0.0719213	0.0762254
588.43	4.1635	-1.57877	-0.383618	-0.148604	0.0702003	0.0730124
588.99	4.0971	-1.57071	-0.377181	-0.147446	0.0684695	0.0697827
589.55	4.03031	-1.56258	-0.370706	-0.146279	0.0667289	0.0665363
590.1	3.96312	-1.55436	-0.36419	-0.145103	0.0649785	0.0632732
590.65	3.89554	-1.54607	-0.357635	-0.143916	0.0632185	0.0599935
591.2	3.82758	-1.53769	-0.351041	-0.142721	0.0614487	0.0566973
591.75	3.75923	-1.52923	-0.344407	-0.141516	0.0596692	0.0533847
592.29	3.69049	-1.52069	-0.337735	-0.140302	0.0578801	0.0500557
592.83	3.62137	-1.51207	-0.331023	-0.139078	0.0560815	0.0467103
593.38	3.55188	-1.50337	-0.324273	-0.137846	0.0542733	0.0433488
593.92	3.48201	-1.49459	-0.317484	-0.136604	0.0524557	0.0399712
594.46	3.41178	-1.48573	-0.310657	-0.135352	0.0506287	0.0365777
595	3.34117	-1.47679	-0.303792	-0.134092	0.0487924	0.0331683
595.54	3.2702	-1.46777	-0.296889	-0.132823	0.0469468	0.029743
596.09	3.19887	-1.45868	-0.289949	-0.131544	0.0450919	0.026302
596.63	3.12717	-1.4495	-0.28297	-0.130257	0.0432277	0.0228451
597.17	3.05512	-1.44025	-0.275954	-0.12896	0.0413543	0.0193726
597.72	2.9827	-1.43091	-0.268901	-0.127654	0.0394716	0.0158845
598.27	2.90993	-1.4215	-0.261809	-0.12634	0.0375798	0.0123807
598.82	2.8368	-1.41201	-0.254681	-0.125016	0.0356788	0.00886127
599.38	2.76331	-1.40243	-0.247515	-0.123683	0.0337686	0.0053263
599.95	2.68947	-1.39278	-0.240312	-0.122341	0.0318493	0.00177586
600.5	2.61529	-1.38305	-0.233072	-0.120991	0.029921	-0.00178993
601.06	2.54076	-1.37325	-0.225795	-0.119631	0.0279837	-0.00537095
601.6	2.46588	-1.36336	-0.218482	-0.118263	0.0260375	-0.00896712
602.15	2.39067	-1.3534	-0.211133	-0.116886	0.0240824	-0.0125784
602.69	2.31513	-1.34336	-0.203748	-0.1155	0.0221185	-0.0162046
603.22	2.23925	-1.33325	-0.196326	-0.114106	0.0201459	-0.0198456
603.76	2.16305	-1.32305	-0.18887	-0.112703	0.0181646	-0.0235014
604.29	2.08652	-1.31279	-0.181378	-0.111291	0.0161746	-0.0271718
604.83	2.00967	-1.30244	-0.173851	-0.109871	0.0141761	-0.0308568
605.36	1.9325	-1.29202	-0.166289	-0.108442	0.012169	-0.0345563
605.89	1.85502	-1.28153	-0.158693	-0.107005	0.0101535	-0.0382701
606.45	1.77723	-1.27096	-0.151062	-0.10556	0.00812967	-0.0419981
607.02	1.69914	-1.26032	-0.143398	-0.104107	0.00609752	-0.0457403
607.58	1.62075	-1.2496	-0.1357	-0.102645	0.00405716	-0.0494963
608.14	1.54206	-1.23881	-0.127968	-0.101175	0.00200867	-0.0532662
608.69	1.46308	-1.22795	-0.120204	-0.0996978	-4.79247e-05	-0.0570499
609.25	1.38381	-1.21702	-0.112406	-0.0982121	-0.00211255	-0.0608472
609.81	1.30425	-1.20601	-0.104576	-0.0967185	-0.00418517	-0.0646581
610.36	1.22441	-1.19494	-0.0967136	-0.095217	-0.00626573	-0.0684825
610.92	1.14429	-1.18379	-0.0888185	-0.0937076	-0.00835419	-0.0723204
611.47	1.06389	-1.17257	-0.0808911	-0.0921903	-0.0104505	-0.0761716
612.03	0.983206	-1.16128	-0.0729314	-0.0906652	-0.0125548	-0.0800362
612.58	0.90225	-1.14992	-0.0649396	-0.0891323	-0.0146668	-0.0839141
613.13	0.821022	-1.13849	-0.0569159	-0.0875916	-0.0167866	-0.0878053
613.69	0.739524	-1.12698	-0.0488605	-0.0860432	-0.0189142	-0.0917094
614.24	0.657761	-1.11541	-0.0407738	-0.0844872	-0.0210494	-0.0956266
614.79	0.575735	-1.10377	-0.0326557	-0.0829235	-0.0231921	-0.0995567
615.34	0.493447	-1.09205	-0.0245065	-0.0813521	-0.0253425	-0.1035
615.9	0.410901	-1.08027	-0.0163262	-0.0797732	-0.0275004	-0.107455
616.45	0.328097	-1.06841	-0.00811512	-0.0781867	-0.0296658	-0.111424
617	0.24504	-1.05649	0.00012669	-0.0765926	-0.0318387	-0.115405
617.56	0.161732	-1.04449	0.00839903	-0.0749911	-0.0340189	-0.119399
618.11	0.0781744	-1.03243	0.0167018	-0.073382	-0.0362066	-0.123405
618.67	-0.00563042	-1.0203	0.0250349	-0.0717655	-0.0384016	-0.127423
619.22	-0.0896792	-1.0081	0.0333981	-0.0701416	-0.0406039	-0.131454
619.78	-0.173969	-0.995826	0.0417912	-0.0685103	-0.0428135	-0.135497
620.33	-0.258495	-0.983487	0.0502139	-0.0668718	-0.0450302	-0.139553
620.89	-0.343255	-0.97108	0.058666	-0.065226	-0.047254	-0.14362
621.45	-0.428245	-0.958606	0.0671474	-0.063573	-0.049485	-0.1477
622.01	-0.513465	-0.946064	0.075658	-0.0619128	-0.051723	-0.151791
622.57	-0.598912	-0.933455	0.0841976	-0.0602455	-0.0539681	-0.155895
623.13	-0.684585	-0.920778	0.0927662	-0.058571	-0.0562202	-0.16001
623.68	-0.770482	-0.908034	0.101364	-0.0568894	-0.0584792	-0.164137
624.24	-0.8566	-0.895223	0.10999	-0.0552007	-0.0607452	-0.168276
624.79	-0.942939	-0.882344	0.118645	-0.0535049	-0.0630182	-0.172427
625.35	-1.0295	-0.869399	0.127328	-0.051802	-0.0652981	-0.176589
625.92	-1.11627	-0.856386	0.13604	-0.0500921	-0.0675849	-0.180763
626.48	-1.20326	-0.843307	0.144781	-0.0483752	-0.0698785	-0.184949
627.05	-1.29046	-0.830162	0.153549	-0.0466514	-0.0721789	-0.189146
627.61	-1.37786	-0.816951	0.162345	-0.0449207	-0.0744859	-0.193355
628.17	-1.46546	-0.803675	0.171169	-0.0431832	-0.0767997	-0.197575
628.72	-1.55326	-0.790334	0.18002	-0.041439	-0.07912	-0.201805
629.27	-1.64126	-0.776928	0.188897	-0.0396881	-0.0814468	-0.206047
629.81	-1.72944	-0.763457	0.197802	-0.0379305	-0.08378	-0.2103
630.35	-1.81781	-0.749923	0.206733	-0.0361663	-0.0861196	-0.214564
630.88	-1.90636	-0.736325	0.215689	-0.0343957	-0.0884654	-0.218838
631.42	-1.99509	-0.722665	0.224672	-0.0326187	-0.0908174	-0.223122
631.95	-2.08398	-0.708942	0.23368	-0.0308353	-0.0931755	-0.227417
632.49	-2.17304	-0.695157	0.242713	-0.0290456	-0.0955396	-0.231722
633.02	-2.26226	-0.681312	0.25177	-0.0272499	-0.0979096	-0.236037
633.55	-2.35163	-0.667407	0.260852	-0.0254481	-0.100285	-0.240362
634.09	-2.44115	-0.653443	0.269957	-0.0236405	-0.102667	-0.244696
634.62	-2.5308	-0.63942	0.279085	-0.021827	-0.105054	-0.24904
635.16	-2.62059	-0.625339	0.288236	-0.0200078	-0.107446	-0.253393
635.7	-2.71051	-0.611201	0.29741	-0.018183	-0.109844	-0.257755
636.24	-2.80055	-0.597005	0.306605	-0.0163526	-0.112247	-0.262126
636.79	-2.89071	-0.582753	0.315822	-0.0145168	-0.114655	-0.266506
637.34	-2.98099	-0.568446	0.325061	-0.0126755	-0.117069	-0.270894
637.89	-3.07137	-0.554082	0.334321	-0.0108288	-0.119487	-0.275291
638.43	-3.16186	-0.539664	0.343601	-0.00897687	-0.12191	-0.279696
638.97	-3.25245	-0.52519	0.352902	-0.00711972	-0.124338	-0.28411
639.5	-3.34313	-0.510663	0.362223	-0.00525745	-0.126771	-0.288531
640.03	-3.4339	-0.496082	0.371564	-0.0033902	-0.129209	-0.292961
640.56	-3.52475	-0.48145	0.380923	-0.00151811	-0.131651	-0.297397
641.08	-3.61567	-0.466765	0.390301	0.000358763	-0.134097	-0.301841
641.6	-3.70665	-0.45203	0.399697	0.00224031	-0.136548	-0.306293
642.11	-3.7977	-0.437244	0.40911	0.00412641	-0.139002	-0.310751
642.63	-3.8888	-0.422408	0.418541	0.00601698	-0.141461	-0.315215
643.15	-3.97994	-0.407523	0.427988	0.00791191	-0.143923	-0.319687
643.66	-4.07112	-0.392591	0.437451	0.00981107	-0.146389	-0.324164
644.18	-4.16234	-0.37761	0.446929	0.0117144	-0.148859	-0.328648
644.69	-4.25358	-0.362582	0.456424	0.0136218	-0.151333	-0.333138
645.21	-4.34485	-0.347508	0.465933	0.0155332	-0.15381	-0.337633
645.73	-4.43613	-0.332389	0.475456	0.0174484	-0.15629	-0.342134
646.25	-4.52741	-0.317225	0.484993	0.0193673	-0.158773	-0.34664
646.78	-4.6187	-0.302017	0.494543	0.0212898	-0.161259	-0.351152
647.31	-4.70998	-0.286766	0.504107	0.0232158	-0.163749	-0.355668
647.84	-4.80125	-0.271473	0.513682	0.0251452	-0.166241	-0.360189
648.38	-4.8925	-0.256138	0.52327	0.027078	-0.168736	-0.364714
648.92	-4.98373	-0.240762	0.53287	0.0290139	-0.171233	-0.369245
649.45	-5.07493	-0.225346	0.542481	0.030953	-0.173733	-0.373779
649.98	-5.16609	-0.209889	0.552103	0.0328951	-0.176236	-0.378317
650.5	-5.25722	-0.194394	0.561736	0.0348403	-0.178741	-0.38286
651.02	-5.34831	-0.178859	0.571379	0.0367883	-0.181248	-0.387406
651.54	-5.43935	-0.163285	0.581032	0.0387391	-0.183757	-0.391956
652.05	-5.53033	-0.147675	0.590694	0.0406927	-0.186269	-0.39651
652.57	-5.62125	-0.132028	0.600366	0.0426487	-0.188783	-0.401067
653.08	-5.7121	-0.116345	0.610046	0.0446072	-0.191298	-0.405627
653.6	-5.80287	-0.100628	0.619734	0.046568	-0.193815	-0.410189
654.11	-5.89355	-0.0848774	0.629429	0.048531	-0.196333	-0.414755
654.62	-5.98414	-0.0690938	0.63913	0.050496	-0.198853	-0.419322
655.14	-6.07462	-0.0532785	0.648838	0.0524629	-0.201374	-0.423892
655.66	-6.165	-0.0374325	0.658551	0.0544315	-0.203897	-0.428463
656.18	-6.25525	-0.0215567	0.668269	0.0564017	-0.20642	-0.433036
656.7	-6.34537	-0.00565193	0.677991	0.0583734	-0.208944	-0.43761
657.23	-6.43537	0.010281	0.687717	0.0603464	-0.211468	-0.442185
657.76	-6.52522	0.0262409	0.697446	0.0623207	-0.213993	-0.446761
658.3	-6.61492	0.0422267	0.707178	0.0642961	-0.216519	-0.451338
658.84	-6.70446	0.0582372	0.716912	0.0662724	-0.219045	-0.455916
659.38	-6.79383	0.0742714	0.726647	0.0682494	-0.22157	-0.460493
659.93	-6.88302	0.0903283	0.736384	0.0702271	-0.224096	-0.46507
660.47	-6.97203	0.106407	0.74612	0.0722053	-0.226622	-0.469647
661.01	-7.06085	0.122507	0.755856	0.0741838	-0.229147	-0.474223
661.55	-7.14948	0.138627	0.765591	0.0761626	-0.231671	-0.478798
662.09	-7.23789	0.154767	0.775326	0.0781416	-0.234195	-0.483372
662.63	-7.3261	0.170925	0.785058	0.0801207	-0.236719	-0.487946
663.17	-7.41409	0.187102	0.794789	0.0820998	-0.239242	-0.492518
663.7	-7.50187	0.203297	0.804517	0.0840788	-0.241763	-0.497088
664.23	-7.58941	0.219509	0.814243	0.0860576	-0.244284	-0.501657
664.75	-7.67673	0.235738	0.823966	0.0880361	-0.246804	-0.506224
665.27	-7.7638	0.251982	0.833684	0.0900143	-0.249323	-0.510789
665.79	-7.85063	0.268242	0.843399	0.0919919	-0.25184	-0.515351
666.31	-7.9372	0.284516	0.853109	0.093969	-0.254356	-0.519912
666.82	-8.02352	0.300803	0.862814	0.0959453	-0.25687	-0.524469
667.33	-8.10957	0.317104	0.872514	0.0979209	-0.259383	-0.529024
667.84	-8.19535	0.333418	0.882208	0.0998957	-0.261893	-0.533575
668.35	-8.28085	0.349744	0.891896	0.101869	-0.264402	-0.538124
668.85	-8.36607	0.366082	0.901577	0.103842	-0.266909	-0.542669
669.36	-8.45101	0.382431	0.911251	0.105814	-0.269414	-0.54721
669.87	-8.53565	0.398792	0.920918	0.107784	-0.271917	-0.551748
670.38	-8.62	0.415162	0.930577	0.109754	-0.274418	-0.556282
670.89	-8.70405	0.431542	0.940228	0.111722	-0.276916	-0.560813
671.4	-8.78778	0.447931	0.949872	0.113688	-0.279412	-0.565339
671.92	-8.87121	0.464329	0.959506	0.115653	-0.281906	-0.56986
672.44	-8.95431	0.480734	0.969131	0.117617	-0.284396	-0.574378
672.96	-9.0371	0.497148	0.978747	0.119578	-0.286885	-0.57889
673.49	-9.11956	0.513569	0.988353	0.121538	-0.28937	-0.583398
674.01	-9.20169	0.529998	0.99795	0.123497	-0.291853	-0.587902
674.53	-9.28349	0.546433	1.00754	0.125453	-0.294333	-0.5924
675.04	-9.36496	0.562876	1.01711	0.127408	-0.29681	-0.596894
675.54	-9.44609	0.579326	1.02668	0.129361	-0.299284	-0.601383
676.05	-9.52688	0.595784	1.03624	0.131313	-0.301756	-0.605867
676.55	-9.60733	0.612248	1.04578	0.133262	-0.304224	-0.610345
677.04	-9.68744	0.628718	1.05532	0.13521	-0.30669	-0.614819
677.54	-9.7672	0.645194	1.06484	0.137155	-0.309152	-0.619287
678.03	-9.8466	0.661676	1.07436	0.139099	-0.311611	-0.623749
678.52	-9.92563	0.678163	1.08386	0.14104	-0.314067	-0.628206
679.01	-10.0043	0.694654	1.09335	0.142979	-0.316519	-0.632657
679.5	-10.0826	0.71115	1.10282	0.144916	-0.318968	-0.637102
679.99	-10.1605	0.727649	1.11229	0.146851	-0.321414	-0.641541
680.49	-10.2381	0.744151	1.12174	0.148783	-0.323855	-0.645973
680.98	-10.3152	0.760656	1.13117	0.150712	-0.326293	-0.650399
681.47	-10.392	0.777162	1.1406	0.152639	-0.328727	-0.654818
681.97	-10.4683	0.793671	1.15	0.154563	-0.331157	-0.65923
682.47	-10.5443	0.81018	1.1594	0.156485	-0.333583	-0.663635
682.98	-10.6198	0.82669	1.16878	0.158403	-0.336005	-0.668033
683.48	-10.6949	0.843199	1.17814	0.160319	-0.338422	-0.672423
683.99	-10.7696	0.859706	1.18748	0.162231	-0.340835	-0.676806
684.51	-10.8439	0.876211	1.19681	0.16414	-0.343243	-0.68118
685.02	-10.9177	0.892714	1.20612	0.166046	-0.345646	-0.685546
685.52	-10.9911	0.909214	1.21542	0.167948	-0.348045	-0.689905
686.02	-11.064	0.925711	1.22469	0.169847	-0.350439	-0.694254
686.52	-11.1365	0.942205	1.23395	0.171742	-0.352828	-0.698595
687.01	-11.2085	0.958696	1.24319	0.173634	-0.355212	-0.702928
687.51	-11.28	0.975183	1.25241	0.175523	-0.357591	-0.707252
688	-11.3511	0.991667	1.26162	0.177408	-0.359965	-0.711567
688.49	-11.4218	1.00815	1.2708	0.179289	-0.362334	-0.715874
688.98	-11.4919	1.02463	1.27997	0.181167	-0.364698	-0.720171
689.47	-11.5616	1.0411	1.28911	0.183041	-0.367056	-0.724459
689.96	-11.6309	1.05757	1.29824	0.184912	-0.369409	-0.728738
690.45	-11.6996	1.07403	1.30735	0.186778	-0.371757	-0.733008
690.94	-11.7679	1.09049	1.31644	0.188641	-0.374099	-0.737267
691.43	-11.8356	1.10695	1.3255	0.1905	-0.376436	-0.741518
691.93	-11.9029	1.12339	1.33455	0.192355	-0.378767	-0.745758
692.42	-11.9697	1.13984	1.34357	0.194206	-0.381092	-0.749988
692.92	-12.0359	1.15627	1.35257	0.196052	-0.383411	-0.754208
693.43	-12.1017	1.17271	1.36156	0.197895	-0.385725	-0.758418
693.94	-12.1669	1.18913	1.37052	0.199734	-0.388033	-0.762617
694.45	-12.2317	1.20555	1.37945	0.201568	-0.390334	-0.766806
694.97	-12.2959	1.22196	1.38837	0.203399	-0.39263	-0.770985
695.49	-12.3596	1.23837	1.39726	0.205225	-0.394919	-0.775152
696	-12.4227	1.25476	1.40613	0.207046	-0.397202	-0.779308
696.52	-12.4854	1.27115	1.41498	0.208863	-0.399479	-0.783453
697.03	-12.5474	1.28753	1.4238	0.210675	-0.401749	-0.787587
697.55	-12.609	1.3039	1.4326	0.212483	-0.404013	-0.79171
698.06	-12.67	1.32026	1.44137	0.214286	-0.40627	-0.795821
698.57	-12.7304	1.33661	1.45012	0.216084	-0.40852	-0.79992
699.08	-12.7903	1.35295	1.45885	0.217878	-0.410764	-0.804007
699.59	-12.8496	1.36929	1.46754	0.219667	-0.413001	-0.808083
700.1	-12.9084	1.38561	1.47622	0.221451	-0.415231	-0.812147
700.6	-12.9666	1.40192	1.48487	0.223231	-0.417454	-0.816199
701.09	-13.0242	1.41823	1.49349	0.225005	-0.419671	-0.820239
701.58	-13.0813	1.43452	1.50209	0.226775	-0.42188	-0.824267
702.07	-13.1377	1.4508	1.51066	0.228539	-0.424083	-0.828282
702.56	-13.1936	1.46706	1.51921	0.230298	-0.426278	-0.832284
703.05	-13.2489	1.48332	1.52773	0.232053	-0.428466	-0.836274
703.53	-13.3036	1.49956	1.53622	0.233801	-0.430646	-0.84025
704.02	-13.3577	1.51579	1.54468	0.235545	-0.432819	-0.844214
704.5	-13.4112	1.53201	1.55312	0.237283	-0.434984	-0.848164
704.98	-13.4641	1.54821	1.56152	0.239015	-0.437142	-0.852101
705.47	-13.5164	1.5644	1.5699	0.240742	-0.439291	-0.856024
705.95	-13.568	1.58057	1.57825	0.242463	-0.441433	-0.859933
706.44	-13.619	1.59672	1.58657	0.244178	-0.443567	-0.863828
706.93	-13.6694	1.61286	1.59485	0.245888	-0.445693	-0.867709
707.42	-13.7191	1.62898	1.60311	0.247591	-0.44781	-0.871576
707.91	-13.7682	1.64508	1.61134	0.249288	-0.449919	-0.875427
708.41	-13.8166	1.66116	1.61953	0.250979	-0.45202	-0.879264
708.9	-13.8643	1.67722	1.62769	0.252663	-0.454112	-0.883086
709.41	-13.9114	1.69327	1.63582	0.254342	-0.456195	-0.886893
709.9	-13.9578	1.70929	1.64392	0.256013	-0.458269	-0.890684
710.39	-14.0035	1.72529	1.65198	0.257678	-0.460335	-0.89446
710.88	-14.0485	1.74127	1.66001	0.259337	-0.462392	-0.898221
711.36	-14.0929	1.75723	1.66801	0.260989	-0.46444	-0.901966
711.84	-14.1366	1.77317	1.67598	0.262635	-0.466479	-0.905696
712.32	-14.1796	1.78909	1.68391	0.264274	-0.468509	-0.909409
712.79	-14.2219	1.80499	1.6918	0.265906	-0.47053	-0.913108
713.26	-14.2635	1.82087	1.69967	0.267532	-0.472542	-0.91679
713.73	-14.3044	1.83673	1.7075	0.269151	-0.474545	-0.920456
714.2	-14.3446	1.85257	1.71529	0.270764	-0.476539	-0.924106
714.67	-14.3841	1.86838	1.72306	0.27237	-0.478523	-0.92774
715.13	-14.4229	1.88418	1.73078	0.273969	-0.480499	-0.931358
715.6	-14.461	1.89995	1.73848	0.275561	-0.482465	-0.93496
716.07	-14.4984	1.91571	1.74613	0.277147	-0.484422	-0.938545
716.54	-14.5351	1.93144	1.75376	0.278726	-0.486369	-0.942114
717.03	-14.571	1.94716	1.76135	0.280298	-0.488308	-0.945667
717.53	-14.6063	1.96285	1.7689	0.281864	-0.490236	-0.949203
718.04	-14.6408	1.97853	1.77642	0.283423	-0.492156	-0.952723
718.54	-14.6747	1.99418	1.78391	0.284975	-0.494066	-0.956226
719.04	-14.7077	2.00981	1.79135	0.28652	-0.495966	-0.959712
719.54	-14.7401	2.02543	1.79877	0.288058	-0.497857	-0.963181
720.03	-14.7717	2.04101	1.80614	0.289589	-0.499738	-0.966633
720.52	-14.8026	2.05658	1.81348	0.291114	-0.501609	-0.970067
721	-14.8328	2.07213	1.82079	0.292631	-0.50347	-0.973485
721.49	-14.8622	2.08766	1.82806	0.294141	-0.505322	-0.976886
721.97	-14.8909	2.10316	1.83529	0.295645	-0.507164	-0.980269
722.45	-14.9189	2.11865	1.84249	0.297141	-0.508997	-0.983636
722.93	-14.9461	2.13412	1.84965	0.298631	-0.510819	-0.986985
723.41	-14.9725	2.14956	1.85677	0.300113	-0.512632	-0.990317
723.89	-14.9983	2.16499	1.86386	0.301589	-0.514435	-0.993631
724.37	-15.0232	2.18039	1.87091	0.303058	-0.516228	-0.996929
724.85	-15.0475	2.19578	1.87792	0.30452	-0.518012	-1.00021
725.34	-15.0709	2.21114	1.8849	0.305975	-0.519785	-1.00347
725.83	-15.0937	2.22649	1.89184	0.307422	-0.521548	-1.00671
726.32	-15.1156	2.24181	1.89875	0.308863	-0.523301	-1.00994
726.82	-15.1368	2.25711	1.90561	0.310296	-0.525044	-1.01315
727.33	-15.1572	2.27239	1.91244	0.311722	-0.526777	-1.01634
727.84	-15.1769	2.28765	1.91923	0.313141	-0.528499	-1.01951
728.35	-15.1957	2.30289	1.92598	0.314552	-0.530211	-1.02267
728.85	-15.2138	2.3181	1.93269	0.315956	-0.531912	-1.0258
729.36	-15.2311	2.3333	1.93936	0.317353	-0.533603	-1.02892
729.87	-15.2476	2.34846	1.94599	0.318741	-0.535283	-1.03201
730.37	-15.2633	2.36361	1.95259	0.320123	-0.536952	-1.03509
730.86	-15.2781	2.37873	1.95914	0.321496	-0.53861	-1.03815
731.36	-15.2921	2.39382	1.96564	0.322861	-0.540257	-1.04119
731.85	-15.3053	2.40888	1.97211	0.324217	-0.541892	-1.04421
732.34	-15.3177	2.42391	1.97853	0.325566	-0.543516	-1.0472
732.83	-15.3292	2.43892	1.98492	0.326906	-0.545128	-1.05018
733.32	-15.3399	2.4539	1.99125	0.328238	-0.546729	-1.05314
733.81	-15.3497	2.46885	1.99755	0.329562	-0.548317	-1.05607
734.3	-15.3586	2.48377	2.00379	0.330876	-0.549894	-1.05899
734.8	-15.3667	2.49866	2.01	0.332183	-0.551459	-1.06188
735.29	-15.3739	2.51353	2.01616	0.33348	-0.553012	-1.06476
735.79	-15.3803	2.52836	2.02227	0.334769	-0.554553	-1.06761
736.29	-15.3857	2.54316	2.02834	0.33605	-0.556082	-1.07044
736.79	-15.3903	2.55793	2.03437	0.337321	-0.557598	-1.07325
737.3	-15.3939	2.57266	2.04034	0.338583	-0.559102	-1.07603
737.81	-15.3967	2.58737	2.04627	0.339836	-0.560593	-1.0788
738.33	-15.3985	2.60204	2.05216	0.34108	-0.562071	-1.08154
738.84	-15.3994	2.61667	2.05799	0.342314	-0.563536	-1.08426
739.36	-15.3994	2.63128	2.06377	0.343539	-0.564988	-1.08695
739.87	-15.3985	2.64584	2.06951	0.344754	-0.566427	-1.08962
740.39	-15.3966	2.66037	2.07519	0.345959	-0.567853	-1.09227
740.91	-15.3937	2.67486	2.08083	0.347155	-0.569265	-1.09489
741.43	-15.3899	2.68932	2.08641	0.348341	-0.570663	-1.09749
741.93	-15.3851	2.70373	2.09194	0.349516	-0.572048	-1.10007
742.43	-15.3794	2.71811	2.09742	0.350682	-0.573418	-1.10262
742.92	-15.3726	2.73245	2.10285	0.351837	-0.574775	-1.10515
743.41	-15.3649	2.74674	2.10822	0.352981	-0.576117	-1.10765
743.9	-15.3561	2.76099	2.11354	0.354115	-0.577444	-1.11012
744.38	-15.3464	2.7752	2.11881	0.355239	-0.578758	-1.11257
744.85	-15.3356	2.78937	2.12401	0.356351	-0.580056	-1.115
745.33	-15.3238	2.80349	2.12917	0.357452	-0.581339	-1.11739
745.81	-15.3109	2.81757	2.13427	0.358543	-0.582608	-1.11977
746.28	-15.297	2.8316	2.13931	0.359622	-0.583862	-1.12211
746.75	-15.2821	2.84558	2.14429	0.36069	-0.5851	-1.12443
747.22	-15.2661	2.85952	2.14922	0.361747	-0.586323	-1.12672
747.7	-15.2491	2.87342	2.15409	0.362792	-0.587531	-1.12898
748.17	-15.2309	2.88726	2.1589	0.363826	-0.588723	-1.13122
748.65	-15.2117	2.90105	2.16365	0.364847	-0.589899	-1.13343
749.13	-15.1914	2.9148	2.16834	0.365857	-0.591059	-1.13561
749.61	-15.17	2.92849	2.17297	0.366855	-0.592203	-1.13776
750.1	-15.1475	2.94213	2.17754	0.367841	-0.593331	-1.13988
750.59	-15.1239	2.95571	2.18204	0.368814	-0.594442	-1.14198
751.08	-15.0991	2.96924	2.18648	0.369774	-0.595536	-1.14404
751.57	-15.0732	2.98271	2.19086	0.370721	-0.596613	-1.14607
752.05	-15.0461	2.99612	2.19517	0.371656	-0.597672	-1.14808
752.52	-15.0178	3.00948	2.19942	0.372577	-0.598715	-1.15005
753	-14.9883	3.02277	2.2036	0.373484	-0.599739	-1.15199
753.47	-14.9577	3.036	2.20771	0.374378	-0.600746	-1.1539
753.93	-14.9258	3.04916	2.21175	0.375258	-0.601734	-1.15578
754.4	-14.8927	3.06226	2.21573	0.376124	-0.602704	-1.15763
754.86	-14.8584	3.0753	2.21963	0.376976	-0.603655	-1.15944
755.33	-14.8228	3.08826	2.22346	0.377813	-0.604588	-1.16122
755.79	-14.7859	3.10116	2.22722	0.378635	-0.605501	-1.16297
756.25	-14.7478	3.11398	2.2309	0.379443	-0.606395	-1.16468
756.72	-14.7084	3.12673	2.23452	0.380235	-0.60727	-1.16636
757.18	-14.6677	3.13941	2.23805	0.381012	-0.608125	-1.168
757.65	-14.6257	3.15202	2.24151	0.381774	-0.60896	-1.16961
758.12	-14.5824	3.16455	2.2449	0.382521	-0.609775	-1.17119
758.6	-14.5377	3.177	2.24821	0.383252	-0.61057	-1.17273
759.08	-14.4918	3.18939	2.25144	0.383967	-0.611345	-1.17423
759.56	-14.4445	3.20169	2.2546	0.384667	-0.6121	-1.1757
760.04	-14.3959	3.21392	2.25768	0.385351	-0.612834	-1.17714
760.53	-14.3459	3.22607	2.26068	0.386018	-0.613548	-1.17853
761.01	-14.2946	3.23814	2.2636	0.38667	-0.61424	-1.17989
761.49	-14.2419	3.25013	2.26644	0.387305	-0.614912	-1.18122
761.97	-14.1878	3.26204	2.2692	0.387924	-0.615562	-1.1825
762.45	-14.1324	3.27387	2.27189	0.388527	-0.616192	-1.18375
762.94	-14.0755	3.28562	2.27448	0.389113	-0.6168	-1.18497
763.42	-14.0173	3.29729	2.277	0.389682	-0.617386	-1.18614
763.89	-13.9576	3.30888	2.27944	0.390235	-0.617951	-1.18728
764.37	-13.8966	3.32038	2.28179	0.390771	-0.618495	-1.18838
764.84	-13.8341	3.3318	2.28406	0.39129	-0.619016	-1.18944
765.32	-13.7702	3.34314	2.28625	0.391792	-0.619515	-1.19046
765.79	-13.7049	3.35439	2.28835	0.392276	-0.619993	-1.19144
766.26	-13.6381	3.36555	2.29037	0.392743	-0.620448	-1.19238
766.74	-13.5699	3.37663	2.2923	0.393193	-0.62088	-1.19329
767.21	-13.5003	3.38762	2.29415	0.393626	-0.62129	-1.19415
767.69	-13.4291	3.39853	2.29591	0.394041	-0.621677	-1.19498
768.17	-13.3565	3.40935	2.29759	0.394438	-0.622042	-1.19577
768.65	-13.2825	3.42008	2.29918	0.394818	-0.622384	-1.19651
769.13	-13.2069	3.43073	2.30068	0.39518	-0.622703	-1.19722
769.62	-13.1299	3.44129	2.3021	0.395525	-0.622999	-1.19788
770.11	-13.0515	3.45176	2.30343	0.395852	-0.623273	-1.19851
770.61	-12.9715	3.46215	2.30467	0.396161	-0.623524	-1.19909
771.1	-12.8901	3.47245	2.30582	0.396453	-0.623751	-1.19964
771.58	-12.8071	3.48266	2.30689	0.396727	-0.623956	-1.20014
772.07	-12.7227	3.49278	2.30787	0.396982	-0.624137	-1.20061
772.55	-12.6367	3.50281	2.30876	0.39722	-0.624294	-1.20103
773.03	-12.5493	3.51276	2.30956	0.39744	-0.624428	-1.20141
773.51	-12.4603	3.52261	2.31027	0.397641	-0.624538	-1.20175
773.99	-12.3697	3.53237	2.31089	0.397823	-0.624624	-1.20205
774.47	-12.2776	3.54204	2.31141	0.397987	-0.624686	-1.2023
774.95	-12.184	3.55161	2.31185	0.398132	-0.624723	-1.20251
775.42	-12.0888	3.56109	2.31219	0.398258	-0.624736	-1.20268
775.9	-11.992	3.57047	2.31243	0.398365	-0.624725	-1.2028
776.36	-11.8936	3.57976	2.31259	0.398453	-0.624688	-1.20289
776.83	-11.7936	3.58895	2.31264	0.398521	-0.624626	-1.20292
777.29	-11.692	3.59803	2.3126	0.39857	-0.624539	-1.20291
777.75	-11.5888	3.60702	2.31246	0.398598	-0.624425	-1.20286
778.21	-11.4839	3.6159	2.31223	0.398606	-0.624286	-1.20276
778.67	-11.3773	3.62468	2.31189	0.398594	-0.624121	-1.20262
779.12	-11.2691	3.63335	2.31145	0.398561	-0.623929	-1.20243
779.58	-11.1592	3.64192	2.31091	0.398508	-0.623711	-1.20219
780.04	-11.0476	3.65038	2.31027	0.398434	-0.623466	-1.20191
780.49	-10.9343	3.65874	2.30953	0.398339	-0.623194	-1.20158
780.95	-10.8194	3.66698	2.30869	0.398223	-0.622896	-1.2012
781.41	-10.7027	3.67513	2.30774	0.398087	-0.622571	-1.20077
781.88	-10.5844	3.68316	2.3067	0.397929	-0.622219	-1.2003
782.34	-10.4643	3.69109	2.30555	0.397751	-0.621839	-1.19978
782.81	-10.3425	3.6989	2.30429	0.397551	-0.621433	-1.19921
783.29	-10.2189	3.70661	2.30293	0.39733	-0.620998	-1.1986
783.76	-10.0936	3.7142	2.30146	0.397087	-0.620536	-1.19793
784.23	-9.96658	3.72168	2.29989	0.396822	-0.620046	-1.19722
784.69	-9.83776	3.72905	2.29821	0.396535	-0.619527	-1.19645
785.15	-9.70716	3.73631	2.29642	0.396227	-0.618981	-1.19564
785.6	-9.57478	3.74345	2.29453	0.395896	-0.618405	-1.19478
786.06	-9.4406	3.75047	2.29252	0.395543	-0.617802	-1.19386
786.51	-9.30463	3.75738	2.29041	0.395167	-0.617169	-1.1929
786.96	-9.16685	3.76418	2.28818	0.39477	-0.616508	-1.19188
787.4	-9.02725	3.77086	2.28585	0.39435	-0.615817	-1.19082
787.85	-8.88582	3.77742	2.28341	0.393907	-0.615098	-1.1897
788.3	-8.74256	3.78386	2.28085	0.393441	-0.614349	-1.18853
788.74	-8.59744	3.79018	2.27818	0.392952	-0.613571	-1.18731
789.19	-8.45047	3.79638	2.2754	0.39244	-0.612762	-1.18604
789.64	-8.30164	3.80247	2.2725	0.391905	-0.611924	-1.18471
790.09	-8.15094	3.80843	2.26949	0.391346	-0.611057	-1.18334
790.54	-7.99838	3.81427	2.26637	0.390765	-0.610159	-1.18191
791	-7.84394	3.81999	2.26313	0.39016	-0.609231	-1.18042
791.46	-7.68762	3.82559	2.25978	0.389532	-0.608274	-1.17889
791.92	-7.52942	3.83107	2.25632	0.38888	-0.607286	-1.1773
792.39	-7.36934	3.83644	2.25274	0.388205	-0.606269	-1.17566
792.87	-7.20738	3.84168	2.24905	0.387507	-0.605221	-1.17397
793.34	-7.04352	3.8468	2.24524	0.386786	-0.604143	-1.17222
793.81	-6.87776	3.85181	2.24132	0.386041	-0.603035	-1.17042
794.28	-6.7101	3.85669	2.23728	0.385272	-0.601897	-1.16857
794.76	-6.54051	3.86145	2.23313	0.38448	-0.600727	-1.16666
795.22	-6.369	3.86609	2.22886	0.383663	-0.599528	-1.1647
795.69	-6.19556	3.87061	2.22447	0.382823	-0.598297	-1.16268
796.15	-6.02017	3.875	2.21996	0.381959	-0.597035	-1.16062
796.61	-5.84284	3.87927	2.21534	0.38107	-0.595743	-1.15849
797.07	-5.66355	3.88342	2.2106	0.380158	-0.594419	-1.15631
797.53	-5.48229	3.88745	2.20574	0.379221	-0.593064	-1.15408
797.98	-5.29907	3.89135	2.20076	0.378259	-0.591677	-1.15179
798.44	-5.11388	3.89512	2.19566	0.377273	-0.59026	-1.14944
798.89	-4.9267	3.89878	2.19045	0.376263	-0.58881	-1.14704
799.35	-4.73753	3.9023	2.18511	0.375228	-0.587329	-1.14459
799.81	-4.54635	3.9057	2.17965	0.374168	-0.585816	-1.14208
800.27	-4.35317	3.90898	2.17407	0.373083	-0.584272	-1.13951
800.73	-4.15798	3.91213	2.16837	0.371973	-0.582695	-1.13688
801.19	-3.96076	3.91515	2.16255	0.370838	-0.581086	-1.1342
801.66	-3.76153	3.91804	2.15661	0.369678	-0.579445	-1.13147
802.13	-3.56027	3.92082	2.15054	0.368493	-0.577772	-1.12867
802.6	-3.35698	3.92346	2.14435	0.367283	-0.576067	-1.12582
803.06	-3.15166	3.92598	2.13805	0.366048	-0.57433	-1.12292
803.53	-2.94432	3.92838	2.13162	0.364788	-0.572561	-1.11995
803.99	-2.73495	3.93065	2.12507	0.363503	-0.57076	-1.11693
804.45	-2.52354	3.93281	2.11839	0.362193	-0.568926	-1.11386
804.91	-2.3101	3.93483	2.1116	0.360858	-0.567061	-1.11072
805.36	-2.09461	3.93674	2.10469	0.359498	-0.565163	-1.10753
805.82	-1.87707	3.93852	2.09765	0.358113	-0.563234	-1.10429
806.27	-1.65749	3.94018	2.09049	0.356703	-0.561272	-1.10099
806.73	-1.43586	3.94172	2.08321	0.355268	-0.559277	-1.09762
807.18	-1.21217	3.94314	2.07581	0.353808	-0.557251	-1.09421
807.63	-0.986433	3.94444	2.06828	0.352322	-0.555192	-1.09073
808.09	-0.758636	3.94562	2.06064	0.350812	-0.553101	-1.0872
808.54	-0.528786	3.94668	2.05287	0.349277	-0.550978	-1.08361
808.99	-0.296883	3.94762	2.04498	0.347718	-0.548823	-1.07997
809.46	-0.0629257	3.94844	2.03698	0.346133	-0.546636	-1.07627
809.95	0.173088	3.94915	2.02885	0.344524	-0.544416	-1.07251
810.44	0.411159	3.94974	2.0206	0.342889	-0.542165	-1.0687
810.93	0.651289	3.95022	2.01223	0.341231	-0.539882	-1.06483
811.42	0.893475	3.95058	2.00374	0.339547	-0.537566	-1.0609
811.91	1.13772	3.95083	1.99513	0.337839	-0.535219	-1.05691
812.4	1.38401	3.95097	1.9864	0.336107	-0.532841	-1.05287
812.88	1.63235	3.951	1.97756	0.33435	-0.53043	-1.04878
813.37	1.88274	3.95092	1.96859	0.332569	-0.527989	-1.04463
813.85	2.13517	3.95073	1.95951	0.330764	-0.525515	-1.04042
814.34	2.38963	3.95043	1.95031	0.328935	-0.523011	-1.03615
814.82	2.64613	3.95004	1.941	0.327082	-0.520476	-1.03184
815.31	2.90465	3.94954	1.93157	0.325206	-0.517909	-1.02746
815.79	3.1652	3.94893	1.92202	0.323306	-0.515312	-1.02303
816.27	3.42778	3.94823	1.91236	0.321382	-0.512684	-1.01855
816.75	3.69239	3.94743	1.90258	0.319435	-0.510025	-1.01401
817.23	3.95904	3.94653	1.89269	0.317464	-0.507336	-1.00942
817.71	4.22771	3.94553	1.88269	0.31547	-0.504615	-1.00477
818.19	4.49841	3.94443	1.87257	0.313453	-0.501864	-1.00007
818.67	4.77116	3.94323	1.86233	0.311412	-0.499082	-0.995314
819.15	5.04594	3.94194	1.85199	0.309347	-0.496269	-0.990502
819.63	5.32276	3.94055	1.84152	0.30726	-0.493426	-0.985635
820.11	5.60163	3.93907	1.83095	0.305148	-0.490552	-0.980713
820.59	5.88254	3.93749	1.82025	0.303014	-0.487647	-0.975737
821.07	6.16549	3.93581	1.80945	0.300856	-0.484711	-0.970705
821.56	6.4505	3.93404	1.79853	0.298674	-0.481745	-0.965619
822.07	6.73757	3.93218	1.78749	0.29647	-0.478748	-0.960478
822.58	7.02671	3.93022	1.77634	0.294241	-0.475719	-0.955282
823.09	7.31792	3.92817	1.76508	0.291989	-0.47266	-0.95003
823.59	7.6112	3.92603	1.7537	0.289713	-0.46957	-0.944723
824.09	7.90656	3.92379	1.74221	0.287414	-0.466449	-0.939361
824.6	8.20399	3.92146	1.7306	0.285091	-0.463297	-0.933944
825.1	8.50351	3.91903	1.71888	0.282745	-0.460115	-0.928471
825.6	8.8051	3.91652	1.70704	0.280375	-0.456901	-0.922943
826.1	9.10877	3.91392	1.69509	0.277982	-0.453656	-0.91736
826.6	9.41451	3.91123	1.68302	0.275565	-0.450381	-0.911723
827.1	9.72233	3.90845	1.67085	0.273125	-0.447076	-0.90603
827.6	10.0322	3.90558	1.65856	0.270662	-0.443739	-0.900282
828.1	10.3442	3.90263	1.64615	0.268176	-0.440372	-0.89448
828.6	10.6583	3.89959	1.63363	0.265666	-0.436974	-0.888621
829.11	10.9745	3.89646	1.621	0.263132	-0.433545	-0.882708
829.61	11.2928	3.89325	1.60825	0.260575	-0.430084	-0.876739
830.12	11.6132	3.88995	1.59539	0.257994	-0.426593	-0.870714
830.62	11.9357	3.88656	1.58242	0.25539	-0.423071	-0.864633
831.13	12.2604	3.88308	1.56933	0.252762	-0.419518	-0.858497
831.63	12.5872	3.87952	1.55612	0.250111	-0.415933	-0.852305
832.13	12.9161	3.87588	1.5428	0.247436	-0.412318	-0.846057
832.63	13.2471	3.87215	1.52937	0.244738	-0.408672	-0.839754
833.12	13.5802	3.86834	1.51582	0.242016	-0.404994	-0.833395
833.61	13.9155	3.86445	1.50216	0.239271	-0.401286	-0.826981
834.09	14.2529	3.86048	1.48839	0.236502	-0.397547	-0.820511
834.58	14.5924	3.85643	1.4745	0.23371	-0.393777	-0.813985
835.06	14.934	3.8523	1.4605	0.230894	-0.389976	-0.807405
835.54	15.2778	3.84809	1.44639	0.228056	-0.386145	-0.800769
836.02	15.6237	3.8438	1.43216	0.225194	-0.382283	-0.794078
836.5	15.9717	3.83944	1.41783	0.222309	-0.378391	-0.787333
836.98	16.3218	3.83501	1.40338	0.219402	-0.374468	-0.780532
837.46	16.6741	3.83051	1.38883	0.216472	-0.370516	-0.773678
837.94	17.0284	3.82594	1.37416	0.213519	-0.366533	-0.76677
838.42	17.3849	3.8213	1.35939	0.210544	-0.362522	-0.759808
838.9	17.7434	3.8166	1.34451	0.207547	-0.35848	-0.752793
839.39	18.104	3.81183	1.32953	0.204528	-0.354409	-0.745725
839.87	18.4668	3.807	1.31444	0.201487	-0.350309	-0.738604
840.36	18.8316	3.80211	1.29924	0.198424	-0.34618	-0.73143
840.85	19.1985	3.79717	1.28394	0.195339	-0.342021	-0.724203
841.34	19.5675	3.79216	1.26853	0.192232	-0.337834	-0.716923
841.84	19.9386	3.78709	1.25301	0.189103	-0.333617	-0.709591
842.34	20.3118	3.78196	1.23739	0.185952	-0.32937	-0.702205
842.84	20.6871	3.77678	1.22167	0.18278	-0.325095	-0.694766
843.34	21.0645	3.77154	1.20584	0.179585	-0.320791	-0.687275
843.83	21.4441	3.76625	1.18991	0.176369	-0.316458	-0.679731
844.32	21.8257	3.7609	1.17387	0.173132	-0.312096	-0.672135
844.81	22.2094	3.75551	1.15773	0.169873	-0.307705	-0.664487
845.3	22.5952	3.75006	1.14148	0.166592	-0.303286	-0.656787
845.78	22.9831	3.74456	1.12514	0.163291	-0.298839	-0.649036
846.26	23.3731	3.73902	1.10869	0.159967	-0.294363	-0.641232
846.74	23.7652	3.73343	1.09214	0.156623	-0.289858	-0.633377
847.21	24.1594	3.7278	1.07549	0.153258	-0.285326	-0.62547
847.68	24.5557	3.72212	1.05874	0.149871	-0.280765	-0.617512
848.14	24.9541	3.71639	1.04189	0.146464	-0.276176	-0.609503
848.61	25.3546	3.71063	1.02494	0.143035	-0.27156	-0.601442
849.07	25.7571	3.70483	1.00789	0.139586	-0.266915	-0.593331
849.55	26.1618	3.69899	0.990743	0.136116	-0.262243	-0.58517
850.04	26.5685	3.69312	0.973498	0.132626	-0.257544	-0.576958
850.53	26.9773	3.68721	0.956157	0.129116	-0.252817	-0.568696
850.94	27.3882	3.68127	0.938719	0.125586	-0.248063	-0.560385
851.29	27.8011	3.6753	0.921185	0.122035	-0.243282	-0.552024
851.64	28.2161	3.6693	0.903556	0.118465	-0.238474	-0.543613
852	28.6332	3.66327	0.885831	0.114874	-0.233639	-0.535152
852.35	29.0524	3.65721	0.868011	0.111263	-0.228778	-0.526642
852.71	29.4736	3.65113	0.850097	0.107633	-0.223889	-0.518083
853.07	29.8969	3.64502	0.832087	0.103983	-0.218973	-0.509474
853.43	30.3223	3.63888	0.813984	0.100312	-0.21403	-0.500816
853.79	30.7498	3.63273	0.795787	0.0966227	-0.209061	-0.492108
854.17	31.1793	3.62655	0.777497	0.0929135	-0.204066	-0.483352
854.54	31.6109	3.62035	0.759115	0.0891851	-0.199044	-0.474547
854.96	32.0446	3.61414	0.740642	0.0854374	-0.193996	-0.465694
855.39	32.4803	3.60791	0.722079	0.0816708	-0.188922	-0.456793
855.82	32.9181	3.60167	0.703425	0.0778853	-0.183822	-0.447844
856.27	33.3579	3.59542	0.684683	0.0740811	-0.178697	-0.438848
856.69	33.7997	3.58916	0.665852	0.0702584	-0.173546	-0.429805
857.1	34.2436	3.58289	0.646934	0.0664173	-0.16837	-0.420714
857.52	34.6895	3.57662	0.627928	0.0625579	-0.163169	-0.411577
857.92	35.1374	3.57034	0.608837	0.0586805	-0.157943	-0.402393
858.33	35.5874	3.56406	0.589661	0.0547853	-0.152692	-0.393163
858.74	36.0393	3.55778	0.570401	0.0508724	-0.147417	-0.383888
859.14	36.4933	3.55151	0.551057	0.0469422	-0.142117	-0.374567
859.55	36.9492	3.54525	0.531632	0.0429948	-0.136794	-0.365201
859.95	37.4072	3.53899	0.512126	0.0390305	-0.131447	-0.355791
860.36	37.8671	3.53274	0.492539	0.0350494	-0.126076	-0.346336
860.77	38.329	3.52651	0.472872	0.0310516	-0.120681	-0.336837
861.19	38.7929	3.52029	0.453127	0.0270372	-0.115263	-0.327293
861.61	39.2587	3.51409	0.433303	0.0230064	-0.109822	-0.317707
862.04	39.7266	3.5079	0.413401	0.0189593	-0.104358	-0.308076
862.47	40.1963	3.50174	0.393421	0.014896	-0.0988704	-0.298402
862.92	40.6681	3.49559	0.373364	0.0108164	-0.09336	-0.288684
863.37	41.1418	3.48946	0.353229	0.00672076	-0.0878267	-0.278923
863.83	41.6175	3.48336	0.333019	0.00260917	-0.0822706	-0.269119
864.29	42.0952	3.47728	0.312733	-0.00151819	-0.0766919	-0.259273
864.73	42.5748	3.47123	0.292372	-0.00566116	-0.0710909	-0.249383
865.18	43.0564	3.46521	0.271938	-0.00981968	-0.0654675	-0.239452
865.63	43.5399	3.45921	0.251429	-0.0139937	-0.0598219	-0.229477
866.07	44.0254	3.45325	0.230847	-0.018183	-0.0541541	-0.219461
866.51	44.5129	3.44732	0.210192	-0.0223877	-0.0484643	-0.209403
866.96	45.0022	3.44143	0.189465	-0.0266075	-0.0427526	-0.199303
867.39	45.4936	3.43557	0.168667	-0.0308423	-0.0370191	-0.189162
867.82	45.9869	3.42975	0.147797	-0.0350921	-0.0312639	-0.178978
868.23	46.4821	3.42397	0.126856	-0.0393568	-0.0254871	-0.168754
868.67	46.9793	3.41823	0.105845	-0.0436362	-0.0196888	-0.158488
869.12	47.4784	3.41253	0.0847641	-0.0479301	-0.0138693	-0.148182
869.51	47.9795	3.40688	0.063615	-0.0522384	-0.00802856	-0.137835
869.88	48.4824	3.40127	0.0423981	-0.0565609	-0.00216694	-0.127447
870.26	48.9873	3.39571	0.0211139	-0.0608974	0.00371552	-0.117019
870.64	49.4942	3.39021	-0.000237301	-0.0652479	0.00961874	-0.106552
871.04	50.0029	3.38475	-0.0216551	-0.0696123	0.0155426	-0.0960441
871.46	50.5136	3.37935	-0.0431391	-0.0739905	0.0214872	-0.0854965
871.9	51.0262	3.374	-0.064689	-0.0783826	0.0274523	-0.0749091
872.34	51.5407	3.36871	-0.0863042	-0.0827882	0.0334378	-0.064282
872.76	52.0572	3.36347	-0.107985	-0.0872075	0.0394437	-0.0536153
873.19	52.5756	3.35829	-0.12973	-0.0916403	0.04547	-0.0429091
873.6	53.0959	3.35317	-0.15154	-0.0960865	0.0515166	-0.0321634
873.99	53.6181	3.34811	-0.173413	-0.100546	0.0575832	-0.0213786
874.36	54.1422	3.34311	-0.195349	-0.105018	0.0636698	-0.010555
874.72	54.6682	3.33818	-0.217347	-0.109504	0.069776	0.000307166
875.08	55.1962	3.33332	-0.239406	-0.114002	0.0759018	0.0112076
875.44	55.726	3.32853	-0.261526	-0.118513	0.0820469	0.022146
875.8	56.2577	3.32381	-0.283704	-0.123036	0.0882111	0.0331222
876.18	56.7913	3.31916	-0.305942	-0.127571	0.0943943	0.0441356
876.54	57.3268	3.3146	-0.328236	-0.132118	0.100596	0.055186
876.89	57.8642	3.31011	-0.350587	-0.136677	0.106816	0.0662729
877.23	58.4034	3.3057	-0.372993	-0.141247	0.113055	0.0773961
877.58	58.9445	3.30138	-0.395454	-0.145829	0.119311	0.0885552
877.93	59.4874	3.29715	-0.417968	-0.150422	0.125586	0.0997496
878.3	60.0321	3.29301	-0.440533	-0.155025	0.131877	0.110979
878.68	60.5787	3.28896	-0.463148	-0.159639	0.138186	0.122242
879.09	61.1271	3.28501	-0.485811	-0.164262	0.144511	0.133539
879.53	61.6773	3.28116	-0.508522	-0.168896	0.150852	0.144869
879.96	62.2292	3.27742	-0.531279	-0.173539	0.15721	0.156232
880.38	62.783	3.27379	-0.55408	-0.178191	0.163583	0.167628
880.77	63.3385	3.27026	-0.576925	-0.182853	0.169972	0.179055
881.13	63.8958	3.26685	-0.599813	-0.187523	0.176376	0.190514
881.48	64.4548	3.26355	-0.622743	-0.192202	0.182795	0.202004
881.82	65.0156	3.26037	-0.645713	-0.196889	0.189229	0.213525
882.15	65.5781	3.2573	-0.668723	-0.201584	0.195678	0.225076
882.48	66.1424	3.25436	-0.691772	-0.206288	0.202141	0.236658
882.82	66.7084	3.25155	-0.714858	-0.210999	0.208618	0.248269
883.16	67.2761	3.24887	-0.737979	-0.215717	0.215109	0.259908
883.5	67.8455	3.24632	-0.761133	-0.220443	0.221613	0.271576
883.84	68.4166	3.2439	-0.784321	-0.225175	0.228129	0.283272
884.16	68.9893	3.24163	-0.807539	-0.229913	0.234659	0.294995
884.48	69.5638	3.2395	-0.830786	-0.234658	0.2412	0.306745
884.8	70.1398	3.23751	-0.854062	-0.239408	0.247754	0.318521
885.13	70.7176	3.23568	-0.877364	-0.244164	0.254319	0.330322
885.46	71.2969	3.234	-0.900691	-0.248925	0.260895	0.342148
885.81	71.8779	3.23248	-0.924041	-0.253692	0.267483	0.353999
886.17	72.4605	3.23111	-0.947415	-0.258462	0.274081	0.365874
886.57	73.0447	3.22991	-0.970809	-0.263238	0.280689	0.377772
886.99	73.6304	3.22888	-0.994222	-0.268017	0.287307	0.389693
887.39	74.2178	3.22801	-1.01765	-0.2728	0.293934	0.401637
887.77	74.8067	3.22732	-1.0411	-0.277586	0.300571	0.413602
888.12	75.3971	3.22681	-1.06456	-0.282375	0.307217	0.425589
888.45	75.9891	3.22648	-1.08804	-0.287167	0.313871	0.437596
888.77	76.5826	3.22633	-1.11153	-0.291961	0.320533	0.449623
889.09	77.1776	3.22637	-1.13503	-0.296758	0.327204	0.46167
889.4	77.7742	3.22659	-1.15853	-0.301557	0.333882	0.473737
889.7	78.3722	3.22701	-1.18205	-0.306357	0.340567	0.485822
890.01	78.9718	3.22763	-1.20558	-0.311159	0.34726	0.497927
890.33	79.5728	3.22844	-1.22911	-0.315962	0.35396	0.510049
890.65	80.1753	3.22945	-1.25265	-0.320767	0.360666	0.52219
890.96	80.7792	3.23066	-1.27619	-0.325571	0.367379	0.534347
891.27	81.3847	3.23209	-1.29973	-0.330377	0.374098	0.546521
891.56	81.9915	3.23372	-1.32328	-0.335182	0.380822	0.558711
891.86	82.5998	3.23557	-1.34682	-0.339986	0.387551	0.570917
892.15	83.2094	3.23765	-1.37036	-0.34479	0.394285	0.583136
892.43	83.8205	3.23994	-1.39389	-0.349592	0.401024	0.59537
892.72	84.4329	3.24247	-1.41742	-0.354393	0.407766	0.607617
893.01	85.0467	3.24522	-1.44093	-0.359192	0.414511	0.619876
893.32	85.6618	3.24822	-1.46444	-0.363988	0.421259	0.632146
893.63	86.2782	3.25145	-1.48793	-0.368782	0.42801	0.644428
893.97	86.896	3.25493	-1.51142	-0.373573	0.434763	0.656721
894.31	87.515	3.25866	-1.53488	-0.37836	0.441518	0.669023
894.64	88.1353	3.26264	-1.55833	-0.383143	0.448274	0.681334
894.97	88.7569	3.26687	-1.58175	-0.387922	0.455031	0.693654
895.31	89.3797	3.27137	-1.60516	-0.392695	0.461788	0.705981
895.65	90.0038	3.27614	-1.62854	-0.397464	0.468546	0.718315
896	90.6291	3.28117	-1.6519	-0.402227	0.475302	0.730655
896.34	91.2555	3.28648	-1.67523	-0.406985	0.482058	0.743001
896.66	91.8832	3.29206	-1.69853	-0.411736	0.488813	0.755352
896.97	92.512	3.29792	-1.7218	-0.41648	0.495566	0.767707
897.26	93.142	3.30407	-1.74504	-0.421218	0.502317	0.780067
897.55	93.7731	3.31051	-1.76825	-0.425949	0.509067	0.79243
897.83	94.4054	3.31723	-1.79142	-0.430673	0.515814	0.804797
898.11	95.0389	3.32424	-1.81456	-0.435389	0.522558	0.817166
898.39	95.6735	3.33155	-1.83767	-0.440097	0.529299	0.829538
898.67	96.3092	3.33916	-1.86073	-0.444797	0.536037	0.841911
898.96	96.946	3.34708	-1.88376	-0.449488	0.542772	0.854285
899.26	97.5838	3.3553	-1.90675	-0.454171	0.549502	0.86666
899.56	98.2228	3.36382	-1.92969	-0.458845	0.556228	0.879035
899.85	98.8629	3.37267	-1.95259	-0.463509	0.56295	0.891409
900.13	99.504	3.38182	-1.97545	-0.468164	0.569666	0.903783
900.41	100.146	3.3913	-1.99826	-0.472809	0.576377	0.916156
900.68	100.789	3.4011	-2.02102	-0.477444	0.583083	0.928526
900.95	101.434	3.41122	-2.04374	-0.482069	0.589783	0.940895
901.23	102.079	3.42166	-2.0664	-0.486683	0.596478	0.953261
901.5	102.725	3.43244	-2.08902	-0.491287	0.603166	0.965625
901.78	103.373	3.44355	-2.11158	-0.495879	0.609847	0.977985
902.07	104.021	3.455	-2.13409	-0.500461	0.616522	0.990341
902.37	104.67	3.46679	-2.15655	-0.50503	0.62319	1.00269
902.69	105.321	3.47891	-2.17896	-0.509588	0.629851	1.01504
903.02	105.972	3.49139	-2.2013	-0.514134	0.636504	1.02738
903.34	106.625	3.5042	-2.22359	-0.518668	0.643149	1.03972
903.66	107.278	3.51737	-2.24583	-0.52319	0.649787	1.05205
903.98	107.932	3.53089	-2.268	-0.5277	0.656417	1.06438
904.31	108.588	3.54475	-2.29012	-0.532197	0.663039	1.0767
904.64	109.244	3.55897	-2.31218	-0.536681	0.669653	1.08902
904.98	109.901	3.57355	-2.33418	-0.541153	0.676259	1.10133
905.3	110.559	3.58848	-2.35612	-0.545613	0.682857	1.11363
905.6	111.219	3.60377	-2.378	-0.550059	0.689446	1.12593
905.89	111.879	3.61942	-2.39982	-0.554492	0.696027	1.13822
906.17	112.54	3.63544	-2.42157	-0.558912	0.702598	1.15051
906.44	113.202	3.65183	-2.44326	-0.563318	0.70916	1.16278
906.71	113.865	3.66858	-2.46489	-0.567711	0.715713	1.17505
906.98	114.529	3.68572	-2.48645	-0.572089	0.722256	1.18731
907.25	115.194	3.70322	-2.50794	-0.576453	0.728789	1.19956
907.52	115.86	3.72111	-2.52936	-0.580802	0.735311	1.2118
907.8	116.527	3.73938	-2.55071	-0.585136	0.741823	1.22404
908.09	117.195	3.75804	-2.57199	-0.589455	0.748324	1.23626
908.38	117.863	3.77708	-2.5932	-0.593759	0.754814	1.24847
908.66	118.533	3.79652	-2.61433	-0.598048	0.761293	1.26067
908.93	119.203	3.81635	-2.63539	-0.60232	0.767759	1.27286
909.19	119.875	3.83659	-2.65637	-0.606576	0.774214	1.28503
909.46	120.547	3.85723	-2.67727	-0.610815	0.780655	1.2972
909.72	121.22	3.87827	-2.69809	-0.615038	0.787084	1.30935
909.98	121.893	3.89973	-2.71883	-0.619243	0.793499	1.32148
910.24	122.568	3.92159	-2.73949	-0.623431	0.799902	1.33361
910.51	123.243	3.94387	-2.76007	-0.627601	0.80629	1.34571
910.78	123.92	3.96657	-2.78056	-0.631754	0.812665	1.35781
911.07	124.597	3.98969	-2.80096	-0.635889	0.819026	1.36989
911.36	125.275	4.01323	-2.82128	-0.640006	0.825373	1.38195
911.68	125.953	4.03719	-2.84152	-0.644105	0.831706	1.394
911.99	126.633	4.06157	-2.86167	-0.648187	0.838025	1.40603
912.3	127.313	4.08638	-2.88173	-0.65225	0.84433	1.41805
912.61	127.994	4.11162	-2.90171	-0.656294	0.85062	1.43005
912.92	128.676	4.1373	-2.92159	-0.66032	0.856895	1.44204
913.24	129.359	4.1634	-2.94139	-0.664327	0.863154	1.454
913.56	130.043	4.18995	-2.96109	-0.668315	0.869399	1.46596
913.88	130.727	4.21693	-2.9807	-0.672284	0.875628	1.47789
914.18	131.412	4.24436	-3.00022	-0.676233	0.881841	1.48981
914.47	132.098	4.27223	-3.01965	-0.680163	0.888039	1.5017
914.75	132.785	4.30055	-3.03898	-0.684073	0.89422	1.51358
915.01	133.473	4.32931	-3.05821	-0.687964	0.900386	1.52545
915.28	134.161	4.35853	-3.07735	-0.691834	0.906534	1.53729
915.54	134.85	4.3882	-3.09639	-0.695685	0.912667	1.54911
915.8	135.54	4.41833	-3.11534	-0.699515	0.918782	1.56092
916.05	136.231	4.44892	-3.13418	-0.703324	0.92488	1.5727
916.32	136.922	4.47997	-3.15292	-0.707112	0.930961	1.58447
916.58	137.614	4.51149	-3.17156	-0.710879	0.937024	1.59621
916.86	138.307	4.54348	-3.1901	-0.714625	0.943069	1.60793
917.14	139	4.57594	-3.20854	-0.718349	0.949096	1.61963
917.41	139.695	4.60887	-3.22687	-0.722051	0.955105	1.63131
917.67	140.39	4.64228	-3.24509	-0.725732	0.961095	1.64297
917.93	141.086	4.67616	-3.26321	-0.729391	0.967067	1.65461
918.18	141.782	4.71052	-3.28123	-0.733028	0.973021	1.66622
918.43	142.479	4.74537	-3.29913	-0.736643	0.978955	1.67782
918.68	143.177	4.78069	-3.31693	-0.740236	0.984871	1.68938
918.93	143.876	4.81651	-3.33462	-0.743806	0.990768	1.70093
919.19	144.575	4.85281	-3.3522	-0.747353	0.996645	1.71245
919.45	145.275	4.8896	-3.36967	-0.750877	1.0025	1.72395
919.72	145.976	4.92689	-3.38703	-0.754378	1.00834	1.73543
919.99	146.678	4.96468	-3.40427	-0.757855	1.01416	1.74688
920.28	147.38	5.00297	-3.4214	-0.761309	1.01996	1.75831
920.58	148.083	5.04177	-3.43841	-0.764738	1.02573	1.76971
920.89	148.786	5.08107	-3.45531	-0.768144	1.03149	1.78108
921.19	149.49	5.12088	-3.47208	-0.771524	1.03722	1.79243
921.49	150.195	5.16121	-3.48874	-0.77488	1.04293	1.80375
921.79	150.9	5.20206	-3.50528	-0.778211	1.04862	1.81505
922.09	151.607	5.24342	-3.52169	-0.781517	1.05429	1.82631
922.41	152.313	5.28531	-3.53798	-0.784797	1.05994	1.83755
922.71	153.02	5.32773	-3.55415	-0.78805	1.06556	1.84876
923	153.728	5.37069	-3.57018	-0.791277	1.07116	1.85994
923.27	154.437	5.41418	-3.58609	-0.794478	1.07673	1.87109
923.54	155.146	5.45821	-3.60187	-0.797652	1.08228	1.88221
923.8	155.855	5.50278	-3.61751	-0.800798	1.08781	1.8933
924.05	156.566	5.54789	-3.63303	-0.803917	1.09332	1.90435
924.3	157.276	5.59355	-3.64841	-0.807009	1.09879	1.91538
924.55	157.988	5.63976	-3.66366	-0.810073	1.10425	1.92638
924.8	158.699	5.68652	-3.67878	-0.81311	1.10968	1.93734
925.05	159.412	5.73384	-3.69376	-0.816119	1.11508	1.94827
925.31	160.125	5.7817	-3.70861	-0.8191	1.12046	1.95917
925.57	160.838	5.83012	-3.72333	-0.822053	1.12582	1.97004
925.83	161.553	5.8791	-3.73791	-0.824978	1.13115	1.98088
926.1	162.267	5.92864	-3.75235	-0.827875	1.13645	1.99168
926.35	162.982	5.97874	-3.76665	-0.830743	1.14173	2.00245
926.6	163.698	6.0294	-3.78082	-0.833584	1.14698	2.01319
926.85	164.415	6.08063	-3.79485	-0.836395	1.15221	2.0239
927.09	165.132	6.13242	-3.80875	-0.839179	1.15742	2.03457
927.33	165.849	6.18478	-3.8225	-0.841934	1.16259	2.04521
927.57	166.567	6.23771	-3.83612	-0.84466	1.16774	2.05582
927.82	167.286	6.29121	-3.8496	-0.847358	1.17287	2.0664
928.06	168.005	6.34528	-3.86293	-0.850027	1.17797	2.07694
928.31	168.725	6.39993	-3.87613	-0.852667	1.18304	2.08745
928.57	169.446	6.45516	-3.88919	-0.855278	1.18809	2.09793
928.84	170.167	6.51096	-3.9021	-0.85786	1.19311	2.10837
929.11	170.888	6.56735	-3.91488	-0.860412	1.19811	2.11878
929.4	171.61	6.62432	-3.9275	-0.862935	1.20308	2.12915
929.7	172.333	6.68188	-3.93999	-0.865428	1.20802	2.13949
929.99	173.056	6.74003	-3.95233	-0.867892	1.21293	2.14979
930.28	173.78	6.79876	-3.96453	-0.870326	1.21782	2.16006
930.57	174.504	6.85809	-3.97658	-0.87273	1.22268	2.1703
930.86	175.229	6.918	-3.98849	-0.875104	1.22752	2.1805
931.16	175.955	6.97851	-4.00025	-0.877449	1.23233	2.19067
931.46	176.681	7.03961	-4.01187	-0.879764	1.23711	2.20081
931.74	177.408	7.1013	-4.02335	-0.88205	1.24186	2.2109
932	178.135	7.16359	-4.03468	-0.884305	1.24659	2.22097
932.26	178.863	7.22648	-4.04586	-0.88653	1.25129	2.231
932.51	179.592	7.28997	-4.05689	-0.888725	1.25596	2.241
932.76	180.321	7.35407	-4.06778	-0.89089	1.26061	2.25096
933	181.051	7.41877	-4.07852	-0.893024	1.26523	2.26088
933.24	181.781	7.48408	-4.08911	-0.895127	1.26982	2.27077
933.48	182.512	7.55	-4.09955	-0.897199	1.27438	2.28062
933.72	183.243	7.61654	-4.10983	-0.89924	1.27891	2.29044
933.96	183.975	7.68369	-4.11997	-0.90125	1.28342	2.30022
934.21	184.708	7.75147	-4.12995	-0.903228	1.28789	2.30996
934.46	185.441	7.81987	-4.13977	-0.905175	1.29234	2.31966
934.72	186.175	7.8889	-4.14944	-0.907089	1.29676	2.32933
934.97	186.909	7.95856	-4.15894	-0.90897	1.30115	2.33896
935.21	187.644	8.02886	-4.16829	-0.910818	1.3055	2.34854
935.45	188.379	8.0998	-4.17747	-0.912633	1.30983	2.35809
935.69	189.115	8.17139	-4.18649	-0.914414	1.31413	2.36759
935.92	189.851	8.24362	-4.19535	-0.916161	1.31839	2.37706
936.15	190.587	8.31651	-4.20403	-0.917874	1.32262	2.38648
936.39	191.324	8.39006	-4.21255	-0.919552	1.32682	2.39586
936.62	192.062	8.46426	-4.2209	-0.921195	1.33099	2.4052
936.86	192.8	8.53913	-4.22908	-0.922804	1.33512	2.41449
937.1	193.538	8.61466	-4.23708	-0.924377	1.33923	2.42374
937.34	194.277	8.69085	-4.24492	-0.925915	1.3433	2.43295
937.6	195.017	8.76772	-4.25258	-0.927418	1.34733	2.44211
937.86	195.756	8.84526	-4.26006	-0.928884	1.35134	2.45123
938.13	196.497	8.92348	-4.26737	-0.930314	1.3553	2.4603
938.42	197.237	9.00238	-4.2745	-0.931708	1.35924	2.46933
938.7	197.978	9.08197	-4.28145	-0.933065	1.36314	2.47831
938.98	198.719	9.16225	-4.28822	-0.934384	1.367	2.48724
939.26	199.461	9.24323	-4.2948	-0.935665	1.37083	2.49613
939.54	200.203	9.32491	-4.3012	-0.936909	1.37463	2.50496
939.83	200.946	9.40728	-4.30741	-0.938115	1.37838	2.51375
940.12	201.688	9.49037	-4.31343	-0.939281	1.3821	2.52249
940.39	202.431	9.57417	-4.31926	-0.940409	1.38579	2.53117
940.66	203.175	9.65868	-4.3249	-0.941498	1.38943	2.53981
940.91	203.918	9.74392	-4.33035	-0.942546	1.39304	2.54839
941.15	204.662	9.82987	-4.3356	-0.943555	1.39661	2.55693
941.39	205.407	9.91656	-4.34065	-0.944523	1.40014	2.56541
941.63	206.151	10.004	-4.3455	-0.94545	1.40363	2.57383
941.86	206.896	10.0921	-4.35014	-0.946336	1.40708	2.5822
942.09	207.641	10.181	-4.35459	-0.94718	1.41049	2.59052
942.32	208.386	10.2707	-4.35883	-0.947982	1.41386	2.59878
942.56	209.131	10.3611	-4.36286	-0.948742	1.41719	2.60698
942.79	209.877	10.4523	-4.36668	-0.949459	1.42048	2.61513
943.03	210.622	10.5442	-4.3703	-0.950133	1.42373	2.62322
943.27	211.368	10.6369	-4.3737	-0.950764	1.42694	2.63125
943.52	212.114	10.7303	-4.37689	-0.951351	1.4301	2.63923
943.76	212.861	10.8245	-4.37987	-0.951895	1.43322	2.64714
943.99	213.607	10.9195	-4.38263	-0.952394	1.4363	2.655
944.22	214.353	11.0153	-4.38517	-0.952848	1.43934	2.66279
944.45	215.1	11.1118	-4.38749	-0.953257	1.44233	2.67052
944.68	215.847	11.2092	-4.38958	-0.95362	1.44527	2.6782
944.9	216.593	11.3073	-4.39145	-0.953937	1.44817	2.6858
945.12	217.34	11.4063	-4.39309	-0.954206	1.45103	2.69335
945.35	218.087	11.506	-4.3945	-0.954428	1.45384	2.70082
945.57	218.833	11.6066	-4.39567	-0.954603	1.4566	2.70824
945.8	219.58	11.708	-4.39661	-0.954728	1.45931	2.71558
946.04	220.327	11.8102	-4.3973	-0.954804	1.46197	2.72285
946.28	221.073	11.9133	-4.39776	-0.954831	1.46459	2.73006
946.52	221.82	12.0171	-4.39797	-0.954808	1.46716	2.7372
946.78	222.566	12.1219	-4.39793	-0.954733	1.46967	2.74426
947.05	223.312	12.2275	-4.39764	-0.954607	1.47214	2.75125
947.32	224.059	12.3339	-4.39709	-0.954429	1.47455	2.75817
947.59	224.804	12.4413	-4.39629	-0.954198	1.47691	2.76501
947.86	225.55	12.5494	-4.39523	-0.953913	1.47922	2.77178
948.13	226.295	12.6585	-4.39391	-0.953575	1.48147	2.77847
948.4	227.04	12.7685	-4.39232	-0.953182	1.48367	2.78508
948.68	227.785	12.8793	-4.39046	-0.952735	1.48582	2.79161
948.96	228.53	12.991	-4.38834	-0.952233	1.48791	2.79807
949.22	229.274	13.1037	-4.38595	-0.951675	1.48994	2.80444
949.48	230.018	13.2172	-4.38329	-0.951062	1.49192	2.81074
949.72	230.762	13.3316	-4.38035	-0.950393	1.49384	2.81695
949.96	231.505	13.447	-4.37714	-0.949667	1.49571	2.82309
950.19	232.248	13.5632	-4.37366	-0.948885	1.49752	2.82914
950.41	232.99	13.6804	-4.36989	-0.948045	1.49927	2.8351
950.64	233.733	13.7985	-4.36585	-0.947147	1.50097	2.84099
950.86	234.474	13.9175	-4.36152	-0.946192	1.5026	2.84679
951.08	235.216	14.0374	-4.3569	-0.945178	1.50418	2.8525
951.31	235.957	14.1583	-4.35201	-0.944106	1.5057	2.85813
951.53	236.697	14.2802	-4.34682	-0.942975	1.50716	2.86368
951.76	237.438	14.4029	-4.34135	-0.941785	1.50856	2.86914
951.99	238.177	14.5266	-4.33558	-0.940536	1.5099	2.87451
952.22	238.917	14.6513	-4.32953	-0.939226	1.51118	2.87979
952.46	239.656	14.7769	-4.32318	-0.937857	1.5124	2.88499
952.69	240.394	14.9035	-4.31654	-0.936427	1.51355	2.89009
952.91	241.132	15.031	-4.3096	-0.934936	1.51465	2.89511
953.13	241.87	15.1596	-4.30236	-0.933384	1.51568	2.90004
953.35	242.606	15.289	-4.29482	-0.93177	1.51665	2.90488
953.57	243.343	15.4195	-4.28697	-0.930094	1.51756	2.90962
953.78	244.079	15.5509	-4.27883	-0.928357	1.51841	2.91428
954	244.814	15.6833	-4.27038	-0.926557	1.51919	2.91884
954.22	245.549	15.8167	-4.26163	-0.924696	1.51991	2.92331
954.43	246.284	15.9511	-4.25258	-0.922772	1.52057	2.92769
954.65	247.018	16.0865	-4.24322	-0.920785	1.52117	2.93198
954.88	247.751	16.2229	-4.23356	-0.918737	1.5217	2.93618
955.11	248.484	16.3602	-4.22358	-0.916625	1.52216	2.94028
955.35	249.217	16.4986	-4.21331	-0.914451	1.52257	2.94429
955.59	249.948	16.6379	-4.20272	-0.912213	1.52291	2.94821
955.85	250.68	16.7783	-4.19182	-0.909912	1.52318	2.95203
956.11	251.411	16.9196	-4.18061	-0.907546	1.52339	2.95576
956.38	252.141	17.062	-4.16908	-0.905116	1.52354	2.9594
956.64	252.871	17.2054	-4.15723	-0.902621	1.52361	2.96293
956.9	253.6	17.3498	-4.14507	-0.900061	1.52363	2.96637
957.16	254.328	17.4952	-4.13258	-0.897435	1.52357	2.96972
957.43	255.056	17.6417	-4.11977	-0.894743	1.52345	2.97296
957.7	255.783	17.7892	-4.10664	-0.891985	1.52326	2.9761
957.95	256.51	17.9378	-4.09317	-0.889159	1.523	2.97915
958.2	257.236	18.0874	-4.07938	-0.886266	1.52267	2.98209
958.43	257.961	18.2381	-4.06525	-0.883304	1.52227	2.98493
958.66	258.686	18.3898	-4.05078	-0.880274	1.5218	2.98767
958.89	259.41	18.5427	-4.03597	-0.877173	1.52126	2.9903
959.11	260.132	18.6965	-4.02082	-0.874002	1.52065	2.99283
959.33	260.855	18.8515	-4.00533	-0.870761	1.51996	2.99525
959.54	261.576	19.0076	-3.98948	-0.867448	1.51921	2.99756
959.76	262.297	19.1648	-3.97329	-0.864064	1.51837	2.99976
959.97	263.016	19.323	-3.95674	-0.860608	1.51747	3.00186
960.19	263.735	19.4824	-3.93984	-0.857081	1.51649	3.00384
960.4	264.453	19.6428	-3.92259	-0.853481	1.51543	3.00572
960.62	265.17	19.8044	-3.90499	-0.849808	1.51431	3.00748
960.84	265.887	19.9671	-3.88703	-0.846063	1.5131	3.00914
961.07	266.602	20.1309	-3.86871	-0.842245	1.51182	3.01069
961.3	267.317	20.2958	-3.85003	-0.838354	1.51047	3.01212
961.52	268.03	20.4618	-3.83098	-0.834387	1.50904	3.01344
961.73	268.743	20.629	-3.81158	-0.830347	1.50753	3.01464
961.95	269.455	20.7974	-3.7918	-0.826231	1.50594	3.01573
962.16	270.166	20.9668	-3.77165	-0.82204	1.50428	3.01671
962.37	270.876	21.1374	-3.75113	-0.817773	1.50254	3.01757
962.57	271.585	21.3092	-3.73024	-0.81343	1.50072	3.01831
962.78	272.292	21.4821	-3.70898	-0.80901	1.49882	3.01894
962.99	272.999	21.6562	-3.68733	-0.804513	1.49684	3.01944
963.2	273.705	21.8315	-3.66531	-0.799939	1.49478	3.01983
963.41	274.41	22.0079	-3.64291	-0.795287	1.49264	3.0201
963.63	275.114	22.1855	-3.62012	-0.790558	1.49042	3.02025
963.85	275.817	22.3642	-3.59695	-0.785749	1.48811	3.02028
964.07	276.519	22.5442	-3.5734	-0.780861	1.48573	3.02019
964.3	277.219	22.7254	-3.54945	-0.775893	1.48326	3.01998
964.54	277.919	22.9077	-3.52511	-0.770845	1.48072	3.01964
964.8	278.617	23.0912	-3.50038	-0.765717	1.47808	3.01918
965.05	279.315	23.276	-3.47526	-0.760509	1.47537	3.0186
965.3	280.011	23.4619	-3.44975	-0.75522	1.47258	3.01789
965.55	280.706	23.649	-3.42384	-0.74985	1.4697	3.01706
965.81	281.4	23.8373	-3.39753	-0.744399	1.46674	3.01611
966.06	282.093	24.0269	-3.37083	-0.738866	1.46369	3.01503
966.32	282.784	24.2176	-3.34374	-0.733253	1.46056	3.01383
966.58	283.475	24.4096	-3.31625	-0.727557	1.45736	3.01251
966.82	284.164	24.6027	-3.28836	-0.721779	1.45406	3.01106
967.05	284.853	24.7971	-3.26006	-0.715918	1.45069	3.00948
967.28	285.54	24.9927	-3.23137	-0.709974	1.44723	3.00778
967.5	286.226	25.1895	-3.20227	-0.703946	1.44368	3.00595
967.72	286.91	25.3876	-3.17276	-0.697833	1.44005	3.004
967.93	287.594	25.5868	-3.14284	-0.691636	1.43634	3.00192
968.14	288.276	25.7873	-3.11251	-0.685354	1.43254	2.99971
968.35	288.957	25.9891	-3.08177	-0.678986	1.42865	2.99737
968.55	289.637	26.1921	-3.05061	-0.672532	1.42468	2.9949
968.76	290.315	26.3963	-3.01905	-0.665992	1.42063	2.9923
968.97	290.992	26.6018	-2.98706	-0.659365	1.41648	2.98957
969.18	291.668	26.8085	-2.95465	-0.65265	1.41226	2.98671
969.39	292.342	27.0165	-2.92183	-0.645848	1.40794	2.98372
969.6	293.015	27.2258	-2.88858	-0.638956	1.40354	2.9806
969.82	293.687	27.4363	-2.8549	-0.631976	1.39905	2.97734
970.04	294.357	27.648	-2.8208	-0.624906	1.39448	2.97396
970.25	295.026	27.8611	-2.78627	-0.617746	1.38981	2.97043
970.46	295.694	28.0754	-2.75131	-0.610496	1.38506	2.96678
970.67	296.36	28.291	-2.71593	-0.603155	1.38022	2.96299
970.87	297.024	28.5078	-2.68011	-0.595724	1.3753	2.95907
971.07	297.688	28.7259	-2.64386	-0.588202	1.37029	2.95502
971.27	298.349	28.9453	-2.60719	-0.580589	1.36519	2.95083
971.47	299.01	29.1659	-2.57008	-0.572885	1.36	2.94651
971.67	299.669	29.3878	-2.53255	-0.56509	1.35473	2.94205
971.87	300.326	29.611	-2.49458	-0.557203	1.34937	2.93747
972.08	300.982	29.8355	-2.45617	-0.549223	1.34393	2.93275
972.28	301.637	30.0613	-2.41733	-0.541151	1.3384	2.92789
972.49	302.29	30.2883	-2.37806	-0.532987	1.33278	2.9229
972.7	302.942	30.5166	-2.33835	-0.524729	1.32707	2.91778
972.92	303.593	30.7462	-2.29821	-0.516378	1.32128	2.91252
973.15	304.241	30.977	-2.25762	-0.507935	1.3154	2.90713
973.38	304.889	31.2092	-2.21661	-0.499397	1.30943	2.90161
973.62	305.535	31.4426	-2.17515	-0.490766	1.30338	2.89595
973.86	306.179	31.6773	-2.13326	-0.482041	1.29724	2.89016
974.11	306.822	31.9133	-2.09093	-0.473222	1.29102	2.88423
974.35	307.464	32.1505	-2.04816	-0.464309	1.28471	2.87818
974.6	308.104	32.3891	-2.00496	-0.455301	1.27832	2.87199
974.84	308.743	32.6289	-1.96132	-0.446198	1.27184	2.86566
975.09	309.38	32.87	-1.91724	-0.436999	1.26528	2.85921
975.34	310.016	33.1124	-1.87272	-0.427706	1.25863	2.85262
975.57	310.65	33.356	-1.82776	-0.418317	1.2519	2.8459
975.8	311.283	33.6009	-1.78237	-0.408833	1.24508	2.83905
976.02	311.914	33.8471	-1.73654	-0.399253	1.23819	2.83207
976.24	312.544	34.0946	-1.69027	-0.389578	1.23121	2.82496
976.45	313.173	34.3433	-1.64357	-0.379808	1.22414	2.81772
976.65	313.8	34.5933	-1.59644	-0.369942	1.217	2.81035
976.85	314.425	34.8445	-1.54887	-0.35998	1.20978	2.80286
977.06	315.05	35.097	-1.50087	-0.349923	1.20247	2.79523
977.26	315.673	35.3508	-1.45244	-0.339769	1.19509	2.78748
977.46	316.294	35.6058	-1.40357	-0.329519	1.18762	2.7796
977.65	316.914	35.8621	-1.35427	-0.319173	1.18008	2.7716
977.86	317.533	36.1196	-1.30454	-0.308729	1.17246	2.76346
978.06	318.15	36.3784	-1.25437	-0.298189	1.16475	2.7552
978.26	318.765	36.6385	-1.20376	-0.28755	1.15697	2.74681
978.47	319.38	36.8998	-1.15272	-0.276815	1.14911	2.7383
978.68	319.992	37.1623	-1.10124	-0.26598	1.14116	2.72966
978.89	320.604	37.4262	-1.04932	-0.255048	1.13314	2.72088
979.09	321.214	37.6913	-0.996963	-0.244017	1.12505	2.71199
979.3	321.822	37.9576	-0.944166	-0.232886	1.11687	2.70296
979.49	322.429	38.2253	-0.890929	-0.221656	1.10861	2.69381
979.69	323.034	38.4942	-0.837249	-0.210325	1.10028	2.68453
979.88	323.638	38.7643	-0.783124	-0.198893	1.09186	2.67512
980.08	324.24	39.0357	-0.728554	-0.18736	1.08337	2.66558
980.27	324.841	39.3084	-0.673537	-0.175726	1.0748	2.65592
980.46	325.44	39.5824	-0.618074	-0.163989	1.06615	2.64612
980.66	326.038	39.8576	-0.562163	-0.15215	1.05742	2.6362
980.85	326.634	40.1341	-0.505804	-0.140208	1.04861	2.62615
981.05	327.228	40.4119	-0.448997	-0.128164	1.03973	2.61597
981.25	327.821	40.691	-0.391742	-0.116016	1.03076	2.60566
981.45	328.413	40.9713	-0.334039	-0.103766	1.02172	2.59523
981.66	329.002	41.2529	-0.275888	-0.0914114	1.01261	2.58466
981.88	329.591	41.5357	-0.217287	-0.0789532	1.00341	2.57397
982.09	330.177	41.8198	-0.158233	-0.0663903	0.994144	2.56315
982.32	330.762	42.1052	-0.0987266	-0.0537223	0.984796	2.55221
982.56	331.345	42.3919	-0.0387653	-0.0409488	0.975371	2.54113
982.79	331.927	42.6798	0.0216514	-0.0280694	0.965868	2.52992
983.03	332.507	42.9691	0.0825253	-0.0150837	0.956289	2.51859
983.27	333.085	43.2596	0.143857	-0.00199114	0.946632	2.50712
983.5	333.662	43.5514	0.205649	0.0112086	0.936897	2.49553
983.74	334.237	43.8444	0.267901	0.0245161	0.927086	2.48381
983.99	334.81	44.1388	0.330614	0.0379314	0.917197	2.47195
984.22	335.381	44.4344	0.393786	0.0514548	0.907233	2.45997
984.44	335.951	44.7313	0.45742	0.0650868	0.897192	2.44786
984.66	336.519	45.0295	0.521516	0.0788279	0.887075	2.43562
984.87	337.086	45.329	0.586075	0.0926785	0.876883	2.42325
985.07	337.65	45.6298	0.651097	0.106639	0.866615	2.41075
985.28	338.213	45.9318	0.716583	0.12071	0.856272	2.39812
985.47	338.774	46.2351	0.782532	0.134891	0.845855	2.38536
985.67	339.333	46.5397	0.848944	0.149183	0.835363	2.37248
985.87	339.891	46.8455	0.915819	0.163585	0.824798	2.35947
986.06	340.447	47.1526	0.983157	0.178099	0.814161	2.34633
986.25	341.001	47.461	1.05095	0.192725	0.803451	2.33307
986.44	341.553	47.7706	1.11921	0.207461	0.79267	2.31968
986.64	342.104	48.0815	1.18793	0.222309	0.781819	2.30617
986.83	342.653	48.3937	1.2571	0.237268	0.770898	2.29253
987.03	343.2	48.7071	1.32673	0.25234	0.759907	2.27877
987.23	343.745	49.0217	1.39683	0.267524	0.748848	2.26489
987.43	344.289	49.3376	1.46738	0.282821	0.73772	2.25089
987.63	344.831	49.6547	1.53839	0.298231	0.726524	2.23676
987.83	345.371	49.973	1.60986	0.313754	0.71526	2.22252
988.03	345.909	50.2927	1.68179	0.329392	0.703928	2.20815
988.22	346.446	50.6135	1.75418	0.345145	0.692528	2.19365
988.41	346.981	50.9356	1.82704	0.361013	0.681061	2.17904
988.6	347.514	51.259	1.90036	0.376996	0.669527	2.1643
988.79	348.045	51.5835	1.97415	0.393096	0.657926	2.14944
988.97	348.574	51.9094	2.04839	0.409311	0.646261	2.13446
989.16	349.101	52.2364	2.1231	0.425643	0.634529	2.11936
989.34	349.627	52.5647	2.19827	0.442091	0.622734	2.10414
989.53	350.151	52.8942	2.27391	0.458658	0.610873	2.0888
989.72	350.672	53.225	2.35001	0.475342	0.598949	2.07334
989.91	351.192	53.5569	2.42658	0.492145	0.586961	2.05776
990.11	351.71	53.8901	2.50361	0.509066	0.574911	2.04206
990.3	352.227	54.2245	2.58111	0.526107	0.562797	2.02625
990.5	352.741	54.5602	2.65907	0.543267	0.550622	2.01031
990.71	353.253	54.8971	2.7375	0.560547	0.538384	1.99426
990.92	353.764	55.2351	2.81639	0.577947	0.526086	1.97808
991.14	354.272	55.5744	2.89574	0.595466	0.513728	1.9618
991.36	354.779	55.9149	2.97556	0.613106	0.501311	1.94539
991.59	355.284	56.2566	3.05584	0.630866	0.488835	1.92887
991.82	355.787	56.5995	3.13658	0.648748	0.4763	1.91224
992.05	356.288	56.9436	3.21778	0.66675	0.463708	1.89549
992.28	356.787	57.2889	3.29945	0.684874	0.451057	1.87863
992.51	357.284	57.6354	3.38158	0.70312	0.43835	1.86165
992.75	357.779	57.9831	3.46417	0.721488	0.425585	1.84456
992.97	358.272	58.332	3.54723	0.739979	0.412764	1.82736
993.19	358.764	58.6821	3.63076	0.758593	0.399886	1.81004
993.4	359.253	59.0334	3.71474	0.77733	0.386952	1.79261
993.6	359.741	59.3859	3.7992	0.79619	0.373963	1.77507
993.8	360.226	59.7396	3.88411	0.815174	0.360919	1.75741
994	360.71	60.0945	3.96949	0.834282	0.347821	1.73964
994.19	361.192	60.4505	4.05533	0.853513	0.33467	1.72177
994.38	361.671	60.8078	4.14163	0.872869	0.321466	1.70378
994.57	362.149	61.1662	4.22839	0.892349	0.30821	1.68568
994.76	362.625	61.5258	4.31562	0.911954	0.294903	1.66748
994.95	363.099	61.8865	4.4033	0.931684	0.281546	1.64916
995.13	363.571	62.2484	4.49144	0.951539	0.268139	1.63074
995.32	364.041	62.6115	4.58004	0.971519	0.254682	1.61222
995.51	364.51	62.9757	4.66909	0.991624	0.241178	1.59359
995.69	364.976	63.3411	4.75861	1.01185	0.227625	1.57485
995.88	365.441	63.7076	4.84857	1.03221	0.214026	1.55601
996.08	365.903	64.0753	4.93899	1.05269	0.200381	1.53707
996.27	366.364	64.4441	5.02986	1.0733	0.186691	1.51803
996.47	366.823	64.814	5.12117	1.09403	0.172957	1.49889
996.66	367.28	65.1851	5.21294	1.11489	0.15918	1.47964
996.85	367.736	65.5573	5.30515	1.13587	0.14536	1.4603
997.03	368.189	65.9306	5.39782	1.15698	0.131498	1.44086
997.22	368.641	66.305	5.49093	1.17821	0.117594	1.42132
997.4	369.09	66.6806	5.58448	1.19957	0.103649	1.40169
997.58	369.538	67.0572	5.67849	1.22106	0.089663	1.38196
997.76	369.984	67.435	5.77295	1.24268	0.0756367	1.36213
997.94	370.429	67.8139	5.86785	1.26442	0.0615705	1.3422
998.12	370.871	68.1939	5.9632	1.28629	0.047465	1.32218
998.3	371.311	68.575	6.059	1.30829	0.033321	1.30206
998.48	371.75	68.9572	6.15524	1.33042	0.0191392	1.28185
998.67	372.187	69.3406	6.25193	1.35268	0.00492009	1.26154
998.85	372.622	69.725	6.34907	1.37506	-0.00933597	1.24114
999.04	373.055	70.1105	6.44665	1.39758	-0.0236284	1.22065
999.23	373.486	70.4971	6.54469	1.42022	-0.0379567	1.20006
999.43	373.915	70.8848	6.64316	1.443	-0.0523203	1.17938
999.63	374.343	71.2736	6.74209	1.4659	-0.0667186	1.15861
999.84	374.768	71.6635	6.84146	1.48894	-0.0811513	1.13775
1000.1	375.192	72.0545	6.94128	1.5121	-0.0956178	1.11679
1000.3	375.613	72.4465	7.04155	1.5354	-0.110118	1.09575
1000.5	376.033	72.8397	7.14226	1.55883	-0.12465	1.07461
1000.7	376.451	73.2339	7.24342	1.58239	-0.139214	1.05339
1000.9	376.867	73.6292	7.34502	1.60608	-0.153809	1.03207
1001.2	377.282	74.0255	7.44706	1.6299	-0.168435	1.01067
1001.4	377.694	74.4229	7.54954	1.65386	-0.183091	0.989187
1001.6	378.105	74.8214	7.65247	1.67795	-0.197777	0.967612
1001.8	378.513	75.221	7.75585	1.70217	-0.212492	0.94595
1002	378.92	75.6216	7.85966	1.72652	-0.227236	0.924202
1002.2	379.325	76.0233	7.96392	1.75101	-0.242009	0.902367
1002.4	379.728	76.426	8.06863	1.77562	-0.25681	0.880446
1002.6	380.129	76.8299	8.17378	1.80038	-0.271638	0.85844
1002.8	380.528	77.2347	8.27937	1.82527	-0.286495	0.836348
1003	380.926	77.6407	8.38541	1.85029	-0.301378	0.814172
1003.2	381.321	78.0476	8.49189	1.87544	-0.316287	0.791912
1003.4	381.715	78.4557	8.59882	1.90073	-0.331221	0.769569
1003.5	382.107	78.8648	8.70618	1.92616	-0.346179	0.747144
1003.7	382.497	79.2749	8.81399	1.95172	-0.361161	0.724637
1003.9	382.885	79.686	8.92223	1.97742	-0.376166	0.70205
1004.1	383.271	80.0982	9.03091	2.00325	-0.391192	0.679383
1004.3	383.655	80.5114	9.14003	2.02921	-0.40624	0.656638
1004.4	384.038	80.9257	9.24959	2.05532	-0.421308	0.633815
1004.6	384.418	81.3409	9.35958	2.08156	-0.436394	0.610915
1004.8	384.797	81.7572	9.47001	2.10793	-0.451499	0.58794
1005	385.174	82.1744	9.58087	2.13444	-0.466621	0.56489
1005.2	385.549	82.5927	9.69215	2.16109	-0.481758	0.541768
1005.4	385.923	83.0119	9.80387	2.18787	-0.49691	0.518575
1005.6	386.294	83.4321	9.91601	2.21479	-0.512075	0.495312
1005.7	386.664	83.8533	10.0286	2.24185	-0.527252	0.471981
1005.9	387.032	84.2755	10.1415	2.26904	-0.54244	0.448583
1006.1	387.399	84.6986	10.2549	2.29637	-0.557637	0.425119
1006.3	387.763	85.1226	10.3688	2.32383	-0.572844	0.40159
1006.4	388.126	85.5477	10.483	2.35143	-0.588058	0.377997
1006.6	388.487	85.9736	10.5977	2.37917	-0.603279	0.354341
1006.8	388.847	86.4005	10.7127	2.40705	-0.618506	0.330623
1007	389.204	86.8283	10.8282	2.43506	-0.633738	0.306843
1007.1	389.56	87.2571	10.9441	2.46321	-0.648974	0.283004
1007.3	389.915	87.6867	11.0604	2.4915	-0.664213	0.259106
1007.5	390.267	88.1173	11.1771	2.51993	-0.679453	0.235151
1007.7	390.618	88.5487	11.2942	2.54849	-0.694693	0.211142
1007.9	390.967	88.9811	11.4118	2.5772	-0.709931	0.187078
1008	391.315	89.4143	11.5297	2.60604	-0.725167	0.162962
1008.2	391.66	89.8484	11.648	2.63502	-0.740399	0.138794
1008.4	392.004	90.2834	11.7667	2.66414	-0.755625	0.114577
1008.6	392.347	90.7193	11.8859	2.6934	-0.770844	0.0903121
1008.8	392.688	91.1559	12.0054	2.72279	-0.786055	0.0660003
1009	393.027	91.5935	12.1253	2.75233	-0.801258	0.041643
1009.3	393.364	92.0318	12.2456	2.78201	-0.81645	0.0172414
1009.5	393.7	92.471	12.3663	2.81182	-0.83163	-0.00720293
1009.7	394.034	92.911	12.4874	2.84178	-0.846797	-0.0316883
1009.9	394.367	93.3518	12.6088	2.87187	-0.86195	-0.0562131
1010.1	394.698	93.7934	12.7307	2.90211	-0.877087	-0.0807755
1010.3	395.028	94.2358	12.8529	2.93248	-0.892206	-0.105374
1010.5	395.356	94.679	12.9755	2.96299	-0.907308	-0.130008
1010.7	395.682	95.123	13.0985	2.99364	-0.922391	-0.154676
1010.9	396.007	95.5677	13.2218	3.02444	-0.937453	-0.179377
1011.1	396.33	96.0132	13.3455	3.05537	-0.952493	-0.204109
1011.3	396.652	96.4595	13.4696	3.08644	-0.967511	-0.228871
1011.5	396.973	96.9065	13.5941	3.11765	-0.982506	-0.253663
1011.7	397.292	97.3543	13.7189	3.14901	-0.997477	-0.278483
1011.9	397.609	97.8028	13.8441	3.1805	-1.01242	-0.30333
1012	397.925	98.2521	13.9697	3.21213	-1.02734	-0.328203
1012.2	398.24	98.702	14.0956	3.2439	-1.04223	-0.353099
1012.4	398.553	99.1527	14.2219	3.27582	-1.05709	-0.378016
1012.6	398.864	99.6041	14.3485	3.30787	-1.07192	-0.402954
1012.7	399.174	100.056	14.4755	3.34006	-1.08671	-0.427909
1012.9	399.483	100.509	14.6028	3.3724	-1.10147	-0.452882
1013.1	399.791	100.962	14.7305	3.40487	-1.1162	-0.477868
1013.3	400.097	101.417	14.8585	3.43749	-1.13088	-0.502866
1013.5	400.402	101.871	14.9869	3.47024	-1.14553	-0.527876
1013.6	400.705	102.327	15.1156	3.50314	-1.16014	-0.552894
1013.8	401.008	102.783	15.2446	3.53617	-1.1747	-0.57792
1014	401.309	103.239	15.374	3.56935	-1.18922	-0.602951
1014.2	401.608	103.697	15.5037	3.60266	-1.2037	-0.627985
1014.4	401.907	104.155	15.6338	3.63612	-1.21812	-0.653021
1014.5	402.204	104.613	15.7641	3.66971	-1.2325	-0.678055
1014.7	402.5	105.072	15.8948	3.70344	-1.24683	-0.703087
1014.9	402.795	105.532	16.0258	3.73732	-1.2611	-0.728115
1015	403.089	105.992	16.1571	3.77133	-1.27532	-0.753137
1015.2	403.381	106.453	16.2887	3.80548	-1.28949	-0.778151
1015.4	403.673	106.914	16.4206	3.83978	-1.3036	-0.803156
1015.5	403.963	107.376	16.5528	3.87421	-1.31765	-0.828151
1015.7	404.252	107.838	16.6854	3.90878	-1.33165	-0.853135
1015.9	404.541	108.301	16.8182	3.94349	-1.34559	-0.878106
1016.1	404.828	108.764	16.9514	3.97835	-1.35946	-0.903064
1016.2	405.114	109.228	17.0848	4.01334	-1.37327	-0.928006
1016.4	405.398	109.693	17.2186	4.04848	-1.38702	-0.952932
1016.6	405.682	110.158	17.3527	4.08376	-1.40071	-0.977839
1016.8	405.965	110.623	17.487	4.11917	-1.41433	-1.00273
1016.9	406.247	111.089	17.6216	4.15473	-1.42788	-1.02759
1017.1	406.527	111.555	17.7566	4.19043	-1.44137	-1.05244
1017.3	406.807	112.022	17.8918	4.22628	-1.45478	-1.07726
1017.5	407.085	112.489	18.0273	4.26226	-1.46813	-1.10206
1017.7	407.362	112.957	18.1631	4.29839	-1.4814	-1.12683
1017.9	407.639	113.425	18.2992	4.33466	-1.4946	-1.15158
1018.1	407.914	113.894	18.4356	4.37107	-1.50772	-1.17629
1018.3	408.188	114.363	18.5723	4.40763	-1.52078	-1.20098
1018.5	408.462	114.833	18.7092	4.44433	-1.53375	-1.22564
1018.8	408.734	115.303	18.8465	4.48118	-1.54665	-1.25027
1019	409.005	115.773	18.984	4.51817	-1.55947	-1.27486
1019.2	409.275	116.244	19.1218	4.5553	-1.57221	-1.29943
1019.4	409.544	116.715	19.2599	4.59257	-1.58487	-1.32396
1019.7	409.812	117.186	19.3982	4.62999	-1.59746	-1.34845
1019.9	410.079	117.658	19.5369	4.66756	-1.60996	-1.37291
1020.1	410.345	118.131	19.6758	4.70527	-1.62238	-1.39733
1020.4	410.61	118.603	19.815	4.74313	-1.63471	-1.42172
1020.6	410.874	119.076	19.9545	4.78114	-1.64696	-1.44607
1020.9	411.137	119.55	20.0943	4.81929	-1.65914	-1.47038
1021.1	411.399	120.024	20.2343	4.85759	-1.67122	-1.49466
1021.4	411.66	120.498	20.3746	4.89603	-1.68322	-1.5189
1021.6	411.92	120.973	20.5152	4.93463	-1.69514	-1.54309
1021.9	412.178	121.448	20.6561	4.97337	-1.70697	-1.56725
1022.1	412.436	121.923	20.7973	5.01226	-1.71871	-1.59137
1022.4	412.692	122.399	20.9387	5.0513	-1.73036	-1.61544
1022.6	412.948	122.875	21.0804	5.09049	-1.74192	-1.63947
1022.8	413.202	123.352	21.2224	5.12983	-1.75339	-1.66346
1023	413.456	123.829	21.3646	5.16931	-1.76477	-1.6874
1023.2	413.708	124.306	21.5071	5.20895	-1.77605	-1.71129
1023.4	413.959	124.783	21.6499	5.24874	-1.78724	-1.73514
1023.6	414.21	125.261	21.793	5.28868	-1.79833	-1.75893
1023.8	414.459	125.739	21.9363	5.32877	-1.80932	-1.78268
1024	414.707	126.218	22.0799	5.36901	-1.82022	-1.80637
1024.2	414.954	126.696	22.2237	5.4094	-1.83102	-1.83001
1024.4	415.2	127.175	22.3679	5.44994	-1.84171	-1.85359
1024.6	415.446	127.655	22.5122	5.49064	-1.85231	-1.87712
1024.8	415.69	128.134	22.6569	5.53149	-1.86279	-1.90058
1025	415.933	128.614	22.8017	5.57249	-1.87318	-1.92399
1025.3	416.175	129.094	22.9469	5.61364	-1.88346	-1.94734
1025.5	416.416	129.574	23.0923	5.65494	-1.89363	-1.97063
1025.7	416.656	130.055	23.2379	5.6964	-1.90369	-1.99386
1025.9	416.895	130.536	23.3838	5.73802	-1.91365	-2.01703
1026.1	417.133	131.017	23.53	5.77978	-1.9235	-2.04013
1026.3	417.37	131.498	23.6764	5.82171	-1.93324	-2.06318
1026.5	417.606	131.98	23.8231	5.86379	-1.94287	-2.08616
1026.7	417.841	132.462	23.9701	5.90603	-1.95239	-2.10908
1026.9	418.074	132.944	24.1173	5.94842	-1.96179	-2.13194
1027.1	418.307	133.426	24.2647	5.99097	-1.97109	-2.15473
1027.3	418.538	133.909	24.4124	6.03368	-1.98027	-2.17745
1027.5	418.769	134.392	24.5604	6.07655	-1.98934	-2.20011
1027.7	418.998	134.874	24.7086	6.11958	-1.99829	-2.2227
1027.9	419.226	135.358	24.8571	6.16276	-2.00712	-2.24522
1028.1	419.453	135.841	25.0058	6.20611	-2.01584	-2.26767
1028.3	419.678	136.325	25.1548	6.24962	-2.02444	-2.29006
1028.5	419.903	136.808	25.3041	6.29328	-2.03292	-2.31237
1028.7	420.126	137.292	25.4536	6.33711	-2.04128	-2.33461
1028.9	420.349	137.776	25.6033	6.38111	-2.04952	-2.35678
1029.1	420.57	138.261	25.7533	6.42526	-2.05764	-2.37888
1029.3	420.79	138.745	25.9036	6.46957	-2.06563	-2.4009
1029.5	421.009	139.23	26.0541	6.51405	-2.07351	-2.42284
1029.7	421.226	139.715	26.2048	6.55869	-2.08125	-2.44471
1029.9	421.443	140.2	26.3558	6.6035	-2.08887	-2.4665
1030.1	421.658	140.685	26.5071	6.64847	-2.09636	-2.48822
1030.3	421.872	141.17	26.6586	6.6936	-2.10373	-2.50986
1030.6	422.085	141.656	26.8103	6.7389	-2.11097	-2.53141
1030.8	422.297	142.141	26.9623	6.78437	-2.11808	-2.55289
1031	422.507	142.627	27.1146	6.83	-2.12506	-2.57429
1031.3	422.716	143.113	27.2671	6.87579	-2.13191	-2.59561
1031.5	422.925	143.599	27.4198	6.92176	-2.13863	-2.61685
1031.8	423.131	144.085	27.5728	6.96789	-2.14521	-2.63801
1032	423.337	144.571	27.7261	7.01419	-2.15167	-2.65908
1032.3	423.542	145.058	27.8796	7.06065	-2.15799	-2.68006
1032.5	423.745	145.544	28.0333	7.10728	-2.16417	-2.70096
1032.7	423.947	146.031	28.1873	7.15409	-2.17022	-2.72178
1032.9	424.148	146.517	28.3415	7.20106	-2.17612	-2.7425
1033.2	424.348	147.004	28.496	7.2482	-2.18189	-2.76314
1033.4	424.546	147.491	28.6507	7.29551	-2.18752	-2.78369
1033.6	424.743	147.978	28.8056	7.34298	-2.19301	-2.80414
1033.8	424.939	148.465	28.9608	7.39063	-2.19836	-2.8245
1034	425.134	148.952	29.1162	7.43845	-2.20356	-2.84477
1034.2	425.328	149.439	29.2718	7.48644	-2.20862	-2.86494
1034.4	425.521	149.926	29.4277	7.5346	-2.21353	-2.88501
1034.6	425.712	150.414	29.5838	7.58293	-2.21829	-2.90499
1034.8	425.902	150.901	29.7401	7.63143	-2.2229	-2.92486
1035	426.092	151.388	29.8967	7.6801	-2.22736	-2.94463
1035.2	426.28	151.875	30.0534	7.72894	-2.23167	-2.9643
1035.4	426.466	152.363	30.2104	7.77796	-2.23583	-2.98387
1035.6	426.652	152.85	30.3677	7.82715	-2.23984	-3.00333
1035.8	426.837	153.337	30.5251	7.87651	-2.24369	-3.02269
1036	427.02	153.824	30.6828	7.92604	-2.24739	-3.04194
1036.2	427.202	154.312	30.8407	7.97575	-2.25093	-3.06109
1036.4	427.383	154.799	30.9988	8.02564	-2.25432	-3.08014
1036.6	427.563	155.286	31.1572	8.07569	-2.25755	-3.09908
1036.8	427.742	155.774	31.3158	8.12593	-2.26062	-3.11791
1037	427.919	156.261	31.4746	8.17634	-2.26354	-3.13663
1037.2	428.095	156.748	31.6336	8.22693	-2.2663	-3.15525
1037.4	428.27	157.235	31.7929	8.2777	-2.2689	-3.17376
1037.6	428.443	157.723	31.9524	8.32864	-2.27134	-3.19217
1037.8	428.615	158.21	32.1122	8.37976	-2.27362	-3.21046
1038	428.786	158.697	32.2721	8.43107	-2.27574	-3.22865
1038.1	428.956	159.184	32.4324	8.48256	-2.27771	-3.24674
1038.3	429.124	159.672	32.5928	8.53422	-2.27951	-3.26471
1038.5	429.29	160.159	32.7535	8.58607	-2.28115	-3.28258
1038.7	429.456	160.646	32.9144	8.6381	-2.28263	-3.30033
1038.9	429.62	161.133	33.0756	8.69032	-2.28394	-3.31798
1039.1	429.782	161.62	33.2369	8.74271	-2.28509	-3.33552
1039.3	429.943	162.107	33.3986	8.79529	-2.28608	-3.35294
1039.5	430.103	162.594	33.5604	8.84806	-2.2869	-3.37026
1039.7	430.262	163.081	33.7225	8.90101	-2.28755	-3.38746
1039.9	430.419	163.568	33.8848	8.95414	-2.28804	-3.40455
1040.1	430.574	164.055	34.0474	9.00747	-2.28836	-3.42153
1040.3	430.728	164.542	34.2102	9.06097	-2.28852	-3.43839
1040.5	430.881	165.029	34.3733	9.11467	-2.28851	-3.45515
1040.7	431.032	165.515	34.5366	9.16856	-2.28833	-3.47179
1040.9	431.181	166.002	34.7001	9.22263	-2.28798	-3.48832
1041.1	431.329	166.489	34.8639	9.27689	-2.28747	-3.50474
1041.4	431.476	166.976	35.028	9.33135	-2.28679	-3.52105
1041.6	431.62	167.462	35.1922	9.38599	-2.28593	-3.53725
1041.8	431.764	167.949	35.3568	9.44083	-2.28491	-3.55333
1042.1	431.905	168.435	35.5215	9.49586	-2.28372	-3.56929
1042.3	432.045	168.922	35.6866	9.55108	-2.28235	-3.58514
1042.6	432.184	169.408	35.8518	9.60649	-2.28081	-3.60088
1042.8	432.321	169.894	36.0173	9.6621	-2.27909	-3.6165
1043	432.456	170.381	36.1831	9.7179	-2.27721	-3.632
1043.2	432.59	170.867	36.3491	9.77389	-2.27514	-3.64738
1043.4	432.722	171.353	36.5153	9.83008	-2.2729	-3.66264
1043.7	432.852	171.839	36.6818	9.88647	-2.27048	-3.67779
1043.9	432.981	172.325	36.8485	9.94305	-2.26788	-3.69281
1044.1	433.108	172.811	37.0155	9.99983	-2.26509	-3.7077
1044.3	433.234	173.296	37.1827	10.0568	-2.26213	-3.72247
1044.5	433.358	173.782	37.3501	10.114	-2.25898	-3.73711
1044.7	433.481	174.267	37.5178	10.1713	-2.25564	-3.75162
1044.9	433.602	174.753	37.6857	10.2289	-2.25211	-3.766
1045.1	433.721	175.238	37.8538	10.2867	-2.2484	-3.78025
1045.2	433.839	175.723	38.0222	10.3446	-2.24449	-3.79437
1045.4	433.955	176.207	38.1907	10.4028	-2.24039	-3.80835
1045.6	434.07	176.692	38.3596	10.4611	-2.2361	-3.82219
1045.8	434.183	177.176	38.5286	10.5197	-2.23162	-3.8359
1046	434.294	177.66	38.6978	10.5784	-2.22694	-3.84948
1046.2	434.404	178.145	38.8673	10.6374	-2.22207	-3.86292
1046.4	434.512	178.628	39.037	10.6966	-2.217	-3.87621
1046.6	434.618	179.112	39.207	10.7559	-2.21173	-3.88937
1046.8	434.723	179.595	39.3771	10.8155	-2.20626	-3.90238
1047	434.826	180.079	39.5475	10.8752	-2.20059	-3.91525
1047.2	434.928	180.561	39.7181	10.9352	-2.19472	-3.92798
1047.4	435.028	181.044	39.8889	10.9954	-2.18864	-3.94055
1047.6	435.126	181.527	40.0599	11.0557	-2.18235	-3.95298
1047.8	435.223	182.009	40.2311	11.1163	-2.17585	-3.96526
1048	435.318	182.491	40.4026	11.1771	-2.16915	-3.97738
1048.1	435.412	182.972	40.5742	11.2381	-2.16223	-3.98936
1048.3	435.503	183.453	40.7461	11.2993	-2.15511	-4.00117
1048.5	435.594	183.934	40.9182	11.3607	-2.14776	-4.01283
1048.7	435.682	184.415	41.0904	11.4223	-2.1402	-4.02434
1048.9	435.769	184.895	41.2629	11.4841	-2.13243	-4.03568
1049.1	435.855	185.375	41.4355	11.5461	-2.12443	-4.04686
1049.3	435.939	185.855	41.6084	11.6083	-2.11621	-4.05787
1049.5	436.021	186.334	41.7814	11.6707	-2.10777	-4.06872
1049.6	436.102	186.813	41.9547	11.7334	-2.0991	-4.0794
1049.8	436.181	187.292	42.1281	11.7962	-2.0902	-4.08991
1050	436.259	187.77	42.3017	11.8593	-2.08108	-4.10025
1050.2	436.335	188.248	42.4755	11.9225	-2.07173	-4.11041
1050.4	436.41	188.725	42.6495	11.986	-2.06215	-4.12041
1050.6	436.483	189.202	42.8237	12.0497	-2.05234	-4.13023
1050.8	436.554	189.679	42.998	12.1135	-2.04229	-4.13987
1051	436.624	190.155	43.1726	12.1776	-2.03201	-4.14934
1051.2	436.692	190.63	43.3473	12.2419	-2.0215	-4.15862
1051.4	436.759	191.106	43.5222	12.3065	-2.01074	-4.16773
1051.6	436.824	191.58	43.6972	12.3712	-1.99974	-4.17664
1051.8	436.888	192.054	43.8724	12.4361	-1.9885	-4.18537
1052.1	436.951	192.528	44.0478	12.5013	-1.97701	-4.19391
1052.3	437.011	193.001	44.2233	12.5666	-1.96527	-4.20225
1052.5	437.071	193.474	44.399	12.6322	-1.95328	-4.2104
1052.7	437.129	193.946	44.5748	12.698	-1.94104	-4.21835
1053	437.186	194.418	44.7508	12.764	-1.92854	-4.2261
1053.2	437.241	194.889	44.9269	12.8302	-1.91579	-4.23365
1053.4	437.295	195.359	45.1032	12.8966	-1.90277	-4.24098
1053.6	437.347	195.829	45.2796	12.9632	-1.8895	-4.24811
1053.8	437.399	196.298	45.4561	13.03	-1.87595	-4.25503
1054.1	437.449	196.766	45.6327	13.0971	-1.86214	-4.26173
1054.3	437.498	197.234	45.8094	13.1643	-1.84805	-4.26821
[truncated: 4,500 more rows]

## Sheet: Sheet3
0.0015837	0.317876	0.121502	-0.0512014	-0.00424224	0.000195614	-0.000168924
0.0225	0.318341	0.122056	-0.0512325	-0.00387119	0.00019593	-0.000169661
0.056569	0.318797	0.12261	-0.0512623	-0.00349765	0.000196247	-0.000170401
0.11207	0.319246	0.123163	-0.0512905	-0.00312162	0.000196564	-0.000171143
0.20246	0.319686	0.123714	-0.0513174	-0.00274307	0.000196882	-0.000171887
0.34971	0.320119	0.124265	-0.0513427	-0.00236201	0.0001972	-0.000172634
0.58956	0.320545	0.124815	-0.0513666	-0.00197842	0.00019752	-0.000173383
0.98025	0.320962	0.125364	-0.051389	-0.0015923	0.000197839	-0.000174134
1.6166	0.321371	0.125912	-0.0514099	-0.00120363	0.000198159	-0.000174887
2.6039	0.321772	0.126459	-0.0514294	-0.000812405	0.00019848	-0.000175643
3.6705	0.322165	0.127005	-0.0514473	-0.000418611	0.000198801	-0.000176401
4.7371	0.32255	0.12755	-0.0514637	-2.22398e-05	0.000199123	-0.000177162
5.8036	0.322927	0.128094	-0.0514785	0.000376719	0.000199446	-0.000177925
6.8702	0.323295	0.128637	-0.0514918	0.000778276	0.000199769	-0.00017869
7.9368	0.323655	0.129178	-0.0515036	0.00118244	0.000200093	-0.000179458
9.0034	0.324006	0.129719	-0.0515138	0.00158922	0.000200417	-0.000180228
10.07	0.32435	0.130259	-0.0515225	0.00199863	0.000200742	-0.000181
11.137	0.324684	0.130797	-0.0515295	0.00241067	0.000201067	-0.000181775
12.203	0.32501	0.131334	-0.051535	0.00282535	0.000201393	-0.000182552
13.27	0.325328	0.13187	-0.0515389	0.00324268	0.00020172	-0.000183332
14.336	0.325636	0.132405	-0.0515412	0.00366266	0.000202047	-0.000184114
15.403	0.325936	0.132939	-0.0515419	0.00408531	0.000202375	-0.000184898
16.47	0.326228	0.133472	-0.0515409	0.00451062	0.000202703	-0.000185685
17.536	0.32651	0.134003	-0.0515383	0.0049386	0.000203032	-0.000186474
18.603	0.326784	0.134533	-0.0515341	0.00536926	0.000203361	-0.000187265
19.669	0.327048	0.135062	-0.0515283	0.00580261	0.000203691	-0.000188059
20.736	0.327304	0.13559	-0.0515208	0.00623864	0.000204021	-0.000188855
21.802	0.327551	0.136116	-0.0515116	0.00667736	0.000204352	-0.000189654
22.869	0.327789	0.136641	-0.0515008	0.00711878	0.000204683	-0.000190455
23.936	0.328018	0.137165	-0.0514883	0.00756289	0.000205015	-0.000191258
25.002	0.328238	0.137688	-0.0514742	0.00800969	0.000205347	-0.000192064
26.069	0.328449	0.138209	-0.0514584	0.0084592	0.000205679	-0.000192871
27.135	0.32865	0.138729	-0.051441	0.0089114	0.000206012	-0.000193682
28.202	0.328843	0.139248	-0.0514219	0.00936631	0.000206345	-0.000194494
29.269	0.329027	0.139766	-0.0514011	0.00982394	0.000206679	-0.000195309
30.335	0.329201	0.140282	-0.0513786	0.0102843	0.000207013	-0.000196127
31.402	0.329367	0.140797	-0.0513544	0.0107473	0.000207347	-0.000196946
32.468	0.329523	0.14131	-0.0513284	0.0112131	0.000207681	-0.000197768
33.535	0.329669	0.141822	-0.0513008	0.0116816	0.000208016	-0.000198593
34.602	0.329807	0.142333	-0.0512715	0.0121528	0.000208351	-0.000199419
35.668	0.329935	0.142842	-0.0512404	0.0126267	0.000208686	-0.000200248
36.735	0.330053	0.14335	-0.0512075	0.0131034	0.000209021	-0.000201079
37.801	0.330162	0.143856	-0.051173	0.0135828	0.000209357	-0.000201912
38.868	0.330261	0.144361	-0.0511367	0.0140649	0.000209693	-0.000202748
39.934	0.330351	0.144864	-0.0510986	0.0145497	0.000210028	-0.000203586
41.001	0.330431	0.145366	-0.0510587	0.0150373	0.000210364	-0.000204426
42.068	0.330502	0.145866	-0.0510171	0.0155275	0.0002107	-0.000205268
43.134	0.330563	0.146365	-0.0509737	0.0160205	0.000211036	-0.000206113
44.201	0.330614	0.146862	-0.0509285	0.0165162	0.000211372	-0.00020696
45.267	0.330655	0.147358	-0.0508816	0.0170147	0.000211708	-0.000207809
46.334	0.330687	0.147852	-0.0508328	0.0175158	0.000212043	-0.00020866
47.401	0.330708	0.148344	-0.0507822	0.0180197	0.000212379	-0.000209513
48.467	0.33072	0.148835	-0.0507298	0.0185262	0.000212715	-0.000210368
49.534	0.330722	0.149324	-0.0506757	0.0190355	0.00021305	-0.000211226
50.6	0.330714	0.149811	-0.0506197	0.0195475	0.000213385	-0.000212085
51.667	0.330697	0.150297	-0.0505619	0.0200622	0.00021372	-0.000212947
52.734	0.330669	0.150781	-0.0505024	0.0205796	0.000214055	-0.000213811
53.8	0.330632	0.151264	-0.050441	0.0210997	0.000214389	-0.000214677
54.867	0.330584	0.151745	-0.0503778	0.0216225	0.000214723	-0.000215545
55.933	0.330527	0.152224	-0.0503128	0.022148	0.000215056	-0.000216415
57	0.33046	0.152702	-0.0502459	0.0226762	0.000215389	-0.000217287
58.066	0.330383	0.153178	-0.0501773	0.0232071	0.000215722	-0.000218161
59.133	0.330296	0.153652	-0.0501068	0.0237407	0.000216054	-0.000219037
60.2	0.330199	0.154124	-0.0500345	0.024277	0.000216386	-0.000219915
61.266	0.330092	0.154595	-0.0499603	0.024816	0.000216717	-0.000220795
62.333	0.329975	0.155065	-0.0498843	0.0253577	0.000217048	-0.000221678
63.399	0.329849	0.155532	-0.0498066	0.0259021	0.000217378	-0.000222562
64.466	0.329712	0.155998	-0.0497269	0.0264492	0.000217707	-0.000223448
65.533	0.329565	0.156462	-0.0496455	0.0269989	0.000218036	-0.000224336
66.599	0.329409	0.156925	-0.0495622	0.0275512	0.000218363	-0.000225226
67.666	0.329242	0.157385	-0.0494771	0.0281063	0.00021869	-0.000226118
68.732	0.329066	0.157844	-0.0493902	0.0286639	0.000219016	-0.000227011
69.799	0.328879	0.158302	-0.0493015	0.0292242	0.000219341	-0.000227907
70.866	0.328683	0.158757	-0.0492109	0.0297871	0.000219665	-0.000228804
71.932	0.328477	0.159211	-0.0491185	0.0303527	0.000219988	-0.000229703
72.999	0.328261	0.159663	-0.0490243	0.0309208	0.00022031	-0.000230604
74.065	0.328035	0.160114	-0.0489283	0.0314916	0.00022063	-0.000231507
75.132	0.327799	0.160562	-0.0488305	0.0320649	0.00022095	-0.000232411
76.198	0.327554	0.161009	-0.0487309	0.0326408	0.000221268	-0.000233317
77.265	0.327299	0.161455	-0.0486295	0.0332192	0.000221585	-0.000234225
78.332	0.327034	0.161899	-0.0485263	0.0338003	0.0002219	-0.000235134
79.398	0.32676	0.162341	-0.0484213	0.0343838	0.000222214	-0.000236045
80.465	0.326476	0.162781	-0.0483145	0.03497	0.000222526	-0.000236958
81.531	0.326182	0.16322	-0.048206	0.0355586	0.000222837	-0.000237872
82.598	0.325878	0.163657	-0.0480956	0.0361498	0.000223146	-0.000238788
83.665	0.325565	0.164092	-0.0479834	0.0367435	0.000223454	-0.000239705
84.731	0.325242	0.164525	-0.0478695	0.0373397	0.000223759	-0.000240624
85.798	0.324909	0.164957	-0.0477537	0.0379384	0.000224063	-0.000241545
86.864	0.324567	0.165387	-0.0476361	0.0385397	0.000224366	-0.000242467
87.931	0.324214	0.165815	-0.0475167	0.0391434	0.000224666	-0.00024339
88.998	0.323852	0.166242	-0.0473955	0.0397496	0.000224964	-0.000244315
90.064	0.323481	0.166666	-0.0472726	0.0403583	0.000225261	-0.000245241
91.131	0.323099	0.167089	-0.0471477	0.0409695	0.000225555	-0.000246169
92.197	0.322707	0.16751	-0.0470211	0.0415831	0.000225848	-0.000247098
93.264	0.322306	0.167929	-0.0468927	0.0421992	0.000226138	-0.000248028
94.33	0.321895	0.168347	-0.0467624	0.0428177	0.000226426	-0.00024896
95.397	0.321473	0.168762	-0.0466302	0.0434387	0.000226712	-0.000249893
96.464	0.321042	0.169175	-0.0464963	0.0440621	0.000226995	-0.000250827
97.53	0.320601	0.169587	-0.0463605	0.0446879	0.000227277	-0.000251762
98.597	0.32015	0.169997	-0.0462229	0.0453162	0.000227555	-0.000252699
99.663	0.319689	0.170404	-0.0460834	0.0459468	0.000227832	-0.000253637
100.73	0.319218	0.17081	-0.0459421	0.0465799	0.000228105	-0.000254576
101.8	0.318737	0.171214	-0.0457989	0.0472154	0.000228377	-0.000255517
102.86	0.318246	0.171616	-0.045654	0.0478532	0.000228645	-0.000256458
103.93	0.317745	0.172016	-0.0455072	0.0484935	0.000228911	-0.000257401
105	0.317234	0.172414	-0.0453585	0.0491361	0.000229175	-0.000258344
106.06	0.316713	0.17281	-0.045208	0.049781	0.000229435	-0.000259289
107.13	0.316182	0.173204	-0.0450556	0.0504284	0.000229693	-0.000260235
108.2	0.315641	0.173595	-0.0449014	0.0510781	0.000229948	-0.000261182
109.26	0.31509	0.173985	-0.0447452	0.0517302	0.0002302	-0.00026213
110.33	0.314529	0.174373	-0.0445873	0.0523846	0.000230449	-0.000263078
111.4	0.313957	0.174759	-0.0444274	0.0530414	0.000230695	-0.000264028
112.46	0.313375	0.175142	-0.0442657	0.0537005	0.000230938	-0.000264979
113.53	0.312783	0.175524	-0.044102	0.0543619	0.000231177	-0.000265931
114.6	0.312181	0.175903	-0.0439365	0.0550257	0.000231414	-0.000266883
115.66	0.311569	0.17628	-0.0437692	0.0556917	0.000231648	-0.000267837
116.73	0.310946	0.176655	-0.0435999	0.0563601	0.000231878	-0.000268791
117.8	0.310314	0.177028	-0.0434288	0.0570307	0.000232104	-0.000269746
118.86	0.309671	0.177399	-0.0432557	0.0577036	0.000232327	-0.000270702
119.93	0.309017	0.177767	-0.0430808	0.0583787	0.000232547	-0.000271659
121	0.308354	0.178134	-0.042904	0.059056	0.000232763	-0.000272616
122.06	0.30768	0.178498	-0.0427254	0.0597356	0.000232975	-0.000273574
123.13	0.306997	0.17886	-0.0425448	0.0604174	0.000233184	-0.000274532
124.19	0.306303	0.179219	-0.0423624	0.0611013	0.000233388	-0.000275491
125.26	0.305599	0.179577	-0.0421782	0.0617874	0.000233589	-0.000276451
126.33	0.304885	0.179932	-0.041992	0.0624756	0.000233786	-0.000277411
127.37	0.304161	0.180285	-0.0418041	0.063166	0.000233978	-0.000278372
128.41	0.303427	0.180636	-0.0416143	0.0638584	0.000234166	-0.000279333
129.45	0.302683	0.180984	-0.0414226	0.064553	0.00023435	-0.000280294
130.47	0.30193	0.181331	-0.0412292	0.0652495	0.000234529	-0.000281256
131.51	0.301166	0.181675	-0.0410338	0.0659482	0.000234704	-0.000282217
132.58	0.300392	0.182016	-0.0408367	0.0666488	0.000234875	-0.00028318
133.65	0.299609	0.182356	-0.0406377	0.0673515	0.00023504	-0.000284142
134.71	0.298815	0.182693	-0.0404368	0.0680561	0.000235201	-0.000285105
135.78	0.298012	0.183028	-0.0402341	0.0687628	0.000235358	-0.000286067
136.85	0.297198	0.18336	-0.0400296	0.0694714	0.000235509	-0.00028703
137.91	0.296374	0.18369	-0.0398232	0.070182	0.000235655	-0.000287993
138.98	0.295541	0.184018	-0.039615	0.0708946	0.000235797	-0.000288956
140.05	0.294697	0.184343	-0.0394049	0.071609	0.000235933	-0.000289919
141.11	0.293844	0.184666	-0.039193	0.0723253	0.000236064	-0.000290882
142.18	0.292981	0.184986	-0.0389793	0.0730435	0.000236189	-0.000291845
143.25	0.292107	0.185304	-0.0387637	0.0737636	0.000236309	-0.000292808
144.31	0.291224	0.18562	-0.0385463	0.0744854	0.000236424	-0.00029377
145.38	0.290331	0.185933	-0.038327	0.0752091	0.000236533	-0.000294732
146.43	0.289428	0.186243	-0.0381059	0.0759346	0.000236636	-0.000295694
147.5	0.288515	0.186551	-0.037883	0.0766618	0.000236734	-0.000296656
148.56	0.287592	0.186857	-0.0376583	0.0773909	0.000236825	-0.000297617
149.62	0.286659	0.18716	-0.0374317	0.0781216	0.000236911	-0.000298578
150.67	0.285717	0.18746	-0.0372033	0.0788541	0.000236991	-0.000299538
151.72	0.284764	0.187758	-0.0369731	0.0795882	0.000237064	-0.000300498
152.77	0.283802	0.188053	-0.0367411	0.0803241	0.000237132	-0.000301457
153.81	0.28283	0.188346	-0.0365073	0.0810616	0.000237193	-0.000302416
154.77	0.281849	0.188636	-0.0362717	0.0818007	0.000237247	-0.000303374
155.64	0.280858	0.188924	-0.0360343	0.0825415	0.000237295	-0.000304332
156.46	0.279856	0.189209	-0.035795	0.0832839	0.000237337	-0.000305289
157.28	0.278846	0.189491	-0.035554	0.0840279	0.000237371	-0.000306245
158.1	0.277825	0.189771	-0.0353112	0.0847735	0.0002374	-0.0003072
158.92	0.276795	0.190048	-0.0350665	0.0855207	0.000237421	-0.000308155
159.74	0.275755	0.190323	-0.0348201	0.0862694	0.000237435	-0.000309109
160.55	0.274705	0.190595	-0.0345718	0.0870197	0.000237443	-0.000310062
161.37	0.273645	0.190864	-0.0343218	0.0877715	0.000237444	-0.000311014
162.19	0.272576	0.191131	-0.0340699	0.0885249	0.000237437	-0.000311965
162.99	0.271498	0.191395	-0.0338163	0.0892798	0.000237424	-0.000312916
163.75	0.270409	0.191656	-0.0335608	0.0900361	0.000237403	-0.000313865
164.54	0.269311	0.191915	-0.0333036	0.0907939	0.000237374	-0.000314813
165.33	0.268204	0.192171	-0.0330446	0.0915531	0.000237338	-0.00031576
166.13	0.267087	0.192425	-0.0327839	0.0923138	0.000237295	-0.000316706
166.91	0.26596	0.192675	-0.0325214	0.0930758	0.000237244	-0.000317651
167.69	0.264824	0.192923	-0.0322571	0.0938392	0.000237185	-0.000318595
168.47	0.263679	0.193169	-0.0319911	0.094604	0.000237119	-0.000319537
169.26	0.262524	0.193411	-0.0317233	0.0953702	0.000237044	-0.000320478
170.05	0.26136	0.193652	-0.0314538	0.0961376	0.000236961	-0.000321418
170.84	0.260187	0.193889	-0.0311825	0.0969064	0.000236871	-0.000322357
171.63	0.259005	0.194124	-0.0309095	0.0976765	0.000236772	-0.000323294
172.42	0.257813	0.194356	-0.0306348	0.0984478	0.000236665	-0.000324229
173.2	0.256613	0.194585	-0.0303584	0.0992204	0.000236549	-0.000325163
173.98	0.255403	0.194812	-0.0300803	0.0999942	0.000236425	-0.000326096
174.76	0.254184	0.195037	-0.0298005	0.100769	0.000236292	-0.000327027
175.54	0.252956	0.195258	-0.0295191	0.101545	0.000236151	-0.000327957
176.31	0.25172	0.195477	-0.0292359	0.102323	0.000236001	-0.000328884
177.09	0.250474	0.195694	-0.028951	0.103101	0.000235842	-0.000329811
177.86	0.249219	0.195907	-0.0286644	0.103881	0.000235674	-0.000330735
178.63	0.247956	0.196118	-0.0283762	0.104662	0.000235497	-0.000331658
179.38	0.246683	0.196326	-0.0280862	0.105444	0.000235311	-0.000332579
180.13	0.245402	0.196532	-0.0277946	0.106227	0.000235116	-0.000333498
180.89	0.244111	0.196735	-0.0275013	0.107011	0.000234912	-0.000334415
181.64	0.242812	0.196935	-0.0272063	0.107796	0.000234698	-0.00033533
182.4	0.241504	0.197133	-0.0269097	0.108582	0.000234475	-0.000336243
183.16	0.240187	0.197327	-0.0266114	0.10937	0.000234243	-0.000337155
183.9	0.238861	0.197519	-0.0263114	0.110158	0.000234	-0.000338064
184.63	0.237526	0.197709	-0.0260097	0.110947	0.000233748	-0.000338971
185.36	0.236183	0.197895	-0.0257064	0.111737	0.000233486	-0.000339876
186.09	0.23483	0.198079	-0.0254014	0.112528	0.000233215	-0.000340779
186.82	0.233469	0.19826	-0.0250948	0.113321	0.000232933	-0.00034168
187.55	0.2321	0.198438	-0.0247865	0.114113	0.000232641	-0.000342578
188.29	0.230721	0.198613	-0.0244765	0.114907	0.000232339	-0.000343475
189.03	0.229334	0.198786	-0.0241649	0.115702	0.000232027	-0.000344368
189.78	0.227938	0.198956	-0.0238516	0.116498	0.000231704	-0.00034526
190.52	0.226533	0.199123	-0.0235367	0.117294	0.000231371	-0.000346149
191.25	0.22512	0.199287	-0.0232202	0.118092	0.000231027	-0.000347036
191.99	0.223698	0.199448	-0.022902	0.11889	0.000230673	-0.00034792
192.73	0.222268	0.199607	-0.0225822	0.119689	0.000230308	-0.000348802
193.46	0.220829	0.199763	-0.0222607	0.120489	0.000229933	-0.000349681
194.19	0.219381	0.199916	-0.0219376	0.121289	0.000229547	-0.000350558
194.92	0.217925	0.200066	-0.0216129	0.122091	0.000229149	-0.000351432
195.65	0.21646	0.200213	-0.0212866	0.122893	0.000228741	-0.000352304
196.38	0.214987	0.200358	-0.0209586	0.123696	0.000228322	-0.000353173
197.1	0.213505	0.2005	-0.0206289	0.124499	0.000227892	-0.000354039
197.83	0.212014	0.200638	-0.0202977	0.125304	0.00022745	-0.000354902
198.55	0.210515	0.200774	-0.0199648	0.126109	0.000226998	-0.000355763
199.27	0.209008	0.200908	-0.0196303	0.126915	0.000226533	-0.000356621
199.98	0.207492	0.201038	-0.0192942	0.127721	0.000226058	-0.000357476
200.67	0.205967	0.201165	-0.0189565	0.128528	0.00022557	-0.000358329
201.37	0.204435	0.20129	-0.0186171	0.129336	0.000225071	-0.000359178
202.09	0.202894	0.201411	-0.0182762	0.130144	0.000224561	-0.000360024
202.8	0.201345	0.20153	-0.0179337	0.130953	0.000224038	-0.000360867
203.52	0.199787	0.201646	-0.0175897	0.131762	0.000223503	-0.000361707
204.23	0.198222	0.201759	-0.017244	0.132572	0.000222956	-0.000362544
204.94	0.196648	0.201869	-0.0168968	0.133382	0.000222396	-0.000363378
205.65	0.195066	0.201977	-0.016548	0.134193	0.000221824	-0.000364208
206.35	0.193476	0.202081	-0.0161977	0.135005	0.00022124	-0.000365036
207.03	0.191879	0.202183	-0.0158459	0.135816	0.000220643	-0.000365859
207.71	0.190274	0.202281	-0.0154926	0.136628	0.000220033	-0.00036668
208.39	0.188661	0.202377	-0.0151378	0.137441	0.00021941	-0.000367496
209.08	0.18704	0.20247	-0.0147814	0.138253	0.000218774	-0.00036831
209.77	0.185412	0.202561	-0.0144236	0.139066	0.000218125	-0.000369119
210.47	0.183776	0.202648	-0.0140644	0.139879	0.000217463	-0.000369925
211.17	0.182133	0.202733	-0.0137036	0.140693	0.000216787	-0.000370727
211.87	0.180482	0.202814	-0.0133415	0.141506	0.000216098	-0.000371526
212.56	0.178824	0.202893	-0.0129778	0.14232	0.000215394	-0.00037232
213.25	0.177158	0.202969	-0.0126127	0.143134	0.000214677	-0.000373111
213.93	0.175486	0.203043	-0.0122462	0.143948	0.000213947	-0.000373898
214.61	0.173806	0.203113	-0.0118783	0.144762	0.000213202	-0.00037468
215.29	0.172119	0.20318	-0.011509	0.145576	0.000212442	-0.000375459
215.96	0.170425	0.203245	-0.0111382	0.14639	0.000211669	-0.000376233
216.63	0.168724	0.203307	-0.0107661	0.147204	0.00021088	-0.000377003
217.3	0.167016	0.203365	-0.0103926	0.148018	0.000210077	-0.000377769
217.98	0.165301	0.203421	-0.0100178	0.148832	0.00020926	-0.00037853
218.67	0.163579	0.203475	-0.00964164	0.149646	0.000208427	-0.000379287
219.36	0.161851	0.203525	-0.00926414	0.150459	0.000207579	-0.000380039
220.05	0.160117	0.203572	-0.00888532	0.151272	0.000206715	-0.000380787
220.74	0.158375	0.203617	-0.0085052	0.152085	0.000205836	-0.00038153
221.42	0.156628	0.203658	-0.00812378	0.152898	0.000204942	-0.000382268
222.11	0.154874	0.203697	-0.00774108	0.15371	0.000204032	-0.000383001
222.79	0.153113	0.203733	-0.00735711	0.154522	0.000203105	-0.00038373
223.47	0.151347	0.203766	-0.00697189	0.155333	0.000202163	-0.000384453
224.14	0.149574	0.203796	-0.00658543	0.156144	0.000201205	-0.000385172
224.8	0.147796	0.203823	-0.00619774	0.156955	0.00020023	-0.000385885
225.47	0.146011	0.203848	-0.00580883	0.157765	0.000199239	-0.000386594
226.13	0.144221	0.203869	-0.00541871	0.158574	0.000198232	-0.000387297
226.79	0.142425	0.203888	-0.0050274	0.159383	0.000197207	-0.000387995
227.45	0.140623	0.203904	-0.0046349	0.160192	0.000196166	-0.000388688
228.08	0.138815	0.203917	-0.00424122	0.160999	0.000195108	-0.000389375
228.72	0.137001	0.203928	-0.00384637	0.161806	0.000194033	-0.000390057
229.35	0.135183	0.203935	-0.00345036	0.162613	0.000192941	-0.000390733
229.98	0.133358	0.20394	-0.00305319	0.163418	0.000191831	-0.000391404
230.61	0.131528	0.203942	-0.00265488	0.164223	0.000190704	-0.000392069
231.24	0.129693	0.203941	-0.00225545	0.165028	0.00018956	-0.000392729
231.87	0.127852	0.203937	-0.00185492	0.165831	0.000188397	-0.000393383
232.49	0.126007	0.203931	-0.00145329	0.166634	0.000187217	-0.000394031
233.12	0.124156	0.203922	-0.00105058	0.167435	0.000186019	-0.000394673
233.75	0.1223	0.20391	-0.000646822	0.168236	0.000184802	-0.00039531
234.39	0.12044	0.203895	-0.000242021	0.169036	0.000183567	-0.00039594
235.02	0.118575	0.203877	0.000163801	0.169835	0.000182314	-0.000396564
235.66	0.116705	0.203857	0.000570629	0.170633	0.000181042	-0.000397182
236.3	0.114831	0.203834	0.000978451	0.171429	0.000179751	-0.000397794
236.95	0.112952	0.203809	0.00138725	0.172225	0.000178441	-0.0003984
237.6	0.111069	0.20378	0.00179702	0.173019	0.000177111	-0.000398999
238.23	0.109181	0.203749	0.00220772	0.173812	0.000175763	-0.000399592
238.86	0.10729	0.203715	0.00261935	0.174604	0.000174395	-0.000400178
239.49	0.105395	0.203679	0.00303188	0.175395	0.000173007	-0.000400757
240.13	0.103496	0.20364	0.00344529	0.176184	0.000171599	-0.00040133
240.76	0.101593	0.203598	0.00385959	0.176972	0.000170172	-0.000401896
241.39	0.0996861	0.203554	0.00427474	0.177759	0.000168724	-0.000402456
242.02	0.0977759	0.203507	0.00469074	0.178544	0.000167256	-0.000403008
242.65	0.0958621	0.203457	0.00510757	0.179328	0.000165768	-0.000403554
243.27	0.0939449	0.203405	0.00552522	0.18011	0.000164259	-0.000404092
243.88	0.0920243	0.20335	0.00594369	0.180891	0.000162729	-0.000404624
244.5	0.0901004	0.203293	0.00636297	0.18167	0.000161179	-0.000405148
245.1	0.0881731	0.203233	0.00678304	0.182447	0.000159607	-0.000405665
245.71	0.0862426	0.20317	0.0072039	0.183223	0.000158015	-0.000406175
246.31	0.0843091	0.203104	0.00762553	0.183997	0.000156401	-0.000406677
246.9	0.0823724	0.203036	0.00804792	0.18477	0.000154766	-0.000407172
247.5	0.0804329	0.202966	0.00847105	0.185541	0.000153109	-0.00040766
248.1	0.0784903	0.202892	0.00889492	0.18631	0.00015143	-0.00040814
248.69	0.076545	0.202816	0.00931952	0.187077	0.00014973	-0.000408612
249.29	0.0745968	0.202738	0.00974484	0.187842	0.000148007	-0.000409077
249.88	0.0726459	0.202656	0.0101709	0.188606	0.000146263	-0.000409534
250.48	0.0706924	0.202572	0.0105976	0.189367	0.000144496	-0.000409983
251.08	0.0687361	0.202486	0.011025	0.190127	0.000142706	-0.000410424
251.68	0.0667773	0.202396	0.0114531	0.190884	0.000140894	-0.000410857
252.28	0.064816	0.202304	0.0118819	0.19164	0.000139059	-0.000411282
252.89	0.0628522	0.202209	0.0123113	0.192394	0.000137201	-0.000411699
253.5	0.0608859	0.202112	0.0127414	0.193145	0.000135321	-0.000412108
254.11	0.0589174	0.202012	0.0131722	0.193895	0.000133417	-0.000412509
254.74	0.0569465	0.201909	0.0136035	0.194642	0.00013149	-0.000412901
255.36	0.0549734	0.201803	0.0140356	0.195387	0.000129539	-0.000413285
255.98	0.0529979	0.201695	0.0144682	0.19613	0.000127565	-0.000413661
256.6	0.0510203	0.201584	0.0149015	0.196871	0.000125568	-0.000414028
257.22	0.0490404	0.20147	0.0153354	0.197609	0.000123546	-0.000414387
257.83	0.0470583	0.201354	0.01577	0.198346	0.000121501	-0.000414737
258.45	0.0450739	0.201234	0.0162051	0.19908	0.000119432	-0.000415079
259.07	0.0430874	0.201112	0.0166409	0.199812	0.000117339	-0.000415412
259.68	0.0410986	0.200987	0.0170774	0.200541	0.000115222	-0.000415737
260.29	0.0391077	0.20086	0.0175144	0.201268	0.00011308	-0.000416052
260.91	0.0371147	0.200729	0.0179521	0.201993	0.000110914	-0.000416359
261.52	0.0351196	0.200596	0.0183903	0.202716	0.000108724	-0.000416657
262.13	0.0331225	0.20046	0.0188292	0.203436	0.000106508	-0.000416947
262.74	0.0311234	0.200321	0.0192686	0.204153	0.000104268	-0.000417227
263.35	0.0291224	0.200179	0.0197086	0.204868	0.000102003	-0.000417498
263.95	0.0271196	0.200034	0.0201492	0.205581	9.97131e-05	-0.00041776
264.56	0.025115	0.199886	0.0205904	0.206291	9.73976e-05	-0.000418013
265.17	0.0231086	0.199736	0.0210321	0.206999	9.50566e-05	-0.000418256
265.77	0.0211005	0.199583	0.0214743	0.207703	9.26899e-05	-0.00041849
266.38	0.0190908	0.199426	0.0219171	0.208406	9.02976e-05	-0.000418715
266.98	0.0170795	0.199267	0.0223604	0.209105	8.78793e-05	-0.00041893
267.58	0.0150668	0.199105	0.0228042	0.209802	8.5435e-05	-0.000419135
268.18	0.0130526	0.19894	0.0232485	0.210496	8.29644e-05	-0.000419331
268.79	0.0110372	0.198772	0.0236933	0.211187	8.04674e-05	-0.000419518
269.39	0.00902045	0.198601	0.0241386	0.211875	7.79438e-05	-0.000419694
269.98	0.00700254	0.198427	0.0245843	0.21256	7.53935e-05	-0.000419861
270.58	0.00498345	0.198251	0.0250305	0.213243	7.28164e-05	-0.000420017
271.18	0.00296323	0.198071	0.0254771	0.213922	7.02122e-05	-0.000420164
271.77	0.000941885	0.197889	0.0259242	0.214599	6.75809e-05	-0.0004203
272.36	-0.00108057	0.197703	0.0263717	0.215272	6.49223e-05	-0.000420426
272.94	-0.00310415	0.197514	0.0268197	0.215943	6.22364e-05	-0.000420543
273.52	-0.00512888	0.197323	0.0272682	0.21661	5.95229e-05	-0.000420649
274.1	-0.00715474	0.197128	0.0277171	0.217275	5.67819e-05	-0.000420744
274.68	-0.00918167	0.19693	0.0281664	0.217936	5.40131e-05	-0.000420829
275.26	-0.0112096	0.196729	0.0286162	0.218594	5.12163e-05	-0.000420904
275.84	-0.0132385	0.196525	0.0290664	0.219249	4.83914e-05	-0.000420968
276.43	-0.0152684	0.196318	0.029517	0.2199	4.55383e-05	-0.000421022
277.02	-0.0172992	0.196108	0.029968	0.220549	4.26567e-05	-0.000421065
277.6	-0.019331	0.195894	0.0304195	0.221194	3.97467e-05	-0.000421097
278.17	-0.0213636	0.195678	0.0308714	0.221836	3.68079e-05	-0.000421119
278.73	-0.0233971	0.195458	0.0313236	0.222474	3.38402e-05	-0.000421129
279.3	-0.0254314	0.195235	0.0317763	0.223109	3.08436e-05	-0.000421129
279.86	-0.0274665	0.195008	0.0322294	0.223741	2.78179e-05	-0.000421117
280.41	-0.0295025	0.194779	0.0326828	0.224369	2.47629e-05	-0.000421095
280.97	-0.0315392	0.194546	0.0331367	0.224993	2.16785e-05	-0.000421061
281.52	-0.0335766	0.194309	0.033591	0.225614	1.85646e-05	-0.000421016
282.08	-0.0356147	0.19407	0.0340456	0.226232	1.54209e-05	-0.00042096
282.65	-0.0376533	0.193827	0.0345005	0.226846	1.22473e-05	-0.000420892
283.22	-0.0396925	0.193581	0.0349559	0.227456	9.04379e-06	-0.000420813
283.79	-0.0417322	0.193331	0.0354115	0.228063	5.81009e-06	-0.000420722
284.35	-0.0437724	0.193078	0.0358676	0.228666	2.54611e-06	-0.00042062
284.92	-0.0458131	0.192822	0.0363239	0.229265	-7.48269e-07	-0.000420506
285.48	-0.0478543	0.192562	0.0367806	0.229861	-4.07319e-06	-0.000420381
286.05	-0.0498959	0.192299	0.0372377	0.230453	-7.42876e-06	-0.000420243
286.61	-0.051938	0.192033	0.0376951	0.231041	-1.08151e-05	-0.000420094
287.18	-0.0539806	0.191763	0.0381528	0.231625	-1.42323e-05	-0.000419934
287.74	-0.0560235	0.19149	0.0386109	0.232205	-1.76805e-05	-0.000419761
288.31	-0.0580669	0.191213	0.0390693	0.232782	-2.11599e-05	-0.000419576
288.88	-0.0601105	0.190932	0.0395281	0.233355	-2.46706e-05	-0.000419379
289.44	-0.0621544	0.190649	0.0399871	0.233923	-2.82128e-05	-0.00041917
290.01	-0.0641986	0.190361	0.0404464	0.234488	-3.17867e-05	-0.000418949
290.59	-0.0662429	0.190071	0.0409061	0.235049	-3.53923e-05	-0.000418716
291.16	-0.0682873	0.189776	0.041366	0.235606	-3.90298e-05	-0.00041847
291.73	-0.0703318	0.189479	0.0418262	0.236158	-4.26994e-05	-0.000418212
292.31	-0.0723763	0.189177	0.0422867	0.236707	-4.64014e-05	-0.000417941
292.89	-0.0744207	0.188872	0.0427474	0.237252	-5.01357e-05	-0.000417658
293.47	-0.0764651	0.188564	0.0432084	0.237792	-5.39026e-05	-0.000417362
294.05	-0.0785093	0.188252	0.0436696	0.238328	-5.77022e-05	-0.000417054
294.62	-0.0805532	0.187937	0.0441311	0.23886	-6.15347e-05	-0.000416733
295.18	-0.0825969	0.187618	0.0445928	0.239387	-6.54002e-05	-0.000416399
295.74	-0.0846401	0.187295	0.0450547	0.239911	-6.92989e-05	-0.000416052
296.3	-0.0866829	0.186969	0.0455167	0.24043	-7.3231e-05	-0.000415691
296.85	-0.088725	0.186639	0.045979	0.240944	-7.71967e-05	-0.000415318
297.4	-0.0907666	0.186306	0.0464414	0.241454	-8.1196e-05	-0.000414932
297.95	-0.0928076	0.185969	0.046904	0.24196	-8.52292e-05	-0.000414533
298.49	-0.094848	0.185629	0.0473668	0.242461	-8.92963e-05	-0.00041412
299.03	-0.0968876	0.185285	0.0478298	0.242957	-9.33975e-05	-0.000413694
299.57	-0.0989266	0.184938	0.0482929	0.24345	-9.7533e-05	-0.000413254
300.11	-0.100965	0.184586	0.0487561	0.243937	-0.000101703	-0.000412801
300.65	-0.103003	0.184231	0.0492196	0.24442	-0.000105907	-0.000412335
301.21	-0.10504	0.183873	0.0496832	0.244898	-0.000110146	-0.000411855
301.78	-0.107076	0.183511	0.0501469	0.245372	-0.000114419	-0.000411361
302.36	-0.109112	0.183145	0.0506109	0.245841	-0.000118728	-0.000410854
302.93	-0.111147	0.182775	0.051075	0.246306	-0.000123071	-0.000410333
303.53	-0.113181	0.182401	0.0515392	0.246765	-0.00012745	-0.000409798
304.11	-0.115215	0.182024	0.0520036	0.24722	-0.000131864	-0.000409249
304.69	-0.117248	0.181643	0.0524682	0.24767	-0.000136313	-0.000408687
305.27	-0.11928	0.181257	0.0529329	0.248116	-0.000140798	-0.00040811
305.84	-0.121312	0.180868	0.0533979	0.248556	-0.000145318	-0.000407519
306.4	-0.123343	0.180476	0.053863	0.248992	-0.000149875	-0.000406914
306.96	-0.125374	0.180079	0.0543282	0.249423	-0.000154467	-0.000406295
307.52	-0.127404	0.179678	0.0547937	0.249849	-0.000159095	-0.000405662
308.08	-0.129433	0.179273	0.0552593	0.25027	-0.000163759	-0.000405014
308.64	-0.131462	0.178864	0.0557251	0.250686	-0.00016846	-0.000404352
309.19	-0.13349	0.178451	0.056191	0.251097	-0.000173197	-0.000403676
309.75	-0.135517	0.178034	0.0566571	0.251503	-0.00017797	-0.000402985
310.31	-0.137544	0.177613	0.0571234	0.251904	-0.000182781	-0.000402279
310.88	-0.13957	0.177188	0.0575898	0.252301	-0.000187628	-0.000401559
311.44	-0.141595	0.176759	0.0580564	0.252692	-0.000192512	-0.000400824
312.02	-0.14362	0.176325	0.0585232	0.253078	-0.000197433	-0.000400075
312.6	-0.145644	0.175888	0.0589901	0.253459	-0.000202391	-0.000399311
313.17	-0.147667	0.175446	0.0594572	0.253834	-0.000207386	-0.000398532
313.75	-0.14969	0.175	0.0599245	0.254205	-0.000212419	-0.000397738
314.33	-0.151713	0.17455	0.060392	0.254571	-0.00021749	-0.000396929
314.9	-0.153735	0.174096	0.0608597	0.254931	-0.000222597	-0.000396106
315.48	-0.155756	0.173637	0.0613276	0.255286	-0.000227743	-0.000395267
316.05	-0.157777	0.173174	0.0617957	0.255636	-0.000232926	-0.000394413
316.62	-0.159797	0.172706	0.0622639	0.255981	-0.000238148	-0.000393544
317.18	-0.161817	0.172235	0.0627324	0.25632	-0.000243407	-0.00039266
317.74	-0.163836	0.171759	0.063201	0.256654	-0.000248705	-0.000391761
318.29	-0.165854	0.171278	0.0636697	0.256983	-0.000254042	-0.000390846
318.83	-0.167872	0.170793	0.0641387	0.257307	-0.000259417	-0.000389915
319.38	-0.16989	0.170304	0.0646078	0.257625	-0.000264831	-0.00038897
319.92	-0.171906	0.16981	0.0650771	0.257937	-0.000270284	-0.000388008
320.46	-0.173922	0.169312	0.0655465	0.258244	-0.000275776	-0.000387031
321	-0.175937	0.168809	0.0660161	0.258546	-0.000281307	-0.000386038
321.54	-0.177951	0.168302	0.0664858	0.258842	-0.000286878	-0.00038503
322.08	-0.179964	0.16779	0.0669556	0.259132	-0.000292488	-0.000384005
322.61	-0.181976	0.167274	0.0674255	0.259416	-0.000298138	-0.000382964
323.15	-0.183986	0.166753	0.0678955	0.259695	-0.000303829	-0.000381907
323.68	-0.185996	0.166228	0.0683655	0.259969	-0.000309559	-0.000380834
324.21	-0.188004	0.165698	0.0688357	0.260236	-0.000315331	-0.000379745
324.74	-0.190011	0.165164	0.0693058	0.260497	-0.000321142	-0.000378639
325.27	-0.192016	0.164625	0.069776	0.260753	-0.000326995	-0.000377517
325.8	-0.19402	0.164081	0.0702463	0.261003	-0.000332889	-0.000376378
326.33	-0.196022	0.163533	0.0707166	0.261246	-0.000338823	-0.000375223
326.86	-0.198023	0.162981	0.0711869	0.261484	-0.0003448	-0.000374051
327.39	-0.200023	0.162424	0.0716572	0.261716	-0.000350817	-0.000372862
327.93	-0.20202	0.161862	0.0721276	0.261942	-0.000356876	-0.000371656
328.46	-0.204017	0.161295	0.072598	0.262161	-0.000362977	-0.000370433
328.98	-0.206011	0.160724	0.0730683	0.262374	-0.00036912	-0.000369193
329.51	-0.208004	0.160148	0.0735387	0.262581	-0.000375306	-0.000367936
330.03	-0.209994	0.159568	0.074009	0.262782	-0.000381534	-0.000366662
330.55	-0.211983	0.158982	0.0744792	0.262977	-0.000387805	-0.00036537
331.08	-0.21397	0.158392	0.0749494	0.263165	-0.000394118	-0.000364061
331.6	-0.215955	0.157797	0.0754196	0.263347	-0.000400475	-0.000362734
332.12	-0.217937	0.157198	0.0758896	0.263522	-0.000406875	-0.000361389
332.65	-0.219917	0.156593	0.0763596	0.26369	-0.000413319	-0.000360027
333.18	-0.221895	0.155984	0.0768294	0.263852	-0.000419806	-0.000358647
333.71	-0.22387	0.15537	0.0772992	0.264008	-0.000426337	-0.000357249
334.25	-0.225843	0.154751	0.0777688	0.264157	-0.000432913	-0.000355832
334.79	-0.227814	0.154128	0.0782382	0.264299	-0.000439532	-0.000354398
335.33	-0.229782	0.153499	0.0787075	0.264434	-0.000446197	-0.000352945
335.86	-0.231746	0.152866	0.0791766	0.264562	-0.000452906	-0.000351474
336.4	-0.233708	0.152228	0.0796455	0.264684	-0.00045966	-0.000349984
336.93	-0.235667	0.151585	0.0801141	0.264798	-0.00046646	-0.000348476
337.46	-0.237623	0.150937	0.0805826	0.264906	-0.000473304	-0.000346949
337.99	-0.239576	0.150284	0.0810508	0.265007	-0.000480195	-0.000345404
338.52	-0.241526	0.149627	0.0815188	0.2651	-0.000487131	-0.000343839
339.05	-0.243472	0.148964	0.0819865	0.265187	-0.000494113	-0.000342256
339.57	-0.245415	0.148297	0.082454	0.265266	-0.000501142	-0.000340653
340.09	-0.247355	0.147625	0.0829212	0.265338	-0.000508216	-0.000339031
340.62	-0.249291	0.146947	0.0833881	0.265403	-0.000515338	-0.000337391
341.14	-0.251224	0.146265	0.0838547	0.26546	-0.000522506	-0.000335731
341.66	-0.253153	0.145578	0.084321	0.26551	-0.000529721	-0.000334051
342.18	-0.255078	0.144886	0.0847869	0.265553	-0.000536983	-0.000332352
342.7	-0.257	0.144189	0.0852525	0.265588	-0.000544293	-0.000330633
343.21	-0.258917	0.143487	0.0857177	0.265616	-0.00055165	-0.000328895
343.73	-0.26083	0.142781	0.0861825	0.265636	-0.000559055	-0.000327136
344.25	-0.262739	0.142069	0.0866468	0.265648	-0.000566509	-0.000325358
344.76	-0.264643	0.141352	0.0871107	0.265653	-0.000574012	-0.000323559
345.28	-0.266543	0.140631	0.087574	0.26565	-0.000581563	-0.00032174
345.8	-0.268437	0.139904	0.0880369	0.265639	-0.000589163	-0.0003199
346.31	-0.270327	0.139173	0.0884993	0.26562	-0.000596812	-0.000318041
346.83	-0.272212	0.138436	0.0889611	0.265593	-0.000604511	-0.00031616
347.36	-0.274092	0.137695	0.0894223	0.265558	-0.00061226	-0.000314259
347.89	-0.275966	0.136949	0.0898829	0.265514	-0.000620059	-0.000312337
348.41	-0.277834	0.136198	0.0903429	0.265463	-0.000627908	-0.000310393
348.94	-0.279697	0.135442	0.0908022	0.265403	-0.000635807	-0.000308429
349.46	-0.281554	0.134682	0.0912608	0.265335	-0.000643758	-0.000306443
349.98	-0.283404	0.133916	0.0917187	0.265258	-0.00065176	-0.000304436
350.51	-0.285249	0.133146	0.0921759	0.265173	-0.000659813	-0.000302408
351.03	-0.287087	0.132371	0.0926323	0.26508	-0.000667917	-0.000300358
351.54	-0.28892	0.13159	0.093088	0.264978	-0.000676074	-0.000298286
352.05	-0.290745	0.130805	0.093543	0.264867	-0.000684282	-0.000296192
352.57	-0.292565	0.130015	0.0939971	0.264748	-0.000692542	-0.000294077
353.08	-0.294378	0.12922	0.0944505	0.264619	-0.000700855	-0.000291939
353.59	-0.296184	0.12842	0.0949031	0.264483	-0.000709221	-0.000289779
354.1	-0.297983	0.127615	0.0953549	0.264337	-0.000717639	-0.000287597
354.61	-0.299776	0.126805	0.0958058	0.264182	-0.000726111	-0.000285393
355.12	-0.301562	0.12599	0.0962559	0.264019	-0.000734635	-0.000283166
355.64	-0.303341	0.125171	0.0967051	0.263846	-0.000743214	-0.000280917
356.16	-0.305113	0.124346	0.0971535	0.263664	-0.000751846	-0.000278645
356.68	-0.306877	0.123516	0.0976009	0.263473	-0.000760532	-0.00027635
357.2	-0.308635	0.122681	0.0980475	0.263274	-0.000769272	-0.000274033
357.71	-0.310386	0.12184	0.0984932	0.263064	-0.000778067	-0.000271692
358.23	-0.312129	0.120995	0.098938	0.262846	-0.000786916	-0.000269329
358.74	-0.313865	0.120145	0.0993819	0.262618	-0.00079582	-0.000266942
359.25	-0.315593	0.119289	0.0998248	0.262381	-0.000804779	-0.000264532
359.77	-0.317315	0.118428	0.100267	0.262135	-0.000813794	-0.000262098
360.28	-0.319028	0.117562	0.100708	0.261879	-0.000822864	-0.000259641
360.78	-0.320734	0.116691	0.101148	0.261613	-0.000831989	-0.000257161
361.28	-0.322432	0.115815	0.101587	0.261338	-0.00084117	-0.000254657
361.78	-0.324123	0.114933	0.102025	0.261054	-0.000850408	-0.000252128
362.27	-0.325806	0.114046	0.102462	0.260759	-0.000859702	-0.000249577
362.76	-0.327481	0.113154	0.102898	0.260455	-0.000869052	-0.000247001
363.26	-0.329148	0.112256	0.103334	0.260142	-0.000878459	-0.000244401
363.75	-0.330808	0.111354	0.103768	0.259818	-0.000887922	-0.000241777
364.24	-0.33246	0.110445	0.104201	0.259485	-0.000897443	-0.000239129
364.74	-0.334104	0.109532	0.104633	0.259142	-0.00090702	-0.000236456
365.23	-0.335741	0.108612	0.105064	0.258789	-0.000916655	-0.00023376
365.73	-0.33737	0.107688	0.105494	0.258427	-0.000926347	-0.000231038
366.23	-0.338991	0.106758	0.105924	0.258054	-0.000936097	-0.000228293
366.74	-0.340604	0.105822	0.106352	0.257671	-0.000945905	-0.000225522
367.25	-0.342209	0.104881	0.106779	0.257278	-0.000955771	-0.000222727
367.77	-0.343806	0.103934	0.107205	0.256876	-0.000965696	-0.000219907
368.28	-0.345394	0.102981	0.10763	0.256463	-0.000975679	-0.000217062
368.8	-0.346975	0.102023	0.108054	0.256039	-0.000985721	-0.000214191
369.31	-0.348547	0.10106	0.108477	0.255606	-0.000995822	-0.000211296
369.83	-0.350111	0.100091	0.108899	0.255162	-0.00100598	-0.000208375
370.34	-0.351666	0.099116	0.109319	0.254707	-0.0010162	-0.000205428
370.85	-0.353212	0.0981355	0.109739	0.254243	-0.00102648	-0.000202456
371.36	-0.354749	0.0971494	0.110157	0.253767	-0.00103682	-0.000199459
371.86	-0.356278	0.0961577	0.110574	0.253281	-0.00104722	-0.000196435
372.36	-0.357797	0.0951604	0.11099	0.252784	-0.00105769	-0.000193385
372.86	-0.359307	0.0941575	0.111405	0.252277	-0.00106821	-0.000190309
373.35	-0.360807	0.0931489	0.111818	0.251758	-0.00107879	-0.000187207
373.85	-0.362298	0.0921347	0.11223	0.251229	-0.00108944	-0.000184078
374.35	-0.363779	0.0911148	0.112641	0.250689	-0.00110015	-0.000180923
374.85	-0.36525	0.0900892	0.11305	0.250137	-0.00111092	-0.000177741
375.35	-0.366711	0.089058	0.113458	0.249575	-0.00112175	-0.000174532
375.85	-0.368163	0.088021	0.113865	0.249001	-0.00113264	-0.000171297
376.35	-0.369604	0.0869782	0.11427	0.248416	-0.0011436	-0.000168034
376.85	-0.371036	0.0859296	0.114674	0.24782	-0.00115462	-0.000164744
377.35	-0.372457	0.0848752	0.115077	0.247212	-0.0011657	-0.000161427
377.85	-0.373869	0.0838149	0.115478	0.246594	-0.00117685	-0.000158083
378.35	-0.37527	0.0827488	0.115878	0.245963	-0.00118806	-0.000154711
378.85	-0.376661	0.0816768	0.116276	0.245322	-0.00119933	-0.000151312
379.35	-0.378042	0.080599	0.116673	0.244668	-0.00121067	-0.000147885
379.84	-0.379412	0.0795152	0.117069	0.244003	-0.00122208	-0.00014443
380.34	-0.380771	0.0784255	0.117463	0.243327	-0.00123354	-0.000140947
380.84	-0.38212	0.0773298	0.117855	0.242638	-0.00124508	-0.000137436
381.33	-0.383457	0.0762282	0.118246	0.241938	-0.00125668	-0.000133897
381.83	-0.384784	0.0751206	0.118636	0.241226	-0.00126834	-0.000130329
382.33	-0.3861	0.074007	0.119024	0.240502	-0.00128007	-0.000126733
382.82	-0.387406	0.0728873	0.119411	0.239766	-0.00129186	-0.000123109
383.31	-0.3887	0.0717616	0.119796	0.239018	-0.00130373	-0.000119455
383.8	-0.389983	0.0706299	0.120179	0.238258	-0.00131565	-0.000115774
384.28	-0.391254	0.0694922	0.120561	0.237485	-0.00132765	-0.000112063
384.76	-0.392514	0.0683484	0.120941	0.236701	-0.00133971	-0.000108324
385.24	-0.393763	0.0671986	0.12132	0.235904	-0.00135183	-0.000104555
385.73	-0.395	0.0660427	0.121697	0.235096	-0.00136403	-0.000100758
386.21	-0.396225	0.0648807	0.122072	0.234274	-0.00137629	-9.69309e-05
386.69	-0.397439	0.0637127	0.122446	0.233441	-0.00138861	-9.30751e-05
387.17	-0.398641	0.0625385	0.122818	0.232595	-0.00140101	-8.919e-05
387.65	-0.399832	0.0613582	0.123188	0.231737	-0.00141347	-8.52757e-05
388.14	-0.401011	0.0601718	0.123557	0.230866	-0.00142599	-8.13322e-05
388.63	-0.402178	0.0589792	0.123924	0.229983	-0.00143859	-7.73593e-05
389.12	-0.403334	0.0577804	0.124289	0.229088	-0.00145125	-7.33571e-05
389.62	-0.404478	0.0565755	0.124653	0.22818	-0.00146398	-6.93255e-05
390.12	-0.40561	0.0553644	0.125015	0.227259	-0.00147677	-6.52644e-05
390.62	-0.406731	0.0541471	0.125375	0.226326	-0.00148964	-6.11738e-05
391.12	-0.407839	0.0529236	0.125733	0.225381	-0.00150256	-5.70536e-05
391.61	-0.408936	0.051694	0.12609	0.224423	-0.00151556	-5.29037e-05
392.09	-0.41002	0.0504582	0.126445	0.223452	-0.00152863	-4.87241e-05
392.57	-0.411092	0.0492162	0.126798	0.222468	-0.00154176	-4.45146e-05
393.05	-0.412151	0.047968	0.12715	0.221472	-0.00155496	-4.02753e-05
393.52	-0.413198	0.0467137	0.127499	0.220463	-0.00156822	-3.60062e-05
393.99	-0.414233	0.0454533	0.127847	0.219441	-0.00158156	-3.17071e-05
394.45	-0.415255	0.0441867	0.128193	0.218407	-0.00159496	-2.73781e-05
394.92	-0.416265	0.042914	0.128537	0.217359	-0.00160842	-2.30192e-05
395.38	-0.417262	0.0416352	0.128879	0.216299	-0.00162196	-1.86303e-05
395.84	-0.418246	0.0403503	0.129219	0.215226	-0.00163556	-1.42113e-05
396.31	-0.419217	0.0390593	0.129558	0.21414	-0.00164923	-9.76232e-06
396.77	-0.420174	0.0377623	0.129894	0.213041	-0.00166297	-5.28325e-06
397.24	-0.421119	0.0364593	0.130228	0.211929	-0.00167677	-7.74103e-07
397.7	-0.422051	0.0351502	0.130561	0.210804	-0.00169064	3.76517e-06
398.17	-0.422969	0.033835	0.130891	0.209666	-0.00170458	8.33458e-06
398.64	-0.423875	0.0325139	0.131219	0.208515	-0.00171858	1.29341e-05
399.12	-0.424767	0.0311866	0.131546	0.207351	-0.00173265	1.75638e-05
399.6	-0.425646	0.0298533	0.13187	0.206175	-0.00174679	2.22236e-05
400.09	-0.426511	0.028514	0.132192	0.204985	-0.00176099	2.69136e-05
400.58	-0.427364	0.0271685	0.132513	0.203782	-0.00177526	3.16336e-05
401.07	-0.428203	0.0258169	0.132831	0.202566	-0.0017896	3.63837e-05
401.56	-0.42903	0.0244593	0.133147	0.201337	-0.001804	4.11641e-05
402.05	-0.429843	0.0230956	0.133461	0.200095	-0.00181847	4.59745e-05
402.53	-0.430642	0.0217258	0.133774	0.19884	-0.001833	5.08152e-05
403.01	-0.431429	0.0203498	0.134084	0.197572	-0.0018476	5.5686e-05
403.49	-0.432202	0.0189678	0.134392	0.19629	-0.00186227	6.0587e-05
403.96	-0.432962	0.0175796	0.134698	0.194996	-0.001877	6.55182e-05
404.43	-0.433709	0.0161853	0.135002	0.193689	-0.0018918	7.04796e-05
404.9	-0.434442	0.0147848	0.135303	0.192368	-0.00190666	7.54712e-05
405.37	-0.435162	0.0133782	0.135603	0.191035	-0.00192159	8.0493e-05
405.83	-0.435869	0.0119654	0.135901	0.189688	-0.00193658	8.55448e-05
406.3	-0.436563	0.0105465	0.136197	0.188328	-0.00195164	9.06266e-05
406.77	-0.437244	0.00912148	0.13649	0.186956	-0.00196676	9.57384e-05
407.24	-0.437911	0.00769034	0.136781	0.18557	-0.00198195	0.00010088
407.71	-0.438566	0.0062531	0.137071	0.184171	-0.0019972	0.000106052
408.18	-0.439207	0.00480978	0.137358	0.182759	-0.00201251	0.000111253
408.65	-0.439835	0.00336036	0.137643	0.181335	-0.00202789	0.000116484
409.13	-0.44045	0.00190484	0.137926	0.179897	-0.00204333	0.000121745
409.61	-0.441052	0.000443201	0.138207	0.178447	-0.00205883	0.000127035
410.09	-0.441641	-0.00102455	0.138486	0.176983	-0.00207439	0.000132355
410.57	-0.442218	-0.00249841	0.138762	0.175507	-0.00209002	0.000137705
411.05	-0.442782	-0.0039784	0.139037	0.174018	-0.00210571	0.000143083
411.52	-0.443333	-0.0054645	0.139309	0.172517	-0.00212145	0.000148491
411.99	-0.443871	-0.00695674	0.13958	0.171002	-0.00213726	0.000153928
412.47	-0.444397	-0.00845509	0.139848	0.169475	-0.00215313	0.000159394
412.94	-0.444911	-0.00995954	0.140115	0.167936	-0.00216906	0.00016489
413.41	-0.445412	-0.0114701	0.140379	0.166383	-0.00218506	0.000170414
413.87	-0.4459	-0.0129867	0.140641	0.164818	-0.0022011	0.000175967
414.34	-0.446376	-0.0145094	0.140901	0.163241	-0.00221721	0.000181549
414.81	-0.44684	-0.0160382	0.141159	0.16165	-0.00223338	0.000187159
415.27	-0.447291	-0.0175731	0.141414	0.160048	-0.00224961	0.000192799
415.73	-0.447729	-0.0191141	0.141668	0.158432	-0.0022659	0.000198467
416.19	-0.448155	-0.0206611	0.14192	0.156804	-0.00228224	0.000204165
416.64	-0.448568	-0.0222142	0.142169	0.155163	-0.00229864	0.00020989
417.1	-0.448968	-0.0237732	0.142416	0.15351	-0.0023151	0.000215645
417.55	-0.449356	-0.0253383	0.142661	0.151844	-0.00233162	0.000221428
418	-0.449731	-0.0269094	0.142904	0.150166	-0.0023482	0.00022724
418.45	-0.450094	-0.0284864	0.143144	0.148475	-0.00236483	0.00023308
418.9	-0.450443	-0.0300693	0.143383	0.146771	-0.00238152	0.000238949
419.35	-0.45078	-0.031658	0.143619	0.145055	-0.00239827	0.000244846
419.81	-0.451103	-0.0332527	0.143852	0.143326	-0.00241507	0.000250772
420.26	-0.451414	-0.0348533	0.144084	0.141584	-0.00243193	0.000256726
420.72	-0.451711	-0.0364597	0.144313	0.13983	-0.00244885	0.000262708
421.18	-0.451996	-0.0380719	0.14454	0.138064	-0.00246582	0.000268719
421.64	-0.452267	-0.03969	0.144764	0.136284	-0.00248284	0.000274758
422.11	-0.452526	-0.041314	0.144987	0.134493	-0.00249993	0.000280826
422.58	-0.452771	-0.0429438	0.145207	0.132689	-0.00251706	0.000286921
423.05	-0.453004	-0.0445794	0.145424	0.130872	-0.00253425	0.000293045
423.52	-0.453224	-0.0462209	0.14564	0.129043	-0.0025515	0.000299196
423.98	-0.453431	-0.0478681	0.145853	0.127201	-0.0025688	0.000305376
424.43	-0.453624	-0.0495212	0.146063	0.125347	-0.00258615	0.000311584
424.88	-0.453804	-0.05118	0.146271	0.12348	-0.00260356	0.00031782
425.33	-0.453972	-0.0528445	0.146477	0.121601	-0.00262102	0.000324084
425.78	-0.454125	-0.0545148	0.14668	0.119709	-0.00263853	0.000330375
426.22	-0.454266	-0.0561909	0.146881	0.117804	-0.0026561	0.000336695
426.66	-0.454393	-0.0578727	0.14708	0.115887	-0.00267372	0.000343043
427.09	-0.454506	-0.0595602	0.147276	0.113958	-0.00269139	0.000349419
427.53	-0.454607	-0.0612534	0.147469	0.112016	-0.00270911	0.000355823
427.96	-0.454693	-0.0629523	0.14766	0.110061	-0.00272689	0.000362255
428.4	-0.454767	-0.0646568	0.147848	0.108094	-0.00274472	0.000368714
428.83	-0.454827	-0.066367	0.148034	0.106114	-0.0027626	0.000375201
429.27	-0.454873	-0.0680827	0.148218	0.104122	-0.00278053	0.000381715
429.71	-0.454906	-0.069804	0.148399	0.102117	-0.00279851	0.000388257
430.15	-0.454925	-0.0715307	0.148577	0.100101	-0.00281654	0.000394826
430.59	-0.454931	-0.073263	0.148753	0.0980713	-0.00283461	0.000401423
431.03	-0.454924	-0.0750008	0.148926	0.0960298	-0.00285274	0.000408046
431.48	-0.454903	-0.076744	0.149097	0.0939761	-0.00287092	0.000414696
431.93	-0.454869	-0.0784927	0.149265	0.0919102	-0.00288914	0.000421374
432.38	-0.454821	-0.0802467	0.14943	0.0898321	-0.00290741	0.000428077
432.83	-0.454761	-0.0820061	0.149593	0.0877421	-0.00292573	0.000434807
433.29	-0.454687	-0.0837709	0.149754	0.0856401	-0.00294409	0.000441563
433.75	-0.4546	-0.085541	0.149911	0.0835262	-0.0029625	0.000448346
434.21	-0.454501	-0.0873164	0.150067	0.0814005	-0.00298095	0.000455154
434.67	-0.454388	-0.089097	0.150219	0.079263	-0.00299944	0.000461987
435.12	-0.454262	-0.0908829	0.150369	0.0771137	-0.00301798	0.000468847
435.57	-0.454124	-0.0926739	0.150517	0.0749527	-0.00303656	0.000475732
436.01	-0.453972	-0.09447	0.150661	0.0727799	-0.00305518	0.000482643
436.46	-0.453807	-0.0962713	0.150803	0.0705955	-0.00307385	0.000489578
436.9	-0.453629	-0.0980776	0.150943	0.0683993	-0.00309255	0.00049654
437.34	-0.453437	-0.099889	0.151079	0.0661915	-0.0031113	0.000503526
437.78	-0.453233	-0.101705	0.151213	0.0639721	-0.00313009	0.000510538
438.21	-0.453015	-0.103527	0.151345	0.0617411	-0.00314891	0.000517574
438.65	-0.452784	-0.105353	0.151473	0.0594987	-0.00316778	0.000524635
439.09	-0.45254	-0.107184	0.151599	0.0572449	-0.00318669	0.00053172
439.53	-0.452283	-0.10902	0.151722	0.0549797	-0.00320563	0.00053883
439.97	-0.452013	-0.110861	0.151842	0.0527032	-0.00322461	0.000545964
440.41	-0.451729	-0.112706	0.15196	0.0504153	-0.00324362	0.000553122
440.86	-0.451432	-0.114557	0.152074	0.0481163	-0.00326268	0.000560304
441.3	-0.451122	-0.116411	0.152186	0.045806	-0.00328176	0.00056751
441.75	-0.450799	-0.118271	0.152295	0.0434847	-0.00330089	0.00057474
442.2	-0.450462	-0.120135	0.152401	0.0411521	-0.00332004	0.000581993
442.66	-0.450113	-0.122003	0.152505	0.0388086	-0.00333924	0.000589269
443.12	-0.44975	-0.123876	0.152605	0.036454	-0.00335846	0.000596569
443.58	-0.449374	-0.125754	0.152703	0.0340886	-0.00337772	0.000603892
444.04	-0.448985	-0.127636	0.152797	0.0317123	-0.003397	0.000611237
444.5	-0.448584	-0.129522	0.152889	0.0293252	-0.00341632	0.000618605
444.96	-0.448169	-0.131413	0.152978	0.0269273	-0.00343567	0.000625996
445.42	-0.447742	-0.133308	0.153064	0.0245187	-0.00345505	0.00063341
445.87	-0.447301	-0.135208	0.153148	0.0220994	-0.00347446	0.000640845
446.31	-0.446848	-0.137112	0.153228	0.0196694	-0.0034939	0.000648303
446.75	-0.446382	-0.13902	0.153306	0.0172288	-0.00351337	0.000655784
447.19	-0.445903	-0.140933	0.15338	0.0147776	-0.00353286	0.000663286
447.63	-0.445411	-0.14285	0.153452	0.0123157	-0.00355239	0.000670811
448.06	-0.444906	-0.144771	0.15352	0.00984319	-0.00357194	0.000678357
448.49	-0.444389	-0.146697	0.153586	0.00736017	-0.00359152	0.000685925
448.91	-0.443858	-0.148627	0.153649	0.0048667	-0.00361113	0.000693515
449.34	-0.443315	-0.150561	0.153709	0.00236284	-0.00363076	0.000701127
449.77	-0.44276	-0.152499	0.153765	-0.000151361	-0.00365042	0.00070876
450.19	-0.442192	-0.154441	0.153819	-0.00267585	-0.0036701	0.000716414
450.61	-0.441611	-0.156388	0.15387	-0.00521055	-0.0036898	0.000724089
451.04	-0.441018	-0.158339	0.153918	-0.0077554	-0.00370953	0.000731785
451.46	-0.440412	-0.160293	0.153963	-0.0103103	-0.00372928	0.000739501
451.89	-0.439795	-0.162252	0.154006	-0.0128753	-0.00374906	0.000747238
452.31	-0.439165	-0.164215	0.154045	-0.0154502	-0.00376885	0.000754995
452.74	-0.438523	-0.166182	0.154081	-0.018035	-0.00378867	0.000762773
453.17	-0.437869	-0.168154	0.154114	-0.0206297	-0.0038085	0.00077057
453.61	-0.437203	-0.170129	0.154144	-0.0232342	-0.00382836	0.000778388
454.04	-0.436526	-0.172108	0.154172	-0.0258484	-0.00384823	0.000786225
454.48	-0.435836	-0.174091	0.154196	-0.0284721	-0.00386812	0.000794081
454.92	-0.435136	-0.176078	0.154218	-0.0311054	-0.00388803	0.000801957
455.37	-0.434424	-0.17807	0.154236	-0.0337483	-0.00390796	0.000809852
455.8	-0.4337	-0.180065	0.154252	-0.0364005	-0.0039279	0.000817767
456.24	-0.432966	-0.182064	0.154265	-0.0390621	-0.00394786	0.0008257
456.67	-0.43222	-0.184067	0.154274	-0.0417331	-0.00396783	0.000833651
457.09	-0.431463	-0.186074	0.154281	-0.0444134	-0.00398782	0.000841622
457.51	-0.430694	-0.188085	0.154285	-0.0471029	-0.00400782	0.000849611
457.93	-0.429915	-0.1901	0.154286	-0.0498017	-0.00402784	0.000857618
458.34	-0.429124	-0.192119	0.154284	-0.0525097	-0.00404787	0.000865644
458.76	-0.428322	-0.194142	0.154279	-0.0552269	-0.00406791	0.000873687
459.17	-0.427509	-0.196168	0.154271	-0.0579531	-0.00408797	0.000881749
459.58	-0.426685	-0.198198	0.15426	-0.0606884	-0.00410803	0.000889829
459.99	-0.42585	-0.200232	0.154246	-0.0634326	-0.00412811	0.000897926
460.4	-0.425004	-0.20227	0.154229	-0.0661858	-0.00414819	0.000906041
460.81	-0.424147	-0.204312	0.154209	-0.0689479	-0.00416829	0.000914173
461.22	-0.423279	-0.206357	0.154186	-0.0717187	-0.00418839	0.000922323
461.63	-0.4224	-0.208405	0.15416	-0.0744984	-0.00420851	0.00093049
462.04	-0.42151	-0.210458	0.154131	-0.0772868	-0.00422863	0.000938673
462.45	-0.42061	-0.212514	0.154098	-0.080084	-0.00424875	0.000946874
462.87	-0.419698	-0.214573	0.154063	-0.0828898	-0.00426889	0.000955091
463.28	-0.418776	-0.216636	0.154025	-0.0857042	-0.00428903	0.000963325
463.7	-0.417843	-0.218703	0.153983	-0.0885272	-0.00430917	0.000971575
464.13	-0.416899	-0.220773	0.153939	-0.0913588	-0.00432933	0.000979842
464.55	-0.415945	-0.222847	0.153892	-0.0941988	-0.00434948	0.000988125
464.98	-0.414981	-0.224925	0.153841	-0.0970472	-0.00436964	0.000996424
465.42	-0.414006	-0.227006	0.153787	-0.099904	-0.0043898	0.00100474
465.85	-0.413021	-0.22909	0.153731	-0.102769	-0.00440997	0.00101307
466.29	-0.412026	-0.231178	0.153671	-0.105643	-0.00443014	0.00102142
466.72	-0.41102	-0.23327	0.153608	-0.108525	-0.00445031	0.00102978
467.14	-0.410003	-0.235365	0.153542	-0.111415	-0.00447049	0.00103816
467.57	-0.408977	-0.237464	0.153473	-0.114313	-0.00449066	0.00104655
467.99	-0.40794	-0.239566	0.153401	-0.11722	-0.00451084	0.00105496
468.41	-0.406893	-0.241672	0.153326	-0.120135	-0.00453101	0.00106339
468.82	-0.405836	-0.243781	0.153247	-0.123058	-0.00455119	0.00107183
469.24	-0.404769	-0.245893	0.153166	-0.125989	-0.00457137	0.00108028
469.65	-0.403692	-0.248009	0.153081	-0.128929	-0.00459154	0.00108875
470.06	-0.402605	-0.250129	0.152994	-0.131876	-0.00461171	0.00109724
470.48	-0.401508	-0.252252	0.152903	-0.134831	-0.00463188	0.00110574
470.89	-0.400401	-0.254378	0.152809	-0.137794	-0.00465205	0.00111425
471.3	-0.399285	-0.256508	0.152712	-0.140765	-0.00467221	0.00112278
471.71	-0.398159	-0.258641	0.152611	-0.143743	-0.00469237	0.00113132
472.13	-0.397024	-0.260777	0.152508	-0.146729	-0.00471252	0.00113987
472.54	-0.395879	-0.262916	0.152402	-0.149723	-0.00473266	0.00114844
472.96	-0.394725	-0.265059	0.152292	-0.152724	-0.0047528	0.00115703
473.37	-0.393562	-0.267205	0.152179	-0.155732	-0.00477292	0.00116562
473.78	-0.39239	-0.269354	0.152063	-0.158747	-0.00479304	0.00117423
474.19	-0.391209	-0.271506	0.151945	-0.161769	-0.00481315	0.00118285
474.6	-0.390019	-0.273662	0.151823	-0.164799	-0.00483324	0.00119148
475.01	-0.388821	-0.27582	0.151697	-0.167835	-0.00485333	0.00120013
475.42	-0.387615	-0.277982	0.151569	-0.170878	-0.0048734	0.00120878
475.83	-0.386401	-0.280146	0.151438	-0.173927	-0.00489345	0.00121745
476.24	-0.385178	-0.282314	0.151304	-0.176983	-0.00491349	0.00122613
476.65	-0.383948	-0.284484	0.151166	-0.180046	-0.00493351	0.00123482
477.05	-0.382709	-0.286657	0.151026	-0.183114	-0.00495352	0.00124352
477.46	-0.381463	-0.288833	0.150882	-0.18619	-0.00497351	0.00125223
477.87	-0.380208	-0.291012	0.150735	-0.189271	-0.00499347	0.00126095
478.28	-0.378947	-0.293194	0.150585	-0.192358	-0.00501342	0.00126968
478.68	-0.377677	-0.295379	0.150432	-0.195452	-0.00503335	0.00127842
479.09	-0.3764	-0.297566	0.150276	-0.198551	-0.00505326	0.00128717
479.5	-0.375116	-0.299756	0.150117	-0.201655	-0.00507314	0.00129593
479.9	-0.373825	-0.301948	0.149955	-0.204766	-0.00509299	0.00130469
480.31	-0.372527	-0.304143	0.14979	-0.207881	-0.00511283	0.00131347
480.71	-0.371222	-0.30634	0.149621	-0.211002	-0.00513263	0.00132225
481.12	-0.36991	-0.30854	0.14945	-0.214128	-0.0051524	0.00133104
481.52	-0.368592	-0.310741	0.149275	-0.217259	-0.00517215	0.00133984
481.93	-0.367267	-0.312946	0.149097	-0.220395	-0.00519186	0.00134864
482.33	-0.365936	-0.315152	0.148916	-0.223536	-0.00521155	0.00135745
482.74	-0.364599	-0.31736	0.148733	-0.226681	-0.0052312	0.00136627
483.14	-0.363256	-0.319571	0.148545	-0.229831	-0.00525081	0.00137509
483.55	-0.361907	-0.321784	0.148355	-0.232985	-0.0052704	0.00138392
483.95	-0.360552	-0.323999	0.148162	-0.236144	-0.00528994	0.00139275
484.36	-0.359191	-0.326216	0.147966	-0.239306	-0.00530945	0.00140159
484.76	-0.357826	-0.328435	0.147767	-0.242473	-0.00532892	0.00141043
485.17	-0.356455	-0.330655	0.147564	-0.245643	-0.00534835	0.00141928
485.57	-0.355079	-0.332878	0.147359	-0.248818	-0.00536774	0.00142813
485.98	-0.353698	-0.335103	0.147151	-0.251996	-0.00538709	0.00143699
486.38	-0.352312	-0.33733	0.146939	-0.255178	-0.0054064	0.00144585
486.79	-0.350922	-0.339558	0.146725	-0.258363	-0.00542567	0.00145471
487.19	-0.349527	-0.341789	0.146507	-0.261552	-0.00544489	0.00146358
487.6	-0.348128	-0.344021	0.146287	-0.264744	-0.00546407	0.00147245
488.01	-0.346724	-0.346255	0.146063	-0.267939	-0.0054832	0.00148132
488.41	-0.345316	-0.348491	0.145836	-0.271138	-0.00550229	0.00149019
488.82	-0.343905	-0.350729	0.145607	-0.274339	-0.00552133	0.00149907
489.24	-0.342489	-0.352969	0.145374	-0.277544	-0.00554032	0.00150795
489.65	-0.341071	-0.35521	0.145139	-0.280751	-0.00555926	0.00151683
490.06	-0.339648	-0.357453	0.1449	-0.28396	-0.00557815	0.00152571
490.48	-0.338223	-0.359697	0.144659	-0.287172	-0.00559699	0.00153459
490.89	-0.336795	-0.361943	0.144414	-0.290387	-0.00561577	0.00154348
491.3	-0.335364	-0.364191	0.144167	-0.293603	-0.0056345	0.00155236
491.7	-0.33393	-0.366439	0.143916	-0.296822	-0.00565317	0.00156124
492.11	-0.332494	-0.36869	0.143663	-0.300042	-0.00567178	0.00157012
492.52	-0.331056	-0.370941	0.143407	-0.303264	-0.00569034	0.001579
492.92	-0.329616	-0.373194	0.143148	-0.306487	-0.00570883	0.00158788
493.33	-0.328174	-0.375449	0.142886	-0.309712	-0.00572727	0.00159676
493.73	-0.326731	-0.377704	0.142621	-0.312938	-0.00574564	0.00160563
494.14	-0.325287	-0.379961	0.142353	-0.316165	-0.00576395	0.00161451
494.54	-0.323842	-0.382219	0.142082	-0.319392	-0.00578219	0.00162337
494.94	-0.322395	-0.384478	0.141809	-0.322621	-0.00580036	0.00163224
495.35	-0.320949	-0.386739	0.141533	-0.32585	-0.00581847	0.0016411
495.75	-0.319501	-0.389	0.141254	-0.32908	-0.00583651	0.00164996
496.15	-0.318054	-0.391263	0.140972	-0.33231	-0.00585448	0.00165882
496.55	-0.316606	-0.393526	0.140687	-0.335541	-0.00587238	0.00166767
496.95	-0.315158	-0.39579	0.1404	-0.338771	-0.00589021	0.00167651
497.35	-0.31371	-0.398056	0.140109	-0.342002	-0.00590797	0.00168535
497.75	-0.312262	-0.400322	0.139816	-0.345233	-0.00592565	0.00169419
498.15	-0.310814	-0.402589	0.13952	-0.348463	-0.00594325	0.00170302
498.55	-0.309367	-0.404857	0.139221	-0.351693	-0.00596079	0.00171184
498.94	-0.307921	-0.407126	0.13892	-0.354923	-0.00597824	0.00172066
499.35	-0.306475	-0.409396	0.138615	-0.358153	-0.00599562	0.00172947
499.75	-0.30503	-0.411666	0.138308	-0.361381	-0.00601291	0.00173827
500.16	-0.303586	-0.413936	0.137998	-0.364609	-0.00603013	0.00174707
500.56	-0.302142	-0.416207	0.137685	-0.367836	-0.00604726	0.00175586
500.96	-0.3007	-0.418479	0.137369	-0.371062	-0.00606431	0.00176464
501.36	-0.299259	-0.420751	0.137051	-0.374286	-0.00608128	0.00177341
501.75	-0.29782	-0.423024	0.136729	-0.37751	-0.00609816	0.00178217
502.14	-0.296381	-0.425296	0.136405	-0.380732	-0.00611496	0.00179093
502.53	-0.294945	-0.42757	0.136078	-0.383953	-0.00613167	0.00179968
502.92	-0.293509	-0.429843	0.135748	-0.387172	-0.00614829	0.00180842
503.3	-0.292076	-0.432117	0.135415	-0.39039	-0.00616482	0.00181714
503.69	-0.290645	-0.434391	0.135079	-0.393606	-0.00618126	0.00182586
504.07	-0.289215	-0.436665	0.134741	-0.396821	-0.00619762	0.00183457
504.45	-0.287787	-0.438939	0.134399	-0.400033	-0.00621388	0.00184327
504.84	-0.286362	-0.441214	0.134055	-0.403244	-0.00623005	0.00185196
505.22	-0.284939	-0.443488	0.133708	-0.406452	-0.00624613	0.00186064
505.6	-0.283517	-0.445763	0.133358	-0.409659	-0.00626211	0.00186931
505.99	-0.282098	-0.448038	0.133005	-0.412863	-0.006278	0.00187796
506.37	-0.280681	-0.450312	0.132649	-0.416066	-0.00629379	0.00188661
506.76	-0.279266	-0.452587	0.13229	-0.419266	-0.00630949	0.00189525
507.15	-0.277853	-0.454862	0.131928	-0.422464	-0.00632509	0.00190387
507.54	-0.276443	-0.457136	0.131564	-0.42566	-0.0063406	0.00191248
507.94	-0.275035	-0.459411	0.131196	-0.428854	-0.00635601	0.00192108
508.34	-0.273629	-0.461685	0.130825	-0.432045	-0.00637132	0.00192967
508.74	-0.272226	-0.46396	0.130452	-0.435233	-0.00638653	0.00193825
509.14	-0.270826	-0.466234	0.130075	-0.438419	-0.00640164	0.00194682
509.53	-0.269428	-0.468507	0.129696	-0.441602	-0.00641664	0.00195537
509.93	-0.268033	-0.470781	0.129313	-0.444782	-0.00643154	0.00196391
510.32	-0.266641	-0.473054	0.128927	-0.447959	-0.00644634	0.00197243
510.7	-0.265252	-0.475326	0.128539	-0.451133	-0.00646103	0.00198095
511.09	-0.263866	-0.477598	0.128147	-0.454303	-0.00647562	0.00198944
511.47	-0.262483	-0.479869	0.127753	-0.457471	-0.0064901	0.00199793
511.85	-0.261104	-0.48214	0.127355	-0.460635	-0.00650447	0.0020064
512.23	-0.259728	-0.48441	0.126954	-0.463795	-0.00651873	0.00201485
512.61	-0.258356	-0.486679	0.126551	-0.466952	-0.00653287	0.00202329
512.99	-0.256987	-0.488948	0.126144	-0.470104	-0.00654691	0.00203171
513.37	-0.255622	-0.491216	0.125734	-0.473253	-0.00656083	0.00204012
513.74	-0.254262	-0.493482	0.125322	-0.476397	-0.00657464	0.00204851
514.12	-0.252905	-0.495748	0.124906	-0.479538	-0.00658833	0.00205689
514.5	-0.251552	-0.498013	0.124487	-0.482674	-0.0066019	0.00206525
514.88	-0.250204	-0.500277	0.124065	-0.485806	-0.00661535	0.00207359
515.26	-0.248859	-0.50254	0.12364	-0.488933	-0.00662869	0.00208191
515.64	-0.247519	-0.504801	0.123212	-0.492056	-0.00664191	0.00209022
516.02	-0.246183	-0.507062	0.122781	-0.495174	-0.006655	0.00209851
516.41	-0.24485	-0.509321	0.122347	-0.498288	-0.00666798	0.00210678
516.79	-0.243522	-0.511579	0.121909	-0.501397	-0.00668083	0.00211503
517.19	-0.242198	-0.513835	0.121469	-0.504501	-0.00669357	0.00212327
517.58	-0.240878	-0.51609	0.121025	-0.507601	-0.00670617	0.00213148
517.98	-0.239562	-0.518344	0.120578	-0.510695	-0.00671865	0.00213968
518.38	-0.238251	-0.520596	0.120128	-0.513784	-0.00673101	0.00214786
518.78	-0.236944	-0.522846	0.119674	-0.516868	-0.00674323	0.00215602
519.18	-0.235641	-0.525095	0.119217	-0.519947	-0.00675533	0.00216416
519.58	-0.234343	-0.527342	0.118757	-0.523021	-0.0067673	0.00217228
519.98	-0.233049	-0.529587	0.118294	-0.526089	-0.00677914	0.00218038
520.37	-0.231759	-0.53183	0.117827	-0.529151	-0.00679084	0.00218846
520.77	-0.230474	-0.534071	0.117357	-0.532208	-0.00680242	0.00219652
521.16	-0.229193	-0.53631	0.116884	-0.535259	-0.00681386	0.00220456
521.56	-0.227917	-0.538548	0.116407	-0.538305	-0.00682516	0.00221257
521.95	-0.226645	-0.540783	0.115927	-0.541345	-0.00683633	0.00222057
522.35	-0.225378	-0.543016	0.115444	-0.544378	-0.00684737	0.00222854
522.75	-0.224117	-0.545246	0.114957	-0.547405	-0.00685826	0.00223649
523.14	-0.22286	-0.547475	0.114467	-0.550427	-0.00686902	0.00224442
523.54	-0.221608	-0.549701	0.113973	-0.553442	-0.00687963	0.00225233
523.94	-0.220361	-0.551925	0.113476	-0.55645	-0.00689011	0.00226021
524.33	-0.219119	-0.554147	0.112976	-0.559453	-0.00690045	0.00226807
524.72	-0.217882	-0.556366	0.112472	-0.562449	-0.00691064	0.00227591
525.11	-0.21665	-0.558583	0.111965	-0.565438	-0.00692069	0.00228373
525.5	-0.215423	-0.560798	0.111454	-0.568421	-0.0069306	0.00229152
525.89	-0.214201	-0.56301	0.11094	-0.571397	-0.00694036	0.00229928
526.28	-0.212984	-0.565219	0.110423	-0.574367	-0.00694997	0.00230703
526.67	-0.211773	-0.567426	0.109902	-0.577329	-0.00695945	0.00231475
527.06	-0.210567	-0.56963	0.109377	-0.580285	-0.00696877	0.00232244
527.45	-0.209367	-0.571832	0.108849	-0.583234	-0.00697794	0.00233011
527.84	-0.208172	-0.574031	0.108317	-0.586176	-0.00698697	0.00233776
528.23	-0.206983	-0.576227	0.107782	-0.58911	-0.00699584	0.00234538
528.63	-0.205799	-0.578421	0.107244	-0.592037	-0.00700456	0.00235298
529.02	-0.204622	-0.580611	0.106701	-0.594957	-0.00701313	0.00236055
529.41	-0.20345	-0.582799	0.106156	-0.597869	-0.00702154	0.00236809
529.8	-0.202285	-0.584983	0.105606	-0.600773	-0.0070298	0.0023756
530.19	-0.201125	-0.587165	0.105054	-0.60367	-0.0070379	0.00238309
530.57	-0.199972	-0.589344	0.104497	-0.606559	-0.00704585	0.00239056
530.95	-0.198826	-0.591519	0.103937	-0.609439	-0.00705363	0.00239799
531.32	-0.197686	-0.593692	0.103374	-0.612312	-0.00706126	0.0024054
531.7	-0.196553	-0.595861	0.102807	-0.615176	-0.00706872	0.00241278
532.07	-0.195427	-0.598027	0.102237	-0.618032	-0.00707603	0.00242013
532.44	-0.194308	-0.60019	0.101663	-0.620879	-0.00708316	0.00242745
532.81	-0.193197	-0.60235	0.101085	-0.623718	-0.00709014	0.00243475
533.18	-0.192092	-0.604506	0.100504	-0.626548	-0.00709694	0.00244201
533.54	-0.190995	-0.606659	0.0999193	-0.629369	-0.00710359	0.00244924
533.91	-0.189904	-0.608808	0.099331	-0.632182	-0.00711006	0.00245645
534.28	-0.188821	-0.610955	0.0987391	-0.634986	-0.00711637	0.00246363
534.64	-0.187745	-0.613097	0.0981436	-0.63778	-0.0071225	0.00247077
535.01	-0.186676	-0.615236	0.0975443	-0.640566	-0.00712847	0.00247789
535.38	-0.185615	-0.617372	0.0969414	-0.643343	-0.00713427	0.00248497
535.75	-0.18456	-0.619504	0.0963349	-0.646111	-0.0071399	0.00249203
536.12	-0.183513	-0.621632	0.0957246	-0.64887	-0.00714536	0.00249905
536.49	-0.182473	-0.623756	0.0951105	-0.651619	-0.00715064	0.00250605
536.86	-0.18144	-0.625877	0.0944927	-0.65436	-0.00715575	0.00251301
537.24	-0.180414	-0.627994	0.0938711	-0.657091	-0.00716068	0.00251994
537.61	-0.179395	-0.630107	0.0932457	-0.659813	-0.00716544	0.00252684
538	-0.178383	-0.632216	0.0926164	-0.662525	-0.00717002	0.00253371
538.38	-0.177378	-0.634321	0.0919832	-0.665228	-0.00717443	0.00254055
538.76	-0.17638	-0.636422	0.0913461	-0.667922	-0.00717866	0.00254736
539.14	-0.175388	-0.638519	0.0907051	-0.670606	-0.00718271	0.00255413
539.52	-0.174404	-0.640612	0.0900602	-0.673281	-0.00718658	0.00256087
539.89	-0.173427	-0.642701	0.0894114	-0.675946	-0.00719027	0.00256758
540.26	-0.172456	-0.644785	0.0887586	-0.678601	-0.00719378	0.00257426
540.63	-0.171493	-0.646866	0.0881018	-0.681246	-0.00719711	0.0025809
541	-0.170537	-0.648942	0.0874411	-0.683882	-0.00720026	0.00258751
541.36	-0.169589	-0.651014	0.0867764	-0.686508	-0.00720322	0.00259409
541.72	-0.168647	-0.653081	0.0861076	-0.689124	-0.007206	0.00260063
542.09	-0.167712	-0.655144	0.0854348	-0.69173	-0.0072086	0.00260714
542.45	-0.166784	-0.657203	0.0847579	-0.694326	-0.00721101	0.00261362
542.81	-0.165863	-0.659258	0.0840769	-0.696912	-0.00721323	0.00262007
543.17	-0.164949	-0.661308	0.0833918	-0.699489	-0.00721527	0.00262648
543.53	-0.164041	-0.663353	0.0827025	-0.702055	-0.00721712	0.00263285
543.89	-0.163141	-0.665394	0.0820091	-0.704612	-0.00721878	0.0026392
544.25	-0.162247	-0.667431	0.0813114	-0.707158	-0.00722026	0.0026455
544.62	-0.16136	-0.669463	0.0806096	-0.709694	-0.00722154	0.00265178
544.98	-0.16048	-0.67149	0.0799035	-0.71222	-0.00722264	0.00265802
545.35	-0.159606	-0.673513	0.0791932	-0.714736	-0.00722354	0.00266422
545.71	-0.15874	-0.675531	0.0784786	-0.717242	-0.00722426	0.00267039
546.08	-0.157881	-0.677544	0.0777597	-0.719736	-0.00722478	0.00267653
546.45	-0.157028	-0.679552	0.0770365	-0.722221	-0.0072251	0.00268263
546.83	-0.156182	-0.681555	0.076309	-0.724695	-0.00722523	0.00268869
547.21	-0.155344	-0.683553	0.0755772	-0.727158	-0.00722516	0.00269472
547.59	-0.154512	-0.685546	0.074841	-0.72961	-0.00722489	0.00270071
547.97	-0.153688	-0.687535	0.0741005	-0.732051	-0.00722443	0.00270666
548.36	-0.152872	-0.689518	0.0733556	-0.734481	-0.00722376	0.00271258
548.74	-0.152063	-0.691495	0.0726064	-0.7369	-0.0072229	0.00271846
549.12	-0.151261	-0.693468	0.0718529	-0.739308	-0.00722182	0.0027243
549.5	-0.150468	-0.695435	0.071095	-0.741704	-0.00722055	0.0027301
549.88	-0.149683	-0.697397	0.0703327	-0.744088	-0.00721906	0.00273587
550.26	-0.148906	-0.699353	0.0695661	-0.74646	-0.00721737	0.00274159
550.63	-0.148137	-0.701304	0.0687951	-0.74882	-0.00721547	0.00274728
551.01	-0.147377	-0.703249	0.0680197	-0.751168	-0.00721336	0.00275292
551.39	-0.146625	-0.705189	0.0672399	-0.753504	-0.00721104	0.00275853
551.77	-0.145881	-0.707123	0.0664557	-0.755828	-0.00720851	0.00276409
552.15	-0.145146	-0.709051	0.065667	-0.758139	-0.00720576	0.00276962
552.53	-0.144419	-0.710973	0.0648739	-0.760438	-0.00720279	0.0027751
552.91	-0.143701	-0.712889	0.0640762	-0.762724	-0.00719962	0.00278054
553.28	-0.142991	-0.714799	0.0632741	-0.764997	-0.00719622	0.00278594
553.66	-0.14229	-0.716703	0.0624675	-0.767258	-0.0071926	0.0027913
554.05	-0.141599	-0.718602	0.0616563	-0.769505	-0.00718876	0.00279662
554.45	-0.140916	-0.720493	0.0608407	-0.771739	-0.0071847	0.00280189
554.85	-0.140243	-0.722379	0.0600205	-0.77396	-0.00718042	0.00280712
555.24	-0.139578	-0.724258	0.0591958	-0.776167	-0.00717591	0.00281231
555.63	-0.138924	-0.72613	0.0583665	-0.77836	-0.00717117	0.00281745
556.03	-0.138278	-0.727996	0.0575327	-0.780539	-0.0071662	0.00282254
556.42	-0.137643	-0.729855	0.0566942	-0.782705	-0.00716101	0.00282759
556.81	-0.137017	-0.731707	0.0558512	-0.784856	-0.00715558	0.0028326
557.21	-0.1364	-0.733553	0.0550036	-0.786993	-0.00714992	0.00283756
557.6	-0.135794	-0.735392	0.0541513	-0.789115	-0.00714402	0.00284247
558	-0.135198	-0.737223	0.0532945	-0.791223	-0.00713788	0.00284734
558.39	-0.134613	-0.739048	0.0524331	-0.793316	-0.00713151	0.00285216
558.79	-0.134038	-0.740865	0.0515671	-0.795393	-0.0071249	0.00285693
559.19	-0.133474	-0.742676	0.0506964	-0.797456	-0.00711805	0.00286165
559.59	-0.132921	-0.744479	0.0498212	-0.799503	-0.00711095	0.00286632
559.98	-0.132379	-0.746274	0.0489414	-0.801534	-0.00710361	0.00287095
560.38	-0.131848	-0.748063	0.0480569	-0.80355	-0.00709602	0.00287553
560.77	-0.131328	-0.749844	0.0471677	-0.80555	-0.00708818	0.00288005
561.16	-0.13082	-0.751617	0.046274	-0.807535	-0.0070801	0.00288453
561.55	-0.130323	-0.753383	0.0453755	-0.809503	-0.00707177	0.00288895
561.94	-0.129838	-0.755141	0.0444725	-0.811455	-0.00706318	0.00289333
562.33	-0.129364	-0.756891	0.0435647	-0.813391	-0.00705435	0.00289765
562.72	-0.128903	-0.758634	0.0426522	-0.81531	-0.00704526	0.00290192
563.1	-0.128453	-0.760369	0.0417351	-0.817213	-0.00703591	0.00290614
563.49	-0.128016	-0.762096	0.0408134	-0.819098	-0.0070263	0.00291031
563.87	-0.127592	-0.763815	0.0398869	-0.820967	-0.00701644	0.00291442
564.26	-0.12718	-0.765525	0.0389559	-0.822818	-0.00700631	0.00291848
564.65	-0.126782	-0.767228	0.0380201	-0.824651	-0.00699592	0.00292249
565.03	-0.126397	-0.768922	0.0370797	-0.826467	-0.00698526	0.00292644
565.42	-0.126026	-0.770608	0.0361347	-0.828264	-0.00697433	0.00293033
565.81	-0.125668	-0.772285	0.035185	-0.830044	-0.00696313	0.00293417
566.2	-0.125325	-0.773954	0.0342307	-0.831804	-0.00695166	0.00293795
566.59	-0.124996	-0.775614	0.0332718	-0.833546	-0.00693992	0.00294167
566.98	-0.124682	-0.777266	0.0323083	-0.835269	-0.0069279	0.00294534
567.37	-0.124383	-0.778908	0.0313401	-0.836973	-0.0069156	0.00294895
567.77	-0.124099	-0.780542	0.0303674	-0.838657	-0.00690302	0.00295249
568.16	-0.123831	-0.782166	0.0293901	-0.840321	-0.00689015	0.00295598
568.56	-0.123579	-0.783782	0.0284083	-0.841965	-0.006877	0.00295941
568.95	-0.123343	-0.785388	0.0274219	-0.843589	-0.00686357	0.00296277
569.34	-0.123123	-0.786985	0.0264309	-0.845193	-0.00684984	0.00296608
569.72	-0.12292	-0.788573	0.0254354	-0.846775	-0.00683583	0.00296932
570.11	-0.122734	-0.790151	0.0244354	-0.848337	-0.00682152	0.0029725
570.49	-0.122565	-0.79172	0.0234307	-0.849878	-0.00680692	0.00297562
570.87	-0.122413	-0.793279	0.0224215	-0.851398	-0.00679202	0.00297867
571.25	-0.122278	-0.794829	0.0214076	-0.852897	-0.00677682	0.00298166
571.63	-0.12216	-0.796369	0.0203892	-0.854374	-0.00676133	0.00298458
572	-0.122059	-0.797899	0.0193661	-0.855829	-0.00674554	0.00298744
572.38	-0.121976	-0.799419	0.0183384	-0.857263	-0.00672944	0.00299024
572.76	-0.121911	-0.800929	0.0173061	-0.858674	-0.00671304	0.00299297
573.13	-0.121864	-0.802429	0.0162691	-0.860064	-0.00669633	0.00299563
573.51	-0.121835	-0.803919	0.0152275	-0.861431	-0.00667932	0.00299822
573.89	-0.121824	-0.805398	0.0141812	-0.862775	-0.006662	0.00300075
574.27	-0.12183	-0.806867	0.0131302	-0.864097	-0.00664436	0.00300321
574.64	-0.121856	-0.808326	0.0120745	-0.865396	-0.00662642	0.00300561
575.02	-0.121899	-0.809774	0.011014	-0.866672	-0.00660816	0.00300793
575.4	-0.121961	-0.811212	0.00994883	-0.867925	-0.00658958	0.00301019
575.78	-0.122041	-0.812638	0.00887887	-0.869155	-0.00657069	0.00301238
576.17	-0.12214	-0.814054	0.00780415	-0.870361	-0.00655148	0.00301449
576.55	-0.122257	-0.81546	0.00672464	-0.871544	-0.00653195	0.00301654
576.94	-0.122394	-0.816854	0.00564035	-0.872703	-0.0065121	0.00301852
577.33	-0.12255	-0.818237	0.00455128	-0.873839	-0.00649193	0.00302042
577.72	-0.122725	-0.819609	0.0034574	-0.87495	-0.00647143	0.00302226
578.1	-0.122919	-0.82097	0.0023587	-0.876037	-0.00645061	0.00302402
578.49	-0.123132	-0.82232	0.00125513	-0.8771	-0.00642945	0.00302571
578.87	-0.123364	-0.823658	0.00014666	-0.878139	-0.00640797	0.00302733
579.25	-0.123616	-0.824985	-0.00096672	-0.879153	-0.00638617	0.00302888
579.63	-0.123886	-0.826301	-0.00208504	-0.880143	-0.00636403	0.00303035
580.01	-0.124176	-0.827605	-0.00320834	-0.881108	-0.00634155	0.00303175
580.39	-0.124485	-0.828898	-0.00433665	-0.882049	-0.00631875	0.00303308
580.77	-0.124813	-0.830179	-0.00546999	-0.882965	-0.00629561	0.00303434
581.14	-0.12516	-0.831448	-0.00660838	-0.883857	-0.00627214	0.00303552
581.52	-0.125526	-0.832705	-0.00775183	-0.884723	-0.00624833	0.00303662
581.89	-0.125912	-0.833951	-0.00890034	-0.885565	-0.00622418	0.00303766
582.27	-0.126317	-0.835185	-0.0100539	-0.886381	-0.0061997	0.00303861
582.64	-0.126742	-0.836406	-0.0112126	-0.887171	-0.00617487	0.00303949
583.02	-0.127187	-0.837616	-0.0123764	-0.887936	-0.00614969	0.0030403
583.39	-0.127651	-0.838813	-0.0135454	-0.888675	-0.00612417	0.00304103
583.77	-0.128136	-0.839998	-0.0147195	-0.889388	-0.00609831	0.00304168
584.15	-0.128641	-0.84117	-0.0158987	-0.890075	-0.00607209	0.00304225
584.53	-0.129167	-0.84233	-0.017083	-0.890735	-0.00604552	0.00304275
584.91	-0.129713	-0.843477	-0.0182725	-0.891369	-0.0060186	0.00304316
585.29	-0.13028	-0.844611	-0.0194672	-0.891976	-0.00599132	0.0030435
585.68	-0.130869	-0.845732	-0.020667	-0.892555	-0.00596368	0.00304376
586.06	-0.131479	-0.846841	-0.0218719	-0.893107	-0.00593569	0.00304393
586.45	-0.132111	-0.847936	-0.0230819	-0.893631	-0.00590733	0.00304403
586.84	-0.132765	-0.849018	-0.0242971	-0.894127	-0.0058786	0.00304404
587.23	-0.133441	-0.850087	-0.0255174	-0.894595	-0.00584951	0.00304397
587.61	-0.13414	-0.851143	-0.0267428	-0.895035	-0.00582004	0.00304381
588	-0.134862	-0.852185	-0.0279734	-0.895446	-0.00579021	0.00304358
588.38	-0.135606	-0.853213	-0.0292092	-0.895828	-0.00576001	0.00304325
588.76	-0.136372	-0.854227	-0.0304502	-0.896181	-0.00572942	0.00304285
589.14	-0.137162	-0.855228	-0.0316964	-0.896505	-0.00569847	0.00304235
589.52	-0.137974	-0.856215	-0.0329479	-0.8968	-0.00566714	0.00304178
589.9	-0.138809	-0.857188	-0.0342047	-0.897066	-0.00563543	0.00304112
590.28	-0.139666	-0.858147	-0.0354668	-0.897303	-0.00560334	0.00304037
590.66	-0.140547	-0.859092	-0.0367342	-0.89751	-0.00557086	0.00303953
591.04	-0.141452	-0.860023	-0.0380069	-0.897687	-0.005538	0.00303861
591.42	-0.142379	-0.860939	-0.0392849	-0.897833	-0.00550476	0.00303759
591.8	-0.143331	-0.86184	-0.0405682	-0.89795	-0.00547112	0.00303649
592.18	-0.144306	-0.862727	-0.0418569	-0.898035	-0.0054371	0.00303531
592.56	-0.145305	-0.8636	-0.043151	-0.898091	-0.00540268	0.00303403
592.94	-0.146328	-0.864457	-0.0444504	-0.898115	-0.00536787	0.00303266
593.32	-0.147375	-0.865299	-0.0457553	-0.898108	-0.00533266	0.0030312
593.71	-0.148447	-0.866127	-0.0470655	-0.89807	-0.00529705	0.00302965
594.09	-0.149542	-0.866939	-0.0483812	-0.898	-0.00526104	0.003028
594.47	-0.150662	-0.867736	-0.0497023	-0.897899	-0.00522464	0.00302627
594.85	-0.151806	-0.868518	-0.0510288	-0.897767	-0.00518783	0.00302444
595.23	-0.152976	-0.869284	-0.0523607	-0.897602	-0.00515062	0.00302252
595.6	-0.15417	-0.870035	-0.053698	-0.897405	-0.005113	0.00302051
595.98	-0.155389	-0.87077	-0.0550407	-0.897176	-0.00507498	0.00301841
596.35	-0.156633	-0.87149	-0.0563888	-0.896914	-0.00503654	0.0030162
596.72	-0.157902	-0.872194	-0.0577423	-0.89662	-0.0049977	0.00301391
597.1	-0.159196	-0.872881	-0.0591013	-0.896293	-0.00495845	0.00301152
597.47	-0.160515	-0.873553	-0.0604656	-0.895934	-0.00491879	0.00300903
597.84	-0.161859	-0.874209	-0.0618354	-0.895542	-0.00487871	0.00300645
598.21	-0.163228	-0.874849	-0.0632107	-0.895117	-0.00483823	0.00300378
598.58	-0.164621	-0.875473	-0.0645914	-0.894659	-0.00479733	0.00300101
598.95	-0.166039	-0.87608	-0.0659776	-0.894168	-0.00475602	0.00299814
599.33	-0.167482	-0.876671	-0.0673692	-0.893645	-0.0047143	0.00299518
599.7	-0.16895	-0.877246	-0.0687662	-0.893088	-0.00467216	0.00299212
600.07	-0.170443	-0.877805	-0.0701687	-0.892497	-0.0046296	0.00298897
600.45	-0.171961	-0.878346	-0.0715765	-0.891873	-0.00458663	0.00298572
600.83	-0.173504	-0.878871	-0.0729898	-0.891216	-0.00454324	0.00298237
601.2	-0.175072	-0.87938	-0.0744085	-0.890524	-0.00449943	0.00297892
601.58	-0.176665	-0.879871	-0.0758325	-0.889799	-0.0044552	0.00297537
601.96	-0.178284	-0.880346	-0.0772619	-0.889039	-0.00441055	0.00297173
602.34	-0.179929	-0.880803	-0.0786966	-0.888245	-0.00436547	0.00296799
602.72	-0.181599	-0.881243	-0.0801367	-0.887417	-0.00431997	0.00296414
603.1	-0.183294	-0.881667	-0.081582	-0.886554	-0.00427405	0.0029602
603.47	-0.185015	-0.882072	-0.0830326	-0.885656	-0.00422771	0.00295616
603.84	-0.186761	-0.882461	-0.0844885	-0.884724	-0.00418093	0.00295202
604.21	-0.188534	-0.882832	-0.0859495	-0.883757	-0.00413374	0.00294778
604.58	-0.190333	-0.883185	-0.0874157	-0.882754	-0.00408611	0.00294343
604.94	-0.192157	-0.883521	-0.0888871	-0.881717	-0.00403806	0.00293899
605.31	-0.194007	-0.883839	-0.0903635	-0.880644	-0.00398958	0.00293444
605.67	-0.195884	-0.884139	-0.0918451	-0.879535	-0.00394067	0.00292979
606.04	-0.197786	-0.884422	-0.0933318	-0.878391	-0.00389133	0.00292505
606.4	-0.199714	-0.884686	-0.0948235	-0.877211	-0.00384157	0.00292019
606.76	-0.201668	-0.884933	-0.0963203	-0.875996	-0.00379137	0.00291524
607.12	-0.203648	-0.885161	-0.0978222	-0.874745	-0.00374074	0.00291019
607.49	-0.205653	-0.885371	-0.0993291	-0.873458	-0.00368969	0.00290503
607.85	-0.207683	-0.885563	-0.100841	-0.872136	-0.00363821	0.00289977
608.21	-0.209738	-0.885737	-0.102358	-0.870778	-0.0035863	0.00289441
608.58	-0.211819	-0.885892	-0.10388	-0.869384	-0.00353395	0.00288894
608.94	-0.213925	-0.886029	-0.105407	-0.867955	-0.00348118	0.00288338
609.3	-0.216056	-0.886148	-0.10694	-0.866489	-0.00342798	0.00287771
609.67	-0.218212	-0.886247	-0.108477	-0.864987	-0.00337434	0.00287193
610.04	-0.220393	-0.886328	-0.110019	-0.863449	-0.00332028	0.00286606
610.41	-0.222599	-0.88639	-0.111566	-0.861875	-0.00326578	0.00286008
610.78	-0.224829	-0.886433	-0.113118	-0.860265	-0.00321086	0.00285399
611.15	-0.227084	-0.886458	-0.114675	-0.858619	-0.0031555	0.00284781
611.53	-0.229363	-0.886463	-0.116238	-0.856936	-0.00309971	0.00284152
611.9	-0.231666	-0.886449	-0.117805	-0.855218	-0.00304349	0.00283512
612.27	-0.233994	-0.886416	-0.119377	-0.853463	-0.00298684	0.00282863
612.64	-0.236344	-0.886364	-0.120954	-0.851672	-0.00292977	0.00282203
613.01	-0.238719	-0.886292	-0.122535	-0.849845	-0.00287226	0.00281533
613.38	-0.241117	-0.886202	-0.124122	-0.847982	-0.00281433	0.00280852
613.74	-0.243538	-0.886091	-0.125714	-0.846083	-0.00275597	0.00280161
614.1	-0.245983	-0.885962	-0.12731	-0.844148	-0.00269719	0.0027946
614.47	-0.24845	-0.885813	-0.128911	-0.842176	-0.00263798	0.00278748
614.83	-0.25094	-0.885644	-0.130517	-0.840169	-0.00257835	0.00278026
615.19	-0.253452	-0.885456	-0.132127	-0.838126	-0.00251829	0.00277294
615.55	-0.255985	-0.885248	-0.133742	-0.836047	-0.00245782	0.00276552
615.91	-0.258541	-0.885021	-0.135362	-0.833932	-0.00239692	0.002758
616.27	-0.261117	-0.884773	-0.136987	-0.831782	-0.0023356	0.00275037
616.63	-0.263715	-0.884506	-0.138616	-0.829596	-0.00227387	0.00274264
616.99	-0.266333	-0.884219	-0.14025	-0.827375	-0.00221172	0.00273482
617.35	-0.268971	-0.883913	-0.141889	-0.825119	-0.00214916	0.00272689
617.72	-0.27163	-0.883586	-0.143532	-0.822826	-0.00208618	0.00271885
618.08	-0.27431	-0.883239	-0.14518	-0.820499	-0.00202279	0.00271072
618.44	-0.277009	-0.882872	-0.146832	-0.818136	-0.00195898	0.00270249
618.81	-0.279728	-0.882485	-0.148489	-0.815737	-0.00189475	0.00269415
619.18	-0.282467	-0.882077	-0.150151	-0.813303	-0.00183012	0.00268571
619.54	-0.285226	-0.881649	-0.151816	-0.810833	-0.00176507	0.00267718
619.91	-0.288005	-0.881201	-0.153487	-0.808327	-0.0016996	0.00266853
620.29	-0.290802	-0.880732	-0.155161	-0.805786	-0.00163372	0.00265979
620.66	-0.29362	-0.880243	-0.15684	-0.803209	-0.00156743	0.00265095
621.03	-0.296456	-0.879733	-0.158524	-0.800596	-0.00150073	0.002642
621.4	-0.299312	-0.879202	-0.160211	-0.797947	-0.00143362	0.00263296
621.77	-0.302186	-0.87865	-0.161903	-0.795263	-0.00136609	0.00262381
622.14	-0.30508	-0.878077	-0.163599	-0.792542	-0.00129815	0.00261455
622.51	-0.307994	-0.877483	-0.165299	-0.789785	-0.0012298	0.0026052
622.87	-0.310926	-0.876868	-0.167004	-0.786991	-0.00116104	0.00259574
623.24	-0.313877	-0.876232	-0.168712	-0.784162	-0.00109187	0.00258618
623.61	-0.316847	-0.875575	-0.170424	-0.781296	-0.00102229	0.00257652
623.97	-0.319835	-0.874896	-0.172141	-0.778394	-0.00095229	0.00256676
624.33	-0.322842	-0.874196	-0.173861	-0.775455	-0.000881886	0.00255689
624.7	-0.325867	-0.873474	-0.175585	-0.772481	-0.000811073	0.00254692
625.06	-0.32891	-0.87273	-0.177314	-0.76947	-0.000739852	0.00253684
625.43	-0.331971	-0.871965	-0.179046	-0.766422	-0.000668223	0.00252667
625.79	-0.335049	-0.871179	-0.180782	-0.763338	-0.000596187	0.00251639
626.15	-0.338145	-0.87037	-0.182522	-0.760218	-0.000523743	0.00250601
626.51	-0.341259	-0.869539	-0.184265	-0.757061	-0.00045089	0.00249553
626.87	-0.34439	-0.868686	-0.186013	-0.753868	-0.000377628	0.00248494
627.23	-0.347539	-0.867811	-0.187764	-0.750637	-0.000303958	0.00247425
627.59	-0.350705	-0.866914	-0.189519	-0.74737	-0.000229879	0.00246345
627.95	-0.353889	-0.865994	-0.191277	-0.744065	-0.00015539	0.00245255
628.31	-0.35709	-0.865052	-0.193039	-0.740724	-8.04926e-05	0.00244155
628.67	-0.360309	-0.864087	-0.194805	-0.737345	-5.18604e-06	0.00243044
629.03	-0.363544	-0.863099	-0.196574	-0.733929	7.05279e-05	0.00241923
629.39	-0.366796	-0.862089	-0.198347	-0.730476	0.000146648	0.00240791
629.74	-0.370065	-0.861056	-0.200124	-0.726986	0.000223174	0.00239649
630.1	-0.37335	-0.86	-0.201903	-0.723459	0.000300105	0.00238497
630.46	-0.376652	-0.85892	-0.203687	-0.719894	0.00037744	0.00237334
630.82	-0.37997	-0.857818	-0.205473	-0.716293	0.000455177	0.00236161
631.17	-0.383303	-0.856693	-0.207263	-0.712654	0.000533316	0.00234977
631.53	-0.386653	-0.855544	-0.209055	-0.708978	0.000611854	0.00233783
631.89	-0.390017	-0.854373	-0.210851	-0.705265	0.00069079	0.00232579
632.24	-0.393397	-0.853177	-0.21265	-0.701515	0.000770123	0.00231364
632.6	-0.396791	-0.851959	-0.214452	-0.697728	0.000849851	0.0023014
632.96	-0.4002	-0.850717	-0.216258	-0.693904	0.00092997	0.00228904
633.31	-0.403622	-0.849452	-0.218065	-0.690043	0.00101048	0.00227659
633.67	-0.407058	-0.848163	-0.219876	-0.686147	0.00109137	0.00226404
634.03	-0.410506	-0.84685	-0.22169	-0.682214	0.00117265	0.00225138
634.39	-0.413968	-0.845514	-0.223506	-0.678244	0.00125432	0.00223863
634.75	-0.417442	-0.844154	-0.225325	-0.674239	0.00133636	0.00222577
635.11	-0.420928	-0.84277	-0.227147	-0.670197	0.00141878	0.00221281
635.48	-0.424427	-0.841363	-0.228971	-0.666118	0.00150159	0.00219975
635.84	-0.427937	-0.839931	-0.230798	-0.662004	0.00158477	0.00218659
636.21	-0.43146	-0.838475	-0.232627	-0.657853	0.00166833	0.00217333
636.57	-0.434994	-0.836995	-0.234458	-0.653665	0.00175226	0.00215997
636.93	-0.43854	-0.835491	-0.236292	-0.649441	0.00183658	0.00214651
637.29	-0.442098	-0.833963	-0.238128	-0.645181	0.00192126	0.00213295
637.65	-0.445666	-0.83241	-0.239966	-0.640884	0.00200632	0.00211929
638	-0.449245	-0.830833	-0.241806	-0.636551	0.00209175	0.00210553
638.36	-0.452834	-0.829231	-0.243649	-0.632182	0.00217754	0.00209166
638.71	-0.456433	-0.827605	-0.245493	-0.627776	0.0022637	0.0020777
639.06	-0.460042	-0.825953	-0.247339	-0.623335	0.00235022	0.00206364
639.41	-0.463662	-0.824278	-0.249187	-0.618857	0.00243711	0.00204948
639.76	-0.46729	-0.822577	-0.251036	-0.614343	0.00252436	0.00203523
640.11	-0.470928	-0.820851	-0.252887	-0.609792	0.00261196	0.00202087
640.46	-0.474575	-0.819101	-0.25474	-0.605206	0.00269992	0.00200641
640.8	-0.478231	-0.817325	-0.256594	-0.600584	0.00278824	0.00199186
641.15	-0.481895	-0.815524	-0.258449	-0.595925	0.00287692	0.00197721
641.5	-0.485567	-0.813698	-0.260306	-0.591231	0.00296594	0.00196246
641.84	-0.489246	-0.811847	-0.262164	-0.5865	0.00305532	0.00194761
642.19	-0.492933	-0.80997	-0.264024	-0.581735	0.00314504	0.00193267
642.54	-0.496627	-0.808068	-0.265885	-0.576933	0.00323511	0.00191762
642.89	-0.500327	-0.806141	-0.267746	-0.572096	0.00332552	0.00190249
643.24	-0.504034	-0.804188	-0.269609	-0.567224	0.00341627	0.00188725
643.59	-0.507746	-0.802209	-0.271473	-0.562316	0.00350737	0.00187192
643.94	-0.511465	-0.800205	-0.273338	-0.557372	0.00359881	0.00185649
644.3	-0.51519	-0.798175	-0.275204	-0.552393	0.00369058	0.00184097
644.65	-0.518919	-0.796119	-0.277071	-0.547378	0.0037827	0.00182535
645.01	-0.522654	-0.794036	-0.278939	-0.542328	0.00387515	0.00180963
645.37	-0.526395	-0.791928	-0.280808	-0.537242	0.00396794	0.00179382
645.73	-0.530139	-0.789794	-0.282677	-0.53212	0.00406107	0.00177791
646.08	-0.533888	-0.787633	-0.284547	-0.526963	0.00415453	0.0017619
646.44	-0.537641	-0.785446	-0.286418	-0.521771	0.00424832	0.0017458
646.79	-0.541397	-0.783232	-0.288289	-0.516544	0.00434244	0.00172961
647.14	-0.545156	-0.780992	-0.290162	-0.511281	0.00443689	0.00171332
647.49	-0.548918	-0.778725	-0.292034	-0.505984	0.00453166	0.00169694
647.84	-0.552682	-0.776432	-0.293907	-0.500652	0.00462675	0.00168046
648.19	-0.556448	-0.774112	-0.29578	-0.495285	0.00472216	0.00166389
648.54	-0.560216	-0.771766	-0.297654	-0.489883	0.00481789	0.00164722
648.89	-0.563984	-0.769392	-0.299528	-0.484447	0.00491393	0.00163046
649.23	-0.567753	-0.766992	-0.301402	-0.478976	0.00501029	0.00161361
649.58	-0.571523	-0.764565	-0.303277	-0.473471	0.00510696	0.00159667
649.92	-0.575292	-0.762111	-0.305152	-0.467932	0.00520394	0.00157964
650.27	-0.57906	-0.759629	-0.307027	-0.462359	0.00530123	0.00156251
650.62	-0.582827	-0.757121	-0.308902	-0.456752	0.00539882	0.0015453
650.96	-0.586592	-0.754586	-0.310777	-0.451112	0.00549671	0.00152799
651.31	-0.590355	-0.752023	-0.312652	-0.445438	0.0055949	0.00151059
651.65	-0.594115	-0.749433	-0.314527	-0.439731	0.00569339	0.00149311
652	-0.597872	-0.746815	-0.316402	-0.433991	0.00579217	0.00147553
652.35	-0.601626	-0.74417	-0.318276	-0.428217	0.00589125	0.00145787
652.7	-0.605377	-0.741498	-0.320151	-0.42241	0.00599062	0.00144011
653.05	-0.609123	-0.738797	-0.322025	-0.416569	0.00609028	0.00142227
653.4	-0.612866	-0.736069	-0.323899	-0.410695	0.00619023	0.00140434
653.76	-0.616604	-0.733313	-0.325773	-0.404789	0.00629048	0.00138632
654.11	-0.620338	-0.730529	-0.327647	-0.398849	0.00639101	0.00136821
654.47	-0.624066	-0.727717	-0.32952	-0.392876	0.00649182	0.00135001
654.83	-0.627788	-0.724877	-0.331392	-0.38687	0.00659292	0.00133173
655.18	-0.631505	-0.722009	-0.333264	-0.380831	0.0066943	0.00131336
655.54	-0.635216	-0.719113	-0.335135	-0.374759	0.00679595	0.0012949
655.89	-0.63892	-0.716188	-0.337006	-0.368654	0.00689789	0.00127635
656.24	-0.642617	-0.713234	-0.338875	-0.362517	0.0070001	0.00125772
656.59	-0.646307	-0.710253	-0.340744	-0.356347	0.00710258	0.001239
656.95	-0.64999	-0.707242	-0.342612	-0.350144	0.00720534	0.00122019
657.3	-0.653665	-0.704203	-0.34448	-0.343908	0.00730837	0.00120129
657.64	-0.657332	-0.701134	-0.346346	-0.33764	0.00741166	0.00118231
657.99	-0.660991	-0.698037	-0.348211	-0.331339	0.00751523	0.00116325
658.34	-0.66464	-0.694911	-0.350075	-0.325006	0.00761906	0.00114409
658.69	-0.668281	-0.691756	-0.351938	-0.318641	0.00772316	0.00112485
659.04	-0.671911	-0.688571	-0.3538	-0.312243	0.00782752	0.00110553
659.39	-0.675532	-0.685358	-0.355661	-0.305813	0.00793214	0.00108612
659.74	-0.679142	-0.682114	-0.357521	-0.299351	0.00803702	0.00106663
660.09	-0.682742	-0.678842	-0.359379	-0.292856	0.00814216	0.00104705
660.44	-0.68633	-0.675539	-0.361236	-0.28633	0.00824756	0.00102739
660.79	-0.689908	-0.672208	-0.363092	-0.279771	0.00835322	0.00100764
661.14	-0.693473	-0.668846	-0.364947	-0.27318	0.00845913	0.000987804
661.49	-0.697027	-0.665454	-0.3668	-0.266557	0.0085653	0.000967886
661.84	-0.700569	-0.662032	-0.368652	-0.259902	0.00867172	0.000947884
662.19	-0.704099	-0.65858	-0.370502	-0.253214	0.0087784	0.000927796
662.54	-0.707616	-0.655098	-0.372351	-0.246495	0.00888532	0.000907625
662.89	-0.711119	-0.651586	-0.374198	-0.239744	0.0089925	0.000887369
663.24	-0.714609	-0.648043	-0.376044	-0.232961	0.00909992	0.000867031
663.58	-0.718085	-0.64447	-0.377888	-0.226146	0.00920759	0.000846608
663.93	-0.721546	-0.640866	-0.379731	-0.219299	0.0093155	0.000826104
664.27	-0.724992	-0.637231	-0.381572	-0.212422	0.00942364	0.000805516
664.61	-0.728422	-0.633566	-0.38341	-0.205513	0.00953203	0.000784847
664.96	-0.731836	-0.62987	-0.385247	-0.198572	0.00964065	0.000764096
665.3	-0.735234	-0.626143	-0.387082	-0.191601	0.00974949	0.000743265
665.64	-0.738615	-0.622385	-0.388915	-0.184599	0.00985857	0.000722353
665.98	-0.741978	-0.618596	-0.390746	-0.177566	0.00996787	0.000701361
666.32	-0.745323	-0.614776	-0.392574	-0.170503	0.0100774	0.00068029
666.66	-0.748648	-0.610925	-0.394401	-0.16341	0.0101871	0.00065914
667	-0.751954	-0.607043	-0.396225	-0.156286	0.0102971	0.000637913
667.35	-0.75524	-0.603129	-0.398046	-0.149133	0.0104072	0.000616609
667.69	-0.758505	-0.599184	-0.399866	-0.141951	0.0105176	0.000595228
668.03	-0.761748	-0.595208	-0.401682	-0.13474	0.0106282	0.000573772
668.38	-0.764969	-0.5912	-0.403496	-0.127499	0.0107389	0.000552241
668.72	-0.768168	-0.587161	-0.405308	-0.12023	0.0108499	0.000530635
669.07	-0.771343	-0.583091	-0.407116	-0.112932	0.010961	0.000508955
669.42	-0.774494	-0.578988	-0.408922	-0.105605	0.0110724	0.000487202
669.77	-0.777622	-0.574854	-0.410724	-0.09825	0.0111839	0.000465376
670.12	-0.780725	-0.570688	-0.412524	-0.0908666	0.0112956	0.000443477
670.46	-0.783802	-0.56649	-0.414321	-0.0834552	0.0114075	0.000421506
670.81	-0.786854	-0.562261	-0.416114	-0.0760159	0.0115196	0.000399464
671.15	-0.789879	-0.557999	-0.417904	-0.0685491	0.0116318	0.000377351
671.5	-0.792876	-0.553705	-0.419691	-0.061055	0.0117442	0.00035517
671.84	-0.795845	-0.549379	-0.421474	-0.053534	0.0118568	0.000332919
672.18	-0.798786	-0.545021	-0.423254	-0.0459862	0.0119695	0.000310601
672.51	-0.801698	-0.540631	-0.425029	-0.0384118	0.0120824	0.000288216
672.85	-0.804579	-0.536208	-0.426801	-0.0308112	0.0121954	0.000265764
673.18	-0.80743	-0.531753	-0.428569	-0.0231846	0.0123085	0.000243248
673.52	-0.810249	-0.527266	-0.430333	-0.0155323	0.0124218	0.000220667
673.85	-0.813036	-0.522746	-0.432092	-0.0078544	0.0125353	0.000198021
674.19	-0.815791	-0.518194	-0.433848	-0.000151142	0.0126488	0.000175313
674.52	-0.818512	-0.513609	-0.435599	0.00757718	0.0127625	0.000152541
674.85	-0.821199	-0.508991	-0.437346	0.0153303	0.0128763	0.000129709
675.19	-0.823852	-0.504341	-0.439088	0.0231079	0.0129903	0.000106815
675.52	-0.826469	-0.499658	-0.440825	0.0309097	0.0131043	8.38613e-05
675.85	-0.829049	-0.494942	-0.442559	0.0387355	0.0132185	6.08482e-05
676.18	-0.831593	-0.490193	-0.444287	0.0465851	0.0133327	3.77764e-05
676.52	-0.8341	-0.485411	-0.44601	0.0544583	0.0134471	1.46465e-05
676.85	-0.836568	-0.480596	-0.447729	0.0623548	0.0135615	-8.54091e-06
677.19	-0.838998	-0.475748	-0.449443	0.0702745	0.0136761	-3.17852e-05
677.52	-0.841388	-0.470867	-0.451152	0.0782172	0.0137907	-5.50859e-05
677.86	-0.843739	-0.465952	-0.452856	0.0861828	0.0139055	-7.84426e-05
678.2	-0.846049	-0.461004	-0.454554	0.0941711	0.0140203	-0.000101855
678.54	-0.848319	-0.456023	-0.456248	0.102182	0.0141352	-0.000125322
678.88	-0.850547	-0.451008	-0.457937	0.110215	0.0142502	-0.000148843
679.22	-0.852732	-0.445959	-0.45962	0.11827	0.0143653	-0.000172418
679.56	-0.854874	-0.440876	-0.461298	0.126346	0.0144804	-0.000196044
679.91	-0.856971	-0.43576	-0.46297	0.134444	0.0145956	-0.000219722
680.25	-0.859024	-0.43061	-0.464637	0.142563	0.0147109	-0.000243451
680.59	-0.861031	-0.425427	-0.466298	0.150702	0.0148262	-0.000267228
680.92	-0.862991	-0.420209	-0.467953	0.158861	0.0149416	-0.000291053
681.26	-0.864904	-0.414958	-0.469602	0.167041	0.015057	-0.000314926
681.59	-0.866769	-0.409672	-0.471245	0.17524	0.0151725	-0.000338845
681.93	-0.868585	-0.404353	-0.472883	0.183458	0.0152879	-0.000362809
682.26	-0.870351	-0.398999	-0.474514	0.191695	0.0154035	-0.000386818
682.59	-0.872066	-0.393612	-0.476139	0.199951	0.015519	-0.000410871
682.92	-0.87373	-0.38819	-0.477757	0.208225	0.0156346	-0.000434966
683.26	-0.875341	-0.382733	-0.479369	0.216517	0.0157502	-0.000459103
683.59	-0.876899	-0.377243	-0.480975	0.224827	0.0158657	-0.00048328
683.92	-0.878403	-0.371718	-0.482574	0.233153	0.0159813	-0.000507496
684.25	-0.879852	-0.366159	-0.484166	0.241497	0.0160969	-0.000531751
684.58	-0.881245	-0.360566	-0.485752	0.249857	0.0162125	-0.000556044
684.91	-0.882582	-0.354937	-0.487331	0.258234	0.0163281	-0.000580373
685.24	-0.883862	-0.349275	-0.488903	0.266627	0.0164437	-0.000604739
685.57	-0.885084	-0.343577	-0.490468	0.275035	0.0165592	-0.00062914
685.91	-0.886247	-0.337845	-0.492025	0.28346	0.0166747	-0.000653577
686.24	-0.887352	-0.332078	-0.493576	0.2919	0.0167902	-0.000678048
686.57	-0.888398	-0.326276	-0.495119	0.300355	0.0169057	-0.000702552
686.91	-0.889383	-0.320439	-0.496655	0.308826	0.0170212	-0.00072709
687.25	-0.890307	-0.314567	-0.498184	0.317312	0.0171366	-0.00075166
687.58	-0.89117	-0.308659	-0.499705	0.325811	0.0172519	-0.000776262
687.92	-0.89197	-0.302717	-0.501218	0.334326	0.0173673	-0.000800894
688.26	-0.892707	-0.296739	-0.502724	0.342854	0.0174825	-0.000825556
688.61	-0.893381	-0.290725	-0.504222	0.351397	0.0175978	-0.000850248
688.95	-0.89399	-0.284676	-0.505711	0.359953	0.0177129	-0.000874969
689.29	-0.894535	-0.278592	-0.507193	0.368523	0.017828	-0.000899717
689.63	-0.895014	-0.272472	-0.508666	0.377107	0.0179431	-0.000924493
689.96	-0.895427	-0.266316	-0.510131	0.385703	0.018058	-0.000949296
690.3	-0.895774	-0.260124	-0.511588	0.394313	0.0181729	-0.000974125
690.64	-0.896054	-0.253896	-0.513036	0.402936	0.0182877	-0.000998981
690.97	-0.896265	-0.247632	-0.514476	0.411571	0.0184025	-0.00102386
691.31	-0.896409	-0.241332	-0.515908	0.420219	0.0185172	-0.00104877
691.64	-0.896483	-0.234996	-0.51733	0.42888	0.0186317	-0.0010737
691.97	-0.896488	-0.228623	-0.518744	0.437552	0.0187462	-0.00109865
692.31	-0.896423	-0.222214	-0.52015	0.446237	0.0188606	-0.00112363
692.64	-0.896287	-0.215769	-0.521546	0.454934	0.018975	-0.00114863
692.97	-0.896081	-0.209286	-0.522933	0.463643	0.0190892	-0.00117365
693.31	-0.895803	-0.202767	-0.524311	0.472364	0.0192033	-0.0011987
693.64	-0.895454	-0.196211	-0.525681	0.481097	0.0193173	-0.00122377
693.97	-0.895033	-0.189618	-0.527041	0.489842	0.0194312	-0.00124886
694.31	-0.894539	-0.182987	-0.528392	0.498599	0.0195451	-0.00127397
694.64	-0.893973	-0.17632	-0.529733	0.507368	0.0196588	-0.00129911
694.98	-0.893334	-0.169614	-0.531066	0.516148	0.0197724	-0.00132426
695.32	-0.892621	-0.162871	-0.532389	0.524941	0.0198859	-0.00134944
695.65	-0.891833	-0.156091	-0.533702	0.533745	0.0199993	-0.00137464
695.99	-0.89097	-0.149273	-0.535006	0.54256	0.0201126	-0.00139986
696.33	-0.890032	-0.142416	-0.5363	0.551386	0.0202257	-0.0014251
696.66	-0.889017	-0.135522	-0.537584	0.560223	0.0203388	-0.00145036
696.99	-0.887926	-0.12859	-0.538858	0.569071	0.0204517	-0.00147564
697.32	-0.886758	-0.12162	-0.540122	0.57793	0.0205644	-0.00150093
697.65	-0.885511	-0.114611	-0.541376	0.586799	0.0206771	-0.00152624
697.98	-0.884186	-0.107564	-0.54262	0.595679	0.0207896	-0.00155157
698.31	-0.882781	-0.100479	-0.543853	0.604568	0.0209019	-0.00157692
698.64	-0.881297	-0.0933553	-0.545076	0.613468	0.0210142	-0.00160228
698.96	-0.879732	-0.0861929	-0.546289	0.622377	0.0211262	-0.00162765
699.29	-0.878085	-0.0789918	-0.547491	0.631295	0.0212381	-0.00165304
699.62	-0.876356	-0.071752	-0.548681	0.640223	0.0213498	-0.00167844
699.94	-0.874545	-0.0644733	-0.549862	0.649159	0.0214614	-0.00170385
700.27	-0.872649	-0.0571557	-0.551031	0.658104	0.0215728	-0.00172927
700.6	-0.87067	-0.049799	-0.552189	0.667057	0.0216841	-0.00175471
700.92	-0.868607	-0.0424032	-0.553335	0.676019	0.0217951	-0.00178015
701.25	-0.866458	-0.034968	-0.554471	0.68499	0.021906	-0.00180561
701.58	-0.864224	-0.0274934	-0.555595	0.693969	0.0220167	-0.00183107
701.91	-0.861905	-0.0199793	-0.556707	0.702956	0.0221272	-0.00185655
702.23	-0.8595	-0.0124255	-0.557809	0.711952	0.0222375	-0.00188203
702.56	-0.857009	-0.00483176	-0.558898	0.720956	0.0223477	-0.00190753
702.9	-0.85443	0.00280189	-0.559976	0.729968	0.0224576	-0.00193303
703.23	-0.851765	0.0104756	-0.561041	0.738989	0.0225674	-0.00195855
703.56	-0.849011	0.0181894	-0.562095	0.748017	0.022677	-0.00198407
703.9	-0.846168	0.0259434	-0.563137	0.757053	0.0227863	-0.0020096
704.23	-0.843237	0.0337379	-0.564166	0.766097	0.0228955	-0.00203513
704.56	-0.840216	0.0415728	-0.565183	0.775149	0.0230044	-0.00206067
704.89	-0.837105	0.0494484	-0.566187	0.784208	0.0231132	-0.00208622
705.22	-0.833904	0.0573647	-0.567179	0.793275	0.0232217	-0.00211178
705.55	-0.830612	0.0653218	-0.568158	0.802349	0.02333	-0.00213734
705.87	-0.827228	0.0733199	-0.569124	0.811431	0.0234381	-0.0021629
706.2	-0.823753	0.0813591	-0.570078	0.82052	0.023546	-0.00218847
706.52	-0.820186	0.0894396	-0.571018	0.829616	0.0236536	-0.00221405
706.84	-0.816525	0.0975614	-0.571945	0.838719	0.023761	-0.00223963
707.16	-0.812771	0.105725	-0.572859	0.847828	0.0238682	-0.00226521
707.48	-0.808923	0.113929	-0.57376	0.856945	0.0239751	-0.00229079
707.8	-0.804979	0.122176	-0.574647	0.866067	0.0240818	-0.00231638
708.12	-0.80094	0.130464	-0.575521	0.875197	0.0241883	-0.00234197
708.44	-0.796806	0.138794	-0.576381	0.884332	0.0242945	-0.00236756
708.76	-0.792575	0.147166	-0.577228	0.893474	0.0244005	-0.00239315
709.07	-0.788248	0.15558	-0.57806	0.902622	0.0245062	-0.00241875
709.39	-0.783823	0.164037	-0.578879	0.911776	0.0246116	-0.00244434
709.71	-0.779301	0.172536	-0.579684	0.920937	0.0247168	-0.00246993
710.03	-0.774681	0.181078	-0.580475	0.930103	0.0248218	-0.00249553
710.35	-0.769963	0.189662	-0.581252	0.939276	0.0249265	-0.00252112
710.67	-0.765145	0.198289	-0.582015	0.948454	0.0250309	-0.00254672
710.99	-0.760228	0.20696	-0.582764	0.957639	0.0251351	-0.00257231
711.31	-0.755211	0.215673	-0.583498	0.966829	0.025239	-0.00259791
711.63	-0.750092	0.22443	-0.584218	0.976024	0.0253426	-0.0026235
711.95	-0.744872	0.23323	-0.584923	0.985225	0.0254459	-0.00264908
712.28	-0.73955	0.242073	-0.585614	0.99443	0.025549	-0.00267467
712.6	-0.734125	0.25096	-0.586289	1.00364	0.0256518	-0.00270025
712.93	-0.728597	0.25989	-0.58695	1.01286	0.0257542	-0.00272583
713.26	-0.722965	0.268864	-0.587596	1.02208	0.0258564	-0.0027514
713.59	-0.717228	0.277883	-0.588227	1.0313	0.0259583	-0.00277696
713.91	-0.711385	0.286945	-0.588843	1.04053	0.0260599	-0.00280253
714.24	-0.705436	0.296051	-0.589443	1.04976	0.0261612	-0.00282808
714.56	-0.699381	0.305201	-0.590028	1.059	0.0262622	-0.00285362
714.88	-0.693217	0.314396	-0.590598	1.06824	0.0263629	-0.00287916
715.21	-0.686945	0.323635	-0.591152	1.07748	0.0264632	-0.00290469
715.53	-0.680564	0.332919	-0.59169	1.08673	0.0265633	-0.00293021
715.85	-0.674073	0.342247	-0.592213	1.09598	0.026663	-0.00295572
716.16	-0.667471	0.35162	-0.59272	1.10523	0.0267624	-0.00298121
716.48	-0.660759	0.361038	-0.593211	1.11448	0.0268614	-0.0030067
716.8	-0.653935	0.370501	-0.593686	1.12374	0.0269601	-0.00303218
717.12	-0.646999	0.380009	-0.594144	1.133	0.0270585	-0.00305764
717.43	-0.639951	0.389563	-0.594587	1.14226	0.0271565	-0.00308309
717.75	-0.632791	0.399162	-0.595013	1.15152	0.0272542	-0.00310853
718.07	-0.625518	0.408806	-0.595424	1.16079	0.0273516	-0.00313396
718.38	-0.618132	0.418497	-0.595817	1.17006	0.0274486	-0.00315938
718.7	-0.610632	0.428233	-0.596194	1.17933	0.0275453	-0.00318478
719.02	-0.603018	0.438016	-0.596555	1.18861	0.0276416	-0.00321017
719.33	-0.595289	0.447844	-0.596898	1.19789	0.0277376	-0.00323555
719.65	-0.587445	0.45772	-0.597225	1.20717	0.0278332	-0.00326092
719.97	-0.579486	0.467641	-0.597535	1.21645	0.0279285	-0.00328627
720.29	-0.571412	0.47761	-0.597828	1.22573	0.0280234	-0.00331161
720.61	-0.563222	0.487625	-0.598104	1.23502	0.0281179	-0.00333694
720.93	-0.554916	0.497688	-0.598362	1.24431	0.0282121	-0.00336226
721.25	-0.546493	0.507798	-0.598603	1.25361	0.028306	-0.00338756
721.58	-0.537954	0.517955	-0.598827	1.2629	0.0283995	-0.00341285
721.9	-0.529297	0.528159	-0.599033	1.2722	0.0284926	-0.00343813
722.23	-0.520522	0.538412	-0.599222	1.28151	0.0285853	-0.00346339
722.55	-0.511629	0.548712	-0.599393	1.29081	0.0286777	-0.00348864
722.88	-0.502617	0.55906	-0.599546	1.30012	0.0287697	-0.00351387
723.2	-0.493485	0.569456	-0.599681	1.30943	0.0288613	-0.00353909
723.53	-0.484234	0.579901	-0.599799	1.31874	0.0289525	-0.0035643
723.85	-0.474863	0.590394	-0.599898	1.32805	0.0290434	-0.00358949
724.17	-0.465372	0.600935	-0.59998	1.33737	0.0291339	-0.00361467
724.49	-0.45576	0.611526	-0.600043	1.34669	0.029224	-0.00363983
724.81	-0.446028	0.622165	-0.600088	1.35601	0.0293138	-0.00366498
725.13	-0.436174	0.632854	-0.600115	1.36534	0.0294031	-0.00369012
725.45	-0.426199	0.643592	-0.600124	1.37467	0.0294921	-0.00371524
725.77	-0.416103	0.65438	-0.600114	1.384	0.0295807	-0.00374035
726.09	-0.405885	0.665217	-0.600085	1.39334	0.0296689	-0.00376545
726.41	-0.395544	0.676104	-0.600038	1.40268	0.0297567	-0.00379053
726.73	-0.38508	0.687042	-0.599972	1.41202	0.0298441	-0.00381559
727.05	-0.374492	0.698029	-0.599888	1.42136	0.0299311	-0.00384064
727.37	-0.36378	0.709067	-0.599784	1.43071	0.0300178	-0.00386568
727.69	-0.352944	0.720155	-0.599662	1.44006	0.030104	-0.0038907
728.01	-0.341982	0.731294	-0.59952	1.44941	0.0301898	-0.00391571
728.33	-0.330895	0.742483	-0.599359	1.45877	0.0302753	-0.0039407
728.65	-0.319681	0.753723	-0.599178	1.46812	0.0303603	-0.00396567
728.97	-0.308341	0.765015	-0.598978	1.47748	0.0304449	-0.00399062
729.29	-0.296872	0.776357	-0.598759	1.48684	0.0305291	-0.00401556
729.61	-0.285276	0.787751	-0.598519	1.49621	0.0306128	-0.00404048
729.93	-0.273549	0.799196	-0.59826	1.50557	0.0306961	-0.00406538
730.25	-0.261693	0.810693	-0.597981	1.51494	0.030779	-0.00409025
730.57	-0.249704	0.822241	-0.597682	1.52431	0.0308615	-0.00411511
730.89	-0.237584	0.833841	-0.597362	1.53367	0.0309435	-0.00413994
731.21	-0.225331	0.845493	-0.597022	1.54304	0.031025	-0.00416475
731.52	-0.212944	0.857197	-0.596662	1.55241	0.0311062	-0.00418954
731.84	-0.200424	0.868952	-0.596281	1.56178	0.0311868	-0.0042143
732.15	-0.187768	0.880761	-0.595879	1.57115	0.031267	-0.00423903
732.46	-0.174977	0.892621	-0.595456	1.58052	0.0313467	-0.00426374
732.78	-0.162051	0.904534	-0.595012	1.58988	0.031426	-0.00428843
733.09	-0.148988	0.9165	-0.594547	1.59925	0.0315047	-0.00431309
733.4	-0.135788	0.928518	-0.594061	1.60862	0.031583	-0.00433772
733.71	-0.12245	0.94059	-0.593554	1.61799	0.0316609	-0.00436233
734.03	-0.108974	0.952715	-0.593025	1.62735	0.0317382	-0.0043869
734.34	-0.0953572	0.964892	-0.592474	1.63672	0.031815	-0.00441145
734.65	-0.0816002	0.977124	-0.591901	1.64608	0.0318914	-0.00443597
734.96	-0.067702	0.989408	-0.591307	1.65544	0.0319672	-0.00446045
735.28	-0.0536617	1.00175	-0.59069	1.6648	0.0320425	-0.00448491
735.59	-0.0394786	1.01414	-0.590051	1.67416	0.0321174	-0.00450933
735.91	-0.0251517	1.02658	-0.589389	1.68352	0.0321916	-0.00453371
736.22	-0.0106802	1.03908	-0.588705	1.69287	0.0322654	-0.00455806
736.54	0.00393652	1.05164	-0.587998	1.70222	0.0323386	-0.00458238
736.85	0.0186994	1.06424	-0.587268	1.71157	0.0324113	-0.00460666
737.17	0.0336092	1.07691	-0.586515	1.72091	0.0324835	-0.0046309
737.49	0.0486671	1.08962	-0.585738	1.73025	0.0325551	-0.00465511
737.81	0.0638741	1.10239	-0.584939	1.73958	0.0326262	-0.00467927
738.13	0.0792312	1.11522	-0.584116	1.74891	0.0326967	-0.0047034
738.45	0.0947393	1.1281	-0.583269	1.75824	0.0327666	-0.00472748
738.76	0.110399	1.14103	-0.582399	1.76756	0.0328359	-0.00475152
739.08	0.126212	1.15402	-0.581504	1.77688	0.0329047	-0.00477552
739.39	0.142177	1.16707	-0.580586	1.78619	0.0329729	-0.00479948
739.7	0.158297	1.18017	-0.579643	1.79549	0.0330405	-0.00482339
740.01	0.174572	1.19333	-0.578676	1.80479	0.0331076	-0.00484725
740.32	0.191002	1.20654	-0.577685	1.81408	0.033174	-0.00487107
740.63	0.207589	1.21981	-0.576669	1.82337	0.0332398	-0.00489484
740.93	0.224333	1.23313	-0.575629	1.83265	0.033305	-0.00491857
741.24	0.241235	1.24651	-0.574564	1.84192	0.0333697	-0.00494224
741.55	0.258296	1.25994	-0.573474	1.85119	0.0334336	-0.00496587
741.85	0.275518	1.27343	-0.572358	1.86045	0.033497	-0.00498945
742.16	0.292902	1.28698	-0.571218	1.8697	0.0335598	-0.00501297
742.46	0.310449	1.30059	-0.570052	1.87894	0.0336218	-0.00503644
742.77	0.328159	1.31425	-0.56886	1.88817	0.0336833	-0.00505985
743.07	0.346035	1.32796	-0.567643	1.89739	0.0337441	-0.00508321
743.37	0.364077	1.34174	-0.566399	1.90661	0.0338042	-0.00510651
743.68	0.382287	1.35557	-0.56513	1.91581	0.0338637	-0.00512975
743.98	0.400666	1.36945	-0.563834	1.925	0.0339224	-0.00515293
744.29	0.419214	1.3834	-0.562511	1.93418	0.0339805	-0.00517604
744.6	0.437934	1.3974	-0.561162	1.94335	0.0340379	-0.0051991
744.9	0.456827	1.41145	-0.559786	1.9525	0.0340946	-0.00522208
745.21	0.475893	1.42557	-0.558383	1.96165	0.0341506	-0.005245
745.52	0.495135	1.43974	-0.556953	1.97078	0.0342058	-0.00526785
745.83	0.514553	1.45397	-0.555496	1.97989	0.0342603	-0.00529063
746.14	0.53415	1.46826	-0.554011	1.98899	0.0343141	-0.00531334
746.45	0.553925	1.4826	-0.552498	1.99808	0.0343671	-0.00533597
746.76	0.57388	1.497	-0.550958	2.00715	0.0344194	-0.00535853
747.07	0.594015	1.51146	-0.54939	2.0162	0.0344709	-0.00538102
747.39	0.614333	1.52598	-0.547793	2.02524	0.0345217	-0.00540343
747.7	0.634833	1.54055	-0.546168	2.03427	0.0345717	-0.00542576
748.01	0.655516	1.55519	-0.544515	2.04327	0.0346209	-0.00544801
748.32	0.676384	1.56988	-0.542833	2.05226	0.0346693	-0.00547019
748.63	0.697436	1.58463	-0.541122	2.06124	0.0347169	-0.00549228
748.94	0.718675	1.59944	-0.539383	2.0702	0.0347638	-0.0055143
749.24	0.740101	1.61431	-0.537614	2.07913	0.0348099	-0.00553623
749.55	0.761715	1.62923	-0.535816	2.08806	0.0348551	-0.00555808
749.86	0.783518	1.64422	-0.533989	2.09696	0.0348995	-0.00557985
750.16	0.805511	1.65926	-0.532132	2.10585	0.0349432	-0.00560153
750.46	0.827694	1.67437	-0.530246	2.11471	0.034986	-0.00562313
750.77	0.850068	1.68953	-0.528329	2.12356	0.0350279	-0.00564464
751.07	0.872635	1.70475	-0.526383	2.13239	0.0350691	-0.00566606
751.37	0.895394	1.72003	-0.524406	2.1412	0.0351094	-0.0056874
751.68	0.918346	1.73537	-0.522399	2.14999	0.0351488	-0.00570865
751.98	0.941493	1.75078	-0.520361	2.15877	0.0351875	-0.00572981
752.28	0.964836	1.76624	-0.518293	2.16752	0.0352252	-0.00575088
752.59	0.988375	1.78176	-0.516194	2.17625	0.0352621	-0.00577186
752.89	1.01211	1.79734	-0.514064	2.18496	0.0352982	-0.00579275
753.19	1.03605	1.81299	-0.511903	2.19366	0.0353334	-0.00581354
753.5	1.06018	1.82869	-0.50971	2.20233	0.0353676	-0.00583424
753.8	1.08451	1.84446	-0.507487	2.21098	0.0354011	-0.00585485
754.11	1.10904	1.86028	-0.505231	2.21961	0.0354336	-0.00587537
754.41	1.13377	1.87617	-0.502944	2.22822	0.0354653	-0.00589579
754.72	1.15871	1.89212	-0.500626	2.23681	0.0354961	-0.00591612
755.03	1.18384	1.90813	-0.498275	2.24538	0.0355259	-0.00593636
755.34	1.20918	1.92421	-0.495893	2.25393	0.0355549	-0.0059565
755.65	1.23471	1.94034	-0.493478	2.26245	0.0355831	-0.00597654
755.96	1.26045	1.95654	-0.491031	2.27096	0.0356103	-0.0059965
756.27	1.2864	1.9728	-0.488552	2.27945	0.0356366	-0.00601635
756.58	1.31255	1.98912	-0.48604	2.28791	0.035662	-0.00603611
756.89	1.3389	2.00551	-0.483495	2.29636	0.0356865	-0.00605577
757.2	1.36546	2.02195	-0.480918	2.30478	0.03571	-0.00607533
757.51	1.39223	2.03846	-0.478307	2.31318	0.0357327	-0.0060948
757.82	1.41921	2.05504	-0.475663	2.32155	0.0357544	-0.00611416
758.13	1.4464	2.07168	-0.472985	2.32991	0.0357751	-0.00613342
758.44	1.4738	2.08838	-0.470274	2.33824	0.0357949	-0.00615258
758.74	1.50141	2.10514	-0.467529	2.34655	0.0358138	-0.00617163
759.05	1.52923	2.12197	-0.464749	2.35483	0.0358316	-0.00619057
759.35	1.55727	2.13886	-0.461936	2.36309	0.0358486	-0.00620941
759.66	1.58552	2.15582	-0.459088	2.37133	0.0358645	-0.00622814
759.96	1.61399	2.17284	-0.456206	2.37954	0.0358794	-0.00624676
760.27	1.64267	2.18992	-0.453288	2.38772	0.0358934	-0.00626527
760.57	1.67158	2.20707	-0.450336	2.39588	0.0359063	-0.00628366
760.88	1.70071	2.22428	-0.447348	2.40401	0.0359182	-0.00630194
761.18	1.73006	2.24156	-0.444325	2.41211	0.0359291	-0.0063201
761.49	1.75963	2.2589	-0.441266	2.42018	0.035939	-0.00633815
761.79	1.78943	2.27631	-0.438172	2.42823	0.0359478	-0.00635608
762.1	1.81945	2.29378	-0.435041	2.43625	0.0359556	-0.00637388
762.41	1.8497	2.31131	-0.431875	2.44424	0.0359623	-0.00639157
762.71	1.88017	2.32892	-0.428672	2.45221	0.035968	-0.00640914
763.02	1.91086	2.34658	-0.425433	2.46014	0.0359727	-0.00642659
763.33	1.94179	2.36432	-0.422157	2.46805	0.0359763	-0.00644392
763.64	1.97294	2.38211	-0.418845	2.47593	0.0359788	-0.00646113
763.94	2.00432	2.39998	-0.415495	2.48378	0.0359802	-0.00647821
764.25	2.03593	2.41791	-0.412109	2.4916	0.0359806	-0.00649517
764.55	2.06778	2.43591	-0.408684	2.49939	0.0359799	-0.006512
764.86	2.09986	2.45397	-0.405223	2.50715	0.035978	-0.0065287
765.16	2.13217	2.4721	-0.401723	2.51488	0.0359751	-0.00654528
765.46	2.16471	2.49029	-0.398185	2.52258	0.0359711	-0.00656173
765.76	2.19749	2.50856	-0.39461	2.53024	0.0359659	-0.00657804
766.06	2.23051	2.52689	-0.390996	2.53788	0.0359596	-0.00659423
766.36	2.26377	2.54528	-0.387343	2.54549	0.0359522	-0.00661028
766.66	2.29726	2.56375	-0.383652	2.55306	0.0359437	-0.0066262
766.96	2.33099	2.58228	-0.379923	2.5606	0.035934	-0.00664199
767.26	2.36497	2.60088	-0.376154	2.56811	0.0359232	-0.00665764
767.56	2.39918	2.61954	-0.372347	2.57558	0.0359112	-0.00667315
767.86	2.43364	2.63827	-0.3685	2.58302	0.0358981	-0.00668852
768.16	2.46835	2.65707	-0.364614	2.59043	0.0358838	-0.00670376
768.45	2.50329	2.67594	-0.360689	2.59781	0.0358684	-0.00671886
768.75	2.53849	2.69488	-0.356724	2.60515	0.0358517	-0.00673382
769.05	2.57393	2.71388	-0.35272	2.61246	0.035834	-0.00674864
769.35	2.60961	2.73295	-0.348676	2.61973	0.035815	-0.00676332
769.65	2.64555	2.75209	-0.344593	2.62697	0.0357948	-0.00677786
769.95	2.68173	2.7713	-0.340469	2.63418	0.0357735	-0.00679226
770.26	2.71816	2.79058	-0.336307	2.64135	0.035751	-0.00680652
770.56	2.75484	2.80992	-0.332104	2.64849	0.0357274	-0.00682063
770.86	2.79177	2.82933	-0.327861	2.65559	0.0357025	-0.00683461
771.17	2.82895	2.84881	-0.323578	2.66266	0.0356764	-0.00684844
771.47	2.86639	2.86836	-0.319255	2.6697	0.0356492	-0.00686212
771.78	2.90408	2.88798	-0.314892	2.6767	0.0356207	-0.00687566
772.08	2.94202	2.90766	-0.310489	2.68366	0.0355911	-0.00688905
772.39	2.98022	2.92742	-0.306045	2.69059	0.0355602	-0.0069023
772.69	3.01868	2.94724	-0.30156	2.69748	0.0355281	-0.00691539
772.99	3.0574	2.96713	-0.297035	2.70433	0.0354947	-0.00692833
773.29	3.09638	2.98709	-0.292469	2.71115	0.0354602	-0.00694113
773.6	3.13562	3.00711	-0.287863	2.71793	0.0354244	-0.00695377
773.9	3.17512	3.02721	-0.283216	2.72467	0.0353874	-0.00696626
774.2	3.21488	3.04737	-0.278528	2.73138	0.0353491	-0.00697859
774.51	3.25491	3.0676	-0.273799	2.73804	0.0353096	-0.00699077
774.81	3.2952	3.0879	-0.26903	2.74467	0.0352689	-0.0070028
775.12	3.33577	3.10827	-0.264219	2.75126	0.0352269	-0.00701466
775.42	3.3766	3.12871	-0.259368	2.75781	0.0351836	-0.00702637
775.73	3.4177	3.14921	-0.254476	2.76432	0.0351391	-0.00703792
776.04	3.45906	3.16978	-0.249542	2.77079	0.0350933	-0.00704931
776.34	3.5007	3.19043	-0.244568	2.77722	0.0350462	-0.00706053
776.65	3.54262	3.21113	-0.239552	2.78361	0.0349979	-0.0070716
776.96	3.5848	3.23191	-0.234496	2.78996	0.0349484	-0.00708251
777.27	3.62725	3.25275	-0.229398	2.79628	0.0348975	-0.00709326
777.59	3.66998	3.27367	-0.22426	2.80255	0.0348454	-0.00710385
777.9	3.71299	3.29465	-0.21908	2.80878	0.034792	-0.00711427
778.22	3.75627	3.3157	-0.21386	2.81498	0.0347374	-0.00712454
778.54	3.79982	3.33682	-0.208598	2.82113	0.0346814	-0.00713464
778.86	3.84365	3.358	-0.203294	2.82724	0.0346242	-0.00714458
779.19	3.88776	3.37925	-0.19795	2.83331	0.0345658	-0.00715436
779.5	3.93215	3.40058	-0.192564	2.83935	0.034506	-0.00716397
779.81	3.97682	3.42197	-0.187137	2.84534	0.034445	-0.00717342
780.12	4.02177	3.44343	-0.181669	2.85129	0.0343827	-0.0071827
780.43	4.06699	3.46495	-0.17616	2.8572	0.0343191	-0.00719182
780.73	4.1125	3.48655	-0.170609	2.86307	0.0342542	-0.00720078
781.04	4.1583	3.50821	-0.165017	2.8689	0.034188	-0.00720957
781.34	4.20437	3.52994	-0.159383	2.8747	0.0341206	-0.0072182
781.64	4.25073	3.55174	-0.153709	2.88045	0.0340519	-0.00722666
781.94	4.29737	3.57361	-0.147994	2.88616	0.0339819	-0.00723496
782.24	4.3443	3.59554	-0.142238	2.89183	0.0339106	-0.00724309
782.55	4.39151	3.61755	-0.136441	2.89746	0.0338381	-0.00725106
782.85	4.43901	3.63962	-0.130603	2.90304	0.0337642	-0.00725886
783.16	4.4868	3.66175	-0.124724	2.90859	0.0336891	-0.0072665
783.47	4.53487	3.68396	-0.118805	2.9141	0.0336128	-0.00727397
783.78	4.58323	3.70623	-0.112845	2.91957	0.0335351	-0.00728128
784.09	4.63189	3.72857	-0.106845	2.925	0.0334562	-0.00728843
784.41	4.68083	3.75098	-0.100805	2.93039	0.0333761	-0.00729541
784.73	4.73005	3.77346	-0.094724	2.93574	0.0332947	-0.00730223
785.06	4.77957	3.796	-0.0886033	2.94105	0.033212	-0.00730888
785.38	4.82938	3.81861	-0.0824426	2.94633	0.0331281	-0.00731538
785.69	4.87948	3.84129	-0.076242	2.95156	0.0330429	-0.00732171
786	4.92988	3.86403	-0.0700016	2.95676	0.0329565	-0.00732787
786.31	4.98056	3.88684	-0.0637213	2.96191	0.0328689	-0.00733388
786.63	5.03155	3.90972	-0.0574012	2.96703	0.0327799	-0.00733972
786.95	5.08282	3.93266	-0.0510414	2.97211	0.0326898	-0.00734539
787.27	5.13439	3.95567	-0.0446417	2.97714	0.0325984	-0.0073509
787.6	5.18626	3.97875	-0.0382023	2.98214	0.0325057	-0.00735625
787.92	5.23843	4.0019	-0.0317233	2.9871	0.0324117	-0.00736143
788.24	5.29089	4.02511	-0.0252046	2.99202	0.0323166	-0.00736644
788.56	5.34365	4.04838	-0.0186465	2.9969	0.0322201	-0.00737129
788.88	5.39672	4.07173	-0.0120488	3.00174	0.0321224	-0.00737597
789.2	5.45009	4.09513	-0.00541165	3.00654	0.0320235	-0.00738048
789.51	5.50376	4.11861	0.00126493	3.0113	0.0319233	-0.00738483
789.83	5.55773	4.14215	0.00798092	3.01601	0.0318218	-0.007389
790.15	5.61201	4.16575	0.0147363	3.02069	0.031719	-0.007393
790.46	5.6666	4.18943	0.0215309	3.02532	0.031615	-0.00739683
790.78	5.72149	4.21316	0.0283649	3.02992	0.0315097	-0.00740049
791.09	5.7767	4.23696	0.0352382	3.03447	0.0314031	-0.00740397
791.41	5.83221	4.26083	0.0421507	3.03898	0.0312953	-0.00740728
791.72	5.88804	4.28476	0.0491023	3.04344	0.0311862	-0.00741042
792.03	5.94417	4.30876	0.056093	3.04787	0.0310758	-0.00741339
792.35	6.00062	4.33282	0.0631227	3.05226	0.0309642	-0.00741618
792.66	6.05738	4.35695	0.0701913	3.0566	0.0308513	-0.0074188
792.97	6.11445	4.38114	0.0772989	3.0609	0.0307371	-0.00742124
793.27	6.17184	4.40539	0.0844454	3.06516	0.0306217	-0.00742351
793.58	6.22955	4.42971	0.091631	3.06937	0.030505	-0.0074256
793.89	6.28757	4.4541	0.0988554	3.07355	0.0303869	-0.00742751
794.2	6.34592	4.47855	0.106119	3.07768	0.0302677	-0.00742925
794.5	6.40458	4.50306	0.113421	3.08176	0.0301471	-0.0074308
794.81	6.46356	4.52763	0.120763	3.08581	0.0300252	-0.00743218
795.12	6.52287	4.55227	0.128144	3.08981	0.0299021	-0.00743337
795.43	6.5825	4.57698	0.135563	3.09376	0.0297776	-0.00743438
795.74	6.64245	4.60175	0.143021	3.09767	0.0296519	-0.00743522
796.05	6.70273	4.62658	0.150518	3.10154	0.0295249	-0.00743587
796.36	6.76334	4.65147	0.158054	3.10537	0.0293965	-0.00743633
796.68	6.82427	4.67643	0.165628	3.10914	0.0292669	-0.00743662
796.99	6.88554	4.70145	0.173241	3.11288	0.029136	-0.00743672
797.31	6.94713	4.72653	0.180892	3.11657	0.0290039	-0.00743663
797.63	7.00905	4.75168	0.188581	3.12021	0.0288704	-0.00743637
797.94	7.07131	4.77689	0.196308	3.12382	0.0287356	-0.00743591
798.26	7.13389	4.80216	0.204072	3.12737	0.0285996	-0.00743527
798.58	7.19681	4.82749	0.211875	3.13088	0.0284623	-0.00743445
798.9	7.26007	4.85288	0.219715	3.13435	0.0283237	-0.00743344
799.22	7.32366	4.87833	0.227592	3.13777	0.0281838	-0.00743225
799.53	7.38758	4.90385	0.235506	3.14115	0.0280427	-0.00743088
799.85	7.45184	4.92942	0.243456	3.14448	0.0279004	-0.00742932
800.16	7.51644	4.95506	0.251443	3.14777	0.0277567	-0.00742758
800.47	7.58137	4.98076	0.259466	3.15102	0.0276119	-0.00742565
800.78	7.64665	5.00651	0.267526	3.15422	0.0274657	-0.00742355
801.11	7.71226	5.03233	0.275621	3.15738	0.0273184	-0.00742125
801.43	7.77822	5.0582	0.283752	3.16049	0.0271698	-0.00741878
801.75	7.84452	5.08413	0.291919	3.16356	0.0270199	-0.00741611
802.07	7.91116	5.11013	0.300122	3.16659	0.0268688	-0.00741326
802.39	7.97815	5.13618	0.30836	3.16957	0.0267164	-0.00741022
802.71	8.04548	5.16229	0.316634	3.1725	0.0265628	-0.007407
803.02	8.11316	5.18845	0.324942	3.17539	0.0264079	-0.00740359
803.34	8.18119	5.21468	0.333286	3.17823	0.0262518	-0.00739998
803.66	8.24957	5.24096	0.341665	3.18103	0.0260945	-0.00739619
803.97	8.3183	5.2673	0.350078	3.18378	0.0259359	-0.00739221
804.29	8.38738	5.2937	0.358525	3.18649	0.0257761	-0.00738805
804.6	8.45682	5.32015	0.367006	3.18915	0.0256151	-0.00738369
804.92	8.52661	5.34666	0.375522	3.19177	0.0254528	-0.00737914
805.23	8.59675	5.37322	0.384071	3.19433	0.0252893	-0.0073744
805.55	8.66725	5.39984	0.392653	3.19686	0.0251246	-0.00736946
805.86	8.73811	5.42652	0.401269	3.19933	0.0249586	-0.00736434
806.17	8.80933	5.45324	0.409919	3.20176	0.0247914	-0.00735902
806.49	8.8809	5.48003	0.418601	3.20415	0.024623	-0.00735351
806.8	8.95284	5.50687	0.427316	3.20648	0.0244534	-0.00734781
807.11	9.02514	5.53376	0.436064	3.20877	0.0242826	-0.00734192
807.42	9.0978	5.56071	0.444844	3.21102	0.0241106	-0.00733583
807.74	9.17082	5.58771	0.453656	3.21322	0.0239373	-0.00732956
808.05	9.24421	5.61476	0.462501	3.21537	0.0237629	-0.00732309
808.36	9.31796	5.64186	0.471377	3.21748	0.0235873	-0.00731643
808.68	9.39208	5.66902	0.480285	3.21954	0.0234104	-0.00730958
808.99	9.46656	5.69624	0.489225	3.22155	0.0232324	-0.00730253
809.3	9.54142	5.7235	0.498196	3.22352	0.0230532	-0.00729529
809.62	9.61664	5.75082	0.507199	3.22544	0.0228727	-0.00728786
809.93	9.69223	5.77818	0.516234	3.22732	0.0226911	-0.00728023
810.24	9.76819	5.80561	0.525299	3.22914	0.0225083	-0.00727241
810.56	9.84453	5.83308	0.534396	3.23093	0.0223243	-0.00726439
810.88	9.92124	5.8606	0.543524	3.23266	0.0221391	-0.00725618
811.19	9.99832	5.88818	0.552683	3.23435	0.0219527	-0.00724778
811.51	10.0758	5.9158	0.561872	3.23599	0.0217651	-0.00723918
811.82	10.1536	5.94348	0.571091	3.23759	0.0215764	-0.00723039
812.14	10.2318	5.97121	0.580341	3.23914	0.0213865	-0.0072214
812.45	10.3104	5.99899	0.58962	3.24065	0.0211954	-0.00721222
812.77	10.3894	6.02681	0.598929	3.24211	0.0210032	-0.00720285
813.08	10.4687	6.05469	0.608268	3.24352	0.0208098	-0.00719328
813.4	10.5484	6.08262	0.617636	3.24489	0.0206153	-0.00718352
813.71	10.6285	6.11059	0.627033	3.24622	0.0204196	-0.00717357
814.02	10.709	6.13862	0.636459	3.2475	0.0202227	-0.00716343
814.33	10.7899	6.16669	0.645913	3.24873	0.0200248	-0.00715309
814.64	10.8711	6.19481	0.655396	3.24992	0.0198257	-0.00714257
814.95	10.9527	6.22298	0.664908	3.25107	0.0196255	-0.00713185
815.26	11.0347	6.2512	0.674447	3.25217	0.0194242	-0.00712095
815.57	11.1171	6.27947	0.684014	3.25323	0.0192217	-0.00710986
815.89	11.1999	6.30778	0.693609	3.25424	0.0190182	-0.00709858
816.2	11.283	6.33615	0.703231	3.25521	0.0188135	-0.00708711
816.51	11.3666	6.36455	0.712881	3.25614	0.0186078	-0.00707545
816.83	11.4505	6.39301	0.722557	3.25703	0.0184009	-0.0070636
817.15	11.5348	6.42151	0.732261	3.25787	0.018193	-0.00705157
817.48	11.6195	6.45006	0.741992	3.25867	0.0179839	-0.00703934
817.8	11.7046	6.47866	0.751749	3.25942	0.0177738	-0.00702692
818.13	11.7901	6.5073	0.761534	3.26013	0.0175626	-0.00701431
818.45	11.876	6.53599	0.771344	3.2608	0.0173502	-0.00700152
818.77	11.9623	6.56473	0.781181	3.26142	0.0171368	-0.00698853
819.09	12.0489	6.59351	0.791044	3.262	0.0169223	-0.00697535
819.41	12.136	6.62233	0.800933	3.26254	0.0167068	-0.00696199
819.72	12.2235	6.6512	0.810847	3.26303	0.0164901	-0.00694843
820.04	12.3113	6.68011	0.820787	3.26348	0.0162724	-0.00693468
820.35	12.3996	6.70907	0.830752	3.26389	0.0160536	-0.00692074
820.69	12.4882	6.73807	0.840742	3.26425	0.0158338	-0.00690661
821.04	12.5773	6.76712	0.850758	3.26457	0.0156129	-0.00689228
821.38	12.6667	6.7962	0.860798	3.26485	0.0153909	-0.00687777
821.73	12.7566	6.82534	0.870863	3.26508	0.0151678	-0.00686306
822.07	12.8468	6.85451	0.880953	3.26527	0.0149437	-0.00684816
822.42	12.9375	6.88373	0.891067	3.26541	0.0147185	-0.00683307
822.76	13.0286	6.91299	0.901205	3.26551	0.0144923	-0.00681779
823.09	13.12	6.94229	0.911368	3.26557	0.0142651	-0.00680231
823.41	13.2119	6.97164	0.921555	3.26559	0.0140368	-0.00678665
823.73	13.3042	7.00103	0.931766	3.26556	0.0138074	-0.0067708
824.04	13.3969	7.03046	0.942	3.2655	0.013577	-0.00675475
824.36	13.49	7.05993	0.952259	3.26538	0.0133456	-0.00673851
824.67	13.5835	7.08944	0.962541	3.26523	0.0131131	-0.00672209
824.99	13.6774	7.119	0.972846	3.26503	0.0128796	-0.00670546
825.31	13.7717	7.1486	0.983176	3.26479	0.012645	-0.00668865
825.64	13.8665	7.17823	0.993529	3.26451	0.0124094	-0.00667164
825.97	13.9616	7.20791	1.00391	3.26418	0.0121728	-0.00665444
826.31	14.0572	7.23763	1.0143	3.26381	0.0119351	-0.00663705
826.65	14.1532	7.26739	1.02473	3.2634	0.0116964	-0.00661946
826.98	14.2496	7.29719	1.03517	3.26295	0.0114567	-0.00660169
827.31	14.3464	7.32703	1.04564	3.26245	0.0112159	-0.00658372
827.63	14.4437	7.35692	1.05613	3.26191	0.0109742	-0.00656556
827.94	14.5413	7.38683	1.06664	3.26133	0.0107315	-0.00654721
828.25	14.6394	7.41679	1.07717	3.26071	0.0104877	-0.00652866
828.56	14.7379	7.44679	1.08773	3.26004	0.010243	-0.00650993
828.88	14.8368	7.47682	1.0983	3.25934	0.00999726	-0.00649101
829.19	14.9362	7.5069	1.1089	3.25859	0.00975056	-0.00647189
829.52	15.0359	7.53701	1.11951	3.2578	0.00950289	-0.00645259
829.85	15.1361	7.56715	1.13015	3.25698	0.00925427	-0.0064331
830.18	15.2367	7.59734	1.14081	3.25611	0.00900469	-0.00641342
830.52	15.3378	7.62756	1.15148	3.2552	0.00875418	-0.00639356
830.86	15.4392	7.65781	1.16218	3.25426	0.00850274	-0.00637351
831.2	15.5411	7.68811	1.17289	3.25327	0.00825038	-0.00635328
831.54	15.6434	7.71843	1.18362	3.25224	0.0079971	-0.00633287
831.89	15.7462	7.74879	1.19437	3.25118	0.00774292	-0.00631226
832.23	15.8494	7.77919	1.20514	3.25008	0.00748784	-0.00629148
832.58	15.953	7.80962	1.21592	3.24894	0.00723186	-0.00627051
832.94	16.057	7.84008	1.22672	3.24776	0.006975	-0.00624936
833.29	16.1614	7.87058	1.23754	3.24654	0.00671725	-0.00622803
833.64	16.2663	7.90111	1.24838	3.24529	0.00645863	-0.00620652
833.98	16.3717	7.93167	1.25923	3.244	0.00619915	-0.00618482
834.33	16.4774	7.96226	1.27009	3.24267	0.00593881	-0.00616294
834.62	16.5836	7.99288	1.28098	3.2413	0.00567764	-0.00614088
834.82	16.6902	8.02354	1.29187	3.2399	0.00541563	-0.00611864
835.01	16.7973	8.05422	1.30278	3.23846	0.00515281	-0.00609623
835.19	16.9048	8.08493	1.31371	3.23698	0.00488917	-0.00607363
835.37	17.0128	8.11568	1.32464	3.23547	0.00462473	-0.00605086
835.56	17.1211	8.14644	1.33559	3.23392	0.00435951	-0.00602791
835.74	17.23	8.17724	1.34656	3.23234	0.0040935	-0.00600479
835.93	17.3392	8.20807	1.35753	3.23072	0.00382673	-0.00598148
836.11	17.4489	8.23892	1.36852	3.22907	0.00355919	-0.00595801
836.3	17.5591	8.26979	1.37951	3.22738	0.0032909	-0.00593436
836.48	17.6696	8.3007	1.39052	3.22565	0.00302187	-0.00591053
836.66	17.7807	8.33163	1.40154	3.2239	0.0027521	-0.00588653
836.84	17.8921	8.36258	1.41257	3.22211	0.00248162	-0.00586237
837.02	18.0041	8.39356	1.42361	3.22029	0.00221043	-0.00583803
837.2	18.1164	8.42456	1.43466	3.21843	0.00193854	-0.00581352
837.38	18.2292	8.45559	1.44571	3.21654	0.00166595	-0.00578884
837.56	18.3425	8.48664	1.45678	3.21462	0.00139268	-0.005764
837.74	18.4562	8.51771	1.46785	3.21267	0.00111873	-0.00573898
837.92	18.5703	8.5488	1.47894	3.21069	0.000844114	-0.0057138
838.1	18.6849	8.57992	1.49003	3.20867	0.000568829	-0.00568846
838.28	18.8	8.61106	1.50112	3.20663	0.000292884	-0.00566294
838.46	18.9155	8.64222	1.51223	3.20455	1.62902e-05	-0.00563726
838.64	19.0314	8.6734	1.52334	3.20244	-0.000260944	-0.00561142
838.82	19.1478	8.70461	1.53446	3.20031	-0.000538804	-0.00558541
839.01	19.2647	8.73583	1.54559	3.19814	-0.000817278	-0.00555924
839.19	19.382	8.76708	1.55672	3.19595	-0.00109636	-0.00553291
839.38	19.4997	8.79834	1.56785	3.19372	-0.00137602	-0.00550642
839.56	19.6179	8.82962	1.57899	3.19147	-0.00165627	-0.00547977
839.74	19.7366	8.86092	1.59014	3.18919	-0.00193707	-0.00545297
839.92	19.8557	8.89224	1.60129	3.18689	-0.00221842	-0.005426
840.1	19.9753	8.92357	1.61244	3.18455	-0.00250031	-0.00539888
840.28	20.0953	8.95492	1.62359	3.18219	-0.00278272	-0.00537161
840.45	20.2158	8.98629	1.63475	3.17981	-0.00306565	-0.00534419
840.63	20.3367	9.01767	1.64591	3.1774	-0.00334909	-0.00531661
840.81	20.4581	9.04907	1.65707	3.17497	-0.003633	-0.00528888
840.98	20.58	9.08049	1.66823	3.17251	-0.00391739	-0.00526101
841.16	20.7023	9.11191	1.67939	3.17003	-0.00420224	-0.00523298
841.33	20.8251	9.14335	1.69055	3.16752	-0.00448753	-0.00520482
841.51	20.9483	9.17481	1.70171	3.16499	-0.00477326	-0.0051765
841.68	21.072	9.20627	1.71287	3.16244	-0.00505942	-0.00514805
841.86	21.1962	9.23775	1.72403	3.15987	-0.00534598	-0.00511945
842.04	21.3208	9.26924	1.73518	3.15728	-0.00563295	-0.0050907
842.22	21.4458	9.30074	1.74634	3.15467	-0.00592031	-0.00506182
842.39	21.5714	9.33225	1.75749	3.15203	-0.00620806	-0.00503279
842.57	21.6974	9.36377	1.76864	3.14937	-0.00649619	-0.00500363
842.76	21.8239	9.3953	1.77978	3.1467	-0.00678469	-0.00497432
842.94	21.9508	9.42685	1.79093	3.144	-0.00707356	-0.00494487
843.12	22.0782	9.4584	1.80206	3.14129	-0.00736278	-0.00491529
843.29	22.2061	9.48996	1.8132	3.13855	-0.00765234	-0.00488557
843.44	22.3344	9.52152	1.82433	3.13579	-0.00794223	-0.0048557
843.59	22.4632	9.5531	1.83545	3.13302	-0.00823244	-0.00482571
843.75	22.5925	9.58468	1.84657	3.13023	-0.00852297	-0.00479557
843.9	22.7223	9.61626	1.85768	3.12741	-0.00881381	-0.0047653
844.06	22.8525	9.64785	1.86879	3.12458	-0.00910494	-0.00473489
844.22	22.9832	9.67945	1.87989	3.12173	-0.00939636	-0.00470434
844.39	23.1144	9.71105	1.89098	3.11886	-0.00968807	-0.00467366
844.58	23.246	9.74266	1.90207	3.11597	-0.00998006	-0.00464284
844.75	23.3781	9.77427	1.91314	3.11307	-0.0102723	-0.00461188
844.93	23.5107	9.80588	1.92421	3.11014	-0.0105648	-0.00458079
845.1	23.6438	9.8375	1.93527	3.1072	-0.0108576	-0.00454957
845.27	23.7774	9.86912	1.94633	3.10425	-0.0111506	-0.00451821
845.44	23.9114	9.90074	1.95737	3.10127	-0.0114439	-0.00448672
845.62	24.046	9.93236	1.9684	3.09828	-0.0117374	-0.0044551
845.79	24.181	9.96399	1.97943	3.09527	-0.0120312	-0.00442334
845.97	24.3165	9.99561	1.99045	3.09224	-0.0123251	-0.00439144
846.13	24.4524	10.0272	2.00145	3.08919	-0.0126193	-0.00435941
846.29	24.5889	10.0589	2.01245	3.08613	-0.0129138	-0.00432725
846.44	24.7259	10.0905	2.02343	3.08305	-0.0132084	-0.00429495
846.59	24.8633	10.1221	2.03441	3.07995	-0.0135033	-0.00426251
846.74	25.0013	10.1538	2.04537	3.07684	-0.0137984	-0.00422994
846.89	25.1397	10.1854	2.05633	3.07371	-0.0140937	-0.00419723
847.04	25.2786	10.217	2.06727	3.07056	-0.0143892	-0.00416438
847.19	25.418	10.2486	2.0782	3.06739	-0.014685	-0.0041314
847.35	25.5579	10.2803	2.08912	3.06421	-0.0149809	-0.00409828
847.52	25.6984	10.3119	2.10003	3.061	-0.015277	-0.00406503
847.68	25.8393	10.3435	2.11093	3.05779	-0.0155733	-0.00403164
847.83	25.9807	10.3751	2.12181	3.05455	-0.0158698	-0.00399811
847.98	26.1226	10.4067	2.13268	3.0513	-0.0161664	-0.00396445
848.13	26.265	10.4383	2.14354	3.04803	-0.0164632	-0.00393065
848.28	26.4079	10.4699	2.15438	3.04475	-0.0167601	-0.00389672
848.43	26.5513	10.5015	2.16521	3.04144	-0.0170572	-0.00386266
848.58	26.6952	10.5331	2.17602	3.03813	-0.0173545	-0.00382846
848.73	26.8397	10.5647	2.18682	3.03479	-0.0176518	-0.00379412
848.89	26.9846	10.5962	2.1976	3.03145	-0.0179493	-0.00375966
849.06	27.13	10.6278	2.20837	3.02808	-0.0182468	-0.00372506
849.24	27.276	10.6594	2.21912	3.0247	-0.0185444	-0.00369033
849.41	27.4225	10.6909	2.22985	3.02131	-0.0188422	-0.00365547
849.57	27.5694	10.7224	2.24057	3.0179	-0.01914	-0.00362047
849.74	27.7169	10.754	2.25127	3.01448	-0.0194379	-0.00358535
849.9	27.8649	10.7855	2.26195	3.01104	-0.0197358	-0.00355009
850.07	28.0134	10.817	2.27261	3.00759	-0.0200338	-0.0035147
850.25	28.1625	10.8485	2.28325	3.00412	-0.0203319	-0.00347917
850.43	28.312	10.8799	2.29388	3.00064	-0.0206301	-0.00344351
850.59	28.4621	10.9114	2.30448	2.99714	-0.0209283	-0.00340772
850.75	28.6127	10.9429	2.31507	2.99362	-0.0212266	-0.00337179
850.9	28.7638	10.9743	2.32564	2.99009	-0.0215249	-0.00333572
851.05	28.9155	11.0057	2.33619	2.98655	-0.0218233	-0.00329952
851.2	29.0676	11.0372	2.34672	2.98298	-0.0221217	-0.00326318
851.34	29.2203	11.0685	2.35722	2.97941	-0.0224201	-0.00322671
851.48	29.3736	11.0999	2.36771	2.97581	-0.0227186	-0.0031901
851.63	29.5273	11.1313	2.37818	2.9722	-0.0230171	-0.00315335
851.78	29.6816	11.1626	2.38862	2.96858	-0.0233156	-0.00311646
851.93	29.8364	11.194	2.39904	2.96493	-0.0236141	-0.00307944
852.09	29.9918	11.2253	2.40944	2.96127	-0.0239126	-0.00304227
852.24	30.1477	11.2566	2.41982	2.9576	-0.0242112	-0.00300497
852.39	30.3041	11.2879	2.43017	2.95391	-0.0245097	-0.00296753
852.54	30.4611	11.3191	2.44051	2.9502	-0.0248083	-0.00292994
852.68	30.6187	11.3503	2.45081	2.94647	-0.0251068	-0.00289222
852.83	30.7767	11.3816	2.4611	2.94274	-0.0254053	-0.00285437
852.97	30.9353	11.4128	2.47136	2.93898	-0.0257038	-0.00281637
853.11	31.0945	11.4439	2.48159	2.93521	-0.0260022	-0.00277823
853.26	31.2542	11.4751	2.4918	2.93142	-0.0263006	-0.00273996
853.41	31.4144	11.5062	2.50199	2.92762	-0.026599	-0.00270154
853.57	31.5752	11.5373	2.51215	2.9238	-0.0268973	-0.00266299
853.74	31.7366	11.5684	2.52228	2.91996	-0.0271956	-0.00262429
853.91	31.8985	11.5995	2.53239	2.91611	-0.0274938	-0.00258546
854.07	32.0609	11.6305	2.54247	2.91224	-0.027792	-0.00254648
854.23	32.2239	11.6615	2.55253	2.90836	-0.0280901	-0.00250736
854.39	32.3875	11.6925	2.56256	2.90446	-0.0283882	-0.0024681
854.55	32.5516	11.7235	2.57257	2.90054	-0.0286862	-0.0024287
854.71	32.7163	11.7544	2.58254	2.89661	-0.0289841	-0.00238916
854.88	32.8815	11.7853	2.59249	2.89266	-0.029282	-0.00234947
855.06	33.0473	11.8162	2.60242	2.8887	-0.0295797	-0.00230965
855.22	33.2137	11.8471	2.61231	2.88472	-0.0298774	-0.00226968
855.37	33.3806	11.8779	2.62217	2.88073	-0.0301749	-0.00222958
855.52	33.5481	11.9087	2.63201	2.87672	-0.0304724	-0.00218933
855.66	33.7162	11.9395	2.64182	2.87269	-0.0307697	-0.00214894
855.8	33.8848	11.9702	2.65159	2.86865	-0.0310669	-0.00210842
855.94	34.054	12.0009	2.66134	2.8646	-0.031364	-0.00206775
856.08	34.2238	12.0316	2.67106	2.86053	-0.0316609	-0.00202694
856.22	34.3941	12.0623	2.68074	2.85644	-0.0319577	-0.001986
856.36	34.565	12.0929	2.6904	2.85235	-0.0322543	-0.00194492
856.5	34.7365	12.1235	2.70002	2.84823	-0.0325507	-0.0019037
856.66	34.9086	12.154	2.70961	2.84411	-0.032847	-0.00186234
856.81	35.0812	12.1846	2.71917	2.83997	-0.033143	-0.00182085
856.96	35.2544	12.215	2.72869	2.83582	-0.0334389	-0.00177922
857.1	35.4282	12.2455	2.73819	2.83166	-0.0337345	-0.00173746
857.24	35.6025	12.2759	2.74765	2.82748	-0.03403	-0.00169555
857.37	35.7775	12.3063	2.75707	2.82329	-0.0343252	-0.00165351
857.51	35.953	12.3367	2.76646	2.81909	-0.0346203	-0.00161134
857.65	36.1291	12.367	2.77582	2.81487	-0.0349151	-0.00156902
857.79	36.3058	12.3973	2.78515	2.81064	-0.0352098	-0.00152656
857.93	36.4831	12.4275	2.79444	2.8064	-0.0355042	-0.00148396
858.08	36.661	12.4577	2.80369	2.80214	-0.0357984	-0.00144121
858.24	36.8394	12.4879	2.81292	2.79786	-0.0360924	-0.00139833
858.4	37.0185	12.518	2.8221	2.79358	-0.0363862	-0.0013553
858.56	37.1982	12.5481	2.83125	2.78927	-0.0366798	-0.00131213
858.72	37.3784	12.5782	2.84037	2.78495	-0.0369731	-0.00126882
858.88	37.5593	12.6082	2.84945	2.78062	-0.0372663	-0.00122535
859.03	37.7407	12.6382	2.85849	2.77627	-0.0375592	-0.00118174
859.19	37.9228	12.6681	2.8675	2.7719	-0.0378519	-0.00113798
859.35	38.1054	12.698	2.87647	2.76752	-0.0381444	-0.00109407
859.51	38.2887	12.7279	2.88541	2.76312	-0.0384367	-0.00105001
859.68	38.4725	12.7577	2.89431	2.75871	-0.0387287	-0.0010058
859.84	38.657	12.7875	2.90317	2.75428	-0.0390205	-0.000961437
859.98	38.8421	12.8172	2.912	2.74983	-0.0393121	-0.000916924
860.13	39.0278	12.8469	2.92078	2.74536	-0.0396035	-0.00087226
860.26	39.2141	12.8766	2.92953	2.74088	-0.0398946	-0.000827445
860.4	39.4011	12.9062	2.93825	2.73638	-0.0401855	-0.000782477
860.53	39.5886	12.9357	2.94692	2.73187	-0.0404761	-0.000737354
860.66	39.7768	12.9653	2.95556	2.72733	-0.0407665	-0.000692076
860.8	39.9655	12.9947	2.96416	2.72278	-0.0410567	-0.000646641
860.93	40.155	13.0242	2.97272	2.71821	-0.0413467	-0.000601048
861.07	40.345	13.0535	2.98125	2.71363	-0.0416364	-0.000555297
861.22	40.5356	13.0829	2.98973	2.70902	-0.0419259	-0.000509385
861.37	40.7269	13.1122	2.99818	2.70439	-0.0422152	-0.000463313
861.51	40.9188	13.1414	3.00659	2.69975	-0.0425043	-0.000417078
861.65	41.1114	13.1706	3.01495	2.69509	-0.0427931	-0.000370681
861.79	41.3046	13.1998	3.02328	2.6904	-0.0430817	-0.000324123
861.92	41.4984	13.2289	3.03158	2.6857	-0.04337	-0.000277402
862.05	41.6928	13.258	3.03983	2.68098	-0.0436581	-0.000230517
862.19	41.8879	13.287	3.04804	2.67624	-0.043946	-0.000183467
862.32	42.0837	13.3159	3.05621	2.67148	-0.0442336	-0.000136253
862.46	42.28	13.3449	3.06434	2.6667	-0.044521	-8.88731e-05
862.6	42.4771	13.3737	3.07242	2.66189	-0.044808	-4.13287e-05
862.74	42.6747	13.4025	3.08047	2.65707	-0.0450949	6.38089e-06
862.89	42.873	13.4313	3.08848	2.65223	-0.0453814	5.42554e-05
863.05	43.072	13.46	3.09644	2.64738	-0.0456677	0.000102294
863.21	43.2716	13.4887	3.10436	2.6425	-0.0459536	0.000150497
863.36	43.4718	13.5173	3.11223	2.6376	-0.0462392	0.000198862
863.51	43.6727	13.5458	3.12007	2.63269	-0.0465245	0.000247389
863.66	43.8743	13.5743	3.12785	2.62776	-0.0468095	0.000296077
863.82	44.0765	13.6028	3.1356	2.62281	-0.0470941	0.000344927
863.97	44.2794	13.6312	3.14329	2.61784	-0.0473784	0.000393938
864.13	44.4829	13.6595	3.15095	2.61285	-0.0476623	0.000443112
864.3	44.687	13.6878	3.15855	2.60785	-0.0479458	0.000492448
864.51	44.8919	13.716	3.16611	2.60283	-0.048229	0.000541947
864.77	45.0974	13.7441	3.17362	2.59779	-0.0485118	0.000591609
865.02	45.3035	13.7722	3.18109	2.59273	-0.0487942	0.000641435
865.27	45.5104	13.8003	3.1885	2.58766	-0.0490762	0.000691424
865.5	45.7179	13.8282	3.19587	2.58256	-0.0493579	0.000741578
865.74	45.926	13.8562	3.20319	2.57745	-0.0496391	0.000791895
865.98	46.1348	13.884	3.21046	2.57232	-0.0499199	0.000842374
866.21	46.3443	13.9118	3.21768	2.56718	-0.0502002	0.000893015
866.45	46.5545	13.9395	3.22486	2.56201	-0.0504801	0.000943819
866.69	46.7654	13.9672	3.23198	2.55683	-0.0507596	0.000994785
866.92	46.9769	13.9948	3.23904	2.55164	-0.0510386	0.00104591
867.15	47.1891	14.0223	3.24606	2.54642	-0.0513171	0.0010972
867.36	47.402	14.0498	3.25302	2.54119	-0.0515951	0.00114866
867.58	47.6155	14.0772	3.25993	2.53594	-0.0518726	0.00120027
867.78	47.8298	14.1045	3.26679	2.53068	-0.0521496	0.00125205
867.99	48.0447	14.1318	3.27359	2.5254	-0.0524261	0.00130398
868.2	48.2603	14.1589	3.28034	2.5201	-0.0527021	0.00135608
868.41	48.4766	14.1861	3.28703	2.51479	-0.0529775	0.00140833
868.61	48.6936	14.2131	3.29367	2.50946	-0.0532523	0.00146075
868.81	48.9112	14.2401	3.30025	2.50412	-0.0535266	0.00151332
869.02	49.1296	14.267	3.30677	2.49876	-0.0538003	0.00156604
869.24	49.3486	14.2938	3.31323	2.49339	-0.0540734	0.00161893
869.46	49.5684	14.3206	3.31964	2.48801	-0.0543459	0.00167197
869.68	49.7888	14.3472	3.32599	2.48261	-0.0546177	0.00172516
869.89	50.0099	14.3738	3.33228	2.4772	-0.054889	0.00177852
870.09	50.2318	14.4004	3.33851	2.47177	-0.0551596	0.00183203
870.3	50.4543	14.4268	3.34468	2.46633	-0.0554296	0.0018857
870.51	50.6775	14.4532	3.35079	2.46088	-0.0556989	0.00193952
870.72	50.9014	14.4795	3.35684	2.45541	-0.0559676	0.0019935
870.94	51.126	14.5057	3.36283	2.44993	-0.0562356	0.00204763
871.16	51.3514	14.5318	3.36875	2.44444	-0.0565029	0.00210191
871.38	51.5774	14.5579	3.37462	2.43893	-0.0567694	0.00215634
871.62	51.8041	14.5838	3.38041	2.43342	-0.0570353	0.00221093
871.86	52.0316	14.6097	3.38615	2.42789	-0.0573004	0.00226566
872.09	52.2597	14.6355	3.39182	2.42236	-0.0575647	0.00232054
872.32	52.4886	14.6612	3.39742	2.41681	-0.0578282	0.00237557
872.54	52.7182	14.6869	3.40296	2.41126	-0.0580909	0.00243074
872.77	52.9484	14.7124	3.40842	2.40569	-0.0583528	0.00248606
873.01	53.1794	14.7379	3.41382	2.40012	-0.0586138	0.00254151
873.24	53.4111	14.7632	3.41915	2.39455	-0.058874	0.00259711
873.47	53.6435	14.7885	3.42442	2.38896	-0.0591333	0.00265285
873.68	53.8767	14.8137	3.42961	2.38337	-0.0593917	0.00270872
873.89	54.1105	14.8388	3.43472	2.37778	-0.0596491	0.00276472
874.1	54.3451	14.8638	3.43977	2.37218	-0.0599056	0.00282086
[truncated: 9,874 more rows]
