# Supplementary material for: Numerical Simulation of Dry Granular Flow Impacting a Rigid Wall Using the Discrete Element Method
Source: PLoS One. 2016 Aug 11;11(8):e0160756. doi: 10.1371/journal.pone.0160756 (PMC4981468; doi:10.1371/journal.pone.0160756)
Supplement: S5 File — (XLS) [file pone.0160756.s005.xls]

## Sheet: Sheet1
75	100	100	100	125	100
37.5	98	50	98	62.5	98
30	95	40	95	50	95
26.25	90	35	90	43.75	90
22.5	82	30	82	37.5	82
18.75	69	25	69	31.25	69
15	50	20	50	25	50
11.25	25	15	25	18.75	25
7.5	5	10	5	12.5	5
3.75	0	5	0	6.25	0
