# Supplementary material for: Numerical Simulation of Dry Granular Flow Impacting a Rigid Wall Using the Discrete Element Method
Source: PLoS One. 2016 Aug 11;11(8):e0160756. doi: 10.1371/journal.pone.0160756 (PMC4981468; doi:10.1371/journal.pone.0160756)
Supplement: S6 File — (XLS) [file pone.0160756.s006.xls]

## Sheet: Sheet1
3.359e-06	0.000789222	-1.62297e-05	1.15706e-06	1.78124e-07	1.35197e-06	1.9888e-06
1.3117e-05	0.000788728	-1.62721e-05	1.16977e-06	1.78789e-07	1.35336e-06	1.99233e-06
2.9013e-05	0.000788213	-1.63146e-05	1.18256e-06	1.79456e-07	1.35475e-06	1.99585e-06
5.4904e-05	0.000787679	-1.6357e-05	1.19543e-06	1.80124e-07	1.35611e-06	1.99935e-06
9.708e-05	0.000787123	-1.63995e-05	1.20837e-06	1.80793e-07	1.35746e-06	2.00284e-06
0.00016578	0.000786548	-1.6442e-05	1.2214e-06	1.81464e-07	1.35879e-06	2.00632e-06
0.00027768	0.000785952	-1.64846e-05	1.23451e-06	1.82136e-07	1.36011e-06	2.00979e-06
0.00045996	0.000785335	-1.65272e-05	1.2477e-06	1.8281e-07	1.3614e-06	2.01324e-06
0.00070181	0.000784698	-1.65698e-05	1.26097e-06	1.83485e-07	1.36268e-06	2.01669e-06
0.00094431	0.00078404	-1.66124e-05	1.27433e-06	1.84162e-07	1.36395e-06	2.02012e-06
0.0011868	0.000783361	-1.66551e-05	1.28776e-06	1.8484e-07	1.36519e-06	2.02353e-06
0.0014293	0.000782661	-1.66977e-05	1.30128e-06	1.85519e-07	1.36642e-06	2.02694e-06
0.0016718	0.000781939	-1.67404e-05	1.31487e-06	1.862e-07	1.36763e-06	2.03033e-06
0.0019143	0.000781196	-1.67832e-05	1.32856e-06	1.86882e-07	1.36883e-06	2.03371e-06
0.0021568	0.000780432	-1.6826e-05	1.34232e-06	1.87566e-07	1.37e-06	2.03708e-06
0.0023993	0.000779646	-1.68687e-05	1.35617e-06	1.88251e-07	1.37116e-06	2.04043e-06
0.0026418	0.000778839	-1.69116e-05	1.3701e-06	1.88938e-07	1.3723e-06	2.04377e-06
0.0028843	0.00077801	-1.69544e-05	1.38411e-06	1.89626e-07	1.37342e-06	2.0471e-06
0.0031268	0.000777158	-1.69973e-05	1.39821e-06	1.90315e-07	1.37453e-06	2.05041e-06
0.0033693	0.000776285	-1.70401e-05	1.4124e-06	1.91006e-07	1.37561e-06	2.05371e-06
0.0036118	0.00077539	-1.70831e-05	1.42666e-06	1.91699e-07	1.37668e-06	2.057e-06
0.0038543	0.000774472	-1.7126e-05	1.44102e-06	1.92393e-07	1.37773e-06	2.06027e-06
0.0040969	0.000773532	-1.7169e-05	1.45546e-06	1.93088e-07	1.37875e-06	2.06353e-06
0.0043394	0.000772569	-1.72119e-05	1.46998e-06	1.93785e-07	1.37976e-06	2.06677e-06
0.0045819	0.000771584	-1.72549e-05	1.48459e-06	1.94484e-07	1.38076e-06	2.07e-06
0.0048365	0.000770576	-1.7298e-05	1.49929e-06	1.95184e-07	1.38173e-06	2.07322e-06
0.0050971	0.000769545	-1.7341e-05	1.51407e-06	1.95886e-07	1.38268e-06	2.07642e-06
0.0053577	0.000768491	-1.73841e-05	1.52893e-06	1.9659e-07	1.38361e-06	2.07961e-06
0.0056183	0.000767414	-1.74271e-05	1.54389e-06	1.97295e-07	1.38453e-06	2.08278e-06
0.0058789	0.000766314	-1.74702e-05	1.55893e-06	1.98002e-07	1.38542e-06	2.08594e-06
0.0061416	0.000765191	-1.75133e-05	1.57406e-06	1.98711e-07	1.3863e-06	2.08908e-06
0.0064026	0.000764044	-1.75565e-05	1.58927e-06	1.99422e-07	1.38715e-06	2.09221e-06
0.0066579	0.000762874	-1.75996e-05	1.60457e-06	2.00134e-07	1.38799e-06	2.09532e-06
0.0069005	0.000761681	-1.76428e-05	1.61995e-06	2.00848e-07	1.38881e-06	2.09842e-06
0.007143	0.000760463	-1.7686e-05	1.63543e-06	2.01565e-07	1.3896e-06	2.1015e-06
0.0073855	0.000759222	-1.77292e-05	1.65099e-06	2.02283e-07	1.39038e-06	2.10457e-06
0.007628	0.000757957	-1.77724e-05	1.66664e-06	2.03003e-07	1.39114e-06	2.10762e-06
0.0078705	0.000756668	-1.78156e-05	1.68237e-06	2.03725e-07	1.39187e-06	2.11066e-06
0.008113	0.000755354	-1.78588e-05	1.6982e-06	2.04449e-07	1.39259e-06	2.11368e-06
0.0083555	0.000754017	-1.79021e-05	1.71411e-06	2.05176e-07	1.39329e-06	2.11668e-06
0.0085979	0.000752654	-1.79453e-05	1.73011e-06	2.05904e-07	1.39396e-06	2.11967e-06
0.0088404	0.000751267	-1.79886e-05	1.7462e-06	2.06635e-07	1.39461e-06	2.12264e-06
0.0090829	0.000749855	-1.80318e-05	1.76237e-06	2.07368e-07	1.39525e-06	2.1256e-06
0.0093254	0.000748419	-1.80751e-05	1.77864e-06	2.08103e-07	1.39586e-06	2.12854e-06
0.0095678	0.000746957	-1.81184e-05	1.79499e-06	2.08841e-07	1.39645e-06	2.13146e-06
0.0098103	0.00074547	-1.81617e-05	1.81143e-06	2.09581e-07	1.39702e-06	2.13436e-06
0.010053	0.000743957	-1.8205e-05	1.82796e-06	2.10323e-07	1.39757e-06	2.13725e-06
0.010295	0.000742419	-1.82482e-05	1.84458e-06	2.11068e-07	1.3981e-06	2.14012e-06
0.010538	0.000740855	-1.82915e-05	1.86128e-06	2.11816e-07	1.3986e-06	2.14297e-06
0.01078	0.000739266	-1.83348e-05	1.87808e-06	2.12566e-07	1.39908e-06	2.14581e-06
0.011025	0.00073765	-1.83781e-05	1.89496e-06	2.13319e-07	1.39954e-06	2.14862e-06
0.011285	0.000736009	-1.84214e-05	1.91194e-06	2.14075e-07	1.39998e-06	2.15142e-06
0.011527	0.000734341	-1.84646e-05	1.929e-06	2.14834e-07	1.4004e-06	2.1542e-06
0.011769	0.000732647	-1.85079e-05	1.94615e-06	2.15595e-07	1.4008e-06	2.15697e-06
0.012012	0.000730927	-1.85512e-05	1.96339e-06	2.16359e-07	1.40117e-06	2.15971e-06
0.012254	0.000729181	-1.85944e-05	1.98072e-06	2.17127e-07	1.40152e-06	2.16244e-06
0.012497	0.000727407	-1.86377e-05	1.99814e-06	2.17897e-07	1.40185e-06	2.16514e-06
0.012755	0.000725608	-1.86809e-05	2.01564e-06	2.1867e-07	1.40215e-06	2.16783e-06
0.013015	0.000723781	-1.87242e-05	2.03324e-06	2.19447e-07	1.40244e-06	2.1705e-06
0.013267	0.000721927	-1.87674e-05	2.05092e-06	2.20227e-07	1.4027e-06	2.17315e-06
0.01351	0.000720047	-1.88106e-05	2.06869e-06	2.2101e-07	1.40293e-06	2.17579e-06
0.013758	0.000718139	-1.88538e-05	2.08656e-06	2.21797e-07	1.40315e-06	2.1784e-06
0.014018	0.000716204	-1.8897e-05	2.10451e-06	2.22586e-07	1.40334e-06	2.18099e-06
0.014277	0.000714241	-1.89402e-05	2.12255e-06	2.2338e-07	1.40351e-06	2.18357e-06
0.014536	0.000712251	-1.89834e-05	2.14068e-06	2.24177e-07	1.40366e-06	2.18612e-06
0.014779	0.000710234	-1.90265e-05	2.1589e-06	2.24977e-07	1.40378e-06	2.18866e-06
0.015022	0.000708189	-1.90696e-05	2.1772e-06	2.25781e-07	1.40388e-06	2.19117e-06
0.015282	0.000706116	-1.91127e-05	2.1956e-06	2.26589e-07	1.40395e-06	2.19367e-06
0.015541	0.000704015	-1.91558e-05	2.21408e-06	2.27401e-07	1.404e-06	2.19614e-06
0.0158	0.000701886	-1.91989e-05	2.23266e-06	2.28217e-07	1.40403e-06	2.1986e-06
0.01606	0.000699729	-1.92419e-05	2.25132e-06	2.29036e-07	1.40404e-06	2.20103e-06
0.016304	0.000697544	-1.92849e-05	2.27007e-06	2.2986e-07	1.40402e-06	2.20345e-06
0.016551	0.00069533	-1.93279e-05	2.2889e-06	2.30688e-07	1.40398e-06	2.20584e-06
0.016807	0.000693088	-1.93709e-05	2.30783e-06	2.31521e-07	1.40391e-06	2.20822e-06
0.017049	0.000690817	-1.94138e-05	2.32684e-06	2.32358e-07	1.40382e-06	2.21057e-06
0.017291	0.000688517	-1.94567e-05	2.34594e-06	2.33199e-07	1.40371e-06	2.2129e-06
0.017534	0.000686189	-1.94996e-05	2.36513e-06	2.34045e-07	1.40357e-06	2.21521e-06
0.017776	0.000683832	-1.95424e-05	2.3844e-06	2.34896e-07	1.40341e-06	2.2175e-06
0.018019	0.000681446	-1.95852e-05	2.40376e-06	2.35751e-07	1.40322e-06	2.21977e-06
0.018261	0.000679031	-1.9628e-05	2.42321e-06	2.36612e-07	1.40301e-06	2.22201e-06
0.018503	0.000676587	-1.96708e-05	2.44274e-06	2.37477e-07	1.40278e-06	2.22424e-06
0.018745	0.000674113	-1.97134e-05	2.46236e-06	2.38348e-07	1.40252e-06	2.22644e-06
0.018988	0.00067161	-1.97561e-05	2.48207e-06	2.39223e-07	1.40223e-06	2.22862e-06
0.01923	0.000669078	-1.97987e-05	2.50186e-06	2.40104e-07	1.40192e-06	2.23078e-06
0.019472	0.000666516	-1.98413e-05	2.52174e-06	2.40991e-07	1.40159e-06	2.23292e-06
0.019715	0.000663924	-1.98838e-05	2.5417e-06	2.41882e-07	1.40123e-06	2.23503e-06
0.019957	0.000661302	-1.99263e-05	2.56175e-06	2.4278e-07	1.40085e-06	2.23713e-06
0.020199	0.00065865	-1.99687e-05	2.58188e-06	2.43682e-07	1.40045e-06	2.2392e-06
0.020441	0.000655968	-2.00111e-05	2.6021e-06	2.44591e-07	1.40001e-06	2.24124e-06
0.020683	0.000653256	-2.00535e-05	2.62241e-06	2.45505e-07	1.39956e-06	2.24327e-06
0.020925	0.000650513	-2.00958e-05	2.6428e-06	2.46426e-07	1.39907e-06	2.24527e-06
0.021168	0.000647739	-2.0138e-05	2.66327e-06	2.47352e-07	1.39856e-06	2.24725e-06
0.02141	0.000644935	-2.01802e-05	2.68383e-06	2.48284e-07	1.39803e-06	2.2492e-06
0.021652	0.0006421	-2.02223e-05	2.70448e-06	2.49223e-07	1.39747e-06	2.25113e-06
0.021894	0.000639233	-2.02643e-05	2.72521e-06	2.50167e-07	1.39689e-06	2.25304e-06
0.022136	0.000636335	-2.03063e-05	2.74603e-06	2.51119e-07	1.39628e-06	2.25492e-06
0.022391	0.000633406	-2.03483e-05	2.76693e-06	2.52076e-07	1.39564e-06	2.25678e-06
0.022633	0.000630445	-2.03902e-05	2.78791e-06	2.5304e-07	1.39497e-06	2.25861e-06
0.022875	0.000627452	-2.0432e-05	2.80898e-06	2.54011e-07	1.39428e-06	2.26042e-06
0.023118	0.000624428	-2.04737e-05	2.83013e-06	2.54988e-07	1.39357e-06	2.2622e-06
0.02336	0.000621371	-2.05154e-05	2.85137e-06	2.55973e-07	1.39283e-06	2.26396e-06
0.023602	0.000618283	-2.0557e-05	2.87269e-06	2.56964e-07	1.39206e-06	2.26569e-06
0.023847	0.000615162	-2.05985e-05	2.8941e-06	2.57962e-07	1.39126e-06	2.2674e-06
0.024089	0.000612008	-2.064e-05	2.91559e-06	2.58967e-07	1.39044e-06	2.26908e-06
0.024331	0.000608822	-2.06814e-05	2.93716e-06	2.5998e-07	1.38959e-06	2.27074e-06
0.024573	0.000605603	-2.07227e-05	2.95882e-06	2.61e-07	1.38871e-06	2.27237e-06
0.024815	0.000602352	-2.0764e-05	2.98056e-06	2.62027e-07	1.38781e-06	2.27397e-06
0.025064	0.000599067	-2.08051e-05	3.00239e-06	2.63061e-07	1.38687e-06	2.27555e-06
0.025323	0.000595749	-2.08462e-05	3.0243e-06	2.64104e-07	1.38591e-06	2.2771e-06
0.025581	0.000592398	-2.08872e-05	3.04629e-06	2.65153e-07	1.38493e-06	2.27863e-06
0.02584	0.000589013	-2.09281e-05	3.06837e-06	2.66211e-07	1.38391e-06	2.28013e-06
0.026088	0.000585594	-2.09689e-05	3.09053e-06	2.67276e-07	1.38287e-06	2.2816e-06
0.026333	0.000582141	-2.10097e-05	3.11277e-06	2.68349e-07	1.3818e-06	2.28304e-06
0.026591	0.000578655	-2.10503e-05	3.1351e-06	2.6943e-07	1.3807e-06	2.28446e-06
0.026833	0.000575134	-2.10909e-05	3.15751e-06	2.70519e-07	1.37957e-06	2.28585e-06
0.027079	0.000571579	-2.11313e-05	3.18e-06	2.71617e-07	1.37842e-06	2.28721e-06
0.027337	0.000567989	-2.11717e-05	3.20258e-06	2.72723e-07	1.37723e-06	2.28854e-06
0.027595	0.000564365	-2.1212e-05	3.22524e-06	2.73837e-07	1.37602e-06	2.28984e-06
0.027854	0.000560706	-2.12522e-05	3.24798e-06	2.7496e-07	1.37478e-06	2.29112e-06
0.028103	0.000557011	-2.12922e-05	3.2708e-06	2.76092e-07	1.37351e-06	2.29237e-06
0.028345	0.000553282	-2.13322e-05	3.29371e-06	2.77232e-07	1.37221e-06	2.29358e-06
0.028587	0.000549517	-2.13721e-05	3.31669e-06	2.78382e-07	1.37088e-06	2.29477e-06
0.028828	0.000545717	-2.14118e-05	3.33976e-06	2.7954e-07	1.36952e-06	2.29593e-06
0.02907	0.000541881	-2.14515e-05	3.36291e-06	2.80708e-07	1.36813e-06	2.29706e-06
0.029317	0.00053801	-2.1491e-05	3.38614e-06	2.81886e-07	1.36672e-06	2.29816e-06
0.029561	0.000534103	-2.15304e-05	3.40944e-06	2.83073e-07	1.36527e-06	2.29923e-06
0.029802	0.000530159	-2.15697e-05	3.43283e-06	2.8427e-07	1.36379e-06	2.30027e-06
0.030044	0.00052618	-2.16089e-05	3.45629e-06	2.85477e-07	1.36229e-06	2.30128e-06
0.030297	0.000522164	-2.1648e-05	3.47984e-06	2.86694e-07	1.36075e-06	2.30226e-06
0.030563	0.000518112	-2.16869e-05	3.50346e-06	2.87921e-07	1.35919e-06	2.30321e-06
0.030828	0.000514023	-2.17257e-05	3.52715e-06	2.89158e-07	1.35759e-06	2.30413e-06
0.03109	0.000509898	-2.17644e-05	3.55093e-06	2.90406e-07	1.35597e-06	2.30502e-06
0.031353	0.000505735	-2.1803e-05	3.57478e-06	2.91665e-07	1.35431e-06	2.30587e-06
0.031616	0.000501535	-2.18414e-05	3.59871e-06	2.92934e-07	1.35263e-06	2.30669e-06
0.031878	0.000497298	-2.18797e-05	3.62272e-06	2.94214e-07	1.35091e-06	2.30749e-06
0.032141	0.000493024	-2.19178e-05	3.6468e-06	2.95506e-07	1.34916e-06	2.30825e-06
0.032408	0.000488711	-2.19558e-05	3.67096e-06	2.96808e-07	1.34738e-06	2.30897e-06
0.032679	0.000484361	-2.19937e-05	3.6952e-06	2.98122e-07	1.34557e-06	2.30967e-06
0.032948	0.000479972	-2.20314e-05	3.71951e-06	2.99447e-07	1.34373e-06	2.31033e-06
0.033217	0.000475546	-2.2069e-05	3.74389e-06	3.00784e-07	1.34186e-06	2.31096e-06
0.033485	0.000471081	-2.21064e-05	3.76835e-06	3.02133e-07	1.33996e-06	2.31155e-06
0.033747	0.000466577	-2.21437e-05	3.79288e-06	3.03493e-07	1.33802e-06	2.31211e-06
0.03401	0.000462034	-2.21808e-05	3.81749e-06	3.04866e-07	1.33606e-06	2.31264e-06
0.034277	0.000457453	-2.22177e-05	3.84217e-06	3.06251e-07	1.33406e-06	2.31314e-06
0.034545	0.000452832	-2.22545e-05	3.86692e-06	3.07649e-07	1.33203e-06	2.3136e-06
0.034811	0.000448172	-2.22911e-05	3.89175e-06	3.09059e-07	1.32997e-06	2.31402e-06
0.035073	0.000443472	-2.23276e-05	3.91664e-06	3.10482e-07	1.32787e-06	2.31441e-06
0.03533	0.000438733	-2.23639e-05	3.94161e-06	3.11918e-07	1.32575e-06	2.31477e-06
0.035587	0.000433954	-2.24e-05	3.96665e-06	3.13367e-07	1.32359e-06	2.31508e-06
0.035844	0.000429135	-2.24359e-05	3.99177e-06	3.14829e-07	1.3214e-06	2.31537e-06
0.036101	0.000424276	-2.24717e-05	4.01695e-06	3.16304e-07	1.31917e-06	2.31562e-06
0.036357	0.000419376	-2.25073e-05	4.0422e-06	3.17793e-07	1.31692e-06	2.31583e-06
0.036614	0.000414436	-2.25427e-05	4.06752e-06	3.19296e-07	1.31463e-06	2.31601e-06
0.03687	0.000409456	-2.25779e-05	4.09291e-06	3.20812e-07	1.3123e-06	2.31615e-06
0.037127	0.000404435	-2.2613e-05	4.11837e-06	3.22343e-07	1.30995e-06	2.31625e-06
0.037383	0.000399372	-2.26478e-05	4.1439e-06	3.23887e-07	1.30756e-06	2.31632e-06
0.037638	0.000394269	-2.26825e-05	4.1695e-06	3.25445e-07	1.30514e-06	2.31635e-06
0.037888	0.000389124	-2.27169e-05	4.19517e-06	3.27018e-07	1.30268e-06	2.31634e-06
0.038143	0.000383938	-2.27512e-05	4.2209e-06	3.28605e-07	1.30019e-06	2.3163e-06
0.038399	0.00037871	-2.27853e-05	4.2467e-06	3.30207e-07	1.29767e-06	2.31622e-06
0.038648	0.000373441	-2.28192e-05	4.27258e-06	3.31824e-07	1.29512e-06	2.3161e-06
0.038902	0.000368129	-2.28529e-05	4.29851e-06	3.33455e-07	1.29252e-06	2.31594e-06
0.039149	0.000362776	-2.28864e-05	4.32452e-06	3.35101e-07	1.2899e-06	2.31574e-06
0.039406	0.00035738	-2.29197e-05	4.35059e-06	3.36763e-07	1.28724e-06	2.31551e-06
0.039662	0.000351942	-2.29527e-05	4.37673e-06	3.38439e-07	1.28455e-06	2.31524e-06
0.039918	0.000346461	-2.29856e-05	4.40293e-06	3.40132e-07	1.28182e-06	2.31493e-06
0.040175	0.000340938	-2.30183e-05	4.4292e-06	3.41839e-07	1.27906e-06	2.31458e-06
0.040445	0.000335372	-2.30507e-05	4.45553e-06	3.43563e-07	1.27627e-06	2.31419e-06
0.040715	0.000329763	-2.30829e-05	4.48193e-06	3.45303e-07	1.27343e-06	2.31376e-06
0.040984	0.000324111	-2.31149e-05	4.50839e-06	3.47059e-07	1.27057e-06	2.31329e-06
0.041253	0.000318415	-2.31467e-05	4.53492e-06	3.48831e-07	1.26767e-06	2.31278e-06
0.041522	0.000312676	-2.31783e-05	4.56151e-06	3.50619e-07	1.26474e-06	2.31223e-06
0.041791	0.000306894	-2.32096e-05	4.58816e-06	3.52424e-07	1.26177e-06	2.31165e-06
0.042061	0.000301068	-2.32407e-05	4.61487e-06	3.54246e-07	1.25876e-06	2.31102e-06
0.042331	0.000295198	-2.32716e-05	4.64165e-06	3.56084e-07	1.25572e-06	2.31035e-06
0.042601	0.000289285	-2.33022e-05	4.66848e-06	3.5794e-07	1.25265e-06	2.30964e-06
0.042857	0.000283327	-2.33327e-05	4.69538e-06	3.59813e-07	1.24954e-06	2.30889e-06
0.043113	0.000277325	-2.33628e-05	4.72234e-06	3.61703e-07	1.24639e-06	2.3081e-06
0.043369	0.000271279	-2.33928e-05	4.74935e-06	3.6361e-07	1.24321e-06	2.30727e-06
0.043625	0.000265188	-2.34225e-05	4.77643e-06	3.65536e-07	1.24e-06	2.30639e-06
0.043886	0.000259053	-2.34519e-05	4.80357e-06	3.67479e-07	1.23675e-06	2.30548e-06
0.044154	0.000252872	-2.34811e-05	4.83076e-06	3.6944e-07	1.23346e-06	2.30452e-06
0.044423	0.000246647	-2.35101e-05	4.85802e-06	3.71419e-07	1.23014e-06	2.30352e-06
0.044694	0.000240377	-2.35388e-05	4.88533e-06	3.73416e-07	1.22678e-06	2.30248e-06
0.04496	0.000234061	-2.35672e-05	4.9127e-06	3.75431e-07	1.22338e-06	2.3014e-06
0.045216	0.000227699	-2.35954e-05	4.94013e-06	3.77466e-07	1.21995e-06	2.30027e-06
0.045479	0.000221292	-2.36234e-05	4.96762e-06	3.79518e-07	1.21648e-06	2.2991e-06
0.045748	0.000214839	-2.3651e-05	4.99516e-06	3.8159e-07	1.21298e-06	2.29789e-06
0.046004	0.00020834	-2.36785e-05	5.02276e-06	3.83681e-07	1.20944e-06	2.29663e-06
0.046252	0.000201795	-2.37056e-05	5.05042e-06	3.8579e-07	1.20586e-06	2.29533e-06
0.046505	0.000195203	-2.37325e-05	5.07813e-06	3.8792e-07	1.20224e-06	2.29399e-06
0.046761	0.000188564	-2.37591e-05	5.1059e-06	3.90068e-07	1.19859e-06	2.2926e-06
0.047017	0.000181879	-2.37854e-05	5.13372e-06	3.92237e-07	1.1949e-06	2.29117e-06
0.047273	0.000175147	-2.38115e-05	5.1616e-06	3.94425e-07	1.19118e-06	2.28969e-06
0.04753	0.000168368	-2.38373e-05	5.18954e-06	3.96633e-07	1.18741e-06	2.28817e-06
0.047786	0.000161541	-2.38628e-05	5.21752e-06	3.98861e-07	1.18361e-06	2.2866e-06
0.048042	0.000154667	-2.3888e-05	5.24556e-06	4.01109e-07	1.17977e-06	2.28499e-06
0.048298	0.000147745	-2.39129e-05	5.27366e-06	4.03377e-07	1.1759e-06	2.28333e-06
0.048554	0.000140776	-2.39376e-05	5.3018e-06	4.05666e-07	1.17198e-06	2.28163e-06
0.04881	0.000133758	-2.39619e-05	5.33001e-06	4.07976e-07	1.16803e-06	2.27988e-06
0.049061	0.000126693	-2.3986e-05	5.35826e-06	4.10307e-07	1.16404e-06	2.27808e-06
0.049308	0.000119579	-2.40098e-05	5.38656e-06	4.12658e-07	1.16001e-06	2.27624e-06
0.049554	0.000112417	-2.40333e-05	5.41492e-06	4.1503e-07	1.15595e-06	2.27435e-06
0.049801	0.000105207	-2.40565e-05	5.44333e-06	4.17424e-07	1.15184e-06	2.27242e-06
0.050048	9.79476e-05	-2.40793e-05	5.47179e-06	4.19839e-07	1.1477e-06	2.27044e-06
0.050303	9.06394e-05	-2.41019e-05	5.50031e-06	4.22275e-07	1.14352e-06	2.26841e-06
0.050559	8.32821e-05	-2.41242e-05	5.52887e-06	4.24733e-07	1.1393e-06	2.26633e-06
0.050815	7.58755e-05	-2.41462e-05	5.55749e-06	4.27212e-07	1.13504e-06	2.26421e-06
0.051066	6.84196e-05	-2.41678e-05	5.58615e-06	4.29713e-07	1.13074e-06	2.26204e-06
0.051328	6.09141e-05	-2.41892e-05	5.61487e-06	4.32236e-07	1.1264e-06	2.25982e-06
0.051594	5.33588e-05	-2.42102e-05	5.64364e-06	4.34782e-07	1.12202e-06	2.25755e-06
0.051853	4.57536e-05	-2.4231e-05	5.67245e-06	4.3735e-07	1.11761e-06	2.25524e-06
0.052115	3.80984e-05	-2.42514e-05	5.70132e-06	4.3994e-07	1.11315e-06	2.25287e-06
0.05238	3.03928e-05	-2.42715e-05	5.73023e-06	4.42553e-07	1.10866e-06	2.25046e-06
0.052639	2.26368e-05	-2.42912e-05	5.75919e-06	4.45189e-07	1.10412e-06	2.248e-06
0.052888	1.48302e-05	-2.43107e-05	5.7882e-06	4.47848e-07	1.09955e-06	2.24549e-06
0.053134	6.97277e-06	-2.43298e-05	5.81725e-06	4.5053e-07	1.09493e-06	2.24292e-06
0.05338	-9.35609e-07	-2.43485e-05	5.84636e-06	4.53236e-07	1.09028e-06	2.24031e-06
0.053626	-8.89509e-06	-2.4367e-05	5.8755e-06	4.55965e-07	1.08558e-06	2.23765e-06
0.053872	-1.69058e-05	-2.43851e-05	5.90469e-06	4.58719e-07	1.08085e-06	2.23494e-06
0.054118	-2.4968e-05	-2.44028e-05	5.93393e-06	4.61496e-07	1.07607e-06	2.23218e-06
0.054364	-3.30817e-05	-2.44202e-05	5.96321e-06	4.64298e-07	1.07126e-06	2.22937e-06
0.05461	-4.12471e-05	-2.44373e-05	5.99253e-06	4.67124e-07	1.0664e-06	2.2265e-06
0.054856	-4.94644e-05	-2.4454e-05	6.02189e-06	4.69976e-07	1.06151e-06	2.22359e-06
0.05511	-5.77338e-05	-2.44704e-05	6.05129e-06	4.72852e-07	1.05657e-06	2.22062e-06
0.055368	-6.60553e-05	-2.44864e-05	6.08074e-06	4.75753e-07	1.05159e-06	2.21761e-06
0.055614	-7.44293e-05	-2.4502e-05	6.11022e-06	4.7868e-07	1.04658e-06	2.21454e-06
0.05586	-8.28559e-05	-2.45173e-05	6.13974e-06	4.81632e-07	1.04152e-06	2.21142e-06
0.056106	-9.13353e-05	-2.45322e-05	6.1693e-06	4.8461e-07	1.03642e-06	2.20824e-06
0.056352	-9.98677e-05	-2.45467e-05	6.1989e-06	4.87615e-07	1.03128e-06	2.20501e-06
0.056598	-0.000108453	-2.45608e-05	6.22854e-06	4.90645e-07	1.02609e-06	2.20173e-06
0.056844	-0.000117092	-2.45746e-05	6.25821e-06	4.93702e-07	1.02087e-06	2.1984e-06
0.057101	-0.000125784	-2.4588e-05	6.28792e-06	4.96786e-07	1.0156e-06	2.19502e-06
0.057365	-0.000134531	-2.4601e-05	6.31767e-06	4.99897e-07	1.0103e-06	2.19158e-06
0.057628	-0.000143331	-2.46137e-05	6.34744e-06	5.03034e-07	1.00495e-06	2.18808e-06
0.057887	-0.000152185	-2.46259e-05	6.37725e-06	5.062e-07	9.9956e-07	2.18453e-06
0.058149	-0.000161093	-2.46377e-05	6.4071e-06	5.09393e-07	9.94128e-07	2.18093e-06
0.058408	-0.000170056	-2.46492e-05	6.43697e-06	5.12614e-07	9.88654e-07	2.17727e-06
0.058681	-0.000179074	-2.46602e-05	6.46687e-06	5.15864e-07	9.83137e-07	2.17356e-06
0.058951	-0.000188147	-2.46708e-05	6.49681e-06	5.19142e-07	9.77579e-07	2.16979e-06
0.059213	-0.000197274	-2.4681e-05	6.52677e-06	5.22449e-07	9.71978e-07	2.16596e-06
0.059487	-0.000206457	-2.46908e-05	6.55676e-06	5.25785e-07	9.66335e-07	2.16208e-06
0.059761	-0.000215696	-2.47002e-05	6.58677e-06	5.2915e-07	9.60649e-07	2.15814e-06
0.060015	-0.00022499	-2.47091e-05	6.61682e-06	5.32545e-07	9.54921e-07	2.15415e-06
0.060281	-0.000234339	-2.47176e-05	6.64689e-06	5.35969e-07	9.4915e-07	2.1501e-06
0.060557	-0.000243745	-2.47257e-05	6.67698e-06	5.39424e-07	9.43336e-07	2.14599e-06
0.060832	-0.000253207	-2.47334e-05	6.7071e-06	5.42909e-07	9.37479e-07	2.14183e-06
0.061103	-0.000262725	-2.47406e-05	6.73723e-06	5.46424e-07	9.3158e-07	2.1376e-06
0.061374	-0.0002723	-2.47474e-05	6.7674e-06	5.4997e-07	9.25637e-07	2.13332e-06
0.061645	-0.000281931	-2.47537e-05	6.79758e-06	5.53546e-07	9.19651e-07	2.12898e-06
0.061912	-0.000291619	-2.47596e-05	6.82778e-06	5.57154e-07	9.13622e-07	2.12459e-06
0.062165	-0.000301364	-2.4765e-05	6.85801e-06	5.60793e-07	9.0755e-07	2.12013e-06
0.062432	-0.000311166	-2.477e-05	6.88825e-06	5.64464e-07	9.01434e-07	2.11562e-06
0.062704	-0.000321025	-2.47746e-05	6.91852e-06	5.68166e-07	8.95275e-07	2.11104e-06
0.062978	-0.000330942	-2.47787e-05	6.9488e-06	5.719e-07	8.89072e-07	2.10641e-06
0.063245	-0.000340916	-2.47823e-05	6.9791e-06	5.75666e-07	8.82825e-07	2.10172e-06
0.063508	-0.000350949	-2.47854e-05	7.00942e-06	5.79465e-07	8.76534e-07	2.09697e-06
0.063783	-0.000361039	-2.47881e-05	7.03975e-06	5.83296e-07	8.702e-07	2.09215e-06
0.064058	-0.000371187	-2.47903e-05	7.0701e-06	5.8716e-07	8.63821e-07	2.08728e-06
0.064332	-0.000381394	-2.47921e-05	7.10047e-06	5.91057e-07	8.57398e-07	2.08235e-06
0.064607	-0.000391659	-2.47933e-05	7.13085e-06	5.94987e-07	8.50932e-07	2.07736e-06
0.06488	-0.000401983	-2.47941e-05	7.16124e-06	5.98951e-07	8.44421e-07	2.0723e-06
0.065154	-0.000412366	-2.47944e-05	7.19164e-06	6.0295e-07	8.37865e-07	2.06719e-06
0.065427	-0.000422808	-2.47942e-05	7.22205e-06	6.06982e-07	8.31266e-07	2.06201e-06
0.065701	-0.000433309	-2.47935e-05	7.25247e-06	6.11049e-07	8.24621e-07	2.05677e-06
0.065975	-0.000443869	-2.47923e-05	7.2829e-06	6.1515e-07	8.17933e-07	2.05147e-06
0.066249	-0.000454489	-2.47906e-05	7.31334e-06	6.19287e-07	8.11199e-07	2.04611e-06
0.066522	-0.000465169	-2.47884e-05	7.34378e-06	6.23459e-07	8.04421e-07	2.04068e-06
0.066795	-0.000475909	-2.47857e-05	7.37424e-06	6.27666e-07	7.97598e-07	2.03519e-06
0.067066	-0.000486708	-2.47824e-05	7.40469e-06	6.31909e-07	7.90731e-07	2.02964e-06
0.067337	-0.000497568	-2.47787e-05	7.43515e-06	6.36189e-07	7.83818e-07	2.02402e-06
0.06761	-0.000508488	-2.47744e-05	7.46561e-06	6.40504e-07	7.7686e-07	2.01835e-06
0.06788	-0.000519468	-2.47696e-05	7.49608e-06	6.44856e-07	7.69858e-07	2.0126e-06
0.068153	-0.00053051	-2.47643e-05	7.52654e-06	6.49245e-07	7.6281e-07	2.0068e-06
0.068425	-0.000541612	-2.47584e-05	7.55701e-06	6.53671e-07	7.55717e-07	2.00093e-06
0.068697	-0.000552775	-2.47521e-05	7.58747e-06	6.58135e-07	7.48579e-07	1.99499e-06
0.06897	-0.000564	-2.47451e-05	7.61793e-06	6.62636e-07	7.41395e-07	1.98899e-06
0.069243	-0.000575286	-2.47376e-05	7.64839e-06	6.67175e-07	7.34165e-07	1.98292e-06
0.069506	-0.000586634	-2.47296e-05	7.67885e-06	6.71752e-07	7.2689e-07	1.97679e-06
0.069778	-0.000598043	-2.47211e-05	7.70931e-06	6.76367e-07	7.19569e-07	1.97059e-06
0.070051	-0.000609515	-2.47119e-05	7.73976e-06	6.81021e-07	7.12202e-07	1.96433e-06
0.070325	-0.000621049	-2.47023e-05	7.77021e-06	6.85713e-07	7.04789e-07	1.958e-06
0.070598	-0.000632645	-2.4692e-05	7.80065e-06	6.90445e-07	6.9733e-07	1.95161e-06
0.070871	-0.000644304	-2.46812e-05	7.83108e-06	6.95215e-07	6.89825e-07	1.94514e-06
0.07114	-0.000656026	-2.46698e-05	7.8615e-06	7.00026e-07	6.82273e-07	1.93861e-06
0.07141	-0.000667812	-2.46579e-05	7.89192e-06	7.04876e-07	6.74674e-07	1.93202e-06
0.071683	-0.00067966	-2.46453e-05	7.92233e-06	7.09766e-07	6.67029e-07	1.92535e-06
0.071957	-0.000691572	-2.46322e-05	7.95273e-06	7.14697e-07	6.59337e-07	1.91862e-06
0.07223	-0.000703548	-2.46185e-05	7.98311e-06	7.19668e-07	6.51598e-07	1.91181e-06
0.072503	-0.000715588	-2.46042e-05	8.01349e-06	7.2468e-07	6.43811e-07	1.90494e-06
0.072777	-0.000727692	-2.45894e-05	8.04385e-06	7.29733e-07	6.35978e-07	1.898e-06
0.073049	-0.000739861	-2.45739e-05	8.0742e-06	7.34828e-07	6.28097e-07	1.89099e-06
0.073315	-0.000752094	-2.45578e-05	8.10454e-06	7.39963e-07	6.20168e-07	1.88391e-06
0.073573	-0.000764392	-2.45411e-05	8.13486e-06	7.45141e-07	6.12192e-07	1.87676e-06
0.073838	-0.000776755	-2.45239e-05	8.16517e-06	7.5036e-07	6.04168e-07	1.86954e-06
0.074107	-0.000789183	-2.4506e-05	8.19546e-06	7.55622e-07	5.96097e-07	1.86225e-06
0.074371	-0.000801677	-2.44875e-05	8.22574e-06	7.60926e-07	5.87977e-07	1.85489e-06
0.074644	-0.000814236	-2.44683e-05	8.256e-06	7.66272e-07	5.79809e-07	1.84746e-06
0.074915	-0.000826861	-2.44486e-05	8.28624e-06	7.71662e-07	5.71592e-07	1.83995e-06
0.075186	-0.000839552	-2.44282e-05	8.31647e-06	7.77094e-07	5.63327e-07	1.83238e-06
0.075456	-0.00085231	-2.44072e-05	8.34668e-06	7.82569e-07	5.55014e-07	1.82473e-06
0.075726	-0.000865134	-2.43856e-05	8.37687e-06	7.88088e-07	5.46651e-07	1.81701e-06
0.075991	-0.000878025	-2.43634e-05	8.40704e-06	7.93649e-07	5.38239e-07	1.80922e-06
0.076261	-0.000890983	-2.43405e-05	8.4372e-06	7.99255e-07	5.29779e-07	1.80135e-06
0.076531	-0.000904008	-2.4317e-05	8.46733e-06	8.04905e-07	5.21268e-07	1.79342e-06
0.076801	-0.000917101	-2.42928e-05	8.49745e-06	8.10598e-07	5.12709e-07	1.7854e-06
0.077068	-0.000930261	-2.4268e-05	8.52754e-06	8.16336e-07	5.04099e-07	1.77732e-06
0.077333	-0.00094349	-2.42426e-05	8.55761e-06	8.22119e-07	4.9544e-07	1.76916e-06
0.077592	-0.000956786	-2.42165e-05	8.58766e-06	8.27946e-07	4.86731e-07	1.76093e-06
0.077855	-0.000970151	-2.41897e-05	8.61769e-06	8.33818e-07	4.77971e-07	1.75262e-06
0.078116	-0.000983584	-2.41623e-05	8.64769e-06	8.39736e-07	4.69162e-07	1.74423e-06
0.078385	-0.000997086	-2.41342e-05	8.67767e-06	8.457e-07	4.60302e-07	1.73577e-06
0.078654	-0.00101066	-2.41054e-05	8.70762e-06	8.51709e-07	4.51391e-07	1.72724e-06
0.078923	-0.0010243	-2.4076e-05	8.73755e-06	8.57765e-07	4.4243e-07	1.71863e-06
0.079191	-0.00103801	-2.40459e-05	8.76745e-06	8.63867e-07	4.33418e-07	1.70994e-06
0.079459	-0.00105179	-2.40151e-05	8.79732e-06	8.70015e-07	4.24354e-07	1.70117e-06
0.079728	-0.00106564	-2.39836e-05	8.82717e-06	8.7621e-07	4.1524e-07	1.69233e-06
0.079996	-0.00107956	-2.39515e-05	8.85698e-06	8.82453e-07	4.06074e-07	1.68341e-06
0.080264	-0.00109355	-2.39186e-05	8.88677e-06	8.88743e-07	3.96857e-07	1.67442e-06
0.080529	-0.00110761	-2.38851e-05	8.91652e-06	8.95081e-07	3.87589e-07	1.66534e-06
0.080784	-0.00112174	-2.38508e-05	8.94624e-06	9.01467e-07	3.78269e-07	1.65619e-06
0.081045	-0.00113595	-2.38159e-05	8.97593e-06	9.07901e-07	3.68897e-07	1.64695e-06
0.081312	-0.00115022	-2.37802e-05	9.00558e-06	9.14384e-07	3.59473e-07	1.63764e-06
0.081579	-0.00116457	-2.37438e-05	9.0352e-06	9.20915e-07	3.49996e-07	1.62825e-06
0.081846	-0.00117898	-2.37067e-05	9.06478e-06	9.27495e-07	3.40468e-07	1.61878e-06
0.082113	-0.00119347	-2.36689e-05	9.09433e-06	9.34125e-07	3.30886e-07	1.60923e-06
0.08238	-0.00120804	-2.36303e-05	9.12385e-06	9.40803e-07	3.21252e-07	1.5996e-06
0.082651	-0.00122267	-2.35911e-05	9.15333e-06	9.47532e-07	3.11565e-07	1.58989e-06
0.082924	-0.00123738	-2.35511e-05	9.18277e-06	9.5431e-07	3.01825e-07	1.5801e-06
0.083198	-0.00125216	-2.35103e-05	9.21217e-06	9.61138e-07	2.92031e-07	1.57022e-06
0.083472	-0.00126702	-2.34688e-05	9.24154e-06	9.68016e-07	2.82184e-07	1.56026e-06
0.083745	-0.00128195	-2.34266e-05	9.27087e-06	9.74946e-07	2.72283e-07	1.55023e-06
0.084016	-0.00129695	-2.33836e-05	9.30016e-06	9.81926e-07	2.62328e-07	1.5401e-06
0.084284	-0.00131203	-2.33399e-05	9.3294e-06	9.88957e-07	2.52318e-07	1.5299e-06
0.084556	-0.00132718	-2.32954e-05	9.35861e-06	9.96039e-07	2.42255e-07	1.51961e-06
0.084829	-0.0013424	-2.32502e-05	9.38777e-06	1.00317e-06	2.32137e-07	1.50924e-06
0.085103	-0.00135771	-2.32042e-05	9.41689e-06	1.01036e-06	2.21964e-07	1.49878e-06
0.085376	-0.00137308	-2.31574e-05	9.44597e-06	1.0176e-06	2.11736e-07	1.48824e-06
0.085649	-0.00138854	-2.31098e-05	9.47501e-06	1.02489e-06	2.01453e-07	1.47761e-06
0.085923	-0.00140406	-2.30615e-05	9.504e-06	1.03223e-06	1.91115e-07	1.4669e-06
0.086196	-0.00141967	-2.30124e-05	9.53294e-06	1.03963e-06	1.80722e-07	1.45611e-06
0.086469	-0.00143535	-2.29625e-05	9.56184e-06	1.04708e-06	1.70272e-07	1.44522e-06
0.086723	-0.00145111	-2.29118e-05	9.59069e-06	1.05458e-06	1.59767e-07	1.43425e-06
0.086981	-0.00146694	-2.28603e-05	9.6195e-06	1.06214e-06	1.49207e-07	1.4232e-06
0.087254	-0.00148285	-2.28081e-05	9.64826e-06	1.06974e-06	1.3859e-07	1.41206e-06
0.087527	-0.00149884	-2.2755e-05	9.67697e-06	1.07741e-06	1.27916e-07	1.40083e-06
0.0878	-0.00151491	-2.27011e-05	9.70562e-06	1.08513e-06	1.17187e-07	1.38951e-06
0.088074	-0.00153105	-2.26464e-05	9.73423e-06	1.0929e-06	1.064e-07	1.3781e-06
0.088348	-0.00154727	-2.25909e-05	9.76279e-06	1.10073e-06	9.55572e-08	1.36661e-06
0.088621	-0.00156358	-2.25346e-05	9.7913e-06	1.10861e-06	8.46569e-08	1.35502e-06
0.088895	-0.00157995	-2.24774e-05	9.81976e-06	1.11655e-06	7.36995e-08	1.34335e-06
0.089169	-0.00159641	-2.24195e-05	9.84817e-06	1.12454e-06	6.26846e-08	1.33159e-06
0.089443	-0.00161295	-2.23607e-05	9.87653e-06	1.13259e-06	5.16122e-08	1.31974e-06
0.089716	-0.00162957	-2.23011e-05	9.90483e-06	1.14069e-06	4.0482e-08	1.3078e-06
0.08999	-0.00164626	-2.22406e-05	9.93308e-06	1.14885e-06	2.9294e-08	1.29577e-06
0.090256	-0.00166304	-2.21794e-05	9.96127e-06	1.15707e-06	1.8048e-08	1.28365e-06
0.090523	-0.00167989	-2.21172e-05	9.98941e-06	1.16534e-06	6.74369e-09	1.27143e-06
0.090797	-0.00169683	-2.20543e-05	1.00175e-05	1.17367e-06	-4.619e-09	1.25913e-06
0.09107	-0.00171385	-2.19904e-05	1.00455e-05	1.18206e-06	-1.60403e-08	1.24673e-06
0.091344	-0.00173095	-2.19258e-05	1.00735e-05	1.19051e-06	-2.75203e-08	1.23424e-06
0.091617	-0.00174812	-2.18602e-05	1.01014e-05	1.19901e-06	-3.90592e-08	1.22166e-06
0.091885	-0.00176538	-2.17938e-05	1.01293e-05	1.20757e-06	-5.06571e-08	1.20899e-06
0.092146	-0.00178273	-2.17265e-05	1.0157e-05	1.21619e-06	-6.23142e-08	1.19622e-06
0.092417	-0.00180015	-2.16584e-05	1.01848e-05	1.22486e-06	-7.40306e-08	1.18336e-06
0.09269	-0.00181766	-2.15894e-05	1.02124e-05	1.2336e-06	-8.58065e-08	1.17041e-06
0.092964	-0.00183524	-2.15195e-05	1.02401e-05	1.2424e-06	-9.7642e-08	1.15736e-06
0.093238	-0.00185291	-2.14487e-05	1.02676e-05	1.25125e-06	-1.09537e-07	1.14422e-06
0.093512	-0.00187067	-2.13771e-05	1.02951e-05	1.26016e-06	-1.21492e-07	1.13098e-06
0.093785	-0.0018885	-2.13045e-05	1.03225e-05	1.26914e-06	-1.33507e-07	1.11765e-06
0.094059	-0.00190642	-2.12311e-05	1.03498e-05	1.27817e-06	-1.45583e-07	1.10422e-06
0.094333	-0.00192442	-2.11567e-05	1.03771e-05	1.28727e-06	-1.57718e-07	1.09069e-06
0.094606	-0.00194251	-2.10815e-05	1.04043e-05	1.29642e-06	-1.69915e-07	1.07707e-06
0.09488	-0.00196068	-2.10053e-05	1.04315e-05	1.30564e-06	-1.82172e-07	1.06336e-06
0.095154	-0.00197894	-2.09282e-05	1.04586e-05	1.31491e-06	-1.9449e-07	1.04954e-06
0.095428	-0.00199728	-2.08502e-05	1.04856e-05	1.32425e-06	-2.0687e-07	1.03563e-06
0.095701	-0.0020157	-2.07713e-05	1.05125e-05	1.33365e-06	-2.19311e-07	1.02162e-06
0.095975	-0.00203421	-2.06915e-05	1.05394e-05	1.34311e-06	-2.31813e-07	1.00752e-06
0.096249	-0.0020528	-2.06108e-05	1.05662e-05	1.35263e-06	-2.44378e-07	9.93313e-07
0.096522	-0.00207148	-2.05291e-05	1.0593e-05	1.36222e-06	-2.57005e-07	9.79009e-07
0.096796	-0.00209025	-2.04465e-05	1.06196e-05	1.37186e-06	-2.69694e-07	9.64606e-07
0.09707	-0.0021091	-2.03629e-05	1.06462e-05	1.38157e-06	-2.82445e-07	9.50103e-07
0.097343	-0.00212804	-2.02784e-05	1.06728e-05	1.39134e-06	-2.9526e-07	9.35501e-07
0.097616	-0.00214707	-2.0193e-05	1.06992e-05	1.40118e-06	-3.08137e-07	9.20798e-07
0.09789	-0.00216618	-2.01066e-05	1.07256e-05	1.41108e-06	-3.21078e-07	9.05994e-07
0.098163	-0.00218538	-2.00193e-05	1.07519e-05	1.42104e-06	-3.34082e-07	8.91089e-07
0.098436	-0.00220467	-1.9931e-05	1.07781e-05	1.43106e-06	-3.4715e-07	8.76083e-07
0.098705	-0.00222405	-1.98417e-05	1.08043e-05	1.44115e-06	-3.60282e-07	8.60974e-07
0.098971	-0.00224352	-1.97515e-05	1.08304e-05	1.45131e-06	-3.73479e-07	8.45764e-07
0.099235	-0.00226307	-1.96603e-05	1.08564e-05	1.46152e-06	-3.86739e-07	8.3045e-07
0.099504	-0.00228271	-1.95682e-05	1.08823e-05	1.47181e-06	-4.00064e-07	8.15034e-07
0.099774	-0.00230244	-1.9475e-05	1.09082e-05	1.48215e-06	-4.13454e-07	7.99514e-07
0.10004	-0.00232227	-1.93809e-05	1.0934e-05	1.49256e-06	-4.26909e-07	7.83891e-07
0.10031	-0.00234218	-1.92858e-05	1.09597e-05	1.50304e-06	-4.40429e-07	7.68164e-07
0.10057	-0.00236218	-1.91897e-05	1.09853e-05	1.51358e-06	-4.54014e-07	7.52332e-07
0.10084	-0.00238227	-1.90927e-05	1.10109e-05	1.52419e-06	-4.67665e-07	7.36395e-07
0.10111	-0.00240245	-1.89946e-05	1.10364e-05	1.53487e-06	-4.81382e-07	7.20353e-07
0.10138	-0.00242272	-1.88956e-05	1.10618e-05	1.54561e-06	-4.95165e-07	7.04206e-07
0.10164	-0.00244309	-1.87955e-05	1.10871e-05	1.55641e-06	-5.09015e-07	6.87952e-07
0.10191	-0.00246354	-1.86944e-05	1.11123e-05	1.56728e-06	-5.22931e-07	6.71593e-07
0.10218	-0.00248409	-1.85924e-05	1.11375e-05	1.57822e-06	-5.36913e-07	6.55126e-07
0.10244	-0.00250473	-1.84893e-05	1.11626e-05	1.58923e-06	-5.50963e-07	6.38553e-07
0.10271	-0.00252546	-1.83852e-05	1.11876e-05	1.6003e-06	-5.65081e-07	6.21872e-07
0.10298	-0.00254629	-1.82801e-05	1.12125e-05	1.61144e-06	-5.79265e-07	6.05083e-07
0.10324	-0.0025672	-1.8174e-05	1.12374e-05	1.62265e-06	-5.93518e-07	5.88186e-07
0.10351	-0.00258821	-1.80668e-05	1.12622e-05	1.63392e-06	-6.07838e-07	5.7118e-07
0.10378	-0.00260932	-1.79586e-05	1.12868e-05	1.64526e-06	-6.22226e-07	5.54066e-07
0.10405	-0.00263051	-1.78494e-05	1.13114e-05	1.65667e-06	-6.36683e-07	5.36841e-07
0.10431	-0.00265181	-1.77391e-05	1.1336e-05	1.66815e-06	-6.51208e-07	5.19507e-07
0.10458	-0.00267319	-1.76278e-05	1.13604e-05	1.6797e-06	-6.65803e-07	5.02062e-07
0.10485	-0.00269467	-1.75154e-05	1.13847e-05	1.69132e-06	-6.80466e-07	4.84507e-07
0.10512	-0.00271625	-1.7402e-05	1.1409e-05	1.70301e-06	-6.95198e-07	4.66841e-07
0.10539	-0.00273792	-1.72875e-05	1.14332e-05	1.71476e-06	-7.09999e-07	4.49063e-07
0.10566	-0.00275969	-1.7172e-05	1.14573e-05	1.72659e-06	-7.2487e-07	4.31174e-07
0.10593	-0.00278155	-1.70554e-05	1.14813e-05	1.73849e-06	-7.39811e-07	4.13172e-07
0.1062	-0.00280351	-1.69377e-05	1.15052e-05	1.75046e-06	-7.54821e-07	3.95057e-07
0.10647	-0.00282556	-1.68189e-05	1.1529e-05	1.7625e-06	-7.69902e-07	3.7683e-07
0.10673	-0.00284771	-1.66991e-05	1.15527e-05	1.77461e-06	-7.85052e-07	3.58489e-07
0.107	-0.00286996	-1.65781e-05	1.15763e-05	1.78679e-06	-8.00273e-07	3.40034e-07
0.10727	-0.00289231	-1.64561e-05	1.15999e-05	1.79904e-06	-8.15564e-07	3.21465e-07
0.10754	-0.00291475	-1.6333e-05	1.16233e-05	1.81137e-06	-8.30926e-07	3.02781e-07
0.10781	-0.00293729	-1.62087e-05	1.16467e-05	1.82377e-06	-8.4636e-07	2.83982e-07
0.10807	-0.00295993	-1.60834e-05	1.16699e-05	1.83624e-06	-8.61864e-07	2.65067e-07
0.10834	-0.00298266	-1.59569e-05	1.16931e-05	1.84879e-06	-8.7744e-07	2.46037e-07
0.10861	-0.0030055	-1.58294e-05	1.17161e-05	1.86141e-06	-8.93087e-07	2.26889e-07
0.10888	-0.00302843	-1.57007e-05	1.17391e-05	1.8741e-06	-9.08807e-07	2.07625e-07
0.10915	-0.00305147	-1.55708e-05	1.17619e-05	1.88686e-06	-9.24598e-07	1.88244e-07
0.10941	-0.0030746	-1.54399e-05	1.17847e-05	1.8997e-06	-9.40462e-07	1.68745e-07
0.10968	-0.00309784	-1.53078e-05	1.18073e-05	1.91262e-06	-9.56398e-07	1.49127e-07
0.10995	-0.00312117	-1.51745e-05	1.18299e-05	1.92561e-06	-9.72407e-07	1.29391e-07
0.11022	-0.0031446	-1.50401e-05	1.18523e-05	1.93868e-06	-9.88489e-07	1.09536e-07
0.11048	-0.00316814	-1.49046e-05	1.18747e-05	1.95182e-06	-1.00464e-06	8.95605e-08
0.11075	-0.00319178	-1.47679e-05	1.18969e-05	1.96504e-06	-1.02087e-06	6.94652e-08
0.11102	-0.00321551	-1.463e-05	1.1919e-05	1.97833e-06	-1.03717e-06	4.92494e-08
0.11129	-0.00323935	-1.44909e-05	1.1941e-05	1.99171e-06	-1.05355e-06	2.89126e-08
0.11157	-0.0032633	-1.43507e-05	1.19629e-05	2.00516e-06	-1.07e-06	8.45442e-09
0.11184	-0.00328734	-1.42092e-05	1.19847e-05	2.01868e-06	-1.08652e-06	-1.21257e-08
0.11211	-0.00331149	-1.40666e-05	1.20064e-05	2.03229e-06	-1.10312e-06	-3.28281e-08
0.11238	-0.00333574	-1.39228e-05	1.2028e-05	2.04597e-06	-1.11979e-06	-5.36532e-08
0.11265	-0.00336009	-1.37778e-05	1.20494e-05	2.05973e-06	-1.13654e-06	-7.46014e-08
0.11291	-0.00338455	-1.36316e-05	1.20707e-05	2.07358e-06	-1.15336e-06	-9.56732e-08
0.11318	-0.00340911	-1.34841e-05	1.20919e-05	2.0875e-06	-1.17025e-06	-1.16869e-07
0.11345	-0.00343378	-1.33355e-05	1.2113e-05	2.1015e-06	-1.18723e-06	-1.38189e-07
0.11372	-0.00345855	-1.31856e-05	1.2134e-05	2.11558e-06	-1.20427e-06	-1.59634e-07
0.11399	-0.00348342	-1.30345e-05	1.21549e-05	2.12974e-06	-1.22139e-06	-1.81205e-07
0.11427	-0.0035084	-1.28822e-05	1.21756e-05	2.14398e-06	-1.23859e-06	-2.02901e-07
0.11454	-0.00353348	-1.27286e-05	1.21962e-05	2.1583e-06	-1.25587e-06	-2.24723e-07
0.11481	-0.00355868	-1.25738e-05	1.22167e-05	2.17271e-06	-1.27322e-06	-2.46672e-07
0.11508	-0.00358397	-1.24178e-05	1.22371e-05	2.18719e-06	-1.29064e-06	-2.68747e-07
0.11534	-0.00360937	-1.22605e-05	1.22573e-05	2.20176e-06	-1.30814e-06	-2.9095e-07
0.1156	-0.00363488	-1.21019e-05	1.22774e-05	2.21641e-06	-1.32572e-06	-3.13281e-07
0.11587	-0.0036605	-1.1942e-05	1.22974e-05	2.23114e-06	-1.34338e-06	-3.35741e-07
0.11613	-0.00368622	-1.17809e-05	1.23173e-05	2.24596e-06	-1.36111e-06	-3.58329e-07
0.1164	-0.00371205	-1.16186e-05	1.2337e-05	2.26086e-06	-1.37892e-06	-3.81046e-07
0.11666	-0.00373799	-1.14549e-05	1.23566e-05	2.27584e-06	-1.39681e-06	-4.03893e-07
0.11693	-0.00376404	-1.12899e-05	1.2376e-05	2.29091e-06	-1.41477e-06	-4.2687e-07
0.11719	-0.00379019	-1.11237e-05	1.23954e-05	2.30607e-06	-1.43282e-06	-4.49978e-07
0.11746	-0.00381646	-1.09561e-05	1.24145e-05	2.32131e-06	-1.45094e-06	-4.73217e-07
0.11772	-0.00384283	-1.07872e-05	1.24336e-05	2.33663e-06	-1.46914e-06	-4.96587e-07
0.11799	-0.00386931	-1.0617e-05	1.24525e-05	2.35204e-06	-1.48741e-06	-5.20089e-07
0.11824	-0.0038959	-1.04455e-05	1.24712e-05	2.36754e-06	-1.50577e-06	-5.43724e-07
0.1185	-0.0039226	-1.02727e-05	1.24899e-05	2.38313e-06	-1.5242e-06	-5.67492e-07
0.11875	-0.00394941	-1.00985e-05	1.25083e-05	2.3988e-06	-1.54271e-06	-5.91392e-07
0.11901	-0.00397634	-9.923e-06	1.25267e-05	2.41456e-06	-1.5613e-06	-6.15427e-07
0.11928	-0.00400337	-9.74613e-06	1.25448e-05	2.43041e-06	-1.57997e-06	-6.39596e-07
0.11954	-0.00403051	-9.56791e-06	1.25629e-05	2.44635e-06	-1.59871e-06	-6.63899e-07
0.11981	-0.00405776	-9.38833e-06	1.25807e-05	2.46237e-06	-1.61754e-06	-6.88337e-07
0.12006	-0.00408513	-9.20738e-06	1.25984e-05	2.47849e-06	-1.63645e-06	-7.12911e-07
0.12032	-0.00411261	-9.02505e-06	1.2616e-05	2.4947e-06	-1.65543e-06	-7.37622e-07
0.12059	-0.0041402	-8.84134e-06	1.26334e-05	2.51099e-06	-1.6745e-06	-7.62468e-07
0.12086	-0.0041679	-8.65625e-06	1.26507e-05	2.52738e-06	-1.69364e-06	-7.87452e-07
0.12112	-0.00419571	-8.46977e-06	1.26678e-05	2.54386e-06	-1.71287e-06	-8.12573e-07
0.12139	-0.00422364	-8.2819e-06	1.26847e-05	2.56043e-06	-1.73217e-06	-8.37832e-07
0.12166	-0.00425168	-8.09262e-06	1.27015e-05	2.5771e-06	-1.75156e-06	-8.63229e-07
0.12194	-0.00427984	-7.90193e-06	1.27181e-05	2.59385e-06	-1.77102e-06	-8.88765e-07
0.12221	-0.0043081	-7.70983e-06	1.27345e-05	2.6107e-06	-1.79057e-06	-9.14441e-07
0.12248	-0.00433649	-7.51631e-06	1.27508e-05	2.62764e-06	-1.8102e-06	-9.40256e-07
0.12275	-0.00436499	-7.32136e-06	1.27669e-05	2.64467e-06	-1.82991e-06	-9.66212e-07
0.12303	-0.0043936	-7.12498e-06	1.27829e-05	2.6618e-06	-1.8497e-06	-9.92309e-07
0.1233	-0.00442233	-6.92716e-06	1.27987e-05	2.67902e-06	-1.86957e-06	-1.01855e-06
0.12356	-0.00445117	-6.72789e-06	1.28143e-05	2.69634e-06	-1.88952e-06	-1.04493e-06
0.12383	-0.00448013	-6.52718e-06	1.28298e-05	2.71375e-06	-1.90956e-06	-1.07145e-06
0.1241	-0.00450921	-6.32501e-06	1.2845e-05	2.73126e-06	-1.92968e-06	-1.09811e-06
0.12437	-0.00453841	-6.12137e-06	1.28601e-05	2.74886e-06	-1.94988e-06	-1.12492e-06
0.12464	-0.00456772	-5.91628e-06	1.28751e-05	2.76656e-06	-1.97017e-06	-1.15188e-06
0.1249	-0.00459715	-5.7097e-06	1.28898e-05	2.78436e-06	-1.99054e-06	-1.17897e-06
0.12517	-0.00462669	-5.50165e-06	1.29044e-05	2.80225e-06	-2.01099e-06	-1.20621e-06
0.12543	-0.00465636	-5.29211e-06	1.29188e-05	2.82024e-06	-2.03153e-06	-1.2336e-06
0.1257	-0.00468614	-5.08109e-06	1.29331e-05	2.83832e-06	-2.05215e-06	-1.26113e-06
0.12597	-0.00471605	-4.86856e-06	1.29471e-05	2.8565e-06	-2.07285e-06	-1.28881e-06
0.12624	-0.00474607	-4.65454e-06	1.2961e-05	2.87479e-06	-2.09364e-06	-1.31664e-06
0.12651	-0.00477621	-4.43901e-06	1.29747e-05	2.89317e-06	-2.11451e-06	-1.34461e-06
0.12678	-0.00480647	-4.22197e-06	1.29882e-05	2.91164e-06	-2.13547e-06	-1.37273e-06
0.12705	-0.00483685	-4.00341e-06	1.30015e-05	2.93022e-06	-2.15651e-06	-1.401e-06
0.12731	-0.00486736	-3.78333e-06	1.30147e-05	2.9489e-06	-2.17764e-06	-1.42942e-06
0.12758	-0.00489798	-3.56173e-06	1.30277e-05	2.96768e-06	-2.19886e-06	-1.45799e-06
0.12785	-0.00492873	-3.33859e-06	1.30405e-05	2.98655e-06	-2.22016e-06	-1.4867e-06
0.12812	-0.00495959	-3.11392e-06	1.30531e-05	3.00553e-06	-2.24154e-06	-1.51557e-06
0.12839	-0.00499058	-2.88771e-06	1.30655e-05	3.0246e-06	-2.26302e-06	-1.54459e-06
0.12866	-0.00502169	-2.65994e-06	1.30777e-05	3.04378e-06	-2.28458e-06	-1.57376e-06
0.12893	-0.00505293	-2.43062e-06	1.30898e-05	3.06306e-06	-2.30623e-06	-1.60308e-06
0.1292	-0.00508429	-2.19974e-06	1.31016e-05	3.08244e-06	-2.32796e-06	-1.63255e-06
0.12946	-0.00511577	-1.96729e-06	1.31133e-05	3.10192e-06	-2.34978e-06	-1.66217e-06
0.12973	-0.00514737	-1.73327e-06	1.31248e-05	3.12151e-06	-2.37169e-06	-1.69195e-06
0.12999	-0.0051791	-1.49766e-06	1.3136e-05	3.14119e-06	-2.39369e-06	-1.72189e-06
0.13026	-0.00521096	-1.26047e-06	1.31471e-05	3.16099e-06	-2.41578e-06	-1.75197e-06
0.13053	-0.00524294	-1.02168e-06	1.3158e-05	3.18088e-06	-2.43795e-06	-1.78222e-06
0.13079	-0.00527504	-7.81292e-07	1.31687e-05	3.20088e-06	-2.46022e-06	-1.81261e-06
0.13106	-0.00530727	-5.39294e-07	1.31792e-05	3.22098e-06	-2.48257e-06	-1.84317e-06
0.13132	-0.00533963	-2.9568e-07	1.31895e-05	3.24119e-06	-2.50501e-06	-1.87388e-06
0.13159	-0.00537211	-5.04415e-08	1.31996e-05	3.26151e-06	-2.52754e-06	-1.90474e-06
0.13185	-0.00540472	1.96428e-07	1.32095e-05	3.28193e-06	-2.55016e-06	-1.93577e-06
0.13212	-0.00543745	4.44936e-07	1.32192e-05	3.30245e-06	-2.57287e-06	-1.96695e-06
0.1324	-0.00547032	6.95089e-07	1.32286e-05	3.32309e-06	-2.59566e-06	-1.99829e-06
0.13266	-0.00550331	9.46894e-07	1.32379e-05	3.34383e-06	-2.61855e-06	-2.02979e-06
0.13293	-0.00553643	1.20036e-06	1.3247e-05	3.36468e-06	-2.64153e-06	-2.06145e-06
0.13319	-0.00556967	1.45548e-06	1.32558e-05	3.38564e-06	-2.6646e-06	-2.09327e-06
0.13346	-0.00560305	1.71228e-06	1.32644e-05	3.40671e-06	-2.68776e-06	-2.12525e-06
0.13373	-0.00563656	1.97076e-06	1.32728e-05	3.42788e-06	-2.71101e-06	-2.15739e-06
0.134	-0.00567019	2.23091e-06	1.3281e-05	3.44917e-06	-2.73435e-06	-2.1897e-06
0.13427	-0.00570396	2.49276e-06	1.3289e-05	3.47056e-06	-2.75779e-06	-2.22216e-06
0.13454	-0.00573785	2.7563e-06	1.32968e-05	3.49207e-06	-2.78131e-06	-2.25479e-06
0.13481	-0.00577188	3.02154e-06	1.33044e-05	3.51368e-06	-2.80493e-06	-2.28759e-06
0.13509	-0.00580604	3.28849e-06	1.33117e-05	3.53541e-06	-2.82864e-06	-2.32054e-06
0.13536	-0.00584033	3.55716e-06	1.33188e-05	3.55725e-06	-2.85244e-06	-2.35366e-06
0.13563	-0.00587475	3.82755e-06	1.33257e-05	3.5792e-06	-2.87634e-06	-2.38695e-06
0.1359	-0.0059093	4.09968e-06	1.33323e-05	3.60126e-06	-2.90033e-06	-2.4204e-06
0.13617	-0.00594399	4.37354e-06	1.33388e-05	3.62344e-06	-2.92441e-06	-2.45402e-06
0.13644	-0.0059788	4.64914e-06	1.3345e-05	3.64573e-06	-2.94858e-06	-2.4878e-06
0.13671	-0.00601376	4.9265e-06	1.3351e-05	3.66813e-06	-2.97285e-06	-2.52176e-06
0.13698	-0.00604884	5.2056e-06	1.33567e-05	3.69064e-06	-2.99721e-06	-2.55588e-06
0.13725	-0.00608406	5.48647e-06	1.33622e-05	3.71327e-06	-3.02167e-06	-2.59017e-06
0.13752	-0.00611941	5.7691e-06	1.33675e-05	3.73602e-06	-3.04622e-06	-2.62462e-06
0.13779	-0.0061549	6.05349e-06	1.33726e-05	3.75888e-06	-3.07086e-06	-2.65925e-06
0.13806	-0.00619052	6.33966e-06	1.33774e-05	3.78185e-06	-3.0956e-06	-2.69405e-06
0.13833	-0.00622627	6.6276e-06	1.3382e-05	3.80494e-06	-3.12044e-06	-2.72901e-06
0.1386	-0.00626216	6.91732e-06	1.33863e-05	3.82814e-06	-3.14536e-06	-2.76415e-06
0.13888	-0.00629818	7.20882e-06	1.33904e-05	3.85146e-06	-3.17039e-06	-2.79945e-06
0.13915	-0.00633434	7.5021e-06	1.33943e-05	3.87489e-06	-3.19551e-06	-2.83493e-06
0.13942	-0.00637063	7.79717e-06	1.33979e-05	3.89844e-06	-3.22072e-06	-2.87058e-06
0.1397	-0.00640705	8.09403e-06	1.34012e-05	3.92211e-06	-3.24603e-06	-2.9064e-06
0.13997	-0.00644361	8.39268e-06	1.34044e-05	3.94589e-06	-3.27143e-06	-2.9424e-06
0.14025	-0.0064803	8.69311e-06	1.34072e-05	3.96978e-06	-3.29693e-06	-2.97856e-06
0.14052	-0.00651713	8.99533e-06	1.34099e-05	3.99379e-06	-3.32253e-06	-3.0149e-06
0.14079	-0.00655409	9.29933e-06	1.34123e-05	4.01791e-06	-3.34822e-06	-3.05141e-06
0.14107	-0.00659118	9.60513e-06	1.34144e-05	4.04215e-06	-3.374e-06	-3.0881e-06
0.14134	-0.0066284	9.91271e-06	1.34163e-05	4.0665e-06	-3.39988e-06	-3.12495e-06
0.14161	-0.00666576	1.02221e-05	1.34179e-05	4.09097e-06	-3.42586e-06	-3.16198e-06
0.14189	-0.00670325	1.05333e-05	1.34193e-05	4.11555e-06	-3.45193e-06	-3.19919e-06
0.14216	-0.00674087	1.08462e-05	1.34204e-05	4.14025e-06	-3.4781e-06	-3.23657e-06
0.14243	-0.00677863	1.1161e-05	1.34213e-05	4.16506e-06	-3.50437e-06	-3.27412e-06
0.1427	-0.00681651	1.14776e-05	1.34219e-05	4.18999e-06	-3.53073e-06	-3.31185e-06
0.14298	-0.00685453	1.17959e-05	1.34222e-05	4.21503e-06	-3.55718e-06	-3.34976e-06
0.14325	-0.00689268	1.21161e-05	1.34223e-05	4.24019e-06	-3.58374e-06	-3.38784e-06
0.14352	-0.00693097	1.2438e-05	1.34221e-05	4.26546e-06	-3.61038e-06	-3.4261e-06
0.1438	-0.00696938	1.27618e-05	1.34217e-05	4.29084e-06	-3.63713e-06	-3.46453e-06
0.14407	-0.00700792	1.30873e-05	1.34209e-05	4.31634e-06	-3.66397e-06	-3.50314e-06
0.14435	-0.00704659	1.34146e-05	1.342e-05	4.34195e-06	-3.6909e-06	-3.54192e-06
0.14462	-0.00708539	1.37437e-05	1.34187e-05	4.36767e-06	-3.71793e-06	-3.58088e-06
0.14489	-0.00712432	1.40746e-05	1.34172e-05	4.39351e-06	-3.74506e-06	-3.62002e-06
0.14516	-0.00716338	1.44073e-05	1.34154e-05	4.41945e-06	-3.77228e-06	-3.65933e-06
0.14543	-0.00720256	1.47418e-05	1.34133e-05	4.44552e-06	-3.79959e-06	-3.69882e-06
0.1457	-0.00724188	1.5078e-05	1.34109e-05	4.47169e-06	-3.827e-06	-3.73848e-06
0.14597	-0.00728131	1.54161e-05	1.34083e-05	4.49797e-06	-3.85451e-06	-3.77833e-06
0.14623	-0.00732088	1.57559e-05	1.34053e-05	4.52437e-06	-3.88211e-06	-3.81835e-06
0.1465	-0.00736057	1.60974e-05	1.34021e-05	4.55087e-06	-3.9098e-06	-3.85854e-06
0.14677	-0.00740038	1.64408e-05	1.33987e-05	4.57749e-06	-3.93759e-06	-3.89892e-06
0.14704	-0.00744032	1.67859e-05	1.33949e-05	4.60422e-06	-3.96548e-06	-3.93947e-06
0.14731	-0.00748039	1.71327e-05	1.33908e-05	4.63105e-06	-3.99346e-06	-3.9802e-06
0.14757	-0.00752058	1.74814e-05	1.33865e-05	4.658e-06	-4.02153e-06	-4.02111e-06
0.14784	-0.00756089	1.78317e-05	1.33818e-05	4.68505e-06	-4.0497e-06	-4.06219e-06
0.14811	-0.00760132	1.81839e-05	1.33769e-05	4.71222e-06	-4.07796e-06	-4.10346e-06
0.14838	-0.00764188	1.85378e-05	1.33717e-05	4.73949e-06	-4.10632e-06	-4.1449e-06
0.14864	-0.00768255	1.88934e-05	1.33662e-05	4.76687e-06	-4.13478e-06	-4.18652e-06
0.14891	-0.00772335	1.92508e-05	1.33604e-05	4.79436e-06	-4.16332e-06	-4.22832e-06
0.14918	-0.00776427	1.961e-05	1.33543e-05	4.82195e-06	-4.19197e-06	-4.2703e-06
0.14944	-0.00780531	1.99708e-05	1.33479e-05	4.84965e-06	-4.2207e-06	-4.31245e-06
0.1497	-0.00784647	2.03335e-05	1.33412e-05	4.87746e-06	-4.24954e-06	-4.35479e-06
0.14996	-0.00788775	2.06978e-05	1.33342e-05	4.90538e-06	-4.27846e-06	-4.3973e-06
0.15023	-0.00792915	2.10639e-05	1.33269e-05	4.9334e-06	-4.30749e-06	-4.44e-06
0.15049	-0.00797067	2.14317e-05	1.33193e-05	4.96152e-06	-4.3366e-06	-4.48287e-06
0.15075	-0.0080123	2.18012e-05	1.33114e-05	4.98975e-06	-4.36581e-06	-4.52592e-06
0.15102	-0.00805404	2.21724e-05	1.33032e-05	5.01808e-06	-4.39511e-06	-4.56916e-06
0.15128	-0.0080959	2.25453e-05	1.32947e-05	5.04651e-06	-4.42451e-06	-4.61257e-06
0.15154	-0.00813788	2.29199e-05	1.32859e-05	5.07504e-06	-4.454e-06	-4.65615e-06
0.15181	-0.00817996	2.32962e-05	1.32767e-05	5.10368e-06	-4.48358e-06	-4.69992e-06
0.15207	-0.00822216	2.36741e-05	1.32673e-05	5.13241e-06	-4.51326e-06	-4.74387e-06
0.15233	-0.00826447	2.40537e-05	1.32575e-05	5.16124e-06	-4.54303e-06	-4.78799e-06
0.1526	-0.00830689	2.4435e-05	1.32475e-05	5.19017e-06	-4.57289e-06	-4.83229e-06
0.15286	-0.00834942	2.48178e-05	1.32371e-05	5.2192e-06	-4.60284e-06	-4.87678e-06
0.15312	-0.00839205	2.52024e-05	1.32264e-05	5.24832e-06	-4.63289e-06	-4.92144e-06
0.15339	-0.00843479	2.55885e-05	1.32154e-05	5.27754e-06	-4.66303e-06	-4.96627e-06
0.15365	-0.00847763	2.59763e-05	1.32041e-05	5.30685e-06	-4.69326e-06	-5.01129e-06
0.15391	-0.00852058	2.63656e-05	1.31925e-05	5.33625e-06	-4.72358e-06	-5.05648e-06
0.15418	-0.00856364	2.67566e-05	1.31805e-05	5.36575e-06	-4.75399e-06	-5.10185e-06
0.15444	-0.00860679	2.71491e-05	1.31682e-05	5.39534e-06	-4.78449e-06	-5.1474e-06
0.1547	-0.00865005	2.75432e-05	1.31556e-05	5.42502e-06	-4.81509e-06	-5.19312e-06
0.15497	-0.0086934	2.79389e-05	1.31427e-05	5.45478e-06	-4.84577e-06	-5.23903e-06
0.15523	-0.00873686	2.83362e-05	1.31295e-05	5.48464e-06	-4.87655e-06	-5.28511e-06
0.1555	-0.00878041	2.8735e-05	1.31159e-05	5.51459e-06	-4.90742e-06	-5.33137e-06
0.15576	-0.00882406	2.91353e-05	1.3102e-05	5.54463e-06	-4.93838e-06	-5.3778e-06
0.15602	-0.00886781	2.95373e-05	1.30878e-05	5.57475e-06	-4.96942e-06	-5.42442e-06
0.15629	-0.00891166	2.99407e-05	1.30732e-05	5.60496e-06	-5.00056e-06	-5.47121e-06
0.15655	-0.0089556	3.03457e-05	1.30583e-05	5.63526e-06	-5.03179e-06	-5.51817e-06
0.15682	-0.00899963	3.07522e-05	1.30431e-05	5.66564e-06	-5.0631e-06	-5.56532e-06
0.15709	-0.00904375	3.11602e-05	1.30275e-05	5.6961e-06	-5.09451e-06	-5.61264e-06
0.15735	-0.00908797	3.15698e-05	1.30116e-05	5.72665e-06	-5.126e-06	-5.66014e-06
0.15762	-0.00913228	3.19808e-05	1.29953e-05	5.75728e-06	-5.15758e-06	-5.70782e-06
0.15788	-0.00917667	3.23933e-05	1.29787e-05	5.788e-06	-5.18925e-06	-5.75567e-06
0.15814	-0.00922116	3.28073e-05	1.29618e-05	5.81879e-06	-5.22101e-06	-5.8037e-06
0.15841	-0.00926573	3.32228e-05	1.29445e-05	5.84967e-06	-5.25286e-06	-5.85191e-06
0.15867	-0.00931039	3.36398e-05	1.29269e-05	5.88062e-06	-5.28479e-06	-5.90029e-06
0.15893	-0.00935513	3.40582e-05	1.29089e-05	5.91166e-06	-5.31681e-06	-5.94885e-06
0.1592	-0.00939996	3.44781e-05	1.28905e-05	5.94277e-06	-5.34892e-06	-5.99759e-06
0.15946	-0.00944487	3.48994e-05	1.28718e-05	5.97396e-06	-5.38112e-06	-6.0465e-06
0.15972	-0.00948986	3.53222e-05	1.28528e-05	6.00523e-06	-5.4134e-06	-6.09559e-06
0.15999	-0.00953494	3.57464e-05	1.28334e-05	6.03657e-06	-5.44577e-06	-6.14486e-06
0.16025	-0.00958009	3.6172e-05	1.28136e-05	6.06799e-06	-5.47822e-06	-6.1943e-06
0.16051	-0.00962533	3.65991e-05	1.27935e-05	6.09948e-06	-5.51076e-06	-6.24392e-06
0.16078	-0.00967064	3.70275e-05	1.2773e-05	6.13105e-06	-5.54339e-06	-6.29372e-06
0.16104	-0.00971603	3.74574e-05	1.27521e-05	6.16269e-06	-5.5761e-06	-6.34369e-06
0.16131	-0.0097615	3.78886e-05	1.27309e-05	6.1944e-06	-5.6089e-06	-6.39384e-06
0.16157	-0.00980704	3.83213e-05	1.27093e-05	6.22618e-06	-5.64178e-06	-6.44417e-06
0.16183	-0.00985266	3.87554e-05	1.26874e-05	6.25804e-06	-5.67475e-06	-6.49467e-06
0.1621	-0.00989835	3.91908e-05	1.2665e-05	6.28997e-06	-5.7078e-06	-6.54535e-06
0.16236	-0.00994412	3.96276e-05	1.26423e-05	6.32197e-06	-5.74094e-06	-6.59621e-06
0.16262	-0.00998996	4.00658e-05	1.26192e-05	6.35403e-06	-5.77416e-06	-6.64724e-06
0.16289	-0.0100359	4.05053e-05	1.25957e-05	6.38617e-06	-5.80747e-06	-6.69845e-06
0.16315	-0.0100818	4.09462e-05	1.25719e-05	6.41837e-06	-5.84086e-06	-6.74983e-06
0.16342	-0.0101279	4.13884e-05	1.25477e-05	6.45063e-06	-5.87433e-06	-6.80139e-06
0.16368	-0.010174	4.1832e-05	1.25231e-05	6.48297e-06	-5.90788e-06	-6.85313e-06
0.16394	-0.0102202	4.22768e-05	1.2498e-05	6.51536e-06	-5.94152e-06	-6.90504e-06
0.16421	-0.0102664	4.27229e-05	1.24727e-05	6.54782e-06	-5.97524e-06	-6.95712e-06
0.16447	-0.0103127	4.31703e-05	1.24469e-05	6.58034e-06	-6.00904e-06	-7.00938e-06
0.16474	-0.0103591	4.3619e-05	1.24207e-05	6.61291e-06	-6.04292e-06	-7.06181e-06
0.165	-0.0104055	4.40689e-05	1.23941e-05	6.64555e-06	-6.07688e-06	-7.11442e-06
0.16527	-0.0104519	4.45201e-05	1.23672e-05	6.67824e-06	-6.11093e-06	-7.1672e-06
0.16553	-0.0104985	4.49724e-05	1.23398e-05	6.71099e-06	-6.14505e-06	-7.22016e-06
0.1658	-0.010545	4.5426e-05	1.2312e-05	6.74379e-06	-6.17925e-06	-7.27328e-06
0.16606	-0.0105917	4.58807e-05	1.22839e-05	6.77664e-06	-6.21353e-06	-7.32658e-06
0.16632	-0.0106383	4.63366e-05	1.22553e-05	6.80954e-06	-6.24788e-06	-7.38004e-06
0.16659	-0.0106851	4.67936e-05	1.22264e-05	6.84249e-06	-6.28232e-06	-7.43368e-06
0.16685	-0.0107318	4.72518e-05	1.2197e-05	6.87548e-06	-6.31683e-06	-7.48749e-06
0.16711	-0.0107786	4.7711e-05	1.21672e-05	6.90852e-06	-6.35142e-06	-7.54147e-06
0.16738	-0.0108255	4.81714e-05	1.2137e-05	6.94161e-06	-6.38608e-06	-7.59562e-06
0.16765	-0.0108724	4.86328e-05	1.21064e-05	6.97474e-06	-6.42082e-06	-7.64994e-06
0.16792	-0.0109193	4.90953e-05	1.20754e-05	7.00791e-06	-6.45563e-06	-7.70442e-06
0.1682	-0.0109663	4.95589e-05	1.20439e-05	7.04112e-06	-6.49052e-06	-7.75908e-06
0.16846	-0.0110132	5.00235e-05	1.20121e-05	7.07437e-06	-6.52548e-06	-7.8139e-06
0.16873	-0.0110603	5.04891e-05	1.19798e-05	7.10766e-06	-6.56052e-06	-7.86889e-06
0.16899	-0.0111073	5.09558e-05	1.19471e-05	7.14099e-06	-6.59563e-06	-7.92405e-06
0.16925	-0.0111544	5.14234e-05	1.1914e-05	7.17435e-06	-6.63081e-06	-7.97938e-06
0.16951	-0.0112015	5.18921e-05	1.18804e-05	7.20774e-06	-6.66606e-06	-8.03487e-06
0.16977	-0.0112487	5.23616e-05	1.18464e-05	7.24117e-06	-6.70138e-06	-8.09053e-06
0.17003	-0.0112958	5.28321e-05	1.1812e-05	7.27462e-06	-6.73677e-06	-8.14635e-06
0.17029	-0.011343	5.33036e-05	1.17772e-05	7.30811e-06	-6.77224e-06	-8.20233e-06
0.17056	-0.0113902	5.37759e-05	1.17419e-05	7.34162e-06	-6.80777e-06	-8.25849e-06
0.17082	-0.0114374	5.42491e-05	1.17061e-05	7.37515e-06	-6.84337e-06	-8.3148e-06
0.17108	-0.0114846	5.47232e-05	1.16699e-05	7.40871e-06	-6.87904e-06	-8.37128e-06
0.17134	-0.0115319	5.51981e-05	1.16333e-05	7.44229e-06	-6.91478e-06	-8.42792e-06
0.1716	-0.0115791	5.56739e-05	1.15963e-05	7.47589e-06	-6.95058e-06	-8.48472e-06
0.17186	-0.0116264	5.61505e-05	1.15587e-05	7.50951e-06	-6.98645e-06	-8.54169e-06
0.17213	-0.0116737	5.66279e-05	1.15208e-05	7.54315e-06	-7.02239e-06	-8.59882e-06
0.17239	-0.0117209	5.71061e-05	1.14824e-05	7.57681e-06	-7.05839e-06	-8.6561e-06
0.17265	-0.0117682	5.75851e-05	1.14435e-05	7.61047e-06	-7.09445e-06	-8.71355e-06
0.1729	-0.0118155	5.80648e-05	1.14042e-05	7.64415e-06	-7.13058e-06	-8.77116e-06
0.17316	-0.0118627	5.85452e-05	1.13644e-05	7.67785e-06	-7.16678e-06	-8.82893e-06
0.17343	-0.01191	5.90264e-05	1.13242e-05	7.71155e-06	-7.20304e-06	-8.88686e-06
0.17369	-0.0119573	5.95082e-05	1.12835e-05	7.74526e-06	-7.23936e-06	-8.94495e-06
0.17395	-0.0120045	5.99908e-05	1.12423e-05	7.77899e-06	-7.27574e-06	-9.00319e-06
0.17421	-0.0120518	6.04741e-05	1.12007e-05	7.81271e-06	-7.31219e-06	-9.0616e-06
0.17447	-0.0120991	6.0958e-05	1.11586e-05	7.84645e-06	-7.3487e-06	-9.12016e-06
0.17474	-0.0121463	6.14427e-05	1.1116e-05	7.88019e-06	-7.38527e-06	-9.17889e-06
0.17502	-0.0121935	6.19279e-05	1.1073e-05	7.91393e-06	-7.4219e-06	-9.23777e-06
0.17529	-0.0122407	6.24139e-05	1.10294e-05	7.94768e-06	-7.4586e-06	-9.29681e-06
0.17556	-0.0122879	6.29004e-05	1.09855e-05	7.98142e-06	-7.49535e-06	-9.35601e-06
0.17582	-0.0123351	6.33875e-05	1.0941e-05	8.01517e-06	-7.53217e-06	-9.41536e-06
0.17609	-0.0123823	6.38752e-05	1.08961e-05	8.04891e-06	-7.56904e-06	-9.47487e-06
0.17635	-0.0124294	6.43635e-05	1.08506e-05	8.08264e-06	-7.60597e-06	-9.53454e-06
0.17661	-0.0124766	6.48523e-05	1.08047e-05	8.11637e-06	-7.64297e-06	-9.59436e-06
0.17688	-0.0125237	6.53416e-05	1.07583e-05	8.1501e-06	-7.68001e-06	-9.65434e-06
0.17715	-0.0125707	6.58315e-05	1.07115e-05	8.18381e-06	-7.71712e-06	-9.71447e-06
0.17743	-0.0126178	6.63218e-05	1.06641e-05	8.21751e-06	-7.75428e-06	-9.77476e-06
0.1777	-0.0126648	6.68127e-05	1.06163e-05	8.2512e-06	-7.7915e-06	-9.8352e-06
0.17797	-0.0127118	6.73039e-05	1.05679e-05	8.28487e-06	-7.82878e-06	-9.8958e-06
0.17825	-0.0127587	6.77957e-05	1.05191e-05	8.31853e-06	-7.86611e-06	-9.95654e-06
0.17852	-0.0128056	6.82878e-05	1.04698e-05	8.35217e-06	-7.90349e-06	-1.00174e-05
0.17879	-0.0128525	6.87804e-05	1.042e-05	8.3858e-06	-7.94093e-06	-1.00785e-05
0.17906	-0.0128993	6.92733e-05	1.03696e-05	8.4194e-06	-7.97843e-06	-1.01397e-05
0.17933	-0.0129461	6.97666e-05	1.03188e-05	8.45298e-06	-8.01598e-06	-1.02011e-05
0.17961	-0.0129929	7.02603e-05	1.02675e-05	8.48653e-06	-8.05358e-06	-1.02626e-05
0.17988	-0.0130396	7.07543e-05	1.02157e-05	8.52006e-06	-8.09123e-06	-1.03242e-05
0.18016	-0.0130862	7.12486e-05	1.01634e-05	8.55357e-06	-8.12894e-06	-1.0386e-05
0.18043	-0.0131328	7.17432e-05	1.01106e-05	8.58704e-06	-8.1667e-06	-1.0448e-05
0.1807	-0.0131794	7.22382e-05	1.00572e-05	8.62049e-06	-8.20451e-06	-1.05101e-05
0.18097	-0.0132259	7.27334e-05	1.00034e-05	8.65391e-06	-8.24237e-06	-1.05723e-05
0.18123	-0.0132723	7.32289e-05	9.94902e-06	8.68729e-06	-8.28028e-06	-1.06348e-05
0.1815	-0.0133187	7.37246e-05	9.89416e-06	8.72064e-06	-8.31825e-06	-1.06973e-05
0.18177	-0.0133651	7.42206e-05	9.83877e-06	8.75396e-06	-8.35626e-06	-1.076e-05
0.18204	-0.0134114	7.47168e-05	9.78287e-06	8.78724e-06	-8.39432e-06	-1.08229e-05
0.18231	-0.0134576	7.52132e-05	9.72645e-06	8.82048e-06	-8.43243e-06	-1.08859e-05
0.18258	-0.0135037	7.57097e-05	9.6695e-06	8.85368e-06	-8.47059e-06	-1.0949e-05
0.18285	-0.0135498	7.62064e-05	9.61203e-06	8.88684e-06	-8.50879e-06	-1.10123e-05
0.18311	-0.0135959	7.67033e-05	9.55403e-06	8.91995e-06	-8.54705e-06	-1.10757e-05
0.18338	-0.0136418	7.72003e-05	9.4955e-06	8.95302e-06	-8.58534e-06	-1.11393e-05
0.18365	-0.0136877	7.76974e-05	9.43644e-06	8.98605e-06	-8.62369e-06	-1.12031e-05
0.18391	-0.0137335	7.81946e-05	9.37685e-06	9.01903e-06	-8.66208e-06	-1.12669e-05
0.18417	-0.0137792	7.86919e-05	9.31672e-06	9.05195e-06	-8.70051e-06	-1.13309e-05
0.18444	-0.0138249	7.91893e-05	9.25605e-06	9.08483e-06	-8.73899e-06	-1.13951e-05
0.18471	-0.0138705	7.96867e-05	9.19485e-06	9.11766e-06	-8.77751e-06	-1.14594e-05
0.18497	-0.013916	8.01842e-05	9.1331e-06	9.15043e-06	-8.81608e-06	-1.15239e-05
0.18524	-0.0139614	8.06817e-05	9.07081e-06	9.18315e-06	-8.85469e-06	-1.15885e-05
0.18551	-0.0140068	8.11792e-05	9.00798e-06	9.21582e-06	-8.89335e-06	-1.16532e-05
0.18578	-0.014052	8.16767e-05	8.9446e-06	9.24843e-06	-8.93204e-06	-1.17181e-05
0.18604	-0.0140972	8.21742e-05	8.88067e-06	9.28097e-06	-8.97079e-06	-1.17831e-05
0.18631	-0.0141423	8.26716e-05	8.8162e-06	9.31346e-06	-9.00957e-06	-1.18483e-05
0.18658	-0.0141873	8.31691e-05	8.75117e-06	9.34589e-06	-9.04839e-06	-1.19136e-05
0.18685	-0.0142322	8.36665e-05	8.68558e-06	9.37826e-06	-9.08726e-06	-1.19791e-05
0.18712	-0.014277	8.41638e-05	8.61944e-06	9.41057e-06	-9.12616e-06	-1.20446e-05
0.18738	-0.0143217	8.4661e-05	8.55274e-06	9.44281e-06	-9.16511e-06	-1.21104e-05
0.18765	-0.0143663	8.51582e-05	8.48548e-06	9.47499e-06	-9.2041e-06	-1.21763e-05
0.18792	-0.0144109	8.56553e-05	8.41765e-06	9.5071e-06	-9.24313e-06	-1.22423e-05
0.18819	-0.0144553	8.61523e-05	8.34926e-06	9.53914e-06	-9.2822e-06	-1.23085e-05
0.18846	-0.0144996	8.66491e-05	8.28031e-06	9.57111e-06	-9.3213e-06	-1.23748e-05
0.18872	-0.0145439	8.71458e-05	8.21078e-06	9.60301e-06	-9.36045e-06	-1.24412e-05
0.18899	-0.014588	8.76422e-05	8.14069e-06	9.63484e-06	-9.39963e-06	-1.25078e-05
0.18926	-0.014632	8.81385e-05	8.07002e-06	9.66659e-06	-9.43886e-06	-1.25745e-05
0.18952	-0.0146759	8.86346e-05	7.99878e-06	9.69826e-06	-9.47811e-06	-1.26414e-05
0.18979	-0.0147197	8.91304e-05	7.92696e-06	9.72986e-06	-9.51741e-06	-1.27084e-05
0.19006	-0.0147634	8.9626e-05	7.85456e-06	9.76137e-06	-9.55673e-06	-1.27755e-05
0.19033	-0.014807	9.01212e-05	7.78158e-06	9.79279e-06	-9.5961e-06	-1.28428e-05
0.1906	-0.0148504	9.06162e-05	7.70801e-06	9.82414e-06	-9.63549e-06	-1.29102e-05
0.19086	-0.0148937	9.11108e-05	7.63386e-06	9.85539e-06	-9.67492e-06	-1.29778e-05
0.19114	-0.0149369	9.16051e-05	7.55913e-06	9.88655e-06	-9.71439e-06	-1.30455e-05
0.19141	-0.01498	9.20989e-05	7.4838e-06	9.91762e-06	-9.75388e-06	-1.31133e-05
0.19167	-0.015023	9.25923e-05	7.40789e-06	9.9486e-06	-9.79341e-06	-1.31812e-05
0.19194	-0.0150658	9.30853e-05	7.33138e-06	9.97947e-06	-9.83296e-06	-1.32493e-05
0.19221	-0.0151084	9.35779e-05	7.25428e-06	1.00102e-05	-9.87255e-06	-1.33175e-05
0.19248	-0.015151	9.40699e-05	7.17659e-06	1.00409e-05	-9.91216e-06	-1.33859e-05
0.19274	-0.0151934	9.45614e-05	7.09829e-06	1.00715e-05	-9.9518e-06	-1.34543e-05
0.19301	-0.0152356	9.50523e-05	7.0194e-06	1.0102e-05	-9.99147e-06	-1.35229e-05
0.19327	-0.0152777	9.55427e-05	6.9399e-06	1.01323e-05	-1.00312e-05	-1.35917e-05
0.19354	-0.0153197	9.60324e-05	6.8598e-06	1.01625e-05	-1.00709e-05	-1.36605e-05
0.19379	-0.0153615	9.65216e-05	6.77908e-06	1.01927e-05	-1.01106e-05	-1.37295e-05
0.19405	-0.0154031	9.701e-05	6.69776e-06	1.02227e-05	-1.01504e-05	-1.37986e-05
0.19432	-0.0154446	9.74979e-05	6.61583e-06	1.02526e-05	-1.01902e-05	-1.38679e-05
0.19459	-0.0154859	9.79849e-05	6.53328e-06	1.02823e-05	-1.023e-05	-1.39372e-05
0.19485	-0.0155271	9.84713e-05	6.45012e-06	1.0312e-05	-1.02698e-05	-1.40067e-05
0.19512	-0.0155681	9.89568e-05	6.36633e-06	1.03415e-05	-1.03097e-05	-1.40763e-05
0.19537	-0.0156089	9.94416e-05	6.28193e-06	1.03709e-05	-1.03496e-05	-1.4146e-05
0.19562	-0.0156496	9.99254e-05	6.1969e-06	1.04002e-05	-1.03894e-05	-1.42159e-05
0.19587	-0.01569	0.000100408	6.11124e-06	1.04293e-05	-1.04294e-05	-1.42858e-05
0.19612	-0.0157303	0.000100891	6.02496e-06	1.04583e-05	-1.04693e-05	-1.43559e-05
0.19639	-0.0157704	0.000101372	5.93804e-06	1.04871e-05	-1.05092e-05	-1.44261e-05
0.19666	-0.0158103	0.000101852	5.85049e-06	1.05158e-05	-1.05492e-05	-1.44964e-05
0.19692	-0.01585	0.000102331	5.76231e-06	1.05443e-05	-1.05891e-05	-1.45668e-05
0.19719	-0.0158895	0.000102809	5.67349e-06	1.05727e-05	-1.06291e-05	-1.46374e-05
0.19746	-0.0159289	0.000103286	5.58403e-06	1.0601e-05	-1.06691e-05	-1.4708e-05
0.19772	-0.015968	0.000103762	5.49392e-06	1.0629e-05	-1.07091e-05	-1.47788e-05
0.19799	-0.0160069	0.000104237	5.40318e-06	1.0657e-05	-1.07491e-05	-1.48496e-05
0.19826	-0.0160456	0.00010471	5.31179e-06	1.06847e-05	-1.07891e-05	-1.49206e-05
0.19853	-0.0160841	0.000105183	5.21975e-06	1.07123e-05	-1.08291e-05	-1.49917e-05
0.19879	-0.0161224	0.000105654	5.12707e-06	1.07398e-05	-1.08691e-05	-1.50629e-05
0.19906	-0.0161604	0.000106124	5.03373e-06	1.07671e-05	-1.09092e-05	-1.51342e-05
0.19933	-0.0161983	0.000106593	4.93974e-06	1.07942e-05	-1.09492e-05	-1.52056e-05
0.1996	-0.0162359	0.00010706	4.84509e-06	1.08211e-05	-1.09893e-05	-1.52771e-05
0.19986	-0.0162733	0.000107527	4.74979e-06	1.08478e-05	-1.10293e-05	-1.53488e-05
0.20013	-0.0163105	0.000107991	4.65382e-06	1.08744e-05	-1.10694e-05	-1.54205e-05
0.2004	-0.0163475	0.000108455	4.5572e-06	1.09008e-05	-1.11094e-05	-1.54923e-05
0.20066	-0.0163842	0.000108917	4.45991e-06	1.09271e-05	-1.11495e-05	-1.55643e-05
0.20093	-0.0164207	0.000109378	4.36196e-06	1.09531e-05	-1.11896e-05	-1.56363e-05
0.2012	-0.0164569	0.000109837	4.26334e-06	1.0979e-05	-1.12296e-05	-1.57084e-05
0.20146	-0.0164929	0.000110295	4.16405e-06	1.10046e-05	-1.12697e-05	-1.57807e-05
0.20173	-0.0165287	0.000110751	4.06409e-06	1.10301e-05	-1.13097e-05	-1.5853e-05
0.202	-0.0165642	0.000111206	3.96345e-06	1.10554e-05	-1.13498e-05	-1.59255e-05
0.20226	-0.0165995	0.000111659	3.86214e-06	1.10805e-05	-1.13898e-05	-1.5998e-05
0.20253	-0.0166345	0.000112111	3.76015e-06	1.11053e-05	-1.14299e-05	-1.60706e-05
0.20279	-0.0166692	0.00011256	3.65748e-06	1.113e-05	-1.14699e-05	-1.61433e-05
0.20305	-0.0167037	0.000113009	3.55413e-06	1.11545e-05	-1.151e-05	-1.62162e-05
0.20331	-0.0167379	0.000113455	3.4501e-06	1.11787e-05	-1.155e-05	-1.62891e-05
0.20357	-0.0167719	0.0001139	3.34537e-06	1.12028e-05	-1.159e-05	-1.63621e-05
0.20384	-0.0168055	0.000114343	3.23997e-06	1.12266e-05	-1.163e-05	-1.64352e-05
0.20411	-0.0168389	0.000114784	3.13387e-06	1.12502e-05	-1.167e-05	-1.65083e-05
0.20438	-0.0168721	0.000115223	3.02708e-06	1.12736e-05	-1.171e-05	-1.65816e-05
0.20464	-0.0169049	0.00011566	2.9196e-06	1.12967e-05	-1.175e-05	-1.6655e-05
0.20491	-0.0169374	0.000116096	2.81142e-06	1.13196e-05	-1.179e-05	-1.67284e-05
0.20517	-0.0169697	0.000116529	2.70254e-06	1.13423e-05	-1.18299e-05	-1.68019e-05
0.20544	-0.0170017	0.000116961	2.59297e-06	1.13648e-05	-1.18698e-05	-1.68755e-05
0.2057	-0.0170333	0.00011739	2.48269e-06	1.1387e-05	-1.19097e-05	-1.69492e-05
0.20597	-0.0170647	0.000117817	2.37171e-06	1.1409e-05	-1.19496e-05	-1.7023e-05
0.20623	-0.0170958	0.000118243	2.26002e-06	1.14308e-05	-1.19895e-05	-1.70968e-05
0.20649	-0.0171265	0.000118666	2.14762e-06	1.14523e-05	-1.20294e-05	-1.71708e-05
0.20676	-0.017157	0.000119087	2.03451e-06	1.14735e-05	-1.20692e-05	-1.72448e-05
0.20702	-0.0171871	0.000119506	1.92069e-06	1.14945e-05	-1.21091e-05	-1.73189e-05
0.20729	-0.0172169	0.000119923	1.80615e-06	1.15153e-05	-1.21489e-05	-1.73931e-05
0.20755	-0.0172464	0.000120337	1.69089e-06	1.15357e-05	-1.21886e-05	-1.74673e-05
0.20782	-0.0172756	0.000120749	1.57491e-06	1.1556e-05	-1.22284e-05	-1.75416e-05
0.20808	-0.0173045	0.000121159	1.4582e-06	1.1576e-05	-1.22681e-05	-1.7616e-05
0.20834	-0.017333	0.000121567	1.34077e-06	1.15957e-05	-1.23078e-05	-1.76905e-05
0.20861	-0.0173612	0.000121972	1.22261e-06	1.16151e-05	-1.23475e-05	-1.77651e-05
0.20887	-0.0173891	0.000122375	1.10371e-06	1.16343e-05	-1.23871e-05	-1.78397e-05
0.20914	-0.0174166	0.000122775	9.84083e-07	1.16532e-05	-1.24268e-05	-1.79144e-05
0.2094	-0.0174438	0.000123173	8.63715e-07	1.16718e-05	-1.24664e-05	-1.79891e-05
0.20967	-0.0174706	0.000123569	7.42608e-07	1.16902e-05	-1.25059e-05	-1.80639e-05
0.20993	-0.0174971	0.000123962	6.20758e-07	1.17082e-05	-1.25455e-05	-1.81388e-05
0.21019	-0.0175232	0.000124352	4.98164e-07	1.1726e-05	-1.2585e-05	-1.82138e-05
0.21046	-0.017549	0.00012474	3.74822e-07	1.17435e-05	-1.26244e-05	-1.82888e-05
0.21072	-0.0175744	0.000125126	2.50731e-07	1.17608e-05	-1.26639e-05	-1.83639e-05
0.21099	-0.0175995	0.000125509	1.25887e-07	1.17777e-05	-1.27033e-05	-1.84391e-05
0.21125	-0.0176242	0.000125889	2.89649e-10	1.17943e-05	-1.27426e-05	-1.85143e-05
0.21152	-0.0176486	0.000126266	-1.26066e-07	1.18107e-05	-1.27819e-05	-1.85896e-05
0.21178	-0.0176725	0.000126641	-2.53182e-07	1.18267e-05	-1.28212e-05	-1.86649e-05
0.21205	-0.0176962	0.000127013	-3.81061e-07	1.18425e-05	-1.28605e-05	-1.87404e-05
0.21231	-0.0177194	0.000127383	-5.09706e-07	1.18579e-05	-1.28997e-05	-1.88158e-05
0.21258	-0.0177423	0.000127749	-6.39119e-07	1.18731e-05	-1.29389e-05	-1.88914e-05
0.21284	-0.0177648	0.000128113	-7.69304e-07	1.1888e-05	-1.29781e-05	-1.8967e-05
0.21311	-0.0177869	0.000128475	-9.00263e-07	1.19025e-05	-1.30172e-05	-1.90426e-05
0.21337	-0.0178086	0.000128833	-1.032e-06	1.19168e-05	-1.30562e-05	-1.91184e-05
0.21362	-0.01783	0.000129189	-1.16451e-06	1.19307e-05	-1.30952e-05	-1.91942e-05
0.2139	-0.0178509	0.000129542	-1.29781e-06	1.19443e-05	-1.31342e-05	-1.927e-05
0.21417	-0.0178715	0.000129892	-1.43189e-06	1.19577e-05	-1.31732e-05	-1.93459e-05
0.21444	-0.0178917	0.000130239	-1.56676e-06	1.19707e-05	-1.32121e-05	-1.94219e-05
0.2147	-0.0179115	0.000130583	-1.70242e-06	1.19833e-05	-1.32509e-05	-1.94979e-05
0.21497	-0.0179309	0.000130924	-1.83888e-06	1.19957e-05	-1.32897e-05	-1.9574e-05
0.21523	-0.0179499	0.000131262	-1.97613e-06	1.20077e-05	-1.33285e-05	-1.96501e-05
0.2155	-0.0179684	0.000131597	-2.11418e-06	1.20195e-05	-1.33672e-05	-1.97263e-05
0.21576	-0.0179866	0.00013193	-2.25303e-06	1.20308e-05	-1.34059e-05	-1.98025e-05
0.21602	-0.0180044	0.000132259	-2.39269e-06	1.20419e-05	-1.34445e-05	-1.98788e-05
0.21629	-0.0180217	0.000132585	-2.53315e-06	1.20526e-05	-1.34831e-05	-1.99552e-05
0.21656	-0.0180386	0.000132907	-2.67443e-06	1.2063e-05	-1.35216e-05	-2.00316e-05
0.21683	-0.0180551	0.000133227	-2.81652e-06	1.2073e-05	-1.35601e-05	-2.0108e-05
0.2171	-0.0180712	0.000133543	-2.95942e-06	1.20827e-05	-1.35985e-05	-2.01845e-05
0.21736	-0.0180869	0.000133856	-3.10314e-06	1.20921e-05	-1.36368e-05	-2.0261e-05
0.21764	-0.0181021	0.000134166	-3.24768e-06	1.2101e-05	-1.36751e-05	-2.03376e-05
0.21791	-0.0181168	0.000134473	-3.39305e-06	1.21097e-05	-1.37134e-05	-2.04142e-05
0.21818	-0.0181312	0.000134776	-3.53924e-06	1.2118e-05	-1.37516e-05	-2.04909e-05
0.21846	-0.0181451	0.000135076	-3.68627e-06	1.21259e-05	-1.37897e-05	-2.05676e-05
0.21873	-0.0181585	0.000135372	-3.83412e-06	1.21335e-05	-1.38278e-05	-2.06443e-05
0.21901	-0.0181715	0.000135665	-3.98282e-06	1.21407e-05	-1.38658e-05	-2.07211e-05
0.21928	-0.018184	0.000135955	-4.13236e-06	1.21475e-05	-1.39038e-05	-2.0798e-05
0.21955	-0.0181961	0.000136241	-4.28274e-06	1.2154e-05	-1.39416e-05	-2.08749e-05
0.21983	-0.0182078	0.000136524	-4.43396e-06	1.21601e-05	-1.39795e-05	-2.09518e-05
0.2201	-0.0182189	0.000136803	-4.58604e-06	1.21659e-05	-1.40172e-05	-2.10287e-05
0.22037	-0.0182297	0.000137078	-4.73897e-06	1.21712e-05	-1.40549e-05	-2.11057e-05
0.22065	-0.0182399	0.00013735	-4.89275e-06	1.21762e-05	-1.40926e-05	-2.11828e-05
0.22092	-0.0182497	0.000137619	-5.0474e-06	1.21808e-05	-1.41302e-05	-2.12598e-05
0.2212	-0.018259	0.000137884	-5.20291e-06	1.2185e-05	-1.41677e-05	-2.13369e-05
0.22147	-0.0182678	0.000138145	-5.35928e-06	1.21889e-05	-1.42051e-05	-2.14141e-05
0.22173	-0.0182761	0.000138402	-5.51653e-06	1.21923e-05	-1.42425e-05	-2.14912e-05
0.222	-0.018284	0.000138656	-5.67465e-06	1.21954e-05	-1.42798e-05	-2.15684e-05
0.22227	-0.0182913	0.000138906	-5.83364e-06	1.21981e-05	-1.4317e-05	-2.16457e-05
0.22253	-0.0182982	0.000139152	-5.99352e-06	1.22004e-05	-1.43541e-05	-2.17229e-05
0.2228	-0.0183046	0.000139394	-6.15428e-06	1.22022e-05	-1.43912e-05	-2.18002e-05
0.22306	-0.0183105	0.000139633	-6.31592e-06	1.22037e-05	-1.44282e-05	-2.18775e-05
0.22332	-0.0183158	0.000139867	-6.47846e-06	1.22048e-05	-1.44651e-05	-2.19549e-05
0.22359	-0.0183207	0.000140098	-6.64188e-06	1.22055e-05	-1.4502e-05	-2.20323e-05
0.22386	-0.0183251	0.000140325	-6.8062e-06	1.22057e-05	-1.45388e-05	-2.21097e-05
0.22413	-0.018329	0.000140548	-6.97142e-06	1.22056e-05	-1.45755e-05	-2.21871e-05
0.2244	-0.0183323	0.000140766	-7.13753e-06	1.2205e-05	-1.46121e-05	-2.22646e-05
0.22467	-0.0183351	0.000140981	-7.30456e-06	1.22041e-05	-1.46486e-05	-2.2342e-05
0.22495	-0.0183375	0.000141192	-7.47249e-06	1.22027e-05	-1.46851e-05	-2.24195e-05
0.22522	-0.0183393	0.000141399	-7.64132e-06	1.22009e-05	-1.47215e-05	-2.24971e-05
0.22549	-0.0183405	0.000141602	-7.81108e-06	1.21986e-05	-1.47578e-05	-2.25746e-05
0.22576	-0.0183413	0.0001418	-7.98174e-06	1.2196e-05	-1.4794e-05	-2.26522e-05
0.22603	-0.0183415	0.000141995	-8.15333e-06	1.21929e-05	-1.48302e-05	-2.27298e-05
0.22631	-0.0183412	0.000142185	-8.32584e-06	1.21894e-05	-1.48662e-05	-2.28074e-05
0.22658	-0.0183403	0.000142371	-8.49928e-06	1.21854e-05	-1.49022e-05	-2.2885e-05
0.22685	-0.018339	0.000142553	-8.67364e-06	1.21811e-05	-1.49381e-05	-2.29627e-05
0.22712	-0.018337	0.000142731	-8.84893e-06	1.21763e-05	-1.49739e-05	-2.30403e-05
0.2274	-0.0183346	0.000142905	-9.02516e-06	1.2171e-05	-1.50096e-05	-2.3118e-05
0.22767	-0.0183315	0.000143074	-9.20233e-06	1.21653e-05	-1.50452e-05	-2.31957e-05
0.22795	-0.018328	0.000143239	-9.38044e-06	1.21592e-05	-1.50807e-05	-2.32735e-05
0.22822	-0.0183239	0.000143399	-9.55949e-06	1.21526e-05	-1.51162e-05	-2.33512e-05
0.22849	-0.0183192	0.000143555	-9.73948e-06	1.21456e-05	-1.51515e-05	-2.34289e-05
0.22877	-0.0183139	0.000143707	-9.92043e-06	1.21381e-05	-1.51868e-05	-2.35067e-05
0.22904	-0.0183081	0.000143854	-1.01023e-05	1.21302e-05	-1.52219e-05	-2.35845e-05
0.22932	-0.0183017	0.000143997	-1.02852e-05	1.21218e-05	-1.5257e-05	-2.36623e-05
0.22959	-0.0182948	0.000144135	-1.0469e-05	1.21129e-05	-1.5292e-05	-2.37401e-05
0.22986	-0.0182873	0.000144269	-1.06538e-05	1.21036e-05	-1.53269e-05	-2.38179e-05
0.23013	-0.0182792	0.000144398	-1.08395e-05	1.20938e-05	-1.53616e-05	-2.38957e-05
0.2304	-0.0182705	0.000144523	-1.10262e-05	1.20836e-05	-1.53963e-05	-2.39735e-05
0.23067	-0.0182612	0.000144643	-1.12139e-05	1.20728e-05	-1.54309e-05	-2.40513e-05
0.23094	-0.0182513	0.000144758	-1.14025e-05	1.20616e-05	-1.54654e-05	-2.41291e-05
0.23122	-0.0182409	0.000144868	-1.15921e-05	1.205e-05	-1.54998e-05	-2.4207e-05
0.23149	-0.0182298	0.000144974	-1.17827e-05	1.20378e-05	-1.55341e-05	-2.42848e-05
0.23176	-0.0182182	0.000145075	-1.19743e-05	1.20251e-05	-1.55682e-05	-2.43626e-05
0.23204	-0.0182059	0.000145172	-1.21669e-05	1.2012e-05	-1.56023e-05	-2.44405e-05
0.23231	-0.0181931	0.000145263	-1.23604e-05	1.19984e-05	-1.56363e-05	-2.45183e-05
0.23259	-0.0181796	0.00014535	-1.2555e-05	1.19843e-05	-1.56702e-05	-2.45962e-05
0.23286	-0.0181656	0.000145432	-1.27505e-05	1.19697e-05	-1.57039e-05	-2.4674e-05
0.23313	-0.0181509	0.000145509	-1.29471e-05	1.19546e-05	-1.57376e-05	-2.47519e-05
0.2334	-0.0181356	0.000145581	-1.31446e-05	1.1939e-05	-1.57711e-05	-2.48297e-05
0.23368	-0.0181197	0.000145648	-1.33432e-05	1.1923e-05	-1.58046e-05	-2.49076e-05
0.23395	-0.0181032	0.00014571	-1.35427e-05	1.19064e-05	-1.58379e-05	-2.49854e-05
0.23422	-0.018086	0.000145768	-1.37433e-05	1.18893e-05	-1.58711e-05	-2.50633e-05
0.2345	-0.0180682	0.00014582	-1.39449e-05	1.18717e-05	-1.59043e-05	-2.51411e-05
0.23477	-0.0180498	0.000145867	-1.41475e-05	1.18536e-05	-1.59373e-05	-2.5219e-05
0.23504	-0.0180308	0.00014591	-1.43512e-05	1.1835e-05	-1.59702e-05	-2.52968e-05
0.23532	-0.0180111	0.000145947	-1.45559e-05	1.18159e-05	-1.60029e-05	-2.53746e-05
0.23558	-0.0179908	0.000145979	-1.47616e-05	1.17963e-05	-1.60356e-05	-2.54525e-05
0.23586	-0.0179699	0.000146006	-1.49683e-05	1.17762e-05	-1.60682e-05	-2.55303e-05
0.23613	-0.0179483	0.000146028	-1.51761e-05	1.17555e-05	-1.61006e-05	-2.56081e-05
0.23641	-0.0179261	0.000146045	-1.53849e-05	1.17344e-05	-1.61329e-05	-2.56859e-05
0.23667	-0.0179032	0.000146057	-1.55948e-05	1.17127e-05	-1.61651e-05	-2.57637e-05
0.23695	-0.0178797	0.000146063	-1.58057e-05	1.16905e-05	-1.61972e-05	-2.58415e-05
0.23722	-0.0178555	0.000146065	-1.60176e-05	1.16677e-05	-1.62292e-05	-2.59193e-05
0.23749	-0.0178306	0.000146061	-1.62307e-05	1.16445e-05	-1.6261e-05	-2.59971e-05
0.23776	-0.0178052	0.000146052	-1.64448e-05	1.16207e-05	-1.62928e-05	-2.60749e-05
0.23804	-0.017779	0.000146037	-1.66599e-05	1.15964e-05	-1.63244e-05	-2.61526e-05
0.23831	-0.0177522	0.000146018	-1.68761e-05	1.15715e-05	-1.63559e-05	-2.62304e-05
0.23858	-0.0177247	0.000145993	-1.70934e-05	1.15461e-05	-1.63873e-05	-2.63081e-05
0.23886	-0.0176966	0.000145963	-1.73118e-05	1.15202e-05	-1.64185e-05	-2.63859e-05
0.23912	-0.0176678	0.000145927	-1.75312e-05	1.14938e-05	-1.64497e-05	-2.64636e-05
0.2394	-0.0176383	0.000145886	-1.77517e-05	1.14668e-05	-1.64807e-05	-2.65413e-05
0.23967	-0.0176081	0.00014584	-1.79733e-05	1.14392e-05	-1.65115e-05	-2.6619e-05
0.23994	-0.0175773	0.000145788	-1.8196e-05	1.14112e-05	-1.65423e-05	-2.66967e-05
0.24022	-0.0175458	0.000145731	-1.84198e-05	1.13825e-05	-1.65729e-05	-2.67744e-05
0.24049	-0.0175136	0.000145668	-1.86446e-05	1.13534e-05	-1.66035e-05	-2.68521e-05
0.24076	-0.0174807	0.0001456	-1.88706e-05	1.13236e-05	-1.66338e-05	-2.69297e-05
0.24104	-0.0174471	0.000145527	-1.90977e-05	1.12934e-05	-1.66641e-05	-2.70074e-05
0.24131	-0.0174128	0.000145448	-1.93259e-05	1.12625e-05	-1.66942e-05	-2.7085e-05
0.24158	-0.0173778	0.000145363	-1.95552e-05	1.12311e-05	-1.67242e-05	-2.71626e-05
0.24186	-0.0173422	0.000145273	-1.97856e-05	1.11992e-05	-1.67541e-05	-2.72402e-05
0.24213	-0.0173058	0.000145177	-2.00171e-05	1.11666e-05	-1.67838e-05	-2.73177e-05
0.2424	-0.0172687	0.000145075	-2.02498e-05	1.11335e-05	-1.68134e-05	-2.73953e-05
0.24267	-0.0172309	0.000144968	-2.04835e-05	1.10999e-05	-1.68429e-05	-2.74728e-05
0.24295	-0.0171924	0.000144854	-2.07184e-05	1.10656e-05	-1.68722e-05	-2.75503e-05
0.24322	-0.0171531	0.000144735	-2.09544e-05	1.10308e-05	-1.69014e-05	-2.76278e-05
0.24349	-0.0171131	0.000144611	-2.11916e-05	1.09954e-05	-1.69304e-05	-2.77052e-05
0.24376	-0.0170724	0.00014448	-2.14299e-05	1.09594e-05	-1.69593e-05	-2.77827e-05
0.24403	-0.017031	0.000144343	-2.16693e-05	1.09228e-05	-1.69881e-05	-2.78601e-05
0.2443	-0.0169888	0.0001442	-2.19099e-05	1.08856e-05	-1.70167e-05	-2.79374e-05
0.24457	-0.0169459	0.000144052	-2.21516e-05	1.08478e-05	-1.70452e-05	-2.80148e-05
0.24485	-0.0169022	0.000143897	-2.23945e-05	1.08094e-05	-1.70735e-05	-2.80921e-05
0.24512	-0.0168578	0.000143736	-2.26385e-05	1.07704e-05	-1.71017e-05	-2.81694e-05
0.24539	-0.0168126	0.00014357	-2.28837e-05	1.07309e-05	-1.71298e-05	-2.82466e-05
0.24566	-0.0167667	0.000143397	-2.31301e-05	1.06907e-05	-1.71577e-05	-2.83238e-05
0.24594	-0.01672	0.000143217	-2.33776e-05	1.06498e-05	-1.71854e-05	-2.8401e-05
0.24621	-0.0166725	0.000143032	-2.36263e-05	1.06084e-05	-1.7213e-05	-2.84781e-05
0.24648	-0.0166243	0.000142841	-2.38762e-05	1.05664e-05	-1.72405e-05	-2.85552e-05
0.24675	-0.0165753	0.000142643	-2.41272e-05	1.05237e-05	-1.72677e-05	-2.86323e-05
0.24702	-0.0165255	0.000142438	-2.43795e-05	1.04804e-05	-1.72949e-05	-2.87093e-05
0.24729	-0.0164749	0.000142228	-2.46329e-05	1.04365e-05	-1.73219e-05	-2.87863e-05
0.24757	-0.0164235	0.000142011	-2.48875e-05	1.03919e-05	-1.73487e-05	-2.88632e-05
0.24784	-0.0163713	0.000141787	-2.51433e-05	1.03467e-05	-1.73753e-05	-2.89401e-05
0.24811	-0.0163183	0.000141557	-2.54003e-05	1.03008e-05	-1.74018e-05	-2.90169e-05
0.24839	-0.0162646	0.00014132	-2.56585e-05	1.02543e-05	-1.74282e-05	-2.90937e-05
0.24866	-0.01621	0.000141077	-2.59179e-05	1.02071e-05	-1.74543e-05	-2.91704e-05
0.24893	-0.0161546	0.000140827	-2.61785e-05	1.01593e-05	-1.74803e-05	-2.92471e-05
0.2492	-0.0160983	0.00014057	-2.64403e-05	1.01109e-05	-1.75062e-05	-2.93238e-05
0.24948	-0.0160413	0.000140307	-2.67034e-05	1.00617e-05	-1.75318e-05	-2.94003e-05
0.24975	-0.0159834	0.000140037	-2.69677e-05	1.00119e-05	-1.75573e-05	-2.94769e-05
0.25001	-0.0159247	0.00013976	-2.72331e-05	9.96146e-06	-1.75827e-05	-2.95533e-05
0.25028	-0.0158651	0.000139476	-2.74998e-05	9.91031e-06	-1.76078e-05	-2.96297e-05
0.25055	-0.0158047	0.000139185	-2.77678e-05	9.85849e-06	-1.76328e-05	-2.97061e-05
0.25082	-0.0157435	0.000138887	-2.8037e-05	9.80598e-06	-1.76576e-05	-2.97824e-05
0.2511	-0.0156814	0.000138582	-2.83074e-05	9.75279e-06	-1.76823e-05	-2.98586e-05
0.25137	-0.0156184	0.00013827	-2.8579e-05	9.69891e-06	-1.77067e-05	-2.99347e-05
0.25164	-0.0155546	0.000137951	-2.88519e-05	9.64433e-06	-1.7731e-05	-3.00108e-05
0.25191	-0.01549	0.000137625	-2.91261e-05	9.58906e-06	-1.77551e-05	-3.00869e-05
0.25219	-0.0154244	0.000137292	-2.94015e-05	9.53309e-06	-1.7779e-05	-3.01628e-05
0.25246	-0.015358	0.000136952	-2.96781e-05	9.47642e-06	-1.78027e-05	-3.02387e-05
0.25274	-0.0152907	0.000136604	-2.99561e-05	9.41904e-06	-1.78263e-05	-3.03145e-05
0.25301	-0.0152225	0.000136249	-3.02352e-05	9.36095e-06	-1.78497e-05	-3.03903e-05
0.25328	-0.0151535	0.000135887	-3.05157e-05	9.30214e-06	-1.78728e-05	-3.0466e-05
0.25355	-0.0150835	0.000135518	-3.07974e-05	9.24261e-06	-1.78958e-05	-3.05416e-05
0.25383	-0.0150126	0.00013514	-3.10804e-05	9.18236e-06	-1.79186e-05	-3.06171e-05
0.25411	-0.0149409	0.000134756	-3.13647e-05	9.12137e-06	-1.79412e-05	-3.06925e-05
0.25438	-0.0148682	0.000134364	-3.16502e-05	9.05964e-06	-1.79636e-05	-3.07679e-05
0.25465	-0.0147946	0.000133964	-3.19371e-05	8.99717e-06	-1.79859e-05	-3.08432e-05
0.25492	-0.01472	0.000133556	-3.22252e-05	8.93396e-06	-1.80079e-05	-3.09183e-05
0.25519	-0.0146446	0.000133141	-3.25146e-05	8.86999e-06	-1.80297e-05	-3.09934e-05
0.25545	-0.0145682	0.000132718	-3.28053e-05	8.80527e-06	-1.80513e-05	-3.10685e-05
0.25572	-0.0144908	0.000132287	-3.30973e-05	8.73978e-06	-1.80727e-05	-3.11434e-05
0.25598	-0.0144126	0.000131848	-3.33906e-05	8.67353e-06	-1.80939e-05	-3.12182e-05
0.25625	-0.0143333	0.000131401	-3.36852e-05	8.60651e-06	-1.81149e-05	-3.12929e-05
0.25652	-0.0142531	0.000130946	-3.39811e-05	8.53871e-06	-1.81357e-05	-3.13676e-05
0.25679	-0.0141719	0.000130483	-3.42784e-05	8.47013e-06	-1.81563e-05	-3.14421e-05
0.25706	-0.0140898	0.000130012	-3.45769e-05	8.40076e-06	-1.81767e-05	-3.15165e-05
0.25733	-0.0140067	0.000129532	-3.48768e-05	8.3306e-06	-1.81968e-05	-3.15909e-05
0.2576	-0.0139226	0.000129044	-3.5178e-05	8.25964e-06	-1.82168e-05	-3.16651e-05
0.25787	-0.0138375	0.000128548	-3.54805e-05	8.18789e-06	-1.82365e-05	-3.17392e-05
0.25814	-0.0137514	0.000128044	-3.57844e-05	8.11533e-06	-1.8256e-05	-3.18132e-05
0.25842	-0.0136643	0.000127531	-3.60896e-05	8.04197e-06	-1.82753e-05	-3.18871e-05
0.25868	-0.0135763	0.00012701	-3.63961e-05	7.96779e-06	-1.82943e-05	-3.19609e-05
0.25896	-0.0134872	0.000126481	-3.6704e-05	7.89281e-06	-1.83132e-05	-3.20346e-05
0.25923	-0.0133971	0.000125943	-3.70132e-05	7.817e-06	-1.83318e-05	-3.21081e-05
0.25951	-0.013306	0.000125396	-3.73238e-05	7.74037e-06	-1.83502e-05	-3.21816e-05
0.25978	-0.0132139	0.000124841	-3.76357e-05	7.66291e-06	-1.83683e-05	-3.22549e-05
0.26005	-0.0131207	0.000124277	-3.7949e-05	7.58462e-06	-1.83863e-05	-3.23281e-05
0.26032	-0.0130265	0.000123704	-3.82636e-05	7.50549e-06	-1.8404e-05	-3.24012e-05
0.26059	-0.0129313	0.000123123	-3.85797e-05	7.42552e-06	-1.84214e-05	-3.24741e-05
0.26086	-0.012835	0.000122532	-3.88971e-05	7.34471e-06	-1.84387e-05	-3.2547e-05
0.26113	-0.0127377	0.000121933	-3.92158e-05	7.26306e-06	-1.84557e-05	-3.26197e-05
0.2614	-0.0126393	0.000121325	-3.9536e-05	7.18055e-06	-1.84725e-05	-3.26923e-05
0.26168	-0.0125399	0.000120708	-3.98575e-05	7.09718e-06	-1.8489e-05	-3.27648e-05
0.26195	-0.0124394	0.000120083	-4.01805e-05	7.01296e-06	-1.85053e-05	-3.28371e-05
0.26222	-0.0123378	0.000119448	-4.05048e-05	6.92788e-06	-1.85213e-05	-3.29093e-05
0.2625	-0.0122352	0.000118804	-4.08305e-05	6.84192e-06	-1.85371e-05	-3.29814e-05
0.26277	-0.0121315	0.000118151	-4.11577e-05	6.7551e-06	-1.85527e-05	-3.30533e-05
0.26304	-0.0120267	0.000117488	-4.14862e-05	6.6674e-06	-1.8568e-05	-3.31251e-05
0.26332	-0.0119209	0.000116817	-4.18161e-05	6.57882e-06	-1.85831e-05	-3.31968e-05
0.26359	-0.0118139	0.000116136	-4.21475e-05	6.48936e-06	-1.85979e-05	-3.32683e-05
0.26386	-0.0117059	0.000115446	-4.24803e-05	6.39902e-06	-1.86125e-05	-3.33397e-05
0.26413	-0.0115967	0.000114747	-4.28145e-05	6.30779e-06	-1.86268e-05	-3.3411e-05
0.2644	-0.0114865	0.000114039	-4.31501e-05	6.21567e-06	-1.86409e-05	-3.34821e-05
0.26467	-0.0113752	0.000113321	-4.34872e-05	6.12266e-06	-1.86547e-05	-3.35531e-05
0.26494	-0.0112627	0.000112594	-4.38257e-05	6.02876e-06	-1.86683e-05	-3.36239e-05
0.26521	-0.0111492	0.000111857	-4.41656e-05	5.93396e-06	-1.86816e-05	-3.36946e-05
0.26549	-0.0110345	0.000111111	-4.4507e-05	5.83825e-06	-1.86947e-05	-3.37652e-05
0.26576	-0.0109187	0.000110356	-4.48499e-05	5.74164e-06	-1.87075e-05	-3.38356e-05
0.26603	-0.0108018	0.000109591	-4.51942e-05	5.64412e-06	-1.872e-05	-3.39059e-05
0.2663	-0.0106837	0.000108816	-4.554e-05	5.54568e-06	-1.87323e-05	-3.3976e-05
0.26658	-0.0105645	0.000108032	-4.58872e-05	5.44633e-06	-1.87443e-05	-3.40459e-05
0.26685	-0.0104442	0.000107238	-4.62359e-05	5.34605e-06	-1.87561e-05	-3.41158e-05
0.26712	-0.0103227	0.000106434	-4.65861e-05	5.24484e-06	-1.87676e-05	-3.41854e-05
0.2674	-0.0102001	0.00010562	-4.69377e-05	5.1427e-06	-1.87788e-05	-3.42549e-05
0.26767	-0.0100763	0.000104797	-4.72909e-05	5.03962e-06	-1.87898e-05	-3.43243e-05
0.26794	-0.00995136	0.000103963	-4.76455e-05	4.9356e-06	-1.88005e-05	-3.43935e-05
0.26821	-0.00982524	0.00010312	-4.80016e-05	4.83063e-06	-1.88109e-05	-3.44625e-05
0.26848	-0.00969794	0.000102267	-4.83592e-05	4.72471e-06	-1.8821e-05	-3.45314e-05
0.26875	-0.00956946	0.000101403	-4.87183e-05	4.61784e-06	-1.88309e-05	-3.46001e-05
0.26902	-0.00943978	0.00010053	-4.90789e-05	4.50999e-06	-1.88405e-05	-3.46686e-05
0.2693	-0.00930891	9.9646e-05	-4.9441e-05	4.40118e-06	-1.88498e-05	-3.4737e-05
0.26957	-0.00917684	9.87519e-05	-4.98046e-05	4.29139e-06	-1.88588e-05	-3.48052e-05
0.26984	-0.00904355	9.78474e-05	-5.01698e-05	4.18062e-06	-1.88676e-05	-3.48732e-05
0.27011	-0.00890905	9.69326e-05	-5.05364e-05	4.06886e-06	-1.8876e-05	-3.49411e-05
0.27039	-0.00877332	9.60073e-05	-5.09046e-05	3.95612e-06	-1.88842e-05	-3.50087e-05
0.27066	-0.00863637	9.50715e-05	-5.12743e-05	3.84238e-06	-1.88921e-05	-3.50762e-05
0.27094	-0.00849819	9.41251e-05	-5.16456e-05	3.72765e-06	-1.88997e-05	-3.51436e-05
0.27121	-0.00835877	9.31682e-05	-5.20184e-05	3.61191e-06	-1.8907e-05	-3.52107e-05
0.27148	-0.00821812	9.22007e-05	-5.23927e-05	3.49517e-06	-1.8914e-05	-3.52776e-05
0.27175	-0.00807622	9.12225e-05	-5.27686e-05	3.37743e-06	-1.89207e-05	-3.53444e-05
0.27203	-0.00793306	9.02336e-05	-5.3146e-05	3.25867e-06	-1.89271e-05	-3.5411e-05
0.2723	-0.00778865	8.92339e-05	-5.3525e-05	3.13889e-06	-1.89332e-05	-3.54774e-05
0.27258	-0.00764298	8.82234e-05	-5.39055e-05	3.01808e-06	-1.8939e-05	-3.55436e-05
0.27284	-0.00749603	8.7202e-05	-5.42877e-05	2.89625e-06	-1.89445e-05	-3.56096e-05
0.27311	-0.00734781	8.61696e-05	-5.46714e-05	2.77338e-06	-1.89497e-05	-3.56754e-05
0.27338	-0.00719831	8.51262e-05	-5.50566e-05	2.64948e-06	-1.89546e-05	-3.5741e-05
0.27365	-0.00704752	8.40718e-05	-5.54435e-05	2.52453e-06	-1.89592e-05	-3.58064e-05
0.27392	-0.00689544	8.30063e-05	-5.58319e-05	2.39854e-06	-1.89635e-05	-3.58717e-05
0.27418	-0.00674205	8.19296e-05	-5.62219e-05	2.27149e-06	-1.89675e-05	-3.59367e-05
0.27443	-0.00658737	8.08417e-05	-5.66135e-05	2.14339e-06	-1.89711e-05	-3.60015e-05
0.27469	-0.00643138	7.97427e-05	-5.70067e-05	2.01423e-06	-1.89745e-05	-3.60661e-05
0.27495	-0.00627408	7.86323e-05	-5.74016e-05	1.88401e-06	-1.89775e-05	-3.61305e-05
0.2752	-0.00611546	7.75108e-05	-5.7798e-05	1.75273e-06	-1.89802e-05	-3.61947e-05
0.27546	-0.00595552	7.63778e-05	-5.8196e-05	1.62037e-06	-1.89826e-05	-3.62587e-05
0.27571	-0.00579425	7.52336e-05	-5.85956e-05	1.48695e-06	-1.89846e-05	-3.63224e-05
0.27597	-0.00563166	7.4078e-05	-5.89968e-05	1.35245e-06	-1.89864e-05	-3.6386e-05
0.27622	-0.00546773	7.29109e-05	-5.93997e-05	1.21687e-06	-1.89878e-05	-3.64493e-05
0.27648	-0.00530247	7.17325e-05	-5.98041e-05	1.08021e-06	-1.89888e-05	-3.65124e-05
0.27673	-0.00513587	7.05427e-05	-6.02102e-05	9.42475e-07	-1.89896e-05	-3.65753e-05
0.27701	-0.00496793	6.93415e-05	-6.06179e-05	8.03656e-07	-1.899e-05	-3.6638e-05
0.27728	-0.00479864	6.81289e-05	-6.10272e-05	6.63755e-07	-1.89901e-05	-3.67004e-05
0.27755	-0.00462802	6.69048e-05	-6.14382e-05	5.22771e-07	-1.89898e-05	-3.67626e-05
0.27783	-0.00445605	6.56695e-05	-6.18507e-05	3.80705e-07	-1.89892e-05	-3.68246e-05
0.2781	-0.00428273	6.44227e-05	-6.22649e-05	2.37556e-07	-1.89883e-05	-3.68864e-05
0.27838	-0.00410807	6.31646e-05	-6.26807e-05	9.33218e-08	-1.8987e-05	-3.69479e-05
0.27865	-0.00393205	6.18951e-05	-6.30982e-05	-5.19999e-08	-1.89854e-05	-3.70091e-05
0.27893	-0.00375468	6.06142e-05	-6.35172e-05	-1.98412e-07	-1.89835e-05	-3.70702e-05
0.27921	-0.00357595	5.93219e-05	-6.39379e-05	-3.45914e-07	-1.89811e-05	-3.7131e-05
0.27948	-0.00339585	5.80182e-05	-6.43603e-05	-4.94509e-07	-1.89785e-05	-3.71915e-05
0.27976	-0.00321439	5.6703e-05	-6.47842e-05	-6.442e-07	-1.89755e-05	-3.72518e-05
0.28003	-0.00303157	5.53765e-05	-6.52098e-05	-7.94989e-07	-1.89721e-05	-3.73119e-05
0.28031	-0.00284737	5.40385e-05	-6.5637e-05	-9.46876e-07	-1.89684e-05	-3.73717e-05
0.28059	-0.0026618	5.2689e-05	-6.60659e-05	-1.09986e-06	-1.89643e-05	-3.74312e-05
0.28086	-0.00247486	5.13282e-05	-6.64964e-05	-1.25395e-06	-1.89599e-05	-3.74905e-05
0.28114	-0.00228654	4.9956e-05	-6.69285e-05	-1.40913e-06	-1.89551e-05	-3.75495e-05
0.28142	-0.00209685	4.85725e-05	-6.73622e-05	-1.56541e-06	-1.895e-05	-3.76083e-05
0.2817	-0.00190578	4.71776e-05	-6.77976e-05	-1.7228e-06	-1.89445e-05	-3.76667e-05
0.28197	-0.00171334	4.57714e-05	-6.82346e-05	-1.88128e-06	-1.89386e-05	-3.7725e-05
0.28225	-0.00151951	4.43539e-05	-6.86732e-05	-2.04086e-06	-1.89323e-05	-3.77829e-05
0.28253	-0.0013243	4.29251e-05	-6.91135e-05	-2.20155e-06	-1.89257e-05	-3.78406e-05
0.28281	-0.0011277	4.14851e-05	-6.95553e-05	-2.36333e-06	-1.89187e-05	-3.78979e-05
0.28309	-0.000929729	4.00338e-05	-6.99988e-05	-2.52621e-06	-1.89113e-05	-3.7955e-05
0.28337	-0.000730367	3.85713e-05	-7.0444e-05	-2.6902e-06	-1.89035e-05	-3.80119e-05
0.28365	-0.00052962	3.70976e-05	-7.08907e-05	-2.85528e-06	-1.88953e-05	-3.80684e-05
0.28392	-0.000327489	3.56128e-05	-7.13391e-05	-3.02146e-06	-1.88868e-05	-3.81246e-05
0.28419	-0.000123974	3.41169e-05	-7.1789e-05	-3.18874e-06	-1.88779e-05	-3.81805e-05
0.28447	8.09248e-05	3.26099e-05	-7.22406e-05	-3.35711e-06	-1.88686e-05	-3.82362e-05
0.28475	0.000287207	3.10919e-05	-7.26939e-05	-3.52658e-06	-1.88589e-05	-3.82915e-05
0.28502	0.000494873	2.95629e-05	-7.31487e-05	-3.69714e-06	-1.88488e-05	-3.83466e-05
0.2853	0.000703925	2.8023e-05	-7.36052e-05	-3.86879e-06	-1.88383e-05	-3.84013e-05
0.28557	0.000914363	2.64721e-05	-7.40632e-05	-4.04153e-06	-1.88275e-05	-3.84557e-05
0.28584	0.00112619	2.49103e-05	-7.45229e-05	-4.21536e-06	-1.88162e-05	-3.85098e-05
0.28611	0.0013394	2.33376e-05	-7.49842e-05	-4.39029e-06	-1.88045e-05	-3.85637e-05
0.28638	0.001554	2.17541e-05	-7.54472e-05	-4.5663e-06	-1.87924e-05	-3.86171e-05
0.28665	0.00176998	2.01597e-05	-7.59117e-05	-4.74341e-06	-1.878e-05	-3.86703e-05
0.28693	0.00198736	1.85546e-05	-7.63779e-05	-4.9216e-06	-1.87671e-05	-3.87232e-05
0.28719	0.00220612	1.69387e-05	-7.68456e-05	-5.10088e-06	-1.87538e-05	-3.87757e-05
0.28746	0.00242626	1.53122e-05	-7.7315e-05	-5.28124e-06	-1.87401e-05	-3.88279e-05
0.28772	0.00264779	1.3675e-05	-7.7786e-05	-5.46268e-06	-1.8726e-05	-3.88798e-05
0.28799	0.0028707	1.20274e-05	-7.82586e-05	-5.6452e-06	-1.87115e-05	-3.89314e-05
0.28826	0.00309498	1.03694e-05	-7.87328e-05	-5.82878e-06	-1.86966e-05	-3.89826e-05
0.28852	0.00332064	8.70094e-06	-7.92086e-05	-6.01344e-06	-1.86812e-05	-3.90334e-05
0.2888	0.00354767	7.02225e-06	-7.9686e-05	-6.19916e-06	-1.86654e-05	-3.9084e-05
0.28907	0.00377607	5.33338e-06	-8.0165e-05	-6.38594e-06	-1.86492e-05	-3.91342e-05
0.28934	0.00400584	3.6344e-06	-8.06455e-05	-6.57377e-06	-1.86326e-05	-3.9184e-05
0.28962	0.00423697	1.92539e-06	-8.11277e-05	-6.76266e-06	-1.86156e-05	-3.92335e-05
0.28989	0.00446946	2.06431e-07	-8.16114e-05	-6.95259e-06	-1.85981e-05	-3.92827e-05
0.29016	0.0047033	-1.52237e-06	-8.20967e-05	-7.14357e-06	-1.85802e-05	-3.93314e-05
0.29044	0.0049385	-3.26092e-06	-8.25836e-05	-7.33558e-06	-1.85619e-05	-3.93799e-05
0.29071	0.00517504	-5.00909e-06	-8.3072e-05	-7.52862e-06	-1.85431e-05	-3.94279e-05
0.29099	0.00541292	-6.76678e-06	-8.3562e-05	-7.72269e-06	-1.85239e-05	-3.94756e-05
0.29126	0.00565214	-8.5339e-06	-8.40536e-05	-7.91777e-06	-1.85043e-05	-3.9523e-05
0.29153	0.0058927	-1.03104e-05	-8.45467e-05	-8.11387e-06	-1.84842e-05	-3.957e-05
0.29181	0.00613458	-1.20961e-05	-8.50413e-05	-8.31098e-06	-1.84637e-05	-3.96166e-05
0.29208	0.0063778	-1.3891e-05	-8.55375e-05	-8.5091e-06	-1.84428e-05	-3.96628e-05
0.29235	0.00662234	-1.5695e-05	-8.60353e-05	-8.70823e-06	-1.84214e-05	-3.97086e-05
0.29263	0.00686821	-1.75081e-05	-8.65345e-05	-8.90835e-06	-1.83995e-05	-3.97541e-05
0.2929	0.00711541	-1.93302e-05	-8.70354e-05	-9.10947e-06	-1.83772e-05	-3.97992e-05
0.29317	0.00736393	-2.11612e-05	-8.75377e-05	-9.31159e-06	-1.83545e-05	-3.98438e-05
0.29344	0.00761377	-2.3001e-05	-8.80416e-05	-9.51471e-06	-1.83313e-05	-3.98881e-05
0.29371	0.00786493	-2.48497e-05	-8.8547e-05	-9.71882e-06	-1.83076e-05	-3.9932e-05
0.29399	0.00811741	-2.67071e-05	-8.90539e-05	-9.92391e-06	-1.82835e-05	-3.99755e-05
0.29426	0.0083712	-2.85731e-05	-8.95624e-05	-1.013e-05	-1.82589e-05	-4.00186e-05
0.29453	0.00862631	-3.04476e-05	-9.00724e-05	-1.0337e-05	-1.82338e-05	-4.00613e-05
0.2948	0.00888272	-3.23306e-05	-9.05838e-05	-1.05451e-05	-1.82083e-05	-4.01036e-05
0.29508	0.00914045	-3.42221e-05	-9.10968e-05	-1.07541e-05	-1.81823e-05	-4.01454e-05
0.29534	0.00939949	-3.61219e-05	-9.16113e-05	-1.0964e-05	-1.81559e-05	-4.01869e-05
0.29561	0.00965984	-3.803e-05	-9.21272e-05	-1.1175e-05	-1.81289e-05	-4.02279e-05
0.29588	0.00992149	-3.99463e-05	-9.26447e-05	-1.13869e-05	-1.81015e-05	-4.02685e-05
0.29615	0.0101844	-4.18708e-05	-9.31636e-05	-1.15998e-05	-1.80736e-05	-4.03086e-05
0.29642	0.0104487	-4.38034e-05	-9.36841e-05	-1.18136e-05	-1.80453e-05	-4.03483e-05
0.29669	0.0107143	-4.5744e-05	-9.4206e-05	-1.20284e-05	-1.80164e-05	-4.03876e-05
0.29695	0.0109811	-4.76925e-05	-9.47294e-05	-1.22442e-05	-1.79871e-05	-4.04264e-05
0.29722	0.0112493	-4.96488e-05	-9.52542e-05	-1.24609e-05	-1.79572e-05	-4.04648e-05
0.29749	0.0115187	-5.16128e-05	-9.57806e-05	-1.26785e-05	-1.79269e-05	-4.05028e-05
0.29776	0.0117895	-5.35845e-05	-9.63084e-05	-1.28971e-05	-1.7896e-05	-4.05403e-05
0.29804	0.0120615	-5.55639e-05	-9.68376e-05	-1.31166e-05	-1.78647e-05	-4.05773e-05
0.29831	0.0123348	-5.75507e-05	-9.73683e-05	-1.3337e-05	-1.78329e-05	-4.06139e-05
0.29858	0.0126094	-5.95451e-05	-9.79005e-05	-1.35584e-05	-1.78006e-05	-4.065e-05
0.29885	0.0128853	-6.1547e-05	-9.84341e-05	-1.37807e-05	-1.77677e-05	-4.06856e-05
0.29912	0.0131625	-6.35563e-05	-9.89692e-05	-1.4004e-05	-1.77344e-05	-4.07208e-05
0.29939	0.0134409	-6.55729e-05	-9.95057e-05	-1.42282e-05	-1.77005e-05	-4.07555e-05
0.29966	0.0137207	-6.75968e-05	-0.000100044	-1.44533e-05	-1.76661e-05	-4.07897e-05
0.29992	0.0140017	-6.9628e-05	-0.000100583	-1.46793e-05	-1.76313e-05	-4.08234e-05
0.30019	0.0142841	-7.16664e-05	-0.000101124	-1.49063e-05	-1.75958e-05	-4.08566e-05
0.30045	0.0145677	-7.37118e-05	-0.000101666	-1.51341e-05	-1.75599e-05	-4.08894e-05
0.30071	0.0148526	-7.57641e-05	-0.00010221	-1.53629e-05	-1.75235e-05	-4.09216e-05
0.30098	0.0151387	-7.78233e-05	-0.000102755	-1.55926e-05	-1.74865e-05	-4.09534e-05
0.30125	0.0154262	-7.98892e-05	-0.000103301	-1.58232e-05	-1.7449e-05	-4.09846e-05
0.30151	0.0157148	-8.19617e-05	-0.000103849	-1.60547e-05	-1.74109e-05	-4.10153e-05
0.30177	0.0160048	-8.40407e-05	-0.000104399	-1.62871e-05	-1.73723e-05	-4.10455e-05
0.30203	0.016296	-8.61261e-05	-0.000104949	-1.65203e-05	-1.73332e-05	-4.10752e-05
0.30229	0.0165885	-8.82177e-05	-0.000105501	-1.67545e-05	-1.72935e-05	-4.11044e-05
0.30255	0.0168821	-9.03154e-05	-0.000106055	-1.69895e-05	-1.72533e-05	-4.1133e-05
0.3028	0.0171771	-9.24191e-05	-0.00010661	-1.72253e-05	-1.72125e-05	-4.11612e-05
0.30308	0.0174732	-9.45285e-05	-0.000107166	-1.7462e-05	-1.71712e-05	-4.11887e-05
0.30335	0.0177706	-9.66436e-05	-0.000107723	-1.76996e-05	-1.71294e-05	-4.12158e-05
0.30362	0.0180692	-9.87641e-05	-0.000108282	-1.7938e-05	-1.70869e-05	-4.12423e-05
0.3039	0.018369	-0.00010089	-0.000108842	-1.81772e-05	-1.7044e-05	-4.12682e-05
0.30417	0.01867	-0.000103021	-0.000109404	-1.84172e-05	-1.70004e-05	-4.12936e-05
0.30445	0.0189722	-0.000105157	-0.000109967	-1.8658e-05	-1.69563e-05	-4.13184e-05
0.30472	0.0192755	-0.000107297	-0.000110531	-1.88996e-05	-1.69117e-05	-4.13427e-05
0.30497	0.0195801	-0.000109442	-0.000111096	-1.9142e-05	-1.68664e-05	-4.13663e-05
0.30524	0.0198858	-0.000111592	-0.000111663	-1.93852e-05	-1.68206e-05	-4.13895e-05
0.30551	0.0201926	-0.000113747	-0.000112231	-1.96291e-05	-1.67742e-05	-4.1412e-05
0.30579	0.0205007	-0.000115905	-0.0001128	-1.98739e-05	-1.67273e-05	-4.14339e-05
0.30606	0.0208099	-0.000118068	-0.00011337	-2.01194e-05	-1.66797e-05	-4.14553e-05
0.30631	0.0211203	-0.000120235	-0.000113942	-2.03656e-05	-1.66316e-05	-4.14761e-05
0.30659	0.0214318	-0.000122406	-0.000114515	-2.06126e-05	-1.65828e-05	-4.14962e-05
0.30686	0.0217444	-0.000124581	-0.000115089	-2.08604e-05	-1.65335e-05	-4.15158e-05
0.30712	0.0220582	-0.000126759	-0.000115665	-2.11089e-05	-1.64836e-05	-4.15348e-05
0.30738	0.0223731	-0.000128941	-0.000116241	-2.13581e-05	-1.64331e-05	-4.15531e-05
0.30763	0.0226891	-0.000131126	-0.000116819	-2.1608e-05	-1.6382e-05	-4.15708e-05
0.30788	0.0230063	-0.000133314	-0.000117398	-2.18587e-05	-1.63303e-05	-4.15879e-05
0.30814	0.0233245	-0.000135505	-0.000117978	-2.211e-05	-1.6278e-05	-4.16044e-05
0.30839	0.0236439	-0.000137699	-0.000118559	-2.2362e-05	-1.6225e-05	-4.16202e-05
0.30864	0.0239643	-0.000139895	-0.000119142	-2.26147e-05	-1.61715e-05	-4.16354e-05
0.30889	0.0242858	-0.000142094	-0.000119725	-2.28681e-05	-1.61173e-05	-4.16499e-05
0.30914	0.0246084	-0.000144295	-0.00012031	-2.31222e-05	-1.60626e-05	-4.16638e-05
0.30939	0.0249321	-0.000146499	-0.000120896	-2.33769e-05	-1.60072e-05	-4.16771e-05
0.30964	0.0252568	-0.000148705	-0.000121483	-2.36322e-05	-1.59511e-05	-4.16896e-05
0.30989	0.0255826	-0.000150912	-0.000122071	-2.38882e-05	-1.58945e-05	-4.17015e-05
0.31014	0.0259095	-0.000153121	-0.00012266	-2.41449e-05	-1.58372e-05	-4.17128e-05
0.31039	0.0262374	-0.000155332	-0.000123251	-2.44021e-05	-1.57792e-05	-4.17233e-05
0.31064	0.0265663	-0.000157544	-0.000123842	-2.466e-05	-1.57207e-05	-4.17332e-05
0.31089	0.0268962	-0.000159758	-0.000124434	-2.49184e-05	-1.56615e-05	-4.17424e-05
0.31114	0.0272272	-0.000161972	-0.000125028	-2.51775e-05	-1.56016e-05	-4.17509e-05
0.31139	0.0275592	-0.000164188	-0.000125623	-2.54372e-05	-1.55411e-05	-4.17587e-05
0.31164	0.0278922	-0.000166404	-0.000126218	-2.56975e-05	-1.548e-05	-4.17658e-05
0.31189	0.0282263	-0.000168622	-0.000126815	-2.59583e-05	-1.54182e-05	-4.17722e-05
0.31215	0.0285613	-0.00017084	-0.000127413	-2.62197e-05	-1.53557e-05	-4.17779e-05
0.31243	0.0288974	-0.000173059	-0.000128011	-2.64818e-05	-1.52926e-05	-4.17829e-05
0.3127	0.0292344	-0.000175278	-0.000128611	-2.67443e-05	-1.52289e-05	-4.17871e-05
0.31297	0.0295725	-0.000177498	-0.000129212	-2.70075e-05	-1.51644e-05	-4.17907e-05
0.31324	0.0299115	-0.000179717	-0.000129814	-2.72712e-05	-1.50993e-05	-4.17935e-05
0.31352	0.0302516	-0.000181937	-0.000130417	-2.75354e-05	-1.50336e-05	-4.17956e-05
0.31379	0.0305926	-0.000184156	-0.00013102	-2.78001e-05	-1.49671e-05	-4.17969e-05
0.31406	0.0309345	-0.000186375	-0.000131625	-2.80654e-05	-1.49e-05	-4.17975e-05
0.31433	0.0312774	-0.000188594	-0.000132231	-2.83312e-05	-1.48322e-05	-4.17974e-05
0.31459	0.0316213	-0.000190812	-0.000132838	-2.85975e-05	-1.47637e-05	-4.17965e-05
0.31485	0.031966	-0.000193028	-0.000133445	-2.88642e-05	-1.46946e-05	-4.17948e-05
0.31512	0.0323118	-0.000195244	-0.000134054	-2.91315e-05	-1.46247e-05	-4.17924e-05
0.31539	0.0326584	-0.000197459	-0.000134663	-2.93992e-05	-1.45542e-05	-4.17893e-05
0.31565	0.033006	-0.000199672	-0.000135274	-2.96675e-05	-1.44829e-05	-4.17853e-05
0.31593	0.0333545	-0.000201884	-0.000135885	-2.99361e-05	-1.4411e-05	-4.17806e-05
0.3162	0.0337038	-0.000204094	-0.000136497	-3.02052e-05	-1.43384e-05	-4.17751e-05
0.31646	0.0340541	-0.000206302	-0.000137111	-3.04748e-05	-1.4265e-05	-4.17689e-05
0.31673	0.0344052	-0.000208509	-0.000137725	-3.07447e-05	-1.4191e-05	-4.17618e-05
0.317	0.0347573	-0.000210713	-0.00013834	-3.10151e-05	-1.41163e-05	-4.1754e-05
0.31727	0.0351102	-0.000212914	-0.000138956	-3.12859e-05	-1.40408e-05	-4.17453e-05
0.31754	0.0354639	-0.000215113	-0.000139572	-3.15571e-05	-1.39647e-05	-4.17359e-05
0.31781	0.0358185	-0.000217309	-0.00014019	-3.18287e-05	-1.38878e-05	-4.17257e-05
0.31807	0.036174	-0.000219503	-0.000140808	-3.21007e-05	-1.38102e-05	-4.17146e-05
0.31835	0.0365303	-0.000221694	-0.000141427	-3.23731e-05	-1.37319e-05	-4.17027e-05
0.31862	0.0368875	-0.000223881	-0.000142048	-3.26458e-05	-1.36529e-05	-4.169e-05
0.3189	0.0372455	-0.000226066	-0.000142668	-3.29189e-05	-1.35731e-05	-4.16765e-05
0.31917	0.0376043	-0.000228247	-0.00014329	-3.31924e-05	-1.34926e-05	-4.16622e-05
0.31945	0.0379639	-0.000230424	-0.000143913	-3.34662e-05	-1.34114e-05	-4.1647e-05
0.31972	0.0383244	-0.000232598	-0.000144536	-3.37403e-05	-1.33294e-05	-4.1631e-05
0.32	0.0386856	-0.000234768	-0.00014516	-3.40148e-05	-1.32467e-05	-4.16141e-05
0.32028	0.0390477	-0.000236934	-0.000145785	-3.42896e-05	-1.31633e-05	-4.15964e-05
0.32056	0.0394106	-0.000239096	-0.000146411	-3.45647e-05	-1.30791e-05	-4.15779e-05
0.32083	0.0397742	-0.000241254	-0.000147037	-3.48401e-05	-1.29941e-05	-4.15584e-05
0.32111	0.0401386	-0.000243407	-0.000147664	-3.51159e-05	-1.29084e-05	-4.15381e-05
0.32138	0.0405038	-0.000245555	-0.000148292	-3.53919e-05	-1.2822e-05	-4.1517e-05
0.32165	0.0408698	-0.000247699	-0.000148921	-3.56682e-05	-1.27348e-05	-4.14949e-05
0.32193	0.0412365	-0.000249837	-0.00014955	-3.59447e-05	-1.26468e-05	-4.1472e-05
0.3222	0.041604	-0.000251971	-0.00015018	-3.62216e-05	-1.25581e-05	-4.14482e-05
0.32248	0.0419723	-0.0002541	-0.000150811	-3.64987e-05	-1.24685e-05	-4.14235e-05
0.32275	0.0423413	-0.000256223	-0.000151443	-3.6776e-05	-1.23783e-05	-4.13979e-05
0.32303	0.042711	-0.00025834	-0.000152075	-3.70536e-05	-1.22872e-05	-4.13714e-05
0.3233	0.0430815	-0.000260453	-0.000152708	-3.73314e-05	-1.21954e-05	-4.1344e-05
0.32356	0.0434527	-0.000262559	-0.000153341	-3.76095e-05	-1.21028e-05	-4.13157e-05
0.32384	0.0438246	-0.00026466	-0.000153976	-3.78878e-05	-1.20094e-05	-4.12865e-05
0.32411	0.0441972	-0.000266754	-0.00015461	-3.81663e-05	-1.19152e-05	-4.12563e-05
0.32438	0.0445706	-0.000268843	-0.000155246	-3.8445e-05	-1.18202e-05	-4.12253e-05
0.32466	0.0449447	-0.000270925	-0.000155882	-3.8724e-05	-1.17244e-05	-4.11933e-05
0.32492	0.0453195	-0.000273001	-0.000156519	-3.90031e-05	-1.16279e-05	-4.11603e-05
0.32519	0.045695	-0.000275071	-0.000157157	-3.92824e-05	-1.15305e-05	-4.11265e-05
0.32546	0.0460712	-0.000277134	-0.000157795	-3.9562e-05	-1.14323e-05	-4.10917e-05
0.32573	0.0464481	-0.000279191	-0.000158434	-3.98417e-05	-1.13334e-05	-4.10559e-05
0.32599	0.0468256	-0.00028124	-0.000159073	-4.01216e-05	-1.12336e-05	-4.10192e-05
0.32626	0.0472039	-0.000283283	-0.000159713	-4.04016e-05	-1.1133e-05	-4.09816e-05
0.32653	0.0475828	-0.000285318	-0.000160354	-4.06818e-05	-1.10316e-05	-4.09429e-05
0.3268	0.0479624	-0.000287346	-0.000160995	-4.09622e-05	-1.09294e-05	-4.09034e-05
0.32708	0.0483427	-0.000289366	-0.000161637	-4.12427e-05	-1.08263e-05	-4.08628e-05
0.32734	0.0487236	-0.000291379	-0.00016228	-4.15232e-05	-1.07224e-05	-4.08212e-05
0.32761	0.0491051	-0.000293383	-0.000162922	-4.1804e-05	-1.06177e-05	-4.07787e-05
0.32788	0.0494872	-0.000295379	-0.000163566	-4.20847e-05	-1.05122e-05	-4.07352e-05
0.32815	0.04987	-0.000297367	-0.00016421	-4.23656e-05	-1.04058e-05	-4.06907e-05
0.32843	0.0502533	-0.000299346	-0.000164855	-4.26466e-05	-1.02986e-05	-4.06452e-05
0.3287	0.0506372	-0.000301316	-0.0001655	-4.29276e-05	-1.01906e-05	-4.05986e-05
0.32897	0.0510218	-0.000303277	-0.000166145	-4.32087e-05	-1.00817e-05	-4.05511e-05
0.32924	0.0514068	-0.000305228	-0.000166791	-4.34897e-05	-9.97192e-06	-4.05025e-05
0.32952	0.0517925	-0.00030717	-0.000167438	-4.37708e-05	-9.86132e-06	-4.04529e-05
0.32979	0.0521786	-0.000309102	-0.000168085	-4.40519e-05	-9.74987e-06	-4.04023e-05
0.33007	0.0525653	-0.000311023	-0.000168732	-4.4333e-05	-9.63756e-06	-4.03507e-05
0.33034	0.0529525	-0.000312934	-0.00016938	-4.4614e-05	-9.52439e-06	-4.0298e-05
0.3306	0.0533402	-0.000314835	-0.000170028	-4.4895e-05	-9.41035e-06	-4.02442e-05
0.33087	0.0537284	-0.000316724	-0.000170677	-4.5176e-05	-9.29545e-06	-4.01894e-05
0.33114	0.054117	-0.000318603	-0.000171326	-4.54569e-05	-9.17967e-06	-4.01336e-05
0.3314	0.0545062	-0.00032047	-0.000171975	-4.57376e-05	-9.06301e-06	-4.00767e-05
0.33165	0.0548958	-0.000322325	-0.000172625	-4.60183e-05	-8.94548e-06	-4.00187e-05
0.33192	0.0552858	-0.000324169	-0.000173275	-4.62989e-05	-8.82706e-06	-3.99596e-05
0.33217	0.0556762	-0.000326	-0.000173925	-4.65794e-05	-8.70776e-06	-3.98994e-05
0.33243	0.0560671	-0.00032782	-0.000174575	-4.68597e-05	-8.58756e-06	-3.98382e-05
0.33268	0.0564584	-0.000329626	-0.000175226	-4.71399e-05	-8.46648e-06	-3.97758e-05
0.33294	0.05685	-0.000331419	-0.000175877	-4.74198e-05	-8.34449e-06	-3.97123e-05
0.33319	0.057242	-0.000333199	-0.000176529	-4.76996e-05	-8.2216e-06	-3.96477e-05
0.33345	0.0576344	-0.000334965	-0.00017718	-4.79792e-05	-8.0978e-06	-3.9582e-05
0.33371	0.0580271	-0.000336718	-0.000177832	-4.82585e-05	-7.97309e-06	-3.95152e-05
0.33397	0.0584201	-0.000338456	-0.000178484	-4.85376e-05	-7.84747e-06	-3.94472e-05
0.33423	0.0588134	-0.000340179	-0.000179136	-4.88164e-05	-7.72093e-06	-3.93781e-05
0.33449	0.0592069	-0.000341888	-0.000179789	-4.90949e-05	-7.59347e-06	-3.93079e-05
0.33476	0.0596008	-0.000343581	-0.000180441	-4.93731e-05	-7.46508e-06	-3.92364e-05
0.33502	0.0599949	-0.000345259	-0.000181094	-4.9651e-05	-7.33577e-06	-3.91639e-05
0.33528	0.0603893	-0.000346922	-0.000181746	-4.99286e-05	-7.20552e-06	-3.90901e-05
0.33555	0.0607839	-0.000348568	-0.000182399	-5.02058e-05	-7.07434e-06	-3.90152e-05
0.33581	0.0611787	-0.000350198	-0.000183052	-5.04826e-05	-6.94222e-06	-3.89391e-05
0.33607	0.0615737	-0.000351812	-0.000183704	-5.07591e-05	-6.80916e-06	-3.88618e-05
0.33633	0.0619689	-0.00035341	-0.000184357	-5.10352e-05	-6.67515e-06	-3.87833e-05
0.3366	0.0623643	-0.00035499	-0.00018501	-5.13109e-05	-6.54019e-06	-3.87036e-05
0.33686	0.0627598	-0.000356553	-0.000185663	-5.15861e-05	-6.40428e-06	-3.86227e-05
0.33713	0.0631555	-0.000358098	-0.000186316	-5.18609e-05	-6.26741e-06	-3.85406e-05
0.33739	0.0635514	-0.000359626	-0.000186969	-5.21353e-05	-6.12958e-06	-3.84573e-05
0.33765	0.0639474	-0.000361136	-0.000187622	-5.24092e-05	-5.99079e-06	-3.83728e-05
0.33792	0.0643435	-0.000362629	-0.000188275	-5.26827e-05	-5.85103e-06	-3.8287e-05
0.3382	0.0647397	-0.000364102	-0.000188927	-5.29556e-05	-5.7103e-06	-3.82e-05
0.33847	0.0651361	-0.000365558	-0.00018958	-5.32281e-05	-5.5686e-06	-3.81117e-05
0.33875	0.0655325	-0.000366994	-0.000190233	-5.35e-05	-5.42592e-06	-3.80223e-05
0.33902	0.065929	-0.000368411	-0.000190885	-5.37714e-05	-5.28226e-06	-3.79315e-05
0.33929	0.0663255	-0.000369809	-0.000191538	-5.40423e-05	-5.13762e-06	-3.78395e-05
0.33955	0.0667221	-0.000371187	-0.00019219	-5.43126e-05	-4.99198e-06	-3.77462e-05
0.33981	0.0671186	-0.000372545	-0.000192842	-5.45823e-05	-4.84536e-06	-3.76517e-05
0.34008	0.0675152	-0.000373882	-0.000193494	-5.48513e-05	-4.69774e-06	-3.75559e-05
0.34034	0.0679118	-0.000375198	-0.000194146	-5.51198e-05	-4.54912e-06	-3.74588e-05
0.3406	0.0683083	-0.000376494	-0.000194797	-5.53875e-05	-4.39949e-06	-3.73604e-05
0.34086	0.0687047	-0.000377767	-0.000195448	-5.56547e-05	-4.24886e-06	-3.72607e-05
0.34113	0.0691011	-0.000379019	-0.000196099	-5.59211e-05	-4.09721e-06	-3.71596e-05
0.34139	0.0694974	-0.000380249	-0.00019675	-5.61868e-05	-3.94456e-06	-3.70573e-05
0.34165	0.0698936	-0.000381457	-0.0001974	-5.64518e-05	-3.79088e-06	-3.69537e-05
0.34192	0.0702897	-0.000382642	-0.000198051	-5.6716e-05	-3.63619e-06	-3.68487e-05
0.34218	0.0706856	-0.000383803	-0.0001987	-5.69795e-05	-3.48047e-06	-3.67424e-05
0.34244	0.0710814	-0.000384942	-0.00019935	-5.72422e-05	-3.32372e-06	-3.66347e-05
0.34271	0.071477	-0.000386057	-0.000199999	-5.75041e-05	-3.16594e-06	-3.65257e-05
0.34296	0.0718725	-0.000387147	-0.000200648	-5.77652e-05	-3.00712e-06	-3.64154e-05
0.34322	0.0722677	-0.000388214	-0.000201296	-5.80254e-05	-2.84727e-06	-3.63036e-05
0.34348	0.0726627	-0.000389256	-0.000201944	-5.82848e-05	-2.68636e-06	-3.61906e-05
0.34374	0.0730575	-0.000390273	-0.000202591	-5.85433e-05	-2.52442e-06	-3.60761e-05
0.344	0.073452	-0.000391265	-0.000203238	-5.88009e-05	-2.36142e-06	-3.59603e-05
0.34427	0.0738463	-0.000392232	-0.000203885	-5.90577e-05	-2.19736e-06	-3.5843e-05
0.34453	0.0742403	-0.000393173	-0.000204531	-5.93135e-05	-2.03225e-06	-3.57244e-05
0.34479	0.0746341	-0.000394088	-0.000205176	-5.95684e-05	-1.86607e-06	-3.56044e-05
0.34506	0.0750275	-0.000394978	-0.000205821	-5.98224e-05	-1.69883e-06	-3.5483e-05
0.34532	0.0754206	-0.000395841	-0.000206466	-6.00754e-05	-1.53052e-06	-3.53601e-05
0.34558	0.0758134	-0.000396677	-0.00020711	-6.03274e-05	-1.36113e-06	-3.52358e-05
0.34585	0.0762059	-0.000397486	-0.000207753	-6.05784e-05	-1.19066e-06	-3.51101e-05
0.34611	0.076598	-0.000398267	-0.000208396	-6.08284e-05	-1.0191e-06	-3.4983e-05
0.34638	0.0769897	-0.000399021	-0.000209038	-6.10774e-05	-8.4646e-07	-3.48544e-05
0.34665	0.0773811	-0.000399747	-0.00020968	-6.13253e-05	-6.72725e-07	-3.47244e-05
0.34693	0.077772	-0.000400445	-0.000210321	-6.15721e-05	-4.97893e-07	-3.45929e-05
0.3472	0.0781626	-0.000401115	-0.000210961	-6.18179e-05	-3.2196e-07	-3.44599e-05
0.34748	0.0785527	-0.000401756	-0.000211601	-6.20626e-05	-1.44923e-07	-3.43254e-05
0.34775	0.0789424	-0.000402368	-0.00021224	-6.23062e-05	3.32232e-08	-3.41895e-05
0.34802	0.0793316	-0.00040295	-0.000212878	-6.25487e-05	2.12482e-07	-3.40521e-05
0.3483	0.0797204	-0.000403504	-0.000213515	-6.27901e-05	3.92857e-07	-3.39132e-05
0.34857	0.0801087	-0.000404028	-0.000214152	-6.30303e-05	5.74352e-07	-3.37728e-05
0.34885	0.0804966	-0.000404522	-0.000214788	-6.32693e-05	7.56971e-07	-3.36309e-05
0.34912	0.0808839	-0.000404985	-0.000215424	-6.35072e-05	9.40719e-07	-3.34874e-05
0.34939	0.0812708	-0.000405419	-0.000216058	-6.37439e-05	1.1256e-06	-3.33425e-05
0.34966	0.0816571	-0.000405822	-0.000216692	-6.39795e-05	1.31162e-06	-3.3196e-05
0.34993	0.082043	-0.000406194	-0.000217325	-6.42138e-05	1.49878e-06	-3.3048e-05
0.3502	0.0824283	-0.000406536	-0.000217957	-6.44469e-05	1.68708e-06	-3.28984e-05
0.35047	0.0828131	-0.000406847	-0.000218589	-6.46788e-05	1.87653e-06	-3.27473e-05
0.35073	0.0831973	-0.000407126	-0.000219219	-6.49095e-05	2.06714e-06	-3.25947e-05
0.351	0.0835811	-0.000407374	-0.000219849	-6.51389e-05	2.2589e-06	-3.24405e-05
0.35127	0.0839643	-0.000407591	-0.000220478	-6.53671e-05	2.45183e-06	-3.22847e-05
0.35153	0.0843469	-0.000407776	-0.000221106	-6.55941e-05	2.64592e-06	-3.21273e-05
0.3518	0.0847289	-0.000407929	-0.000221733	-6.58197e-05	2.84118e-06	-3.19684e-05
0.35207	0.0851104	-0.000408049	-0.000222359	-6.60441e-05	3.03761e-06	-3.18079e-05
0.35233	0.0854912	-0.000408137	-0.000222985	-6.62672e-05	3.23523e-06	-3.16457e-05
0.35261	0.0858715	-0.000408192	-0.000223609	-6.64889e-05	3.43403e-06	-3.1482e-05
0.35288	0.0862511	-0.000408214	-0.000224233	-6.67093e-05	3.63401e-06	-3.13167e-05
0.35315	0.0866301	-0.000408202	-0.000224855	-6.69284e-05	3.83519e-06	-3.11497e-05
0.35342	0.0870084	-0.000408156	-0.000225477	-6.71461e-05	4.03757e-06	-3.09811e-05
0.35369	0.087386	-0.000408077	-0.000226097	-6.73624e-05	4.24114e-06	-3.08109e-05
0.35396	0.087763	-0.000407963	-0.000226717	-6.75773e-05	4.44593e-06	-3.0639e-05
0.35424	0.0881393	-0.000407815	-0.000227336	-6.77908e-05	4.65192e-06	-3.04655e-05
0.35451	0.0885148	-0.000407631	-0.000227953	-6.80028e-05	4.85912e-06	-3.02903e-05
0.35478	0.0888897	-0.000407413	-0.00022857	-6.82134e-05	5.06755e-06	-3.01135e-05
0.35505	0.0892637	-0.000407159	-0.000229185	-6.84225e-05	5.2772e-06	-2.9935e-05
0.35533	0.0896371	-0.000406868	-0.000229799	-6.86301e-05	5.48807e-06	-2.97548e-05
0.3556	0.0900096	-0.000406542	-0.000230412	-6.88362e-05	5.70018e-06	-2.95729e-05
0.35587	0.0903814	-0.00040618	-0.000231024	-6.90408e-05	5.91352e-06	-2.93893e-05
0.35615	0.0907523	-0.000405781	-0.000231635	-6.92439e-05	6.12811e-06	-2.9204e-05
0.35642	0.0911225	-0.000405344	-0.000232245	-6.94454e-05	6.34394e-06	-2.9017e-05
0.35669	0.0914918	-0.000404871	-0.000232853	-6.96454e-05	6.56102e-06	-2.88283e-05
0.35696	0.0918603	-0.000404361	-0.00023346	-6.98437e-05	6.77935e-06	-2.86378e-05
0.35723	0.092228	-0.000403813	-0.000234067	-7.00406e-05	6.99895e-06	-2.84456e-05
0.3575	0.0925948	-0.000403227	-0.000234671	-7.02358e-05	7.21981e-06	-2.82517e-05
0.35778	0.0929608	-0.000402604	-0.000235275	-7.04294e-05	7.44194e-06	-2.8056e-05
0.35805	0.0933259	-0.000401942	-0.000235877	-7.06214e-05	7.66534e-06	-2.78585e-05
0.35832	0.0936901	-0.000401241	-0.000236478	-7.08117e-05	7.89003e-06	-2.76593e-05
0.35859	0.0940534	-0.000400502	-0.000237078	-7.10004e-05	8.11599e-06	-2.74583e-05
0.35886	0.0944158	-0.000399724	-0.000237677	-7.11874e-05	8.34325e-06	-2.72556e-05
0.35913	0.0947773	-0.000398906	-0.000238274	-7.13728e-05	8.5718e-06	-2.7051e-05
0.3594	0.0951379	-0.000398049	-0.000238869	-7.15564e-05	8.80165e-06	-2.68446e-05
0.35968	0.0954975	-0.000397151	-0.000239464	-7.17384e-05	9.0328e-06	-2.66364e-05
0.35995	0.0958562	-0.000396214	-0.000240057	-7.19186e-05	9.26526e-06	-2.64264e-05
0.36023	0.0962139	-0.000395236	-0.000240648	-7.2097e-05	9.49903e-06	-2.62146e-05
0.3605	0.0965706	-0.000394218	-0.000241239	-7.22737e-05	9.73412e-06	-2.6001e-05
0.36077	0.0969263	-0.000393159	-0.000241827	-7.24487e-05	9.97054e-06	-2.57854e-05
0.36105	0.097281	-0.000392058	-0.000242415	-7.26219e-05	1.02083e-05	-2.55681e-05
0.36132	0.0976347	-0.000390917	-0.000243	-7.27932e-05	1.04474e-05	-2.53489e-05
0.36159	0.0979874	-0.000389733	-0.000243585	-7.29628e-05	1.06878e-05	-2.51278e-05
0.36186	0.098339	-0.000388507	-0.000244168	-7.31305e-05	1.09295e-05	-2.49048e-05
0.36213	0.0986896	-0.00038724	-0.000244749	-7.32964e-05	1.11726e-05	-2.468e-05
0.36241	0.0990391	-0.000385929	-0.000245329	-7.34604e-05	1.14171e-05	-2.44533e-05
0.36267	0.0993875	-0.000384576	-0.000245907	-7.36226e-05	1.16629e-05	-2.42247e-05
0.36294	0.0997349	-0.000383181	-0.000246484	-7.37829e-05	1.191e-05	-2.39942e-05
0.36321	0.100081	-0.000381742	-0.000247059	-7.39413e-05	1.21585e-05	-2.37617e-05
0.36348	0.100426	-0.00038026	-0.000247632	-7.40978e-05	1.24084e-05	-2.35274e-05
0.36375	0.10077	-0.000378734	-0.000248204	-7.42524e-05	1.26597e-05	-2.32911e-05
0.36402	0.101113	-0.000377165	-0.000248775	-7.44051e-05	1.29124e-05	-2.30529e-05
0.3643	0.101455	-0.000375552	-0.000249343	-7.45558e-05	1.31664e-05	-2.28127e-05
0.36457	0.101796	-0.000373895	-0.00024991	-7.47046e-05	1.34218e-05	-2.25706e-05
0.36484	0.102135	-0.000372193	-0.000250476	-7.48515e-05	1.36786e-05	-2.23266e-05
0.36512	0.102474	-0.000370446	-0.00025104	-7.49963e-05	1.39368e-05	-2.20805e-05
0.36539	0.102811	-0.000368654	-0.000251602	-7.51392e-05	1.41964e-05	-2.18325e-05
0.36567	0.103147	-0.000366817	-0.000252162	-7.528e-05	1.44574e-05	-2.15826e-05
0.36594	0.103482	-0.000364935	-0.000252721	-7.54188e-05	1.47199e-05	-2.13306e-05
0.36621	0.103815	-0.000363006	-0.000253278	-7.55556e-05	1.49837e-05	-2.10766e-05
0.36649	0.104148	-0.000361031	-0.000253833	-7.56903e-05	1.5249e-05	-2.08206e-05
0.36676	0.104479	-0.00035901	-0.000254386	-7.58229e-05	1.55156e-05	-2.05627e-05
0.36702	0.104808	-0.000356942	-0.000254938	-7.59535e-05	1.57838e-05	-2.03026e-05
0.36728	0.105137	-0.000354827	-0.000255488	-7.60819e-05	1.60533e-05	-2.00406e-05
0.36755	0.105464	-0.000352664	-0.000256035	-7.62082e-05	1.63243e-05	-1.97765e-05
0.36781	0.10579	-0.000350454	-0.000256582	-7.63324e-05	1.65967e-05	-1.95104e-05
0.36807	0.106115	-0.000348195	-0.000257126	-7.64544e-05	1.68706e-05	-1.92422e-05
0.36835	0.106438	-0.000345889	-0.000257668	-7.65742e-05	1.7146e-05	-1.8972e-05
0.36862	0.10676	-0.000343534	-0.000258209	-7.66918e-05	1.74227e-05	-1.86997e-05
0.36889	0.10708	-0.00034113	-0.000258747	-7.68072e-05	1.7701e-05	-1.84253e-05
0.36917	0.1074	-0.000338676	-0.000259284	-7.69204e-05	1.79807e-05	-1.81488e-05
0.36944	0.107717	-0.000336174	-0.000259818	-7.70313e-05	1.82619e-05	-1.78703e-05
0.36971	0.108034	-0.000333622	-0.000260351	-7.714e-05	1.85446e-05	-1.75896e-05
0.36998	0.108349	-0.000331021	-0.000260882	-7.72465e-05	1.88287e-05	-1.73068e-05
0.37025	0.108663	-0.000328369	-0.00026141	-7.73507e-05	1.91144e-05	-1.70219e-05
0.37052	0.108975	-0.000325668	-0.000261937	-7.74526e-05	1.94015e-05	-1.67349e-05
0.37079	0.109285	-0.000322916	-0.000262462	-7.75522e-05	1.96902e-05	-1.64458e-05
0.37106	0.109595	-0.000320114	-0.000262984	-7.76496e-05	1.99803e-05	-1.61545e-05
0.37133	0.109903	-0.00031726	-0.000263505	-7.77446e-05	2.02719e-05	-1.58611e-05
0.3716	0.110209	-0.000314356	-0.000264024	-7.78373e-05	2.05651e-05	-1.55655e-05
0.37188	0.110514	-0.000311401	-0.00026454	-7.79276e-05	2.08598e-05	-1.52677e-05
0.37215	0.110818	-0.000308394	-0.000265054	-7.80156e-05	2.11559e-05	-1.49678e-05
0.37242	0.11112	-0.000305336	-0.000265567	-7.81013e-05	2.14537e-05	-1.46656e-05
0.3727	0.11142	-0.000302226	-0.000266077	-7.81846e-05	2.17529e-05	-1.43613e-05
0.37297	0.111719	-0.000299064	-0.000266585	-7.82655e-05	2.20537e-05	-1.40548e-05
0.37325	0.112017	-0.00029585	-0.000267091	-7.83441e-05	2.23561e-05	-1.37461e-05
0.37352	0.112313	-0.000292583	-0.000267595	-7.84203e-05	2.266e-05	-1.34352e-05
0.37379	0.112608	-0.000289264	-0.000268097	-7.8494e-05	2.29654e-05	-1.3122e-05
0.37407	0.112901	-0.000285892	-0.000268596	-7.85653e-05	2.32724e-05	-1.28066e-05
0.37434	0.113192	-0.000282467	-0.000269093	-7.86343e-05	2.3581e-05	-1.2489e-05
0.37462	0.113482	-0.000278988	-0.000269588	-7.87007e-05	2.38911e-05	-1.21691e-05
0.37489	0.113771	-0.000275457	-0.000270081	-7.87647e-05	2.42028e-05	-1.1847e-05
0.37516	0.114058	-0.000271871	-0.000270572	-7.88263e-05	2.45161e-05	-1.15226e-05
0.37544	0.114343	-0.000268232	-0.00027106	-7.88854e-05	2.4831e-05	-1.11959e-05
0.37571	0.114627	-0.000264538	-0.000271547	-7.8942e-05	2.51474e-05	-1.08669e-05
0.37598	0.114909	-0.000260791	-0.000272031	-7.89961e-05	2.54655e-05	-1.05357e-05
0.37626	0.115189	-0.000256989	-0.000272512	-7.90477e-05	2.57851e-05	-1.02022e-05
0.37653	0.115468	-0.000253133	-0.000272992	-7.90968e-05	2.61064e-05	-9.86634e-06
0.3768	0.115746	-0.000249222	-0.000273469	-7.91435e-05	2.64293e-05	-9.52819e-06
0.37708	0.116022	-0.000245256	-0.000273944	-7.91876e-05	2.67537e-05	-9.18773e-06
0.37735	0.116296	-0.000241236	-0.000274416	-7.92292e-05	2.70798e-05	-8.84494e-06
0.37762	0.116569	-0.00023716	-0.000274886	-7.92682e-05	2.74076e-05	-8.49982e-06
0.3779	0.11684	-0.000233028	-0.000275354	-7.93047e-05	2.77369e-05	-8.15235e-06
0.37818	0.117109	-0.000228841	-0.000275819	-7.93387e-05	2.80679e-05	-7.80253e-06
0.37846	0.117377	-0.000224598	-0.000276283	-7.937e-05	2.84006e-05	-7.45035e-06
0.37873	0.117643	-0.000220298	-0.000276743	-7.93988e-05	2.87348e-05	-7.09579e-06
0.379	0.117907	-0.000215942	-0.000277202	-7.94249e-05	2.90708e-05	-6.73886e-06
0.37928	0.11817	-0.000211529	-0.000277657	-7.94485e-05	2.94084e-05	-6.37954e-06
0.37955	0.118431	-0.000207059	-0.000278111	-7.94694e-05	2.97476e-05	-6.01782e-06
0.37982	0.118691	-0.000202532	-0.000278562	-7.94876e-05	3.00885e-05	-5.65369e-06
0.38009	0.118948	-0.000197947	-0.00027901	-7.95031e-05	3.04311e-05	-5.28714e-06
0.38036	0.119204	-0.000193303	-0.000279456	-7.9516e-05	3.07754e-05	-4.91817e-06
0.38063	0.119458	-0.000188601	-0.0002799	-7.95261e-05	3.11214e-05	-4.54677e-06
0.38092	0.119711	-0.00018384	-0.000280341	-7.95335e-05	3.1469e-05	-4.17292e-06
0.3812	0.119961	-0.00017902	-0.000280779	-7.95381e-05	3.18184e-05	-3.79662e-06
0.38147	0.12021	-0.000174141	-0.000281215	-7.954e-05	3.21694e-05	-3.41786e-06
0.38176	0.120457	-0.000169201	-0.000281648	-7.9539e-05	3.25221e-05	-3.03662e-06
0.38204	0.120702	-0.000164201	-0.000282078	-7.95352e-05	3.28766e-05	-2.6529e-06
0.38231	0.120945	-0.00015914	-0.000282506	-7.95286e-05	3.32328e-05	-2.26668e-06
0.38259	0.121186	-0.000154019	-0.000282931	-7.95191e-05	3.35907e-05	-1.87797e-06
0.38286	0.121426	-0.000148836	-0.000283353	-7.95068e-05	3.39503e-05	-1.48674e-06
0.38313	0.121663	-0.000143592	-0.000283773	-7.94916e-05	3.43117e-05	-1.09299e-06
0.38339	0.121899	-0.000138286	-0.00028419	-7.94734e-05	3.46748e-05	-6.96714e-07
0.38366	0.122132	-0.000132917	-0.000284604	-7.94524e-05	3.50396e-05	-2.97896e-07
0.38394	0.122364	-0.000127487	-0.000285015	-7.94284e-05	3.54062e-05	1.03472e-07
0.38422	0.122594	-0.000121993	-0.000285424	-7.94014e-05	3.57746e-05	5.07402e-07
0.38449	0.122822	-0.000116437	-0.00028583	-7.93714e-05	3.61447e-05	9.13903e-07
0.38477	0.123047	-0.000110816	-0.000286233	-7.93385e-05	3.65166e-05	1.32299e-06
0.38504	0.123271	-0.000105131	-0.000286633	-7.93025e-05	3.68903e-05	1.73466e-06
0.38532	0.123493	-9.93821e-05	-0.00028703	-7.92634e-05	3.72657e-05	2.14894e-06
0.38559	0.123712	-9.3568e-05	-0.000287424	-7.92212e-05	3.76429e-05	2.56584e-06
0.38586	0.12393	-8.76886e-05	-0.000287815	-7.9176e-05	3.8022e-05	2.98536e-06
0.38614	0.124145	-8.17434e-05	-0.000288203	-7.91276e-05	3.84028e-05	3.40751e-06
0.38641	0.124358	-7.57323e-05	-0.000288588	-7.90761e-05	3.87854e-05	3.83231e-06
0.38669	0.124569	-6.96547e-05	-0.00028897	-7.90214e-05	3.91699e-05	4.25977e-06
0.38696	0.124778	-6.35103e-05	-0.000289349	-7.89635e-05	3.95561e-05	4.68989e-06
0.38723	0.124985	-5.72986e-05	-0.000289725	-7.89024e-05	3.99442e-05	5.12269e-06
0.38751	0.125189	-5.10193e-05	-0.000290098	-7.8838e-05	4.03341e-05	5.55818e-06
0.38778	0.125392	-4.46718e-05	-0.000290468	-7.87704e-05	4.07258e-05	5.99636e-06
0.38805	0.125592	-3.82558e-05	-0.000290834	-7.86995e-05	4.11194e-05	6.43725e-06
0.38833	0.125789	-3.1771e-05	-0.000291197	-7.86253e-05	4.15148e-05	6.88086e-06
0.3886	0.125985	-2.52169e-05	-0.000291557	-7.85477e-05	4.19121e-05	7.32719e-06
0.38888	0.126178	-1.85933e-05	-0.000291914	-7.84668e-05	4.23112e-05	7.77626e-06
0.38915	0.126369	-1.18996e-05	-0.000292268	-7.83826e-05	4.27122e-05	8.22808e-06
0.38943	0.126557	-5.1357e-06	-0.000292618	-7.82949e-05	4.31151e-05	8.68265e-06
0.3897	0.126743	1.6988e-06	-0.000292965	-7.82038e-05	4.35198e-05	9.14e-06
0.38998	0.126927	8.60422e-06	-0.000293309	-7.81093e-05	4.39264e-05	9.60011e-06
0.39025	0.127108	1.5581e-05	-0.000293649	-7.80114e-05	4.43349e-05	1.0063e-05
0.39052	0.127287	2.26294e-05	-0.000293986	-7.791e-05	4.47453e-05	1.05287e-05
0.3908	0.127464	2.97502e-05	-0.00029432	-7.7805e-05	4.51576e-05	1.09972e-05
0.39107	0.127638	3.69437e-05	-0.00029465	-7.76966e-05	4.55718e-05	1.14686e-05
0.39134	0.127809	4.42104e-05	-0.000294976	-7.75846e-05	4.59879e-05	1.19427e-05
0.39161	0.127978	5.15508e-05	-0.000295299	-7.7469e-05	4.64059e-05	1.24197e-05
0.39189	0.128145	5.89655e-05	-0.000295619	-7.73497e-05	4.68258e-05	1.28996e-05
0.39217	0.128308	6.64549e-05	-0.000295935	-7.72269e-05	4.72477e-05	1.33823e-05
0.39244	0.12847	7.40197e-05	-0.000296247	-7.71003e-05	4.76715e-05	1.38679e-05
0.39272	0.128628	8.16603e-05	-0.000296556	-7.697e-05	4.80972e-05	1.43564e-05
0.393	0.128784	8.93771e-05	-0.000296861	-7.6836e-05	4.85249e-05	1.48477e-05
0.39327	0.128938	9.71707e-05	-0.000297163	-7.66982e-05	4.89545e-05	1.5342e-05
0.39354	0.129088	0.000105041	-0.00029746	-7.65566e-05	4.93861e-05	1.58393e-05
0.39381	0.129236	0.00011299	-0.000297754	-7.64112e-05	4.98196e-05	1.63394e-05
0.39408	0.129381	0.000121017	-0.000298045	-7.62619e-05	5.02551e-05	1.68425e-05
0.39436	0.129523	0.000129123	-0.000298331	-7.61087e-05	5.06926e-05	1.73485e-05
0.39462	0.129663	0.000137309	-0.000298613	-7.59516e-05	5.11321e-05	1.78575e-05
0.39489	0.129799	0.000145575	-0.000298892	-7.57905e-05	5.15736e-05	1.83695e-05
0.39515	0.129933	0.000153921	-0.000299167	-7.56254e-05	5.2017e-05	1.88845e-05
0.39542	0.130064	0.000162348	-0.000299437	-7.54563e-05	5.24625e-05	1.94025e-05
0.39569	0.130192	0.000170856	-0.000299704	-7.52831e-05	5.29099e-05	1.99235e-05
0.39596	0.130317	0.000179446	-0.000299967	-7.51059e-05	5.33594e-05	2.04475e-05
0.39624	0.130439	0.000188118	-0.000300225	-7.49246e-05	5.38109e-05	2.09745e-05
0.39651	0.130558	0.000196873	-0.00030048	-7.47392e-05	5.42644e-05	2.15046e-05
0.39679	0.130674	0.000205711	-0.000300731	-7.45497e-05	5.47199e-05	2.20378e-05
0.39706	0.130787	0.000214632	-0.000300977	-7.4356e-05	5.51775e-05	2.2574e-05
0.39733	0.130896	0.000223636	-0.000301219	-7.41581e-05	5.56371e-05	2.31133e-05
0.39759	0.131003	0.000232725	-0.000301457	-7.3956e-05	5.60988e-05	2.36557e-05
0.39783	0.131107	0.000241899	-0.000301691	-7.37497e-05	5.65625e-05	2.42011e-05
0.39808	0.131208	0.000251158	-0.000301921	-7.35391e-05	5.70283e-05	2.47497e-05
0.39836	0.131305	0.000260502	-0.000302147	-7.33243e-05	5.74962e-05	2.53015e-05
0.39863	0.131399	0.000269933	-0.000302368	-7.31051e-05	5.79661e-05	2.58563e-05
0.39891	0.131491	0.000279449	-0.000302585	-7.28816e-05	5.84381e-05	2.64143e-05
0.39918	0.131579	0.000289053	-0.000302797	-7.26538e-05	5.89122e-05	2.69755e-05
0.39946	0.131663	0.000298743	-0.000303005	-7.24216e-05	5.93884e-05	2.75398e-05
0.39973	0.131745	0.000308521	-0.000303209	-7.2185e-05	5.98667e-05	2.81073e-05
0.40001	0.131823	0.000318386	-0.000303409	-7.1944e-05	6.03472e-05	2.8678e-05
0.40028	0.131898	0.00032834	-0.000303604	-7.16986e-05	6.08297e-05	2.92519e-05
0.40055	0.13197	0.000338383	-0.000303794	-7.14487e-05	6.13143e-05	2.98291e-05
0.40083	0.132038	0.000348514	-0.00030398	-7.11943e-05	6.18011e-05	3.04094e-05
0.4011	0.132103	0.000358735	-0.000304162	-7.09354e-05	6.229e-05	3.0993e-05
0.40138	0.132165	0.000369046	-0.000304339	-7.0672e-05	6.27811e-05	3.15798e-05
0.40165	0.132224	0.000379447	-0.000304511	-7.04041e-05	6.32743e-05	3.21699e-05
0.40192	0.132279	0.000389939	-0.000304679	-7.01316e-05	6.37696e-05	3.27633e-05
0.4022	0.13233	0.000400521	-0.000304843	-6.98545e-05	6.42671e-05	3.33599e-05
0.40247	0.132378	0.000411194	-0.000305001	-6.95728e-05	6.47668e-05	3.39598e-05
0.40275	0.132423	0.000421958	-0.000305156	-6.92866e-05	6.52686e-05	3.45631e-05
0.40302	0.132465	0.000432813	-0.000305305	-6.89957e-05	6.57727e-05	3.51696e-05
0.4033	0.132503	0.00044376	-0.00030545	-6.87003e-05	6.62789e-05	3.57795e-05
0.40357	0.132537	0.0004548	-0.00030559	-6.84002e-05	6.67873e-05	3.63927e-05
0.40385	0.132568	0.000465932	-0.000305725	-6.80954e-05	6.72979e-05	3.70092e-05
0.40412	0.132596	0.000477157	-0.000305856	-6.77859e-05	6.78107e-05	3.76291e-05
0.4044	0.13262	0.000488475	-0.000305982	-6.74717e-05	6.83257e-05	3.82524e-05
0.40467	0.132641	0.000499887	-0.000306103	-6.71527e-05	6.8843e-05	3.8879e-05
0.40494	0.132658	0.000511394	-0.000306219	-6.6829e-05	6.93624e-05	3.9509e-05
0.40521	0.132671	0.000522995	-0.000306331	-6.65004e-05	6.98841e-05	4.01425e-05
0.40549	0.132681	0.000534692	-0.000306438	-6.61671e-05	7.04081e-05	4.07793e-05
0.40575	0.132687	0.000546484	-0.000306539	-6.58289e-05	7.09342e-05	4.14196e-05
0.40602	0.13269	0.000558373	-0.000306636	-6.54858e-05	7.14627e-05	4.20634e-05
0.40629	0.132689	0.000570358	-0.000306728	-6.51377e-05	7.19934e-05	4.27106e-05
0.40656	0.132684	0.000582441	-0.000306814	-6.47848e-05	7.25263e-05	4.33612e-05
0.40681	0.132676	0.000594622	-0.000306896	-6.44268e-05	7.30616e-05	4.40154e-05
0.40708	0.132663	0.000606901	-0.000306972	-6.40639e-05	7.35991e-05	4.4673e-05
0.40735	0.132647	0.00061928	-0.000307044	-6.36958e-05	7.41389e-05	4.53341e-05
0.40762	0.132627	0.000631758	-0.00030711	-6.33227e-05	7.4681e-05	4.59988e-05
0.40788	0.132604	0.000644337	-0.000307171	-6.29445e-05	7.52254e-05	4.6667e-05
0.40816	0.132576	0.000657016	-0.000307227	-6.25611e-05	7.57721e-05	4.73387e-05
0.40844	0.132544	0.000669796	-0.000307277	-6.21725e-05	7.63212e-05	4.8014e-05
0.40871	0.132509	0.000682678	-0.000307322	-6.17788e-05	7.68725e-05	4.86929e-05
0.40899	0.132469	0.000695662	-0.000307362	-6.13798e-05	7.74262e-05	4.93753e-05
0.40926	0.132426	0.000708748	-0.000307397	-6.09756e-05	7.79822e-05	5.00614e-05
0.40953	0.132378	0.000721936	-0.000307426	-6.05662e-05	7.85406e-05	5.0751e-05
0.4098	0.132327	0.000735228	-0.00030745	-6.01515e-05	7.91013e-05	5.14443e-05
0.41006	0.132272	0.000748623	-0.000307468	-5.97314e-05	7.96643e-05	5.21412e-05
0.41033	0.132212	0.000762122	-0.000307481	-5.93061e-05	8.02298e-05	5.28417e-05
0.41058	0.132149	0.000775726	-0.000307489	-5.88753e-05	8.07976e-05	5.35459e-05
0.41085	0.132081	0.000789435	-0.00030749	-5.84392e-05	8.13678e-05	5.42538e-05
0.41111	0.132009	0.00080325	-0.000307487	-5.79976e-05	8.19403e-05	5.49653e-05
0.41137	0.131933	0.00081717	-0.000307478	-5.75506e-05	8.25153e-05	5.56806e-05
0.41164	0.131853	0.000831198	-0.000307463	-5.70981e-05	8.30927e-05	5.63995e-05
0.41192	0.131769	0.000845332	-0.000307442	-5.66401e-05	8.36724e-05	5.71222e-05
0.41219	0.13168	0.000859574	-0.000307416	-5.61765e-05	8.42546e-05	5.78486e-05
0.41247	0.131588	0.000873923	-0.000307384	-5.57074e-05	8.48392e-05	5.85788e-05
0.41274	0.131491	0.000888381	-0.000307346	-5.52328e-05	8.54262e-05	5.93127e-05
0.41301	0.131389	0.000902946	-0.000307303	-5.47525e-05	8.60157e-05	6.00503e-05
0.41329	0.131284	0.000917621	-0.000307253	-5.42667e-05	8.66076e-05	6.07917e-05
0.41356	0.131174	0.000932404	-0.000307198	-5.37752e-05	8.72019e-05	6.15369e-05
0.41383	0.131059	0.000947298	-0.000307137	-5.3278e-05	8.77986e-05	6.22859e-05
0.41411	0.130941	0.0009623	-0.00030707	-5.27751e-05	8.83977e-05	6.30387e-05
0.41438	0.130818	0.000977413	-0.000306998	-5.22666e-05	8.89993e-05	6.37952e-05
0.41465	0.13069	0.000992635	-0.000306919	-5.17523e-05	8.96034e-05	6.45556e-05
0.41493	0.130558	0.00100797	-0.000306834	-5.12323e-05	9.02098e-05	6.53197e-05
0.4152	0.130422	0.00102341	-0.000306744	-5.07066e-05	9.08187e-05	6.60877e-05
0.41547	0.130281	0.00103896	-0.000306647	-5.01752e-05	9.14301e-05	6.68595e-05
0.41575	0.130136	0.00105463	-0.000306544	-4.9638e-05	9.20438e-05	6.76351e-05
0.41602	0.129986	0.0010704	-0.000306436	-4.90951e-05	9.266e-05	6.84145e-05
0.4163	0.129832	0.00108628	-0.000306321	-4.85465e-05	9.32787e-05	6.91977e-05
0.41657	0.129674	0.00110228	-0.0003062	-4.79921e-05	9.38997e-05	6.99847e-05
0.41684	0.129511	0.00111838	-0.000306073	-4.7432e-05	9.45232e-05	7.07755e-05
0.4171	0.129343	0.0011346	-0.00030594	-4.6866e-05	9.51491e-05	7.15702e-05
0.41734	0.129171	0.00115092	-0.000305801	-4.62943e-05	9.57774e-05	7.23686e-05
0.41758	0.128994	0.00116736	-0.000305656	-4.57167e-05	9.64082e-05	7.31709e-05
0.41784	0.128813	0.00118391	-0.000305504	-4.51333e-05	9.70413e-05	7.39771e-05
0.41809	0.128627	0.00120057	-0.000305346	-4.45441e-05	9.76769e-05	7.4787e-05
0.41835	0.128437	0.00121734	-0.000305182	-4.3949e-05	9.83149e-05	7.56008e-05
0.41863	0.128242	0.00123422	-0.000305012	-4.3348e-05	9.89553e-05	7.64185e-05
0.4189	0.128042	0.00125121	-0.000304835	-4.27412e-05	9.95981e-05	7.72399e-05
0.41917	0.127838	0.00126832	-0.000304652	-4.21285e-05	0.000100243	7.80652e-05
0.41943	0.127629	0.00128553	-0.000304463	-4.15099e-05	0.000100891	7.88943e-05
0.4197	0.127416	0.00130286	-0.000304267	-4.08854e-05	0.000101541	7.97272e-05
0.41996	0.127197	0.0013203	-0.000304065	-4.0255e-05	0.000102193	8.0564e-05
0.42023	0.126974	0.00133785	-0.000303857	-3.96187e-05	0.000102848	8.14045e-05
0.42049	0.126747	0.00135551	-0.000303642	-3.89765e-05	0.000103505	8.22488e-05
0.42076	0.126514	0.00137328	-0.000303421	-3.83284e-05	0.000104164	8.3097e-05
0.42102	0.126277	0.00139116	-0.000303193	-3.76744e-05	0.000104826	8.39489e-05
0.42129	0.126035	0.00140915	-0.000302958	-3.70144e-05	0.00010549	8.48047e-05
0.42155	0.125788	0.00142726	-0.000302718	-3.63485e-05	0.000106157	8.56642e-05
0.42182	0.125537	0.00144547	-0.00030247	-3.56767e-05	0.000106825	8.65275e-05
0.42208	0.12528	0.0014638	-0.000302216	-3.4999e-05	0.000107496	8.73946e-05
0.42235	0.125019	0.00148223	-0.000301956	-3.43154e-05	0.00010817	8.82655e-05
0.42261	0.124754	0.00150077	-0.000301689	-3.36259e-05	0.000108845	8.91401e-05
0.42287	0.124483	0.00151943	-0.000301415	-3.29304e-05	0.000109523	9.00185e-05
0.42314	0.124208	0.00153819	-0.000301134	-3.22291e-05	0.000110204	9.09007e-05
0.4234	0.123927	0.00155706	-0.000300848	-3.15219e-05	0.000110886	9.17866e-05
0.42367	0.123642	0.00157604	-0.000300554	-3.08087e-05	0.000111571	9.26763e-05
0.42394	0.123352	0.00159513	-0.000300254	-3.00897e-05	0.000112258	9.35698e-05
0.42421	0.123058	0.00161433	-0.000299947	-2.93647e-05	0.000112947	9.4467e-05
0.42448	0.122758	0.00163364	-0.000299633	-2.86339e-05	0.000113639	9.53679e-05
0.42475	0.122454	0.00165306	-0.000299313	-2.78971e-05	0.000114333	9.62726e-05
0.42502	0.122145	0.00167258	-0.000298986	-2.71545e-05	0.000115029	9.71811e-05
0.42529	0.121831	0.00169221	-0.000298652	-2.6406e-05	0.000115727	9.80932e-05
0.42556	0.121512	0.00171195	-0.000298311	-2.56516e-05	0.000116428	9.90091e-05
0.42583	0.121188	0.0017318	-0.000297964	-2.48914e-05	0.00011713	9.99287e-05
0.4261	0.12086	0.00175175	-0.00029761	-2.41253e-05	0.000117835	0.000100852
0.42637	0.120526	0.00177181	-0.000297249	-2.33534e-05	0.000118542	0.000101779
0.42664	0.120188	0.00179197	-0.000296881	-2.25758e-05	0.000119251	0.000102709
0.42691	0.119845	0.00181224	-0.000296506	-2.17923e-05	0.000119963	0.000103644
0.42717	0.119497	0.00183262	-0.000296125	-2.10031e-05	0.000120676	0.000104582
0.42744	0.119144	0.00185309	-0.000295737	-2.02082e-05	0.000121392	0.000105523
0.42771	0.118787	0.00187367	-0.000295342	-1.94075e-05	0.000122109	0.000106468
0.42798	0.118425	0.00189435	-0.00029494	-1.86011e-05	0.000122829	0.000107417
0.42824	0.118057	0.00191514	-0.000294532	-1.77891e-05	0.000123551	0.000108369
0.42851	0.117686	0.00193602	-0.000294116	-1.69714e-05	0.000124275	0.000109325
0.42878	0.117309	0.00195701	-0.000293694	-1.61481e-05	0.000125	0.000110284
0.42904	0.116927	0.00197809	-0.000293265	-1.53192e-05	0.000125728	0.000111247
0.42931	0.116541	0.00199927	-0.000292829	-1.44848e-05	0.000126458	0.000112213
0.42958	0.11615	0.00202055	-0.000292386	-1.36448e-05	0.00012719	0.000113183
0.42984	0.115755	0.00204193	-0.000291937	-1.27993e-05	0.000127924	0.000114156
0.43011	0.115354	0.00206341	-0.000291481	-1.19482e-05	0.000128659	0.000115133
0.43036	0.114949	0.00208498	-0.000291017	-1.10916e-05	0.000129397	0.000116114
0.43062	0.114539	0.00210665	-0.000290547	-1.02296e-05	0.000130136	0.000117097
0.43088	0.114124	0.00212842	-0.00029007	-9.36201e-06	0.000130878	0.000118084
0.43115	0.113705	0.00215028	-0.000289586	-8.48895e-06	0.000131621	0.000119075
0.43142	0.11328	0.00217224	-0.000289095	-7.61042e-06	0.000132366	0.000120069
0.43168	0.112851	0.0021943	-0.000288597	-6.72643e-06	0.000133113	0.000121066
0.43195	0.112417	0.00221644	-0.000288092	-5.837e-06	0.000133862	0.000122067
0.43222	0.111978	0.00223869	-0.00028758	-4.94214e-06	0.000134613	0.000123071
0.43249	0.111535	0.00226102	-0.000287061	-4.04184e-06	0.000135365	0.000124078
0.43275	0.111087	0.00228345	-0.000286535	-3.13612e-06	0.00013612	0.000125089
0.43302	0.110634	0.00230597	-0.000286002	-2.22498e-06	0.000136876	0.000126103
0.43329	0.110176	0.00232859	-0.000285462	-1.30844e-06	0.000137634	0.000127121
0.43355	0.109713	0.00235129	-0.000284915	-3.86492e-07	0.000138393	0.000128141
0.43382	0.109245	0.00237409	-0.000284361	5.40844e-07	0.000139154	0.000129165
0.43409	0.108773	0.00239698	-0.0002838	1.47356e-06	0.000139917	0.000130193
0.43433	0.108295	0.00241996	-0.000283231	2.41164e-06	0.000140682	0.000131223
0.43457	0.107813	0.00244303	-0.000282655	3.35507e-06	0.000141449	0.000132257
0.43482	0.107326	0.00246619	-0.000282073	4.30382e-06	0.000142217	0.000133294
0.43506	0.106834	0.00248944	-0.000281483	5.25787e-06	0.000142986	0.000134334
0.4353	0.106338	0.00251278	-0.000280886	6.21722e-06	0.000143758	0.000135377
0.43554	0.105836	0.0025362	-0.000280281	7.18185e-06	0.000144531	0.000136424
0.43578	0.10533	0.00255972	-0.00027967	8.15178e-06	0.000145305	0.000137474
0.43602	0.104819	0.00258332	-0.000279051	9.127e-06	0.000146081	0.000138527
0.43626	0.104302	0.002607	-0.000278425	1.01075e-05	0.000146859	0.000139583
0.4365	0.103781	0.00263078	-0.000277792	1.10933e-05	0.000147638	0.000140642
0.43675	0.103255	0.00265464	-0.000277151	1.20843e-05	0.000148419	0.000141704
0.43702	0.102725	0.00267859	-0.000276503	1.30807e-05	0.000149201	0.00014277
0.43727	0.102189	0.00270263	-0.000275848	1.40823e-05	0.000149985	0.000143838
0.43752	0.101648	0.00272675	-0.000275185	1.50892e-05	0.000150771	0.00014491
0.43779	0.101102	0.00275095	-0.000274515	1.61013e-05	0.000151558	0.000145985
0.43805	0.100552	0.00277524	-0.000273838	1.71186e-05	0.000152346	0.000147063
0.43832	0.0999964	0.00279962	-0.000273153	1.81411e-05	0.000153136	0.000148144
0.43858	0.099436	0.00282408	-0.000272461	1.91688e-05	0.000153927	0.000149227
0.43885	0.0988707	0.00284861	-0.000271761	2.02017e-05	0.000154719	0.000150314
0.43911	0.0983004	0.00287323	-0.000271054	2.12396e-05	0.000155513	0.000151404
0.43937	0.0977252	0.00289794	-0.000270339	2.22826e-05	0.000156309	0.000152497
0.43964	0.0971451	0.00292272	-0.000269617	2.33308e-05	0.000157105	0.000153593
0.4399	0.0965602	0.00294757	-0.000268888	2.43839e-05	0.000157903	0.000154691
0.44016	0.0959703	0.00297251	-0.000268151	2.5442e-05	0.000158702	0.000155793
0.44043	0.0953755	0.00299752	-0.000267407	2.65051e-05	0.000159503	0.000156897
0.44069	0.0947759	0.00302261	-0.000266655	2.75731e-05	0.000160304	0.000158004
0.44095	0.0941714	0.00304777	-0.000265896	2.8646e-05	0.000161107	0.000159114
0.44122	0.0935621	0.00307301	-0.000265129	2.97236e-05	0.000161911	0.000160227
0.44148	0.0929481	0.00309832	-0.000264355	3.0806e-05	0.000162716	0.000161342
0.44174	0.0923292	0.00312369	-0.000263573	3.18932e-05	0.000163522	0.00016246
0.44201	0.0917055	0.00314914	-0.000262784	3.2985e-05	0.000164329	0.000163581
0.44227	0.091077	0.00317466	-0.000261987	3.40816e-05	0.000165137	0.000164704
0.44253	0.0904438	0.00320024	-0.000261183	3.51827e-05	0.000165946	0.00016583
0.44279	0.0898057	0.00322589	-0.000260372	3.62885e-05	0.000166756	0.000166959
0.44305	0.0891629	0.00325161	-0.000259553	3.7399e-05	0.000167567	0.00016809
0.44332	0.0885152	0.0032774	-0.000258726	3.8514e-05	0.000168379	0.000169223
0.44358	0.0878628	0.00330325	-0.000257892	3.96336e-05	0.000169192	0.000170359
0.44384	0.0872055	0.00332916	-0.00025705	4.07577e-05	0.000170006	0.000171498
0.4441	0.0865435	0.00335514	-0.000256201	4.18863e-05	0.000170821	0.000172639
0.44436	0.0858767	0.00338117	-0.000255344	4.30193e-05	0.000171636	0.000173782
0.44462	0.0852052	0.00340727	-0.000254479	4.41568e-05	0.000172452	0.000174928
0.44489	0.0845289	0.00343343	-0.000253608	4.52986e-05	0.000173269	0.000176076
0.44515	0.0838478	0.00345965	-0.000252728	4.64447e-05	0.000174086	0.000177226
0.44541	0.083162	0.00348592	-0.000251841	4.75952e-05	0.000174904	0.000178379
0.44567	0.0824715	0.00351225	-0.000250946	4.87499e-05	0.000175723	0.000179534
0.44593	0.0817762	0.00353864	-0.000250044	4.99089e-05	0.000176543	0.000180691
0.44619	0.0810763	0.00356508	-0.000249134	5.1072e-05	0.000177363	0.00018185
0.44645	0.0803715	0.00359157	-0.000248216	5.22393e-05	0.000178183	0.000183012
0.44671	0.0796621	0.00361812	-0.000247291	5.34108e-05	0.000179004	0.000184175
0.44697	0.078948	0.00364471	-0.000246358	5.45863e-05	0.000179826	0.000185341
0.44723	0.0782292	0.00367136	-0.000245418	5.57659e-05	0.000180647	0.000186508
0.44749	0.0775058	0.00369806	-0.00024447	5.69495e-05	0.00018147	0.000187678
0.44775	0.0767777	0.0037248	-0.000243514	5.8137e-05	0.000182292	0.00018885
0.44801	0.076045	0.00375159	-0.000242551	5.93284e-05	0.000183116	0.000190023
0.44827	0.0753076	0.00377843	-0.00024158	6.05238e-05	0.000183939	0.000191199
0.44853	0.0745655	0.00380531	-0.000240601	6.1723e-05	0.000184763	0.000192377
0.44879	0.0738189	0.00383223	-0.000239615	6.29261e-05	0.000185587	0.000193556
0.44905	0.0730676	0.0038592	-0.000238621	6.4133e-05	0.000186411	0.000194737
0.44931	0.0723116	0.00388622	-0.000237619	6.53438e-05	0.000187235	0.00019592
0.44957	0.071551	0.00391327	-0.000236609	6.65583e-05	0.00018806	0.000197105
0.44983	0.0707858	0.00394037	-0.000235592	6.77766e-05	0.000188885	0.000198292
0.45009	0.0700159	0.00396751	-0.000234567	6.89987e-05	0.00018971	0.000199481
0.45034	0.0692414	0.00399468	-0.000233535	7.02244e-05	0.000190535	0.000200671
0.4506	0.0684623	0.0040219	-0.000232494	7.14538e-05	0.000191361	0.000201863
0.45086	0.0676787	0.00404915	-0.000231446	7.26867e-05	0.000192186	0.000203057
0.45112	0.0668904	0.00407644	-0.00023039	7.39233e-05	0.000193012	0.000204252
0.45138	0.0660977	0.00410376	-0.000229327	7.51633e-05	0.000193837	0.000205449
0.45164	0.0653003	0.00413112	-0.000228255	7.64068e-05	0.000194663	0.000206648
0.45189	0.0644985	0.00415851	-0.000227176	7.76537e-05	0.000195488	0.000207848
0.45215	0.0636921	0.00418593	-0.000226089	7.89041e-05	0.000196313	0.00020905
0.45241	0.0628812	0.00421338	-0.000224995	8.01577e-05	0.000197138	0.000210253
0.45267	0.0620659	0.00424086	-0.000223892	8.14147e-05	0.000197963	0.000211458
0.45292	0.0612461	0.00426837	-0.000222782	8.26749e-05	0.000198788	0.000212664
0.45318	0.0604218	0.0042959	-0.000221664	8.39384e-05	0.000199613	0.000213872
0.45344	0.0595931	0.00432346	-0.000220539	8.5205e-05	0.000200437	0.000215081
0.4537	0.05876	0.00435104	-0.000219406	8.64748e-05	0.000201261	0.000216291
0.45395	0.0579225	0.00437865	-0.000218265	8.77476e-05	0.000202085	0.000217503
0.45421	0.0570806	0.00440628	-0.000217116	8.90234e-05	0.000202909	0.000218716
0.45447	0.0562344	0.00443393	-0.000215959	9.03022e-05	0.000203732	0.00021993
0.45472	0.0553838	0.0044616	-0.000214795	9.1584e-05	0.000204555	0.000221145
0.45498	0.0545289	0.00448929	-0.000213623	9.28687e-05	0.000205377	0.000222362
0.45524	0.0536696	0.00451699	-0.000212443	9.41562e-05	0.000206199	0.00022358
0.45549	0.052806	0.00454472	-0.000211256	9.54467e-05	0.000207021	0.000224799
0.45575	0.0519381	0.00457246	-0.00021006	9.674e-05	0.000207842	0.000226019
0.45601	0.0510658	0.00460021	-0.000208857	9.80361e-05	0.000208662	0.00022724
0.45626	0.0501893	0.00462798	-0.000207646	9.93349e-05	0.000209482	0.000228462
0.45652	0.0493084	0.00465577	-0.000206428	0.000100637	0.000210301	0.000229686
0.45677	0.0484232	0.00468356	-0.000205201	0.000101941	0.00021112	0.00023091
0.45703	0.0475337	0.00471137	-0.000203967	0.000103248	0.000211938	0.000232136
0.45728	0.04664	0.00473918	-0.000202724	0.000104557	0.000212756	0.000233362
0.45754	0.0457419	0.00476701	-0.000201474	0.000105869	0.000213572	0.000234589
0.45779	0.0448397	0.00479484	-0.000200216	0.000107184	0.000214388	0.000235817
0.45805	0.0439331	0.00482268	-0.000198951	0.000108501	0.000215203	0.000237046
0.4583	0.0430223	0.00485052	-0.000197677	0.000109821	0.000216018	0.000238276
0.45856	0.0421073	0.00487837	-0.000196396	0.000111143	0.000216831	0.000239506
0.45881	0.041188	0.00490622	-0.000195106	0.000112467	0.000217644	0.000240738
0.45907	0.0402645	0.00493408	-0.000193809	0.000113794	0.000218456	0.00024197
0.45932	0.0393368	0.00496193	-0.000192504	0.000115123	0.000219267	0.000243203
0.45958	0.0384048	0.00498979	-0.000191191	0.000116454	0.000220077	0.000244436
0.45983	0.0374687	0.00501765	-0.00018987	0.000117788	0.000220886	0.00024567
0.46009	0.0365284	0.00504551	-0.000188541	0.000119124	0.000221694	0.000246905
0.46034	0.0355839	0.00507336	-0.000187204	0.000120462	0.000222501	0.000248141
0.46059	0.0346352	0.00510121	-0.000185859	0.000121803	0.000223307	0.000249377
0.46085	0.0336823	0.00512906	-0.000184506	0.000123145	0.000224112	0.000250613
0.4611	0.0327253	0.00515691	-0.000183146	0.00012449	0.000224916	0.000251851
0.46136	0.031764	0.00518475	-0.000181777	0.000125836	0.000225719	0.000253088
0.46161	0.0307986	0.00521258	-0.0001804	0.000127185	0.00022652	0.000254327
0.46186	0.0298291	0.00524041	-0.000179015	0.000128536	0.000227321	0.000255565
0.46212	0.0288553	0.00526823	-0.000177623	0.000129889	0.00022812	0.000256805
0.46237	0.0278774	0.00529604	-0.000176222	0.000131244	0.000228918	0.000258044
0.46262	0.0268953	0.00532385	-0.000174813	0.000132601	0.000229715	0.000259285
0.46287	0.0259091	0.00535164	-0.000173396	0.00013396	0.000230511	0.000260525
0.46313	0.0249188	0.00537942	-0.000171971	0.00013532	0.000231305	0.000261766
0.46338	0.0239244	0.00540719	-0.000170538	0.000136683	0.000232098	0.000263007
0.46363	0.0229259	0.00543494	-0.000169097	0.000138047	0.00023289	0.000264249
0.46388	0.0219233	0.00546268	-0.000167648	0.000139413	0.00023368	0.00026549
0.46414	0.0209167	0.00549039	-0.000166191	0.00014078	0.000234469	0.000266732
0.46439	0.0199061	0.00551809	-0.000164726	0.00014215	0.000235256	0.000267974
0.46464	0.0188914	0.00554577	-0.000163252	0.00014352	0.000236042	0.000269217
0.46489	0.0178728	0.00557343	-0.000161771	0.000144892	0.000236826	0.000270459
0.46515	0.0168503	0.00560106	-0.000160282	0.000146266	0.000237609	0.000271701
0.4654	0.0158238	0.00562867	-0.000158784	0.000147641	0.000238389	0.000272943
0.46565	0.0147934	0.00565625	-0.000157279	0.000149017	0.000239169	0.000274185
0.4659	0.0137592	0.0056838	-0.000155766	0.000150395	0.000239946	0.000275427
0.46615	0.0127212	0.00571132	-0.000154245	0.000151773	0.000240722	0.000276669
0.4664	0.0116793	0.0057388	-0.000152715	0.000153153	0.000241495	0.000277911
0.46665	0.0106337	0.00576625	-0.000151178	0.000154533	0.000242267	0.000279152
0.46691	0.00958435	0.00579367	-0.000149633	0.000155915	0.000243037	0.000280393
0.46716	0.00853126	0.00582104	-0.00014808	0.000157297	0.000243805	0.000281634
0.46741	0.00747447	0.00584838	-0.000146519	0.00015868	0.000244571	0.000282874
0.46766	0.00641399	0.00587568	-0.00014495	0.000160064	0.000245335	0.000284114
0.46791	0.00534984	0.00590293	-0.000143373	0.000161449	0.000246097	0.000285354
0.46816	0.00428205	0.00593014	-0.000141788	0.000162834	0.000246856	0.000286593
0.46841	0.00321064	0.0059573	-0.000140195	0.00016422	0.000247614	0.000287831
0.46866	0.00213566	0.00598442	-0.000138594	0.000165606	0.000248369	0.000289068
0.46891	0.00105716	0.00601148	-0.000136985	0.000166992	0.000249122	0.000290305
0.46916	-2.48398e-05	0.00603849	-0.000135369	0.000168379	0.000249872	0.000291541
0.46941	-0.00111031	0.00606545	-0.000133744	0.000169766	0.00025062	0.000292777
0.46966	-0.00219921	0.00609234	-0.000132112	0.000171154	0.000251366	0.000294011
0.46991	-0.00329151	0.00611918	-0.000130472	0.000172541	0.000252109	0.000295244
0.47016	-0.00438716	0.00614596	-0.000128824	0.000173928	0.000252849	0.000296477
0.47041	-0.00548614	0.00617267	-0.000127168	0.000175315	0.000253587	0.000297708
0.47066	-0.00658843	0.00619932	-0.000125504	0.000176702	0.000254322	0.000298938
0.47091	-0.00769399	0.0062259	-0.000123833	0.000178088	0.000255054	0.000300167
0.47116	-0.00880279	0.00625241	-0.000122153	0.000179474	0.000255783	0.000301395
0.47141	-0.00991479	0.00627884	-0.000120466	0.00018086	0.00025651	0.000302621
0.47166	-0.01103	0.00630521	-0.000118772	0.000182245	0.000257233	0.000303846
0.47191	-0.0121483	0.0063315	-0.000117069	0.00018363	0.000257954	0.00030507
0.47216	-0.0132697	0.00635771	-0.000115359	0.000185014	0.000258672	0.000306292
0.47241	-0.0143941	0.00638384	-0.000113641	0.000186397	0.000259386	0.000307513
0.47265	-0.0155217	0.00640989	-0.000111915	0.00018778	0.000260098	0.000308732
0.4729	-0.0166522	0.00643586	-0.000110182	0.000189161	0.000260806	0.00030995
0.47315	-0.0177858	0.00646175	-0.00010844	0.000190542	0.000261511	0.000311166
0.4734	-0.0189223	0.00648755	-0.000106692	0.000191922	0.000262213	0.00031238
0.47365	-0.0200618	0.00651326	-0.000104935	0.0001933	0.000262912	0.000313593
0.4739	-0.0212042	0.00653888	-0.000103171	0.000194678	0.000263607	0.000314804
0.47414	-0.0223496	0.00656442	-0.000101399	0.000196054	0.000264299	0.000316013
0.47439	-0.0234978	0.00658986	-9.96189e-05	0.00019743	0.000264988	0.00031722
0.47464	-0.0246489	0.00661521	-9.78315e-05	0.000198803	0.000265673	0.000318426
0.47489	-0.0258027	0.00664046	-9.60364e-05	0.000200176	0.000266355	0.000319629
0.47514	-0.0269593	0.00666561	-9.42337e-05	0.000201547	0.000267033	0.000320831
0.47538	-0.0281187	0.00669067	-9.24234e-05	0.000202916	0.000267707	0.00032203
0.47563	-0.0292807	0.00671561	-9.06055e-05	0.000204284	0.000268378	0.000323227
0.47588	-0.0304453	0.00674046	-8.878e-05	0.00020565	0.000269045	0.000324422
0.47613	-0.0316125	0.00676519	-8.69469e-05	0.000207014	0.000269708	0.000325615
0.47637	-0.0327822	0.00678981	-8.51063e-05	0.000208375	0.000270368	0.000326805
0.47662	-0.0339545	0.00681432	-8.32582e-05	0.000209735	0.000271023	0.000327993
0.47687	-0.0351292	0.00683871	-8.14026e-05	0.000211093	0.000271675	0.000329178
0.47711	-0.0363063	0.00686299	-7.95395e-05	0.000212449	0.000272322	0.000330361
0.47736	-0.0374858	0.00688715	-7.76689e-05	0.000213802	0.000272966	0.000331541
0.47761	-0.0386676	0.00691118	-7.57909e-05	0.000215153	0.000273605	0.000332719
0.47785	-0.0398518	0.00693509	-7.39055e-05	0.000216501	0.00027424	0.000333894
0.4781	-0.0410381	0.00695888	-7.20127e-05	0.000217846	0.000274871	0.000335066
0.47835	-0.0422267	0.00698254	-7.01125e-05	0.000219189	0.000275497	0.000336236
0.47859	-0.0434175	0.00700606	-6.82049e-05	0.000220529	0.000276119	0.000337402
0.47884	-0.0446103	0.00702945	-6.629e-05	0.000221867	0.000276737	0.000338566
0.47909	-0.0458053	0.00705271	-6.43677e-05	0.000223201	0.00027735	0.000339726
0.47933	-0.0470023	0.00707583	-6.24381e-05	0.000224532	0.000277959	0.000340884
0.47958	-0.0482014	0.00709881	-6.05012e-05	0.00022586	0.000278563	0.000342038
0.47983	-0.0494026	0.00712165	-5.85569e-05	0.000227185	0.000279163	0.000343189
0.48007	-0.0506057	0.00714435	-5.66052e-05	0.000228507	0.000279758	0.000344338
0.48032	-0.0518109	0.0071669	-5.46463e-05	0.000229825	0.000280348	0.000345482
0.48056	-0.0530179	0.00718931	-5.268e-05	0.000231141	0.000280934	0.000346624
0.48081	-0.0542269	0.00721157	-5.07065e-05	0.000232452	0.000281514	0.000347762
0.48105	-0.0554377	0.00723368	-4.87257e-05	0.00023376	0.00028209	0.000348897
0.4813	-0.0566504	0.00725564	-4.67375e-05	0.000235065	0.000282661	0.000350028
0.48154	-0.0578649	0.00727744	-4.47421e-05	0.000236365	0.000283227	0.000351156
0.48179	-0.0590811	0.00729909	-4.27395e-05	0.000237662	0.000283787	0.00035228
0.48203	-0.0602992	0.00732057	-4.07295e-05	0.000238955	0.000284343	0.0003534
0.48228	-0.0615189	0.0073419	-3.87124e-05	0.000240245	0.000284893	0.000354517
0.48252	-0.0627404	0.00736306	-3.66879e-05	0.00024153	0.000285439	0.00035563
0.48277	-0.0639636	0.00738406	-3.46562e-05	0.000242811	0.000285979	0.000356739
0.48301	-0.0651885	0.00740489	-3.26172e-05	0.000244088	0.000286513	0.000357845
0.48326	-0.066415	0.00742556	-3.0571e-05	0.000245361	0.000287043	0.000358946
0.4835	-0.0676431	0.00744606	-2.85174e-05	0.000246629	0.000287567	0.000360044
0.48375	-0.0688729	0.00746638	-2.64567e-05	0.000247894	0.000288086	0.000361137
0.48399	-0.0701042	0.00748654	-2.43887e-05	0.000249154	0.000288599	0.000362226
0.48423	-0.0713371	0.00750652	-2.23134e-05	0.000250409	0.000289106	0.000363312
0.48448	-0.0725715	0.00752632	-2.02308e-05	0.00025166	0.000289608	0.000364393
0.48472	-0.0738075	0.00754595	-1.8141e-05	0.000252907	0.000290105	0.00036547
0.48497	-0.075045	0.0075654	-1.60438e-05	0.000254149	0.000290596	0.000366543
0.48521	-0.0762841	0.00758467	-1.39394e-05	0.000255386	0.000291081	0.000367612
0.48545	-0.0775247	0.00760376	-1.18276e-05	0.000256619	0.00029156	0.000368676
0.4857	-0.0787669	0.00762267	-9.70841e-06	0.000257847	0.000292034	0.000369736
0.48594	-0.0800106	0.0076414	-7.58189e-06	0.000259071	0.000292502	0.000370792
0.48618	-0.0812557	0.00765995	-5.44799e-06	0.000260289	0.000292964	0.000371844
0.48643	-0.0825024	0.00767831	-3.30672e-06	0.000261503	0.000293421	0.000372891
0.48667	-0.0837505	0.00769648	-1.15808e-06	0.000262712	0.000293871	0.000373933
0.48691	-0.0850001	0.00771446	9.97922e-07	0.000263916	0.000294316	0.000374971
0.48716	-0.0862511	0.00773225	3.1613e-06	0.000265115	0.000294754	0.000376005
0.4874	-0.0875035	0.00774985	5.33204e-06	0.000266309	0.000295186	0.000377034
0.48764	-0.0887573	0.00776725	7.51014e-06	0.000267498	0.000295613	0.000378058
0.48788	-0.0900124	0.00778446	9.6956e-06	0.000268681	0.000296033	0.000379077
0.48813	-0.0912688	0.00780146	1.18884e-05	0.000269859	0.000296446	0.000380092
0.48837	-0.0925265	0.00781827	1.40886e-05	0.000271032	0.000296854	0.000381102
0.48861	-0.0937855	0.00783487	1.62961e-05	0.0002722	0.000297255	0.000382107
0.48885	-0.0950457	0.00785127	1.8511e-05	0.000273361	0.00029765	0.000383106
0.4891	-0.0963071	0.00786746	2.07332e-05	0.000274517	0.000298038	0.000384101
0.48934	-0.0975697	0.00788344	2.29627e-05	0.000275668	0.00029842	0.000385091
0.48958	-0.0988334	0.00789921	2.51996e-05	0.000276812	0.000298795	0.000386076
0.48982	-0.100098	0.00791476	2.74437e-05	0.000277951	0.000299164	0.000387055
0.49006	-0.101364	0.0079301	2.96952e-05	0.000279084	0.000299526	0.000388029
0.4903	-0.102631	0.00794522	3.19539e-05	0.000280211	0.000299881	0.000388998
0.49055	-0.103899	0.00796012	3.422e-05	0.000281331	0.00030023	0.000389961
0.49079	-0.105168	0.00797479	3.64934e-05	0.000282446	0.000300571	0.000390919
0.49103	-0.106438	0.00798925	3.87741e-05	0.000283554	0.000300906	0.000391872
0.49127	-0.107709	0.00800348	4.10622e-05	0.000284656	0.000301234	0.000392819
0.49151	-0.108981	0.00801749	4.33577e-05	0.000285752	0.000301554	0.00039376
0.49175	-0.110254	0.00803127	4.56605e-05	0.000286842	0.000301868	0.000394696
0.49199	-0.111529	0.00804482	4.79708e-05	0.000287925	0.000302175	0.000395626
0.49223	-0.112804	0.00805815	5.02885e-05	0.000289001	0.000302475	0.00039655
0.49247	-0.11408	0.00807124	5.26135e-05	0.000290071	0.000302767	0.000397469
0.49271	-0.115357	0.00808409	5.49459e-05	0.000291135	0.000303052	0.000398382
0.49295	-0.116634	0.00809671	5.72858e-05	0.000292192	0.00030333	0.000399289
0.49319	-0.117913	0.00810909	5.9633e-05	0.000293242	0.000303601	0.00040019
0.49343	-0.119193	0.00812123	6.19877e-05	0.000294285	0.000303864	0.000401085
0.49367	-0.120473	0.00813313	6.43498e-05	0.000295322	0.00030412	0.000401974
0.49391	-0.121755	0.00814478	6.67193e-05	0.000296352	0.000304368	0.000402857
0.49415	-0.123037	0.00815619	6.90963e-05	0.000297374	0.000304609	0.000403734
0.49439	-0.12432	0.00816736	7.14807e-05	0.00029839	0.000304842	0.000404605
0.49463	-0.125604	0.00817827	7.38726e-05	0.000299398	0.000305067	0.000405469
0.49487	-0.126888	0.00818894	7.62719e-05	0.0003004	0.000305285	0.000406327
0.49511	-0.128174	0.00819935	7.86787e-05	0.000301394	0.000305495	0.000407179
0.49535	-0.12946	0.00820951	8.1093e-05	0.000302381	0.000305697	0.000408024
0.49559	-0.130747	0.00821941	8.35147e-05	0.00030336	0.000305892	0.000408863
0.49584	-0.132034	0.00822905	8.59439e-05	0.000304332	0.000306078	0.000409695
0.49609	-0.133322	0.00823844	8.83805e-05	0.000305297	0.000306256	0.000410521
0.49633	-0.134611	0.00824756	9.08247e-05	0.000306254	0.000306427	0.00041134
0.49658	-0.135901	0.00825642	9.32763e-05	0.000307203	0.000306589	0.000412153
0.49683	-0.137191	0.00826502	9.57355e-05	0.000308145	0.000306744	0.000412959
0.49708	-0.138482	0.00827335	9.82022e-05	0.000309079	0.00030689	0.000413758
0.49733	-0.139774	0.00828142	0.000100676	0.000310005	0.000307028	0.00041455
0.49758	-0.141066	0.00828922	0.000103158	0.000310924	0.000307158	0.000415336
0.49783	-0.142359	0.00829675	0.000105648	0.000311835	0.00030728	0.000416115
0.49808	-0.143652	0.008304	0.000108145	0.000312738	0.000307393	0.000416887
0.49833	-0.144946	0.00831099	0.000110649	0.000313633	0.000307498	0.000417652
0.49857	-0.146241	0.0083177	0.000113161	0.00031452	0.000307595	0.00041841
0.49882	-0.147536	0.00832413	0.000115681	0.000315399	0.000307683	0.000419161
0.49907	-0.148831	0.00833028	0.000118208	0.000316269	0.000307762	0.000419904
0.49932	-0.150127	0.00833615	0.000120743	0.000317132	0.000307833	0.000420641
0.49957	-0.151424	0.00834174	0.000123286	0.000317986	0.000307896	0.00042137
0.49981	-0.152721	0.00834704	0.000125836	0.000318831	0.00030795	0.000422092
0.50006	-0.154018	0.00835206	0.000128393	0.000319669	0.000307994	0.000422807
0.50031	-0.155316	0.00835678	0.000130958	0.000320497	0.000308031	0.000423514
0.50056	-0.156614	0.00836122	0.000133531	0.000321317	0.000308058	0.000424214
0.5008	-0.157912	0.00836536	0.000136112	0.000322128	0.000308076	0.000424906
0.50105	-0.159211	0.0083692	0.000138699	0.000322931	0.000308086	0.000425591
0.5013	-0.16051	0.00837275	0.000141295	0.000323724	0.000308086	0.000426268
0.50155	-0.161809	0.008376	0.000143898	0.000324509	0.000308077	0.000426937
0.50179	-0.163109	0.00837894	0.000146508	0.000325285	0.000308059	0.000427599
0.50204	-0.164408	0.00838158	0.000149126	0.000326051	0.000308032	0.000428252
0.50229	-0.165708	0.00838392	0.000151752	0.000326808	0.000307996	0.000428898
0.50253	-0.167008	0.00838594	0.000154385	0.000327556	0.000307951	0.000429536
0.50278	-0.168308	0.00838766	0.000157026	0.000328295	0.000307896	0.000430166
0.50303	-0.169608	0.00838907	0.000159674	0.000329025	0.000307831	0.000430788
0.50327	-0.170909	0.00839017	0.00016233	0.000329745	0.000307758	0.000431402
0.50352	-0.172209	0.00839096	0.000164994	0.000330456	0.000307675	0.000432008
0.50377	-0.17351	0.00839144	0.000167666	0.000331157	0.000307582	0.000432606
0.50401	-0.174811	0.00839159	0.000170345	0.000331849	0.00030748	0.000433196
0.50426	-0.176112	0.00839144	0.000173032	0.000332532	0.000307368	0.000433778
0.50451	-0.177413	0.00839096	0.000175726	0.000333205	0.000307247	0.000434351
0.50475	-0.178714	0.00839016	0.000178428	0.000333868	0.000307116	0.000434916
0.505	-0.180015	0.00838905	0.000181139	0.000334521	0.000306975	0.000435473
0.50524	-0.181317	0.00838761	0.000183856	0.000335165	0.000306825	0.000436021
0.50549	-0.182618	0.00838585	0.000186582	0.0003358	0.000306664	0.000436561
0.50574	-0.18392	0.00838376	0.000189316	0.000336424	0.000306494	0.000437092
0.50598	-0.185222	0.00838135	0.000192057	0.000337039	0.000306314	0.000437615
0.50623	-0.186524	0.00837861	0.000194807	0.000337643	0.000306124	0.00043813
0.50647	-0.187826	0.00837554	0.000197564	0.000338238	0.000305924	0.000438636
0.50672	-0.189129	0.00837214	0.000200329	0.000338823	0.000305714	0.000439133
0.50696	-0.190431	0.00836841	0.000203102	0.000339398	0.000305494	0.000439621
0.50721	-0.191733	0.00836434	0.000205883	0.000339963	0.000305264	0.000440101
0.50745	-0.193036	0.00835994	0.000208672	0.000340518	0.000305023	0.000440573
0.5077	-0.194338	0.0083552	0.000211469	0.000341063	0.000304773	0.000441035
0.50794	-0.195641	0.00835013	0.000214274	0.000341597	0.000304512	0.000441488
0.50819	-0.196944	0.00834472	0.000217088	0.000342121	0.000304241	0.000441933
0.50843	-0.198247	0.00833897	0.000219909	0.000342636	0.00030396	0.000442369
0.50868	-0.19955	0.00833287	0.000222738	0.000343139	0.000303668	0.000442796
0.50892	-0.200853	0.00832644	0.000225576	0.000343633	0.000303366	0.000443214
0.50916	-0.202156	0.00831967	0.000228421	0.000344116	0.000303053	0.000443623
0.50941	-0.203459	0.00831255	0.000231275	0.000344589	0.00030273	0.000444023
0.50965	-0.204763	0.00830509	0.000234137	0.000345052	0.000302397	0.000444414
0.5099	-0.206066	0.00829728	0.000237007	0.000345504	0.000302053	0.000444796
0.51014	-0.20737	0.00828912	0.000239886	0.000345946	0.000301698	0.000445169
0.51038	-0.208674	0.00828061	0.000242773	0.000346377	0.000301333	0.000445532
0.51063	-0.209978	0.00827176	0.000245668	0.000346797	0.000300957	0.000445886
0.51087	-0.211282	0.00826254	0.000248571	0.000347207	0.00030057	0.000446231
0.51111	-0.212586	0.00825298	0.000251483	0.000347606	0.000300173	0.000446567
0.51135	-0.21389	0.00824305	0.000254403	0.000347994	0.000299765	0.000446893
0.51159	-0.215194	0.00823277	0.000257331	0.000348372	0.000299345	0.00044721
0.51183	-0.216498	0.00822212	0.000260268	0.000348738	0.000298915	0.000447517
0.51208	-0.217802	0.00821111	0.000263213	0.000349094	0.000298474	0.000447814
0.51232	-0.219105	0.00819974	0.000266166	0.000349438	0.000298021	0.000448102
0.51256	-0.220409	0.00818799	0.000269128	0.000349771	0.000297557	0.00044838
0.5128	-0.221713	0.00817587	0.000272097	0.000350093	0.000297083	0.000448649
0.51305	-0.223016	0.00816338	0.000275076	0.000350403	0.000296596	0.000448907
0.51329	-0.224319	0.00815052	0.000278062	0.000350702	0.000296099	0.000449155
0.51353	-0.225622	0.00813727	0.000281057	0.000350989	0.00029559	0.000449394
0.51378	-0.226925	0.00812364	0.00028406	0.000351264	0.000295069	0.000449622
0.51402	-0.228227	0.00810963	0.000287071	0.000351528	0.000294537	0.00044984
0.51426	-0.229529	0.00809523	0.00029009	0.00035178	0.000293993	0.000450048
0.5145	-0.230831	0.00808044	0.000293118	0.000352019	0.000293437	0.000450245
0.51475	-0.232132	0.00806527	0.000296154	0.000352247	0.00029287	0.000450433
0.51499	-0.233433	0.0080497	0.000299199	0.000352463	0.000292291	0.000450609
0.51523	-0.234734	0.00803374	0.000302251	0.000352666	0.000291699	0.000450776
0.51547	-0.236034	0.00801738	0.000305312	0.000352858	0.000291096	0.000450931
0.51571	-0.237334	0.00800062	0.000308382	0.000353037	0.000290481	0.000451076
0.51596	-0.238633	0.00798346	0.000311459	0.000353203	0.000289854	0.000451211
0.5162	-0.239931	0.0079659	0.000314545	0.000353357	0.000289215	0.000451334
0.51644	-0.241229	0.00794792	0.00031764	0.000353499	0.000288563	0.000451447
0.51668	-0.242527	0.00792954	0.000320742	0.000353627	0.000287899	0.000451549
0.51692	-0.243823	0.00791074	0.000323853	0.000353743	0.000287222	0.000451639
0.51716	-0.245119	0.00789152	0.000326972	0.000353845	0.000286533	0.000451719
0.5174	-0.246415	0.00787189	0.000330099	0.000353935	0.000285831	0.000451787
0.51765	-0.247709	0.00785183	0.000333235	0.000354011	0.000285117	0.000451844
0.51789	-0.249003	0.00783135	0.000336379	0.000354074	0.00028439	0.00045189
0.51813	-0.250296	0.00781044	0.000339531	0.000354124	0.00028365	0.000451924
0.51837	-0.251588	0.00778911	0.000342691	0.00035416	0.000282897	0.000451947
0.51861	-0.252879	0.00776733	0.000345859	0.000354183	0.000282131	0.000451958
0.51885	-0.254169	0.00774513	0.000349036	0.000354191	0.000281353	0.000451957
0.51909	-0.255458	0.00772248	0.000352221	0.000354186	0.000280561	0.000451945
0.51933	-0.256746	0.00769939	0.000355414	0.000354167	0.000279756	0.000451921
0.51957	-0.258033	0.00767586	0.000358615	0.000354134	0.000278937	0.000451884
0.51981	-0.259319	0.00765188	0.000361824	0.000354087	0.000278105	0.000451836
0.52005	-0.260604	0.00762745	0.000365042	0.000354026	0.00027726	0.000451776
0.52029	-0.261888	0.00760257	0.000368268	0.00035395	0.000276402	0.000451704
0.52053	-0.26317	0.00757723	0.000371502	0.00035386	0.000275529	0.000451619
0.52077	-0.264451	0.00755144	0.000374744	0.000353755	0.000274644	0.000451523
0.52101	-0.265731	0.00752519	0.000377994	0.000353636	0.000273744	0.000451413
0.52125	-0.26701	0.00749848	0.000381252	0.000353502	0.000272831	0.000451292
0.52149	-0.268287	0.00747131	0.000384519	0.000353354	0.000271904	0.000451158
0.52173	-0.269563	0.00744366	0.000387794	0.00035319	0.000270963	0.000451011
0.52197	-0.270837	0.00741554	0.000391076	0.000353011	0.000270008	0.000450852
0.52221	-0.27211	0.00738695	0.000394367	0.000352817	0.000269039	0.00045068
0.52245	-0.273381	0.00735788	0.000397666	0.000352608	0.000268055	0.000450494
0.52269	-0.274651	0.00732832	0.000400973	0.000352383	0.000267058	0.000450296
0.52293	-0.275919	0.00729827	0.000404288	0.000352143	0.000266046	0.000450085
0.52317	-0.277185	0.00726774	0.00040761	0.000351886	0.000265019	0.00044986
0.5234	-0.278449	0.00723671	0.000410941	0.000351614	0.000263978	0.000449622
0.52364	-0.279711	0.00720518	0.00041428	0.000351325	0.000262922	0.000449371
0.52388	-0.280972	0.00717315	0.000417626	0.00035102	0.000261851	0.000449106
0.52412	-0.28223	0.00714062	0.00042098	0.000350699	0.000260765	0.000448828
0.52436	-0.283486	0.00710757	0.000424342	0.000350362	0.000259665	0.000448536
0.5246	-0.28474	0.00707401	0.000427712	0.000350007	0.000258549	0.00044823
0.52483	-0.285992	0.00703994	0.00043109	0.000349636	0.000257418	0.000447909
[truncated: 21,263 more rows]

## Sheet: Sheet2
0.043941	-0.0161921	-6.366e-05	0.000104368	-0.000101596	1.57172e-06	-5.78659e-06
0.1217	-0.0164078	-6.34153e-05	0.000104869	-0.000104393	1.60852e-06	-5.92272e-06
0.24836	-0.0166256	-6.31556e-05	0.000105365	-0.000107234	1.64586e-06	-6.06088e-06
0.45467	-0.0168457	-6.28787e-05	0.000105856	-0.000110121	1.68379e-06	-6.20118e-06
0.79074	-0.0170681	-6.25836e-05	0.00010634	-0.000113057	1.7223e-06	-6.34368e-06
1.3382	-0.0172927	-6.22684e-05	0.000106816	-0.000116044	1.76144e-06	-6.4885e-06
2.2298	-0.0175197	-6.19337e-05	0.000107284	-0.000119081	1.8012e-06	-6.6356e-06
3.6823	-0.0177489	-6.15819e-05	0.000107747	-0.000122165	1.84154e-06	-6.78488e-06
5.5599	-0.0179805	-6.12116e-05	0.000108204	-0.000125299	1.88249e-06	-6.93643e-06
7.4438	-0.0182144	-6.08222e-05	0.000108653	-0.000128484	1.92407e-06	-7.09027e-06
9.3282	-0.0184494	-6.04187e-05	0.000109092	-0.000131715	1.967e-06	-7.24653e-06
11.194	-0.0186838	-6.00071e-05	0.000109514	-0.00013499	2.01234e-06	-7.40541e-06
13.079	-0.0189163	-5.9592e-05	0.000109917	-0.000138303	2.06074e-06	-7.56698e-06
14.914	-0.0191455	-5.91803e-05	0.000110297	-0.00014165	2.11312e-06	-7.73138e-06
16.743	-0.0193706	-5.87737e-05	0.000110651	-0.000145031	2.16995e-06	-7.89872e-06
18.573	-0.0195914	-5.8372e-05	0.000110977	-0.000148445	2.23139e-06	-8.0691e-06
20.403	-0.0198061	-5.79815e-05	0.000111269	-0.00015189	2.29847e-06	-8.24272e-06
22.233	-0.0200131	-5.76079e-05	0.000111523	-0.00015536	2.37219e-06	-8.41974e-06
24.062	-0.0202122	-5.72519e-05	0.000111739	-0.000158856	2.4526e-06	-8.60019e-06
25.892	-0.0204035	-5.69149e-05	0.000111917	-0.000162376	2.5397e-06	-8.78401e-06
27.721	-0.0205865	-5.65984e-05	0.000112055	-0.00016592	2.63379e-06	-8.97127e-06
29.55	-0.0207613	-5.63025e-05	0.000112155	-0.000169487	2.73483e-06	-9.16195e-06
31.383	-0.0209261	-5.60337e-05	0.00011221	-0.000173072	2.84384e-06	-9.35624e-06
33.252	-0.0210785	-5.58009e-05	0.000112214	-0.00017667	2.9623e-06	-9.55439e-06
35.124	-0.0212178	-5.56071e-05	0.000112164	-0.000180278	3.09058e-06	-9.75644e-06
37.013	-0.0213428	-5.54568e-05	0.000112058	-0.000183892	3.22932e-06	-9.96249e-06
38.923	-0.0214537	-5.53492e-05	0.000111895	-0.000187515	3.3786e-06	-1.01726e-05
40.84	-0.0215514	-5.52791e-05	0.000111677	-0.00019115	3.53781e-06	-1.03868e-05
42.762	-0.0216354	-5.52479e-05	0.000111402	-0.000194798	3.70732e-06	-1.06051e-05
44.689	-0.0217055	-5.5255e-05	0.000111068	-0.00019846	3.88725e-06	-1.08277e-05
46.624	-0.0217615	-5.5301e-05	0.000110675	-0.000202135	4.07772e-06	-1.10545e-05
48.511	-0.0218027	-5.53896e-05	0.00011022	-0.00020582	4.27922e-06	-1.12857e-05
50.442	-0.0218294	-5.55182e-05	0.000109705	-0.000209519	4.49153e-06	-1.15213e-05
52.375	-0.0218421	-5.56842e-05	0.00010913	-0.000213234	4.71442e-06	-1.17612e-05
54.293	-0.0218388	-5.58955e-05	0.000108488	-0.000216959	4.94906e-06	-1.20058e-05
56.198	-0.0218169	-5.61617e-05	0.000107773	-0.000220688	5.19699e-06	-1.22551e-05
58.02	-0.0217751	-5.64882e-05	0.000106981	-0.000224415	5.459e-06	-1.25095e-05
59.925	-0.021711	-5.68838e-05	0.000106104	-0.000228136	5.73643e-06	-1.27689e-05
61.779	-0.0216245	-5.73484e-05	0.000105142	-0.000231849	6.02942e-06	-1.30336e-05
63.697	-0.0215165	-5.78773e-05	0.000104096	-0.000235561	6.33746e-06	-1.33036e-05
65.625	-0.0213853	-5.84772e-05	0.000102962	-0.000239266	6.6616e-06	-1.35789e-05
67.553	-0.0212295	-5.91527e-05	0.000101735	-0.00024296	7.00265e-06	-1.38598e-05
69.451	-0.0210498	-5.99013e-05	0.000100416	-0.000246647	7.36022e-06	-1.41462e-05
71.35	-0.0208467	-6.07221e-05	9.9009e-05	-0.000250327	7.73399e-06	-1.44381e-05
73.27	-0.0206209	-6.16125e-05	9.75148e-05	-0.000254001	8.12359e-06	-1.47353e-05
75.196	-0.0203737	-6.25673e-05	9.59379e-05	-0.000257674	8.52821e-06	-1.50378e-05
77.122	-0.0201044	-6.35904e-05	9.42756e-05	-0.000261344	8.94843e-06	-1.53457e-05
79.057	-0.019811	-6.46881e-05	9.25227e-05	-0.000265005	9.38523e-06	-1.56591e-05
80.991	-0.0194945	-6.58581e-05	9.06818e-05	-0.00026866	9.83821e-06	-1.59779e-05
82.91	-0.019155	-6.71001e-05	8.8754e-05	-0.000272308	1.03072e-05	-1.63022e-05
84.832	-0.018792	-6.84156e-05	8.6737e-05	-0.000275949	1.07926e-05	-1.6632e-05
86.758	-0.0184053	-6.9804e-05	8.46298e-05	-0.000279585	1.12945e-05	-1.69673e-05
88.648	-0.0179943	-7.12677e-05	8.24302e-05	-0.000283214	1.18132e-05	-1.73084e-05
90.564	-0.017558	-7.28096e-05	8.01345e-05	-0.000286833	1.23495e-05	-1.76553e-05
92.469	-0.0170971	-7.44274e-05	7.77452e-05	-0.000290447	1.29029e-05	-1.80079e-05
94.351	-0.0166127	-7.61176e-05	7.52663e-05	-0.000294055	1.34727e-05	-1.83662e-05
96.237	-0.0161048	-7.78804e-05	7.26969e-05	-0.00029766	1.4059e-05	-1.87302e-05
98.147	-0.0155737	-7.97141e-05	7.0038e-05	-0.000301263	1.46616e-05	-1.90999e-05
100.05	-0.0150173	-8.16261e-05	6.72836e-05	-0.000304857	1.52817e-05	-1.94754e-05
101.95	-0.0144326	-8.36282e-05	6.44235e-05	-0.000308436	1.59213e-05	-1.98572e-05
103.83	-0.0138181	-8.5725e-05	6.14541e-05	-0.000311996	1.65811e-05	-2.02453e-05
105.71	-0.0131719	-8.79243e-05	5.83694e-05	-0.000315531	1.72622e-05	-2.06399e-05
107.62	-0.0124929	-9.02298e-05	5.51656e-05	-0.000319039	1.79654e-05	-2.10413e-05
109.54	-0.011781	-9.26412e-05	5.18421e-05	-0.000322521	1.86907e-05	-2.14493e-05
111.5	-0.0110336	-9.51679e-05	4.83913e-05	-0.000325969	1.94396e-05	-2.18644e-05
113.43	-0.0102483	-9.78186e-05	4.48052e-05	-0.000329379	2.02136e-05	-2.22868e-05
115.37	-0.0094259	-0.00010059	4.10865e-05	-0.000332752	2.10122e-05	-2.27163e-05
117.3	-0.00856767	-0.000103479	3.72394e-05	-0.000336092	2.18347e-05	-2.3153e-05
119.24	-0.00767364	-0.000106485	3.32637e-05	-0.000339398	2.26811e-05	-2.35967e-05
121.18	-0.00674505	-0.000109603	2.91634e-05	-0.000342675	2.35507e-05	-2.40474e-05
123.12	-0.00577992	-0.000112842	2.49323e-05	-0.000345917	2.44446e-05	-2.45053e-05
125.06	-0.0047748	-0.000116212	2.05598e-05	-0.000349116	2.53649e-05	-2.49707e-05
127	-0.00372995	-0.000119713	1.60468e-05	-0.000352272	2.63114e-05	-2.54436e-05
128.94	-0.00264485	-0.000123349	1.13917e-05	-0.000355383	2.72845e-05	-2.59242e-05
130.88	-0.00151983	-0.000127115	6.59481e-06	-0.000358453	2.82841e-05	-2.64124e-05
132.82	-0.000356896	-0.000131004	1.66126e-06	-0.000361489	2.93089e-05	-2.69081e-05
134.76	0.000844209	-0.000135017	-3.41029e-06	-0.00036449	3.03591e-05	-2.74113e-05
136.71	0.0020834	-0.000139151	-8.62053e-06	-0.000367459	3.14348e-05	-2.79223e-05
138.65	0.00335973	-0.000143402	-1.39668e-05	-0.000370399	3.25354e-05	-2.84408e-05
140.59	0.00467279	-0.00014777	-1.9448e-05	-0.000373312	3.36606e-05	-2.8967e-05
142.54	0.00602126	-0.000152249	-2.50609e-05	-0.000376202	3.48098e-05	-2.95006e-05
144.47	0.00740347	-0.00015683	-3.08012e-05	-0.000379075	3.5982e-05	-3.00417e-05
146.4	0.00882096	-0.000161521	-3.66738e-05	-0.000381929	3.71781e-05	-3.05904e-05
148.34	0.0102762	-0.000166329	-4.2686e-05	-0.000384756	3.83996e-05	-3.1147e-05
150.28	0.0117696	-0.000171257	-4.88395e-05	-0.000387555	3.96468e-05	-3.17115e-05
152.21	0.0133027	-0.00017631	-5.51389e-05	-0.000390324	4.09204e-05	-3.22841e-05
154.17	0.0148745	-0.000181483	-6.15822e-05	-0.000393065	4.22202e-05	-3.28648e-05
156.13	0.0164827	-0.000186767	-6.81632e-05	-0.000395788	4.35446e-05	-3.34534e-05
158.07	0.0181282	-0.000192163	-7.48851e-05	-0.000398491	4.48943e-05	-3.40501e-05
159.99	0.0198114	-0.000197674	-8.17495e-05	-0.000401174	4.62694e-05	-3.4655e-05
161.93	0.0215322	-0.000203298	-8.87565e-05	-0.000403837	4.76701e-05	-3.5268e-05
163.92	0.0232918	-0.000209041	-9.59088e-05	-0.000406476	4.90969e-05	-3.58893e-05
165.89	0.0250898	-0.000214902	-0.000103206	-0.000409093	5.05498e-05	-3.65188e-05
167.81	0.026926	-0.000220879	-0.000110647	-0.000411689	5.20284e-05	-3.71566e-05
169.73	0.0288012	-0.000226976	-0.000118234	-0.000414263	5.35335e-05	-3.78028e-05
171.63	0.0307165	-0.000233196	-0.000125972	-0.000416811	5.50656e-05	-3.84574e-05
173.53	0.0326724	-0.000239541	-0.000133861	-0.000419333	5.66249e-05	-3.91206e-05
175.46	0.0346699	-0.000246016	-0.000141904	-0.000421825	5.82122e-05	-3.97925e-05
177.41	0.0367079	-0.000252615	-0.000150099	-0.000424292	5.98269e-05	-4.04729e-05
179.31	0.0387847	-0.000259331	-0.000158442	-0.000426741	6.14679e-05	-4.11619e-05
181.22	0.0408999	-0.00026616	-0.000166933	-0.000429175	6.31351e-05	-4.18595e-05
183.12	0.0430527	-0.0002731	-0.000175568	-0.000431597	6.4828e-05	-4.25657e-05
185.05	0.045243	-0.00028015	-0.00018435	-0.000434007	6.65466e-05	-4.32804e-05
186.98	0.0474722	-0.000287315	-0.000193281	-0.000436402	6.82917e-05	-4.40038e-05
188.9	0.0497391	-0.00029459	-0.000202359	-0.000438787	7.00627e-05	-4.4736e-05
190.83	0.0520431	-0.000301973	-0.000211581	-0.000441163	7.18592e-05	-4.54767e-05
192.73	0.0543866	-0.000309473	-0.000220957	-0.000443524	7.36827e-05	-4.62264e-05
194.59	0.0567726	-0.000317099	-0.000230493	-0.000445864	7.55349e-05	-4.69852e-05
196.44	0.0592031	-0.000324862	-0.000240196	-0.000448175	7.7417e-05	-4.77534e-05
198.28	0.0616812	-0.000332772	-0.000250076	-0.000450449	7.93308e-05	-4.85313e-05
200.12	0.0642075	-0.000340831	-0.000260134	-0.000452685	8.12768e-05	-4.9319e-05
201.94	0.0667812	-0.000349035	-0.000270369	-0.000454888	8.32544e-05	-5.01164e-05
203.75	0.0694051	-0.000357395	-0.000280789	-0.000457048	8.52654e-05	-5.09239e-05
205.56	0.0720816	-0.00036592	-0.000291402	-0.000459161	8.73111e-05	-5.17416e-05
207.36	0.0748106	-0.000374608	-0.000302207	-0.000461228	8.93915e-05	-5.25697e-05
209.15	0.0775926	-0.000383463	-0.000313205	-0.000463246	9.1507e-05	-5.34081e-05
210.93	0.0804277	-0.000392484	-0.000324398	-0.000465216	9.36576e-05	-5.42569e-05
212.7	0.0833154	-0.000401669	-0.000335784	-0.000467141	9.5843e-05	-5.51162e-05
214.46	0.0862584	-0.000411028	-0.000347371	-0.000469012	9.80649e-05	-5.59861e-05
216.22	0.0892605	-0.000420576	-0.000359171	-0.000470821	0.000100326	-5.68671e-05
217.97	0.0923227	-0.000430316	-0.000371186	-0.000472563	0.000102625	-5.77592e-05
219.7	0.0954464	-0.000440254	-0.000383422	-0.000474236	0.000104965	-5.86626e-05
221.43	0.098631	-0.000450386	-0.000395875	-0.000475843	0.000107345	-5.95773e-05
223.13	0.101873	-0.0004607	-0.000408539	-0.000477394	0.000109763	-6.05032e-05
224.81	0.105173	-0.000471195	-0.000421414	-0.00047889	0.000112219	-6.14402e-05
226.48	0.108531	-0.000481867	-0.000434498	-0.000480335	0.000114712	-6.23883e-05
228.15	0.111945	-0.000492714	-0.000447792	-0.000481731	0.000117243	-6.33477e-05
229.82	0.115417	-0.000503742	-0.000461298	-0.000483074	0.000119813	-6.43184e-05
231.46	0.118944	-0.000514941	-0.000475011	-0.000484373	0.000122419	-6.53002e-05
233.09	0.122526	-0.000526304	-0.000488928	-0.000485633	0.000125062	-6.62932e-05
234.72	0.126165	-0.000537841	-0.000503056	-0.000486846	0.000127742	-6.72976e-05
236.33	0.129865	-0.000549568	-0.000517406	-0.000488003	0.000130462	-6.83138e-05
237.94	0.133627	-0.000561489	-0.000531984	-0.000489099	0.000133223	-6.93418e-05
239.54	0.137455	-0.000573619	-0.000546799	-0.000490124	0.000136027	-7.03821e-05
241.14	0.141347	-0.000585952	-0.000561848	-0.000491083	0.000138874	-7.14346e-05
242.73	0.145302	-0.000598476	-0.000577125	-0.000491986	0.000141761	-7.24991e-05
244.31	0.14932	-0.000611199	-0.000592636	-0.000492828	0.00014469	-7.35759e-05
245.88	0.153403	-0.000624126	-0.000608384	-0.000493605	0.000147662	-7.46651e-05
247.45	0.157542	-0.00063716	-0.00062438	-0.000494301	0.000150673	-7.57646e-05
249.01	0.161722	-0.000650171	-0.00064064	-0.000494889	0.000153718	-7.68714e-05
250.57	0.165934	-0.000663073	-0.000657172	-0.000495356	0.000156794	-7.79837e-05
252.12	0.170164	-0.00067574	-0.000673986	-0.000495684	0.000159895	-7.90988e-05
253.66	0.174408	-0.000688123	-0.000691092	-0.000495857	0.000163021	-8.02154e-05
255.19	0.178667	-0.00070021	-0.000708501	-0.000495867	0.000166171	-8.13335e-05
256.72	0.182925	-0.000711871	-0.000726225	-0.000495688	0.00016934	-8.245e-05
258.25	0.187172	-0.000722982	-0.000744283	-0.000495295	0.000172526	-8.35623e-05
259.76	0.191406	-0.000733535	-0.000762674	-0.000494688	0.000175726	-8.46702e-05
261.27	0.195624	-0.000743521	-0.000781395	-0.000493872	0.00017894	-8.57737e-05
262.78	0.199825	-0.000752905	-0.000800452	-0.00049284	0.000182167	-8.68719e-05
264.28	0.204008	-0.000761691	-0.000819845	-0.000491594	0.000185407	-8.79651e-05
265.77	0.208159	-0.000769747	-0.000839589	-0.00049011	0.000188656	-8.90503e-05
267.26	0.212259	-0.000776889	-0.000859704	-0.000488352	0.000191905	-9.01234e-05
268.74	0.216303	-0.000783063	-0.000880196	-0.000486313	0.000195154	-9.11832e-05
270.21	0.220281	-0.000788186	-0.000901072	-0.00048398	0.000198398	-9.2228e-05
271.68	0.224194	-0.000792257	-0.000922339	-0.000481348	0.000201638	-9.32577e-05
273.14	0.228053	-0.000795365	-0.000943995	-0.000478423	0.00020488	-9.42745e-05
274.6	0.231855	-0.000797472	-0.000966051	-0.000475195	0.000208121	-9.52774e-05
276.05	0.235601	-0.00079857	-0.000988513	-0.000471656	0.000211363	-9.62665e-05
277.5	0.239289	-0.000798647	-0.00101139	-0.000467802	0.000214606	-9.72414e-05
278.94	0.242913	-0.000797637	-0.00103468	-0.000463625	0.000217846	-9.82008e-05
280.39	0.246477	-0.000795576	-0.00105838	-0.000459125	0.000221087	-9.91454e-05
281.84	0.249986	-0.000792506	-0.00108251	-0.000454304	0.00022433	-0.000100076
283.28	0.253425	-0.00078827	-0.00110708	-0.000449136	0.000227569	-0.00010099
284.72	0.256773	-0.000782674	-0.0011321	-0.000443584	0.000230798	-0.000101883
286.15	0.260018	-0.000775615	-0.00115759	-0.00043763	0.000234011	-0.000102751
287.58	0.263141	-0.000766917	-0.00118357	-0.000431244	0.000237201	-0.000103592
289	0.266143	-0.000756572	-0.00121004	-0.00042442	0.00024037	-0.000104405
290.41	0.269034	-0.000744657	-0.001237	-0.000417165	0.000243521	-0.000105192
291.82	0.271799	-0.000731036	-0.00126448	-0.000409452	0.00024665	-0.00010595
293.23	0.274429	-0.00071561	-0.00129247	-0.000401261	0.000249752	-0.000106677
294.63	0.276928	-0.00069843	-0.00132098	-0.000392603	0.00025283	-0.000107374
296.02	0.2793	-0.000679532	-0.00135	-0.000383489	0.000255884	-0.000108042
297.41	0.281551	-0.000658962	-0.00137953	-0.000373928	0.000258918	-0.000108681
298.8	0.283692	-0.000636831	-0.00140956	-0.000363939	0.000261935	-0.000109296
300.18	0.285716	-0.00061306	-0.0014401	-0.000353509	0.000264932	-0.000109883
301.56	0.287608	-0.000587524	-0.00147116	-0.000342615	0.000267906	-0.00011044
302.93	0.289376	-0.000560274	-0.00150273	-0.00033127	0.000270857	-0.000110969
304.3	0.291019	-0.000531327	-0.00153482	-0.000319479	0.000273786	-0.00011147
305.67	0.292534	-0.00050064	-0.00156743	-0.000307231	0.000276692	-0.000111941
307.03	0.293923	-0.000468213	-0.00160057	-0.000294519	0.000279576	-0.000112384
308.39	0.295181	-0.000433996	-0.00163425	-0.000281333	0.000282437	-0.000112796
309.74	0.2963	-0.000397913	-0.00166848	-0.000267654	0.000285272	-0.000113177
311.09	0.297287	-0.000360021	-0.00170325	-0.000253494	0.000288083	-0.000113527
312.44	0.298149	-0.000320401	-0.00173856	-0.000238873	0.000290874	-0.000113848
313.78	0.298887	-0.000279043	-0.00177441	-0.000223787	0.000293644	-0.000114142
315.11	0.299504	-0.000235976	-0.00181079	-0.000208239	0.000296395	-0.000114407
316.44	0.299985	-0.000191052	-0.00184773	-0.000192201	0.000299122	-0.000114641
317.77	0.300304	-0.000144025	-0.00188526	-0.000175625	0.000301814	-0.000114838
319.1	0.300451	-9.4803e-05	-0.00192339	-0.000158495	0.00030447	-0.000114997
320.41	0.30041	-4.32298e-05	-0.00196212	-0.000140781	0.000307082	-0.000115113
321.73	0.300173	1.07765e-05	-0.00200149	-0.000122467	0.000309648	-0.000115186
323.14	0.29974	6.72186e-05	-0.00204148	-0.000103548	0.000312168	-0.000115214
324.57	0.299092	0.000126287	-0.00208213	-8.39883e-05	0.000314635	-0.000115194
325.99	0.298209	0.000188166	-0.00212345	-6.37502e-05	0.000317043	-0.000115122
327.41	0.297098	0.000252794	-0.00216544	-4.28466e-05	0.000319394	-0.000115
328.82	0.295769	0.000320081	-0.00220809	-2.12969e-05	0.000321692	-0.000114828
330.23	0.294222	0.000390024	-0.00225141	8.98624e-07	0.000323936	-0.000114608
331.63	0.292467	0.000462532	-0.00229537	2.37223e-05	0.000326131	-0.000114341
333.03	0.290489	0.000537753	-0.00234001	4.72026e-05	0.000328271	-0.000114025
334.42	0.288261	0.000615945	-0.00238535	7.139e-05	0.000330347	-0.000113654
335.81	0.285785	0.000697091	-0.00243139	9.62804e-05	0.000332358	-0.000113227
337.19	0.283057	0.00078123	-0.00247814	0.00012188	0.000334305	-0.000112744
338.57	0.280081	0.000868333	-0.00252559	0.00014819	0.000336188	-0.000112207
339.95	0.276875	0.000958244	-0.00257375	0.000175188	0.000338015	-0.000111618
341.32	0.273439	0.00105098	-0.00262262	0.000202882	0.000339786	-0.000110977
342.68	0.269775	0.00114652	-0.0026722	0.000231276	0.000341503	-0.000110284
344.05	0.265892	0.0012448	-0.00272248	0.000260358	0.000343168	-0.000109542
345.4	0.261792	0.00134579	-0.00277348	0.000290124	0.000344784	-0.000108751
346.76	0.257489	0.00144938	-0.00282519	0.00032056	0.000346356	-0.000107914
348.1	0.252998	0.00155545	-0.00287759	0.000351647	0.000347888	-0.000107032
349.45	0.248306	0.0016641	-0.0029307	0.000383409	0.000349378	-0.000106105
350.79	0.243394	0.00177553	-0.00298455	0.000415881	0.000350818	-0.000105127
352.12	0.23826	0.00188975	-0.00303914	0.000449069	0.000352207	-0.000104099
353.45	0.232892	0.0020069	-0.00309448	0.000482997	0.000353541	-0.000103017
354.78	0.227298	0.0021269	-0.00315058	0.000517656	0.000354824	-0.000101884
356.1	0.221501	0.00224955	-0.00320742	0.00055302	0.000356065	-0.000100703
357.42	0.215494	0.00237493	-0.00326502	0.000589103	0.000357261	-9.94736e-05
358.73	0.209275	0.00250305	-0.00332337	0.000625916	0.000358412	-9.81948e-05
360.04	0.202844	0.00263392	-0.0033825	0.000663459	0.000359519	-9.68669e-05
361.35	0.196193	0.00276763	-0.00344239	0.000701742	0.000360577	-9.54879e-05
362.65	0.189323	0.00290415	-0.00350305	0.000740764	0.000361588	-9.40583e-05
363.95	0.182237	0.00304347	-0.00356449	0.000780521	0.000362553	-9.25789e-05
365.26	0.17493	0.00318564	-0.00362671	0.000821025	0.00036347	-9.1048e-05
366.58	0.167393	0.00333075	-0.00368972	0.000862294	0.000364337	-8.94644e-05
367.9	0.159623	0.00347883	-0.00375353	0.000904334	0.000365151	-8.78269e-05
369.22	0.151611	0.00362996	-0.00381815	0.000947158	0.000365911	-8.61339e-05
370.53	0.143366	0.00378406	-0.00388358	0.000990756	0.000366619	-8.43873e-05
371.83	0.134908	0.00394099	-0.0039498	0.00103511	0.000367283	-8.25905e-05
373.13	0.126238	0.00410072	-0.00401683	0.00108022	0.000367905	-8.07442e-05
374.43	0.117367	0.00426317	-0.00408466	0.00112608	0.000368489	-7.88501e-05
375.73	0.108293	0.00442835	-0.0041533	0.0011727	0.000369035	-7.69082e-05
377.02	0.0990086	0.00459635	-0.00422275	0.00122008	0.000369539	-7.49164e-05
378.3	0.0895214	0.0047671	-0.00429301	0.00126821	0.000370005	-7.28765e-05
379.59	0.0798389	0.00494053	-0.00436409	0.0013171	0.000370436	-7.07901e-05
380.86	0.0699417	0.00511684	-0.004436	0.00136677	0.000370825	-6.86529e-05
382.14	0.0598062	0.00529624	-0.00450877	0.00141726	0.000371163	-6.646e-05
383.41	0.0494165	0.00547888	-0.00458242	0.00146861	0.000371444	-6.4208e-05
384.68	0.0387459	0.00566502	-0.00465696	0.00152085	0.00037166	-6.18916e-05
385.94	0.0277921	0.00585469	-0.00473242	0.001574	0.000371808	-5.95099e-05
387.2	0.0165629	0.00604782	-0.00480878	0.00162804	0.000371893	-5.70646e-05
388.45	0.00503554	0.00624462	-0.00488607	0.00168303	0.000371906	-5.45507e-05
389.69	-0.00680833	0.00644528	-0.00496432	0.00173898	0.00037184	-5.19645e-05
390.93	-0.018968	0.0066498	-0.00504353	0.00179591	0.000371696	-4.9306e-05
392.17	-0.0314458	0.00685819	-0.00512369	0.00185382	0.000371474	-4.65748e-05
393.41	-0.0442436	0.00707049	-0.00520482	0.0019127	0.000371172	-4.37704e-05
394.64	-0.0573557	0.00728664	-0.00528692	0.00197257	0.000370794	-4.0894e-05
395.87	-0.0708041	0.00750685	-0.00537	0.00203345	0.000370331	-3.79409e-05
397.1	-0.0846193	0.00773142	-0.00545411	0.0020954	0.000369771	-3.49047e-05
398.32	-0.0988075	0.0079604	-0.00553924	0.00215843	0.000369113	-3.17842e-05
399.54	-0.113382	0.00819392	-0.00562542	0.00222255	0.000368353	-2.85764e-05
400.76	-0.128335	0.00843191	-0.00571264	0.00228778	0.000367493	-2.52831e-05
401.99	-0.143639	0.00867413	-0.00580089	0.00235406	0.000366543	-2.19097e-05
403.22	-0.159293	0.00892061	-0.00589017	0.00242142	0.000365506	-1.84559e-05
404.41	-0.17529	0.00917126	-0.00598049	0.00248983	0.000364383	-1.49235e-05
405.59	-0.191627	0.00942606	-0.00607184	0.0025593	0.000363177	-1.1313e-05
406.78	-0.20831	0.00968509	-0.00616424	0.00262984	0.000361885	-7.62278e-06
407.95	-0.225324	0.00994821	-0.00625768	0.00270144	0.000360514	-3.8561e-06
409.13	-0.242652	0.0102153	-0.00635215	0.00277407	0.000359069	-1.63673e-08
410.3	-0.260316	0.0104865	-0.00644768	0.00284777	0.000357544	3.9013e-06
411.48	-0.278348	0.0107622	-0.0065443	0.0029226	0.000355926	7.90316e-06
412.64	-0.296758	0.0110424	-0.00664202	0.00299857	0.000354211	1.19919e-05
413.81	-0.315576	0.0113275	-0.00674086	0.00307573	0.000352389	1.61733e-05
414.97	-0.334792	0.0116173	-0.00684083	0.00315408	0.000350464	2.04455e-05
416.13	-0.354378	0.0119116	-0.00694192	0.00323358	0.000348447	2.48032e-05
417.29	-0.374353	0.0122106	-0.00704413	0.00331426	0.00034633	2.925e-05
418.45	-0.394726	0.0125144	-0.00714749	0.00339613	0.000344112	3.37879e-05
419.6	-0.415449	0.0128222	-0.00725158	0.00347906	0.000341782	3.84132e-05
420.75	-0.436466	0.0131329	-0.00735579	0.00356286	0.000339324	4.31228e-05
421.9	-0.457733	0.0134458	-0.00745976	0.00364739	0.000336729	4.79129e-05
423.05	-0.479182	0.0137599	-0.00756293	0.00373245	0.000333988	5.2777e-05
424.19	-0.500801	0.0140748	-0.00766508	0.003818	0.000331091	5.77164e-05
425.33	-0.522598	0.0143906	-0.00776613	0.00390402	0.000328029	6.27338e-05
426.47	-0.544512	0.0147062	-0.0078655	0.00399033	0.000324786	6.78252e-05
427.6	-0.566493	0.0150205	-0.00796263	0.00407675	0.000321346	7.2988e-05
428.74	-0.588531	0.0153336	-0.0080575	0.00416327	0.00031771	7.82212e-05
429.87	-0.610614	0.0156454	-0.00815008	0.00424986	0.000313882	8.35221e-05
431	-0.632727	0.0159554	-0.00824022	0.00433649	0.000309859	8.88901e-05
432.12	-0.654871	0.0162639	-0.00832796	0.00442316	0.00030564	9.43254e-05
433.25	-0.676983	0.0165696	-0.0084127	0.00450969	0.000301213	9.98234e-05
434.37	-0.698981	0.0168712	-0.0084936	0.00459578	0.000296554	0.000105379
435.49	-0.720835	0.0171682	-0.00857045	0.00468138	0.00029166	0.000110988
436.6	-0.742501	0.0174598	-0.00864288	0.00476634	0.000286523	0.000116649
437.72	-0.763992	0.0177462	-0.00871087	0.00485068	0.000281139	0.000122363
438.83	-0.785364	0.0180282	-0.00877481	0.00493457	0.000275508	0.000128138
439.94	-0.806607	0.0183055	-0.00883451	0.00501795	0.000269623	0.000133974
441.04	-0.827732	0.0185783	-0.00888993	0.00510083	0.000263474	0.000139875
442.22	-0.848734	0.0188463	-0.008941	0.00518321	0.000257061	0.000145841
443.4	-0.869578	0.0191091	-0.00898745	0.00526497	0.000250379	0.000151867
444.57	-0.890293	0.0193669	-0.00902944	0.00534621	0.000243424	0.00015796
445.73	-0.910908	0.0196204	-0.00906712	0.00542699	0.000236198	0.000164122
446.89	-0.931348	0.0198681	-0.00909981	0.00550707	0.000228682	0.000170348
448.05	-0.951521	0.0201085	-0.00912665	0.00558618	0.000220858	0.000176632
449.21	-0.971378	0.0203407	-0.00914717	0.00566415	0.000212712	0.000182968
450.36	-0.990832	0.0205633	-0.0091606	0.00574071	0.000204228	0.000189352
451.52	-1.00989	0.0207763	-0.00916688	0.00581588	0.000195401	0.000195784
452.67	-1.0286	0.0209804	-0.00916636	0.00588979	0.00018623	0.000202271
453.82	-1.0469	0.0211746	-0.00915842	0.00596223	0.000176701	0.00020881
454.96	-1.06475	0.021358	-0.00914261	0.00603308	0.000166799	0.000215397
456.11	-1.08217	0.0215311	-0.00911918	0.0061024	0.000156532	0.000222034
457.25	-1.09918	0.0216941	-0.00908829	0.00617025	0.000145908	0.000228722
458.39	-1.11579	0.0218475	-0.00905017	0.00623672	0.00013493	0.000235462
459.53	-1.13206	0.0219922	-0.00900531	0.00630198	0.000123611	0.000242258
460.66	-1.14795	0.0221274	-0.00895338	0.00636591	0.000111944	0.000249109
461.8	-1.16341	0.0222523	-0.0088938	0.00642833	9.99128e-05	0.000256009
462.93	-1.17845	0.0223673	-0.00882683	0.00648932	8.75269e-05	0.00026296
464.06	-1.19308	0.0224723	-0.00875254	0.00654891	7.47904e-05	0.000269962
465.19	-1.20729	0.0225673	-0.00867076	0.00660704	6.16945e-05	0.000277015
466.31	-1.22108	0.0226522	-0.00858145	0.00666373	4.82331e-05	0.000284122
467.43	-1.23444	0.0227266	-0.0084844	0.00671892	3.43988e-05	0.000291283
468.55	-1.24735	0.0227901	-0.00837925	0.00677251	2.01789e-05	0.000298497
469.67	-1.25982	0.022843	-0.00826628	0.00682458	5.58057e-06	0.000305765
470.79	-1.27188	0.022886	-0.00814586	0.00687526	-9.38278e-06	0.000313089
471.91	-1.28355	0.0229192	-0.00801795	0.00692455	-2.47151e-05	0.000320471
473.02	-1.29483	0.0229427	-0.00788267	0.00697249	-4.04152e-05	0.000327912
474.13	-1.30566	0.0229553	-0.00773937	0.00701888	-5.64999e-05	0.000335408
475.24	-1.31593	0.0229551	-0.00758694	0.00706335	-7.29995e-05	0.000342952
476.34	-1.32559	0.0229414	-0.00742497	0.00710576	-8.99242e-05	0.00035054
477.45	-1.33457	0.0229129	-0.00725276	0.00714589	-0.000107291	0.000358168
478.55	-1.34284	0.0228689	-0.00706995	0.00718361	-0.000125112	0.000365834
479.65	-1.35041	0.0228095	-0.00687651	0.00721895	-0.000143391	0.000373539
480.75	-1.35718	0.0227332	-0.0066716	0.00725161	-0.00016215	0.000381278
481.85	-1.36307	0.0226385	-0.00645438	0.00728132	-0.000181414	0.000389046
482.94	-1.36812	0.0225259	-0.00622513	0.0073082	-0.000201173	0.000396846
484.03	-1.37236	0.0223962	-0.00598428	0.00733237	-0.000221417	0.000404678
485.12	-1.3758	0.0222493	-0.00573184	0.00735385	-0.000242144	0.000412546
486.21	-1.37848	0.0220861	-0.00546824	0.00737279	-0.000263345	0.000420451
487.3	-1.38033	0.0219053	-0.0051928	0.00738897	-0.000285038	0.000428389
488.38	-1.38123	0.0217049	-0.00490436	0.007402	-0.000307254	0.000436353
489.46	-1.3812	0.0214851	-0.00460301	0.00741193	-0.00032999	0.000444343
490.54	-1.38021	0.0212455	-0.00428858	0.00741869	-0.00035325	0.000452358
491.62	-1.3783	0.0209864	-0.00396119	0.00742235	-0.000377037	0.000460403
492.7	-1.37554	0.0207093	-0.00362153	0.00742317	-0.000401341	0.000468485
493.77	-1.37193	0.020414	-0.00326952	0.00742113	-0.000426168	0.000476607
494.85	-1.36751	0.0201009	-0.00290519	0.00741628	-0.000451523	0.000484772
495.92	-1.36231	0.0197705	-0.00252888	0.00740873	-0.000477402	0.000492985
496.98	-1.35633	0.019423	-0.00214072	0.00739855	-0.000503799	0.000501246
498.05	-1.34965	0.0190595	-0.00174116	0.0073859	-0.000530711	0.000509563
499.11	-1.34234	0.0186811	-0.0013308	0.007371	-0.000558129	0.000517942
500.18	-1.33435	0.0182868	-0.000909095	0.00735369	-0.000586066	0.000526382
501.24	-1.32558	0.0178753	-0.000475235	0.0073337	-0.000614545	0.000534875
502.3	-1.31604	0.0174462	-2.90722e-05	0.00731099	-0.000643571	0.000543423
503.35	-1.30566	0.0169987	0.000429912	0.00728538	-0.000673158	0.000552021
504.41	-1.2945	0.0165334	0.000901395	0.00725701	-0.000703303	0.000560676
505.46	-1.28266	0.016052	0.00138454	0.0072262	-0.000733995	0.000569397
506.51	-1.27012	0.015554	0.00187965	0.00719284	-0.000765242	0.000578185
507.56	-1.25686	0.0150394	0.00238686	0.00715693	-0.000797054	0.000587041
508.61	-1.2429	0.014508	0.00290615	0.00711846	-0.000829429	0.000595964
509.65	-1.22818	0.0139592	0.00343792	0.0070773	-0.000862375	0.000604951
510.69	-1.21273	0.0133931	0.00398205	0.00703349	-0.00089589	0.000614004
511.74	-1.19655	0.01281	0.00453842	0.0069871	-0.000929972	0.000623124
512.78	-1.1796	0.0122094	0.00510737	0.00693801	-0.00096463	0.000632309
513.81	-1.16188	0.0115907	0.00568919	0.00688613	-0.000999876	0.000641559
514.85	-1.14335	0.0109536	0.00628408	0.0068314	-0.00103571	0.000650872
515.88	-1.12397	0.0102974	0.00689238	0.00677371	-0.00107215	0.000660245
516.92	-1.1038	0.00962284	0.00751374	0.00671319	-0.00110918	0.000669683
517.95	-1.08293	0.00893135	0.00814751	0.00665011	-0.0011468	0.000679198
518.97	-1.06137	0.00822317	0.0087936	0.00658451	-0.00118501	0.00068879
520	-1.03917	0.00749903	0.00945166	0.00651653	-0.0012238	0.000698468
521.03	-1.01633	0.00675886	0.0101218	0.00644616	-0.00126319	0.000708231
522.08	-0.992814	0.00600193	0.0108043	0.00637327	-0.00130318	0.000718075
523.14	-0.968656	0.00522895	0.0114988	0.006298	-0.00134376	0.000728006
524.21	-0.943897	0.00444045	0.0122052	0.00622044	-0.00138494	0.000738027
525.27	-0.918448	0.00363494	0.0129243	0.00614033	-0.00142673	0.000748134
526.33	-0.892208	0.00281061	0.0136569	0.00605733	-0.00146915	0.000758317
527.39	-0.865102	0.00196623	0.0144039	0.00597123	-0.00151223	0.000768573
528.45	-0.837009	0.00109974	0.0151663	0.00588163	-0.00155599	0.000778891
529.51	-0.807924	0.000210969	0.0159443	0.00578852	-0.00160044	0.000789272
530.56	-0.777886	-0.000699487	0.0167375	0.00569201	-0.00164557	0.000799723
531.61	-0.746795	-0.00163339	0.017547	0.00559177	-0.00169142	0.000810235
532.66	-0.71457	-0.00259214	0.0183735	0.00548755	-0.00173799	0.000820803
533.72	-0.681215	-0.00357569	0.0192171	0.00537936	-0.0017853	0.000831428
534.77	-0.64672	-0.00458424	0.0200778	0.00526718	-0.00183334	0.00084211
535.81	-0.611078	-0.00561791	0.0209557	0.00515097	-0.00188212	0.000852849
536.86	-0.574317	-0.00667629	0.0218507	0.00503083	-0.00193164	0.000863649
537.9	-0.53634	-0.00776106	0.0227636	0.00490643	-0.00198191	0.000874502
538.95	-0.497009	-0.00887457	0.0236957	0.00477737	-0.00203298	0.000885399
539.99	-0.456297	-0.0100173	0.0246473	0.00464354	-0.00208485	0.000896337
541.03	-0.414143	-0.0111903	0.0256191	0.00450476	-0.00213753	0.000907313
542.06	-0.370593	-0.0123929	0.0266106	0.00436116	-0.00219102	0.000918332
543.1	-0.325775	-0.013623	0.0276208	0.00421311	-0.00224531	0.000929407
544.13	-0.279692	-0.0148807	0.0286499	0.00406063	-0.00230039	0.000940539
545.16	-0.23239	-0.0161653	0.0296974	0.00390382	-0.00235628	0.000951734
546.19	-0.183885	-0.0174765	0.0307633	0.00374275	-0.00241296	0.000962995
547.22	-0.134145	-0.018815	0.031848	0.00357731	-0.00247045	0.000974319
548.25	-0.0832473	-0.0201795	0.0329508	0.00340772	-0.00252873	0.000985714
549.28	-0.0312764	-0.0215687	0.034071	0.00323424	-0.00258781	0.00099719
550.3	0.0218729	-0.0229843	0.0352097	0.00305654	-0.0026477	0.00100874
551.33	0.0763354	-0.0244288	0.036368	0.0028742	-0.00270843	0.00102035
552.35	0.132168	-0.025903	0.0375467	0.00268702	-0.00277002	0.00103202
553.37	0.189493	-0.0274091	0.0387466	0.00249465	-0.0028325	0.00104374
554.39	0.248266	-0.0289463	0.0399677	0.0022972	-0.00289585	0.00105551
555.41	0.308357	-0.0305127	0.0412088	0.00209505	-0.00296007	0.00106735
556.42	0.369845	-0.0321096	0.0424706	0.00188796	-0.00302517	0.00107926
557.44	0.432766	-0.0337376	0.0437537	0.00167581	-0.00309117	0.00109122
558.45	0.496962	-0.0353934	0.0450548	0.00145892	-0.0031579	0.00110322
559.46	0.562265	-0.0370729	0.0463702	0.00123756	-0.00322514	0.00111521
560.47	0.628521	-0.0387729	0.047697	0.00101206	-0.00329273	0.00112717
561.48	0.695495	-0.0404885	0.049031	0.000782927	-0.00336047	0.00113906
562.48	0.763165	-0.0422189	0.050371	0.000550125	-0.00342827	0.00115087
563.49	0.831575	-0.0439646	0.0517172	0.000313473	-0.00349612	0.00116258
564.49	0.900534	-0.0457214	0.0530655	7.33326e-05	-0.00356378	0.00117415
565.49	0.969885	-0.0474855	0.0544123	-0.000170045	-0.00363106	0.00118555
566.49	1.0396	-0.0492565	0.0557573	-0.000416578	-0.00369794	0.00119678
567.49	1.1096	-0.0510332	0.0570998	-0.000666067	-0.0037644	0.00120783
568.49	1.17984	-0.0528146	0.0584389	-0.000918443	-0.0038304	0.00121871
569.48	1.25033	-0.0546008	0.0597748	-0.00117371	-0.00389594	0.00122941
570.48	1.32085	-0.0563872	0.0611034	-0.00143147	-0.0039608	0.00123989
571.47	1.39115	-0.0581679	0.0624188	-0.00169124	-0.00402466	0.0012501
572.46	1.46112	-0.0599409	0.0637195	-0.00195281	-0.00408743	0.00126003
573.45	1.53062	-0.0617028	0.0650026	-0.00221586	-0.00414897	0.00126965
574.43	1.59969	-0.0634546	0.0662686	-0.00248058	-0.00420929	0.00127896
575.42	1.66854	-0.0652005	0.0675208	-0.00274746	-0.00426854	0.00128797
576.4	1.73715	-0.0669398	0.0687583	-0.00301654	-0.00432665	0.00129667
577.39	1.80559	-0.0686734	0.0699814	-0.00328802	-0.00438364	0.00130506
578.37	1.87382	-0.070401	0.0711898	-0.00356188	-0.00443947	0.00131312
579.35	1.94173	-0.07212	0.0723813	-0.00383785	-0.00449404	0.00132084
580.32	2.00942	-0.0738326	0.0735575	-0.00411625	-0.00454741	0.00132823
581.3	2.07701	-0.075541	0.07472	-0.00439733	-0.00459967	0.00133529
582.28	2.14425	-0.0772396	0.075864	-0.00468063	-0.00465054	0.00134198
583.25	2.21084	-0.0789219	0.0769833	-0.00496557	-0.00469969	0.00134824
584.22	2.27662	-0.0805844	0.0780747	-0.00525184	-0.00474694	0.00135404
585.19	2.34129	-0.0822206	0.0791326	-0.00553884	-0.004792	0.00135934
586.16	2.40489	-0.083831	0.080157	-0.00582672	-0.00483484	0.00136412
587.13	2.46761	-0.0854196	0.081151	-0.00611594	-0.00487562	0.00136839
588.09	2.52924	-0.0869817	0.0821103	-0.00640612	-0.0049141	0.00137213
589.06	2.58966	-0.0885143	0.083032	-0.00669705	-0.0049501	0.00137529
590.02	2.64893	-0.0900191	0.0839178	-0.00698886	-0.00498373	0.00137789
590.98	2.70707	-0.0914969	0.0847685	-0.00728155	-0.00501506	0.00137996
592	2.76416	-0.0929493	0.0855859	-0.00757528	-0.00504416	0.0013815
593.02	2.82036	-0.0943803	0.0863733	-0.00787039	-0.00507124	0.00138256
594.01	2.87555	-0.0957871	0.0871285	-0.00816664	-0.00509617	0.0013831
595.01	2.92954	-0.0971655	0.0878475	-0.00846366	-0.00511873	0.0013831
596	2.98239	-0.0985171	0.0885319	-0.00876157	-0.00513902	0.00138257
596.99	3.03409	-0.0998419	0.0891821	-0.00906031	-0.00515706	0.00138153
597.97	3.08462	-0.101139	0.089797	-0.00935991	-0.0051728	0.00137995
598.96	3.13403	-0.10241	0.0903772	-0.00966055	-0.00518624	0.00137783
599.95	3.18226	-0.103653	0.0909211	-0.00996214	-0.00519729	0.00137516
600.93	3.22923	-0.104866	0.0914268	-0.0102646	-0.00520583	0.0013719
601.91	3.27502	-0.106051	0.091896	-0.0105681	-0.00521197	0.00136808
602.89	3.31972	-0.10721	0.092331	-0.0108727	-0.00521584	0.00136373
603.87	3.36333	-0.108343	0.092732	-0.0111785	-0.00521745	0.00135884
604.85	3.40592	-0.109452	0.0930999	-0.0114857	-0.00521684	0.00135342
605.83	3.44726	-0.110532	0.0934301	-0.0117938	-0.00521376	0.00134744
606.8	3.487	-0.111574	0.0937152	-0.0121022	-0.00520778	0.0013408
607.78	3.525	-0.112576	0.0939523	-0.0124106	-0.00519876	0.00133348
608.75	3.56103	-0.113533	0.0941365	-0.0127186	-0.00518642	0.00132544
609.72	3.59498	-0.114441	0.0942654	-0.0130261	-0.00517063	0.00131665
610.69	3.62688	-0.115302	0.0943393	-0.0133331	-0.00515138	0.00130711
611.66	3.65645	-0.116108	0.0943523	-0.0136391	-0.00512836	0.00129676
612.63	3.68344	-0.116856	0.0942989	-0.0139437	-0.00510123	0.00128553
613.59	3.70793	-0.117545	0.0941809	-0.014247	-0.00507012	0.00127345
614.56	3.73004	-0.11818	0.0940012	-0.0145493	-0.00503519	0.00126056
615.52	3.74977	-0.11876	0.0937599	-0.0148506	-0.00499645	0.00124685
616.48	3.76727	-0.119288	0.0934601	-0.0151511	-0.00495407	0.00123235
617.44	3.78231	-0.119761	0.0930972	-0.0154505	-0.00490779	0.00121702
618.4	3.79453	-0.120168	0.0926632	-0.015748	-0.00485716	0.00120078
619.36	3.80394	-0.120512	0.0921588	-0.0160438	-0.00480223	0.00118364
620.31	3.81049	-0.12079	0.0915828	-0.0163377	-0.00474293	0.00116558
621.27	3.81427	-0.121004	0.0909365	-0.01663	-0.00467931	0.00114661
622.22	3.81558	-0.121162	0.0902253	-0.0169214	-0.00461166	0.00112677
623.17	3.81444	-0.121262	0.0894491	-0.0172119	-0.00453996	0.00110605
624.12	3.81093	-0.121307	0.0886088	-0.0175018	-0.00446422	0.00108444
625.07	3.80519	-0.1213	0.0877069	-0.0177914	-0.00438459	0.00106198
626.02	3.79725	-0.12124	0.0867443	-0.0180808	-0.00430112	0.00103866
626.97	3.78733	-0.121134	0.0857249	-0.0183705	-0.004214	0.00101452
627.91	3.77569	-0.120986	0.0846532	-0.0186611	-0.00412346	0.000989583
628.86	3.76216	-0.120793	0.0835256	-0.0189522	-0.00402932	0.000963821
629.8	3.74647	-0.120548	0.0823366	-0.0192435	-0.00393124	0.000937175
630.74	3.72859	-0.120252	0.0810853	-0.0195348	-0.00382919	0.000909635
631.68	3.70835	-0.119899	0.0797682	-0.0198258	-0.00372296	0.000881166
632.62	3.68591	-0.119494	0.0783879	-0.020117	-0.00361269	0.000851784
633.56	3.66165	-0.119044	0.0769513	-0.0204092	-0.00349872	0.000821539
634.5	3.63548	-0.118547	0.0754563	-0.0207022	-0.00338094	0.000790409
635.43	3.60741	-0.118004	0.0739025	-0.0209961	-0.0032593	0.00075838
636.36	3.57744	-0.117414	0.0722899	-0.0212911	-0.00313382	0.000725455
637.3	3.54539	-0.116774	0.0706156	-0.0215866	-0.00300435	0.000691614
638.23	3.51132	-0.116085	0.0688806	-0.0218828	-0.00287092	0.00065686
639.16	3.47527	-0.115348	0.0670858	-0.0221798	-0.0027336	0.000621206
640.09	3.43715	-0.11456	0.065229	-0.0224775	-0.00259226	0.000584628
641.01	3.39687	-0.113721	0.0633083	-0.0227758	-0.00244679	0.000547103
641.94	3.35435	-0.112828	0.0613224	-0.0230744	-0.00229711	0.000508621
642.86	3.30946	-0.111878	0.0592687	-0.0233732	-0.0021431	0.000469161
643.79	3.26239	-0.110876	0.0571504	-0.0236726	-0.00198491	0.000428741
644.71	3.21343	-0.109827	0.0549726	-0.0239732	-0.0018228	0.000387398
645.63	3.16268	-0.108733	0.0527365	-0.0242754	-0.00165682	0.000345135
646.55	3.11032	-0.107598	0.0504451	-0.0245795	-0.0014871	0.000301967
647.47	3.05632	-0.106423	0.0480982	-0.0248856	-0.00131365	0.000257892
648.38	3.00054	-0.105202	0.0456929	-0.0251933	-0.0011363	0.00021289
649.3	2.94313	-0.10394	0.0432319	-0.0255031	-0.000955201	0.000166977
650.21	2.88423	-0.10264	0.0407175	-0.0258151	-0.000770459	0.000120168
651.13	2.82354	-0.101295	0.0381439	-0.026129	-0.00058176	7.24094e-05
652.07	2.76073	-0.0998981	0.0355041	-0.026444	-0.000388717	2.3633e-05
653.01	2.69557	-0.0984433	0.0327935	-0.0267597	-0.000191072	-2.62051e-05
653.95	2.62765	-0.0969223	0.0300041	-0.0270754	1.16002e-05	-7.71753e-05
654.89	2.55696	-0.0953346	0.0271353	-0.0273909	0.000219347	-0.00012929
655.82	2.48364	-0.0936831	0.0241894	-0.0277068	0.000432052	-0.000182537
656.76	2.40737	-0.0919606	0.0211598	-0.0280224	0.000650088	-0.000236978
657.69	2.32789	-0.0901613	0.018041	-0.0283372	0.000873754	-0.000292669
658.62	2.24521	-0.0882855	0.0148333	-0.0286512	0.00110304	-0.000349608
659.55	2.15929	-0.0863324	0.0115359	-0.0289645	0.00133799	-0.000407802
660.48	2.07012	-0.0843017	0.00814843	-0.0292769	0.00157862	-0.000467258
661.41	1.9778	-0.0821954	0.00467252	-0.0295889	0.00182486	-0.000527965
662.34	1.882	-0.0800064	0.00110169	-0.0298996	0.00207706	-0.000589982
663.26	1.78228	-0.0777248	-0.00257306	-0.0302083	0.00233571	-0.000653395
664.19	1.67854	-0.0753487	-0.00635362	-0.0305149	0.00260093	-0.000718224
665.11	1.57059	-0.0728736	-0.010244	-0.0308189	0.00287291	-0.000784504
666.03	1.45859	-0.070303	-0.0142414	-0.0311208	0.00315154	-0.00085222
666.95	1.34298	-0.0676461	-0.0183379	-0.0314214	0.0034364	-0.000921309
667.87	1.22377	-0.0649034	-0.0225334	-0.031721	0.0037275	-0.000991777
668.79	1.10114	-0.0620781	-0.0268254	-0.0320199	0.00402471	-0.00106361
669.71	0.975141	-0.0591716	-0.0312127	-0.0323183	0.00432798	-0.0011368
670.63	0.845664	-0.0561814	-0.0356978	-0.032616	0.00463744	-0.00121138
671.54	0.712984	-0.0531133	-0.0402756	-0.0329136	0.00495284	-0.00128729
672.45	0.577386	-0.0499735	-0.044941	-0.0332117	0.00527391	-0.00136452
673.37	0.438528	-0.0467543	-0.049701	-0.0335098	0.00560103	-0.00144312
674.28	0.295966	-0.043446	-0.0545643	-0.0338069	0.00593469	-0.00152317
675.19	0.149517	-0.0400445	-0.0595348	-0.0341027	0.00627509	-0.00160471
676.1	-0.00122605	-0.036541	-0.0646206	-0.0343965	0.00662268	-0.00168781
677.01	-0.1561	-0.0329387	-0.0698188	-0.0346885	0.00697731	-0.00177247
677.91	-0.314667	-0.0292471	-0.0751215	-0.0349799	0.00733857	-0.0018586
678.82	-0.477176	-0.0254606	-0.0805339	-0.03527	0.00770675	-0.00194628
679.72	-0.643744	-0.0215766	-0.0860584	-0.0355588	0.00808199	-0.00203551
680.63	-0.813864	-0.0176041	-0.0916825	-0.0358457	0.00846339	-0.00212614
681.53	-0.987006	-0.013552	-0.0973915	-0.0361296	0.00884984	-0.00221793
682.43	-1.16268	-0.00942936	-0.103174	-0.03641	0.0092405	-0.00231074
683.33	-1.34011	-0.00525023	-0.10901	-0.0366865	0.0096341	-0.00240432
684.23	-1.51925	-0.00101487	-0.114898	-0.0369585	0.0100303	-0.00249861
685.13	-1.70024	0.00328053	-0.120841	-0.0372251	0.0104293	-0.00259362
686.02	-1.88246	0.00762522	-0.126822	-0.0374857	0.0108299	-0.00268913
686.92	-2.06544	0.0120112	-0.132828	-0.0377389	0.011231	-0.00278493
687.81	-2.24904	0.0164361	-0.138856	-0.037985	0.0116326	-0.00288102
688.71	-2.43304	0.0208949	-0.144903	-0.0382245	0.0120343	-0.00297734
689.6	-2.61726	0.0253851	-0.150965	-0.0384572	0.012436	-0.00307386
690.49	-2.80171	0.0299065	-0.157041	-0.0386833	0.0128376	-0.00317058
691.38	-2.98573	0.0344475	-0.163116	-0.0389018	0.013238	-0.00326727
692.27	-3.16849	0.0389938	-0.169167	-0.0391114	0.0136355	-0.00336361
693.16	-3.34965	0.0435393	-0.175186	-0.0393119	0.0140296	-0.00345951
694.04	-3.52872	0.0480749	-0.181162	-0.039503	0.0144194	-0.0035548
694.93	-3.70587	0.0526048	-0.187098	-0.0396842	0.0148052	-0.00364952
695.81	-3.88177	0.0571417	-0.19301	-0.0398557	0.015188	-0.00374386
696.7	-4.05635	0.0616853	-0.198895	-0.0400169	0.0155674	-0.00383779
697.58	-4.22979	0.06624	-0.204756	-0.0401671	0.0159439	-0.00393132
698.46	-4.40203	0.0708049	-0.210594	-0.0403064	0.0163171	-0.00402444
699.34	-4.57267	0.0753726	-0.216397	-0.0404346	0.0166865	-0.00411703
700.22	-4.74206	0.0799503	-0.222174	-0.0405514	0.0170525	-0.00420918
701.1	-4.91053	0.0845448	-0.227934	-0.0406569	0.0174158	-0.004301
701.97	-5.07731	0.0891421	-0.233655	-0.0407501	0.0177748	-0.00439221
702.85	-5.24144	0.0937256	-0.239315	-0.0408296	0.0181278	-0.00448247
703.73	-5.4024	0.0982859	-0.244898	-0.0408949	0.0184739	-0.00457158
704.61	-5.55925	0.102806	-0.250383	-0.0409449	0.0188113	-0.00465924
705.49	-5.71211	0.107289	-0.255771	-0.0409793	0.0191401	-0.00474544
706.37	-5.86157	0.111747	-0.261076	-0.040998	0.0194614	-0.00483038
707.25	-6.00699	0.116169	-0.266282	-0.0410002	0.0197737	-0.00491382
708.13	-6.14794	0.120546	-0.271377	-0.0409849	0.0200764	-0.00499559
709.01	-6.28465	0.124884	-0.276368	-0.0409526	0.0203699	-0.00507578
709.89	-6.41713	0.129182	-0.281257	-0.0409042	0.0206545	-0.00515446
710.76	-6.54564	0.133445	-0.286051	-0.0408398	0.0209305	-0.00523173
711.64	-6.67069	0.137682	-0.290763	-0.0407605	0.021199	-0.00530777
712.53	-6.79186	0.141885	-0.295383	-0.0406656	0.0214594	-0.00538247
713.42	-6.90855	0.146045	-0.299897	-0.0405545	0.0217104	-0.0054556
714.3	-7.02095	0.150164	-0.304308	-0.0404277	0.0219526	-0.00552725
715.18	-7.12901	0.15424	-0.308619	-0.0402857	0.022186	-0.00559744
716.06	-7.23266	0.158274	-0.312826	-0.0401279	0.0224103	-0.00566614
716.94	-7.33206	0.16227	-0.316932	-0.0399538	0.0226257	-0.00573336
717.82	-7.42702	0.166224	-0.320933	-0.0397631	0.0228319	-0.00579904
718.7	-7.5173	0.170132	-0.324821	-0.039555	0.0230282	-0.00586305
719.58	-7.60313	0.174	-0.328604	-0.0393299	0.0232152	-0.00592551
720.46	-7.68474	0.177829	-0.332288	-0.039089	0.0233936	-0.00598656
721.33	-7.76218	0.181623	-0.335876	-0.038832	0.0235633	-0.00604619
722.21	-7.83562	0.185384	-0.33937	-0.0385591	0.0237246	-0.00610447
723.08	-7.90436	0.1891	-0.342755	-0.0382691	0.0238763	-0.00616115
723.95	-7.9673	0.192751	-0.345999	-0.0379603	0.0240162	-0.0062158
724.83	-8.02397	0.196331	-0.349092	-0.0376319	0.0241435	-0.00626826
725.7	-8.07361	0.199825	-0.352014	-0.0372831	0.0242566	-0.00631826
726.57	-8.1159	0.203229	-0.354756	-0.0369131	0.024355	-0.00636567
727.43	-8.15092	0.206544	-0.357321	-0.0365216	0.0244388	-0.0064105
728.3	-8.17778	0.209755	-0.359684	-0.0361072	0.0245062	-0.00645243
729.17	-8.19568	0.212848	-0.361826	-0.0356685	0.0245556	-0.00649115
730.03	-8.20488	0.215828	-0.363752	-0.0352061	0.0245877	-0.00652676
730.9	-8.20572	0.218701	-0.365474	-0.0347208	0.0246032	-0.00655943
731.76	-8.19822	0.221467	-0.366992	-0.0342129	0.0246021	-0.00658918
732.62	-8.1828	0.224134	-0.368318	-0.0336829	0.0245854	-0.00661618
733.48	-8.15877	0.22669	-0.369434	-0.0331299	0.0245516	-0.00664017
734.35	-8.12496	0.229115	-0.370309	-0.0325519	0.0244986	-0.00666071
735.2	-8.08143	0.231409	-0.370945	-0.031949	0.0244265	-0.00667783
736.06	-8.02797	0.233569	-0.371338	-0.0313212	0.0243349	-0.00669148
736.92	-7.96487	0.235602	-0.371493	-0.0306683	0.0242242	-0.00670173
737.78	-7.89309	0.237525	-0.371435	-0.0299909	0.0240962	-0.0067089
738.63	-7.81271	0.23934	-0.371165	-0.0292885	0.0239509	-0.00671299
739.49	-7.72398	0.241054	-0.370689	-0.0285608	0.0237884	-0.00671405
740.34	-7.62731	0.242673	-0.370016	-0.0278081	0.0236097	-0.00671224
741.19	-7.52283	0.2442	-0.369151	-0.0270309	0.023415	-0.00670762
742.04	-7.41123	0.245648	-0.368111	-0.0262293	0.0232054	-0.0067004
742.89	-7.29331	0.247033	-0.366915	-0.0254039	0.0229823	-0.00669086
743.74	-7.16853	0.248345	-0.36555	-0.0245539	0.0227447	-0.0066788
744.59	-7.03605	0.24957	-0.363994	-0.0236779	0.022491	-0.00666389
745.44	-6.89576	0.250706	-0.362243	-0.0227757	0.022221	-0.00664611
746.29	-6.74709	0.251743	-0.360284	-0.0218463	0.0219336	-0.00662525
747.13	-6.5906	0.252692	-0.35813	-0.0208901	0.0216297	-0.00660147
747.98	-6.42745	0.253575	-0.35581	-0.0199075	0.0213112	-0.00657517
748.82	-6.2574	0.254388	-0.353316	-0.0188981	0.0209778	-0.00654623
749.68	-6.08044	0.255132	-0.350648	-0.0178614	0.0206292	-0.00651465
750.54	-5.89656	0.255807	-0.347807	-0.0167975	0.0202655	-0.00648042
751.4	-5.70522	0.256402	-0.344779	-0.015706	0.0198858	-0.00644338
752.26	-5.50655	0.256921	-0.341568	-0.0145872	0.0194903	-0.0064036
753.12	-5.3007	0.257367	-0.338179	-0.0134412	0.0190795	-0.00636112
753.97	-5.08732	0.257733	-0.334603	-0.0122676	0.0186526	-0.00631583
754.83	-4.86618	0.258016	-0.330833	-0.0110657	0.0182091	-0.00626764
755.68	-4.63702	0.258211	-0.326863	-0.00983529	0.0177486	-0.00621645
756.53	-4.39937	0.25831	-0.322683	-0.00857613	0.0172703	-0.00616215
757.39	-4.15386	0.258326	-0.318306	-0.00728829	0.0167753	-0.00610489
758.24	-3.90143	0.258276	-0.313757	-0.00597222	0.0162651	-0.00604501
759.09	-3.64235	0.258165	-0.309042	-0.00462777	0.0157401	-0.00598256
759.94	-3.37722	0.258006	-0.304174	-0.00325495	0.0152012	-0.00591773
760.78	-3.10598	0.257798	-0.299152	-0.00185372	0.0146484	-0.0058505
761.63	-2.82809	0.25753	-0.293964	-0.000423857	0.0140809	-0.00578072
762.48	-2.54408	0.257214	-0.288623	0.00103451	0.0134994	-0.00570855
763.32	-2.25436	0.256857	-0.283139	0.00252122	0.0129046	-0.00563413
764.17	-1.958	0.256442	-0.277488	0.00403745	0.0122949	-0.00555712
765.01	-1.65394	0.255952	-0.271643	0.00558475	0.0116683	-0.00547715
765.85	-1.3414	0.255373	-0.265585	0.00716406	0.0110233	-0.00539393
766.69	-1.01909	0.254681	-0.259281	0.0087768	0.0103576	-0.00530704
767.54	-0.686986	0.253877	-0.252729	0.0104234	0.00967111	-0.00521643
768.38	-0.345541	0.252969	-0.245941	0.0121039	0.00896454	-0.00512225
769.21	0.00630443	0.25194	-0.23889	0.0138196	0.00823592	-0.00502412
770.05	0.369373	0.250775	-0.231555	0.0155718	0.0074837	-0.00492174
770.89	0.743622	0.249474	-0.223936	0.0173606	0.00670795	-0.00481512
771.73	1.12919	0.248037	-0.216031	0.019186	0.00590846	-0.00470424
772.56	1.52613	0.246462	-0.207839	0.0210482	0.00508512	-0.00458907
773.39	1.93416	0.244755	-0.199366	0.0229471	0.00423843	-0.00446971
774.23	2.35429	0.242898	-0.190588	0.0248839	0.00336652	-0.0043458
775.06	2.78795	0.240865	-0.181467	0.0268607	0.00246673	-0.00421683
775.89	3.23544	0.238653	-0.171996	0.0288777	0.00153853	-0.0040827
776.72	3.6974	0.236249	-0.162158	0.0309358	0.000580747	-0.00394318
777.55	4.17332	0.233663	-0.151968	0.0330349	-0.000405766	-0.00379844
778.38	4.66181	0.230923	-0.141458	0.0351739	-0.0014186	-0.00364894
779.21	5.16279	0.228029	-0.130631	0.0373531	-0.00245771	-0.00349469
780.04	5.67576	0.224991	-0.119498	0.0395725	-0.00352226	-0.00333586
780.86	6.20052	0.221814	-0.108065	0.041832	-0.00461194	-0.00317249
781.69	6.73744	0.218492	-0.0963227	0.0441322	-0.00572741	-0.00300447
782.51	7.28563	0.215041	-0.0842924	0.0464726	-0.00686717	-0.00283209
783.34	7.84421	0.211477	-0.0719966	0.0488524	-0.00802965	-0.00265565
784.16	8.41426	0.207783	-0.0594076	0.0512732	-0.00921689	-0.00247475
784.98	8.9972	0.203932	-0.0464893	0.0537367	-0.0104315	-0.00228891
785.8	9.59364	0.199915	-0.0332268	0.0562436	-0.0116745	-0.0020979
786.62	10.2049	0.195708	-0.019587	0.0587957	-0.0129483	-0.00190128
787.44	10.8304	0.191321	-0.00558264	0.0613927	-0.0142522	-0.00169921
788.26	11.4687	0.18678	0.0087517	0.0640336	-0.0155835	-0.00149214
789.1	12.1208	0.182072	0.0234363	0.0667194	-0.0169439	-0.00127981
789.93	12.7869	0.177191	0.0384812	0.0694511	-0.0183341	-0.00106206
790.76	13.4661	0.172194	0.0538539	0.0722257	-0.0197506	-0.000839525
791.58	14.1576	0.167157	0.069524	0.0750396	-0.0211897	-0.00061289
792.41	14.8603	0.162133	0.0854592	0.0778903	-0.022648	-0.000382758
793.24	15.5725	0.157205	0.101609	0.0807739	-0.0241205	-0.000150056
794.07	16.2946	0.152396	0.117974	0.0836894	-0.0256067	8.51068e-05
794.89	17.027	0.147701	0.134567	0.0866375	-0.0271072	0.000322895
795.72	17.7686	0.1432	0.151352	0.0896143	-0.0286178	0.00056253
796.54	18.5188	0.13896	0.168301	0.0926167	-0.030135	0.000803383
797.36	19.2773	0.13499	0.185404	0.0956446	-0.0316582	0.00104533
798.18	20.0432	0.131307	0.202644	0.0986975	-0.0331861	0.00128811
799.01	20.8163	0.12793	0.220011	0.101775	-0.0347175	0.00153156
799.83	21.5966	0.124861	0.237504	0.104877	-0.0362527	0.00177566
800.65	22.3828	0.122178	0.255084	0.108	-0.037787	0.00201961
801.46	23.1735	0.119988	0.272699	0.111138	-0.0393146	0.00226235
802.28	23.968	0.118327	0.290328	0.114291	-0.0408335	0.00250348
803.1	24.7652	0.117251	0.307938	0.117455	-0.0423402	0.00274239
803.92	25.5658	0.11675	0.325546	0.120632	-0.043836	0.0029793
804.73	26.3713	0.116763	0.343196	0.123825	-0.045325	0.003215
805.55	27.1819	0.117309	0.360888	0.127034	-0.0468068	0.00344941
806.36	27.9981	0.118381	0.378638	0.130259	-0.0482823	0.00368271
807.17	28.82	0.119988	0.396444	0.1335	-0.0497512	0.00391486
807.99	29.6466	0.122174	0.414279	0.136756	-0.0512109	0.00414536
808.8	30.4789	0.124909	0.432169	0.140028	-0.0526637	0.00437465
809.61	31.3177	0.128165	0.450138	0.143318	-0.0541117	0.00460313
810.42	32.1616	0.132036	0.468138	0.146623	-0.0555496	0.00482983
811.23	33.0087	0.136636	0.486109	0.149935	-0.0569709	0.00505356
812.04	33.8582	0.142031	0.504018	0.153252	-0.0583719	0.00527366
812.84	34.708	0.148327	0.521807	0.156569	-0.0597464	0.00548898
813.65	35.5588	0.155525	0.539485	0.159887	-0.0610951	0.00569965
814.46	36.412	0.163568	0.557095	0.163208	-0.0624217	0.00590638
815.26	37.2663	0.172538	0.574598	0.166529	-0.0637218	0.00610838
816.07	38.1212	0.18249	0.591969	0.169848	-0.0649926	0.00630511
816.87	38.977	0.193398	0.609222	0.173166	-0.0662357	0.00649687
817.67	39.8334	0.205248	0.626354	0.176484	-0.0674514	0.00668372
818.47	40.6911	0.218011	0.643384	0.179804	-0.0686415	0.00686599
819.28	41.551	0.231626	0.660342	0.18313	-0.0698098	0.00704435
820.08	42.4122	0.24614	0.677204	0.18646	-0.0709535	0.0072183
820.88	43.2736	0.261629	0.693932	0.18979	-0.0720684	0.00738709
821.68	44.1355	0.278066	0.710536	0.193122	-0.0731559	0.00755096
822.47	44.9976	0.295448	0.727012	0.196456	-0.0742161	0.0077099
823.27	45.8601	0.313795	0.743359	0.199793	-0.0752484	0.00786382
824.07	46.7234	0.3331	0.75959	0.203131	-0.0762535	0.00801289
824.86	47.5873	0.353391	0.775696	0.206472	-0.0772303	0.00815687
825.66	48.4517	0.374709	0.791665	0.209813	-0.078177	0.00829547
826.45	49.3168	0.397022	0.807509	0.213155	-0.0790952	0.00842898
827.25	50.1828	0.420291	0.823243	0.216503	-0.079987	0.00855775
828.04	51.05	0.444519	0.83887	0.219855	-0.0808526	0.00868183
828.83	51.9188	0.469687	0.854403	0.223213	-0.0816932	0.00880145
829.62	52.7879	0.495884	0.869799	0.226573	-0.0825039	0.00891574
830.41	53.6554	0.523253	0.884991	0.229929	-0.0832771	0.00902327
831.2	54.5205	0.551848	0.899951	0.233277	-0.0840096	0.00912351
831.99	55.3817	0.581764	0.914632	0.236613	-0.0846962	0.00921547
832.78	56.2386	0.613046	0.929015	0.239935	-0.0853346	0.00929877
833.56	57.0914	0.645693	0.943108	0.243245	-0.0859253	0.00937349
834.35	57.9387	0.679817	0.956858	0.246536	-0.0864622	0.00943853
835.14	58.779	0.715523	0.970216	0.249803	-0.0869396	0.00949286
835.92	59.6128	0.752779	0.983198	0.253049	-0.0873595	0.00953683
836.7	60.4406	0.791536	0.995825	0.256277	-0.0877244	0.0095709
837.49	61.2625	0.831792	1.0081	0.259487	-0.0880346	0.00959513
838.27	62.0792	0.873497	1.02004	0.262682	-0.0882931	0.00961006
839.05	62.8895	0.916737	1.03162	0.265858	-0.0884951	0.00961482
839.83	63.6913	0.961663	1.04276	0.269008	-0.0886325	0.00960793
840.61	64.4848	1.00827	1.05346	0.272133	-0.0887057	0.00958948
841.39	65.2695	1.05657	1.06371	0.275232	-0.0887135	0.00955923
842.17	66.0463	1.10656	1.07354	0.278306	-0.0886577	0.00951754
842.95	66.8172	1.15812	1.083	0.281362	-0.0885447	0.00946559
843.73	67.5827	1.21126	1.09211	0.284398	-0.088375	0.00940345
844.5	68.3434	1.26597	1.10088	0.287418	-0.0881501	0.00933143
845.28	69.1003	1.3222	1.10935	0.290423	-0.0878728	0.00925004
846.05	69.8537	1.37993	1.11752	0.293415	-0.0875441	0.00915946
846.83	70.605	1.4391	1.12543	0.296397	-0.0871686	0.00906054
847.6	71.356	1.49962	1.13316	0.299375	-0.0867517	0.00895428
848.37	72.1059	1.56156	1.14065	0.302345	-0.0862897	0.00884
849.15	72.8531	1.62502	1.14786	0.305302	-0.0857768	0.00871665
849.92	73.5974	1.69003	1.15479	0.308247	-0.0852122	0.00858409
850.69	74.338	1.75665	1.16139	0.311175	-0.084592	0.00844162
851.46	75.0761	1.82484	1.16771	0.31409	-0.08392	0.0082899
852.23	75.8142	1.89446	1.17383	0.316999	-0.0832038	0.00813039
852.99	76.552	1.96556	1.17974	0.319899	-0.0824417	0.00796277
853.76	77.2898	2.03815	1.18543	0.322792	-0.0816337	0.00778702
854.53	78.0276	2.11222	1.19091	0.325678	-0.0807798	0.00760315
855.29	78.764	2.18784	1.19613	0.328553	-0.0798763	0.0074105
856.06	79.4996	2.265	1.20112	0.33142	-0.0789244	0.00720927
856.82	80.2344	2.34367	1.20588	0.334278	-0.0779251	0.00699965
857.59	80.9681	2.42391	1.21039	0.337128	-0.076876	0.00678122
858.35	81.7002	2.50574	1.21464	0.339967	-0.0757755	0.00655368
859.11	82.4302	2.58921	1.2186	0.342794	-0.0746219	0.00631672
859.87	83.1573	2.67435	1.22226	0.345607	-0.0734122	0.00606979
860.64	83.8828	2.76112	1.22566	0.34841	-0.0721504	0.00581365
861.4	84.6089	2.84941	1.22885	0.351207	-0.070843	0.00554946
862.16	85.3364	2.9392	1.23186	0.354002	-0.0694916	0.00527754
862.91	86.0667	3.03045	1.23474	0.356796	-0.0681	0.00499862
863.67	86.7998	3.12315	1.23748	0.35959	-0.066668	0.00471263
864.43	87.5344	3.21737	1.24003	0.362381	-0.0651922	0.00441896
865.19	88.2718	3.31305	1.24246	0.365173	-0.063676	0.00411824
865.94	89.0131	3.41015	1.24477	0.367968	-0.0621221	0.00381097
866.7	89.7563	3.50879	1.24691	0.370761	-0.0605243	0.00349602
867.45	90.4997	3.6091	1.24882	0.373545	-0.0588752	0.00317205
868.2	91.2416	3.71118	1.25045	0.376317	-0.0571697	0.00283811
868.96	91.9797	3.81516	1.25171	0.379069	-0.0553989	0.0024926
869.72	92.7141	3.92108	1.25261	0.3818	-0.0535625	0.00213548
870.52	93.4458	4.02888	1.25319	0.384515	-0.0516637	0.00176731
871.32	94.1729	4.13869	1.25337	0.387206	-0.0496951	0.00138677
872.12	94.8939	4.25062	1.2531	0.389868	-0.047651	0.000992835
872.92	95.609	4.36467	1.25239	0.392503	-0.0455319	0.000585568
873.72	96.3179	4.48086	1.25124	0.39511	-0.0433369	0.000164809
874.52	97.0206	4.59919	1.24963	0.397689	-0.0410655	-0.00026949
875.31	97.7178	4.71963	1.2476	0.400242	-0.0387199	-0.000716966
876.11	98.4075	4.84232	1.24506	0.402763	-0.036293	-0.00117889
876.91	99.0871	4.96742	1.24195	0.405244	-0.0337751	-0.00165704
877.7	99.7561	5.09498	1.23824	0.407683	-0.0311641	-0.00215178
878.49	100.413	5.22507	1.23388	0.410078	-0.0284558	-0.00266389
879.29	101.06	5.35764	1.22893	0.41243	-0.0256535	-0.00319274
880.08	101.699	5.49254	1.22346	0.414748	-0.0227667	-0.00373661
880.87	102.33	5.62977	1.21749	0.417033	-0.0197957	-0.00429541
881.66	102.956	5.76929	1.21105	0.419287	-0.0167439	-0.00486853
882.45	103.576	5.91108	1.20416	0.421513	-0.0136126	-0.00545572
883.24	104.19	6.05519	1.19679	0.423707	-0.0103994	-0.00605741
884.02	104.799	6.20151	1.18901	0.425876	-0.00711019	-0.00667252
884.81	105.406	6.34997	1.18087	0.428025	-0.00375102	-0.00729994
885.6	106.009	6.50069	1.17231	0.430147	-0.000314406	-0.00794102
886.38	106.605	6.65384	1.16324	0.432235	0.00320931	-0.00859754
887.18	107.193	6.8095	1.15361	0.434284	0.00682415	-0.00927021
888	107.77	6.96782	1.14336	0.436289	0.010539	-0.00996066
888.81	108.338	7.12876	1.13252	0.438251	0.0143504	-0.0106682
889.63	108.899	7.29215	1.12118	0.44018	0.0182489	-0.0113912
890.45	109.452	7.45811	1.10928	0.44207	0.0222401	-0.0121306
891.27	109.997	7.62669	1.09682	0.443919	0.0263265	-0.0128869
892.09	110.535	7.79775	1.08386	0.445738	0.0305004	-0.0136562
892.9	111.065	7.9712	1.07049	0.447535	0.034755	-0.0144338
893.72	111.589	8.1469	1.0568	0.449322	0.0390822	-0.0152161
894.53	112.108	8.32467	1.0429	0.451111	0.0434698	-0.0159977
895.35	112.622	8.50452	1.02879	0.452904	0.0479183	-0.0167773
896.16	113.13	8.68651	1.01446	0.454699	0.0524318	-0.0175551
896.97	113.631	8.87052	0.999981	0.456507	0.0570013	-0.0183261
897.78	114.127	9.05644	0.985434	0.458338	0.0616206	-0.0190859
898.6	114.617	9.24425	0.970842	0.460194	0.0662875	-0.0198338
899.4	115.104	9.43387	0.956257	0.462078	0.0709969	-0.020569
900.21	115.588	9.62527	0.941704	0.463996	0.0757468	-0.02129
901	116.069	9.81846	0.927189	0.465945	0.0805368	-0.021997
901.74	116.547	10.0133	0.912816	0.46794	0.0853574	-0.0226847
902.47	117.025	10.2095	0.898709	0.469995	0.0901968	-0.0233463
903.21	117.502	10.4072	0.884926	0.472118	0.0950495	-0.0239793
903.97	117.98	10.606	0.871553	0.474316	0.0999077	-0.0245803
904.77	118.458	10.8062	0.858551	0.476588	0.104776	-0.0251499
905.58	118.933	11.0079	0.84581	0.478921	0.109665	-0.0256922
906.38	119.406	11.2112	0.833333	0.481316	0.114575	-0.026206
907.18	119.874	11.416	0.821081	0.48377	0.119512	-0.0266918
907.98	120.339	11.6225	0.809066	0.486285	0.124474	-0.0271492
908.8	120.8	11.8305	0.797357	0.488867	0.129454	-0.0275753
909.63	121.257	12.0401	0.785893	0.491511	0.13446	-0.0279721
910.46	121.709	12.2514	0.774615	0.494211	0.139498	-0.0283415
911.29	122.157	12.4643	0.763647	0.496981	0.144555	-0.0286775
912.11	122.602	12.6786	0.753139	0.499838	0.149619	-0.0289725
912.94	123.045	12.894	0.743173	0.502794	0.15468	-0.0292225
913.76	123.487	13.1105	0.733901	0.505865	0.159726	-0.0294203
914.59	123.928	13.3279	0.725297	0.509049	0.164758	-0.0295661
915.41	124.367	13.5466	0.717261	0.512336	0.169788	-0.0296636
916.23	124.802	13.7664	0.709893	0.515737	0.174805	-0.0297075
917.06	125.236	13.9872	0.703254	0.519261	0.179806	-0.0296944
917.88	125.668	14.209	0.697316	0.522904	0.184792	-0.0296259
918.7	126.099	14.4319	0.692089	0.526666	0.189763	-0.0295031
919.51	126.528	14.6559	0.687534	0.530541	0.194723	-0.0293277
920.34	126.956	14.8812	0.683576	0.53452	0.199679	-0.029104
921.17	127.384	15.1076	0.680284	0.538612	0.204625	-0.0288287
922	127.811	15.3351	0.677751	0.542828	0.209553	-0.0284971
922.83	128.239	15.5636	0.675958	0.547164	0.214464	-0.028111
923.66	128.668	15.7932	0.674918	0.551621	0.219358	-0.0276704
924.49	129.099	16.0238	0.67464	0.556201	0.224233	-0.0271744
925.31	129.529	16.2556	0.67509	0.560901	0.229095	-0.0266232
926.14	129.958	16.4885	0.676297	0.565725	0.233941	-0.0260152
926.97	130.388	16.7225	0.678292	0.570677	0.238768	-0.0253478
927.79	130.817	16.9576	0.681046	0.575753	0.243579	-0.0246232
928.62	131.246	17.1939	0.684534	0.580948	0.248377	-0.0238437
929.44	131.676	17.4315	0.688748	0.586263	0.253164	-0.0230096
930.26	132.105	17.6703	0.693661	0.591695	0.257942	-0.0221218
931.08	132.536	17.9102	0.699382	0.597255	0.262701	-0.0211747
931.9	132.967	18.151	0.706079	0.602965	0.267426	-0.0201591
932.72	133.401	18.3926	0.713824	0.608834	0.27211	-0.0190714
933.54	133.839	18.6348	0.722739	0.614876	0.276742	-0.0179055
934.37	134.28	18.8775	0.73287	0.621097	0.281317	-0.0166584
935.2	134.724	19.1208	0.744204	0.627496	0.285838	-0.0153304
936.03	135.171	19.3645	0.756873	0.634089	0.290292	-0.0139141
936.87	135.624	19.6084	0.771001	0.640892	0.294669	-0.0124028
937.7	136.08	19.8525	0.786553	0.6479	0.298971	-0.0107987
938.53	136.542	20.0971	0.803484	0.655106	0.303204	-0.00910493
939.36	137.009	20.342	0.821793	0.66251	0.307367	-0.00732163
940.19	137.48	20.5873	0.841421	0.670105	0.311467	-0.00545226
941.02	137.957	20.8331	0.862475	0.677903	0.315494	-0.00349113
941.85	138.441	21.0789	0.885131	0.685927	0.319432	-0.00142855
942.68	138.931	21.3247	0.909385	0.694176	0.323281	0.000734935
943.51	139.429	21.5707	0.935274	0.702653	0.327038	0.0030009
944.33	139.933	21.8168	0.962744	0.711353	0.330709	0.00536773
945.16	140.442	22.0633	0.991638	0.72026	0.334309	0.00782872
945.98	140.953	22.3103	1.02194	0.72937	0.337842	0.010384
946.8	141.466	22.5579	1.0536	0.738681	0.341312	0.0130325
947.62	141.981	22.8061	1.08655	0.748184	0.344727	0.0157711
948.44	142.496	23.0551	1.12078	0.757878	0.348088	0.0185988
949.26	143.011	23.3051	1.15618	0.76775	0.351406	0.0215111
950.08	143.524	23.5562	1.1926	0.777784	0.354696	0.0245021
950.9	144.035	23.8084	1.23015	0.787992	0.357949	0.0275765
951.72	144.545	24.0615	1.26893	0.798389	0.361154	0.0307411
952.53	145.055	24.3154	1.30898	0.808977	0.364309	0.0339971
953.35	145.564	24.5701	1.35038	0.819768	0.367406	0.037349
954.16	146.072	24.8256	1.39305	0.83075	0.370456	0.0407932
954.97	146.575	25.0824	1.43677	0.841902	0.373477	0.0443216
955.79	147.073	25.3404	1.4816	0.85323	0.376466	0.0479367
956.6	147.567	25.5996	1.52752	0.864734	0.379424	0.0516389
957.41	148.056	25.8601	1.57455	0.876413	0.382353	0.0554283
958.22	148.541	26.1217	1.62278	0.888279	0.385241	0.0593089
959.03	149.023	26.3844	1.67218	0.900328	0.388093	0.0632795
959.84	149.502	26.6483	1.72274	0.912558	0.39091	0.0673392
960.65	149.977	26.9134	1.77451	0.924976	0.393687	0.0714908
961.45	150.45	27.1795	1.82752	0.937587	0.396423	0.0757365
962.26	150.92	27.4467	1.88183	0.950394	0.399112	0.0800783
963.06	151.389	27.7148	1.9375	0.963407	0.401748	0.0845195
963.87	151.854	27.9841	1.99444	0.976616	0.404342	0.0890563
964.67	152.315	28.2547	2.05249	0.990001	0.406909	0.093682
965.47	152.768	28.5268	2.11159	1.00356	0.409455	0.0983954
966.28	153.213	28.8007	2.17165	1.01728	0.41199	0.103193
967.08	153.65	29.0762	2.23268	1.03116	0.414515	0.108074
967.88	154.081	29.3532	2.29476	1.04522	0.417019	0.113044
968.74	154.503	29.632	2.35782	1.05944	0.419513	0.118099
969.6	154.916	29.9126	2.42179	1.07381	0.422003	0.123235
970.46	155.321	30.1949	2.48681	1.08836	0.424476	0.128461
971.3	155.719	30.4785	2.55305	1.1031	0.426916	0.133785
972.11	156.113	30.7634	2.62062	1.11805	0.429312	0.139212
972.91	156.504	31.0491	2.68975	1.13323	0.431645	0.144754
973.74	156.891	31.3357	2.76043	1.14865	0.433914	0.15041
974.59	157.274	31.6234	2.83258	1.16428	0.436128	0.156178
975.44	157.653	31.9119	2.90638	1.18017	0.438272	0.162066
976.29	158.03	32.2011	2.98194	1.19631	0.440334	0.168081
977.14	158.405	32.4909	3.05926	1.21271	0.442314	0.174222
977.99	158.779	32.7813	3.13837	1.22937	0.444211	0.180491
978.84	159.15	33.0723	3.21928	1.24629	0.446025	0.186889
979.69	159.518	33.3642	3.30194	1.26348	0.44776	0.193413
980.55	159.886	33.6565	3.38651	1.28093	0.449402	0.200072
981.42	160.255	33.9489	3.47321	1.2987	0.450929	0.206876
982.28	160.625	34.2415	3.5621	1.31677	0.452338	0.213829
983.13	160.998	34.534	3.65328	1.33516	0.453618	0.220935
983.99	161.372	34.8266	3.74667	1.35386	0.454779	0.228191
984.85	161.744	35.1198	3.84203	1.37285	0.455844	0.235587
985.71	162.114	35.4135	3.93934	1.39212	0.456815	0.243123
986.56	162.48	35.7079	4.03854	1.41167	0.4577	0.250796
987.42	162.841	36.0031	4.13957	1.4315	0.458503	0.258605
988.27	163.198	36.299	4.24251	1.4516	0.45922	0.266552
989.12	163.549	36.5959	4.3472	1.47196	0.459865	0.274632
989.97	163.893	36.894	4.45351	1.49257	0.460452	0.282838
990.82	164.229	37.1931	4.5616	1.51345	0.460966	0.291179
991.67	164.562	37.4928	4.6717	1.53462	0.461385	0.299666
992.53	164.891	37.793	4.7839	1.5561	0.461701	0.308304
993.4	165.219	38.0934	4.89842	1.5779	0.461895	0.317103
994.27	165.545	38.3942	5.01516	1.60003	0.461975	0.326059
995.14	165.865	38.6957	5.1339	1.62245	0.461963	0.335163
996.01	166.18	38.9978	5.25477	1.64517	0.46185	0.344421
996.88	166.492	39.3003	5.37782	1.66822	0.461629	0.353836
997.75	166.798	39.6034	5.50292	1.69159	0.461325	0.363405
998.62	167.102	39.9069	5.62998	1.7153	0.460964	0.373128
999.48	167.402	40.2108	5.75887	1.73936	0.460571	0.382999
1000.3	167.697	40.5153	5.88935	1.76377	0.460181	0.393012
1001.2	167.988	40.8202	6.02146	1.78855	0.4598	0.403171
1002.1	168.277	41.1254	6.15532	1.81371	0.45942	0.413481
1002.9	168.564	41.4307	6.29078	1.83928	0.45907	0.42394
1003.8	168.849	41.7362	6.42776	1.86526	0.458774	0.434546
1004.7	169.133	42.0417	6.56622	1.89167	0.45854	0.445299
1005.5	169.413	42.3477	6.70602	1.91847	0.458379	0.456194
1006.4	169.689	42.654	6.84713	1.94569	0.458301	0.46723
1007.2	169.96	42.9608	6.98955	1.97331	0.458306	0.478407
1008.1	170.227	43.268	7.13311	2.00136	0.458427	0.489722
1009	170.49	43.5755	7.27765	2.02984	0.458703	0.501172
1009.8	170.749	43.8834	7.42305	2.05878	0.459152	0.512752
1010.7	171.002	44.1918	7.56917	2.08815	0.459798	0.52446
1011.5	171.252	44.5005	7.71611	2.11799	0.460632	0.5363
1012.4	171.498	44.8093	7.8641	2.1483	0.461625	0.548281
1013.2	171.742	45.1182	8.01317	2.17909	0.46278	0.560407
1014.1	171.984	45.427	8.16342	2.21038	0.464087	0.572684
1015	172.225	45.7357	8.31485	2.24217	0.465551	0.585112
1015.8	172.463	46.0443	8.46732	2.27446	0.467193	0.597687
1016.7	172.7	46.3527	8.62099	2.30726	0.468996	0.610416
1017.6	172.935	46.6609	8.77596	2.34059	0.470944	0.623305
1018.5	173.169	46.9688	8.93205	2.37444	0.473077	0.636348
1019.3	173.401	47.2764	9.08904	2.40885	0.475439	0.64954
1020.2	173.633	47.5837	9.24679	2.44382	0.478056	0.662878
1021.1	173.863	47.8907	9.40506	2.47936	0.480974	0.676355
1022	174.093	48.1974	9.56392	2.51549	0.484188	0.689976
1022.9	174.323	48.5035	9.72359	2.55221	0.487671	0.703749
1023.7	174.553	48.8091	9.88391	2.58955	0.491453	0.717672
1024.6	174.784	49.114	10.0448	2.62751	0.495555	0.731744
1025.5	175.015	49.4183	10.2063	2.66609	0.499968	0.745967
1026.4	175.245	49.7223	10.3684	2.70527	0.504693	0.760336
1027.3	175.472	50.0259	10.5312	2.74506	0.509718	0.774857
1028.2	175.697	50.3292	10.6946	2.78544	0.51502	0.789531
1029.1	175.918	50.6322	10.8588	2.82641	0.52062	0.804356
1030	176.136	50.935	11.0234	2.86799	0.526546	0.819329
1030.9	176.35	51.2376	11.1885	2.91018	0.532792	0.834451
1031.8	176.558	51.5401	11.3542	2.95296	0.539361	0.84972
1032.7	176.762	51.8426	11.5203	2.99634	0.546257	0.865137
1033.6	176.961	52.1448	11.687	3.04034	0.553473	0.880709
1034.5	177.157	52.4466	11.8543	3.08496	0.561018	0.896436
1035.3	177.349	52.7481	12.0221	3.13024	0.568905	0.91232
1036.2	177.537	53.0492	12.1905	3.17615	0.577124	0.928362
1037.1	177.719	53.3502	12.3594	3.22267	0.585665	0.94456
1038	177.896	53.6509	12.5291	3.26983	0.594527	0.960918
1038.9	178.066	53.9515	12.6993	3.31761	0.603702	0.977438
1039.8	178.231	54.2518	12.8701	3.36603	0.613225	0.994117
1040.7	178.39	54.5518	13.0412	3.41512	0.623149	1.01095
1041.6	178.545	54.8514	13.2125	3.4649	0.633497	1.02793
1042.5	178.695	55.1506	13.3837	3.51538	0.644306	1.04507
1043.4	178.841	55.4494	13.5549	3.56658	0.655592	1.06235
1044.3	178.982	55.7476	13.726	3.61849	0.667352	1.07978
1045.2	179.12	56.0452	13.897	3.67115	0.679629	1.09736
1046	179.255	56.3421	14.0676	3.72458	0.692463	1.11509
1046.9	179.386	56.6383	14.2379	3.77877	0.705841	1.13296
1047.8	179.512	56.9341	14.4079	3.83371	0.71975	1.15098
1048.7	179.632	57.2294	14.5776	3.88939	0.734188	1.16914
1049.5	179.745	57.5243	14.7471	3.94581	0.749138	1.18746
1050.4	179.852	57.8187	14.9163	4.00299	0.764633	1.20593
1051.3	179.954	58.1126	15.085	4.06095	0.780729	1.22454
1052.2	180.05	58.406	15.253	4.1197	0.797424	1.24329
1053.1	180.14	58.6989	15.4205	4.17923	0.814731	1.26219
1053.9	180.223	58.9913	15.5874	4.23956	0.832635	1.28123
1054.8	180.302	59.2828	15.7541	4.30069	0.85109	1.30044
1055.7	180.376	59.5736	15.9206	4.36262	0.870095	1.31981
1056.6	180.446	59.8634	16.0871	4.42538	0.889637	1.33934
1057.5	180.513	60.1522	16.2537	4.48896	0.909698	1.35905
1058.4	180.576	60.44	16.4204	4.55335	0.930272	1.37894
1059.3	180.634	60.7268	16.5874	4.61857	0.951328	1.39901
1060.2	180.69	61.0124	16.755	4.6846	0.972827	1.41927
1061.1	180.742	61.2968	16.9231	4.75147	0.994796	1.43973
1062	180.791	61.58	17.0914	4.81919	1.01728	1.46037
1062.9	180.838	61.8619	17.26	4.88778	1.04027	1.4812
1063.8	180.882	62.1425	17.4287	4.95724	1.06382	1.50221
1064.7	180.924	62.4216	17.5977	5.02759	1.08788	1.52342
1065.7	180.965	62.6992	17.7674	5.09881	1.11241	1.54484
1066.6	181.005	62.9751	17.9378	5.17094	1.13741	1.56646
1067.5	181.044	63.2492	18.1088	5.24397	1.16289	1.58829
1068.5	181.083	63.5217	18.2805	5.31791	1.18885	1.61033
1069.4	181.12	63.7925	18.4526	5.39276	1.21532	1.63258
1070.3	181.154	64.0617	18.6254	5.46851	1.24229	1.65504
1071.2	181.186	64.3294	18.7987	5.54518	1.26975	1.67771
1072.2	181.214	64.5955	18.9725	5.62276	1.29773	1.70058
1073.1	181.24	64.86	19.1468	5.70128	1.32623	1.72367
1074	181.263	65.1228	19.3215	5.78073	1.35527	1.74696
1074.9	181.282	65.3841	19.4965	5.86112	1.38487	1.77046
1075.9	181.298	65.6438	19.6719	5.94245	1.41501	1.79418
1076.8	181.312	65.9016	19.8482	6.02473	1.44563	1.81812
1077.7	181.324	66.1575	20.0253	6.10797	1.47673	1.84229
1078.6	181.335	66.4113	20.2035	6.19217	1.50828	1.8667
1079.5	181.345	66.6631	20.3829	6.27734	1.54028	1.89134
1080.5	181.353	66.9129	20.5631	6.36348	1.57276	1.91623
1081.4	181.359	67.1606	20.7445	6.4506	1.60569	1.94135
1082.3	181.364	67.4062	20.9271	6.53869	1.63906	1.96673
1083.2	181.367	67.6497	21.1107	6.62778	1.67291	1.99235
1084.1	181.368	67.891	21.2951	6.71789	1.70729	2.0182
1085	181.368	68.1302	21.48	6.80903	1.74225	2.04429
1086	181.366	68.3672	21.6652	6.90122	1.77783	2.0706
1086.9	181.361	68.6019	21.8507	6.99448	1.81406	2.09714
1087.8	181.356	68.8344	22.0366	7.08881	1.8509	2.12391
1088.7	181.349	69.0645	22.2226	7.18423	1.88841	2.15091
1089.7	181.342	69.2922	22.4087	7.28076	1.92663	2.17814
1090.6	181.333	69.5174	22.5947	7.37842	1.96555	2.20559
1091.5	181.322	69.7403	22.7807	7.47718	2.00518	2.23327
1092.4	181.309	69.9608	22.9667	7.57708	2.04554	2.26118
1093.3	181.294	70.1788	23.1528	7.6781	2.0866	2.28932
1094.2	181.277	70.3945	23.3386	7.78027	2.12842	2.31768
1095.1	181.258	70.6076	23.5239	7.88361	2.17106	2.34626
1096	181.237	70.8183	23.7087	7.98814	2.21454	2.37506
1096.9	181.213	71.0265	23.8926	8.09386	2.25889	2.40407
1097.9	181.187	71.2321	24.076	8.20078	2.30409	2.43331
1098.8	181.159	71.435	24.2592	8.30889	2.35007	2.46278
1099.7	181.131	71.6352	24.4423	8.41821	2.39683	2.49248
1100.6	181.102	71.8324	24.6255	8.52875	2.44435	2.52244
1101.5	181.073	72.0267	24.8087	8.6405	2.49262	2.55264
1102.4	181.043	72.218	24.992	8.75348	2.54165	2.58309
1103.3	181.012	72.4063	25.1757	8.86768	2.59141	2.61381
1104.2	180.982	72.5913	25.3599	8.98311	2.64185	2.64479
1105.2	180.953	72.7733	25.5444	9.09979	2.69303	2.67603
1106.1	180.923	72.952	25.7289	9.21774	2.74502	2.70753
1107	180.893	73.1276	25.9133	9.33698	2.79783	2.73928
1108	180.862	73.3	26.0971	9.45753	2.85155	2.77127
1108.9	180.831	73.4691	26.2806	9.57939	2.90615	2.80352
1109.8	180.801	73.6347	26.4641	9.70255	2.96155	2.83603
1110.7	180.772	73.797	26.6476	9.82705	3.0178	2.8688
1111.7	180.743	73.9557	26.8309	9.95288	3.07492	2.90183
1112.6	180.715	74.1112	27.0141	10.08	3.13286	2.9351
1113.6	180.687	74.2638	27.1972	10.2083	3.19156	2.96857
1114.6	180.659	74.4137	27.3804	10.3377	3.25098	3.00224
1115.5	180.63	74.5612	27.5639	10.4682	3.31103	3.03607
1116.5	180.6	74.7065	27.7476	10.5997	3.37172	3.07005
1117.5	180.57	74.8495	27.9312	10.7322	3.43307	3.10417
1118.4	180.538	74.9907	28.115	10.8656	3.49502	3.13839
1119.4	180.505	75.1304	28.2988	10.9999	3.55755	3.17269
1120.4	180.471	75.2684	28.4827	11.1351	3.62061	3.20707
1121.3	180.435	75.4048	28.667	11.2711	3.6842	3.24154
1122.3	180.399	75.5396	28.8518	11.4079	3.74828	3.27608
1123.3	180.363	75.6726	29.037	11.5456	3.81286	3.31071
1124.3	180.326	75.8042	29.2228	11.684	3.87787	3.34539
1125.2	180.287	75.9349	29.4093	11.8231	3.94324	3.38008
1126.2	180.247	76.0648	29.5965	11.9628	4.00892	3.41477
1127.2	180.206	76.1941	29.7847	12.103	4.07487	3.44944
1128.1	180.163	76.3228	29.9736	12.2438	4.14111	3.4841
1129.1	180.12	76.4505	30.1631	12.3852	4.20772	3.51875
1130.1	180.075	76.5774	30.353	12.5272	4.27471	3.55338
1131.1	180.029	76.7035	30.5433	12.6699	4.34211	3.58799
1132.1	179.982	76.8287	30.7338	12.8132	4.40992	3.62257
1133.1	179.934	76.9532	30.9247	12.9571	4.47809	3.65712
1134.1	179.885	77.0768	31.116	13.1016	4.54666	3.69163
1135	179.835	77.1994	31.3074	13.2467	4.61569	3.72613
1136	179.784	77.3213	31.4991	13.3925	4.6851	3.76056
1137	179.732	77.4432	31.6913	13.5386	4.75478	3.79489
1138	179.678	77.5652	31.8839	13.6852	4.82469	3.8291
1138.9	179.622	77.6877	32.0773	13.8319	4.89472	3.86314
1139.9	179.564	77.8109	32.2714	13.9789	4.9649	3.897
1140.9	179.505	77.9343	32.4658	14.1263	5.03531	3.93071
1141.9	179.443	78.0584	32.6607	14.2738	5.10587	3.96423
1142.9	179.379	78.1835	32.856	14.4215	5.17656	3.99753
1143.8	179.314	78.3092	33.0519	14.5695	5.2474	4.03063
1144.8	179.247	78.4354	33.2485	14.7176	5.31837	4.06356
1145.8	179.179	78.5619	33.4458	14.8661	5.38952	4.09632
1146.8	179.11	78.6882	33.6437	15.0149	5.46088	4.12894
1147.8	179.042	78.8146	33.8423	15.1641	5.53242	4.16141
1148.8	178.972	78.9413	34.0419	15.3135	5.60409	4.19371
1149.8	178.902	79.068	34.2423	15.4632	5.67588	4.22584
1150.7	178.833	79.1947	34.4438	15.6133	5.74781	4.25782
1151.7	178.763	79.3215	34.6462	15.7636	5.81986	4.28964
1152.7	178.694	79.4482	34.8495	15.9143	5.89207	4.32129
1153.7	178.625	79.575	35.0537	16.0652	5.96441	4.35276
1154.7	178.556	79.7021	35.2587	16.2164	6.03689	4.38404
1155.6	178.487	79.8292	35.4645	16.3679	6.10951	4.41513
1156.6	178.419	79.9559	35.6713	16.5197	6.1823	4.44608
1157.6	178.353	80.0823	35.879	16.672	6.25526	4.47687
1158.6	178.288	80.2082	36.0876	16.8246	6.32842	4.50751
1159.5	178.224	80.334	36.2972	16.9775	6.4017	4.53798
1160.5	178.161	80.4603	36.508	17.1305	6.47502	4.5682
1161.5	178.098	80.5873	36.7199	17.2837	6.5483	4.59816
1162.4	178.035	80.7155	36.933	17.4368	6.62149	4.62783
1163.4	177.973	80.8449	37.1475	17.5898	6.69455	4.65717
1164.4	177.911	80.9757	37.3632	17.7428	6.76751	4.68619
1165.3	177.848	81.1081	37.5803	17.8955	6.84026	4.71484
1166.3	177.785	81.2429	37.7987	18.048	6.91275	4.74308
1167.3	177.722	81.3796	38.0185	18.2001	6.98499	4.77093
1168.2	177.659	81.518	38.2398	18.3521	7.05701	4.79841
1169.2	177.597	81.6579	38.4627	18.504	7.12882	4.82552
1170.2	177.536	81.799	38.687	18.6557	7.20047	4.85231
1171.2	177.477	81.9416	38.913	18.8072	7.27188	4.87872
1172.1	177.418	82.0864	39.1406	18.9584	7.34295	4.9047
1173.1	177.359	82.2334	39.37	19.1092	7.41367	4.93025
1174.1	177.301	82.3825	39.6012	19.2596	7.48404	4.95537
1175.1	177.245	82.5336	39.834	19.4097	7.55408	4.98006
1176	177.189	82.6863	40.0683	19.5596	7.62392	5.00436
1177	177.134	82.8407	40.3039	19.7094	7.69356	5.02826
1178	177.08	82.9965	40.5406	19.8589	7.76306	5.05175
1178.9	177.028	83.1537	40.7783	20.0083	7.83245	5.07486
1179.9	176.976	83.3119	41.0172	20.1576	7.90175	5.0976
1180.9	176.927	83.471	41.2569	20.307	7.97105	5.11999
1181.8	176.879	83.6304	41.4973	20.4564	8.04044	5.14205
1182.8	176.833	83.7906	41.7384	20.6059	8.10986	5.16377
1183.7	176.788	83.9518	41.9804	20.7554	8.17923	5.18509
1184.7	176.744	84.1142	42.2231	20.9047	8.24856	5.20602
1185.7	176.702	84.2781	42.4668	21.0539	8.31778	5.22652
1186.6	176.661	84.4431	42.7113	21.203	8.38696	5.2466
1187.6	176.622	84.6088	42.9561	21.3521	8.45624	5.26632
1188.5	176.584	84.7753	43.2013	21.5013	8.5256	5.28564
1189.5	176.547	84.9426	43.4468	21.6504	8.59505	5.30457
1190.4	176.512	85.1107	43.6926	21.7996	8.66458	5.32311
1191.4	176.479	85.2796	43.9391	21.9488	8.73415	5.34125
1192.3	176.448	85.4493	44.186	22.0979	8.80376	5.35898
1193.2	176.42	85.6196	44.4336	22.2472	8.87343	5.37632
1194.2	176.394	85.7905	44.6817	22.3963	8.94314	5.39326
1195.1	176.37	85.9623	44.9304	22.5455	9.01286	5.40978
1196.1	176.349	86.135	45.1799	22.6946	9.08257	5.42586
1197	176.331	86.3087	45.4301	22.8436	9.15221	5.44151
1198	176.316	86.4831	45.681	22.9925	9.22188	5.45673
1198.9	176.304	86.6578	45.9323	23.1415	9.29167	5.47155
1199.8	176.295	86.8327	46.1837	23.2907	9.36162	5.48598
1200.8	176.289	87.0077	46.4351	23.44	9.43182	5.50003
1201.8	176.285	87.1825	46.6866	23.5895	9.50226	5.5137
1202.8	176.286	87.3575	46.9382	23.7392	9.57288	5.52698
1203.8	176.29	87.5322	47.1899	23.889	9.64375	5.53989
1204.8	176.298	87.7065	47.4415	24.0392	9.71491	5.55243
1205.8	176.309	87.8808	47.6932	24.1895	9.78627	5.56457
1206.9	176.324	88.0557	47.9451	24.3397	9.85773	5.57624
1207.9	176.342	88.2316	48.1974	24.4899	9.9292	5.58743
1208.9	176.363	88.4089	48.4503	24.6398	10.0006	5.59807
1209.9	176.388	88.5878	48.7039	24.7894	10.0718	5.60816
1210.9	176.416	88.7679	48.9579	24.9388	10.143	5.6177
1211.9	176.447	88.95	49.2125	25.0878	10.214	5.62665
1212.9	176.481	89.1343	49.4678	25.2364	10.2848	5.63496
1213.9	176.518	89.3208	49.7238	25.3844	10.3554	5.64264
1214.9	176.559	89.5094	49.9806	25.532	10.4257	5.64969
1215.9	176.603	89.7002	50.2382	25.6791	10.4958	5.6561
1216.9	176.651	89.893	50.4965	25.8258	10.5656	5.66188
1217.9	176.702	90.0882	50.7557	25.9719	10.6352	5.66699
1218.9	176.757	90.2865	51.016	26.1173	10.7043	5.67136
1219.9	176.816	90.4881	51.2775	26.2618	10.7729	5.67497
1220.9	176.878	90.6932	51.5403	26.4055	10.841	5.6778
1221.9	176.943	90.9016	51.8042	26.5483	10.9085	5.67987
1222.9	177.012	91.1125	52.069	26.6905	10.9758	5.68121
1223.9	177.086	91.3261	52.3344	26.8322	11.0427	5.68184
1224.9	177.163	91.5419	52.6004	26.9732	11.1094	5.68177
1226	177.245	91.76	52.8669	27.1137	11.1759	5.681
1227	177.331	91.9804	53.1339	27.2537	11.2421	5.67951
1228	177.421	92.2027	53.4013	27.3932	11.3082	5.67734
1229	177.516	92.4265	53.6687	27.5325	11.3742	5.67452
1230	177.616	92.6522	53.9363	27.6712	11.4401	5.671
1231	177.72	92.8806	54.2045	27.8093	11.5057	5.66671
1232.1	177.828	93.1119	54.4733	27.9466	11.5709	5.66163
1233.1	177.941	93.3467	54.743	28.083	11.6356	5.6557
1234.1	178.058	93.5848	55.0134	28.2186	11.6999	5.64894
1235.1	178.18	93.8254	55.2842	28.3536	11.764	5.64139
1236.1	178.307	94.069	55.5554	28.4877	11.8276	5.63303
1237.1	178.438	94.3158	55.8272	28.6211	11.8909	5.62382
1238.1	178.574	94.5653	56.0994	28.7537	11.9539	5.61384
1239.2	178.713	94.8174	56.3721	28.8857	12.0165	5.60316
1240.2	178.857	95.0716	56.6451	29.0171	12.0789	5.59184
1241.2	179.004	95.3274	56.9184	29.1481	12.1411	5.58
1242.2	179.155	95.5848	57.192	29.2786	12.203	5.56764
1243.2	179.308	95.8442	57.466	29.4085	12.2647	5.55472
1244.2	179.465	96.1053	57.7404	29.5381	12.3261	5.54135
1245.2	179.624	96.3678	58.0152	29.6671	12.3873	5.52758
1246.3	179.786	96.6316	58.2903	29.7958	12.4482	5.51342
1247.3	179.95	96.8963	58.5656	29.9243	12.509	5.49891
1248.3	180.117	97.1619	58.8409	30.0524	12.5696	5.48406
1249.4	180.287	97.4283	59.1162	30.1803	12.6302	5.46885
1250.4	180.459	97.6951	59.3914	30.3081	12.6907	5.45339
1251.4	180.632	97.9619	59.6665	30.4358	12.7511	5.43779
1252.4	180.808	98.2283	59.9414	30.5635	12.8116	5.42208
1253.5	180.985	98.4941	60.216	30.6913	12.8722	5.40634
1254.5	181.163	98.7594	60.4904	30.8192	12.9328	5.39054
1255.5	181.343	99.025	60.7647	30.9469	12.9933	5.37457
1256.5	181.525	99.2908	61.0389	31.0745	13.0537	5.35845
1257.6	181.708	99.5573	61.3133	31.2018	13.1139	5.34214
1258.6	181.892	99.8245	61.5877	31.3289	13.1739	5.32565
1259.6	182.078	100.092	61.862	31.4558	13.2338	5.30903
1260.6	182.265	100.36	62.1364	31.5824	13.2935	5.29223
1261.7	182.453	100.629	62.4108	31.7086	13.3529	5.27518
1262.7	182.643	100.899	62.6853	31.8345	13.4122	5.25801
1263.7	182.833	101.168	62.9597	31.9604	13.4713	5.24083
1264.8	183.023	101.438	63.2339	32.0862	13.5303	5.22373
1265.8	183.213	101.706	63.5079	32.2121	13.5893	5.20682
1266.8	183.403	101.973	63.7816	32.3381	13.6483	5.19009
1267.9	183.592	102.24	64.0553	32.4641	13.7071	5.17344
1268.9	183.781	102.507	64.3288	32.59	13.7658	5.15697
1269.9	183.968	102.773	64.6022	32.7159	13.8244	5.14073
1271	184.155	103.038	64.8753	32.8419	13.8829	5.12468
1272	184.342	103.302	65.1481	32.9679	13.9413	5.10882
1273	184.529	103.566	65.4205	33.094	13.9997	5.09309
1274.1	184.716	103.829	65.6925	33.22	14.058	5.07743
1275.1	184.903	104.092	65.964	33.346	14.1163	5.06188
1276.1	185.091	104.353	66.2348	33.4721	14.1746	5.04653
1277.1	185.278	104.614	66.505	33.5983	14.2329	5.03135
1278.2	185.466	104.873	66.7744	33.7247	14.2913	5.01632
1279.2	185.655	105.131	67.0431	33.8511	14.3498	5.00147
1280.2	185.844	105.388	67.311	33.9776	14.4082	4.98675
1281.3	186.033	105.644	67.5782	34.1042	14.4667	4.9722
1282.3	186.221	105.9	67.8448	34.2307	14.5251	4.95784
1283.3	186.41	106.154	68.1106	34.3573	14.5834	4.94363
1284.4	186.6	106.408	68.3756	34.4839	14.6418	4.92953
1285.4	186.791	106.661	68.6396	34.6105	14.7002	4.91554
1286.4	186.982	106.913	68.9028	34.737	14.7586	4.90161
1287.5	187.174	107.165	69.1649	34.8636	14.817	4.88785
1288.5	187.365	107.414	69.4261	34.9904	14.8755	4.8744
1289.5	187.556	107.662	69.6863	35.1174	14.934	4.86133
1290.6	187.745	107.908	69.9452	35.2448	14.9928	4.84874
1291.6	187.933	108.151	70.203	35.3726	15.0516	4.83667
1292.6	188.12	108.391	70.4597	35.5007	15.1107	4.82509
1293.6	188.304	108.629	70.7152	35.6293	15.1699	4.81414
1294.7	188.486	108.864	70.9694	35.7584	15.2293	4.80392
1295.7	188.665	109.096	71.2223	35.8881	15.2889	4.79438
1296.7	188.842	109.325	71.4739	36.0182	15.3487	4.78548
1297.8	189.018	109.551	71.7239	36.1489	15.4087	4.7772
1298.8	189.192	109.775	71.9725	36.28	15.469	4.76947
1299.8	189.364	109.995	72.2195	36.4116	15.5296	4.76238
1300.8	189.534	110.212	72.4649	36.5439	15.5904	4.75611
1301.8	189.701	110.424	72.7086	36.6768	15.6516	4.75063
1302.9	189.865	110.633	72.9505	36.8105	15.7131	4.74596
1303.9	190.027	110.839	73.1908	36.9447	15.7749	4.74206
1304.9	190.187	111.042	73.4296	37.0794	15.8369	4.73879
1305.9	190.346	111.242	73.6669	37.2144	15.8989	4.73614
1306.9	190.502	111.44	73.903	37.3497	15.9611	4.73407
1308	190.658	111.636	74.1377	37.4851	16.0232	4.73252
1309	190.812	111.83	74.3711	37.6207	16.0854	4.73145
1310	190.965	112.023	74.6033	37.7563	16.1475	4.73077
1311	191.118	112.215	74.8344	37.8917	16.2094	4.73037
1312	191.271	112.406	75.0644	38.027	16.2711	4.73031
1313	191.423	112.595	75.2931	38.1623	16.3328	4.7307
1314	191.573	112.783	75.5207	38.2976	16.3943	4.73156
1315	191.722	112.969	75.7469	38.4329	16.4558	4.73296
1316	191.87	113.154	75.9719	38.5682	16.5172	4.73482
1317.1	192.018	113.338	76.196	38.7032	16.5782	4.73696
1318.1	192.165	113.522	76.4191	38.8378	16.6389	4.73943
1319.1	192.312	113.706	76.6413	38.9721	16.6993	4.74221
1320.1	192.458	113.889	76.8626	39.1061	16.7594	4.74531
1321.2	192.603	114.071	77.0826	39.2399	16.8193	4.74878
1322.2	192.748	114.253	77.3015	39.3733	16.8789	4.75261
1323.2	192.892	114.434	77.5191	39.5065	16.9382	4.75675
1324.2	193.037	114.614	77.7354	39.6395	16.9973	4.76127
1325.3	193.18	114.793	77.9504	39.7722	17.0561	4.76618
1326.3	193.323	114.971	78.164	39.9047	17.1148	4.77151
1327.3	193.465	115.147	78.3761	40.0371	17.1733	4.77733
1328.3	193.607	115.323	78.5868	40.1693	17.2315	4.78353
1329.4	193.749	115.499	78.7962	40.301	17.2894	4.78999
1330.4	193.891	115.675	79.0046	40.4321	17.3469	4.79665
1331.4	194.034	115.851	79.2119	40.5625	17.4038	4.80344
1332.4	194.178	116.029	79.4183	40.6921	17.4602	4.81036
1333.4	194.322	116.206	79.6234	40.8212	17.5162	4.81746
1334.5	194.467	116.384	79.8274	40.9495	17.5716	4.82468
1335.5	194.613	116.564	80.0304	41.077	17.6265	4.83194
1336.5	194.76	116.743	80.2322	41.2038	17.6808	4.83938
1337.6	194.907	116.923	80.4327	41.3301	17.7348	4.84713
1338.6	195.054	117.102	80.6318	41.4559	17.7883	4.85529
1339.6	195.198	117.28	80.8292	41.5815	17.8416	4.86404
1340.6	195.342	117.457	81.025	41.7069	17.8946	4.87338
1341.6	195.484	117.632	81.2193	41.8319	17.9472	4.88323
1342.6	195.624	117.806	81.412	41.9567	17.9996	4.89374
1343.7	195.762	117.979	81.6029	42.0814	18.0517	4.90501
1344.7	195.897	118.149	81.792	42.2059	18.1036	4.91704
1345.7	196.03	118.318	81.9793	42.3304	18.1553	4.92984
1346.7	196.16	118.485	82.1647	42.4547	18.2067	4.94339
1347.7	196.288	118.649	82.3482	42.5789	18.2579	4.95767
1348.7	196.414	118.812	82.5298	42.703	18.3089	4.97279
1349.7	196.536	118.972	82.7091	42.8273	18.3598	4.98896
1350.7	196.654	119.128	82.8862	42.9518	18.4106	5.00621
1351.7	196.767	119.28	83.0609	43.0767	18.4615	5.02463
1352.8	196.877	119.43	83.2333	43.2017	18.5122	5.04412
1353.8	196.983	119.577	83.4037	43.3267	18.5628	5.0645
1354.8	197.087	119.722	83.5721	43.4515	18.613	5.08575
1355.8	197.188	119.865	83.7385	43.576	18.6629	5.10779
1356.9	197.287	120.008	83.9031	43.7002	18.7124	5.13058
1357.9	197.383	120.148	84.0657	43.8241	18.7615	5.15418
1359	197.477	120.288	84.2265	43.9475	18.8102	5.17846
1360	197.57	120.427	84.3857	44.0703	18.8583	5.20327
1361	197.661	120.565	84.5429	44.1925	18.9059	5.22877
1362.1	197.749	120.702	84.6982	44.3145	18.9531	5.25515
1363.1	197.834	120.837	84.8513	44.4362	19	5.28248
1364.1	197.914	120.968	85.002	44.558	19.0467	5.31094
1365.1	197.991	121.098	85.1505	44.6796	19.093	5.34045
1366.2	198.065	121.226	85.297	44.8008	19.1389	5.3708
1367.3	198.135	121.352	85.4414	44.9217	19.1844	5.40211
1368.3	198.202	121.476	85.5836	45.0424	19.2295	5.43441
1369.4	198.265	121.598	85.7238	45.1627	19.2742	5.46762
1370.4	198.325	121.719	85.8619	45.2828	19.3186	5.5017
1371.4	198.383	121.838	85.9982	45.4027	19.3628	5.53655
1372.4	198.439	121.956	86.1329	45.5222	19.4068	5.572
1373.4	198.494	122.072	86.2659	45.6415	19.4506	5.60811
1374.4	198.545	122.187	86.397	45.7606	19.4943	5.64496
1375.4	198.595	122.3	86.5265	45.8796	19.538	5.68247
1376.4	198.643	122.411	86.6545	45.9986	19.5818	5.7206
1377.4	198.689	122.52	86.7808	46.1174	19.6257	5.75932
1378.4	198.733	122.629	86.9058	46.236	19.6695	5.7985
1379.4	198.777	122.737	87.0294	46.3543	19.7132	5.83814
1380.4	198.82	122.843	87.1517	46.4723	19.7569	5.8782
1381.4	198.862	122.95	87.2728	46.5899	19.8005	5.9186
1382.4	198.904	123.056	87.3928	46.7072	19.8443	5.95923
1383.4	198.946	123.161	87.5119	46.8242	19.8881	6.00002
1384.4	198.99	123.267	87.6302	46.9407	19.932	6.04086
1385.4	199.033	123.373	87.7477	47.057	19.9761	6.08184
1386.5	199.076	123.478	87.864	47.173	20.0203	6.12312
1387.5	199.118	123.581	87.9792	47.2888	20.0648	6.16473
1388.5	199.159	123.684	88.0932	47.4046	20.1094	6.20677
1389.6	199.199	123.785	88.206	47.5204	20.1544	6.24922
1390.6	199.238	123.885	88.3178	47.636	20.1995	6.292
1391.6	199.276	123.984	88.4283	47.7515	20.2449	6.33521
1392.7	199.313	124.082	88.5376	47.867	20.2906	6.37894
1393.7	199.348	124.178	88.6457	47.9824	20.3366	6.42307
1394.8	199.383	124.273	88.7529	48.0979	20.383	6.46745
1395.8	199.417	124.366	88.8594	48.2133	20.4299	6.51201
1396.8	199.453	124.46	88.9653	48.3287	20.4773	6.55659
1397.9	199.488	124.553	89.0706	48.444	20.5253	6.60123
1398.9	199.523	124.644	89.175	48.5595	20.5739	6.64612
1400	199.558	124.734	89.2789	48.6751	20.6231	6.69114
1401	199.594	124.823	89.3821	48.7908	20.673	6.73626
1402.1	199.629	124.911	89.4847	48.9067	20.7236	6.7815
1403.1	199.665	124.998	89.5868	49.0224	20.7747	6.8268
1404.2	199.701	125.085	89.6882	49.1381	20.8263	6.87219
1405.2	199.736	125.172	89.7889	49.2535	20.8783	6.91773
1406.3	199.772	125.258	89.889	49.3688	20.9308	6.96334
1407.4	199.809	125.344	89.9886	49.4839	20.9837	7.00895
1408.4	199.846	125.43	90.0877	49.5987	21.0369	7.05454
1409.5	199.885	125.516	90.1864	49.713	21.0905	7.10006
1410.5	199.924	125.603	90.2846	49.827	21.1445	7.14554
1411.6	199.964	125.689	90.3822	49.9407	21.1988	7.19105
1412.6	200.004	125.776	90.4793	50.0542	21.2536	7.23659
1413.7	200.044	125.863	90.576	50.1674	21.3089	7.28215
1414.7	200.085	125.949	90.6721	50.2804	21.3646	7.32775
1415.8	200.126	126.036	90.7677	50.3929	21.4206	7.37336
1416.9	200.168	126.123	90.8627	50.5051	21.4769	7.41901
1417.9	200.209	126.211	90.9572	50.6167	21.5335	7.46473
1419	200.252	126.298	91.0512	50.728	21.5904	7.51042
1420.1	200.295	126.387	91.145	50.839	21.6478	7.55596
1421.2	200.34	126.476	91.2387	50.9495	21.7058	7.60127
1422.2	200.387	126.566	91.3325	51.0598	21.7644	7.64624
1423.3	200.436	126.657	91.4265	51.1697	21.8236	7.69086
1424.4	200.487	126.748	91.5205	51.2794	21.8835	7.73515
1425.5	200.54	126.841	91.6149	51.3888	21.9443	7.77901
1426.6	200.596	126.934	91.7097	51.498	22.0059	7.82234
1427.6	200.654	127.028	91.8049	51.607	22.0684	7.86518
1428.7	200.715	127.124	91.9005	51.7156	22.1316	7.90751
1429.8	200.779	127.221	91.9965	51.8238	22.1955	7.94935
1430.9	200.845	127.319	92.0928	51.9314	22.26	7.99073
1432.1	200.913	127.419	92.1896	52.0387	22.3251	8.03156
1433.2	200.986	127.521	92.2871	52.1455	22.3912	8.07171
1434.3	201.061	127.625	92.3852	52.2519	22.458	8.11117
1435.5	201.14	127.73	92.4842	52.3578	22.5256	8.14989
1436.6	201.223	127.838	92.5838	52.4632	22.594	8.18797
1437.7	201.307	127.946	92.6837	52.5684	22.6632	8.22561
1438.8	201.394	128.056	92.7839	52.6732	22.7332	8.26284
1439.9	201.482	128.166	92.8843	52.7778	22.804	8.29979
1441.1	201.571	128.277	92.9847	52.8822	22.8757	8.3365
1442.2	201.661	128.388	93.0852	52.9863	22.9481	8.37299
1443.3	201.752	128.499	93.1854	53.0903	23.0213	8.40942
1444.4	201.842	128.61	93.2852	53.194	23.0951	8.44593
1445.5	201.932	128.721	93.3846	53.2976	23.1698	8.48247
1446.7	202.022	128.832	93.4839	53.4011	23.2453	8.51892
1447.8	202.113	128.943	93.5831	53.5045	23.3216	8.55528
1448.9	202.204	129.054	93.6822	53.6078	23.3989	8.59147
1450.1	202.296	129.165	93.7812	53.711	23.4772	8.62762
1451.2	202.386	129.275	93.8796	53.8142	23.5563	8.66397
1452.3	202.475	129.384	93.9775	53.9175	23.6363	8.70051
1453.5	202.563	129.492	94.0748	54.021	23.7174	8.73727
1454.6	202.65	129.599	94.1716	54.1245	23.7993	8.77425
1455.8	202.736	129.705	94.268	54.228	23.8822	8.81132
1456.9	202.821	129.811	94.364	54.3314	23.966	8.8485
1458	202.906	129.917	94.4596	54.4347	24.0506	8.88581
1459.1	202.989	130.022	94.5548	54.5379	24.1361	8.92321
1460.3	203.073	130.127	94.6497	54.6411	24.2225	8.96068
1461.4	203.155	130.232	94.7444	54.7441	24.3098	8.99816
1462.6	203.238	130.337	94.8389	54.8469	24.398	9.03557
1463.7	203.32	130.442	94.9332	54.9496	24.4871	9.07305
1464.8	203.4	130.546	95.0268	55.0523	24.577	9.11082
1466	203.478	130.649	95.1197	55.155	24.6679	9.14894
1467.1	203.554	130.75	95.2116	55.2578	24.7597	9.18757
1468.2	203.626	130.85	95.3025	55.3607	24.8523	9.2267
1469.4	203.696	130.949	95.3927	55.4635	24.9459	9.26621
1470.5	203.764	131.047	95.482	55.5664	25.0402	9.30622
1471.6	203.828	131.143	95.5702	55.6694	25.1355	9.34682
1472.8	203.889	131.238	95.6575	55.7724	25.2316	9.38786
1473.9	203.949	131.331	95.7443	55.8754	25.3287	9.42921
1475	204.007	131.425	95.8307	55.9785	25.4269	9.47073
1476.2	204.064	131.518	95.917	56.0816	25.5263	9.51222
1477.3	204.121	131.61	96.0034	56.1846	25.6269	9.5537
1478.4	204.176	131.702	96.0895	56.2878	25.7286	9.59529
1479.5	204.231	131.794	96.1757	56.391	25.8316	9.63683
1480.6	204.286	131.886	96.2621	56.4944	25.936	9.6782
1481.7	204.34	131.978	96.3488	56.5978	26.0418	9.71943
1482.9	204.394	132.069	96.4358	56.7012	26.1489	9.76048
1484	204.449	132.161	96.523	56.8047	26.2573	9.80135
1485.1	204.503	132.253	96.6105	56.9081	26.367	9.8421
1486.2	204.557	132.345	96.6984	57.0116	26.4781	9.88258
1487.3	204.612	132.438	96.7872	57.1151	26.5907	9.92258
1488.4	204.669	132.532	96.8768	57.2185	26.7049	9.96204
1489.5	204.728	132.627	96.9676	57.3219	26.8206	10.0009
1490.6	204.788	132.723	97.0592	57.4254	26.9379	10.0392
1491.7	204.847	132.819	97.1514	57.5289	27.0566	10.0773
1492.8	204.907	132.915	97.2439	57.6325	27.1769	10.1152
1493.9	204.965	133.011	97.3367	57.7363	27.2987	10.153
1495	205.023	133.106	97.4297	57.8403	27.422	10.1908
1496.1	205.079	133.201	97.5229	57.9444	27.5468	10.2286
1497.2	205.134	133.295	97.6161	58.0488	27.6731	10.2664
1498.3	205.186	133.388	97.709	58.1534	27.8008	10.3045
1499.4	205.236	133.48	97.802	58.2582	27.9301	10.3427
1500.5	205.285	133.572	97.8952	58.3633	28.061	10.3808
1501.6	205.334	133.664	97.989	58.4687	28.1935	10.4188
1502.8	205.383	133.756	98.0837	58.5741	28.3279	10.4563
1503.9	205.431	133.848	98.1791	58.6799	28.4639	10.4936
1505	205.478	133.939	98.2747	58.7859	28.6017	10.5308
1506.1	205.524	134.03	98.3708	58.8922	28.7413	10.568
1507.3	205.569	134.121	98.4674	58.9988	28.8826	10.6049
1508.4	205.613	134.211	98.5645	59.1057	29.0257	10.6418
1509.5	205.657	134.301	98.6619	59.2127	29.1701	10.6784
1510.6	205.699	134.391	98.7596	59.3198	29.3159	10.7149
1511.7	205.741	134.48	98.8572	59.4268	29.4628	10.7514
1512.9	205.781	134.569	98.9548	59.5338	29.6107	10.7877
1514	205.822	134.657	99.0527	59.6407	29.7598	10.8238
1515.1	205.862	134.746	99.1507	59.7474	29.9097	10.8595
1516.3	205.903	134.835	99.2488	59.8538	30.0604	10.895
1517.4	205.944	134.924	99.3469	59.9599	30.2118	10.9301
1518.6	205.984	135.012	99.4448	60.0658	30.3639	10.9652
1519.8	206.023	135.1	99.5424	60.1715	30.5166	11.0002
1521	206.06	135.188	99.6396	60.277	30.67	11.0351
1522.1	206.097	135.274	99.7364	60.3822	30.8239	11.0699
1523.3	206.133	135.36	99.8326	60.4869	30.978	11.1047
1524.5	206.169	135.446	99.928	60.5912	31.1323	11.1394
1525.7	206.202	135.531	100.023	60.6949	31.2864	11.1742
1526.9	206.235	135.615	100.116	60.7982	31.4407	11.2089
1528	206.267	135.698	100.21	60.901	31.5951	11.2435
1529.2	206.3	135.782	100.303	61.0033	31.7498	11.2779
1530.5	206.332	135.865	100.395	61.1052	31.9047	11.3119
1531.7	206.364	135.948	100.488	61.2065	32.0599	11.3455
1533	206.397	136.031	100.58	61.3074	32.2152	11.379
1534.2	206.429	136.114	100.672	61.4077	32.3708	11.412
1535.4	206.462	136.197	100.763	61.5077	32.5268	11.4447
1536.6	206.495	136.28	100.855	61.6071	32.6829	11.4771
1537.9	206.529	136.363	100.946	61.7058	32.8389	11.509
1539.1	206.563	136.445	101.036	61.8037	32.9945	11.5406
1540.3	206.598	136.528	101.126	61.9008	33.1495	11.5719
1541.5	206.633	136.61	101.215	61.997	33.304	11.6028
1542.8	206.669	136.693	101.304	62.0923	33.458	11.6333
1544	206.706	136.775	101.391	62.1868	33.6115	11.6633
1545.2	206.744	136.858	101.479	62.2802	33.7643	11.6927
1546.4	206.783	136.941	101.566	62.3727	33.9165	11.7217
1547.6	206.823	137.024	101.651	62.4644	34.068	11.7504
1548.8	206.862	137.106	101.737	62.5552	34.2192	11.7788
1550.1	206.902	137.188	101.821	62.6454	34.37	11.8069
1551.4	206.941	137.269	101.905	62.7349	34.5204	11.8347
1552.6	206.979	137.35	101.988	62.8236	34.6702	11.8624
1553.8	207.016	137.43	102.069	62.9116	34.8196	11.8899
1555	207.053	137.508	102.15	62.9989	34.9684	11.9174
1556.2	207.088	137.586	102.23	63.0854	35.1168	11.9448
1557.4	207.122	137.663	102.308	63.1713	35.2647	11.972
1558.6	207.155	137.739	102.386	63.2564	35.4121	11.999
1559.8	207.189	137.814	102.463	63.3408	35.559	12.0257
1561	207.221	137.889	102.539	63.4245	35.7053	12.0522
1562.2	207.251	137.962	102.614	63.5075	35.8513	12.0787
1563.4	207.281	138.034	102.688	63.59	35.997	12.1051
1564.7	207.308	138.105	102.761	63.6719	36.1424	12.1314
1565.9	207.334	138.174	102.833	63.7531	36.2873	12.1577
1567.2	207.36	138.243	102.904	63.8336	36.4314	12.1838
1568.4	207.384	138.31	102.974	63.9131	36.5745	12.2097
1569.7	207.407	138.376	103.042	63.9916	36.7165	12.2356
1570.9	207.429	138.442	103.108	64.0691	36.8571	12.2613
1572.1	207.45	138.506	103.173	64.1455	36.9965	12.2868
1573.3	207.47	138.568	103.237	64.2208	37.1343	12.3122
1574.5	207.491	138.63	103.299	64.2947	37.2703	12.3373
1575.8	207.511	138.691	103.359	64.3674	37.4047	12.3622
1577	207.529	138.751	103.417	64.439	37.5376	12.3871
1578.2	207.546	138.809	103.474	64.5095	37.6689	12.4118
1579.4	207.562	138.865	103.529	64.579	37.7989	12.4366
1580.6	207.575	138.92	103.582	64.6474	37.9273	12.4614
1581.9	207.588	138.974	103.633	64.7146	38.0538	12.4861
1583.1	207.599	139.025	103.682	64.7804	38.1784	12.5108
1584.3	207.608	139.075	103.728	64.8451	38.3011	12.5355
1585.5	207.616	139.123	103.773	64.9085	38.4219	12.5601
1586.7	207.622	139.17	103.816	64.9707	38.5412	12.5846
1588	207.628	139.216	103.858	65.0319	38.659	12.6089
1589.3	207.633	139.261	103.898	65.0918	38.7753	12.6328
1590.6	207.638	139.304	103.937	65.1507	38.8903	12.6564
1591.9	207.641	139.347	103.975	65.2086	39.004	12.6797
1593.2	207.644	139.389	104.012	65.2654	39.1166	12.7027
1594.5	207.647	139.43	104.048	65.3214	39.2285	12.7252
1595.7	207.649	139.47	104.083	65.3765	39.3393	12.7473
1597	207.651	139.51	104.118	65.4305	39.449	12.7688
1598.3	207.652	139.549	104.151	65.4833	39.5574	12.79
1599.6	207.653	139.587	104.183	65.535	39.6644	12.8106
1600.9	207.655	139.624	104.215	65.5857	39.7702	12.8307
1602.1	207.657	139.661	104.246	65.6353	39.875	12.8502
1603.4	207.659	139.698	104.277	65.6838	39.9789	12.8689
1604.7	207.662	139.735	104.307	65.7313	40.0818	12.8869
1605.9	207.665	139.772	104.337	65.7778	40.1838	12.9042
1607.2	207.669	139.808	104.366	65.8232	40.2847	12.9208
1608.5	207.672	139.844	104.395	65.8677	40.3845	12.9369
1610	207.675	139.879	104.423	65.9111	40.4834	12.9524
1611.4	207.678	139.914	104.45	65.9536	40.5813	12.9673
1612.9	207.681	139.947	104.477	65.995	40.678	12.9816
1614.4	207.683	139.98	104.503	66.0354	40.7736	12.9953
1615.9	207.684	140.012	104.528	66.0748	40.8679	13.0086
1617.4	207.685	140.044	104.553	66.1131	40.9611	13.0213
1618.8	207.686	140.074	104.577	66.1506	41.0535	13.0333
1620.3	207.686	140.105	104.601	66.1871	41.1451	13.0446
1621.8	207.688	140.135	104.625	66.2227	41.2362	13.055
1623.2	207.69	140.165	104.649	66.2576	41.3267	13.0645
1624.7	207.691	140.195	104.673	66.2915	41.4165	13.0733
1626.2	207.693	140.224	104.698	66.3247	41.5058	13.0812
1627.6	207.694	140.254	104.722	66.357	41.5947	13.0884
1629.1	207.696	140.283	104.746	66.3886	41.6829	13.0947
1630.5	207.698	140.311	104.771	66.4191	41.7702	13.1001
1632	207.7	140.339	104.794	66.4485	41.8563	13.1048
1633.4	207.702	140.367	104.818	66.4767	41.9408	13.1088
1634.9	207.704	140.394	104.84	66.5037	42.0237	13.112
1636.3	207.707	140.42	104.862	66.5295	42.1052	13.1144
1637.7	207.71	140.446	104.883	66.5539	42.1849	13.116
1639.2	207.713	140.471	104.903	66.5769	42.2627	13.1168
1640.6	207.716	140.496	104.923	66.5985	42.3385	13.1168
1642	207.72	140.52	104.941	66.6187	42.4123	13.116
1643.5	207.723	140.543	104.959	66.6375	42.4842	13.1145
1644.9	207.727	140.565	104.975	66.655	42.5542	13.1122
1646.3	207.73	140.587	104.991	66.671	42.622	13.1092
1647.7	207.734	140.607	105.005	66.6854	42.6873	13.1055
1649.1	207.737	140.627	105.018	66.6981	42.7499	13.101
1650.5	207.74	140.645	105.029	66.7091	42.8096	13.096
1651.9	207.743	140.662	105.039	66.7184	42.8667	13.0902
1653.3	207.746	140.679	105.047	66.7262	42.9215	13.0835
1654.7	207.75	140.695	105.055	66.7325	42.9741	13.076
1656.1	207.754	140.71	105.062	66.7373	43.0247	13.0675
1657.5	207.759	140.725	105.069	66.7407	43.0732	13.058
1658.9	207.764	140.739	105.075	66.7426	43.1196	13.0476
1660.3	207.77	140.753	105.08	66.7431	43.1642	13.0361
1661.6	207.777	140.767	105.085	66.7423	43.2073	13.0235
1663	207.785	140.781	105.091	66.7402	43.2485	13.0097
1664.4	207.793	140.794	105.095	66.7365	43.2874	12.995
1665.7	207.802	140.806	105.099	66.7311	43.3239	12.9792
1667.1	207.812	140.818	105.101	66.724	43.3575	12.9625
1668.4	207.822	140.829	105.103	66.7152	43.3885	12.9447
1669.8	207.833	140.84	105.104	66.7048	43.4173	12.9258
1671.1	207.846	140.851	105.104	66.6928	43.4436	12.9058
1672.5	207.859	140.861	105.104	66.6791	43.4674	12.8846
1673.8	207.874	140.871	105.103	66.6638	43.4888	12.8623
1675.2	207.889	140.88	105.101	66.647	43.5079	12.8391
1676.5	207.904	140.889	105.099	66.6288	43.5251	12.8151
1677.8	207.92	140.898	105.096	66.6095	43.5406	12.7902
1679.2	207.936	140.906	105.093	66.589	43.5544	12.7646
1680.5	207.952	140.913	105.089	66.5673	43.5662	12.7383
1681.8	207.969	140.92	105.084	66.5444	43.5763	12.7115
1683.1	207.985	140.926	105.078	66.5205	43.5848	12.6842
1684.4	208.001	140.931	105.072	66.4955	43.5917	12.6564
1685.8	208.017	140.936	105.065	66.4697	43.5973	12.628
1687.2	208.034	140.941	105.058	66.443	43.6016	12.5991
1688.7	208.05	140.945	105.05	66.4153	43.6048	12.5696
1690.3	208.067	140.949	105.042	66.387	43.6069	12.5396
1691.9	208.083	140.953	105.034	66.358	43.6083	12.5093
1693.5	208.099	140.956	105.026	66.3285	43.6091	12.4787
1695	208.115	140.958	105.017	66.2987	43.6095	12.4478
1696.6	208.131	140.961	105.008	66.2684	43.6094	12.4167
1698.1	208.146	140.963	104.999	66.2375	43.6084	12.3852
1699.6	208.161	140.965	104.989	66.2059	43.6065	12.3535
1701.2	208.176	140.966	104.979	66.1736	43.6034	12.3215
1702.7	208.19	140.966	104.968	66.1406	43.5991	12.2893
1704.2	208.205	140.966	104.957	66.107	43.5939	12.2568
1705.7	208.219	140.966	104.944	66.0727	43.5875	12.2241
1707.2	208.233	140.965	104.932	66.0376	43.5797	12.191
1708.7	208.247	140.963	104.918	66.0018	43.5708	12.1578
1710.1	208.26	140.961	104.904	65.9655	43.5612	12.1246
1711.6	208.273	140.959	104.89	65.929	43.5509	12.0914
1713.1	208.285	140.956	104.875	65.8923	43.5405	12.0584
1714.5	208.296	140.952	104.859	65.8555	43.5298	12.0256
1716	208.307	140.948	104.843	65.8183	43.5183	11.9929
1717.4	208.316	140.943	104.826	65.7809	43.5064	11.9605
1718.9	208.325	140.938	104.808	65.7434	43.4942	11.9285
1720.3	208.333	140.932	104.79	65.7057	43.4815	11.8967
1721.7	208.34	140.925	104.771	65.6679	43.4685	11.865
1723.1	208.346	140.918	104.752	65.6298	43.4551	11.8334
1724.6	208.353	140.911	104.733	65.5915	43.4412	11.8018
1726	208.359	140.904	104.713	65.5529	43.4269	11.7701
1727.4	208.365	140.897	104.694	65.5143	43.4125	11.7385
1728.8	208.371	140.889	104.674	65.4755	43.3979	11.7069
1730.1	208.376	140.881	104.655	65.4367	43.3832	11.6751
1731.5	208.382	140.874	104.635	65.3977	43.3684	11.6433
1732.9	208.387	140.866	104.616	65.3586	43.3534	11.6115
1734.3	208.392	140.858	104.596	65.3194	43.338	11.5796
1735.6	208.397	140.85	104.577	65.28	43.3225	11.5478
1737	208.402	140.842	104.557	65.2405	43.3066	11.5159
1738.4	208.407	140.834	104.537	65.2008	43.2905	11.4839
1739.7	208.413	140.826	104.518	65.161	43.274	11.4516
1741	208.419	140.818	104.499	65.1209	43.2572	11.4191
1742.4	208.425	140.81	104.481	65.0807	43.2402	11.3864
1743.7	208.431	140.802	104.462	65.0406	43.2234	11.3538
1745	208.437	140.795	104.444	65.0008	43.2068	11.3214
1746.4	208.442	140.787	104.426	64.9613	43.1909	11.2893
1747.7	208.447	140.78	104.408	64.9223	43.1756	11.2575
1749	208.452	140.773	104.39	64.8836	43.1609	11.226
1750.3	208.456	140.765	104.373	64.8455	43.147	11.195
1751.6	208.459	140.758	104.356	64.8081	43.1341	11.1646
1752.9	208.462	140.751	104.339	64.7714	43.1223	11.1348
1754.2	208.464	140.744	104.323	64.7354	43.1114	11.1055
1755.5	208.466	140.737	104.307	64.6999	43.1014	11.0764
1757.2	208.468	140.73	104.292	64.665	43.0923	11.0477
1758.9	208.469	140.724	104.277	64.6307	43.0843	11.0192
1760.6	208.47	140.718	104.263	64.5973	43.0776	10.9914
1762.3	208.471	140.713	104.25	64.5648	43.0724	10.9641
1764	208.471	140.708	104.237	64.5332	43.0686	10.9373
1765.8	208.471	140.703	104.225	64.5025	43.0662	10.9111
1767.5	208.47	140.699	104.214	64.4724	43.0646	10.8852
1769.2	208.47	140.694	104.203	64.4428	43.0637	10.8598
1770.9	208.468	140.69	104.192	64.4138	43.0633	10.8349
1772.7	208.467	140.686	104.182	64.3852	43.0634	10.8103
1774.4	208.465	140.682	104.171	64.357	43.0637	10.786
1776.1	208.464	140.678	104.161	64.3291	43.064	10.7619
1777.8	208.463	140.674	104.151	64.3011	43.064	10.738
1779.6	208.461	140.67	104.141	64.2734	43.0637	10.7142
1781.3	208.46	140.666	104.132	64.2459	43.0635	10.6908
1783	208.458	140.662	104.122	64.2188	43.0633	10.6678
1784.7	208.456	140.658	104.112	64.1921	43.0634	10.6452
1786.4	208.453	140.654	104.102	64.1658	43.0635	10.623
1788.2	208.451	140.65	104.093	64.1394	43.0629	10.6011
1789.9	208.448	140.646	104.082	64.1132	43.0618	10.5795
1791.6	208.445	140.641	104.072	64.087	43.06	10.5583
1793.3	208.442	140.636	104.061	64.0609	43.0576	10.5374
1795.1	208.439	140.632	104.05	64.035	43.0549	10.5167
1796.8	208.436	140.627	104.04	64.0093	43.0517	10.4964
1798.5	208.434	140.622	104.029	63.9837	43.0482	10.4762
1800.2	208.431	140.617	104.018	63.9583	43.0442	10.4563
1801.9	208.429	140.612	104.008	63.9331	43.04	10.4367
1803.7	208.426	140.608	103.997	63.9082	43.0355	10.4174
1805.4	208.424	140.603	103.987	63.8837	43.0311	10.3984
1807.1	208.422	140.599	103.977	63.8594	43.0264	10.3796
1808.8	208.42	140.595	103.967	63.8352	43.0209	10.361
1810.6	208.419	140.59	103.957	63.8109	43.0144	10.3425
1812.3	208.418	140.586	103.947	63.7865	43.0066	10.3241
1814	208.417	140.581	103.936	63.7618	42.9975	10.3059
1815.7	208.417	140.577	103.925	63.737	42.9875	10.2877
1817.4	208.417	140.572	103.915	63.7121	42.9761	10.2695
1819.2	208.418	140.567	103.903	63.6869	42.9632	10.2513
1820.9	208.42	140.562	103.892	63.6615	42.9492	10.2332
1822.6	208.422	140.557	103.881	63.6363	42.9344	10.2154
1824.3	208.424	140.553	103.87	63.6113	42.919	10.1979
1826.1	208.426	140.548	103.858	63.5869	42.9036	10.1809
1827.8	208.428	140.543	103.847	63.563	42.8881	10.1645
1829.5	208.431	140.539	103.836	63.5395	42.8723	10.1486
1831.2	208.433	140.534	103.826	63.5166	42.8564	10.1333
1832.9	208.435	140.53	103.815	63.4945	42.8409	10.1187
1834.7	208.437	140.526	103.805	63.4732	42.8256	10.1049
1836.4	208.439	140.522	103.794	63.4527	42.8107	10.0919
1838.1	208.441	140.519	103.785	63.433	42.796	10.0795
1839.8	208.443	140.515	103.775	63.414	42.7815	10.0678
1841.6	208.445	140.512	103.766	63.396	42.7676	10.0569
1843.3	208.447	140.509	103.757	63.3792	42.7547	10.047
1845	208.448	140.507	103.749	63.3638	42.7429	10.0381
1846.7	208.45	140.505	103.742	63.3497	42.7325	10.0303
1848.4	208.451	140.503	103.735	63.3369	42.7232	10.0235
1850.2	208.452	140.502	103.728	63.3251	42.7144	10.0176
1851.9	208.452	140.501	103.722	63.3143	42.7059	10.0126
1853.6	208.453	140.5	103.716	63.3043	42.6976	10.0084
1855.3	208.454	140.5	103.71	63.2951	42.6892	10.005
1857.1	208.455	140.499	103.704	63.2868	42.681	10.0024
1858.8	208.457	140.499	103.699	63.2791	42.6724	10.0005
1860.5	208.458	140.498	103.693	63.2718	42.6632	9.99918
1862.2	208.46	140.498	103.688	63.2652	42.6536	9.99861
1863.9	208.462	140.498	103.682	63.2596	42.6442	9.99897
1865.7	208.464	140.499	103.677	63.255	42.6353	10.0003
1867.4	208.465	140.499	103.672	63.2518	42.6272	10.0029
1869.1	208.467	140.5	103.668	63.2498	42.6197	10.0065
1870.8	208.468	140.501	103.664	63.2488	42.6121	10.0111
1872.6	208.47	140.502	103.659	63.2488	42.6049	10.0167
1874.3	208.471	140.504	103.656	63.2499	42.598	10.0234
1876	208.472	140.505	103.652	63.2521	42.5913	10.0311
1877.7	208.474	140.507	103.648	63.2552	42.5849	10.0397
1879.4	208.475	140.509	103.645	63.2591	42.5788	10.0491
1881.2	208.476	140.512	103.642	63.2637	42.5725	10.0591
1882.9	208.478	140.514	103.639	63.2689	42.5663	10.0697
1884.6	208.479	140.517	103.636	63.275	42.5605	10.081
1886.3	208.481	140.519	103.634	63.2817	42.555	10.093
1888	208.482	140.522	103.632	63.2892	42.55	10.1055
1889.8	208.484	140.526	103.63	63.2972	42.5452	10.1185
1891.5	208.485	140.529	103.629	63.3057	42.5404	10.1319
1893.2	208.487	140.533	103.627	63.3145	42.5354	10.1457
1894.9	208.488	140.536	103.626	63.3238	42.5302	10.1598
1896.7	208.49	140.54	103.624	63.3333	42.5247	10.1743
1898.4	208.492	140.543	103.623	63.3428	42.519	10.1889
1900.1	208.494	140.547	103.622	63.3524	42.5128	10.2035
1901.8	208.497	140.551	103.621	63.3619	42.5059	10.218
1903.5	208.5	140.554	103.62	63.3713	42.4987	10.2326
1905.3	208.502	140.558	103.619	63.3809	42.4913	10.2474
1907	208.505	140.562	103.618	63.3908	42.4839	10.2624
1908.7	208.508	140.566	103.617	63.4011	42.4768	10.2777
1910.4	208.51	140.57	103.617	63.4118	42.4699	10.2933
1912.1	208.513	140.574	103.617	63.4228	42.4631	10.3091
1913.9	208.515	140.579	103.617	63.4341	42.4566	10.3253
1915.6	208.518	140.583	103.617	63.4461	42.4504	10.342
1917.3	208.52	140.587	103.618	63.4584	42.4446	10.3589
1919	208.522	140.592	103.618	63.4709	42.439	10.376
1920.8	208.524	140.597	103.619	63.4836	42.4335	10.3931
1922.5	208.526	140.602	103.62	63.496	42.4279	10.4099
1924.2	208.528	140.606	103.622	63.5084	42.4224	10.4267
1925.9	208.53	140.611	103.623	63.521	42.4172	10.4436
1927.6	208.531	140.616	103.625	63.5337	42.4124	10.4603
1929.4	208.533	140.621	103.627	63.5463	42.408	10.477
1931.1	208.534	140.626	103.629	63.559	42.4038	10.4936
1932.8	208.535	140.631	103.631	63.5716	42.3996	10.5101
1934.5	208.537	140.636	103.633	63.5842	42.3954	10.5265
1936.3	208.538	140.641	103.636	63.5969	42.3911	10.543
1938	208.539	140.646	103.638	63.6094	42.3865	10.5594
1939.7	208.54	140.651	103.641	63.6218	42.3817	10.5757
1941.4	208.541	140.656	103.643	63.634	42.3764	10.5918
1943.1	208.543	140.661	103.646	63.6459	42.3706	10.6078
1944.9	208.544	140.665	103.648	63.6576	42.3641	10.6237
1946.6	208.546	140.67	103.65	63.6692	42.3574	10.6394
1948.3	208.548	140.674	103.652	63.6806	42.3503	10.6551
1950	208.549	140.679	103.654	63.6919	42.343	10.6708
1951.7	208.551	140.683	103.657	63.7031	42.3354	10.6864
1953.5	208.553	140.687	103.658	63.7142	42.3273	10.7019
1955.2	208.555	140.691	103.66	63.7251	42.3186	10.7174
1956.9	208.557	140.695	103.662	63.7359	42.3093	10.733
1958.6	208.559	140.699	103.663	63.7465	42.2995	10.7485
1960.4	208.561	140.703	103.665	63.7568	42.2892	10.7637
1962.1	208.563	140.707	103.666	63.7666	42.2782	10.7786
1963.8	208.565	140.71	103.667	63.7757	42.2665	10.7931
1965.5	208.567	140.713	103.668	63.7842	42.2541	10.807
1967.2	208.57	140.716	103.668	63.7922	42.2411	10.8204
1968.9	208.572	140.719	103.669	63.7993	42.2274	10.8332
1970.7	208.575	140.721	103.669	63.8056	42.2131	10.8453
1972.4	208.577	140.723	103.669	63.8111	42.1982	10.8566
1974.1	208.58	140.725	103.669	63.8158	42.1823	10.8673
1975.8	208.582	140.726	103.668	63.8196	42.1655	10.8774
1977.5	208.585	140.728	103.667	63.8226	42.1477	10.8869
1979.3	208.588	140.728	103.666	63.8246	42.1287	10.8957
1981	208.591	140.729	103.664	63.8256	42.1088	10.9037
1982.7	208.594	140.729	103.662	63.8255	42.0876	10.9108
1984.4	208.597	140.729	103.66	63.8242	42.0653	10.917
1986.1	208.601	140.728	103.657	63.8219	42.0418	10.9224
1987.9	208.604	140.727	103.654	63.8188	42.0176	10.9271
1989.6	208.608	140.726	103.65	63.8151	41.9928	10.9314
1991.3	208.612	140.725	103.647	63.8108	41.9676	10.9352
1993	208.615	140.723	103.643	63.8061	41.9421	10.9387
1994.7	208.619	140.721	103.639	63.801	41.9162	10.9418
1996.4	208.623	140.72	103.635	63.7957	41.8901	10.9448
1998.2	208.626	140.718	103.632	63.7905	41.8641	10.9478
1999.9	208.63	140.716	103.628	63.7852	41.8381	10.9507
2001.6	208.634	140.714	103.624	63.7797	41.8121	10.9535
2003.3	208.637	140.712	103.62	63.774	41.7861	10.956
2005	208.641	140.71	103.616	63.768	41.76	10.9583
2006.7	208.645	140.708	103.612	63.7619	41.7341	10.9603
2008.5	208.648	140.706	103.609	63.756	41.7087	10.9625
2010.2	208.651	140.705	103.605	63.7503	41.6839	10.9648
2011.9	208.655	140.703	103.602	63.7449	41.6598	10.9672
2013.6	208.658	140.701	103.599	63.7398	41.6362	10.9697
2015.3	208.661	140.7	103.596	63.7347	41.613	10.9722
2017.1	208.664	140.698	103.593	63.7298	41.5902	10.9747
2018.8	208.667	140.696	103.59	63.725	41.5676	10.9773
2020.5	208.67	140.695	103.587	63.7203	41.5452	10.98
2022.2	208.673	140.693	103.584	63.7156	41.5232	10.9826
2023.9	208.676	140.692	103.582	63.7109	41.5013	10.9852
2025.6	208.679	140.69	103.579	63.706	41.4793	10.9877
2027.4	208.682	140.688	103.576	63.7012	41.4576	10.9902
2029.1	208.685	140.687	103.573	63.6968	41.4364	10.9929
2030.8	208.688	140.686	103.571	63.6929	41.416	10.9959
2032.5	208.69	140.684	103.569	63.6896	41.3966	10.9995
2034.2	208.693	140.683	103.567	63.6871	41.3781	11.0035
2035.9	208.696	140.683	103.565	63.685	41.3604	11.0079
2037.7	208.698	140.682	103.563	63.6837	41.3435	11.0128
2039.4	208.701	140.682	103.562	63.6831	41.3276	11.0183
2041.1	208.703	140.682	103.561	63.6832	41.3127	11.0243
2042.8	208.706	140.682	103.56	63.6837	41.2985	11.0305
2044.5	208.708	140.682	103.559	63.6845	41.2849	11.0369
2046.2	208.71	140.682	103.559	63.6852	41.2717	11.0431
2048	208.712	140.682	103.558	63.6859	41.2589	11.0493
2049.7	208.714	140.682	103.557	63.6868	41.2468	11.0555
2051.4	208.716	140.682	103.557	63.6876	41.2352	11.0615
2053.1	208.718	140.682	103.556	63.6882	41.2241	11.0673
2054.8	208.72	140.682	103.556	63.6886	41.2134	11.0728
2056.6	208.722	140.682	103.555	63.6888	41.2029	11.0781
2058.3	208.723	140.681	103.554	63.6887	41.1929	11.083
2060	208.725	140.681	103.554	63.6885	41.1832	11.0878
2061.7	208.726	140.681	103.553	63.6879	41.1737	11.0922
2063.4	208.727	140.68	103.552	63.6867	41.1643	11.096
2065.1	208.729	140.679	103.55	63.6848	41.1548	11.0991
2066.9	208.73	140.678	103.549	63.6819	41.1452	11.1014
2068.6	208.731	140.677	103.547	63.6785	41.1356	11.103
2070.3	208.732	140.675	103.545	63.6747	41.1264	11.1044
2072	208.733	140.674	103.544	63.6707	41.1177	11.1054
2073.7	208.734	140.672	103.542	63.6666	41.1098	11.1063
2075.4	208.734	140.67	103.54	63.6626	41.1027	11.107
2077.2	208.735	140.669	103.538	63.6585	41.0963	11.1076
2078.9	208.735	140.667	103.537	63.6546	41.0909	11.1083
2080.6	208.735	140.666	103.535	63.6513	41.0867	11.1092
2082.3	208.735	140.665	103.534	63.6481	41.0835	11.1101
2084	208.735	140.663	103.533	63.6449	41.0812	11.1109
2085.7	208.735	140.662	103.532	63.6415	41.0796	11.1114
2087.5	208.734	140.66	103.53	63.6376	41.0785	11.1113
2089.2	208.734	140.659	103.529	63.6334	41.078	11.1108
2090.9	208.733	140.657	103.528	63.6293	41.0787	11.1103
2092.6	208.732	140.655	103.526	63.6252	41.0802	11.1095
2094.3	208.73	140.654	103.525	63.6209	41.0828	11.1085
2096	208.729	140.652	103.524	63.6165	41.0862	11.1073
2097.8	208.727	140.65	103.523	63.612	41.0903	11.1058
2099.5	208.725	140.649	103.522	63.6075	41.0951	11.1041
2101.2	208.723	140.647	103.52	63.603	41.1005	11.1024
2102.9	208.721	140.645	103.519	63.5985	41.1065	11.1006
2104.6	208.719	140.644	103.518	63.5938	41.1129	11.0985
2106.4	208.717	140.642	103.517	63.5889	41.1196	11.0962
2108.1	208.715	140.64	103.516	63.5837	41.1263	11.0935
2109.8	208.713	140.638	103.515	63.5783	41.1332	11.0907
2111.5	208.711	140.636	103.514	63.573	41.1406	11.0878
2113.2	208.708	140.634	103.512	63.5677	41.1483	11.085
2114.9	208.706	140.632	103.511	63.5626	41.1567	11.0821
2116.7	208.703	140.63	103.511	63.5577	41.1654	11.0794
2118.4	208.701	140.629	103.51	63.5529	41.1744	11.0767
2120.1	208.699	140.627	103.509	63.5484	41.1836	11.0741
2121.8	208.696	140.625	103.508	63.5442	41.1932	11.0718
2123.5	208.694	140.624	103.508	63.5402	41.2029	11.0697
2125.2	208.692	140.622	103.507	63.5362	41.2128	11.0675
2127	208.689	140.621	103.507	63.5323	41.2229	11.0653
2128.7	208.687	140.62	103.506	63.5281	41.2329	11.0629
2130.4	208.685	140.618	103.506	63.5238	41.2429	11.0603
2132.1	208.682	140.617	103.505	63.5195	41.253	11.0577
2133.8	208.68	140.615	103.505	63.5149	41.2632	11.0548
2135.5	208.678	140.613	103.504	63.5102	41.2734	11.0517
2137.3	208.675	140.612	103.504	63.5052	41.2836	11.0484
2139	208.673	140.61	103.503	63.5001	41.2935	11.0449
2140.7	208.671	140.608	103.503	63.4949	41.3032	11.0413
2142.4	208.669	140.606	103.502	63.4896	41.3125	11.0377
2144.1	208.667	140.605	103.501	63.4842	41.3215	11.0341
2145.9	208.665	140.603	103.501	63.4785	41.3299	11.0301
2147.6	208.663	140.601	103.5	63.4726	41.3378	11.026
2149.3	208.661	140.599	103.499	63.4664	41.3451	11.0217
2151	208.66	140.597	103.498	63.4599	41.3518	11.0172
2152.7	208.659	140.595	103.497	63.4534	41.3583	11.0127
2154.4	208.657	140.593	103.497	63.4469	41.3646	11.0081
2156.2	208.656	140.591	103.496	63.4404	41.371	11.0036
2157.9	208.654	140.589	103.495	63.4341	41.3773	10.9991
2159.6	208.653	140.587	103.494	63.4279	41.3837	10.9947
2161.3	208.652	140.585	103.494	63.4219	41.3902	10.9906
2163	208.651	140.584	103.494	63.4164	41.397	10.9867
2164.7	208.65	140.582	103.494	63.4112	41.404	10.983
2166.5	208.649	140.581	103.494	63.4062	41.4112	10.9795
2168.2	208.647	140.579	103.494	63.4014	41.4185	10.9761
2169.9	208.646	140.578	103.494	63.3967	41.4259	10.9728
2171.6	208.645	140.577	103.494	63.3922	41.4334	10.9696
2173.3	208.644	140.576	103.495	63.3882	41.4414	10.9668
2175	208.643	140.575	103.495	63.3845	41.4499	10.9641
2176.8	208.642	140.575	103.496	63.3812	41.4589	10.9617
2178.5	208.641	140.574	103.497	63.3783	41.4683	10.9596
2180.2	208.64	140.574	103.498	63.3757	41.4779	10.9577
2181.9	208.639	140.574	103.5	63.3736	41.4877	10.9561
2183.6	208.638	140.573	103.501	63.3718	41.4974	10.9549
2185.3	208.637	140.574	103.503	63.3705	41.507	10.954
2187.1	208.636	140.574	103.505	63.3695	41.5166	10.9534
2188.8	208.635	140.574	103.507	63.3688	41.526	10.9531
2190.5	208.635	140.575	103.509	63.3685	41.5349	10.9532
2192.2	208.634	140.575	103.512	63.3685	41.5435	10.9535
2193.9	208.634	140.576	103.514	63.369	41.552	10.9543
2195.7	208.634	140.577	103.517	63.3701	41.5606	10.9556
2197.4	208.634	140.579	103.52	63.3719	41.5695	10.9574
2199.1	208.634	140.58	103.524	63.3743	41.5785	10.9597
2200.8	208.634	140.582	103.527	63.3773	41.5874	10.9626
2202.5	208.634	140.584	103.531	63.381	41.5962	10.966
2204.2	208.635	140.587	103.535	63.3854	41.6051	10.9701
2206	208.635	140.589	103.54	63.3904	41.6139	10.9747
2207.7	208.636	140.592	103.544	63.3959	41.6227	10.9797
2209.4	208.636	140.595	103.549	63.4018	41.6314	10.9851
2211.1	208.637	140.598	103.554	63.4079	41.64	10.9906
2212.8	208.638	140.601	103.559	63.4142	41.6485	10.9964
2214.5	208.639	140.604	103.564	63.4209	41.657	11.0024
2216.3	208.64	140.608	103.569	63.4277	41.6656	11.0085
2218	208.641	140.611	103.575	63.4345	41.6742	11.0146
2219.7	208.641	140.614	103.58	63.4415	41.6829	11.0208
2221.4	208.642	140.618	103.585	63.4485	41.6915	11.0271
2223.1	208.643	140.621	103.591	63.4555	41.6999	11.0334
2224.8	208.644	140.625	103.596	63.4627	41.7081	11.0398
2226.6	208.645	140.628	103.601	63.4698	41.716	11.0462
2228.3	208.646	140.631	103.606	63.4767	41.7238	11.0524
2230	208.647	140.635	103.612	63.4833	41.7314	11.0584
2231.7	208.649	140.638	103.617	63.4896	41.7386	11.0642
2233.4	208.65	140.641	103.621	63.4957	41.7455	11.0697
2235.1	208.651	140.644	103.626	63.5016	41.7523	11.0752
2236.9	208.652	140.647	103.631	63.5075	41.7591	11.0806
2238.6	208.653	140.65	103.636	63.5133	41.7659	11.0859
2240.3	208.654	140.653	103.64	63.5191	41.7727	11.0913
2242	208.655	140.656	103.645	63.5248	41.7795	11.0965
2243.7	208.656	140.659	103.65	63.5306	41.7863	11.1018
2245.5	208.657	140.662	103.654	63.5366	41.7933	11.1073
2247.2	208.658	140.665	103.659	63.5425	41.8002	11.1127
2248.9	208.658	140.668	103.664	63.5482	41.8073	11.118
2250.6	208.659	140.671	103.668	63.5537	41.8143	11.123
2252.3	208.66	140.674	103.672	63.5588	41.8214	11.1276
2254	208.661	140.676	103.676	63.5634	41.8285	11.132
2255.8	208.661	140.679	103.68	63.5679	41.8357	11.1361
2257.5	208.661	140.681	103.684	63.572	41.8431	11.1398
2259.2	208.662	140.683	103.688	63.5757	41.8506	11.1433
2260.9	208.662	140.685	103.691	63.5791	41.8583	11.1464
2262.6	208.662	140.687	103.694	63.5822	41.8659	11.1493
2264.3	208.662	140.689	103.697	63.585	41.8734	11.1521
2266.1	208.662	140.691	103.7	63.5879	41.8808	11.1548
2267.8	208.662	140.692	103.703	63.5905	41.888	11.1574
2269.5	208.662	140.694	103.706	63.593	41.8949	11.1598
2271.2	208.661	140.695	103.709	63.5952	41.9016	11.1622
2272.9	208.661	140.697	103.711	63.5973	41.9077	11.1645
2274.7	208.661	140.698	103.714	63.5993	41.9135	11.1667
2276.4	208.661	140.7	103.716	63.6012	41.9189	11.1689
2278.1	208.661	140.701	103.719	63.603	41.9241	11.1711
2279.8	208.661	140.702	103.721	63.6048	41.929	11.1733
2281.5	208.661	140.704	103.723	63.6065	41.9336	11.1755
2283.2	208.662	140.705	103.725	63.6083	41.9377	11.1779
2285	208.662	140.706	103.728	63.6102	41.9414	11.1805
2286.7	208.662	140.708	103.73	63.6123	41.9445	11.1833
2288.4	208.662	140.709	103.732	63.6145	41.9472	11.1862
2290.1	208.663	140.71	103.734	63.6166	41.9494	11.1892
2291.8	208.663	140.712	103.736	63.6185	41.9512	11.192
2293.5	208.663	140.713	103.738	63.6201	41.9525	11.1947
2295.3	208.664	140.714	103.739	63.6214	41.9534	11.1972
2297	208.664	140.715	103.741	63.6224	41.9539	11.1995
2298.7	208.664	140.715	103.742	63.623	41.954	11.2016
2300.4	208.664	140.716	103.743	63.6231	41.9538	11.2033
2302.1	208.664	140.716	103.743	63.6228	41.9532	11.2047
2303.8	208.664	140.716	103.744	63.6221	41.9521	11.2058
2305.6	208.664	140.717	103.744	63.6212	41.9503	11.2069
2307.3	208.665	140.717	103.744	63.6201	41.948	11.2079
2309	208.665	140.716	103.744	63.6187	41.9449	11.2088
2310.7	208.665	140.716	103.743	63.6169	41.9413	11.2094
2312.4	208.665	140.716	103.743	63.6147	41.9371	11.2098
2314.1	208.665	140.715	103.742	63.612	41.9321	11.2099
2315.9	208.665	140.714	103.741	63.609	41.9266	11.2098
2317.6	208.665	140.713	103.739	63.6057	41.9205	11.2096
2319.3	208.665	140.712	103.738	63.6022	41.914	11.2092
2321	208.666	140.711	103.736	63.5984	41.9072	11.2087
2322.7	208.666	140.71	103.734	63.5944	41.9002	11.2081
2324.5	208.666	140.708	103.733	63.5903	41.8927	11.2074
2326.2	208.666	140.707	103.731	63.5862	41.885	11.2067
2327.9	208.666	140.706	103.729	63.5821	41.8772	11.2061
2329.6	208.666	140.704	103.727	63.5781	41.8692	11.2055
2331.3	208.666	140.703	103.725	63.5739	41.861	11.2049
2333	208.666	140.701	103.723	63.5695	41.8527	11.2041
2334.8	208.666	140.7	103.72	63.565	41.8442	11.2032
2336.5	208.666	140.698	103.718	63.5603	41.8357	11.2022
2338.2	208.666	140.697	103.716	63.5556	41.8272	11.2012
2339.9	208.666	140.695	103.713	63.5509	41.8189	11.2001
2341.6	208.666	140.694	103.711	63.5461	41.8108	11.1989
2343.3	208.666	140.692	103.708	63.5413	41.8028	11.1977
2345.1	208.666	140.69	103.706	63.5365	41.7948	11.1964
2346.8	208.666	140.689	103.704	63.5317	41.7868	11.1952
2348.5	208.666	140.687	103.701	63.527	41.7788	11.194
2350.2	208.666	140.686	103.699	63.5224	41.7706	11.1929
2351.9	208.666	140.684	103.696	63.5178	41.7625	11.1918
2353.6	208.666	140.682	103.694	63.5132	41.7542	11.1908
2355.4	208.666	140.681	103.692	63.5087	41.7457	11.1898
2357.1	208.666	140.679	103.689	63.5043	41.7371	11.1889
2358.8	208.666	140.678	103.687	63.5	41.7286	11.1882
2360.5	208.666	140.677	103.685	63.4959	41.7202	11.1875
2362.2	208.666	140.676	103.683	63.4921	41.7121	11.1871
2363.9	208.667	140.674	103.681	63.4886	41.7043	11.1868
2365.7	208.667	140.674	103.679	63.4853	41.6965	11.1867
2367.4	208.667	140.673	103.677	63.4824	41.689	11.1868
2369.1	208.668	140.672	103.676	63.4799	41.6817	11.1873
2370.8	208.668	140.672	103.675	63.4777	41.6746	11.1879
2372.5	208.668	140.671	103.674	63.4757	41.6676	11.1887
2374.3	208.669	140.671	103.673	63.4738	41.6609	11.1895
2376	208.669	140.67	103.672	63.472	41.6541	11.1904
2377.7	208.67	140.67	103.67	63.4702	41.6475	11.1912
2379.4	208.67	140.67	103.669	63.4685	41.6411	11.1921
2381.1	208.671	140.669	103.668	63.4667	41.6348	11.1929
2382.8	208.671	140.669	103.667	63.4649	41.6287	11.1936
2384.6	208.671	140.669	103.666	63.463	41.6228	11.1942
2386.3	208.672	140.668	103.665	63.461	41.6169	11.1948
2388	208.672	140.668	103.664	63.459	41.6111	11.1952
2389.7	208.672	140.668	103.663	63.4571	41.6055	11.1957
2391.4	208.673	140.667	103.662	63.455	41.5999	11.1961
2393.1	208.673	140.667	103.661	63.4528	41.5943	11.1963
2394.9	208.673	140.666	103.66	63.4504	41.5887	11.1963
2396.6	208.674	140.666	103.658	63.4477	41.5831	11.1962
2398.3	208.674	140.665	103.657	63.4449	41.5775	11.1958
2400	208.674	140.664	103.655	63.442	41.5721	11.1953
2401.7	208.674	140.664	103.654	63.4391	41.5669	11.1948
2403.4	208.674	140.663	103.653	63.4362	41.5621	11.1942
2405.2	208.674	140.662	103.651	63.4333	41.5577	11.1935
2406.9	208.675	140.662	103.65	63.4305	41.5536	11.1929
2408.6	208.675	140.661	103.649	63.4279	41.5499	11.1923
2410.3	208.675	140.661	103.648	63.4255	41.5468	11.1917
2412	208.675	140.66	103.647	63.4232	41.5441	11.1912
2413.7	208.675	140.66	103.646	63.421	41.5419	11.1906
2415.5	208.675	140.66	103.645	63.4188	41.5401	11.19
2417.2	208.675	140.66	103.645	63.4164	41.5386	11.1891
2418.9	208.675	140.659	103.644	63.414	41.5376	11.1881
2420.6	208.675	140.659	103.643	63.4117	41.5371	11.187
2422.3	208.674	140.659	103.642	63.4094	41.5371	11.1859
2424.1	208.674	140.658	103.642	63.4071	41.5377	11.1846
2425.8	208.674	140.658	103.641	63.4048	41.5388	11.1833
2427.5	208.674	140.658	103.641	63.4025	41.5403	11.1818
2429.2	208.673	140.658	103.641	63.4002	41.5421	11.1803
2430.9	208.673	140.658	103.64	63.3981	41.5443	11.1788
2432.6	208.673	140.658	103.64	63.3959	41.5466	11.1773
2434.4	208.673	140.657	103.64	63.3938	41.5491	11.1757
[truncated: 546 more rows]

## Sheet: Sheet3
0.010556	0.0116802	0.00036054	8.99916e-05	0.000101246	0.000128579	5.13702e-06
0.029237	0.0116818	0.000377647	8.95674e-05	0.000102647	0.000132603	4.8899e-06
0.059665	0.0116832	0.000394883	8.91386e-05	0.000104055	0.000136657	4.64048e-06
0.10923	0.0116844	0.00041225	8.87049e-05	0.000105472	0.000140742	4.38875e-06
0.18997	0.0116853	0.000429748	8.82664e-05	0.000106896	0.000144855	4.13471e-06
0.32148	0.0116859	0.000447377	8.78231e-05	0.000108328	0.000148999	3.87835e-06
0.53569	0.0116863	0.000465138	8.73749e-05	0.000109768	0.000153173	3.61966e-06
0.8756	0.0116865	0.000483031	8.69219e-05	0.000111216	0.000157378	3.35862e-06
1.2453	0.0116864	0.000501058	8.6464e-05	0.000112672	0.000161612	3.09524e-06
1.615	0.0116861	0.000519217	8.60012e-05	0.000114135	0.000165877	2.82949e-06
1.9847	0.0116855	0.000537511	8.55334e-05	0.000115607	0.000170173	2.56135e-06
2.3552	0.0116847	0.00055594	8.50607e-05	0.000117087	0.0001745	2.29083e-06
2.7336	0.0116836	0.000574505	8.45829e-05	0.000118575	0.000178857	2.01791e-06
3.112	0.0116823	0.000593205	8.41002e-05	0.000120071	0.000183246	1.74257e-06
3.4904	0.0116807	0.000612042	8.36124e-05	0.000121576	0.000187665	1.46481e-06
3.8687	0.0116789	0.000631017	8.31196e-05	0.000123088	0.000192116	1.18462e-06
4.247	0.0116768	0.000650129	8.26216e-05	0.000124609	0.000196599	9.01975e-07
4.6254	0.0116744	0.000669379	8.21186e-05	0.000126138	0.000201113	6.1688e-07
5.0036	0.0116718	0.000688768	8.16105e-05	0.000127675	0.000205658	3.29325e-07
5.3819	0.0116689	0.000708295	8.10972e-05	0.000129221	0.000210236	3.92983e-08
5.7602	0.0116658	0.000727962	8.05787e-05	0.000130774	0.000214845	-2.53211e-07
6.1384	0.0116624	0.000747769	8.00551e-05	0.000132336	0.000219486	-5.48215e-07
6.5166	0.0116587	0.000767716	7.95262e-05	0.000133907	0.000224159	-8.45723e-07
6.8948	0.0116547	0.000787803	7.89921e-05	0.000135485	0.000228864	-1.14574e-06
7.273	0.0116505	0.000808032	7.84527e-05	0.000137072	0.000233601	-1.44828e-06
7.6511	0.011646	0.000828401	7.79081e-05	0.000138668	0.000238371	-1.75334e-06
8.0292	0.0116413	0.000848912	7.73582e-05	0.000140272	0.000243172	-2.06094e-06
8.4073	0.0116363	0.000869564	7.6803e-05	0.000141884	0.000248006	-2.37107e-06
8.7853	0.011631	0.000890358	7.62425e-05	0.000143504	0.000252872	-2.68374e-06
9.1643	0.0116254	0.000911293	7.56766e-05	0.000145133	0.000257771	-2.99895e-06
9.543	0.0116195	0.00093237	7.51054e-05	0.00014677	0.000262702	-3.3167e-06
9.9209	0.0116134	0.000953588	7.45289e-05	0.000148416	0.000267665	-3.63701e-06
10.299	0.011607	0.000974948	7.39469e-05	0.00015007	0.00027266	-3.95988e-06
10.677	0.0116004	0.000996451	7.33596e-05	0.000151732	0.000277688	-4.28531e-06
11.054	0.0115934	0.0010181	7.27669e-05	0.000153403	0.000282748	-4.61332e-06
11.433	0.0115862	0.00103988	7.21687e-05	0.000155082	0.000287841	-4.94391e-06
11.817	0.0115786	0.00106181	7.15651e-05	0.00015677	0.000292966	-5.27709e-06
12.201	0.0115709	0.00108389	7.0956e-05	0.000158466	0.000298124	-5.61287e-06
12.582	0.0115628	0.0011061	7.03414e-05	0.00016017	0.000303314	-5.95125e-06
12.961	0.0115544	0.00112846	6.97213e-05	0.000161883	0.000308538	-6.29224e-06
13.338	0.0115457	0.00115097	6.90957e-05	0.000163604	0.000313794	-6.63586e-06
13.716	0.0115368	0.00117361	6.84645e-05	0.000165333	0.000319082	-6.98209e-06
14.093	0.0115276	0.0011964	6.78277e-05	0.000167071	0.000324403	-7.33095e-06
14.461	0.011518	0.00121934	6.71854e-05	0.000168818	0.000329757	-7.68245e-06
14.829	0.0115082	0.00124241	6.65374e-05	0.000170572	0.000335144	-8.03658e-06
15.206	0.0114981	0.00126563	6.58838e-05	0.000172335	0.000340563	-8.39336e-06
15.583	0.0114877	0.001289	6.52246e-05	0.000174107	0.000346015	-8.75279e-06
15.96	0.011477	0.0013125	6.45597e-05	0.000175886	0.000351499	-9.11487e-06
16.337	0.011466	0.00133615	6.38891e-05	0.000177674	0.000357016	-9.47962e-06
16.715	0.0114547	0.00135995	6.32129e-05	0.00017947	0.000362566	-9.84703e-06
17.092	0.011443	0.00138388	6.25309e-05	0.000181275	0.000368148	-1.02171e-05
17.469	0.0114311	0.00140796	6.18432e-05	0.000183088	0.000373763	-1.05899e-05
17.846	0.0114189	0.00143219	6.11498e-05	0.000184909	0.000379411	-1.09653e-05
18.223	0.0114064	0.00145655	6.04506e-05	0.000186738	0.00038509	-1.13434e-05
18.603	0.0113936	0.00148106	5.97456e-05	0.000188576	0.000390803	-1.17241e-05
18.983	0.0113805	0.00150571	5.90349e-05	0.000190421	0.000396547	-1.21076e-05
19.363	0.011367	0.0015305	5.83184e-05	0.000192275	0.000402325	-1.24937e-05
19.737	0.0113533	0.00155544	5.75962e-05	0.000194138	0.000408134	-1.28825e-05
20.108	0.0113393	0.00158052	5.68681e-05	0.000196008	0.000413976	-1.3274e-05
20.489	0.0113249	0.00160574	5.61341e-05	0.000197887	0.00041985	-1.36682e-05
20.869	0.0113102	0.0016311	5.53944e-05	0.000199773	0.000425756	-1.40651e-05
21.249	0.0112953	0.0016566	5.46487e-05	0.000201668	0.000431695	-1.44647e-05
21.63	0.01128	0.00168225	5.38972e-05	0.000203571	0.000437666	-1.4867e-05
22.02	0.0112644	0.00170803	5.31398e-05	0.000205482	0.000443669	-1.52719e-05
22.406	0.0112485	0.00173396	5.23766e-05	0.000207402	0.000449704	-1.56796e-05
22.786	0.0112323	0.00176003	5.16074e-05	0.000209329	0.000455771	-1.609e-05
23.166	0.0112157	0.00178624	5.08323e-05	0.000211264	0.00046187	-1.65031e-05
23.549	0.0111989	0.00181259	5.00513e-05	0.000213208	0.000468001	-1.69189e-05
23.936	0.0111817	0.00183908	4.92644e-05	0.000215159	0.000474163	-1.73373e-05
24.322	0.0111642	0.00186571	4.84715e-05	0.000217119	0.000480358	-1.77585e-05
24.706	0.0111464	0.00189247	4.76727e-05	0.000219086	0.000486583	-1.81824e-05
25.089	0.0111283	0.00191938	4.6868e-05	0.000221061	0.00049284	-1.86089e-05
25.457	0.0111099	0.00194642	4.60573e-05	0.000223044	0.000499128	-1.90381e-05
25.827	0.0110912	0.0019736	4.52406e-05	0.000225035	0.000505447	-1.94701e-05
26.21	0.0110721	0.00200091	4.44179e-05	0.000227033	0.000511797	-1.99047e-05
26.594	0.0110527	0.00202837	4.35893e-05	0.000229039	0.000518178	-2.0342e-05
26.979	0.011033	0.00205595	4.27547e-05	0.000231053	0.000524589	-2.07819e-05
27.363	0.011013	0.00208367	4.19141e-05	0.000233075	0.000531031	-2.12245e-05
27.74	0.0109927	0.00211153	4.10676e-05	0.000235104	0.000537503	-2.16698e-05
28.115	0.010972	0.00213951	4.0215e-05	0.00023714	0.000544006	-2.21177e-05
28.493	0.010951	0.00216763	3.93565e-05	0.000239185	0.000550538	-2.25683e-05
28.869	0.0109297	0.00219588	3.84919e-05	0.000241236	0.0005571	-2.30215e-05
29.245	0.0109081	0.00222426	3.76214e-05	0.000243295	0.000563691	-2.34774e-05
29.618	0.0108862	0.00225278	3.67448e-05	0.000245362	0.000570313	-2.3936e-05
29.991	0.0108639	0.00228142	3.58622e-05	0.000247435	0.000576964	-2.43971e-05
30.379	0.0108413	0.00231019	3.49735e-05	0.000249516	0.000583644	-2.4861e-05
30.771	0.0108184	0.00233909	3.40788e-05	0.000251605	0.000590354	-2.53275e-05
31.159	0.0107952	0.00236813	3.3178e-05	0.000253701	0.000597093	-2.57966e-05
31.535	0.0107716	0.00239729	3.22712e-05	0.000255803	0.000603861	-2.62684e-05
31.91	0.0107477	0.00242658	3.13582e-05	0.000257914	0.000610658	-2.67428e-05
32.293	0.0107235	0.002456	3.04391e-05	0.000260031	0.000617484	-2.72199e-05
32.692	0.0106989	0.00248554	2.95139e-05	0.000262155	0.000624339	-2.76996e-05
33.092	0.0106741	0.00251521	2.85826e-05	0.000264287	0.000631223	-2.8182e-05
33.482	0.0106489	0.00254501	2.76451e-05	0.000266425	0.000638136	-2.86671e-05
33.884	0.0106233	0.00257494	2.67014e-05	0.000268571	0.000645077	-2.91548e-05
34.268	0.0105974	0.00260499	2.57516e-05	0.000270723	0.000652046	-2.96452e-05
34.656	0.0105712	0.00263517	2.47955e-05	0.000272883	0.000659044	-3.01382e-05
35.058	0.0105447	0.00266547	2.38333e-05	0.000275049	0.00066607	-3.06339e-05
35.46	0.0105178	0.0026959	2.28648e-05	0.000277223	0.000673124	-3.11322e-05
35.862	0.0104905	0.00272645	2.189e-05	0.000279403	0.000680206	-3.16332e-05
36.264	0.010463	0.00275713	2.09091e-05	0.00028159	0.000687316	-3.21369e-05
36.649	0.0104351	0.00278792	1.99219e-05	0.000283783	0.000694454	-3.26432e-05
37.033	0.0104068	0.00281885	1.89284e-05	0.000285984	0.00070162	-3.31522e-05
37.418	0.0103782	0.00284989	1.79286e-05	0.000288191	0.000708813	-3.36638e-05
37.818	0.0103493	0.00288105	1.69226e-05	0.000290404	0.000716034	-3.41781e-05
38.218	0.01032	0.00291234	1.59102e-05	0.000292625	0.000723282	-3.4695e-05
38.62	0.0102904	0.00294375	1.48916e-05	0.000294852	0.000730557	-3.52146e-05
39.021	0.0102604	0.00297528	1.38665e-05	0.000297085	0.00073786	-3.57369e-05
39.422	0.0102301	0.00300693	1.28351e-05	0.000299325	0.000745189	-3.62618e-05
39.823	0.0101994	0.0030387	1.17974e-05	0.000301572	0.000752547	-3.67894e-05
40.224	0.0101684	0.00307059	1.07532e-05	0.000303825	0.000759931	-3.73197e-05
40.625	0.010137	0.0031026	9.7026e-06	0.000306085	0.000767342	-3.78526e-05
41.026	0.0101053	0.00313473	8.64558e-06	0.000308351	0.00077478	-3.83883e-05
41.427	0.0100732	0.00316698	7.58213e-06	0.000310623	0.000782245	-3.89266e-05
41.824	0.0100407	0.00319935	6.51224e-06	0.000312902	0.000789736	-3.94676e-05
42.207	0.010008	0.00323184	5.43589e-06	0.000315187	0.000797254	-4.00112e-05
42.591	0.0099748	0.00326444	4.35308e-06	0.000317478	0.000804798	-4.05575e-05
42.991	0.00994128	0.00329716	3.26378e-06	0.000319775	0.000812368	-4.11065e-05
43.386	0.00990741	0.00332999	2.168e-06	0.000322079	0.000819964	-4.16581e-05
43.778	0.00987318	0.00336294	1.06572e-06	0.000324388	0.000827585	-4.22124e-05
44.149	0.00983859	0.003396	-4.30541e-08	0.000326704	0.000835232	-4.27694e-05
44.523	0.00980363	0.00342917	-1.15834e-06	0.000329025	0.000842904	-4.3329e-05
44.89	0.00976832	0.00346245	-2.28014e-06	0.000331352	0.000850601	-4.38912e-05
45.276	0.00973264	0.00349585	-3.40845e-06	0.000333685	0.000858322	-4.4456e-05
45.655	0.00969659	0.00352935	-4.54328e-06	0.000336024	0.000866068	-4.50235e-05
46.065	0.00966019	0.00356296	-5.68462e-06	0.000338368	0.000873838	-4.55936e-05
46.477	0.00962342	0.00359668	-6.83246e-06	0.000340717	0.000881632	-4.61662e-05
46.889	0.00958629	0.0036305	-7.98682e-06	0.000343072	0.000889449	-4.67415e-05
47.3	0.00954879	0.00366443	-9.14769e-06	0.000345433	0.00089729	-4.73193e-05
47.702	0.00951093	0.00369846	-1.03151e-05	0.000347798	0.000905153	-4.78997e-05
48.104	0.00947271	0.00373259	-1.1489e-05	0.000350169	0.000913039	-4.84827e-05
48.502	0.00943411	0.00376682	-1.26695e-05	0.000352545	0.000920948	-4.90682e-05
48.89	0.00939515	0.00380115	-1.38566e-05	0.000354926	0.000928879	-4.96563e-05
49.287	0.00935582	0.00383558	-1.50502e-05	0.000357312	0.000936833	-5.0247e-05
49.688	0.00931612	0.00387012	-1.62504e-05	0.000359703	0.000944808	-5.08403e-05
50.081	0.00927604	0.00390475	-1.74572e-05	0.000362099	0.000952806	-5.14361e-05
50.476	0.00923559	0.00393947	-1.86706e-05	0.0003645	0.000960825	-5.20344e-05
50.877	0.00919477	0.0039743	-1.98907e-05	0.000366905	0.000968865	-5.26353e-05
51.278	0.00915358	0.00400921	-2.11173e-05	0.000369315	0.000976926	-5.32387e-05
51.679	0.00911201	0.00404423	-2.23506e-05	0.000371729	0.000985008	-5.38447e-05
52.086	0.00907006	0.00407933	-2.35904e-05	0.000374148	0.000993111	-5.44531e-05
52.501	0.00902773	0.00411452	-2.4837e-05	0.000376572	0.00100123	-5.50641e-05
52.911	0.00898503	0.00414981	-2.60901e-05	0.000378999	0.00100938	-5.56776e-05
53.319	0.00894195	0.00418518	-2.73499e-05	0.000381431	0.00101754	-5.62936e-05
53.727	0.00889849	0.00422064	-2.86164e-05	0.000383867	0.00102572	-5.69121e-05
54.12	0.00885465	0.00425619	-2.98896e-05	0.000386307	0.00103392	-5.75331e-05
54.503	0.00881042	0.00429182	-3.11694e-05	0.000388751	0.00104214	-5.81566e-05
54.911	0.00876581	0.00432754	-3.24559e-05	0.000391199	0.00105038	-5.87826e-05
55.302	0.00872082	0.00436334	-3.37491e-05	0.000393651	0.00105864	-5.9411e-05
55.697	0.00867545	0.00439923	-3.50489e-05	0.000396107	0.00106691	-6.00419e-05
56.087	0.00862969	0.00443519	-3.63555e-05	0.000398566	0.0010752	-6.06752e-05
56.486	0.00858355	0.00447124	-3.76687e-05	0.000401029	0.00108351	-6.1311e-05
56.894	0.00853702	0.00450736	-3.89886e-05	0.000403495	0.00109184	-6.19492e-05
57.294	0.00849011	0.00454357	-4.03153e-05	0.000405965	0.00110019	-6.25898e-05
57.693	0.00844281	0.00457985	-4.16486e-05	0.000408438	0.00110855	-6.32329e-05
58.092	0.00839512	0.0046162	-4.29887e-05	0.000410915	0.00111693	-6.38784e-05
58.491	0.00834705	0.00465263	-4.43356e-05	0.000413394	0.00112532	-6.45264e-05
58.893	0.00829858	0.00468914	-4.56892e-05	0.000415877	0.00113373	-6.51767e-05
59.286	0.00824972	0.00472573	-4.70495e-05	0.000418364	0.00114216	-6.58295e-05
59.681	0.00820047	0.00476238	-4.84167e-05	0.000420853	0.0011506	-6.64847e-05
60.084	0.00815083	0.00479911	-4.97906e-05	0.000423345	0.00115906	-6.71423e-05
60.479	0.0081008	0.00483591	-5.11713e-05	0.000425841	0.00116754	-6.78023e-05
60.88	0.00805037	0.00487278	-5.25588e-05	0.000428339	0.00117603	-6.84648e-05
61.283	0.00799955	0.00490972	-5.39531e-05	0.00043084	0.00118453	-6.91295e-05
61.684	0.00794833	0.00494673	-5.53542e-05	0.000433344	0.00119305	-6.97967e-05
62.073	0.00789672	0.0049838	-5.6762e-05	0.000435851	0.00120159	-7.04663e-05
62.463	0.00784472	0.00502094	-5.81767e-05	0.00043836	0.00121014	-7.11381e-05
62.862	0.00779232	0.00505815	-5.95982e-05	0.000440871	0.0012187	-7.18124e-05
63.265	0.00773952	0.00509541	-6.10265e-05	0.000443385	0.00122728	-7.2489e-05
63.668	0.00768633	0.00513274	-6.24616e-05	0.000445901	0.00123586	-7.31679e-05
64.07	0.00763274	0.00517013	-6.39035e-05	0.00044842	0.00124447	-7.38491e-05
64.44	0.00757875	0.00520758	-6.53522e-05	0.000450941	0.00125308	-7.45327e-05
64.811	0.00752437	0.00524509	-6.68077e-05	0.000453463	0.00126171	-7.52185e-05
65.204	0.00746959	0.00528266	-6.82701e-05	0.000455988	0.00127035	-7.59067e-05
65.607	0.00741441	0.00532028	-6.97392e-05	0.000458515	0.001279	-7.65971e-05
66.009	0.00735884	0.00535795	-7.12152e-05	0.000461044	0.00128766	-7.72898e-05
66.405	0.00730287	0.00539568	-7.2698e-05	0.000463574	0.00129634	-7.79848e-05
66.803	0.0072465	0.00543346	-7.41876e-05	0.000466106	0.00130502	-7.8682e-05
67.205	0.00718974	0.00547129	-7.5684e-05	0.00046864	0.00131372	-7.93815e-05
67.592	0.00713257	0.00550918	-7.71873e-05	0.000471175	0.00132243	-8.00832e-05
67.96	0.007075	0.00554711	-7.86974e-05	0.000473712	0.00133114	-8.07871e-05
68.331	0.00701704	0.00558509	-8.02143e-05	0.00047625	0.00133987	-8.14933e-05
68.725	0.00695867	0.00562312	-8.17382e-05	0.00047879	0.00134861	-8.22017e-05
69.127	0.00689989	0.00566119	-8.32689e-05	0.000481331	0.00135736	-8.29124e-05
69.526	0.00684072	0.00569932	-8.48064e-05	0.000483873	0.00136611	-8.36253e-05
69.922	0.00678114	0.00573748	-8.63509e-05	0.000486416	0.00137488	-8.43403e-05
70.321	0.00672116	0.00577569	-8.79022e-05	0.000488961	0.00138365	-8.50576e-05
70.721	0.00666077	0.00581394	-8.94605e-05	0.000491506	0.00139244	-8.57771e-05
71.121	0.00659997	0.00585223	-9.10256e-05	0.000494053	0.00140123	-8.64987e-05
71.511	0.00653877	0.00589056	-9.25977e-05	0.0004966	0.00141003	-8.72226e-05
71.908	0.00647715	0.00592893	-9.41767e-05	0.000499147	0.00141884	-8.79486e-05
72.309	0.00641513	0.00596734	-9.57626e-05	0.000501696	0.00142765	-8.86768e-05
72.707	0.0063527	0.00600578	-9.73555e-05	0.000504245	0.00143647	-8.94071e-05
73.103	0.00628986	0.00604426	-9.89553e-05	0.000506795	0.0014453	-9.01396e-05
73.5	0.0062266	0.00608278	-0.000100562	0.000509345	0.00145414	-9.08743e-05
73.875	0.00616294	0.00612133	-0.000102176	0.000511895	0.00146298	-9.16111e-05
74.243	0.00609886	0.00615991	-0.000103796	0.000514446	0.00147183	-9.23501e-05
74.629	0.00603437	0.00619852	-0.000105424	0.000516997	0.00148069	-9.30912e-05
75.025	0.00596946	0.00623717	-0.000107059	0.000519548	0.00148955	-9.38344e-05
75.421	0.00590414	0.00627584	-0.0001087	0.0005221	0.00149842	-9.45797e-05
75.817	0.00583841	0.00631454	-0.000110349	0.000524651	0.00150729	-9.53272e-05
76.213	0.00577226	0.00635328	-0.000112005	0.000527203	0.00151617	-9.60768e-05
76.609	0.00570569	0.00639203	-0.000113667	0.000529755	0.00152505	-9.68285e-05
77.005	0.00563871	0.00643082	-0.000115337	0.000532306	0.00153394	-9.75823e-05
77.384	0.00557131	0.00646963	-0.000117014	0.000534857	0.00154283	-9.83382e-05
77.776	0.00550348	0.00650847	-0.000118698	0.000537408	0.00155173	-9.90962e-05
78.177	0.00543524	0.00654733	-0.000120389	0.000539959	0.00156063	-9.98563e-05
78.573	0.00536657	0.00658622	-0.000122087	0.00054251	0.00156954	-0.000100619
78.969	0.00529749	0.00662513	-0.000123792	0.00054506	0.00157845	-0.000101383
79.364	0.00522798	0.00666406	-0.000125504	0.00054761	0.00158737	-0.000102149
79.76	0.00515804	0.00670301	-0.000127223	0.000550159	0.00159628	-0.000102918
80.157	0.00508769	0.00674198	-0.000128949	0.000552708	0.00160521	-0.000103688
80.557	0.00501691	0.00678097	-0.000130683	0.000555255	0.00161413	-0.000104461
80.954	0.0049457	0.00681997	-0.000132424	0.000557802	0.00162306	-0.000105236
81.349	0.00487407	0.00685899	-0.000134171	0.000560349	0.00163199	-0.000106012
81.748	0.00480201	0.00689802	-0.000135926	0.000562894	0.00164092	-0.000106791
82.147	0.00472953	0.00693706	-0.000137688	0.000565437	0.00164985	-0.000107572
82.546	0.00465662	0.00697611	-0.000139457	0.00056798	0.00165878	-0.000108354
82.945	0.00458329	0.00701518	-0.000141233	0.000570521	0.00166771	-0.000109139
83.343	0.00450953	0.00705424	-0.000143016	0.000573061	0.00167665	-0.000109926
83.741	0.00443534	0.00709331	-0.000144807	0.000575599	0.00168558	-0.000110714
84.14	0.00436073	0.00713239	-0.000146604	0.000578136	0.00169451	-0.000111505
84.538	0.0042857	0.00717146	-0.000148408	0.000580671	0.00170345	-0.000112297
84.937	0.00421023	0.00721054	-0.00015022	0.000583203	0.00171238	-0.000113091
85.335	0.00413434	0.00724961	-0.000152039	0.000585734	0.0017213	-0.000113888
85.733	0.00405803	0.00728867	-0.000153864	0.000588263	0.00173023	-0.000114686
86.132	0.00398129	0.00732773	-0.000155697	0.000590789	0.00173915	-0.000115486
86.53	0.00390412	0.00736678	-0.000157537	0.000593312	0.00174807	-0.000116287
86.928	0.00382653	0.00740582	-0.000159384	0.000595834	0.00175699	-0.000117091
87.327	0.00374851	0.00744485	-0.000161238	0.000598352	0.0017659	-0.000117896
87.725	0.00367005	0.00748387	-0.000163099	0.000600868	0.00177481	-0.000118704
88.124	0.00359118	0.00752287	-0.000164967	0.000603381	0.00178371	-0.000119513
88.522	0.00351187	0.00756185	-0.000166843	0.000605891	0.00179261	-0.000120323
88.921	0.00343213	0.00760082	-0.000168725	0.000608397	0.0018015	-0.000121136
89.32	0.00335197	0.00763976	-0.000170614	0.000610901	0.00181039	-0.00012195
89.713	0.00327137	0.00767868	-0.000172511	0.000613401	0.00181926	-0.000122766
90.105	0.00319035	0.00771757	-0.000174414	0.000615897	0.00182813	-0.000123584
90.503	0.0031089	0.00775643	-0.000176325	0.000618389	0.001837	-0.000124403
90.902	0.00302702	0.00779526	-0.000178242	0.000620878	0.00184585	-0.000125224
91.301	0.00294472	0.00783406	-0.000180167	0.000623362	0.0018547	-0.000126046
91.7	0.00286198	0.00787282	-0.000182098	0.000625842	0.00186353	-0.00012687
92.099	0.00277881	0.00791154	-0.000184037	0.000628318	0.00187235	-0.000127696
92.498	0.00269522	0.00795022	-0.000185982	0.000630789	0.00188117	-0.000128523
92.897	0.00261119	0.00798886	-0.000187935	0.000633255	0.00188997	-0.000129352
93.297	0.00252674	0.00802746	-0.000189894	0.000635717	0.00189876	-0.000130182
93.696	0.00244186	0.00806601	-0.000191861	0.000638174	0.00190754	-0.000131014
94.096	0.00235655	0.00810451	-0.000193834	0.000640625	0.00191631	-0.000131848
94.495	0.00227081	0.00814297	-0.000195815	0.000643072	0.00192506	-0.000132682
94.895	0.00218464	0.00818137	-0.000197802	0.000645513	0.0019338	-0.000133519
95.287	0.00209804	0.00821971	-0.000199796	0.000647949	0.00194253	-0.000134356
95.676	0.00201102	0.00825801	-0.000201798	0.000650379	0.00195124	-0.000135195
96.082	0.00192356	0.00829624	-0.000203806	0.000652804	0.00195994	-0.000136036
96.501	0.00183568	0.00833442	-0.000205821	0.000655223	0.00196862	-0.000136878
96.909	0.00174736	0.00837253	-0.000207844	0.000657636	0.00197729	-0.000137721
97.326	0.00165862	0.00841059	-0.000209873	0.000660043	0.00198594	-0.000138566
97.747	0.00156945	0.00844858	-0.000211909	0.000662444	0.00199458	-0.000139412
98.168	0.00147984	0.0084865	-0.000213952	0.000664839	0.0020032	-0.00014026
98.59	0.00138981	0.00852436	-0.000216002	0.000667227	0.0020118	-0.000141108
98.999	0.00129935	0.00856215	-0.000218059	0.000669609	0.00202038	-0.000141958
99.406	0.00120845	0.00859986	-0.000220123	0.000671985	0.00202895	-0.00014281
99.815	0.00111713	0.0086375	-0.000222194	0.000674354	0.00203749	-0.000143662
100.22	0.00102538	0.00867507	-0.000224271	0.000676715	0.00204602	-0.000144516
100.64	0.000933208	0.00871255	-0.000226356	0.00067907	0.00205453	-0.000145371
101.06	0.000840603	0.00874995	-0.000228448	0.000681417	0.00206301	-0.000146227
101.46	0.000747571	0.00878726	-0.000230546	0.000683757	0.00207148	-0.000147085
101.87	0.000654112	0.00882448	-0.000232651	0.000686089	0.00207992	-0.000147943
102.28	0.000560227	0.00886162	-0.000234763	0.000688413	0.00208834	-0.000148803
102.68	0.000465914	0.00889866	-0.000236882	0.000690729	0.00209674	-0.000149663
103.08	0.000371177	0.00893561	-0.000239008	0.000693038	0.00210512	-0.000150525
103.48	0.000276014	0.00897246	-0.00024114	0.000695338	0.00211347	-0.000151388
103.89	0.000180427	0.00900922	-0.00024328	0.00069763	0.00212179	-0.000152252
104.29	8.44163e-05	0.00904587	-0.000245426	0.000699913	0.00213009	-0.000153117
104.69	-1.20186e-05	0.00908241	-0.000247579	0.000702188	0.00213837	-0.000153983
105.1	-0.000108877	0.00911885	-0.000249738	0.000704454	0.00214662	-0.000154849
105.5	-0.00020616	0.00915518	-0.000251905	0.000706711	0.00215484	-0.000155717
105.9	-0.000303866	0.0091914	-0.000254078	0.000708959	0.00216304	-0.000156586
106.3	-0.000401996	0.00922751	-0.000256258	0.000711197	0.0021712	-0.000157455
106.71	-0.000500551	0.0092635	-0.000258445	0.000713426	0.00217934	-0.000158326
107.11	-0.000599531	0.00929937	-0.000260638	0.000715646	0.00218745	-0.000159197
107.51	-0.000698936	0.00933513	-0.000262838	0.000717856	0.00219553	-0.000160069
107.92	-0.000798767	0.00937077	-0.000265045	0.000720057	0.00220359	-0.000160942
108.32	-0.000899023	0.00940628	-0.000267259	0.000722247	0.00221161	-0.000161816
108.72	-0.000999705	0.00944167	-0.000269479	0.000724428	0.0022196	-0.00016269
109.13	-0.00110081	0.00947693	-0.000271706	0.000726598	0.00222756	-0.000163566
109.53	-0.00120235	0.00951206	-0.00027394	0.000728758	0.00223549	-0.000164442
109.93	-0.00130431	0.00954706	-0.000276181	0.000730908	0.00224339	-0.000165319
110.35	-0.00140669	0.00958193	-0.000278428	0.000733047	0.00225125	-0.000166196
110.77	-0.00150951	0.00961666	-0.000280682	0.000735175	0.00225908	-0.000167075
111.19	-0.00161275	0.00965125	-0.000282943	0.000737292	0.00226688	-0.000167954
111.59	-0.00171643	0.0096857	-0.000285211	0.000739398	0.00227464	-0.000168834
111.98	-0.00182053	0.00972001	-0.000287485	0.000741493	0.00228237	-0.000169714
112.39	-0.00192506	0.00975418	-0.000289766	0.000743577	0.00229006	-0.000170595
112.79	-0.00203002	0.0097882	-0.000292054	0.000745649	0.00229772	-0.000171477
113.21	-0.00213542	0.00982207	-0.000294348	0.00074771	0.00230535	-0.000172359
113.63	-0.00224124	0.0098558	-0.00029665	0.000749759	0.00231293	-0.000173242
114.04	-0.00234749	0.00988937	-0.000298958	0.000751797	0.00232048	-0.000174125
114.44	-0.00245418	0.0099228	-0.000301272	0.000753822	0.002328	-0.000175009
114.85	-0.0025613	0.00995607	-0.000303594	0.000755836	0.00233547	-0.000175894
115.25	-0.00266886	0.00998918	-0.000305922	0.000757838	0.00234291	-0.000176779
115.66	-0.00277685	0.0100221	-0.000308257	0.000759827	0.00235031	-0.000177665
116.06	-0.00288528	0.0100549	-0.000310599	0.000761805	0.00235768	-0.000178552
116.47	-0.00299414	0.0100876	-0.000312948	0.00076377	0.002365	-0.000179439
116.87	-0.00310345	0.0101201	-0.000315303	0.000765722	0.00237229	-0.000180326
117.28	-0.00321319	0.0101524	-0.000317665	0.000767663	0.00237954	-0.000181214
117.69	-0.00332338	0.0101846	-0.000320035	0.00076959	0.00238674	-0.000182103
118.09	-0.00343401	0.0102166	-0.000322411	0.000771505	0.00239391	-0.000182992
118.49	-0.00354508	0.0102484	-0.000324793	0.000773408	0.00240104	-0.000183881
118.9	-0.00365659	0.0102801	-0.000327183	0.000775297	0.00240813	-0.000184771
119.31	-0.00376855	0.0103116	-0.00032958	0.000777173	0.00241518	-0.000185662
119.72	-0.00388096	0.0103429	-0.000331983	0.000779036	0.00242218	-0.000186553
120.12	-0.0039938	0.010374	-0.000334393	0.000780885	0.00242914	-0.000187445
120.53	-0.0041071	0.010405	-0.00033681	0.000782721	0.00243606	-0.000188336
120.94	-0.00422084	0.0104358	-0.000339234	0.000784543	0.00244294	-0.000189229
121.35	-0.00433502	0.0104664	-0.000341665	0.000786352	0.00244978	-0.000190121
121.75	-0.00444966	0.0104969	-0.000344102	0.000788146	0.00245656	-0.000191014
122.16	-0.00456474	0.0105271	-0.000346547	0.000789926	0.00246331	-0.000191908
122.56	-0.00468027	0.0105572	-0.000348998	0.000791693	0.00247001	-0.000192802
122.97	-0.00479624	0.010587	-0.000351456	0.000793444	0.00247666	-0.000193696
123.38	-0.00491267	0.0106167	-0.000353921	0.000795181	0.00248327	-0.00019459
123.78	-0.00502954	0.0106462	-0.000356393	0.000796904	0.00248983	-0.000195485
124.19	-0.00514686	0.0106755	-0.000358872	0.000798611	0.00249635	-0.00019638
124.6	-0.00526464	0.0107046	-0.000361357	0.000800304	0.00250281	-0.000197275
125	-0.00538286	0.0107335	-0.000363849	0.000801981	0.00250923	-0.00019817
125.41	-0.00550154	0.0107622	-0.000366349	0.000803643	0.0025156	-0.000199066
125.82	-0.00562067	0.0107906	-0.000368855	0.00080529	0.00252192	-0.000199962
126.23	-0.00574025	0.0108189	-0.000371368	0.000806921	0.00252819	-0.000200858
126.64	-0.0058603	0.010847	-0.000373887	0.000808537	0.00253442	-0.000201754
127.05	-0.0059808	0.0108749	-0.000376414	0.000810137	0.00254059	-0.00020265
127.46	-0.00610176	0.0109025	-0.000378948	0.000811721	0.00254671	-0.000203547
127.87	-0.00622318	0.01093	-0.000381488	0.000813289	0.00255278	-0.000204444
128.28	-0.00634506	0.0109572	-0.000384036	0.000814841	0.0025588	-0.000205341
128.69	-0.0064674	0.0109842	-0.00038659	0.000816377	0.00256477	-0.000206238
129.1	-0.00659021	0.011011	-0.000389151	0.000817896	0.00257069	-0.000207135
129.51	-0.00671348	0.0110376	-0.000391719	0.000819399	0.00257655	-0.000208033
129.92	-0.00683722	0.011064	-0.000394295	0.000820886	0.00258236	-0.00020893
130.33	-0.00696142	0.0110901	-0.000396877	0.000822355	0.00258812	-0.000209827
130.74	-0.00708609	0.011116	-0.000399466	0.000823807	0.00259382	-0.000210725
131.15	-0.00721123	0.0111417	-0.000402062	0.000825243	0.00259946	-0.000211623
131.56	-0.00733685	0.0111672	-0.000404665	0.000826661	0.00260506	-0.00021252
131.97	-0.00746293	0.0111924	-0.000407275	0.000828062	0.00261059	-0.000213418
132.38	-0.00758948	0.0112174	-0.000409892	0.000829445	0.00261608	-0.000214316
132.79	-0.00771651	0.0112422	-0.000412516	0.000830811	0.0026215	-0.000215214
133.2	-0.00784401	0.0112667	-0.000415147	0.000832159	0.00262687	-0.000216112
133.61	-0.00797199	0.011291	-0.000417785	0.00083349	0.00263218	-0.000217009
134.02	-0.00810043	0.011315	-0.00042043	0.000834802	0.00263743	-0.000217907
134.42	-0.00822936	0.0113388	-0.000423082	0.000836096	0.00264263	-0.000218805
134.83	-0.00835876	0.0113624	-0.000425741	0.000837372	0.00264777	-0.000219702
135.23	-0.00848865	0.0113857	-0.000428407	0.000838629	0.00265285	-0.0002206
135.64	-0.00861901	0.0114088	-0.00043108	0.000839869	0.00265787	-0.000221497
136.05	-0.00874985	0.0114316	-0.00043376	0.000841089	0.00266283	-0.000222395
136.45	-0.00888118	0.0114542	-0.000436447	0.000842291	0.00266773	-0.000223292
136.86	-0.00901299	0.0114765	-0.000439141	0.000843475	0.00267257	-0.000224189
137.27	-0.00914528	0.0114986	-0.000441843	0.000844639	0.00267735	-0.000225087
137.68	-0.00927806	0.0115204	-0.000444551	0.000845785	0.00268207	-0.000225984
138.09	-0.00941133	0.0115419	-0.000447267	0.000846911	0.00268672	-0.00022688
138.5	-0.00954508	0.0115632	-0.00044999	0.000848018	0.00269132	-0.000227777
138.92	-0.00967932	0.0115843	-0.000452719	0.000849106	0.00269585	-0.000228674
139.34	-0.00981405	0.0116051	-0.000455456	0.000850174	0.00270032	-0.00022957
139.76	-0.00994927	0.0116256	-0.0004582	0.000851222	0.00270473	-0.000230466
140.18	-0.010085	0.0116458	-0.000460951	0.000852251	0.00270907	-0.000231362
140.6	-0.0102212	0.0116658	-0.00046371	0.000853259	0.00271335	-0.000232258
141.03	-0.0103579	0.0116855	-0.000466475	0.000854248	0.00271756	-0.000233154
141.45	-0.010495	0.0117049	-0.000469247	0.000855216	0.00272171	-0.000234049
141.87	-0.0106327	0.0117241	-0.000472027	0.000856163	0.00272579	-0.000234944
142.29	-0.0107709	0.011743	-0.000474814	0.000857091	0.00272981	-0.000235839
142.71	-0.0109095	0.0117616	-0.000477607	0.000857997	0.00273376	-0.000236733
143.13	-0.0110487	0.0117799	-0.000480408	0.000858882	0.00273764	-0.000237627
143.55	-0.0111883	0.0117979	-0.000483216	0.000859747	0.00274145	-0.000238521
143.98	-0.0113285	0.0118157	-0.000486031	0.00086059	0.0027452	-0.000239414
144.4	-0.0114691	0.0118331	-0.000488854	0.000861412	0.00274887	-0.000240307
144.81	-0.0116102	0.0118503	-0.000491683	0.000862213	0.00275248	-0.0002412
145.22	-0.0117519	0.0118672	-0.00049452	0.000862992	0.00275602	-0.000242092
145.62	-0.011894	0.0118838	-0.000497363	0.000863749	0.00275948	-0.000242984
146.04	-0.0120366	0.0119	-0.000500214	0.000864485	0.00276288	-0.000243875
146.46	-0.0121797	0.011916	-0.000503072	0.000865199	0.00276621	-0.000244766
146.88	-0.0123234	0.0119317	-0.000505937	0.000865891	0.00276946	-0.000245656
147.31	-0.0124675	0.0119471	-0.00050881	0.000866561	0.00277264	-0.000246546
147.73	-0.0126122	0.0119622	-0.00051169	0.000867209	0.00277576	-0.000247436
148.15	-0.0127573	0.011977	-0.000514577	0.000867835	0.0027788	-0.000248325
148.57	-0.012903	0.0119915	-0.000517471	0.000868438	0.00278176	-0.000249214
148.99	-0.0130491	0.0120057	-0.000520372	0.000869018	0.00278466	-0.000250102
149.42	-0.0131958	0.0120196	-0.000523281	0.000869576	0.00278748	-0.00025099
149.83	-0.013343	0.0120332	-0.000526197	0.000870112	0.00279023	-0.000251877
150.25	-0.0134908	0.0120464	-0.000529121	0.000870624	0.0027929	-0.000252764
150.67	-0.013639	0.0120594	-0.000532052	0.000871114	0.0027955	-0.00025365
151.09	-0.0137878	0.0120721	-0.00053499	0.00087158	0.00279803	-0.000254536
151.51	-0.0139371	0.0120844	-0.000537935	0.000872024	0.00280048	-0.000255422
151.93	-0.0140869	0.0120964	-0.000540888	0.000872444	0.00280285	-0.000256306
152.35	-0.0142372	0.0121081	-0.000543849	0.000872841	0.00280515	-0.000257191
152.77	-0.0143881	0.0121195	-0.000546817	0.000873214	0.00280738	-0.000258075
153.19	-0.0145395	0.0121306	-0.000549792	0.000873564	0.00280952	-0.000258958
153.61	-0.0146914	0.0121413	-0.000552775	0.00087389	0.0028116	-0.000259841
154.03	-0.0148438	0.0121517	-0.000555765	0.000874193	0.00281359	-0.000260723
154.45	-0.0149968	0.0121618	-0.000558763	0.000874471	0.00281551	-0.000261605
154.87	-0.0151503	0.0121716	-0.000561768	0.000874726	0.00281735	-0.000262486
155.28	-0.0153044	0.0121811	-0.000564781	0.000874957	0.00281911	-0.000263367
155.71	-0.015459	0.0121902	-0.000567801	0.000875163	0.0028208	-0.000264247
156.13	-0.0156141	0.012199	-0.000570829	0.000875346	0.0028224	-0.000265126
156.55	-0.0157698	0.0122075	-0.000573865	0.000875504	0.00282393	-0.000266005
156.97	-0.015926	0.0122156	-0.000576908	0.000875638	0.00282538	-0.000266884
157.39	-0.0160828	0.0122234	-0.000579959	0.000875747	0.00282675	-0.000267761
157.8	-0.0162401	0.0122309	-0.000583017	0.000875832	0.00282804	-0.000268639
158.22	-0.016398	0.0122381	-0.000586084	0.000875892	0.00282925	-0.000269516
158.64	-0.0165564	0.0122449	-0.000589158	0.000875927	0.00283039	-0.000270392
159.05	-0.0167153	0.0122513	-0.000592239	0.000875937	0.00283144	-0.000271267
159.47	-0.0168749	0.0122575	-0.000595328	0.000875922	0.00283241	-0.000272142
159.88	-0.0170349	0.0122633	-0.000598425	0.000875882	0.00283329	-0.000273017
160.29	-0.0171956	0.0122687	-0.00060153	0.000875816	0.0028341	-0.00027389
160.7	-0.0173568	0.0122738	-0.000604643	0.000875725	0.00283482	-0.000274763
161.11	-0.0175185	0.0122786	-0.000607763	0.000875608	0.00283546	-0.000275636
161.52	-0.0176808	0.012283	-0.000610891	0.000875466	0.00283602	-0.000276507
161.93	-0.0178437	0.012287	-0.000614027	0.000875297	0.00283649	-0.000277378
162.34	-0.0180071	0.0122907	-0.00061717	0.000875102	0.00283688	-0.000278248
162.75	-0.0181711	0.0122941	-0.000620321	0.00087488	0.00283718	-0.000279118
163.16	-0.0183356	0.0122971	-0.00062348	0.000874632	0.0028374	-0.000279987
163.57	-0.0185008	0.0122997	-0.000626647	0.000874358	0.00283753	-0.000280855
163.98	-0.0186664	0.0123019	-0.000629821	0.000874056	0.00283757	-0.000281722
164.39	-0.0188326	0.0123038	-0.000633003	0.000873727	0.00283752	-0.000282588
164.81	-0.0189994	0.0123053	-0.000636193	0.000873371	0.00283739	-0.000283453
165.23	-0.0191668	0.0123064	-0.000639391	0.000872987	0.00283716	-0.000284318
165.63	-0.0193347	0.0123072	-0.000642596	0.000872576	0.00283685	-0.000285181
166.04	-0.0195032	0.0123076	-0.000645809	0.000872137	0.00283645	-0.000286044
166.45	-0.0196723	0.0123076	-0.00064903	0.00087167	0.00283595	-0.000286906
166.87	-0.0198419	0.0123072	-0.000652258	0.000871175	0.00283536	-0.000287767
167.26	-0.0200121	0.0123064	-0.000655495	0.000870652	0.00283469	-0.000288627
167.66	-0.0201829	0.0123053	-0.000658739	0.0008701	0.00283392	-0.000289486
168.07	-0.0203542	0.0123037	-0.000661991	0.000869519	0.00283305	-0.000290344
168.48	-0.0205262	0.0123018	-0.000665251	0.00086891	0.0028321	-0.000291201
168.9	-0.0206986	0.0122994	-0.000668518	0.000868272	0.00283104	-0.000292057
169.31	-0.0208717	0.0122967	-0.000671793	0.000867604	0.0028299	-0.000292911
169.72	-0.0210454	0.0122935	-0.000675076	0.000866907	0.00282865	-0.000293765
170.15	-0.0212196	0.01229	-0.000678367	0.00086618	0.00282731	-0.000294618
170.57	-0.0213944	0.012286	-0.000681666	0.000865423	0.00282587	-0.000295469
170.98	-0.0215697	0.0122817	-0.000684972	0.000864636	0.00282434	-0.000296319
171.39	-0.0217457	0.0122769	-0.000688286	0.000863819	0.0028227	-0.000297168
171.8	-0.0219222	0.0122717	-0.000691608	0.000862971	0.00282097	-0.000298016
172.22	-0.0220993	0.0122661	-0.000694937	0.000862093	0.00281913	-0.000298863
172.63	-0.022277	0.01226	-0.000698274	0.000861184	0.0028172	-0.000299708
173.05	-0.0224553	0.0122535	-0.000701619	0.000860243	0.00281516	-0.000300552
173.47	-0.0226341	0.0122466	-0.000704972	0.000859272	0.00281302	-0.000301395
173.89	-0.0228135	0.0122393	-0.000708332	0.000858269	0.00281078	-0.000302237
174.3	-0.0229935	0.0122315	-0.0007117	0.000857234	0.00280843	-0.000303077
174.72	-0.0231741	0.0122233	-0.000715076	0.000856167	0.00280598	-0.000303915
175.14	-0.0233553	0.0122146	-0.00071846	0.000855068	0.00280343	-0.000304753
175.56	-0.0235371	0.0122055	-0.000721851	0.000853937	0.00280076	-0.000305588
175.98	-0.0237194	0.012196	-0.00072525	0.000852774	0.002798	-0.000306423
176.39	-0.0239023	0.012186	-0.000728657	0.000851578	0.00279512	-0.000307256
176.81	-0.0240858	0.0121756	-0.000732071	0.000850349	0.00279214	-0.000308087
177.23	-0.0242699	0.0121647	-0.000735494	0.000849087	0.00278905	-0.000308917
177.65	-0.0244546	0.0121533	-0.000738924	0.000847792	0.00278586	-0.000309746
178.06	-0.0246399	0.0121415	-0.000742361	0.000846464	0.00278255	-0.000310572
178.48	-0.0248257	0.0121292	-0.000745807	0.000845102	0.00277913	-0.000311398
178.9	-0.0250122	0.0121164	-0.00074926	0.000843706	0.0027756	-0.000312221
179.32	-0.0251992	0.0121032	-0.00075272	0.000842276	0.00277196	-0.000313043
179.73	-0.0253868	0.0120895	-0.000756189	0.000840811	0.0027682	-0.000313863
180.15	-0.025575	0.0120753	-0.000759664	0.000839312	0.00276433	-0.000314682
180.57	-0.0257638	0.0120607	-0.000763148	0.000837777	0.00276034	-0.000315498
180.99	-0.0259532	0.0120455	-0.000766639	0.000836208	0.00275624	-0.000316313
181.4	-0.0261431	0.0120298	-0.000770138	0.000834603	0.00275202	-0.000317126
181.82	-0.0263337	0.0120137	-0.000773644	0.000832962	0.00274768	-0.000317937
182.23	-0.0265248	0.011997	-0.000777158	0.000831285	0.00274323	-0.000318746
182.64	-0.0267165	0.0119799	-0.000780679	0.000829572	0.00273865	-0.000319553
183.06	-0.0269088	0.0119622	-0.000784208	0.000827822	0.00273395	-0.000320358
183.48	-0.0271016	0.011944	-0.000787744	0.000826035	0.00272913	-0.000321161
183.89	-0.0272951	0.0119253	-0.000791287	0.000824212	0.00272419	-0.000321962
184.31	-0.0274891	0.0119061	-0.000794838	0.000822351	0.00271912	-0.000322761
184.73	-0.0276837	0.0118864	-0.000798397	0.000820452	0.00271393	-0.000323558
185.15	-0.0278789	0.0118661	-0.000801963	0.000818516	0.00270862	-0.000324352
185.56	-0.0280747	0.0118453	-0.000805536	0.000816541	0.00270318	-0.000325144
185.98	-0.028271	0.011824	-0.000809116	0.000814529	0.00269761	-0.000325934
186.39	-0.028468	0.0118021	-0.000812705	0.000812478	0.00269191	-0.000326722
186.81	-0.0286655	0.0117797	-0.0008163	0.000810389	0.00268609	-0.000327507
187.22	-0.0288636	0.0117567	-0.000819903	0.00080826	0.00268014	-0.000328291
187.64	-0.0290623	0.0117332	-0.000823513	0.000806093	0.00267405	-0.000329071
188.05	-0.0292616	0.0117092	-0.000827131	0.000803886	0.00266784	-0.00032985
188.46	-0.0294615	0.0116846	-0.000830756	0.00080164	0.0026615	-0.000330626
188.87	-0.0296619	0.0116594	-0.000834389	0.000799355	0.00265502	-0.0003314
189.28	-0.029863	0.0116337	-0.000838029	0.000797029	0.00264841	-0.000332171
189.69	-0.0300646	0.0116074	-0.000841676	0.000794663	0.00264167	-0.00033294
190.1	-0.0302669	0.0115805	-0.000845331	0.000792257	0.0026348	-0.000333706
190.52	-0.0304697	0.0115531	-0.000848993	0.000789811	0.00262779	-0.00033447
190.92	-0.0306731	0.0115251	-0.000852663	0.000787323	0.00262064	-0.000335231
191.33	-0.0308772	0.0114966	-0.00085634	0.000784795	0.00261336	-0.00033599
191.74	-0.0310818	0.0114674	-0.000860024	0.000782226	0.00260594	-0.000336746
192.16	-0.031287	0.0114377	-0.000863716	0.000779616	0.00259839	-0.0003375
192.57	-0.0314928	0.0114074	-0.000867415	0.000776963	0.0025907	-0.000338251
192.97	-0.0316992	0.0113765	-0.000871122	0.00077427	0.00258286	-0.000338999
193.38	-0.0319063	0.0113451	-0.000874836	0.000771534	0.00257489	-0.000339745
193.78	-0.0321139	0.011313	-0.000878558	0.000768756	0.00256678	-0.000340488
194.19	-0.0323221	0.0112803	-0.000882287	0.000765936	0.00255853	-0.000341229
194.59	-0.0325309	0.0112471	-0.000886023	0.000763073	0.00255014	-0.000341966
195	-0.0327404	0.0112132	-0.000889767	0.000760168	0.0025416	-0.000342701
195.42	-0.0329504	0.0111788	-0.000893519	0.00075722	0.00253292	-0.000343434
195.83	-0.0331611	0.0111437	-0.000897278	0.00075423	0.00252411	-0.000344163
196.24	-0.0333723	0.0111081	-0.000901044	0.000751196	0.00251514	-0.00034489
196.64	-0.0335842	0.0110718	-0.000904818	0.00074812	0.00250604	-0.000345614
197.04	-0.0337967	0.011035	-0.0009086	0.000745	0.00249679	-0.000346335
197.44	-0.0340098	0.0109975	-0.000912389	0.000741836	0.0024874	-0.000347054
197.85	-0.0342236	0.0109594	-0.000916186	0.000738629	0.00247786	-0.00034777
198.25	-0.034438	0.0109207	-0.00091999	0.000735378	0.00246817	-0.000348483
198.65	-0.0346529	0.0108814	-0.000923802	0.000732082	0.00245834	-0.000349193
199.06	-0.0348685	0.0108414	-0.000927622	0.000728742	0.00244836	-0.0003499
199.46	-0.0350848	0.0108009	-0.000931449	0.000725358	0.00243823	-0.000350604
199.87	-0.0353016	0.0107597	-0.000935283	0.000721928	0.00242795	-0.000351305
200.27	-0.0355191	0.0107178	-0.000939125	0.000718453	0.00241753	-0.000352004
200.67	-0.0357372	0.0106753	-0.000942975	0.000714933	0.00240695	-0.000352699
201.07	-0.0359559	0.0106322	-0.000946832	0.000711367	0.00239621	-0.000353391
201.48	-0.0361753	0.0105884	-0.000950697	0.000707756	0.00238533	-0.00035408
201.88	-0.0363952	0.010544	-0.000954569	0.000704098	0.00237429	-0.000354766
202.28	-0.0366158	0.0104989	-0.000958449	0.000700393	0.00236309	-0.000355449
202.68	-0.036837	0.0104532	-0.000962336	0.000696641	0.00235174	-0.000356129
203.09	-0.0370589	0.0104068	-0.00096623	0.000692842	0.00234023	-0.000356805
203.49	-0.0372813	0.0103597	-0.000970132	0.000688996	0.00232857	-0.000357478
203.89	-0.0375044	0.010312	-0.000974041	0.000685102	0.00231674	-0.000358148
204.3	-0.0377281	0.0102636	-0.000977958	0.00068116	0.00230475	-0.000358814
204.7	-0.0379525	0.0102145	-0.000981882	0.00067717	0.00229261	-0.000359477
205.1	-0.0381774	0.0101647	-0.000985814	0.000673132	0.0022803	-0.000360137
205.5	-0.038403	0.0101142	-0.000989752	0.000669045	0.00226783	-0.000360793
205.9	-0.0386293	0.0100631	-0.000993699	0.00066491	0.0022552	-0.000361446
206.3	-0.0388561	0.0100112	-0.000997653	0.000660725	0.0022424	-0.000362096
206.7	-0.0390836	0.00995869	-0.00100161	0.000656492	0.00222944	-0.000362741
207.1	-0.0393117	0.00990546	-0.00100558	0.000652209	0.00221632	-0.000363384
207.51	-0.0395405	0.00985153	-0.00100956	0.000647876	0.00220302	-0.000364023
207.91	-0.0397699	0.00979689	-0.00101354	0.000643493	0.00218957	-0.000364658
208.31	-0.0399999	0.00974154	-0.00101753	0.000639061	0.00217594	-0.00036529
208.71	-0.0402306	0.00968548	-0.00102153	0.000634577	0.00216215	-0.000365918
209.11	-0.0404619	0.0096287	-0.00102554	0.000630043	0.00214818	-0.000366542
209.51	-0.0406939	0.0095712	-0.00102955	0.000625458	0.00213405	-0.000367163
209.9	-0.0409265	0.00951298	-0.00103357	0.000620822	0.00211974	-0.00036778
210.3	-0.0411597	0.00945403	-0.0010376	0.000616134	0.00210526	-0.000368393
210.71	-0.0413936	0.00939435	-0.00104163	0.000611395	0.00209061	-0.000369003
211.11	-0.0416281	0.00933395	-0.00104568	0.000606604	0.00207579	-0.000369609
211.51	-0.0418632	0.00927281	-0.00104973	0.000601761	0.00206079	-0.000370211
211.91	-0.042099	0.00921092	-0.00105379	0.000596866	0.00204562	-0.000370808
212.31	-0.0423354	0.0091483	-0.00105785	0.000591919	0.00203028	-0.000371403
212.71	-0.0425725	0.00908494	-0.00106192	0.000586919	0.00201476	-0.000371993
213.11	-0.0428102	0.00902082	-0.001066	0.000581867	0.00199906	-0.000372579
213.52	-0.0430485	0.00895596	-0.00107009	0.000576762	0.00198318	-0.000373161
213.92	-0.0432875	0.00889036	-0.00107418	0.000571604	0.00196713	-0.000373739
214.32	-0.0435271	0.008824	-0.00107828	0.000566393	0.0019509	-0.000374313
214.72	-0.0437673	0.00875688	-0.00108239	0.000561129	0.00193449	-0.000374883
215.12	-0.0440082	0.00868902	-0.00108651	0.000555812	0.00191791	-0.000375449
215.52	-0.0442497	0.0086204	-0.00109063	0.000550442	0.00190114	-0.000376011
215.92	-0.0444918	0.00855103	-0.00109476	0.000545019	0.0018842	-0.000376568
216.32	-0.0447346	0.00848091	-0.0010989	0.000539542	0.00186708	-0.000377122
216.73	-0.044978	0.00841002	-0.00110304	0.000534013	0.00184978	-0.000377671
217.13	-0.045222	0.00833837	-0.00110719	0.00052843	0.0018323	-0.000378216
217.53	-0.0454667	0.00826596	-0.00111135	0.000522793	0.00181464	-0.000378757
217.93	-0.0457119	0.00819279	-0.00111551	0.000517102	0.0017968	-0.000379293
218.36	-0.0459578	0.00811884	-0.00111969	0.000511358	0.00177878	-0.000379825
218.78	-0.0462043	0.00804413	-0.00112387	0.000505559	0.00176057	-0.000380353
219.2	-0.0464515	0.00796864	-0.00112805	0.000499706	0.00174219	-0.000380876
219.62	-0.0466992	0.00789238	-0.00113225	0.0004938	0.00172362	-0.000381395
220.04	-0.0469475	0.00781534	-0.00113645	0.000487838	0.00170486	-0.000381909
220.46	-0.0471965	0.00773753	-0.00114065	0.000481823	0.00168593	-0.000382418
220.87	-0.0474461	0.00765894	-0.00114487	0.000475753	0.00166681	-0.000382923
221.29	-0.0476962	0.00757957	-0.00114909	0.000469629	0.00164751	-0.000383424
221.72	-0.047947	0.00749942	-0.00115332	0.000463451	0.00162802	-0.000383919
222.14	-0.0481983	0.00741849	-0.00115755	0.000457218	0.00160835	-0.00038441
222.56	-0.0484503	0.00733677	-0.00116179	0.00045093	0.00158849	-0.000384897
222.97	-0.0487028	0.00725427	-0.00116604	0.000444588	0.00156845	-0.000385378
223.38	-0.0489559	0.00717098	-0.00117029	0.000438191	0.00154822	-0.000385854
223.8	-0.0492096	0.00708691	-0.00117455	0.000431739	0.00152781	-0.000386326
224.23	-0.0494639	0.00700205	-0.00117882	0.000425233	0.00150721	-0.000386792
224.65	-0.0497187	0.0069164	-0.00118309	0.000418672	0.00148642	-0.000387254
225.07	-0.0499741	0.00682996	-0.00118737	0.000412056	0.00146545	-0.000387711
225.49	-0.0502301	0.00674274	-0.00119165	0.000405386	0.0014443	-0.000388162
225.92	-0.0504867	0.00665473	-0.00119595	0.000398661	0.00142296	-0.000388609
226.34	-0.0507438	0.00656593	-0.00120024	0.000391882	0.00140143	-0.000389051
226.75	-0.0510015	0.00647634	-0.00120455	0.000385048	0.00137972	-0.000389487
227.16	-0.0512597	0.00638597	-0.00120886	0.00037816	0.00135782	-0.000389918
227.58	-0.0515185	0.0062948	-0.00121318	0.000371217	0.00133573	-0.000390344
227.99	-0.0517779	0.00620285	-0.0012175	0.000364219	0.00131346	-0.000390765
228.4	-0.0520378	0.0061101	-0.00122183	0.000357167	0.00129101	-0.000391181
228.81	-0.0522983	0.00601656	-0.00122616	0.00035006	0.00126836	-0.000391592
229.22	-0.0525593	0.00592223	-0.00123051	0.000342898	0.00124553	-0.000391997
229.64	-0.0528208	0.00582711	-0.00123485	0.000335682	0.00122251	-0.000392397
230.05	-0.053083	0.0057312	-0.00123921	0.000328411	0.00119931	-0.000392791
230.46	-0.0533456	0.0056345	-0.00124357	0.000321087	0.00117592	-0.000393181
230.87	-0.0536088	0.00553701	-0.00124793	0.000313708	0.00115235	-0.000393564
231.28	-0.0538725	0.00543873	-0.0012523	0.000306274	0.00112859	-0.000393943
231.69	-0.0541367	0.00533967	-0.00125668	0.000298787	0.00110465	-0.000394316
232.11	-0.0544015	0.00523983	-0.00126106	0.000291247	0.00108052	-0.000394683
232.53	-0.0546668	0.0051392	-0.00126545	0.000283652	0.00105621	-0.000395045
232.94	-0.0549326	0.00503779	-0.00126985	0.000276004	0.00103171	-0.000395401
233.35	-0.0551989	0.0049356	-0.00127425	0.000268303	0.00100703	-0.000395752
233.77	-0.0554657	0.00483264	-0.00127865	0.000260549	0.000982167	-0.000396097
234.18	-0.055733	0.00472889	-0.00128307	0.000252741	0.000957122	-0.000396436
234.6	-0.0560008	0.00462438	-0.00128748	0.000244881	0.000931895	-0.00039677
235.02	-0.056269	0.00451909	-0.00129191	0.000236968	0.000906487	-0.000397098
235.43	-0.0565378	0.00441304	-0.00129633	0.000229004	0.000880899	-0.00039742
235.85	-0.0568071	0.00430622	-0.00130077	0.000220987	0.000855131	-0.000397737
236.26	-0.0570768	0.00419864	-0.00130521	0.000212918	0.000829183	-0.000398048
236.67	-0.057347	0.00409029	-0.00130965	0.000204797	0.000803056	-0.000398353
237.08	-0.0576177	0.00398119	-0.0013141	0.000196625	0.00077675	-0.000398652
237.5	-0.0578889	0.00387132	-0.00131855	0.000188401	0.000750266	-0.000398945
237.91	-0.0581605	0.00376069	-0.00132301	0.000180126	0.000723603	-0.000399233
238.33	-0.0584325	0.0036493	-0.00132748	0.000171799	0.000696762	-0.000399514
238.74	-0.058705	0.00353715	-0.00133195	0.000163421	0.000669742	-0.000399789
239.15	-0.058978	0.00342425	-0.00133642	0.000154992	0.000642543	-0.000400059
239.56	-0.0592514	0.00331058	-0.0013409	0.000146511	0.000615167	-0.000400322
239.98	-0.0595253	0.00319615	-0.00134539	0.000137979	0.000587613	-0.000400579
240.39	-0.0597995	0.00308097	-0.00134988	0.000129397	0.000559881	-0.00040083
240.8	-0.0600742	0.00296503	-0.00135437	0.000120764	0.000531973	-0.000401075
241.21	-0.0603493	0.00284834	-0.00135887	0.00011208	0.000503886	-0.000401314
241.62	-0.0606249	0.00273089	-0.00136338	0.000103345	0.000475622	-0.000401546
242.03	-0.0609008	0.00261268	-0.00136788	9.45598e-05	0.000447181	-0.000401772
242.44	-0.0611771	0.00249371	-0.0013724	8.57239e-05	0.000418562	-0.000401991
242.85	-0.0614538	0.00237399	-0.00137691	7.68375e-05	0.000389766	-0.000402204
243.26	-0.0617309	0.00225351	-0.00138144	6.79007e-05	0.000360793	-0.00040241
243.67	-0.0620084	0.00213228	-0.00138596	5.89136e-05	0.000331643	-0.00040261
244.08	-0.0622863	0.00201029	-0.00139049	4.98763e-05	0.000302316	-0.000402804
244.49	-0.0625646	0.00188754	-0.00139503	4.07889e-05	0.000272813	-0.00040299
244.9	-0.0628432	0.00176405	-0.00139956	3.16517e-05	0.000243133	-0.00040317
245.31	-0.0631222	0.0016398	-0.00140411	2.24648e-05	0.000213279	-0.000403343
245.7	-0.0634015	0.00151481	-0.00140865	1.32283e-05	0.000183249	-0.00040351
246.08	-0.0636812	0.00138906	-0.0014132	3.94224e-06	0.000153043	-0.00040367
246.47	-0.0639613	0.00126257	-0.00141776	-5.39343e-06	0.000122662	-0.000403823
246.88	-0.0642417	0.00113532	-0.00142232	-1.47787e-05	9.21048e-05	-0.000403969
247.29	-0.0645224	0.00100732	-0.00142688	-2.42135e-05	6.1372e-05	-0.000404108
247.69	-0.0648034	0.000878573	-0.00143145	-3.36978e-05	3.04633e-05	-0.00040424
248.1	-0.0650848	0.000749069	-0.00143601	-4.32316e-05	-6.21384e-07	-0.000404365
248.51	-0.0653666	0.000618812	-0.00144059	-5.28149e-05	-3.18822e-05	-0.000404482
248.91	-0.0656486	0.0004878	-0.00144516	-6.24477e-05	-6.33192e-05	-0.000404593
249.32	-0.0659309	0.000356036	-0.00144974	-7.21298e-05	-9.49321e-05	-0.000404697
249.73	-0.0662136	0.00022352	-0.00145433	-8.1861e-05	-0.00012672	-0.000404793
250.13	-0.0664965	9.02569e-05	-0.00145891	-9.16411e-05	-0.000158683	-0.000404882
250.54	-0.0667798	-4.37544e-05	-0.0014635	-0.00010147	-0.000190821	-0.000404964
250.94	-0.0670633	-0.000178512	-0.0014681	-0.000111347	-0.000223132	-0.000405038
251.35	-0.0673471	-0.000314014	-0.00147269	-0.000121273	-0.000255618	-0.000405105
251.75	-0.0676312	-0.000450259	-0.00147729	-0.000131247	-0.000288276	-0.000405164
252.16	-0.0679155	-0.000587243	-0.00148189	-0.000141268	-0.000321107	-0.000405216
252.56	-0.0682001	-0.000724964	-0.0014865	-0.000151338	-0.00035411	-0.00040526
252.96	-0.0684849	-0.00086342	-0.00149111	-0.000161454	-0.000387284	-0.000405297
253.37	-0.06877	-0.00100261	-0.00149572	-0.000171618	-0.000420628	-0.000405326
253.77	-0.0690553	-0.00114252	-0.00150033	-0.000181828	-0.000454142	-0.000405347
254.17	-0.0693408	-0.00128316	-0.00150494	-0.000192085	-0.000487825	-0.00040536
254.57	-0.0696265	-0.00142452	-0.00150956	-0.000202387	-0.000521674	-0.000405366
254.98	-0.0699124	-0.00156658	-0.00151418	-0.000212735	-0.000555689	-0.000405364
255.37	-0.0701985	-0.00170936	-0.0015188	-0.000223128	-0.000589869	-0.000405353
255.76	-0.0704848	-0.00185285	-0.00152343	-0.000233566	-0.000624213	-0.000405335
256.15	-0.0707713	-0.00199703	-0.00152805	-0.000244048	-0.000658721	-0.000405309
256.55	-0.0710579	-0.00214192	-0.00153268	-0.000254575	-0.000693392	-0.000405275
256.95	-0.0713447	-0.00228752	-0.00153731	-0.000265145	-0.000728225	-0.000405233
257.35	-0.0716316	-0.0024338	-0.00154194	-0.000275759	-0.000763221	-0.000405182
257.75	-0.0719187	-0.00258079	-0.00154657	-0.000286418	-0.000798378	-0.000405123
258.15	-0.0722059	-0.00272847	-0.00155121	-0.000297119	-0.000833697	-0.000405056
258.55	-0.0724932	-0.00287685	-0.00155584	-0.000307864	-0.000869178	-0.000404981
258.95	-0.0727806	-0.00302592	-0.00156048	-0.000318652	-0.000904818	-0.000404897
259.35	-0.0730682	-0.00317567	-0.00156512	-0.000329483	-0.000940618	-0.000404805
259.75	-0.0733558	-0.00332611	-0.00156976	-0.000340356	-0.000976575	-0.000404704
260.15	-0.0736435	-0.00347723	-0.0015744	-0.00035127	-0.00101269	-0.000404595
260.54	-0.0739313	-0.00362902	-0.00157904	-0.000362226	-0.00104896	-0.000404477
260.94	-0.0742191	-0.00378149	-0.00158368	-0.000373224	-0.00108539	-0.00040435
261.34	-0.074507	-0.00393463	-0.00158832	-0.000384262	-0.00112197	-0.000404214
261.73	-0.0747949	-0.00408843	-0.00159297	-0.000395341	-0.00115871	-0.00040407
262.13	-0.0750829	-0.0042429	-0.00159761	-0.000406461	-0.0011956	-0.000403917
262.53	-0.0753708	-0.00439804	-0.00160225	-0.00041762	-0.00123264	-0.000403754
262.92	-0.0756588	-0.00455383	-0.0016069	-0.000428819	-0.00126984	-0.000403583
263.32	-0.0759468	-0.00471028	-0.00161154	-0.000440058	-0.00130719	-0.000403403
263.72	-0.0762348	-0.00486738	-0.00161619	-0.000451336	-0.00134468	-0.000403213
264.11	-0.0765227	-0.00502513	-0.00162083	-0.000462652	-0.00138233	-0.000403015
264.51	-0.0768106	-0.00518352	-0.00162548	-0.000474007	-0.00142012	-0.000402807
264.9	-0.0770985	-0.00534256	-0.00163012	-0.0004854	-0.00145807	-0.00040259
265.29	-0.0773864	-0.00550223	-0.00163476	-0.00049683	-0.00149616	-0.000402363
265.69	-0.0776742	-0.00566253	-0.00163941	-0.000508298	-0.00153439	-0.000402128
266.08	-0.0779619	-0.00582347	-0.00164405	-0.000519804	-0.00157277	-0.000401883
266.48	-0.0782496	-0.00598504	-0.00164869	-0.000531346	-0.0016113	-0.000401628
266.87	-0.0785372	-0.00614725	-0.00165333	-0.000542925	-0.00164997	-0.000401364
267.26	-0.0788247	-0.00631008	-0.00165797	-0.000554541	-0.00168879	-0.00040109
267.65	-0.0791122	-0.00647354	-0.00166261	-0.000566194	-0.00172775	-0.000400807
268.05	-0.0793995	-0.00663762	-0.00166725	-0.000577883	-0.00176685	-0.000400514
268.44	-0.0796867	-0.00680233	-0.00167189	-0.000589608	-0.0018061	-0.000400212
268.83	-0.0799739	-0.00696766	-0.00167652	-0.000601369	-0.00184549	-0.000399899
269.22	-0.0802609	-0.0071336	-0.00168116	-0.000613165	-0.00188502	-0.000399577
269.61	-0.0805478	-0.00730015	-0.00168579	-0.000624996	-0.00192469	-0.000399245
270	-0.0808345	-0.0074673	-0.00169043	-0.000636862	-0.0019645	-0.000398903
270.39	-0.0811211	-0.00763506	-0.00169506	-0.000648762	-0.00200445	-0.000398552
270.78	-0.0814076	-0.00780342	-0.00169969	-0.000660696	-0.00204453	-0.00039819
271.17	-0.0816938	-0.00797237	-0.00170432	-0.000672663	-0.00208475	-0.000397818
271.56	-0.0819799	-0.00814191	-0.00170894	-0.000684663	-0.0021251	-0.000397436
271.95	-0.0822658	-0.00831204	-0.00171357	-0.000696696	-0.00216559	-0.000397044
272.34	-0.0825516	-0.00848275	-0.00171819	-0.000708762	-0.00220621	-0.000396642
272.73	-0.0828371	-0.00865404	-0.00172281	-0.000720859	-0.00224696	-0.000396229
273.12	-0.0831224	-0.00882591	-0.00172743	-0.000732989	-0.00228785	-0.000395806
273.51	-0.0834075	-0.00899834	-0.00173205	-0.00074515	-0.00232886	-0.000395374
273.9	-0.0836924	-0.00917134	-0.00173666	-0.000757341	-0.00237001	-0.00039493
274.28	-0.0839771	-0.00934489	-0.00174127	-0.000769563	-0.00241128	-0.000394477
274.67	-0.0842615	-0.00951901	-0.00174588	-0.000781815	-0.00245267	-0.000394013
275.06	-0.0845457	-0.00969367	-0.00175049	-0.000794097	-0.00249419	-0.000393538
275.44	-0.0848296	-0.00986889	-0.0017551	-0.000806409	-0.00253584	-0.000393053
275.83	-0.0851133	-0.0100447	-0.0017597	-0.000818749	-0.00257761	-0.000392558
276.22	-0.0853967	-0.010221	-0.0017643	-0.000831119	-0.00261951	-0.000392052
276.6	-0.0856798	-0.0103978	-0.0017689	-0.000843517	-0.00266152	-0.000391535
276.99	-0.0859627	-0.0105752	-0.00177349	-0.000855944	-0.00270367	-0.000391008
277.37	-0.0862452	-0.0107531	-0.00177808	-0.000868399	-0.00274593	-0.00039047
277.76	-0.0865275	-0.0109316	-0.00178267	-0.000880882	-0.00278831	-0.000389921
278.14	-0.0868094	-0.0111106	-0.00178726	-0.000893393	-0.00283081	-0.000389361
278.53	-0.087091	-0.0112901	-0.00179184	-0.000905931	-0.00287344	-0.000388791
278.91	-0.0873723	-0.0114701	-0.00179642	-0.000918496	-0.00291618	-0.000388209
279.3	-0.0876532	-0.0116507	-0.00180099	-0.000931087	-0.00295903	-0.000387616
279.68	-0.0879338	-0.0118318	-0.00180556	-0.000943705	-0.00300201	-0.000387012
280.06	-0.088214	-0.0120134	-0.00181013	-0.000956348	-0.0030451	-0.000386398
280.45	-0.0884938	-0.0121955	-0.00181469	-0.000969017	-0.0030883	-0.000385771
280.83	-0.0887733	-0.0123781	-0.00181925	-0.000981712	-0.00313162	-0.000385134
281.21	-0.0890524	-0.0125612	-0.00182381	-0.000994431	-0.00317505	-0.000384485
281.59	-0.0893311	-0.0127448	-0.00182836	-0.00100718	-0.0032186	-0.000383825
281.98	-0.0896093	-0.0129289	-0.00183291	-0.00101994	-0.00326226	-0.000383154
282.36	-0.0898872	-0.0131135	-0.00183746	-0.00103274	-0.00330603	-0.000382471
282.74	-0.0901647	-0.0132987	-0.001842	-0.00104556	-0.00334991	-0.000381777
283.12	-0.0904417	-0.0134843	-0.00184653	-0.0010584	-0.0033939	-0.000381071
283.5	-0.0907183	-0.0136703	-0.00185106	-0.00107126	-0.003438	-0.000380353
283.88	-0.0909945	-0.0138569	-0.00185559	-0.00108415	-0.00348221	-0.000379624
284.26	-0.0912702	-0.014044	-0.00186011	-0.00109706	-0.00352653	-0.000378884
284.64	-0.0915454	-0.0142315	-0.00186463	-0.00110999	-0.00357095	-0.000378131
285.02	-0.0918203	-0.0144195	-0.00186914	-0.00112295	-0.00361549	-0.000377367
285.4	-0.0920946	-0.014608	-0.00187365	-0.00113593	-0.00366012	-0.000376591
285.78	-0.0923685	-0.014797	-0.00187815	-0.00114893	-0.00370487	-0.000375803
286.16	-0.0926419	-0.0149864	-0.00188265	-0.00116195	-0.00374972	-0.000375003
286.54	-0.0929148	-0.0151764	-0.00188714	-0.00117499	-0.00379468	-0.000374191
286.92	-0.0931872	-0.0153668	-0.00189163	-0.00118806	-0.00383974	-0.000373368
287.3	-0.0934591	-0.0155576	-0.00189611	-0.00120115	-0.00388491	-0.000372532
287.67	-0.0937305	-0.0157489	-0.00190059	-0.00121425	-0.00393017	-0.000371684
288.05	-0.0940013	-0.0159407	-0.00190506	-0.00122738	-0.00397554	-0.000370824
288.43	-0.0942717	-0.0161329	-0.00190953	-0.00124053	-0.00402101	-0.000369951
288.81	-0.0945415	-0.0163256	-0.00191399	-0.0012537	-0.00406658	-0.000369066
289.18	-0.0948107	-0.0165187	-0.00191845	-0.00126688	-0.00411225	-0.000368169
289.56	-0.0950793	-0.0167123	-0.0019229	-0.00128009	-0.00415801	-0.00036726
289.94	-0.0953474	-0.0169062	-0.00192734	-0.00129331	-0.00420387	-0.000366338
290.31	-0.0956149	-0.0171007	-0.00193178	-0.00130655	-0.00424982	-0.000365404
290.69	-0.0958818	-0.0172955	-0.00193621	-0.00131981	-0.00429587	-0.000364457
291.06	-0.0961481	-0.0174907	-0.00194063	-0.00133308	-0.004342	-0.000363497
291.44	-0.0964137	-0.0176864	-0.00194505	-0.00134637	-0.00438823	-0.000362525
291.85	-0.0966788	-0.0178824	-0.00194946	-0.00135968	-0.00443454	-0.00036154
292.24	-0.0969431	-0.0180789	-0.00195387	-0.001373	-0.00448094	-0.000360542
292.63	-0.0972069	-0.0182757	-0.00195827	-0.00138633	-0.00452742	-0.000359532
293.03	-0.0974699	-0.0184729	-0.00196266	-0.00139968	-0.00457398	-0.000358508
293.42	-0.0977323	-0.0186705	-0.00196704	-0.00141304	-0.00462063	-0.000357472
293.81	-0.0979939	-0.0188684	-0.00197142	-0.00142641	-0.00466735	-0.000356423
294.2	-0.0982549	-0.0190667	-0.00197579	-0.0014398	-0.00471415	-0.000355361
294.59	-0.0985151	-0.0192654	-0.00198015	-0.00145319	-0.00476103	-0.000354285
294.98	-0.0987746	-0.0194644	-0.00198451	-0.0014666	-0.00480798	-0.000353197
295.37	-0.0990333	-0.0196637	-0.00198886	-0.00148002	-0.00485501	-0.000352095
295.76	-0.0992913	-0.0198634	-0.0019932	-0.00149345	-0.0049021	-0.00035098
296.15	-0.0995485	-0.0200634	-0.00199753	-0.00150688	-0.00494927	-0.000349852
296.54	-0.0998049	-0.0202638	-0.00200185	-0.00152033	-0.00499651	-0.00034871
296.93	-0.100061	-0.0204644	-0.00200617	-0.00153378	-0.00504381	-0.000347555
297.32	-0.100315	-0.0206654	-0.00201048	-0.00154724	-0.00509118	-0.000346387
297.71	-0.100569	-0.0208666	-0.00201478	-0.0015607	-0.00513861	-0.000345204
298.1	-0.100822	-0.0210682	-0.00201907	-0.00157417	-0.00518609	-0.000344008
298.49	-0.101075	-0.02127	-0.00202335	-0.00158765	-0.00523364	-0.000342799
298.88	-0.101326	-0.0214721	-0.00202762	-0.00160113	-0.00528124	-0.000341575
299.27	-0.101576	-0.0216744	-0.00203188	-0.00161461	-0.00532889	-0.000340338
299.65	-0.101826	-0.021877	-0.00203614	-0.00162809	-0.0053766	-0.000339087
300.04	-0.102074	-0.0220799	-0.00204038	-0.00164158	-0.00542436	-0.000337821
300.43	-0.102322	-0.022283	-0.00204461	-0.00165507	-0.00547216	-0.000336542
300.82	-0.102569	-0.0224863	-0.00204884	-0.00166855	-0.00552001	-0.000335249
301.2	-0.102814	-0.0226898	-0.00205305	-0.00168204	-0.00556791	-0.000333941
301.59	-0.103059	-0.0228936	-0.00205726	-0.00169553	-0.00561584	-0.000332619
301.98	-0.103303	-0.0230976	-0.00206145	-0.00170902	-0.00566382	-0.000331283
302.36	-0.103546	-0.0233018	-0.00206564	-0.0017225	-0.00571184	-0.000329933
302.75	-0.103787	-0.0235061	-0.00206981	-0.00173598	-0.0057599	-0.000328568
303.13	-0.104028	-0.0237107	-0.00207398	-0.00174946	-0.00580799	-0.000327189
303.52	-0.104268	-0.0239154	-0.00207813	-0.00176294	-0.00585612	-0.000325796
303.9	-0.104506	-0.0241204	-0.00208227	-0.00177641	-0.00590427	-0.000324388
304.29	-0.104744	-0.0243255	-0.00208641	-0.00178988	-0.00595247	-0.000322965
304.67	-0.10498	-0.0245307	-0.00209053	-0.00180334	-0.00600069	-0.000321528
305.06	-0.105215	-0.0247362	-0.00209464	-0.0018168	-0.00604894	-0.000320076
305.44	-0.10545	-0.0249418	-0.00209874	-0.00183025	-0.00609722	-0.000318609
305.83	-0.105683	-0.0251475	-0.00210282	-0.00184369	-0.00614552	-0.000317128
306.21	-0.105915	-0.0253534	-0.0021069	-0.00185713	-0.00619385	-0.000315632
306.59	-0.106146	-0.0255594	-0.00211096	-0.00187055	-0.0062422	-0.000314121
306.98	-0.106375	-0.0257655	-0.00211502	-0.00188397	-0.00629057	-0.000312595
307.36	-0.106604	-0.0259717	-0.00211906	-0.00189738	-0.00633895	-0.000311054
307.74	-0.106831	-0.0261781	-0.00212309	-0.00191078	-0.00638734	-0.000309497
308.12	-0.107057	-0.0263845	-0.0021271	-0.00192417	-0.00643575	-0.000307926
308.51	-0.107282	-0.026591	-0.00213111	-0.00193754	-0.00648416	-0.00030634
308.89	-0.107506	-0.0267975	-0.0021351	-0.0019509	-0.00653258	-0.000304738
309.27	-0.107728	-0.0270041	-0.00213908	-0.00196425	-0.00658101	-0.000303121
309.65	-0.10795	-0.0272108	-0.00214305	-0.00197758	-0.00662944	-0.000301489
310.03	-0.108169	-0.0274175	-0.002147	-0.00199089	-0.00667787	-0.000299841
310.41	-0.108388	-0.0276243	-0.00215094	-0.00200419	-0.0067263	-0.000298178
310.79	-0.108605	-0.0278311	-0.00215487	-0.00201748	-0.00677472	-0.000296499
311.17	-0.108821	-0.0280379	-0.00215879	-0.00203074	-0.00682313	-0.000294805
311.55	-0.109036	-0.0282447	-0.00216269	-0.00204399	-0.00687154	-0.000293095
311.93	-0.109249	-0.0284515	-0.00216657	-0.00205721	-0.00691994	-0.000291369
312.31	-0.109461	-0.0286583	-0.00217045	-0.00207042	-0.00696832	-0.000289628
312.69	-0.109672	-0.028865	-0.00217431	-0.0020836	-0.00701669	-0.000287871
313.07	-0.109881	-0.0290718	-0.00217815	-0.00209677	-0.00706504	-0.000286098
313.45	-0.110088	-0.0292785	-0.00218199	-0.00210991	-0.00711337	-0.000284309
313.83	-0.110295	-0.0294851	-0.0021858	-0.00212303	-0.00716168	-0.000282504
314.21	-0.110499	-0.0296918	-0.00218961	-0.00213613	-0.00720997	-0.000280684
314.59	-0.110703	-0.0298984	-0.0021934	-0.0021492	-0.00725824	-0.000278847
314.96	-0.110905	-0.0301049	-0.00219717	-0.00216225	-0.00730649	-0.000276994
315.34	-0.111105	-0.0303113	-0.00220093	-0.00217527	-0.0073547	-0.000275124
315.72	-0.111304	-0.0305177	-0.00220467	-0.00218827	-0.00740289	-0.000273239
316.1	-0.111502	-0.030724	-0.0022084	-0.00220124	-0.00745104	-0.000271336
316.47	-0.111698	-0.0309302	-0.00221212	-0.00221419	-0.00749917	-0.000269418
316.85	-0.111892	-0.0311363	-0.00221582	-0.0022271	-0.00754726	-0.000267483
317.23	-0.112085	-0.0313423	-0.0022195	-0.00223999	-0.00759531	-0.000265531
317.6	-0.112276	-0.0315482	-0.00222316	-0.00225285	-0.00764332	-0.000263563
317.98	-0.112466	-0.0317539	-0.00222682	-0.00226568	-0.00769129	-0.000261577
318.35	-0.112654	-0.0319596	-0.00223045	-0.00227848	-0.00773923	-0.000259576
318.73	-0.11284	-0.0321651	-0.00223407	-0.00229125	-0.00778712	-0.000257557
319.1	-0.113025	-0.0323705	-0.00223767	-0.00230398	-0.00783497	-0.000255521
319.48	-0.113208	-0.0325757	-0.00224126	-0.00231669	-0.00788277	-0.000253468
319.85	-0.113389	-0.0327808	-0.00224483	-0.00232936	-0.00793052	-0.000251398
320.23	-0.113569	-0.0329857	-0.00224838	-0.002342	-0.00797823	-0.000249311
320.6	-0.113747	-0.0331905	-0.00225191	-0.00235461	-0.00802588	-0.000247207
320.98	-0.113924	-0.0333951	-0.00225543	-0.00236718	-0.00807349	-0.000245085
321.35	-0.114099	-0.0335996	-0.00225893	-0.00237972	-0.00812104	-0.000242947
321.72	-0.114272	-0.0338038	-0.00226242	-0.00239222	-0.00816854	-0.00024079
322.1	-0.114443	-0.0340079	-0.00226588	-0.00240469	-0.00821599	-0.000238617
322.47	-0.114612	-0.0342119	-0.00226933	-0.00241712	-0.00826339	-0.000236425
322.84	-0.11478	-0.0344156	-0.00227276	-0.00242952	-0.00831073	-0.000234216
323.22	-0.114946	-0.0346192	-0.00227618	-0.00244189	-0.00835802	-0.00023199
323.59	-0.115111	-0.0348226	-0.00227957	-0.00245421	-0.00840524	-0.000229745
323.96	-0.115273	-0.0350258	-0.00228295	-0.0024665	-0.00845241	-0.000227483
324.33	-0.115434	-0.0352288	-0.00228631	-0.00247876	-0.00849953	-0.000225203
324.7	-0.115593	-0.0354316	-0.00228965	-0.00249097	-0.00854658	-0.000222905
325.08	-0.11575	-0.0356341	-0.00229298	-0.00250315	-0.00859356	-0.000220589
325.45	-0.115905	-0.0358365	-0.00229628	-0.00251529	-0.00864048	-0.000218254
325.82	-0.116059	-0.0360386	-0.00229957	-0.00252739	-0.00868734	-0.000215902
326.19	-0.11621	-0.0362405	-0.00230283	-0.00253944	-0.00873413	-0.000213531
326.56	-0.11636	-0.0364422	-0.00230608	-0.00255146	-0.00878084	-0.000211141
326.93	-0.116508	-0.0366436	-0.00230931	-0.00256343	-0.00882749	-0.000208734
327.3	-0.116653	-0.0368447	-0.00231252	-0.00257537	-0.00887406	-0.000206307
327.67	-0.116797	-0.0370456	-0.00231571	-0.00258726	-0.00892056	-0.000203863
328.04	-0.116939	-0.0372463	-0.00231888	-0.0025991	-0.00896698	-0.000201399
328.41	-0.117079	-0.0374466	-0.00232203	-0.0026109	-0.00901332	-0.000198917
328.78	-0.117217	-0.0376467	-0.00232515	-0.00262266	-0.00905958	-0.000196416
329.15	-0.117353	-0.0378464	-0.00232826	-0.00263437	-0.00910575	-0.000193896
329.51	-0.117487	-0.0380459	-0.00233135	-0.00264603	-0.00915184	-0.000191357
329.88	-0.117619	-0.038245	-0.00233442	-0.00265765	-0.00919784	-0.000188799
330.25	-0.117749	-0.0384439	-0.00233747	-0.00266921	-0.00924376	-0.000186221
330.62	-0.117876	-0.0386424	-0.00234049	-0.00268074	-0.00928959	-0.000183625
330.99	-0.118002	-0.0388406	-0.0023435	-0.00269221	-0.00933532	-0.000181009
331.35	-0.118126	-0.0390385	-0.00234648	-0.00270363	-0.00938097	-0.000178374
331.72	-0.118247	-0.039236	-0.00234944	-0.002715	-0.00942652	-0.00017572
332.09	-0.118366	-0.0394332	-0.00235239	-0.00272633	-0.00947198	-0.000173045
332.45	-0.118484	-0.0396301	-0.0023553	-0.0027376	-0.00951735	-0.000170352
332.82	-0.118599	-0.0398267	-0.0023582	-0.00274882	-0.00956262	-0.000167638
333.19	-0.118712	-0.0400228	-0.00236108	-0.00276	-0.00960779	-0.000164905
333.55	-0.118822	-0.0402187	-0.00236393	-0.00277111	-0.00965286	-0.000162151
333.92	-0.118931	-0.0404141	-0.00236676	-0.00278218	-0.00969783	-0.000159378
334.28	-0.119037	-0.0406092	-0.00236957	-0.00279319	-0.0097427	-0.000156584
334.65	-0.119141	-0.0408039	-0.00237235	-0.00280415	-0.00978747	-0.000153771
335.01	-0.119243	-0.0409982	-0.00237512	-0.00281506	-0.00983213	-0.000150937
335.38	-0.119342	-0.0411922	-0.00237785	-0.00282591	-0.00987668	-0.000148082
335.74	-0.11944	-0.0413857	-0.00238057	-0.0028367	-0.00992113	-0.000145208
336.11	-0.119535	-0.0415789	-0.00238326	-0.00284744	-0.00996547	-0.000142312
336.47	-0.119627	-0.0417716	-0.00238593	-0.00285812	-0.0100097	-0.000139396
336.84	-0.119717	-0.041964	-0.00238858	-0.00286875	-0.0100538	-0.000136459
337.2	-0.119805	-0.0421559	-0.0023912	-0.00287932	-0.0100978	-0.000133502
337.56	-0.119891	-0.0423474	-0.00239379	-0.00288982	-0.0101417	-0.000130524
337.93	-0.119974	-0.0425385	-0.00239636	-0.00290027	-0.0101855	-0.000127524
338.29	-0.120055	-0.0427291	-0.00239891	-0.00291067	-0.0102291	-0.000124504
338.65	-0.120133	-0.0429193	-0.00240144	-0.002921	-0.0102726	-0.000121462
339.01	-0.120209	-0.0431091	-0.00240393	-0.00293127	-0.0103161	-0.0001184
339.38	-0.120283	-0.0432984	-0.00240641	-0.00294148	-0.0103593	-0.000115316
339.74	-0.120354	-0.0434873	-0.00240886	-0.00295163	-0.0104025	-0.000112211
340.1	-0.120423	-0.0436757	-0.00241128	-0.00296171	-0.0104456	-0.000109084
340.46	-0.120489	-0.0438636	-0.00241368	-0.00297174	-0.0104885	-0.000105936
340.82	-0.120552	-0.0440511	-0.00241605	-0.0029817	-0.0105313	-0.000102766
341.18	-0.120614	-0.0442382	-0.0024184	-0.0029916	-0.0105739	-9.95742e-05
341.54	-0.120672	-0.0444247	-0.00242072	-0.00300144	-0.0106165	-9.6361e-05
341.91	-0.120728	-0.0446108	-0.00242301	-0.00301122	-0.0106589	-9.31259e-05
342.27	-0.120782	-0.0447964	-0.00242528	-0.00302092	-0.0107012	-8.9869e-05
342.63	-0.120833	-0.0449814	-0.00242753	-0.00303057	-0.0107433	-8.659e-05
342.99	-0.120881	-0.045166	-0.00242974	-0.00304015	-0.0107853	-8.32889e-05
343.35	-0.120927	-0.0453501	-0.00243193	-0.00304966	-0.0108272	-7.99657e-05
343.71	-0.120971	-0.0455337	-0.0024341	-0.0030591	-0.0108689	-7.66203e-05
344.06	-0.121011	-0.0457167	-0.00243623	-0.00306848	-0.0109105	-7.32525e-05
344.42	-0.121049	-0.0458992	-0.00243834	-0.00307778	-0.010952	-6.98623e-05
344.78	-0.121085	-0.0460812	-0.00244042	-0.00308702	-0.0109933	-6.64496e-05
345.14	-0.121117	-0.0462626	-0.00244248	-0.00309619	-0.0110344	-6.30144e-05
345.5	-0.121147	-0.0464435	-0.00244451	-0.00310529	-0.0110754	-5.95566e-05
345.86	-0.121174	-0.0466238	-0.00244651	-0.00311432	-0.0111163	-5.60761e-05
346.22	-0.121199	-0.0468035	-0.00244848	-0.00312327	-0.011157	-5.25728e-05
346.57	-0.121221	-0.0469827	-0.00245042	-0.00313216	-0.0111976	-4.90467e-05
346.93	-0.12124	-0.0471613	-0.00245234	-0.00314097	-0.011238	-4.54977e-05
347.29	-0.121256	-0.0473393	-0.00245422	-0.0031497	-0.0112782	-4.19256e-05
347.65	-0.12127	-0.0475167	-0.00245608	-0.00315837	-0.0113183	-3.83305e-05
348	-0.12128	-0.0476935	-0.00245791	-0.00316695	-0.0113582	-3.47122e-05
348.36	-0.121288	-0.0478697	-0.00245971	-0.00317547	-0.011398	-3.10706e-05
348.71	-0.121293	-0.0480453	-0.00246148	-0.0031839	-0.0114376	-2.74056e-05
349.07	-0.121296	-0.0482203	-0.00246323	-0.00319226	-0.0114771	-2.37173e-05
349.43	-0.121295	-0.0483947	-0.00246494	-0.00320055	-0.0115163	-2.00054e-05
349.78	-0.121291	-0.0485685	-0.00246662	-0.00320876	-0.0115555	-1.62698e-05
350.14	-0.121285	-0.0487416	-0.00246828	-0.00321689	-0.0115944	-1.25106e-05
350.49	-0.121276	-0.0489141	-0.0024699	-0.00322495	-0.0116332	-8.72753e-06
350.85	-0.121264	-0.049086	-0.0024715	-0.00323292	-0.0116718	-4.92058e-06
351.2	-0.121249	-0.0492573	-0.00247306	-0.00324082	-0.0117103	-1.08964e-06
351.56	-0.121231	-0.049428	-0.00247459	-0.00324864	-0.0117486	2.76542e-06
351.91	-0.12121	-0.049598	-0.0024761	-0.00325638	-0.0117867	6.64469e-06
352.27	-0.121186	-0.0497673	-0.00247757	-0.00326405	-0.0118247	1.05483e-05
352.62	-0.121159	-0.0499361	-0.00247901	-0.00327163	-0.0118625	1.44762e-05
352.97	-0.121129	-0.0501042	-0.00248042	-0.00327913	-0.0119001	1.84287e-05
353.33	-0.121096	-0.0502716	-0.00248181	-0.00328656	-0.0119375	2.24057e-05
353.68	-0.12106	-0.0504384	-0.00248315	-0.0032939	-0.0119748	2.64074e-05
354.03	-0.121021	-0.0506045	-0.00248447	-0.00330116	-0.0120119	3.04338e-05
354.39	-0.120979	-0.05077	-0.00248576	-0.00330834	-0.0120488	3.44851e-05
354.74	-0.120934	-0.0509348	-0.00248701	-0.00331544	-0.0120855	3.85612e-05
355.11	-0.120886	-0.051099	-0.00248824	-0.00332245	-0.0121221	4.26623e-05
355.48	-0.120835	-0.0512624	-0.00248943	-0.00332939	-0.0121585	4.67885e-05
355.85	-0.12078	-0.0514252	-0.00249058	-0.00333624	-0.0121947	5.09399e-05
356.21	-0.120723	-0.0515873	-0.00249171	-0.003343	-0.0122307	5.51166e-05
356.58	-0.120662	-0.0517488	-0.0024928	-0.00334969	-0.0122666	5.93186e-05
356.94	-0.120599	-0.0519095	-0.00249387	-0.00335629	-0.0123022	6.35461e-05
357.31	-0.120532	-0.0520696	-0.00249489	-0.0033628	-0.0123377	6.77992e-05
357.67	-0.120462	-0.052229	-0.00249589	-0.00336924	-0.012373	7.20778e-05
358.04	-0.120389	-0.0523878	-0.00249685	-0.00337558	-0.0124082	7.63822e-05
358.4	-0.120312	-0.0525458	-0.00249778	-0.00338185	-0.0124431	8.07125e-05
358.76	-0.120233	-0.0527032	-0.00249868	-0.00338803	-0.0124779	8.50686e-05
359.13	-0.12015	-0.0528598	-0.00249954	-0.00339412	-0.0125125	8.94507e-05
359.49	-0.120064	-0.0530158	-0.00250037	-0.00340012	-0.0125468	9.3859e-05
359.85	-0.119974	-0.053171	-0.00250117	-0.00340604	-0.0125811	9.82934e-05
360.22	-0.119882	-0.0533255	-0.00250193	-0.00341188	-0.0126151	0.000102754
360.58	-0.119786	-0.0534794	-0.00250265	-0.00341762	-0.0126489	0.000107241
360.94	-0.119687	-0.0536325	-0.00250335	-0.00342328	-0.0126825	0.000111755
361.3	-0.119584	-0.0537848	-0.00250401	-0.00342884	-0.012716	0.000116295
361.67	-0.119479	-0.0539364	-0.00250463	-0.00343432	-0.0127492	0.000120862
362.03	-0.119369	-0.0540873	-0.00250522	-0.00343971	-0.0127823	0.000125456
362.39	-0.119257	-0.0542374	-0.00250577	-0.003445	-0.0128151	0.000130076
362.75	-0.119141	-0.0543868	-0.00250629	-0.0034502	-0.0128478	0.000134724
363.11	-0.119022	-0.0545354	-0.00250677	-0.00345531	-0.0128802	0.000139398
363.47	-0.118899	-0.0546832	-0.00250722	-0.00346033	-0.0129125	0.0001441
363.84	-0.118773	-0.0548302	-0.00250763	-0.00346525	-0.0129445	0.000148829
364.2	-0.118643	-0.0549764	-0.002508	-0.00347008	-0.0129763	0.000153585
364.56	-0.11851	-0.0551218	-0.00250834	-0.0034748	-0.0130079	0.000158369
364.92	-0.118373	-0.0552664	-0.00250864	-0.00347944	-0.0130393	0.00016318
365.28	-0.118233	-0.0554101	-0.00250891	-0.00348397	-0.0130705	0.000168019
365.64	-0.118089	-0.055553	-0.00250913	-0.00348841	-0.0131015	0.000172885
366	-0.117942	-0.0556951	-0.00250933	-0.00349275	-0.0131322	0.000177779
366.36	-0.117791	-0.0558364	-0.00250948	-0.00349699	-0.0131627	0.000182702
366.71	-0.117636	-0.0559768	-0.00250959	-0.00350112	-0.013193	0.000187652
367.07	-0.117478	-0.0561163	-0.00250967	-0.00350516	-0.0132231	0.00019263
367.43	-0.117316	-0.056255	-0.00250971	-0.0035091	-0.0132529	0.000197637
367.79	-0.11715	-0.0563928	-0.00250971	-0.00351293	-0.0132825	0.000202672
368.15	-0.116981	-0.0565296	-0.00250968	-0.00351666	-0.0133119	0.000207735
368.51	-0.116808	-0.0566656	-0.0025096	-0.00352028	-0.0133411	0.000212827
368.87	-0.116632	-0.0568007	-0.00250948	-0.0035238	-0.01337	0.000217948
369.22	-0.116451	-0.0569349	-0.00250933	-0.00352722	-0.0133986	0.000223097
369.58	-0.116267	-0.0570681	-0.00250914	-0.00353052	-0.0134271	0.000228276
369.94	-0.116079	-0.0572004	-0.0025089	-0.00353372	-0.0134552	0.000233483
370.3	-0.115887	-0.0573318	-0.00250863	-0.0035368	-0.0134832	0.00023872
370.65	-0.115691	-0.0574622	-0.00250832	-0.00353978	-0.0135108	0.000243985
371.01	-0.115492	-0.0575916	-0.00250796	-0.00354265	-0.0135383	0.00024928
371.37	-0.115288	-0.05772	-0.00250757	-0.0035454	-0.0135655	0.000254605
371.72	-0.115081	-0.0578475	-0.00250713	-0.00354805	-0.0135924	0.000259958
372.08	-0.11487	-0.0579739	-0.00250666	-0.00355057	-0.013619	0.000265342
372.43	-0.114654	-0.0580994	-0.00250614	-0.00355299	-0.0136454	0.000270755
372.79	-0.114435	-0.0582238	-0.00250558	-0.00355529	-0.0136715	0.000276198
373.15	-0.114212	-0.0583472	-0.00250498	-0.00355747	-0.0136974	0.000281671
373.5	-0.113984	-0.0584695	-0.00250434	-0.00355953	-0.013723	0.000287173
373.86	-0.113753	-0.0585908	-0.00250365	-0.00356148	-0.0137483	0.000292706
374.21	-0.113517	-0.058711	-0.00250293	-0.0035633	-0.0137734	0.000298269
374.57	-0.113278	-0.0588302	-0.00250216	-0.00356501	-0.0137981	0.000303862
374.92	-0.113034	-0.0589483	-0.00250134	-0.0035666	-0.0138226	0.000309486
375.27	-0.112787	-0.0590653	-0.00250049	-0.00356807	-0.0138468	0.00031514
375.62	-0.112535	-0.0591812	-0.00249959	-0.00356941	-0.0138708	0.000320825
375.96	-0.112279	-0.059296	-0.00249865	-0.00357063	-0.0138944	0.00032654
376.32	-0.112018	-0.0594097	-0.00249766	-0.00357173	-0.0139178	0.000332287
376.67	-0.111754	-0.0595223	-0.00249663	-0.0035727	-0.0139408	0.000338064
377.02	-0.111485	-0.0596337	-0.00249556	-0.00357354	-0.0139636	0.000343872
377.38	-0.111212	-0.0597439	-0.00249444	-0.00357426	-0.013986	0.000349711
377.73	-0.110935	-0.059853	-0.00249328	-0.00357485	-0.0140082	0.000355581
378.08	-0.110653	-0.0599609	-0.00249207	-0.0035753	-0.0140301	0.000361483
378.43	-0.110367	-0.0600676	-0.00249082	-0.00357563	-0.0140516	0.000367416
378.79	-0.110077	-0.060173	-0.00248952	-0.00357582	-0.0140728	0.00037338
379.14	-0.109782	-0.0602772	-0.00248817	-0.00357587	-0.0140937	0.000379376
379.49	-0.109483	-0.0603802	-0.00248678	-0.00357579	-0.0141143	0.000385404
379.84	-0.109179	-0.0604819	-0.00248535	-0.00357558	-0.0141346	0.000391464
380.19	-0.108871	-0.0605823	-0.00248386	-0.00357522	-0.0141545	0.000397555
380.54	-0.108559	-0.0606814	-0.00248233	-0.00357473	-0.0141741	0.000403679
380.9	-0.108242	-0.0607792	-0.00248076	-0.0035741	-0.0141934	0.000409834
381.25	-0.10792	-0.0608757	-0.00247913	-0.00357332	-0.0142123	0.000416022
381.6	-0.107593	-0.0609708	-0.00247746	-0.0035724	-0.0142309	0.000422242
381.95	-0.107263	-0.0610646	-0.00247574	-0.00357133	-0.0142491	0.000428495
382.3	-0.106927	-0.061157	-0.00247397	-0.00357012	-0.014267	0.00043478
382.65	-0.106587	-0.061248	-0.00247216	-0.00356876	-0.0142845	0.000441097
383	-0.106242	-0.0613377	-0.00247029	-0.00356726	-0.0143017	0.000447447
383.35	-0.105892	-0.0614259	-0.00246838	-0.00356561	-0.0143185	0.00045383
383.7	-0.105538	-0.0615128	-0.00246641	-0.0035638	-0.014335	0.000460247
384.05	-0.105179	-0.0615982	-0.0024644	-0.00356185	-0.0143511	0.000466696
384.4	-0.104815	-0.0616822	-0.00246234	-0.00355975	-0.0143668	0.000473178
384.74	-0.104446	-0.0617648	-0.00246023	-0.0035575	-0.0143822	0.000479694
385.09	-0.104073	-0.0618459	-0.00245807	-0.00355509	-0.0143972	0.000486243
385.44	-0.103694	-0.0619256	-0.00245586	-0.00355253	-0.0144118	0.000492825
385.79	-0.103311	-0.0620038	-0.0024536	-0.00354981	-0.014426	0.000499441
386.14	-0.102923	-0.0620805	-0.00245128	-0.00354694	-0.0144399	0.000506091
386.49	-0.10253	-0.0621557	-0.00244892	-0.00354391	-0.0144534	0.000512775
386.83	-0.102132	-0.0622295	-0.0024465	-0.00354072	-0.0144665	0.000519493
387.18	-0.101729	-0.0623017	-0.00244404	-0.00353738	-0.0144792	0.000526245
387.53	-0.101321	-0.0623724	-0.00244152	-0.00353387	-0.0144916	0.000533031
387.88	-0.100908	-0.0624416	-0.00243895	-0.00353021	-0.0145035	0.000539851
388.22	-0.10049	-0.0625093	-0.00243632	-0.00352638	-0.0145151	0.000546706
388.57	-0.100067	-0.0625754	-0.00243365	-0.0035224	-0.0145262	0.000553596
388.92	-0.0996388	-0.0626399	-0.00243092	-0.00351825	-0.014537	0.00056052
389.26	-0.0992055	-0.0627029	-0.00242814	-0.00351393	-0.0145474	0.000567479
389.61	-0.0987672	-0.0627644	-0.0024253	-0.00350945	-0.0145573	0.000574473
389.95	-0.0983236	-0.0628242	-0.00242242	-0.00350481	-0.0145669	0.000581502
390.3	-0.097875	-0.0628825	-0.00241947	-0.0035	-0.0145761	0.000588566
390.65	-0.0974211	-0.0629391	-0.00241648	-0.00349503	-0.0145848	0.000595665
390.99	-0.096962	-0.0629942	-0.00241343	-0.00348988	-0.0145932	0.0006028
391.34	-0.0964977	-0.0630477	-0.00241033	-0.00348458	-0.0146011	0.00060997
391.68	-0.0960282	-0.0630996	-0.00240717	-0.0034791	-0.0146087	0.000617176
392.03	-0.0955534	-0.0631499	-0.00240395	-0.00347346	-0.0146158	0.000624418
392.37	-0.0950734	-0.0631985	-0.00240069	-0.00346764	-0.0146225	0.000631695
392.72	-0.094588	-0.0632456	-0.00239736	-0.00346166	-0.0146288	0.000639008
393.06	-0.0940973	-0.063291	-0.00239399	-0.00345551	-0.0146347	0.000646358
393.4	-0.0936012	-0.0633348	-0.00239055	-0.00344918	-0.0146402	0.000653744
393.75	-0.0930998	-0.0633769	-0.00238706	-0.00344268	-0.0146452	0.000661166
394.09	-0.0925929	-0.0634173	-0.00238351	-0.00343601	-0.0146498	0.000668624
394.43	-0.0920806	-0.063456	-0.00237991	-0.00342916	-0.014654	0.00067612
394.76	-0.0915629	-0.0634931	-0.00237625	-0.00342214	-0.0146578	0.000683651
395.09	-0.0910396	-0.0635285	-0.00237253	-0.00341494	-0.0146611	0.00069122
395.42	-0.0905109	-0.0635621	-0.00236876	-0.00340756	-0.014664	0.000698826
395.75	-0.0899766	-0.063594	-0.00236493	-0.0034	-0.0146664	0.000706469
396.09	-0.0894367	-0.0636241	-0.00236104	-0.00339226	-0.0146684	0.000714149
396.42	-0.0888912	-0.0636525	-0.00235709	-0.00338433	-0.01467	0.000721866
396.75	-0.0883401	-0.0636791	-0.00235308	-0.00337623	-0.0146711	0.000729621
397.08	-0.0877833	-0.0637039	-0.00234901	-0.00336794	-0.0146717	0.000737413
397.41	-0.0872208	-0.0637269	-0.00234489	-0.00335946	-0.0146719	0.000745243
397.74	-0.0866526	-0.063748	-0.0023407	-0.00335079	-0.0146716	0.00075311
398.07	-0.0860787	-0.0637673	-0.00233646	-0.00334193	-0.0146709	0.000761016
398.4	-0.0854989	-0.0637848	-0.00233215	-0.00333288	-0.0146696	0.00076896
398.73	-0.0849134	-0.0638004	-0.00232779	-0.00332365	-0.0146679	0.000776941
399.06	-0.084322	-0.0638141	-0.00232336	-0.00331422	-0.0146658	0.000784962
399.39	-0.0837248	-0.0638259	-0.00231888	-0.00330459	-0.0146631	0.00079302
399.72	-0.0831217	-0.0638359	-0.00231433	-0.00329478	-0.01466	0.000801117
400.05	-0.0825127	-0.0638439	-0.00230972	-0.00328477	-0.0146564	0.000809253
400.38	-0.0818978	-0.0638501	-0.00230505	-0.00327457	-0.0146523	0.000817428
400.71	-0.081277	-0.0638543	-0.00230032	-0.00326416	-0.0146477	0.000825641
401.04	-0.0806501	-0.0638566	-0.00229552	-0.00325356	-0.0146426	0.000833894
401.37	-0.0800173	-0.063857	-0.00229067	-0.00324277	-0.0146371	0.000842186
401.7	-0.0793784	-0.0638554	-0.00228575	-0.00323177	-0.014631	0.000850517
402.03	-0.0787334	-0.0638518	-0.00228076	-0.00322057	-0.0146245	0.000858888
402.36	-0.0780823	-0.0638462	-0.00227572	-0.00320916	-0.0146174	0.000867298
402.69	-0.0774251	-0.0638386	-0.00227061	-0.00319756	-0.0146098	0.000875748
403.02	-0.0767617	-0.063829	-0.00226543	-0.00318575	-0.0146017	0.000884238
403.35	-0.0760922	-0.0638174	-0.00226019	-0.00317373	-0.0145931	0.000892768
403.67	-0.0754165	-0.0638038	-0.00225489	-0.00316151	-0.014584	0.000901338
404	-0.0747346	-0.0637881	-0.00224952	-0.00314908	-0.0145744	0.000909948
404.33	-0.0740464	-0.0637704	-0.00224409	-0.00313645	-0.0145643	0.000918598
404.66	-0.073352	-0.0637506	-0.00223859	-0.0031236	-0.0145536	0.000927288
404.99	-0.0726513	-0.0637287	-0.00223302	-0.00311055	-0.0145424	0.000936019
405.32	-0.0719443	-0.0637048	-0.00222739	-0.00309728	-0.0145307	0.00094479
405.65	-0.071231	-0.0636787	-0.0022217	-0.0030838	-0.0145185	0.000953602
405.98	-0.0705114	-0.0636506	-0.00221593	-0.00307011	-0.0145057	0.000962454
406.3	-0.0697854	-0.0636204	-0.00221011	-0.00305621	-0.0144924	0.000971347
406.63	-0.0690531	-0.063588	-0.00220421	-0.0030421	-0.0144785	0.000980281
406.96	-0.0683144	-0.0635535	-0.00219824	-0.00302777	-0.0144642	0.000989255
407.29	-0.0675693	-0.0635169	-0.00219221	-0.00301323	-0.0144493	0.00099827
407.62	-0.0668179	-0.0634782	-0.00218611	-0.00299848	-0.0144338	0.00100733
407.94	-0.06606	-0.0634374	-0.00217995	-0.00298351	-0.0144178	0.00101642
408.28	-0.0652958	-0.0633944	-0.00217371	-0.00296833	-0.0144013	0.00102556
408.62	-0.0645252	-0.0633493	-0.00216741	-0.00295294	-0.0143842	0.00103474
408.95	-0.0637481	-0.063302	-0.00216104	-0.00293733	-0.0143666	0.00104396
409.29	-0.0629646	-0.0632526	-0.0021546	-0.0029215	-0.0143485	0.00105322
409.62	-0.0621747	-0.063201	-0.00214809	-0.00290546	-0.0143298	0.00106252
409.97	-0.0613782	-0.0631472	-0.00214151	-0.0028892	-0.0143105	0.00107186
410.31	-0.0605753	-0.0630912	-0.00213486	-0.00287272	-0.0142907	0.00108124
410.66	-0.0597659	-0.0630331	-0.00212814	-0.00285602	-0.0142704	0.00109067
411	-0.0589499	-0.0629727	-0.00212135	-0.00283911	-0.0142495	0.00110013
411.35	-0.0581275	-0.06291	-0.0021145	-0.00282197	-0.014228	0.00110964
411.69	-0.0572985	-0.0628452	-0.00210757	-0.00280461	-0.014206	0.00111919
412.04	-0.056463	-0.0627781	-0.00210056	-0.00278704	-0.0141834	0.00112878
412.38	-0.055621	-0.0627088	-0.00209349	-0.00276924	-0.0141602	0.0011384
412.72	-0.0547724	-0.0626373	-0.00208635	-0.00275122	-0.0141365	0.00114807
413.07	-0.0539173	-0.0625634	-0.00207913	-0.00273298	-0.0141122	0.00115779
413.41	-0.0530557	-0.0624873	-0.00207185	-0.00271452	-0.0140873	0.00116754
413.75	-0.0521875	-0.0624089	-0.00206449	-0.00269583	-0.0140619	0.00117733
414.1	-0.0513127	-0.0623283	-0.00205706	-0.00267692	-0.0140359	0.00118716
414.44	-0.0504314	-0.0622453	-0.00204955	-0.00265779	-0.0140093	0.00119704
414.78	-0.0495435	-0.0621601	-0.00204197	-0.00263844	-0.0139821	0.00120695
415.12	-0.048649	-0.0620725	-0.00203432	-0.00261886	-0.0139544	0.00121691
415.47	-0.047748	-0.0619827	-0.0020266	-0.00259906	-0.0139261	0.00122691
415.81	-0.0468404	-0.0618905	-0.0020188	-0.00257904	-0.0138972	0.00123694
416.15	-0.0459262	-0.0617961	-0.00201093	-0.00255879	-0.0138678	0.00124702
416.49	-0.0450055	-0.0616994	-0.00200298	-0.00253832	-0.0138377	0.00125714
416.83	-0.0440782	-0.0616004	-0.00199496	-0.00251763	-0.0138071	0.0012673
417.17	-0.0431443	-0.061499	-0.00198687	-0.00249672	-0.0137759	0.0012775
417.51	-0.0422038	-0.0613953	-0.0019787	-0.00247558	-0.0137442	0.00128774
417.85	-0.0412567	-0.0612893	-0.00197046	-0.00245422	-0.0137118	0.00129802
418.19	-0.0403031	-0.061181	-0.00196214	-0.00243263	-0.0136789	0.00130835
418.53	-0.0393428	-0.0610704	-0.00195374	-0.00241082	-0.0136454	0.00131871
418.87	-0.038376	-0.0609574	-0.00194527	-0.00238879	-0.0136113	0.00132911
419.21	-0.0374025	-0.0608421	-0.00193672	-0.00236654	-0.0135766	0.00133956
419.55	-0.0364225	-0.0607245	-0.0019281	-0.00234406	-0.0135413	0.00135004
419.89	-0.0354359	-0.0606045	-0.0019194	-0.00232136	-0.0135055	0.00136057
420.23	-0.0344427	-0.0604823	-0.00191063	-0.00229844	-0.0134691	0.00137113
420.57	-0.033443	-0.0603576	-0.00190177	-0.0022753	-0.0134321	0.00138174
420.91	-0.0324367	-0.0602307	-0.00189284	-0.00225193	-0.0133945	0.00139238
421.24	-0.0314239	-0.0601014	-0.00188384	-0.00222835	-0.0133563	0.00140307
421.58	-0.0304046	-0.0599698	-0.00187475	-0.00220454	-0.0133176	0.00141379
421.92	-0.0293788	-0.0598359	-0.00186559	-0.00218052	-0.0132783	0.00142456
422.26	-0.0283465	-0.0596997	-0.00185635	-0.00215627	-0.0132384	0.00143536
422.59	-0.0273077	-0.0595611	-0.00184704	-0.00213181	-0.0131979	0.00144621
422.93	-0.0262624	-0.0594203	-0.00183764	-0.00210713	-0.0131569	0.00145709
423.27	-0.0252107	-0.0592771	-0.00182817	-0.00208224	-0.0131153	0.00146801
423.6	-0.0241526	-0.0591316	-0.00181862	-0.00205713	-0.0130731	0.00147898
423.94	-0.023088	-0.0589838	-0.00180899	-0.00203181	-0.0130303	0.00148998
424.28	-0.0220171	-0.0588338	-0.00179928	-0.00200627	-0.012987	0.00150102
424.61	-0.0209398	-0.0586814	-0.00178949	-0.00198052	-0.0129431	0.0015121
424.95	-0.0198562	-0.0585268	-0.00177962	-0.00195455	-0.0128986	0.00152322
425.28	-0.0187662	-0.0583699	-0.00176967	-0.00192838	-0.0128536	0.00153437
425.62	-0.0176698	-0.0582107	-0.00175965	-0.00190199	-0.012808	0.00154557
425.95	-0.0165671	-0.0580492	-0.00174954	-0.00187539	-0.0127618	0.0015568
426.29	-0.0154581	-0.0578854	-0.00173935	-0.00184858	-0.0127151	0.00156808
426.62	-0.0143427	-0.0577193	-0.00172909	-0.00182156	-0.0126678	0.00157939
426.96	-0.013221	-0.0575509	-0.00171874	-0.00179433	-0.0126199	0.00159074
427.29	-0.012093	-0.0573802	-0.00170831	-0.00176689	-0.0125715	0.00160212
427.63	-0.0109587	-0.0572072	-0.0016978	-0.00173923	-0.0125225	0.00161355
427.96	-0.00981806	-0.0570319	-0.00168721	-0.00171137	-0.0124729	0.00162501
428.29	-0.00867118	-0.0568543	-0.00167654	-0.0016833	-0.0124228	0.00163651
428.63	-0.00751801	-0.0566743	-0.00166579	-0.00165501	-0.0123721	0.00164805
428.96	-0.00635857	-0.0564921	-0.00165495	-0.00162652	-0.0123208	0.00165963
429.29	-0.00519285	-0.0563075	-0.00164403	-0.00159782	-0.0122689	0.00167124
429.63	-0.00402088	-0.0561206	-0.00163303	-0.0015689	-0.0122165	0.00168289
429.96	-0.00284266	-0.0559314	-0.00162195	-0.00153978	-0.0121635	0.00169458
430.29	-0.00165819	-0.0557398	-0.00161078	-0.00151045	-0.0121099	0.0017063
430.63	-0.000467474	-0.0555459	-0.00159953	-0.00148091	-0.0120558	0.00171806
430.96	0.000729472	-0.0553496	-0.0015882	-0.00145116	-0.012001	0.00172986
431.29	0.00193264	-0.055151	-0.00157678	-0.0014212	-0.0119457	0.0017417
431.63	0.003142	-0.0549501	-0.00156528	-0.00139103	-0.0118898	0.00175357
431.96	0.00435756	-0.0547468	-0.0015537	-0.00136066	-0.0118334	0.00176548
432.29	0.0055793	-0.0545412	-0.00154203	-0.00133008	-0.0117764	0.00177743
432.62	0.00680722	-0.0543332	-0.00153028	-0.00129929	-0.0117187	0.00178941
432.96	0.00804132	-0.0541229	-0.00151844	-0.0012683	-0.0116606	0.00180143
433.29	0.00928161	-0.0539102	-0.00150651	-0.0012371	-0.0116018	0.00181348
433.62	0.0105281	-0.0536951	-0.0014945	-0.00120569	-0.0115425	0.00182557
433.95	0.0117807	-0.0534777	-0.00148241	-0.00117407	-0.0114826	0.0018377
434.28	0.0130395	-0.0532579	-0.00147022	-0.00114225	-0.0114221	0.00184986
434.62	0.0143045	-0.0530357	-0.00145796	-0.00111021	-0.011361	0.00186206
434.95	0.0155757	-0.0528112	-0.0014456	-0.00107797	-0.0112993	0.00187429
435.28	0.0168531	-0.0525842	-0.00143316	-0.00104553	-0.0112371	0.00188656
435.61	0.0181366	-0.0523548	-0.00142063	-0.00101287	-0.0111742	0.00189887
435.94	0.0194262	-0.0521231	-0.00140801	-0.000980013	-0.0111108	0.00191121
436.27	0.0207219	-0.051889	-0.00139531	-0.000946948	-0.0110468	0.00192359
436.6	0.0220238	-0.0516524	-0.00138252	-0.000913678	-0.0109823	0.001936
436.93	0.0233317	-0.0514135	-0.00136964	-0.000880203	-0.0109171	0.00194844
437.26	0.0246456	-0.0511722	-0.00135667	-0.000846525	-0.0108513	0.00196093
437.59	0.0259656	-0.0509285	-0.00134361	-0.000812643	-0.010785	0.00197344
437.92	0.0272916	-0.0506824	-0.00133047	-0.00077856	-0.0107181	0.00198599
438.25	0.0286235	-0.0504339	-0.00131723	-0.000744276	-0.0106506	0.00199857
438.58	0.0299614	-0.050183	-0.00130391	-0.000709792	-0.0105826	0.00201119
438.91	0.0313052	-0.0499297	-0.0012905	-0.000675109	-0.0105139	0.00202384
439.24	0.0326549	-0.0496741	-0.001277	-0.00064023	-0.0104447	0.00203653
439.56	0.0340104	-0.0494161	-0.0012634	-0.000605155	-0.0103749	0.00204924
439.89	0.0353717	-0.0491558	-0.00124972	-0.000569886	-0.0103046	0.00206199
440.22	0.0367388	-0.0488932	-0.00123595	-0.000534426	-0.0102337	0.00207477
440.55	0.0381116	-0.0486282	-0.00122209	-0.000498774	-0.0101622	0.00208759
440.88	0.0394901	-0.0483608	-0.00120814	-0.000462931	-0.0100902	0.00210044
441.21	0.0408743	-0.0480912	-0.00119409	-0.000426898	-0.0100176	0.00211331
441.53	0.0422641	-0.0478191	-0.00117996	-0.000390677	-0.00994441	0.00212622
441.86	0.0436596	-0.0475448	-0.00116573	-0.000354267	-0.00987068	0.00213916
442.19	0.0450607	-0.0472681	-0.00115142	-0.000317668	-0.00979639	0.00215213
442.52	0.0464674	-0.046989	-0.00113701	-0.000280881	-0.00972154	0.00216514
442.84	0.0478797	-0.0467076	-0.00112251	-0.000243907	-0.00964613	0.00217817
443.17	0.0492976	-0.0464239	-0.00110792	-0.000206747	-0.00957015	0.00219123
443.5	0.050721	-0.0461378	-0.00109323	-0.000169403	-0.00949361	0.00220433
443.82	0.0521498	-0.0458494	-0.00107846	-0.000131876	-0.00941652	0.00221745
444.15	0.0535841	-0.0455586	-0.00106359	-9.41659e-05	-0.00933887	0.00223061
444.47	0.0550238	-0.0452656	-0.00104862	-5.62748e-05	-0.00926066	0.00224379
444.8	0.0564688	-0.0449701	-0.00103357	-1.82034e-05	-0.0091819	0.002257
445.13	0.0579192	-0.0446724	-0.00101842	2.00475e-05	-0.00910258	0.00227024
445.45	0.0593749	-0.0443723	-0.00100318	5.84767e-05	-0.0090227	0.00228351
445.78	0.0608359	-0.0440699	-0.00098784	9.70829e-05	-0.00894228	0.0022968
446.1	0.0623022	-0.0437652	-0.00097241	0.000135866	-0.0088613	0.00231013
446.43	0.0637737	-0.0434581	-0.000956885	0.000174824	-0.00877978	0.00232348
446.75	0.0652504	-0.0431488	-0.000941265	0.000213957	-0.0086977	0.00233686
447.08	0.0667322	-0.0428371	-0.000925551	0.000253263	-0.00861507	0.00235027
447.4	0.0682192	-0.0425231	-0.000909742	0.00029274	-0.0085319	0.0023637
447.73	0.0697113	-0.0422068	-0.000893838	0.000332387	-0.00844819	0.00237716
448.05	0.0712084	-0.0418883	-0.000877839	0.000372202	-0.00836394	0.00239065
448.38	0.0727106	-0.0415674	-0.000861744	0.000412186	-0.00827915	0.00240416
448.7	0.0742177	-0.0412443	-0.000845553	0.000452336	-0.00819382	0.0024177
449.02	0.0757299	-0.0409188	-0.000829266	0.000492654	-0.00810795	0.00243126
449.35	0.0772471	-0.0405911	-0.000812883	0.000533137	-0.00802154	0.00244485
449.67	0.0787692	-0.0402611	-0.000796403	0.000573786	-0.00793459	0.00245847
449.99	0.0802962	-0.0399288	-0.000779827	0.000614599	-0.00784711	0.00247211
450.32	0.0818282	-0.0395942	-0.000763153	0.000655578	-0.00775908	0.00248577
450.64	0.0833651	-0.0392573	-0.000746382	0.000696719	-0.00767052	0.00249946
450.96	0.0849069	-0.0389181	-0.000729513	0.000738023	-0.00758142	0.00251318
451.28	0.0864535	-0.0385766	-0.000712547	0.000779488	-0.00749179	0.00252692
451.61	0.088005	-0.0382329	-0.000695483	0.000821112	-0.00740163	0.00254068
451.93	0.0895612	-0.0378869	-0.00067832	0.000862895	-0.00731094	0.00255447
452.25	0.0911221	-0.0375387	-0.000661059	0.000904834	-0.00721972	0.00256828
452.57	0.0926878	-0.0371882	-0.000643699	0.000946929	-0.00712798	0.00258211
452.89	0.0942581	-0.0368354	-0.000626241	0.000989178	-0.00703571	0.00259597
453.21	0.0958331	-0.0364804	-0.000608684	0.00103158	-0.00694292	0.00260985
453.53	0.0974127	-0.0361232	-0.000591027	0.00107413	-0.00684962	0.00262376
453.85	0.0989968	-0.0357637	-0.000573271	0.00111684	-0.0067558	0.00263768
454.17	0.100586	-0.0354021	-0.000555415	0.00115969	-0.00666146	0.00265163
454.49	0.102179	-0.0350382	-0.00053746	0.00120269	-0.00656661	0.0026656
454.81	0.103776	-0.0346721	-0.000519404	0.00124583	-0.00647125	0.00267959
455.13	0.105379	-0.0343038	-0.000501248	0.00128912	-0.00637539	0.0026936
455.44	0.106985	-0.0339334	-0.000482992	0.00133255	-0.00627903	0.00270764
455.76	0.108596	-0.0335608	-0.000464635	0.00137612	-0.00618216	0.00272169
456.08	0.110211	-0.033186	-0.000446178	0.00141983	-0.0060848	0.00273577
456.4	0.111831	-0.0328091	-0.000427619	0.00146368	-0.00598694	0.00274986
456.72	0.113454	-0.03243	-0.000408959	0.00150767	-0.00588859	0.00276398
457.03	0.115083	-0.0320488	-0.000390197	0.00155179	-0.00578974	0.00277811
457.35	0.116715	-0.0316654	-0.000371334	0.00159605	-0.0056904	0.00279227
457.67	0.118351	-0.0312799	-0.000352369	0.00164044	-0.00559057	0.00280644
457.98	0.119992	-0.0308922	-0.000333301	0.00168497	-0.00549025	0.00282064
458.31	0.121637	-0.0305024	-0.000314131	0.00172963	-0.00538944	0.00283485
458.63	0.123286	-0.0301104	-0.000294858	0.00177442	-0.00528814	0.00284909
458.96	0.124939	-0.0297164	-0.000275482	0.00181934	-0.00518635	0.00286334
459.29	0.126596	-0.0293201	-0.000256002	0.00186439	-0.00508408	0.00287761
459.62	0.128257	-0.0289218	-0.00023642	0.00190956	-0.00498133	0.0028919
459.95	0.129922	-0.0285214	-0.000216733	0.00195487	-0.00487809	0.0029062
460.27	0.131591	-0.0281188	-0.000196942	0.00200029	-0.00477438	0.00292052
460.6	0.133264	-0.0277141	-0.000177047	0.00204585	-0.00467018	0.00293487
460.93	0.134941	-0.0273073	-0.000157048	0.00209153	-0.0045655	0.00294922
461.26	0.136622	-0.0268984	-0.000136943	0.00213733	-0.00446035	0.0029636
461.58	0.138307	-0.0264873	-0.000116734	0.00218325	-0.00435472	0.00297799
461.9	0.139995	-0.0260742	-9.64193e-05	0.00222929	-0.00424862	0.0029924
462.23	0.141687	-0.0256589	-7.5999e-05	0.00227545	-0.00414203	0.00300682
462.55	0.143384	-0.0252416	-5.54729e-05	0.00232173	-0.00403498	0.00302126
462.88	0.145083	-0.0248222	-3.48407e-05	0.00236813	-0.00392746	0.00303572
463.21	0.146787	-0.0244007	-1.41022e-05	0.00241465	-0.00381947	0.00305019
463.53	0.148494	-0.0239771	6.74289e-06	0.00246127	-0.00371101	0.00306468
463.86	0.150205	-0.0235514	2.76948e-05	0.00250802	-0.00360209	0.00307918
464.18	0.15192	-0.0231237	4.87539e-05	0.00255488	-0.0034927	0.0030937
464.51	0.153638	-0.0226938	6.99204e-05	0.00260185	-0.00338284	0.00310823
464.84	0.15536	-0.0222619	9.11946e-05	0.00264893	-0.00327252	0.00312278
465.16	0.157086	-0.0218279	0.000112577	0.00269612	-0.00316174	0.00313734
465.49	0.158815	-0.0213919	0.000134067	0.00274343	-0.00305049	0.00315191
465.81	0.160548	-0.0209537	0.000155667	0.00279084	-0.00293878	0.00316651
466.14	0.162284	-0.0205135	0.000177375	0.00283837	-0.00282661	0.00318111
466.46	0.164024	-0.0200712	0.000199192	0.002886	-0.00271397	0.00319573
466.79	0.165768	-0.0196269	0.000221118	0.00293375	-0.00260088	0.00321036
467.11	0.167515	-0.0191805	0.000243155	0.00298159	-0.00248733	0.00322501
467.43	0.169265	-0.0187321	0.000265301	0.00302954	-0.00237332	0.00323967
467.76	0.171019	-0.0182816	0.000287557	0.0030776	-0.00225887	0.00325434
468.08	0.172776	-0.017829	0.000309923	0.00312575	-0.00214396	0.00326902
468.41	0.174537	-0.0173745	0.0003324	0.003174	-0.00202861	0.00328372
468.73	0.1763	-0.0169179	0.000354988	0.00322235	-0.00191282	0.00329843
469.05	0.178067	-0.0164594	0.000377687	0.0032708	-0.00179659	0.00331315
469.38	0.179837	-0.0159988	0.000400497	0.00331934	-0.00167992	0.00332788
469.7	0.181611	-0.0155363	0.000423418	0.00336797	-0.00156281	0.00334262
470.02	0.183387	-0.0150718	0.000446451	0.00341669	-0.00144528	0.00335737
470.35	0.185166	-0.0146053	0.000469595	0.0034655	-0.00132732	0.00337214
470.67	0.186949	-0.0141369	0.000492852	0.00351439	-0.00120894	0.00338691
470.99	0.188734	-0.0136666	0.000516221	0.00356336	-0.00109014	0.00340169
471.31	0.190522	-0.0131943	0.000539701	0.00361241	-0.000970933	0.00341648
471.64	0.192313	-0.0127202	0.000563295	0.00366154	-0.000851318	0.00343128
471.96	0.194106	-0.0122442	0.000587001	0.00371075	-0.000731299	0.00344609
472.28	0.195902	-0.0117663	0.000610819	0.00376003	-0.000610878	0.0034609
472.6	0.197701	-0.0112866	0.000634751	0.00380938	-0.00049006	0.00347572
472.92	0.199503	-0.010805	0.000658797	0.0038588	-0.000368848	0.00349055
473.25	0.201306	-0.0103216	0.000682955	0.00390828	-0.000247243	0.00350538
473.57	0.203113	-0.00983631	0.000707228	0.00395783	-0.000125248	0.00352023
473.89	0.204922	-0.00934922	0.000731615	0.00400745	-2.86773e-06	0.00353507
474.21	0.206733	-0.00886032	0.000756115	0.00405713	0.000119894	0.00354992
474.53	0.208546	-0.00836964	0.00078073	0.00410686	0.000243031	0.00356478
474.85	0.210362	-0.00787718	0.00080546	0.00415665	0.000366537	0.00357964
475.17	0.21218	-0.00738297	0.000830304	0.00420649	0.00049041	0.00359451
475.49	0.214	-0.00688702	0.000855263	0.00425639	0.000614643	0.00360937
475.81	0.215822	-0.00638935	0.000880337	0.00430632	0.000739233	0.00362424
476.13	0.217646	-0.00588997	0.000905526	0.0043563	0.000864175	0.00363912
476.45	0.219471	-0.00538889	0.000930831	0.00440633	0.000989463	0.00365399
476.77	0.221299	-0.00488615	0.00095625	0.00445639	0.00111509	0.00366887
477.09	0.223128	-0.00438173	0.000981786	0.00450649	0.00124106	0.00368374
477.41	0.224958	-0.00387567	0.00100744	0.00455662	0.00136736	0.00369862
477.73	0.226791	-0.00336798	0.00103321	0.00460678	0.00149399	0.00371349
478.05	0.228625	-0.00285866	0.00105909	0.00465697	0.00162095	0.00372837
478.37	0.23046	-0.00234775	0.00108509	0.00470719	0.00174823	0.00374324
478.69	0.232297	-0.00183527	0.00111121	0.00475743	0.00187582	0.00375811
479.01	0.234135	-0.00132121	0.00113744	0.00480769	0.00200372	0.00377298
479.32	0.235974	-0.000805604	0.00116379	0.00485797	0.00213192	0.00378785
479.64	0.237815	-0.000288457	0.00119026	0.00490826	0.00226043	0.00380272
479.96	0.239657	0.000230217	0.00121684	0.00495857	0.00238923	0.00381758
480.28	0.2415	0.000750406	0.00124355	0.0050089	0.00251834	0.00383244
480.6	0.243344	0.0012721	0.00127037	0.00505923	0.00264773	0.00384729
480.92	0.245189	0.00179529	0.00129731	0.00510957	0.00277741	0.00386214
481.23	0.247035	0.00231997	0.00132437	0.00515992	0.00290738	0.00387699
481.55	0.248882	0.00284612	0.00135154	0.00521027	0.00303763	0.00389183
481.87	0.25073	0.00337372	0.00137884	0.00526062	0.00316816	0.00390667
482.19	0.252578	0.00390276	0.00140625	0.00531097	0.00329896	0.0039215
482.5	0.254428	0.00443321	0.00143379	0.00536132	0.00343002	0.00393633
482.82	0.256278	0.00496506	0.00146144	0.00541166	0.00356134	0.00395114
483.14	0.258129	0.00549829	0.00148921	0.005462	0.00369292	0.00396595
483.45	0.25998	0.00603287	0.0015171	0.00551231	0.00382475	0.00398076
483.77	0.261831	0.00656878	0.00154512	0.00556261	0.00395682	0.00399555
484.09	0.263683	0.00710599	0.00157325	0.00561289	0.00408912	0.00401034
484.4	0.265536	0.0076445	0.0016015	0.00566315	0.00422165	0.00402511
484.72	0.267388	0.00818428	0.00162987	0.00571338	0.00435441	0.00403988
485.03	0.269241	0.00872532	0.00165836	0.00576358	0.00448738	0.00405464
485.35	0.271093	0.00926759	0.00168698	0.00581375	0.00462058	0.00406938
485.67	0.272946	0.00981107	0.00171571	0.00586388	0.00475397	0.00408412
485.98	0.274798	0.0103557	0.00174457	0.00591397	0.00488757	0.00409884
486.3	0.276651	0.0109016	0.00177354	0.00596403	0.00502136	0.00411355
486.61	0.278503	0.0114485	0.00180264	0.00601403	0.00515534	0.00412824
486.93	0.280354	0.0119966	0.00183186	0.00606399	0.0052895	0.00414293
487.24	0.282206	0.0125458	0.0018612	0.0061139	0.00542384	0.0041576
487.56	0.284057	0.0130961	0.00189066	0.00616375	0.00555835	0.00417225
487.87	0.285907	0.0136475	0.00192025	0.00621355	0.00569303	0.00418689
488.19	0.287757	0.0141999	0.00194995	0.00626329	0.00582788	0.00420152
488.5	0.289606	0.0147534	0.00197978	0.00631296	0.00596288	0.00421613
488.81	0.291454	0.0153079	0.00200973	0.00636258	0.00609805	0.00423072
489.13	0.293302	0.0158635	0.00203981	0.00641213	0.00623336	0.0042453
489.44	0.295149	0.01642	0.00207001	0.00646161	0.00636883	0.00425986
489.76	0.296995	0.0169776	0.00210033	0.00651103	0.00650444	0.0042744
490.07	0.29884	0.0175361	0.00213077	0.00656036	0.00664019	0.00428892
490.38	0.300684	0.0180956	0.00216134	0.00660963	0.00677608	0.00430343
490.7	0.302527	0.0186561	0.00219204	0.00665881	0.0069121	0.00431792
491.01	0.304368	0.0192175	0.00222285	0.00670792	0.00704824	0.00433238
491.32	0.306209	0.0197798	0.0022538	0.00675694	0.00718451	0.00434683
491.63	0.308048	0.020343	0.00228486	0.00680587	0.00732089	0.00436126
491.95	0.309886	0.0209072	0.00231605	0.00685472	0.0074574	0.00437567
492.26	0.311723	0.0214722	0.00234737	0.00690347	0.00759401	0.00439005
492.57	0.313558	0.0220382	0.00237881	0.00695214	0.00773074	0.00440441
492.88	0.315391	0.022605	0.00241038	0.00700071	0.00786757	0.00441876
493.2	0.317223	0.0231726	0.00244208	0.00704919	0.00800451	0.00443308
493.51	0.319054	0.0237411	0.0024739	0.00709756	0.00814154	0.00444737
493.82	0.320882	0.0243105	0.00250585	0.00714584	0.00827867	0.00446164
494.13	0.322709	0.0248807	0.00253792	0.00719401	0.0084159	0.00447589
494.44	0.324535	0.0254517	0.00257012	0.00724208	0.00855321	0.00449012
494.75	0.326358	0.0260235	0.00260245	0.00729005	0.00869062	0.00450432
495.07	0.32818	0.0265962	0.00263491	0.00733791	0.00882811	0.0045185
495.38	0.33	0.0271697	0.00266749	0.00738566	0.00896569	0.00453265
495.69	0.331818	0.0277439	0.00270021	0.0074333	0.00910335	0.00454678
496	0.333634	0.028319	0.00273305	0.00748084	0.00924111	0.00456088
496.31	0.335448	0.028895	0.00276602	0.00752826	0.00937894	0.00457496
496.62	0.33726	0.0294717	0.00279912	0.00757557	0.00951686	0.00458901
496.93	0.33907	0.0300492	0.00283235	0.00762277	0.00965486	0.00460303
497.24	0.340878	0.0306275	0.00286571	0.00766985	0.00979294	0.00461703
497.55	0.342684	0.0312066	0.0028992	0.00771682	0.00993109	0.004631
497.87	0.344488	0.0317865	0.00293283	0.00776366	0.0100693	0.00464494
498.19	0.34629	0.0323671	0.00296658	0.00781038	0.0102076	0.00465885
498.5	0.348089	0.0329485	0.00300046	0.00785698	0.010346	0.00467274
498.82	0.349886	0.0335306	0.00303448	0.00790345	0.0104844	0.0046866
499.14	0.35168	0.0341135	0.00306862	0.00794979	0.0106228	0.00470042
499.45	0.353472	0.0346971	0.0031029	0.007996	0.0107614	0.00471422
499.77	0.355262	0.0352813	0.00313731	0.00804208	0.0108999	0.00472799
500.08	0.357049	0.0358663	0.00317186	0.00808802	0.0110385	0.00474173
500.4	0.358833	0.036452	0.00320653	0.00813382	0.0111772	0.00475543
500.71	0.360614	0.0370383	0.00324134	0.00817948	0.0113159	0.0047691
501.03	0.362393	0.0376252	0.00327629	0.008225	0.0114546	0.00478274
501.34	0.364168	0.0382128	0.00331136	0.00827036	0.0115934	0.00479635
501.66	0.365941	0.038801	0.00334657	0.00831558	0.0117322	0.00480992
501.97	0.367711	0.0393898	0.00338191	0.00836064	0.011871	0.00482346
502.29	0.369477	0.0399793	0.00341739	0.00840556	0.0120098	0.00483697
502.6	0.37124	0.0405693	0.003453	0.00845031	0.0121486	0.00485044
502.92	0.373001	0.0411598	0.00348875	0.00849491	0.0122874	0.00486388
503.23	0.374758	0.041751	0.00352463	0.00853934	0.0124263	0.00487728
503.54	0.376511	0.0423428	0.00356065	0.00858362	0.0125651	0.00489064
503.86	0.378262	0.0429351	0.0035968	0.00862774	0.012704	0.00490397
504.17	0.380009	0.0435281	0.00363309	0.00867169	0.0128429	0.00491726
504.49	0.381753	0.0441216	0.00366952	0.00871548	0.0129818	0.00493051
504.8	0.383493	0.0447157	0.00370608	0.0087591	0.0131207	0.00494373
505.11	0.38523	0.0453103	0.00374278	0.00880256	0.0132595	0.00495691
505.43	0.386963	0.0459055	0.00377962	0.00884584	0.0133984	0.00497004
505.74	0.388692	0.0465012	0.00381659	0.00888895	0.0135373	0.00498314
506.05	0.390418	0.0470975	0.0038537	0.00893188	0.0136762	0.0049962
506.36	0.39214	0.0476943	0.00389096	0.00897464	0.013815	0.00500922
506.68	0.393858	0.0482916	0.00392835	0.00901721	0.0139539	0.0050222
506.99	0.395573	0.0488895	0.00396587	0.00905961	0.0140927	0.00503514
507.3	0.397283	0.0494879	0.00400354	0.00910182	0.0142315	0.00504804
507.61	0.39899	0.0500868	0.00404135	0.00914385	0.0143703	0.0050609
507.93	0.400692	0.0506862	0.0040793	0.0091857	0.0145091	0.00507371
508.24	0.40239	0.051286	0.00411738	0.00922735	0.0146478	0.00508648
508.55	0.404085	0.0518864	0.00415561	0.00926882	0.0147865	0.00509921
508.86	0.405775	0.0524872	0.00419398	0.00931009	0.0149252	0.00511189
509.17	0.407461	0.0530885	0.00423249	0.00935117	0.0150639	0.00512453
509.48	0.409142	0.0536903	0.00427114	0.00939205	0.0152025	0.00513712
509.79	0.410819	0.0542925	0.00430994	0.00943273	0.0153411	0.00514967
510.11	0.412492	0.0548951	0.00434887	0.00947321	0.0154796	0.00516218
510.42	0.41416	0.0554982	0.00438795	0.00951349	0.0156181	0.00517464
510.73	0.415824	0.0561018	0.00442717	0.00955357	0.0157566	0.00518705
511.04	0.417484	0.0567058	0.00446653	0.00959344	0.015895	0.00519942
511.35	0.419139	0.0573102	0.00450604	0.00963311	0.0160333	0.00521174
511.66	0.420789	0.0579151	0.00454569	0.00967257	0.0161716	0.00522401
511.97	0.422435	0.0585204	0.00458549	0.00971183	0.0163099	0.00523624
512.28	0.424076	0.0591261	0.00462543	0.00975087	0.0164481	0.00524842
512.59	0.425712	0.0597322	0.00466551	0.00978971	0.0165863	0.00526055
512.9	0.427344	0.0603387	0.00470574	0.00982832	0.0167244	0.00527263
513.21	0.42897	0.0609456	0.00474612	0.00986672	0.0168624	0.00528466
513.52	0.430592	0.0615528	0.00478664	0.0099049	0.0170004	0.00529665
513.83	0.432209	0.0621604	0.00482731	0.00994285	0.0171382	0.00530858
514.14	0.43382	0.0627684	0.00486812	0.00998058	0.0172761	0.00532046
514.45	0.435427	0.0633767	0.00490908	0.0100181	0.0174138	0.00533229
514.75	0.437028	0.0639854	0.00495019	0.0100554	0.0175515	0.00534407
515.06	0.438624	0.0645943	0.00499144	0.0100924	0.017689	0.0053558
515.37	0.440215	0.0652036	0.00503285	0.0101292	0.0178265	0.00536747
515.68	0.441801	0.0658132	0.0050744	0.0101658	0.0179639	0.0053791
515.99	0.443381	0.066423	0.00511609	0.0102021	0.0181012	0.00539067
516.3	0.444955	0.0670331	0.00515794	0.0102382	0.0182384	0.00540218
516.61	0.446524	0.0676434	0.00519994	0.0102741	0.0183754	0.00541364
516.91	0.448088	0.0682539	0.00524208	0.0103096	0.0185124	0.00542504
517.22	0.449646	0.0688647	0.00528437	0.010345	0.0186492	0.00543639
517.53	0.451197	0.0694757	0.00532682	0.0103801	0.018786	0.00544769
517.84	0.452744	0.0700869	0.00536941	0.0104149	0.0189226	0.00545893
518.14	0.454284	0.0706983	0.00541215	0.0104495	0.0190591	0.00547011
518.45	0.455819	0.07131	0.00545505	0.0104839	0.0191955	0.00548123
518.76	0.457347	0.0719218	0.00549809	0.0105179	0.0193317	0.0054923
519.07	0.45887	0.0725339	0.00554129	0.0105518	0.0194679	0.00550331
519.37	0.460387	0.0731462	0.00558464	0.0105853	0.0196039	0.00551426
519.68	0.461898	0.0737587	0.00562814	0.0106186	0.0197398	0.00552515
519.99	0.463403	0.0743715	0.0056718	0.0106517	0.0198755	0.00553599
520.29	0.464902	0.0749844	0.0057156	0.0106845	0.0200112	0.00554676
520.6	0.466395	0.0755975	0.00575956	0.010717	0.0201467	0.00555748
520.91	0.467881	0.0762109	0.00580368	0.0107492	0.0202821	0.00556814
521.21	0.469362	0.0768245	0.00584795	0.0107812	0.0204174	0.00557874
521.52	0.470836	0.0774383	0.00589237	0.010813	0.0205525	0.00558927
521.82	0.472304	0.0780523	0.00593695	0.0108444	0.0206875	0.00559975
522.13	0.473766	0.0786665	0.00598169	0.0108756	0.0208224	0.00561016
522.44	0.475221	0.079281	0.00602658	0.0109065	0.0209572	0.00562051
522.74	0.47667	0.0798957	0.00607163	0.0109372	0.0210918	0.00563081
523.05	0.478113	0.0805106	0.00611683	0.0109675	0.0212263	0.00564104
523.35	0.479549	0.0811257	0.00616219	0.0109976	0.0213607	0.0056512
523.66	0.480979	0.0817411	0.00620771	0.0110275	0.021495	0.00566131
523.96	0.482402	0.0823566	0.00625339	0.011057	0.0216291	0.00567135
524.27	0.483819	0.0829723	0.00629923	0.0110863	0.021763	0.00568132
524.57	0.485229	0.0835882	0.00634522	0.0111153	0.0218969	0.00569124
524.88	0.486632	0.0842044	0.00639138	0.011144	0.0220306	0.00570109
525.18	0.488029	0.0848208	0.00643769	0.0111724	0.0221641	0.00571087
525.48	0.48942	0.0854374	0.00648417	0.0112005	0.0222976	0.00572059
525.79	0.490804	0.0860542	0.0065308	0.0112284	0.0224309	0.00573025
526.09	0.492181	0.0866713	0.0065776	0.011256	0.022564	0.00573984
526.4	0.493551	0.0872886	0.00662456	0.0112833	0.0226971	0.00574936
526.7	0.494915	0.0879062	0.00667168	0.0113103	0.02283	0.00575882
527	0.496272	0.088524	0.00671896	0.0113371	0.0229627	0.00576822
527.31	0.497622	0.089142	0.0067664	0.0113635	0.0230954	0.00577754
527.61	0.498965	0.0897602	0.00681401	0.0113897	0.0232279	0.0057868
527.91	0.500301	0.0903787	0.00686179	0.0114155	0.0233602	0.00579599
528.22	0.50163	0.0909974	0.00690972	0.0114411	0.0234924	0.00580512
528.52	0.502953	0.0916163	0.00695782	0.0114664	0.0236245	0.00581417
528.82	0.504268	0.0922354	0.00700609	0.0114914	0.0237564	0.00582316
529.12	0.505576	0.0928547	0.00705452	0.0115161	0.0238882	0.00583208
529.43	0.506877	0.0934742	0.00710311	0.0115405	0.0240198	0.00584092
529.73	0.50817	0.0940938	0.00715188	0.0115645	0.0241513	0.0058497
530.03	0.509456	0.0947136	0.0072008	0.0115883	0.0242826	0.00585841
530.33	0.510735	0.0953336	0.0072499	0.0116118	0.0244137	0.00586704
530.64	0.512006	0.0959537	0.00729916	0.0116349	0.0245446	0.0058756
530.94	0.51327	0.0965738	0.00734859	0.0116578	0.0246754	0.00588409
531.24	0.514525	0.0971941	0.00739818	0.0116803	0.024806	0.00589251
531.54	0.515773	0.0978144	0.00744794	0.0117025	0.0249364	0.00590085
531.84	0.517014	0.0984348	0.00749787	0.0117243	0.0250666	0.00590912
532.14	0.518246	0.0990552	0.00754797	0.0117459	0.0251966	0.00591731
532.44	0.51947	0.0996757	0.00759824	0.0117671	0.0253264	0.00592542
532.75	0.520686	0.100296	0.00764867	0.011788	0.025456	0.00593346
533.05	0.521894	0.100917	0.00769928	0.0118085	0.0255854	0.00594143
533.35	0.523094	0.101537	0.00775005	0.0118287	0.0257147	0.00594931
533.65	0.524286	0.102158	0.007801	0.0118486	0.0258436	0.00595712
533.94	0.52547	0.102778	0.00785212	0.0118681	0.0259724	0.00596485
534.23	0.526645	0.103399	0.0079034	0.0118873	0.026101	0.0059725
534.51	0.527811	0.10402	0.00795486	0.0119061	0.0262293	0.00598007
534.82	0.528969	0.10464	0.00800649	0.0119246	0.0263574	0.00598755
535.12	0.530118	0.105261	0.00805829	0.0119427	0.0264853	0.00599496
535.42	0.531258	0.105881	0.00811026	0.0119605	0.0266129	0.00600229
535.72	0.53239	0.106501	0.00816241	0.0119779	0.0267403	0.00600953
536.02	0.533513	0.107121	0.00821472	0.0119949	0.0268674	0.00601669
536.32	0.534626	0.107741	0.00826721	0.0120116	0.0269943	0.00602376
536.62	0.53573	0.108361	0.00831988	0.0120279	0.0271209	0.00603075
536.92	0.536826	0.108981	0.00837271	0.0120438	0.0272472	0.00603766
537.22	0.537911	0.1096	0.00842572	0.0120594	0.0273733	0.00604448
537.52	0.538988	0.11022	0.00847891	0.0120745	0.0274991	0.00605121
537.82	0.540055	0.110839	0.00853227	0.0120893	0.0276246	0.00605785
538.12	0.541112	0.111457	0.0085858	0.0121037	0.0277499	0.00606441
538.42	0.54216	0.112076	0.00863951	0.0121177	0.0278748	0.00607087
538.72	0.543198	0.112694	0.0086934	0.0121313	0.0279994	0.00607725
539.02	0.544226	0.113312	0.00874746	0.0121445	0.0281237	0.00608354
539.31	0.545244	0.11393	0.00880169	0.0121573	0.0282477	0.00608973
539.61	0.546252	0.114547	0.0088561	0.0121697	0.0283714	0.00609584
539.91	0.547249	0.115164	0.00891069	0.0121817	0.0284948	0.00610185
540.21	0.548237	0.115781	0.00896546	0.0121933	0.0286179	0.00610777
540.51	0.549215	0.116398	0.0090204	0.0122044	0.0287406	0.0061136
540.81	0.550182	0.117014	0.00907552	0.0122152	0.028863	0.00611933
541.11	0.551139	0.117629	0.00913082	0.0122255	0.028985	0.00612497
541.4	0.552085	0.118244	0.0091863	0.0122354	0.0291068	0.00613051
541.7	0.553021	0.118859	0.00924196	0.0122449	0.0292281	0.00613596
542	0.553946	0.119473	0.00929779	0.0122539	0.0293491	0.00614131
542.3	0.55486	0.120087	0.00935381	0.0122625	0.0294697	0.00614656
542.59	0.555763	0.1207	0.00941	0.0122707	0.02959	0.00615172
542.89	0.556655	0.121313	0.00946637	0.0122784	0.0297098	0.00615677
543.19	0.557535	0.121925	0.00952292	0.0122856	0.0298293	0.00616172
543.49	0.558404	0.122536	0.00957966	0.0122924	0.0299484	0.00616658
543.78	0.559262	0.123147	0.00963657	0.0122988	0.030067	0.00617133
544.08	0.560108	0.123757	0.00969366	0.0123047	0.0301852	0.00617597
544.38	0.560942	0.124367	0.00975094	0.0123101	0.030303	0.00618052
544.67	0.561765	0.124975	0.00980839	0.012315	0.0304204	0.00618495
544.97	0.562575	0.125583	0.00986603	0.0123194	0.0305373	0.00618929
545.27	0.563374	0.12619	0.00992384	0.0123234	0.0306537	0.00619351
545.56	0.56416	0.126796	0.00998184	0.0123268	0.0307697	0.00619763
545.86	0.564933	0.127402	0.01004	0.0123298	0.0308851	0.00620164
546.15	0.565694	0.128006	0.0100984	0.0123322	0.0310001	0.00620554
546.45	0.566442	0.12861	0.0101569	0.0123342	0.0311147	0.00620933
546.75	0.567178	0.129212	0.0102157	0.0123356	0.0312287	0.006213
547.04	0.567901	0.129814	0.0102746	0.0123365	0.0313422	0.00621657
547.34	0.568611	0.130415	0.0103337	0.012337	0.0314552	0.00622003
547.63	0.569308	0.131014	0.0103929	0.0123368	0.0315676	0.00622337
547.93	0.569992	0.131613	0.0104524	0.0123362	0.0316796	0.0062266
548.22	0.570662	0.13221	0.010512	0.0123351	0.031791	0.00622971
548.52	0.57132	0.132807	0.0105719	0.0123334	0.031902	0.00623271
548.81	0.571964	0.133403	0.0106319	0.0123311	0.0320123	0.00623559
549.11	0.572595	0.133997	0.0106921	0.0123284	0.0321222	0.00623836
549.4	0.573212	0.13459	0.0107525	0.0123251	0.0322314	0.006241
549.7	0.573815	0.135183	0.010813	0.0123212	0.0323402	0.00624353
549.99	0.574404	0.135774	0.0108738	0.0123168	0.0324483	0.00624595
550.28	0.57498	0.136364	0.0109348	0.0123119	0.0325559	0.00624824
[truncated: 15,496 more rows]

## Sheet: Sheet4
0.035221	-0.0902135	0.0268753	-0.00195679	-0.000792008	-0.000126829	-5.44619e-06
[truncated: 1,999 more rows]

[truncated: 2 more sheets: Sheet5, Sheet6]
